# Supplementary material for: Diversity and distribution of Symbiodiniaceae detected on coral reefs of Lombok, Indonesia using environmental DNA metabarcoding
Source: PeerJ. 2022 Oct 24;10:e14006. doi: 10.7717/peerj.14006 (PMC9610659; doi:10.7717/peerj.14006)
Supplement: File S1 [file peerj-10-14006-s002.xlsx]

## Sheet: OTU data
No	Feature_id	OTU_id	length	frequency	observed in (sample)	sequence
1	c3ee8526de03da01ad3d737711cd9f56	OTU_1	145	75508	37	GTCACACTATGAAAGTGAATCGTATTCAAAGAAATTGTTCTTTTTTTTACCTATATCACTTTTCCATTTATTGATGTGATGTCGTACTTAAAAGATGTTTTTACAATTCTGTTTATGATTGTAGTGAAGTCGTAACAAGGTAGCT
2	b991eb96bb7b322b992e1ce0910107f9	OTU_2	133	50097	22	GTCGCTACTACCGATTGAACGTTTTAGTGAGGTATTTGGACTGAGCCTTCGGGGACCTCTCGTCTCCGTTGTTGCTCGGAAAGACTCCCAAACTTGAGCGTTTAGAGGAAGTAAAAGTCGTAACAAGGTTTCC
3	89cb70361e0b2c5493eac0a716288636	OTU_3	136	49802	39	GTCGCTACTACCGATTGGATGGTTTAGTGAGGTCCTCGGATCGGCCCCGCCGGGGTCGGTCACGGCCCTGGCGGAGCGCCGAGAAGACGATCAAACTTGACTATCTAGAGGAAGTAAAAGTCGTAACAAGGTTTCC
4	e02863b01de58e6339992ffb0dfaad61	OTU_4	132	49627	13	GTCGCTACTACCGATTGAATGGTTTAGTGAGATCTTCGGATTGGCACAATCGCGGCCTAACGGAAGTGATGGTGCCGAAAAGTTGCTCAAACTTGATCATTTAGAGGAAGTAAAAGTCGTAACAAGGTTTCC
5	37983599da34156f5fd64e2c604a268d	OTU_5	131	46705	8	CGTCGCTACTACCGATTGAACATTTTAGTGAGGTCCTCGGACTGTGAGCCTGGCGGGTCGCCCTGCCTGGTCTACGGGAAGACGACCAAACTGTAGTGTTTAGAGGAAGTAAAAGTCGTAACAAGGTTTCC
6	590f64a44facc52cd027c3f6c1ef9af9	OTU_6	106	41921	36	GTCACACCATGGGAGTGTATTGCACCAGAAGTGGGTAGTCTAACCTTCGGGAGGGCGCTCACCACGGTGTGGTCCATGACTGGGGTGAAGTCGTAACAAGGTAGCC
7	6d4981b585ad288f43358bf76b4d5dcf	OTU_7	132	38918	37	GTCGCTCCTACCGATTGAATGGTCCGGTGAAGCGTTTGGACTATGGTTTTCTGACGGTTCGCCATTGGATTACCGTGGGAAATTCGTTAAACCTTATCATTTAGAGGAAGGAGAAGTCGTAACAAGGTTTCC
8	6bb6d5805cf87f433356a873aab61fb4	OTU_8	106	33278	36	GTCACACCATGGAAGTGGATTGCACCAGAAGTAGATAGTCTAACCTTCGGGAGGGCGTTTACCACGGTGTGCTTCATGACTGGGGTGAAGTCGTAACAAGGTAGCC
9	1da16759bbe92942257345d8104fd234	OTU_9	139	32857	9	GTCGCTACTACCGATGAACGGTTCAGTGAGGCCCTCGGAAGTCCCCCGGGCTGGTGGTTCTCTGCCAGCTGTCTGGTTGCGGACCAAAGACGGTCGAACTCAATCGTTTAGAGGAAGTAAAAGTCGTAACAAGGTTTCC
10	178ed3007e4de9db92330fde5facf76a	OTU_10	131	27395	39	CCGTCGCACCTACCGATTGAGTGGTCCGGTGAAGTCTCGAGATTGTGGCAATCTCCTTTATTGGAGTTTGACTGCGAGAACTTGCCTAAACCTTATCACTTAGAGGAAGGTGAAGTCGTAACAAGGTTTCC
11	6d6628fa112c7c53d1438e00d56fdcef	OTU_11	132	27082	16	GTCGCTACTACCGATTGAATGGCTTAGTGAGGTCTTCGGATCGGCTTTGGGGAGCCGGCAACGGCACCTCATTGCTGAGAAGTTGATCAAACTTGGTCATTTAGAGGAAGTAAAAGTCGTAACAAGGTTTCC
12	4dcf8aab2b1c0393b34c6aa6a1a1d00b	OTU_12	133	24457	21	GTCGCTACTACCGATTGAACGTTTTAGTGAGGTATTTGGACGAGGCCTTTCGAGGTTTTTAATCTCGATCGTTGCCTTGGAAGACTCCCAAACTTGAGCGTTTAGAGGAAGTAAAAGTCGTAACAAGGTTTCC
13	1b6f334a42ac152be697497779d06361	OTU_13	131	22383	15	CCGTCGCTCCTACCGATTGAGTGATCCGGTGAATAATTTGGACTGCAGTAATGTTTGGATCCCGAATATTGCAGCGGAAAGTTTAGTGAACCTTATCACTTAGAGGAAGGAGAAGTCGTAACAAGGTTTCC
14	f0be5531624c827e14746ca2f610f7ba	OTU_14	128	19136	39	GTCGCTCCTACCGATTGAATGCTCAGGTGAGCCATTCGGACTGTGATCATGTCGGTTTCCGATTTTGATTATGGAAAGTCTTGCGAACCTTATCATTTAGAGGAAGGAGAAGTCGTAACAAGGTTTCC
15	da6b3cc72a29241d16fdcf32e96cc16f	OTU_15	131	18613	40	CGTCGCACCTACCGATTGAATGGTCCGGTGAAGCCTCGGGATTGTGGCGAGTTCCCTTTATTGGGAGTTTGTCGCGAGAACTTGTCTAAACCTTATCATTTAGAGGAAGGTGAAGTCGTAACAAGGTTTCC
16	fd7043e394422ff07bfa836285c67214	OTU_16	131	18227	31	CCGTCGCTCCTACCGATTGAGTGATCCGGTGAATAATTCGGACTGCAGCAATGTTTGGATCCCGAACGTTGCAGCGGAAAGTTTAGTGAACCTTATCACTTAGAGGAAGGAGAAGTCGTAACAAGGTTTCC
17	a8ec7b66a794239027e3d955cdfec2e6	OTU_17	131	17703	11	CGTCGCACCTACCGATTGAATGGTCCGGTGAAGACTCGAGACTGTGGTCTGGCTCCTTTATTGGGGCTTGACCGCGGGAACTTGTCTAAACCTTATCATTTAGAGGAAGGTGAAGTCGTAACAAGGTTTCC
18	41f13b64037fb4bb8948926434896022	OTU_18	162	16561	32	GTCACACTCTGAAAATTTTCATGCCTTGAAGCAAAAGAAATTCGCAACGAACACACAGCCAAAAAACAAAAGACCACACTTTCCTTCTTTTTATCTGTGTCGTTGTTGGGTTCTTTTCTAGAGTTAGGAAGGTAATTGGAGTGAAGTCGTAACAAGGTAGCT
19	e886e8ce4c5a0232dd489a73db52102e	OTU_19	131	16369	20	CCGTCGCTCCTACCGATTGAGTGATCCGGTGAATAATTCGGACTGCAGCAGTGTTCGGTTCCTGAACGTTGCAGCGGAAAGTTTAGTGAACCTTATCACTTAGAGGAAGGAGAAGTCGTAACAAGGTTTCC
20	e265c9b4be9a96618f4496ce4a44adbe	OTU_20	131	15823	15	GTCGCTACTACCGATTGGACGTTTTAGTGAGACATTTGGACTGGGTTAAGATAGTCGCAAGACTACCTTTTCTCCGGAAAGACTTTCAAACTTGAGCGTCTAGAGGAAGTAAAAGTCGTAACAAGGTTTCC
21	effde0d180994ef85936f3af4b1ae8eb	OTU_21	132	13252	6	GTCGCTACTACCGATTGAACGTTTTAGTGAGGTATTTGGACTGGGCCTTTGGAGGATTCGTTCTCCAATGTTGCTCGGGAAGACTCCCAAACTTGAGCGTTTAGAGGAAGTAAAAGTCGTAACAAGGTTTCC
22	3bd0fe508639bcbab507dc9a0a0d8e83	OTU_22	131	13049	32	CCGTCGCTCCTACCGATTGAGTGATCCGGTGAATAATTCGGACTGCAGCAGTGTTCAGTTCCTGAACGTTGCAGCGGAAAGTTTAGTGAACCTTATCACTTAGAGGAAGGAGAAGTCGTAACAAGGTTTCC
23	631e1d8e37d60275478192c6de71c752	OTU_23	131	12458	33	CGTCGCACCTACCGATTGAATGGTTCGGTGAAATCTCCGGATTGGAGCACGCAAGCTTCACGGCGAACGTGCTTTGAGAAGTTGATTAAACCTCACTATTTAGAGGAAGGTGAAGTCGTAACAAGGTTTCC
24	db7b95761f05f0fc74d112944af253af	OTU_24	131	12301	8	CGTCGCTACTACCGATTGAATGGTTTAGCAAGGTCTTCGGATTGGCGCCTGACAGTTTCGACTGTCTTGGTGTCCGAGAAGATGATCAAACTTGATCATTTAGAGGAAGTAAAAGTCGTAACAAGGTTTCC
25	fbf44a9dfc990fce8011d4be5fca0c9e	OTU_25	106	12127	34	GTCACACCATGGAAGTGTGTTGCACCAGAAGTAGGTAGTCTAACCTTCGGGAAGGCGCTTACCACGGTGTGATCCATGACTGGGGTGAAGTCGTAACAAGGTAGCC
26	6922aeb779befedeae9033f98d1519b0	OTU_26	131	11179	28	GTCGCACCTACCGATTGGATGGTCCGGTGAAGCCTCGGGATTGTGGTTCTTGCCGCTTTATTGTGGCGTGACCGCGAGAACTTGTCTAAACCTTATCATCTAGAGGAAGGTGAAGTCGTAACAAGGTTTCC
27	e98db571f5d98b2f5087fcebc48efd49	OTU_27	136	10657	2	GTCGCTACTACCGATTGAATGGTTTAGTGAGATCCTCGGATTGGACCCGTTTTGGAGGGCAACCTTCGAGACGGTGTGCCGAGAAGACGATCAAACTTGATCATTTAGAGGAAGTAAAAGTCGTAACAAGGTTTCC
28	3f1d9f1800bf5975058d82326a885d1a	OTU_28	106	10387	34	GTCACATCATGAAAGTCGATTGTACCCGAAGTCGCCGAGTTAACCGCAAGGAGACAAGCGCCGAAGGTATGGTTGGTAATTGGGATGAAGTCGTAACAAGGTAGCC
29	f48a7a2d81dbfb9ee5c08c255d07e60e	OTU_29	131	10340	3	CGTCGCTACTACCGATTGAACGTTTTAGTGAGGTCCTCGGACTGTGAGCCTGGCGGGTCATTCTGCCTGGTCTGCGGGAAGACGACCAAACTGTAGCGTTTAGAGGAAGTAAAAGTCGTAACAAGGTTTCC
30	3a0c19f5355c37dac277fa383b30118b	OTU_30	136	9912	11	GTCGCTACTACCGATTGAATGGTTCAGTGAGATAATCGGACAGATAACTTGGTAACTGGCAACAGTTAACGTGCATATTTGGAAGACGATCAAACTTGGTCATTTAGAGGAAGTAAAAGTCGTAACAAGGTTTCCG
31	b23f2a4002debf6ab3a24130c176f8de	OTU_31	136	9823	12	GTCGCTACTACCGATTGAATGGTTCAGTGAGATAATCGGATAGATAACTTGGCAATTTGCAAAAGTTACCGAGCATATTTAGAAGACGATCAAACTTAGTCATTTAGAGGAAGTAAAAGTCGTAACAAGGTTTCCG
32	d5b3cf7b11b289d32b83da4125116934	OTU_32	132	9786	10	GTCGCTACTACCGATTGAACGTTTTAGTGAGGTATTTGGACTGGACCTTCTGAGGTTTGCGCCTCAGTTGCCGTTCGGGAAGACTCCCAAACTTGAGCGTTTAGAGGAAGTAAAAGTCGTAACAAGGTTTCC
33	8f98c1c13d38d3d080a758f908222968	OTU_33	131	9527	24	CGTCGCACCTACCGATTGAATGGTCCGGTGAAGCCTCGAGATTGTGGTTAGTTTCCTTTATTGGATGTTAGCCGCGAGAACTTGTCTAAACCTTATCATTTAGAGGAAGGTGAAGTCGTAACAAGGTTTCC
34	81fd34670ab5bced282f49c7ac35e59c	OTU_34	133	9428	3	GTCGCTACTACCGATTGAACGTTTTAGTGAGGTATTTGGACGAGGCCTTTCGAGGTTTTTAATCTCGATTGTTGCCTTGGAAGACTCCCAAACTTGAGCGTTTAGAGGAAGTAAAAGTCGTAACAAGGTTTCC
35	8f3598ec31b4e219c8a9623f8da9c2ae	OTU_35	136	9289	7	GTCGCTACTACCGATTGAATGGTTTAGTGAGATCCTCGGATTGGTTTCGTCGGGTTGGGTAACTGACCTGACGTTTAACCGAGAAGACGATCAAACTTGATCATTTAGAGGAAGTAAAAGTCGTAACAAGGTTTCC
36	d749cc7dc24627de9b19d5d2806b95cb	OTU_36	127	8656	29	GTCGCTCCTACCGATTGAATGTTCCGGTGAATACTTCGGACTGCGAGGTTTGCAGTTTCTGCGTTCCTTGCGGAAAGTTGAATAAACCTTAACATTTAGAGGAAGGAGAAGTCGTAACAAGGTTTCC
37	d06066c557ac3be9a25b76362c4ae8b4	OTU_37	128	8334	3	GTCGCTACTACCGATTGAACGTTTTAGTGAGGTCCTCGGACTGTGATTCAGGCGGGCAACTGCCTGGTTTGCGGAAAGACGACCAAACTGTAGCGTTTAGAGGAAGTAAAAGTCGTAACAAGGTTTCC
38	af2d20002e8ea63f5f6dad79ad68eeb8	OTU_38	106	8333	32	GTCACACCATGGGAGTGGGTTGCTCCAGAAGTAGCTAGTCTAACCTTCGGGGGGACGGTTACCACGGAGTGATTCATGACTGGGGTGAAGTCGTAACAAGGTAGCC
39	f4880d48cee8834f1e5bfbf63293ac6f	OTU_39	106	8260	31	GTCACACCATGAGAGTTGGTTTTATCTTAAGTCAGTGCGCTAACCTTCGGGAGGCAGCTGCCCACGGTACGGCCAGCGATTGGGGTGAAGTCGTAACAAGGTAGCC
40	de04b52c713c2e40e13c359131035391	OTU_40	131	8199	23	CCGTCGCTCCTACCGATTGAGTGATCCGGTGAATAATTCGGACTGCAGCAGTGTTCAGTTCCTGAACGTTGCAGTGGAAAGTTTAGTGAACCTTATCACTTAGAGGAAGGAGAAGTCGTAACAAGGTTTCC
41	61956237849d076acba6b493a91fd577	OTU_41	131	7172	12	CCGTCGCTCCTACCGATTGAGTGATCCGGTGAATAATTTGGACTGCAGCAATGCTTGGATCCCGAATGTTGCAGCGGAAAGTTTAGTGAACCTTATCACTTAGAGGAAGGAGAAGTCGTAACAAGGTTTCC
42	a70614eb21a37ad068e97c71f3dcce2b	OTU_42	131	7070	2	CGTCGCTACTACCGATTGAACGTTTTAGTGAGGCATTTGGACCGACGCTTTTCAGTGTAATAGCTGGTTTGTGTTGGAAAGATTTCCAAACTTGAGCGTTTAGAGGAAGTAAAAGTCGTAACAAGGTTTCC
43	b970d8460f2c424eb93c7c4f9b2f0275	OTU_43	131	7050	4	CCGTCGCTCCTACCGATTGAGTGATCCGGTGAATAATTCGGACTGCGACACTGTTCGGTTCCTGAACGTTGTTGCGGAAAGTTTAGTGAACCTTATCACTTAGAGGAAGGAGAAGTCGTAACAAGGTTTCC
44	8e579b42f3f7a2183c7e089fba273061	OTU_44	106	6910	26	GTCGTTTCTTCCGACTGATACTCATTGTGAGTTGCCAGGACCCTTCACTAGGAAATGGCTGCGAATGCTTTGTATTGGAGGAAGAAAAAGTCGTAACAAGGTTATC
45	027eb3b2396f93c16e40b6dd9e4ed8e2	OTU_45	137	6597	23	GTCGCTACTACCGATTGGATGGTTTAGTGAGGCCCTCGGATCGGCCCCGCCGGGGTCGGCCCACGGCCCTGGCGGAGCGCTGAGAAGACGGTCGAACTTGACTATCTAGAGGAAGTAAAAGTCGTAACAAGGTTTCC
46	96a2bd7f8ed8a07838609e6da51dc319	OTU_46	131	6299	29	GTCGCTACTACCGATTGAATGGCTTAGTGAGCCTTTGGGATTGGCAGCTTGTACCGGCAACGGTAGCAGGCCGCTGAAAACTTAGGCAAACTTGGTCATTTAGAGGAAGTAAAAGTCGTAACAAGGTTTCT
47	f8b337276172a5bc3b2a06f154963ab8	OTU_47	131	6284	2	CGTCGCTACTACCGATTGAACATTTTAGTGAGGTCCTCGGACTGTGAGCCTGGCGGGTCGCCCTGCCTGGTCTACGGGAAGACGACCAAACTGTAGTGTTTAGAGGAAGTAAAAGTCGTAACAAGGTTTCT
48	722b10075df446996fe9776183fe4d88	OTU_48	132	6258	30	GTCGCTCCTACCGATTGAATGGTCCGGTGAAGCGCTCGGACCGCGGCCTCTTGACGGTTCGCTGTCGATTGGCTGTGGGAAGTTCGTTAAACCTTATCATTTAGAGGAAGGAGAAGTCGTAACAAGGTTTCC
49	b36087bd0c97945325c750e8e3497fab	OTU_49	132	5995	28	GTCGCACCTACCGATTGAATGGTCCGGTGAGACTTTCGGACCGCAGCGAATGCTCGTTTACTCGGGCTTAGCATGCGGAAAGTTATTCAAACCTTACCATTTAGAGGAAGGTGAAGTCGTAACAAGGTTTCC
50	1d634dc438e390a4d653fc97f3bdc5df	OTU_50	131	5942	20	CCGTCGCTCCTACCGATTGAGTGATCCGGTGAATAATTCGGACTGCAGCAATGTTTGGATCCCGAACGTTGCAGTGGAAAGTTTAGTGAACCTTATCACTTAGAGGAAGGAGAAGTCGTAACAAGGTTTCC
51	2aac586f2e70d1ebda1d41570f7e4bf3	OTU_51	131	5889	21	GTCGCTACTACCGATTGAATGGCTTAGTGAGCCTTTGGGATTGGCAGCTTGTACCGGCAACGGTAGCAGGCAGCCGAAAACTTAGGCAAACTTGGTCATTTAGAGGAAGTAAAAGTCGTAACAAGGTTTCT
52	0722d37fec05a8c9d1c4901355578af3	OTU_52	131	5669	4	GTCGCTACTACTGATTGGGTGTTCAAGTGAGATGCTTAGACCCTTGCTTGTATGGTTCAATATTGTGCGGCGAAAGGAAAAAGTATCAAGCTTGAGTGTCTAGAGGAAGTAAAAGTCGTAACAAGGTTTCC
53	6f46e3962aa6e3b51b95055185adb035	OTU_53	106	5653	28	GTCACACCATGGGAGTTGGTTCTACCCGACGGCCGTGCGCTAACCTTTTGGAGGCAGCGGACCACGGTAGGATCAGCGACTGGGGTGAAGTCGTAACAAGGTAGCC
54	4c024e9ef2d56737a7ab7f250942d2f7	OTU_54	131	5628	3	GTCGCTACTACCGATTGGACGTTTTAGTGAGACATTTGGACTGATGTGGTGCTTGCTAACGCTGGCGCCATCGTCGGGAAGACTTTCAAACTTGAGCGTTTAGAGGAAGTAAAAGTCGTAACAAGGTTTCC
55	99f1032f27456dac95912cdfd2625a86	OTU_55	136	5588	1	GTCGCTACTACCGATTGAATGTTCTGGTGAAATCATCGGAGTGACACCGGTGGAGTGGTCTCCACTCGACCGGAGGTTGCGAAGACGCTTAAACCTGAGCATTTAGAGGAAGTAAAAGTCGTAACAAGGTTTCCGT
56	06419d18f26d2c3970d1f9bf018d56c9	OTU_56	136	5553	16	GTCGCTACTACCGATTGAATGGTTCAGTGAGATAATCGGACAGAAAACTTGGCAACTGGCAACAGTTGACGTGCATTTTTGGAAGACGATCAAACTTGGTCATTTAGAGGAAGTAAAAGTCGTAACAAGGTTTCCG
57	cc2f8e391cc24cd809d97b13a14ab217	OTU_57	136	5524	7	GTCGCTACTACCGATTGAATGGTTTAGTGAGATTTTTGGACTGGAACTCTCTTATTCAGCAATGAACGAGAGGGACTCCGGGAAGCTAATCTAACTGTATCATTTAGAGGAAGTAAAAGTCGTAACAAGGTTTCCG
58	e9995cd9fb0061c7d97c6199992f300e	OTU_58	106	5519	18	GTCACACCATGGGAGTGGGCTGCAAAAGAAGTGGATAGCTTAACCTTCGGGAGGGCGTTCACCACTTTGTGGTTCATGACTGGGGTGAAGTCGTAACAAGGTAGCC
59	12e5a74df6de34e711070c0caba6767e	OTU_59	131	5491	7	CGTCGCTACTACTGATTGGGTGTTCAAGTGAGATGCTTAGACCCTTGTTGCATGGTTCATTATTGTGCTTCGAAAGGAAAAAGTTTCAAGCTTGAGTGTCTAGAGGAAGTAAAAGTCGTAACAAGGTTTCC
60	a0c5b7585dca5ccbeb6312f232a3dfb0	OTU_60	105	5418	1	GTCACACCATGGGAGTGTATTGCACCAGAAGTGGGTAGTCTAACCTTCGGGAGGGCGCTCACCACGGTGTGGTCCATGACTGGGGTGAAGTCGTAACAAGGTAGC
61	08ce68de5ceeab53c2aaf5d74c58be6a	OTU_61	140	5415	3	GTCGCTACTACCGATTGAATGGTTTAGTGAGATCCTCGGATCGTCGGCGTCGGGACGGCTCTGCCGTCTCGTTCTGCATGTTACGAGAAGACGATCAAACTTGATCATTTAGAGGAAGTAAAAGTCGTAACAAGGTTTCC
62	0258f4bbe8e25b2de93192231c834efa	OTU_62	136	5405	20	GTCGCTACTACCGATTGAATGGTTCAGTGAGATAATCGGACAGATAACTTGGCAACTGGCAACAGTTGACGTGCATATTTGGAAGACGATCAAACTTGGTCATTTAGAGGAAGTAAAAGTCGTAACAAGGTTTCCG
63	c4eccbcc8c278410e5e9e6267ee2a8aa	OTU_63	106	5359	23	GTCACACCATGGGAGTGGGTTGCAAAAGAAGTAGGTAGCTTAACCTTCGGGAGGGCGCTTACCACTTTGTGATTCATGACTGGGGTGAAGTCGTAACAAGGTAACC
64	7aa074d0f654ce07badbfd4d080fec5d	OTU_64	136	5258	10	GTCGCTACTACCGATTGAATGGTTCAGTGAGATAATCGGACAGATAACTTGTCAACTGGCAACAGTTGACGCGCATATTTGGAAGACGATCAAACTTGGTCATTTAGAGGAAGTAAAAGTCGTAACAAGGTTTCCG
65	5f81202c6ed959e186db6a4185b15056	OTU_65	106	5136	27	GTCACACCATGGAAGTTGGTTACACCTTAAGGCAAATCGTCAACCTTCGGGAGACATTTGACTACGGTACGATCAGCAACTGGGGTGAAGTCGTAACAAGGTAGCC
66	cda0f94b11019ebbc5ede4ef26a53d56	OTU_66	132	5063	3	GTCGCTACTACCGATTGAACGTTTTAGTGAGGTATTTGGACTGGACCTTCGGAGGTTCGCGCCTCCGTTGCTGTTCGGGAAGACTCCCAAACTTGAGCGTTTAGAGGAAGTAAAAGTCGTAACAAGGTTTCC
67	fe64b7fa29f623efc2073187fcf1e319	OTU_67	137	4958	6	GTCGCTACTACCGATTGGATGGTTTAGCGAGAGCCTTGGATCGGAGCCCGGGAGGTCAGCGATGGCCGCCCGGGAGTACCTGAGAAATTGCTCCAGCTTGATCATCTAGAGGAAGTAAAAGTCGTAACAAGGTTTCC
68	9ad3dd885d56ce61fe1794cfde5cf292	OTU_68	131	4944	1	CCGTCGCTCCTACCGATTGAGTGATCCGGTGAATAATTCGGACTGCAGCATTGTTCAGTCCCTGAACGTTGTCGCGGAAAGTCTAGTGAACCTTATCACTTAGAGGAAGGAGAAGTCGTAACAAGGTTTCC
69	126fa166c58279418ea9b4921cdd5835	OTU_69	111	4922	1	GTCGCTACTACCGATTGAATGTCCTTGTGAGATCGGCTCACGCTAACGATAGGAAGTACGCCATATCAAATAAGGTCATTTAGAGGAAGTAAAAGTCGTAACAAGGTTTCC
70	8ace966310db9b90c612744400e81d69	OTU_70	133	4893	14	GTCGCTACTACCGATTGAATGGTTTAGTGAGGCCTTCTGACTGGCGCCGCTACTCTGGCAACAGAGCGGCGGATGCCGGGAAGTTGGTCAAACTTGATCATTTAGAGGAAGTAAAAGTCGTAACAAGGTTTCC
71	b239f5ced91c39e5013ce858350082f0	OTU_71	131	4775	33	CGTCGCTCCTACCGATTGAATGTGCCAGTGAAAAGTTCGGATTGGAGATAGGAGACGGCAACGTATCCTATTTCCGAGAAAATCTTTAAACTTTCCCATTTAGAGGAAGGAGAAGTCGTAACAAGGTTTCC
72	e10d38a413cd75db3c9484bf78a79534	OTU_72	132	4747	6	GTCGCTACTACCGATTGAACGTTTTAGTGAGGTATTTGGATTGGACCTCTGGAGGCGAAAGCTTCGAGTGTTGTTCGAGAAGACTCCCAAACTTGAGCGTTTAGAGGAAGTAAAAGTCGTAACAAGGTTTCC
73	f32cade589b4ae456d9f35c33ed9e250	OTU_73	138	4600	25	GTCGCTACTACCGATTGGGCGATTTAGTGAGCGCCTCGGATTGGACCCGGAACGATCGGCAACGACCGTACCGCTGTGTGCCGAAAAGACGCGCAAACTTGATCGCCTAGAGGAAGTAAAAGTCGTAACAAGGTTTCC
74	334bda51241d993f8ff8874ecd5d5926	OTU_74	133	4540	3	GTCGCTACTACCGATTGAACGTTTTAGTGAGGTATTTGGACGAGGCCTCTCGAGGTTTTTAATCTCGACTGTTGCCTTGGAAGACTCCCAAACTTGAGCGTTTAGAGGAAGTAAAAGTCGTAACAAGGTTTCC
75	ded39488628e7ee625a76ea239c652b4	OTU_75	132	4476	10	GTCGCTACTACCGATTGAATGGCTTAGTGAGGTCTCCGGATTGGCTTTGGGGAGCCGGCAACGGCACCCTATTGCTGAGAAGCTGATCAAACTTGGTCATTTAGAGGAAGTAAAAGTCGTAACAAGGTTTCC
76	8a69ef7d1961345c8c832383f3683a77	OTU_76	131	4342	5	CGTCGCTACTACCGATTGAACGTTTTAGTGAGGTCCTTGGATTGTGACCCTCTTGGCTCACGCTGACTGGGCTGCGAGAAGACGACCAAACTGAAGCGTTTAGAGGAAGTAAAAGTCGTAACAAGGTTTCC
77	d7e915be97685c2ea24fbf30bc61e057	OTU_77	131	4334	8	CGTCGCACCTACCGATTGAATGGTCCGGTGAAGCCTCGGGATTGTGATGAGTTTCCTTCATTGGGAGCTTGTTGCGAGAACTTGTCTAAACCTTATCATTTAGAGGAAGGTGAAGTCGTAACAAGGTTTCC
78	4ff6e37214fcb3404c13f9d35b7486fe	OTU_78	106	4320	15	GTCACACCATGGGAGTGGGTTGCACCAGAAGTAGCTAGTCTAACCTTCGGGAGGACGGTTACCACGGTGTGATTCATGACTGGGGTGAAGTCGTAACAAGGTAGCC
79	d6ca3688968012739af14979fc5d8314	OTU_79	104	4314	26	GTCACACCATGGGAGTGGGTTGCAAAAGAAGTGGGTAGTCTAACTTCGGAGGACGCTCACCACTTTGTGATTCATGACTGGGGTGAAGTCGTAACAAGGTAGCC
80	70f2355e0e8fa768a2d5ac68669b8cd9	OTU_80	131	4295	6	CGTCGCTACTACCGATTGAACGTTTTAGTGAGGTCCTCGGACTGTTTGGTAGTCGGATCACTCTGACTGCCTGGCGGGAAGACGACCAAACTGTAGCGTTTAGAGGAAGTAAAAGTCGTAACAAGGTTTCC
81	53cc82a0813174d496331428af8882f6	OTU_81	131	4286	5	CGTCGCTACTACCGATTGAACGTTTTAGTGAGGTCCTCGGACTGTCTGCCTCGCGGTTAACCCTGCTTGGCTGGCGGGAAGACGACCAAACTTGAGCGTTTAGAGGAAGTAAAAGTCGTAACAAGGTTTCC
82	6e29fd15eba350136138dccd5f04513f	OTU_82	132	4244	17	GTCGCACCTACCGATTGAATGGTCCGGTGAAATCTTCGGATCTGAGAGATGTTGGATTAATTTCTGACGCCTTTTGGAAAAGTCGCTTAAACCTTATCATTTAGAGGAAGGTGAAGTCGTAACAAGGTTTCC
83	1354f7ca448c23e77aa35bce708fb1ba	OTU_83	136	4185	1	GTCGCTACTACCGATTGAATGGTTTAGTGGGAATTTTGGACTGGAGCTTTCTTGTTCAGCAATGAACGAGAGAGAGTCCGGGAAGTCATTCTAACTGTATCATTTAGAGGAAGTAAAGGTCGTAACAAGGTTTCCG
84	6fa1d8b948fcf59e7c2fb7662eaaaba3	OTU_84	136	4152	7	GTCGCTACTACCGATTGGATGGTTTAGTGAGGTCCTCGGATCGGCCCCGCCGGGGTCGGTTACGGCCCTGGCGGAGCGCCGAGAAGACGATCAAACTTGACTATCTAGAGGAAGTAAAAGTCGTAACAAGGTTTCC
85	4be1f8ce16dc8a30c45e24ceadc20de0	OTU_85	137	4148	3	GTCGCTACTACCGATTGAATGGTTTAGTGAGATCTTCGGATCGGCCGCGTCGAGTTCGTTCGCGGCCCCGATCGTCGTGCCGAAAAGACGATCAAACTTGATCATTTAGAGGAAGTAAAAGTCGTAACAAGGTTTCC
86	277d1435a903794a72037a03e949aeda	OTU_86	106	4147	26	GTCACGCCATGGGAGTTGGTTTTACCTTAAGCCGGTGCGCTAACCGCAAGGAAGCAGCCGTCCACGGTAGGGTCAGCGACTGGGGCGAAGTCGTAACAAGGTAACC
87	4f76f8ce021691736331ed22e88b9e7b	OTU_87	136	4127	27	GTCGCTCCTACCGATTGGATGAATCGATGAGCCTTTCGGAGGAAAGTCGTGAAACCGCTTCGGTGGTGGACCTTCAGTCCAAAGTCATGCAAATCTGTTCATCTAGAGGAAGGAGAAGTCGTAACAAGGTTTCCGT
88	855e43af267ab6a6817f6ea8b557b9d1	OTU_88	133	4115	2	GTCGCTACTACCGATTGAACGTTTTAGTGAGGTATTTGGACTGAGCCTTCGGAGGTTTCTTATCTCCGTTGTTGCTCGGGAAGACTCCCAAACTTGAGCGTTTAGAGGAAGTAAAAGTCGTAACAAGGTTTCC
89	cac8c82974e586b857b10888cb83c508	OTU_89	104	4035	1	GTCACACCATGGGAGTCTATTGCACCAGAAGTAGGTAGCCTAACGAAAGAGGGCGCTTACCACGGTGTGGTCGATGACTGGGGTGAAGTCGTAACGAGGTAGCC
90	e65efaabd97257a5e003f8cde25c102e	OTU_90	106	4006	20	GTCACACCATGGGAGTTTGTTGCACCAGAAGTAGGTAGTCTAACCGCAAGGAGGACGCTTACCACGGTGTGGCCGATGACTGGGGTGAAGTCGTAACAAGGTAGCC
91	d46b45039a84d480081c9d12f0e64926	OTU_91	132	3987	8	GTCGCTACTACCGATTGAACGTTTTAGTGAGAAATCTGGATTCGACCTCTGTGGGTTCATTCCCACAGTGCTGTCGGAGAAGTTTTTCAAACTTGAGCGTTTAGAGGAAGTAAAAGTCGTAACAAGGTAGCT
92	45cbaccedd9c89ef578572ac045ff071	OTU_92	136	3976	1	GTCGCTACTACCGATTGAATGGTTTAGTGAGAATTTTGGACTGGAGCTTTCTTGTTCAGCAACGAACGAGAGAGAGTCCGGGAAGTCATTCTAACTGTATCATTTAGAGGAAGTAAAAGTCGTAACAAGGTTTCCG
93	80b7af71ab83a18c672415b0759b21e0	OTU_93	132	3972	17	GTCGCTGCTACCGATTGGATGGTCCGGTGAGAACTCTGGATTGTGATCGATGTGCCGGTCTCCGGTGCTTGATTGCGAGAAGTTGATCGAACCTTATCATCTAGAGGAAGCAAAAGTCGTAACAAGGTTTCC
94	af2cb8cf5cc50980d3c53fd51e3693d8	OTU_94	131	3952	25	CGTCGCACCTACCGATTGAATGGTCCGGTGAAGCCTCGGGATTGTGGCCAGTTCACTTTATTGGGAGTTGGCTGTGAGAACTTGTCTAAACCTTATCATTTAGAGGAAGGTGAAGTCGTAACAAGGTTTCC
95	093d26cb65f77bb02650e11561bea626	OTU_95	136	3947	9	GTCGCTACTACCGATTGGATGGTTTAGTGAGGTCCTCGGATCGGCCCCGCCGGGGTCGGTCACGGTCCTGGCGGAGCGCCGAGAAGACGATCAAACTTGACTATCTAGAGGAAGTAAAAGTCGTAACAAGGTTTCC
96	78f63e3c7d82712a7d7cb2f07e08ead8	OTU_96	131	3915	17	CGTCGCACCTACCGATTGAATGGTCCGGTGAAGCCTCGGGATTGTGGCGAGTTTCCTTTATTGGGAGTTTGTCGCGAGAACTTGTCTAAACCTTATCATTTAGAGGAAGGTGAAGTCGTAACAAGGTTTCC
97	b703d1273db5cd0b02d66cfa2cf48d22	OTU_97	131	3897	25	CGTCGCTCCTACCGATTGAGTGATCCGGTGAATAATTCGGACTGCAGCAGTGCTTGGTCCTCCGGGCTTTGCAGCGGAAAGTTTAGTGAACCTTATCACTTAGAGGAAGGAGAAGTCGTAACAAGGTTTCC
98	74473fa7fd3ae6c234dddac22a0a693d	OTU_98	132	3886	4	GTCGCTACTACCGATTGAATGGCTTAGTGAGGTCTTCGGATCGGCTTTGGGGAGCCGGCAACGGCACCTCATTGCTGAGAAGTTGATCAAACTTGGTCATTTAGAGGAAGTAAAAGTCGTAACAAGGTTTCT
99	b058f7652aa090ef670983f3d93d2823	OTU_99	131	3880	19	CGTCGCACCTACCGATTGAATGGTCCGGTGAAGCCTCGGGATTGTGGCGAGTTTCCTTTATTGGAAGTTTGTCGCGAGAACTTGTCTAAACCTTATCATTTAGAGGAAGGTGAAGTCGTAACAAGGTTTCC
100	eb70985d865a28cbd73218abf48d4f14	OTU_100	133	3805	3	GTCGCTACTACCGATTGAATGGTTTAGCGAGAACCTCGGATTGAACCCATGCCGTGCGCAAGCATGGTTGCGGGTTTGAAAAGAAGTTCAAGCTTGATCATTTAGAGGAAGTAAAAGTCGTAACAAGGTTTTC
101	f256dddbbbecf213bc2346218bbef0e1	OTU_101	131	3802	10	CGTCGCTACTACTGATTGGGTGTTCAAGTGAGATGCTTAGACCCTTGTTGCATGGTTCAATATTGTGCTGCGAAAGGAAAAAGTTTCAAGCTTGAGTGTCTAGAGGAAGTAAAAGTCGTAACAAGGTTTCC
102	194615fb44d953870ef0fb08b199e5f6	OTU_102	133	3784	3	GTCGCTACTACCGATTGAACGTTTTAGTGAGGCATTTGGATTGGTGATCTTTGATTCGCAAGTCTCATCGATATACCGAGAAGACTTCCAAACTTGAGCGTTTAGAGGAAGTAAAAGTCGTAACAAGGTTTCC
103	6f99be91593a9df314f0f5b303a3cc67	OTU_103	131	3776	15	CCGTCGCTCCTACCGATTGAGTGATCCGGTGAATAATTCGGACTGCAGCAGTGTTCAGTTCCTGAACGTTGCCGCGGAAAGTTTAGTGAACCTTATCACTTAGAGGAAGGAGAAGTCGTAACAAGGTTTCC
104	d41afd7606a86b7606788f74759fcb1e	OTU_104	133	3663	22	GTCGCTCCTACCGATTGAATGGTCCGGTGAGTTTTTTGGACTGTGGCAACGGTTTCGGTTCGCCGTACTGATGCCGCGGGAAGATACGCAAACCTTATCATTTAGAGGAAGGAGAAGTCGTAACAAGGTTTCC
105	91e68bde561d9844545b2b0ef25c3ef9	OTU_105	146	3616	10	GTCACACTATGAAAGTGAATCGTATTCAAAGAAATTGTTCTTTTTTTTTACCTATATCACTTTTCCATTTATTTGTGTGATGTCGTACTTAAAAGATGTTTTTACAATTCTGTTTATGATTGTAGTGAAGTCGTAACAAGGTAGCT
106	a7a0b7fb9a5c38a8ae7d50ad12f3c7fb	OTU_106	127	3614	8	GTCGCTCCTACCGATTGAGTGATCCGGTGAGTCCTTTAGAGTGTGTTGCATTTAGTTTCTATCCGTGACGTGTGAAGTTGAACAAACCTTATCACTTAGAGGAAGGAGAAGTCGTAACAAGGTTTCC
107	9a47ab2dce0b365df0e15b4ad7b0ca56	OTU_107	106	3541	27	GTCACACCATGGGAGTTGACAGGGGCAGAAGCCGCCGAGCCAACCTTCGGGAGGCAGGCGTCCAAGCTCCGGTTGATGACTGGGGTGAAGTCGTAACAAGGTAGCC
108	9ff4b91286cd5682d2b602ce82182ab5	OTU_108	128	3490	27	GTCGCTCCTACCGATTGAATGCTCAGGTGAGCCATTCGGACTTTCATCATGCTGGTTTCCAGTTTTGATGAAGGAAAGTCTTGCGAACCTTATCATTTAGAGGAAGGAGAAGTCGTAACAAGGTTTCC
109	b5046c77ee755988f85bb24a2b2faaf3	OTU_109	106	3475	5	GTCACACCATGGGAGTTTGTTGCACCAGAAGTAGCTAGCCTAACTGCAAAGAGGGCGGTTACCACGGTGTGGCCGATGACTGGGGTGAAGTCGTAACAAGGTAGCC
110	16f3a0c5927e9c96ddb73e15c9d5ccf5	OTU_110	142	3409	2	GTCGCTCTTACCGATGGACTTCTCTGTGAGGTTGAGGGACTGGCATTTTACATAACTCTAAGCTTGCTTAGGGCGCGTAACGCTATGGAAACTCAATCGAACAGTGGGGTCTAGAGGAAAGAGAAGTCGTAACAAGGCATCT
111	33ec6f53f099e8bb825f461f29a42aa8	OTU_111	131	3372	15	CGTCGCTCCTACCGATTGGATGAATCGATGAGCCTTTTGGAGAGCTGTTGTGAAGCCCTTGGGTGGAACTATAGCTCGAAATCATGCAAATCTGTTCATCTAGAGGAAGGAGAAGTCGTAACAAGGTTTCC
112	3282f38b567b98353607d60a96fa6368	OTU_112	133	3316	10	GTCGCTACTACCGATTGAACGTTTTAGTGAGGTATTTGGACGAGGCCTTTCGAGGTTTTTAATCTCGATCGTTGCCTTGGAAGACTCCCAAACTTGAGCGTTTAGAGGAAGTAAAAGTCGTAACAAGGTTTCT
113	b9931d30b68f8ef239180ae566e49905	OTU_113	136	3310	4	GTCGCTAGTACCGACTAGTTGGTTTAGTGAATCACATGGAGTTGCGATAGCTGTCGGGGCAACCTGGCACTTTACGCGGCAAAGTCTGGTAAACTTGATCAACCGGAGGAACTAAAAGTCGTAACAAGGTCTCCGT
114	f214cd63f64bf7e2f0675272b5859eed	OTU_114	132	3278	22	GTCGCTACTACCGATTGAATGGCTCGGTGAGGCCTTCGGACTGGCCCAGGGAGGTCGGCAACGACCACCCAGGGCCGGAAAGTTGGTCAAACCCGGTCATTTAGAGGAAGTAAAAGTCGTAACAAGGTCTCC
115	e0978f0d21eed94eeb18ad2be230e054	OTU_115	131	3272	3	GTCGCTACTACTGATTGGATGGTTAAGCAAGATCTCCAGAAGCTTGCAGCTTTGATTTCGTATTGAAGCAGTGAGTAGAAGGAGATCAAGCTTATTTGTCTAGAGGAAGTAAAAGTCGTAACAAGGTTTCC
116	25c6a1557ad98f6bdf85566c5bd3e72c	OTU_116	131	3222	25	CCGTCGCTCCTACCGATTGAGTGATCCGGTGAATAATTCGGACTGCGACAGTGTTCAGTTCCTGAACGTTGACGCGGAAAGTTTAGTAAACCTTATCACTTAGAGGAAGGAGAAGTCGTAACAAGGTTTCC
117	292a02925111a65e53fa10d1dc4d52a5	OTU_117	145	3220	7	GTCACACTATGAAAGTGAATCGTATTCAAAGAAATTGTTCTTTTTTTTACCTATATCACTTTTCCATTTATTTGTGTGATGTCGTACTTAAAAGATGTTTTTACAATTCTGTTTATGATTGTAGTGAAGTCGTAACAAGGTAGCT
118	c37bd9469e106d81a589b4a2fdc30778	OTU_118	132	3205	1	GTCGCTACTACCGATTGAATGGTTTAGTGAGGTTATTGGACTGGTAATATTGAGTTGGTAACTTCTCGATGTTTCTGGGAAGATAATCAAACTTGATTATTTAGAGGAAGTAAAAGTCGTAACAAGGTTTTC
119	afa8ebb854c6f59e664ce31adb09f32b	OTU_119	132	3188	5	GTCGCTACTACCGATTGAATGGCTTGGTGAGGCCTTCGGACTGGCTCCAGGGGGTTGGCAACGACCCCCCAGAGCCGGAAAGTTGGTCAAACCTGGTCATTTAGAGGAAGTAAAAGTCGTAACAAGGTTTCC
120	cf237ec393f28a0f1a8781ee2002361e	OTU_120	104	3172	8	GTCGTTTCTTCCGACTGATACTCATTGTGAATTACGAGGAGGGTCCGCCTAAATCGTTGTAAATGCTGGGTATTGGAGGAAGAAAAAGTCGTAACAAGGTTATC
121	aa8fa2fcf0ce38ddaae09be11a263876	OTU_121	104	3166	14	GTCATACCATGGGAGTGGGTTGCACCAGAAGTGGCTAGTCTAACTTCGGAGGACGGTCACCACGGTGTGATTCATGACTGGGGTAAAGTCGTAACAAGGTAGCC
122	f96b8508558e997b77d4c1193d2cd70b	OTU_122	136	3149	9	GTCGCTACTACCGATTGGATGGTTTAGTGAGAACTTCGGATTGGGTCCGGCGCGGTCCTCACGGCTCGCGGCGGACATCGAGAAGTCGTTCAAGCCAAATTTTCTAGAGGAAGTAAAAGTCGTAACAAGGTTTCCG
123	3570a2dd74c3ea68669ab2763fdac53f	OTU_123	138	3095	6	GTCGCTACTACCGATCGGATGGTTTAGTGAGACCCTCGGACTGGTCCCGAGAGGGTGGGCAACTGCCCTTTCTGGTGTTGCCGGGAAGAAGGTCGAACTTGACTATCTAGAGGAAGTAAAAGTCGTAACAAGGTTTCC
124	1684f41a1a265b7bda977ed36be276df	OTU_124	132	3086	7	GTCGCTCCTACCGATTGAATGTGTTGGTGAGGAGTTCGGATTGGCAGTTAGTGGTGGTTCGCCACTGCTTGCAGCTGAGAAGTTCTCCAAACCGCCCCATTTAGAGGAAGGAGAAGTCGTAACAAGGTTTCC
125	a7dda8552dbfa2bb82f5243834d90f6e	OTU_125	131	3084	1	CGTCGCTCCTACCGATTGAATGGTCCGGTGAAGCCTCGAGATTGTGGTTAGTTTCCTTTATTGGATGTTAGCCGCGAGAACTTGTCTAAACCTTATCATTTAGAGGAAGGTGAAGTCGTAACAAGGTTTCC
126	a57d6ec08d34af420203d45a99b15d7b	OTU_126	136	3069	1	GTCGCTACTGCCGATTGAATGGTTTAGTGAGATCCTTGGATTGGCCCCGCCGCGTCTGGCGACGGTCGCGGCGGAGAGCCGAGAAGACGATCAAACTTGATCATTTAGAGGAAGTAAAAGTCGTAACAAGGTTTCC
127	4c8f952b0a8849de02bad30f37bec7bf	OTU_127	131	3051	21	CCGTCGCTCCTACCGATTGAGTGATCCGGTGAATAATTCGGACTGCTGCGGTGTCCAGTTCCTGGACCTGCTTGCGGAAAGTTTAGTGAACCTTATCACTTAGAGGAAGGAGAAGTCGTAACAAGGTTTCC
128	777fcd3e67121b1e8c11f1f3faf14bcf	OTU_128	132	2978	3	GTCGCTACTACCGATTGAATGGCTTAGTGAGGTCTCCGGATCGGCCTCGGGGAGCCGGCGACGGCACCCTGTCGCTGAGAAGCTGATCAAACTTGGTCATTTAGAGGAAGTAAAAGTCGTAACAAGGTTTCC
129	841ee0bd11e913f3b3a71dc2239bd5fa	OTU_129	107	2974	1	GTCAAGCCACGAAAGCGGGGGGCATCCGAAGTCGTCGAGCTAACCCTCTGGGAAGCAGACGCCGAAGATGAACTCTGTGATTGGGACTAAGTCGTAACAAGGTAGCT
130	9c745abb61c01676fc8bc4d8dd5bf060	OTU_130	132	2954	30	GTCGCTCCTACCGATTGAATGGTCCGGTGAAGCGTTCGGACTATGACTCTCTGACGGTTCGCCGTCTAAGTGTCGTGGGAAGTTCGTTGAACCTTATCATTTAGAGGAAGGAGAAGTCGTAACAAGGTTTCC
131	cf07ae5d599b7121784e7baff04b621b	OTU_131	136	2923	2	GTCGCTACTACCGATTGGATGGTTTAGTGAGATCCTCGGATTGGTCTCGACATGGTGGGCAACCTCCGCGTCGATGCGCCGAGAAGACGATCAAACTTGATCATCTAGAGGAAGTAAAAGTCGTAACAAGGTTTCC
132	046a2e6c1cbac607a55e0293f7fdcc38	OTU_132	106	2892	28	GTCACACCATGGGAGTTGGTTGCACCAGAAGTGGGTTGTTTAACCTTCGGGAGAACGCTTACAACGGTGTGGTCAATGACTGGGGTGAAGTCGTAACAAGGTAGCC
133	2e45c41bffe08b45bc59f22f369ec6ad	OTU_133	131	2887	3	CGTCGCTACTACCGATTGAACGTTTTAGTGAGGACCTCGGATTGTGTTTCAGTTGGCTCACGCTGACTGTTTTGCGAGAAGACGTCCAAACTGAAGCGTTTAGAGGAAGTAAAAGTCGTAACAAGGTTTCC
134	637073e653713f7f1f1eb5bb6f98b9b9	OTU_134	131	2869	1	CGTCGCACCTACCGATTGAGTGATCCGGTGAAGCCTCGGGATTGTGGCTTGTTTCCTTTATTGGAACCTTGCCGTGAGAACCTGTCTAAACCTTATCACTTAGAGGAAGGTGAAGTCGTAACAAGGTTTCT
135	1aa9e2ef771627ba62260bc52cf67a05	OTU_135	136	2854	3	GTCGCTACTACCGATTGAATGGTTTAGTGAGATCCTCGGATTGGACCCGTCTTGGAGGGCAACCTTCGAGACGGTGTGCCGAGAAGACGATCAAACTTGATCATTTAGAGGAAGTAAAAGTCGTAACAAGGTTTCC
136	131aed55d563361c22730eb1ffc9f3ff	OTU_136	128	2837	6	GTCGCTCCTACCGATTGAATGCTCAGGTGAGCCATTCGGACCTTCATCATGCCGGTTTCCGGTTTTGATGAGGGAAAGTCTTGCGAACCTTATCATTTAGAGGAAGGAGAAGTCGTAACAAGGTTTCC
137	599acc362ec14e2ff9750d9a63ee9297	OTU_137	136	2825	6	GTCGCTACTACCGATTGAATGGTTTAGTGAGGTCCTCGGATTGACCCCTCTGTGATCGGCAACGGTTGCGGAGGCGTGTTGAAAAGATGATCGAACTTGATCATTTAGAGGAAGTAAAAGTCGTAACAAGGTTTCC
138	e3f6187b3d8bc92789e002c4d4631567	OTU_138	131	2820	1	CCGTCGCTTCTACCGATTGAATGATCCGGTGAATAATTTGGACTGCAGCAATGCTTGGATCCCGAATGTTGCAGCGGAAAGTTTAGTGAACCTTATCACTTAGAGGAAGGAGAAGTCGTAACAAGGTTTCC
139	72e5c2936daf8a249271790e32ec5116	OTU_139	128	2754	23	GTCGCTCCTACCGATTGAATGCTCAGGTGAGCCATTCGGACTTTCATCATGTCGGTTTCCGATTTTGATGAAGGAAAGTCTTGCGAACCTTATCATTTAGAGGAAGGAGAAGTCGTAACAAGGTTTCC
140	70336b93e428d2326affe50c1bd1b559	OTU_140	131	2747	10	CCGTCGCTCCTACCGATTGAGTGATCCGGTGAATAATTCGGACTGCAGCAATGTTCAGCTCCTGAATGTTGCAGTGGAAAGTTTAGTGAACCTTATCACTTAGAGGAAGGAGAAGTCGTAACAAGGTTTCC
141	7bf3395a832cfcc18138874a7851b30c	OTU_141	128	2681	20	GTCGCTCCTACCGATTGGATGAATCGATGAGCCGTTTGGAGAGAGACGATGAAGCTTCGGTGGATCCGTTTTTCGAAATTCTGCAAATCTGTTCATCTAGAGGAAGGAGAAGTCGTAACAAGGTTTCC
142	b66c546b58a24b04ba2669a9a1149234	OTU_142	102	2660	27	GTCAAACCATCTTAGTTGGGGGTGGGTGAGGCTACCTTATCTTCGGATTGGGGTATTCGAGCCTGCCTTCGACAAGGAGGGTTAAGTCGTAACAAGGTATCT
143	cd0fddf8559170ad4baa0baa46f4db4a	OTU_143	136	2659	3	GTCGCTACTACCGATTGAATGGTTTAGTGAGACCCTCGGATTCGTCCCAGCAGGGTGGGTTTCCACAAGGCTGGTGTGCGGAGAAGACGGTCGAACTTGATCATTTAGAGGAAGTAAAAGTCGTAACAAGGTTTCC
144	0f9cca677bf9f05d500338e4344356af	OTU_144	131	2655	25	CCGTCGCTCCTACCGATTGAGTGCTCAGGTGAATAGTATGGACTGCATCAGTGTTCGGTCTCCGAATGTTGAAGCGAGAAATTCTGTGAATCTTATTGCTTAGAGGAAGGAGAAGTCGTAACAAGGTTTTC
145	a4660a2e5301c2acd9ec3568445a1aa4	OTU_145	136	2642	6	GTCGCTACTACCGATTGGATGGTTTAGTGAGACCCTCGGATTGGTCCCGACATGGTGGGCAACCGCCGGGTCGTGGCGCCGAAAAGACGGTCAAACTTGACTATCTAGAGGAAGTAAAAGTCGTAACAAGGTTTCC
146	3ed3600989372665b604e5c9545c73e8	OTU_146	131	2594	8	CGTCGCTACTACCGATTGAACGTTTTAGTGAGGTCCTCGGACTGTGAGCCTGGCGGGTAACTCTGCCTGGTCTGCGGGAAGACGACCAAACTGTAGCGTTTAGAGGAAGTAAAAGTCGTAACAAGGTTTCC
147	e3292d6eb99a56d273ec275dc9ca7671	OTU_147	127	2576	10	GTCGCTCCTACCGATTGAGTGATCCGGTGAATACTTCGGAGTGCAGACTCTACAGTTTCTGTTTTGTTTGCGCAAAGTTGAATAAACCTTATCACTTAGAGGAAGGAGAAGTCGTAACAAGGTTTCC
148	480e11709b2728e65572ffe4601cb70b	OTU_148	124	2556	13	GTCGCTCCTACCGATTGGATGATCCGGTGAATACTTCGGAGTGCCCTTGTGTCTTCGGACGCTTGGGTGCAAAGTTGAGTGAACCTTATCATCTAGAGGAAGGAGAAGTCGTAACAAGGTTTCC
149	b4516dbe0130f4ff53180fe7f7e1c4dd	OTU_149	131	2542	18	CCGTCGCTCCTACCGATTGAGTGATCCGGTGAATAATTCGGACTGCAGTCGTGTTCAGTTCCTGAACGTGGCAGCGGAAAGTTTAGTGAACCTTATCACTTAGAGGAAGGAGAAGTCGTAACAAGGTTTCC
150	9914d1d30791373678ba36618327d74f	OTU_150	106	2537	20	GTCACACCATGGGAGTGGGTTGCTCCAGAAGTAGCTAGTCTAACCGCAAGGGGGACGGTTACCACGGAGTGATTCATGACTGGGGTGAAGTCGTAACAAGGTAGCC
151	1e5ce0ed51e3d827258d456f9a1d9445	OTU_151	131	2536	9	CCGTCGCTCCTACCGATTGAGTGTTCCGGTGAATAATTCGGACTGCAGCAGTGTTCGGTTCCTGAACGTTGCAGCGGAAAGTTTAGTGAACCTTAACACTTAGAGGAAGGAGAAGTCGTAACAAGGTTTCC
152	363727d815f898929e21efc0f4c3a704	OTU_152	131	2530	18	GTCGCTACTACCGATTGGATGGTCTGGTGAGTCTTTCGGACTGCGGCTCTGGCTCGGGCAACCGGGCCTTGCTGCGGGAAGTTACGCAAACCCTATCATCTAGAGGAAGTAAAAGTCGTAACAAGGTTTCC
153	ff93b0d03d4e3063bb9cc1dcc6ff8a5e	OTU_153	132	2500	3	GTCGCTACTACCGATTGAACGTTTTAGTGAGGTATTTGGACTGGACCTTCGGAGGTTAACGCCTCCGTTGCTGTTCGGGAAGACTCCCAAACTTGAGCGTTTAGAGGAAGTAAAAGTCGTAACAAGGTTTCC
154	353ae7bd38c1a57cfdf82f01a4adf76f	OTU_154	128	2484	25	GTCGCACCTACCGATTGAATGTTTCGGTGAAGATTCCGGATAGGACTTTTTTGATTTATTTCAATTTTGTCTTAAAAGCTATCTAAACCTCAACATTTAGAGGAAGGTGAAGTCGTAACAAGGTTTCC
155	22a6432bbb6e7c253dc68ed6000602e6	OTU_155	131	2442	3	CCGTCGCTCCTACCGATTGAATGATCCGGTAAATAATTCAGGTCATTGCTGGGATTAGGAAACTAACATTGCATTGGGAAGTATTGTAAACCTTATCACTTAGAGGAAGGAGAAGTCGTAACAAGGTTTCC
156	1b6fc72ec7cdd5234f31dc073191e8bb	OTU_156	136	2439	2	GTCGCTACTACCGATTGAATGGTTTAGTGAGATCCTCGGATTGGTCCCGTATTGGAGGGCAACCTTCGAGACGGTGCGCCGAGAAGACGATCAAACTTGATCATTTAGAGGAAGTAAAAGTCGTAACAAGGTTTCC
157	1df7c7230b01e01365fe8c22c50e9323	OTU_157	133	2417	24	GTCGCTACTACCGATTGAGCATTAGGGTGAAATCTTCGGACCGTGGCATACTTCTGGCTTAGCCAGTCTTTGTCCGTGGGAGGTCGCTTAAATCCTGATGCTTAGAGGAAGTAAAAGTCGTAACAAGGTTTCC
158	fe732fec8b5b4d346453d34feeb0be0c	OTU_158	132	2400	1	GTCGCTACTACCGATTGAACGTTTTAGTGAGGTATTTGGATTGGACCTCCGGCGATTTATTTCTCTGGTGCTGTCCGAGAAGACTCCCAAACTTGAGCGTTTAGAGGAAGTAAAAGTCGTAACAAGGTTTCC
159	645c96442f37330bc32a2963aec3d86b	OTU_159	136	2395	7	GTCGCTACTACCGATTGGATGGCTTAATGAGAACTCTGGATCTCTGCCGGCGCGGTCCTCGCGGGTCGCGTTGGATGGGGAGAAGTTGTTCAAATTGAGTCTTCTAGAGGAAGTAAAAGTCGTAACAAGGTTTCCG
160	8681aff09ad4cf09b32cd0acd2864f0b	OTU_160	136	2355	19	GTCGCTCCTACCGATTGAATGATTCGATGAAATTTTCGGAGAATGTCTTTGGGTTTGGTTTTCCAGACTAAAAGCTGTTCGAAGTTACTTAAATCTGATCATTTAGAGGAAGGAGAAGTCGTAACAAGGTTTCCGT
161	af21d97d96cd65af26bc355b72107fd9	OTU_161	126	2323	18	GTCGCACCTACCGATTGAATGATTCGGTGAAATCTCGGGACCGTGGATGTTGCCTCCCGGCACTTTCCGCGGGAACTTGCTTAAACCTCATCATTTAGAGGAAGGTGAAGTCGTAACAAGGTTTCC
162	573e766a026a45abcee13bffb13819e5	OTU_162	106	2322	1	GTCACACCACGAAAGTCGGTTGTTCCAGAAGTAGTTGAGCTAACCTTCGGGAGGCAGGCTACCAAGGAATGGCTGGTAATTGGGGTGAAGTCGTAACAAGGTATCT
163	46a7445d5c84381832d5e4c623e3605a	OTU_163	132	2307	3	GTCGCACCTACCGATTGAATGGTCCGGTGAAATTTTCGGACCGTGACAATGTCACCTTCATTGGAGACGCTGTCATGGGAAGTTACTTAAACCTTACCATTTAGAGGAAGGTGAAGTCGTAACAAGGTTTCC
164	0c21acac4063e4cfe181590bc8eb11fe	OTU_164	131	2285	8	CCGTCGCTCCTACCGATTGAGTGATCCGGTGAATAATTCGGACTGCAGCAGTGTTCAGTCCCTGAACGTTGCAGCGGAAAGTTTAGTGAACCTTATCACTTAGAGGAAGGAGAAGTCGTAACAAGGTTTCC
165	ff5e9218c35a7ab7f7c3e2934f5bdffa	OTU_165	128	2271	2	GTCGCACCTACCGATTGAATGGTCCGGTGAAGCCTCGAGATTGTGACTGTCGCCTTTATTGGTGTCGGTCACGAGAACTTGTCTAAACCTTATCATTTAGAGGAAGGTGAAGTCGTAACAAGGTTTCC
166	5f7e2658e7ab9413de2bf08a815f8c47	OTU_166	128	2262	18	GTCGCTCCTACCGATTGAATGCTCAGGTGAGCCATTCGGACCTCCTTCGTGCCAGTTTCTGGTTTCGCTGGAGGAAAGTCTTGCGAACCTTATCATTTAGAGGAAGGAGAAGTCGTAACAAGGTTTCC
167	3a78dd323a6cb3328636f6b777791d52	OTU_167	131	2258	22	CGTCGCACCTACCGATTGAATGGTCCGGTGAAATTCTCGGACGCGGACTTGCGATGTTAATTCGGAGCTTGACTGTGAAAGTTAATTAAACCTTACCATTTAGAGGAAGGTGAAGTCGTAACAAGGTTTCC
168	f842cb47d68db70d167d3580c11023a5	OTU_168	136	2256	2	GTCGCTACTACCGATTGGATGGTTTAGTGAGATCCTCGGATTGGTCCTGGCACGGTGGGCAACTGCCTTGCCATGGCGCCGAGAAGACGATCGAACTTGATCATCTAGAGGAAGTAAAAGTCGTAACAAGGTTTCC
169	1f8d0dcf432a407186dcb8b3a76fab99	OTU_169	127	2256	14	GTCGCTCCTACCGATTGAATGTTCCGGTGAATACTTCGGACTGCGAGGTCTGCAGTTTCTGCGTTCCTTGCGGAAAGTTGAATAAACCTTAACATTTAGAGGAAGGAGAAGTCGTAACAAGGTTTCC
170	c9f6341bea6e5cb314de37dc7506701d	OTU_170	106	2228	28	GTCACACCATGGGAGTTGGTTTTACCTGAAGCTGGTTCGCTAACCGTAAGGAGGCAGCCAACCACGGTAAGATTAGCGACTGGGGTGAAGTCGTAACAAGGTAACC
171	5c54c6f4578c5940a61be766caed3105	OTU_171	104	2224	24	GTCACACCATGGGAGTTGGTTTTACCCGAAGGCGATGTGCTAACTTCGGAGGCAGTCGACCACGGTAAGGTCAGCGACTGGGGTGAAGTCGTAACAAGGTAGCC
172	389ba1c56b6afdccc3f624a36f2552fa	OTU_172	132	2215	21	GTCGCACCTACCGATTGAATGGTCCGGTGAAATCTTCGGATCTGAGAGATGTCTGATTAATTTCGGACGCCTTTTGGAAAAGTTGCTTAAACCTTACCATTTAGAGGAAGGTGAAGTCGTAACAAGGTTTCC
173	14a018aed44dbed07b29335b17143298	OTU_173	127	2181	21	GTCGCTCCTACCGATTGGATGATCCGGTGAGCTATTCGGACCTCCACTTTATTGATTTTCAATTTTGTGAGGGAAAGTCTCGCGAACCTTATCATCTAGAGGAAGGAGAAGTCGTAACAAGGTTTCC
174	d5374d4685f394b5980ba7c1164f2ad2	OTU_174	136	2170	15	GTCGCTCCTACCGATTGGATGAATCGATGAGCCTTTCGGAGGAAAGTCGAGAAACCACTTCGGTGGTGGATCTTCAGTCCAAAGTCATGCAAATCTGTTCATCTAGAGGAAGGAGAAGTCGTAACAAGGTTTCCGT
175	c26f02ce7bfe66ee9493593a9dce124c	OTU_175	133	2160	12	GTCGCTCCTACCGATTGGGTGATTCGGTGAGCTCTTGGGATCGCTTGATTTGTTTCTCGTTAAGAGATCTTTTCATTGAAAACTTGATCAAACCTAATCACCTAGAGGAAGGAGAAGTCGTAACAAGGTTTCC
176	608b6c9ec8b8a758ad1caa95b95ddc8e	OTU_176	136	2155	1	GTCGCTACTACCGATTGGATGATTTAGTGAGGCCTTTGGACTGGCCGCTTGTGGGGCACTTGTGTCCCGCTGGTGGCATGGAAAGATGGTCAAACTGTATCATCTAGAGGAAGTAAAAGTCGTAACAAGGTTTCCG
177	f154607f18e0c2eecbc008e7fc450317	OTU_177	137	2154	3	GTCGCTACTACCGATTGAATGGTTTAGTGAGACCCTCGGATTCGTCCCAGCAGGGTGGGTTTCCACACCGGCTGGTGTGCGGAGAAGACGGTCGAACTTGATCATTTAGAGGAAGTAAAAGTCGTAACAAGGTTTCC
178	58dfb6b38c1233f224f61aa3075a6652	OTU_178	133	2152	2	GTCGCTACTACCGATTGAATGTATTAGTGAGATCCATGGACGGCTACAGGCAAGCTTTGACGAGCTAGTCGCGTGGCTGGAAGTCGATCAAGCTGATGCATTTAGAGGAAGTAAAAGTCGTAACAAGGTTTCC
179	40f04b1c0eee8d09e056ecdc31d9e2fe	OTU_179	131	2139	4	CGTCGCACCTACCGATTGAATGGTCCGGTGAAGCCTCGGGATTGTGGCTAGTTCCCTTCATTGGGAGTTTGTCGCGAGAACTTGTCTAAACCTTATCATTTAGAGGAAGGTGAAGTCGTAACAAGGTTTCC
180	0cf87b496de8585dc8dec8de8f1fc76e	OTU_180	131	2103	13	CCGTCGCTCCTACCGATTGAGTGATCCGGTGAATAATTCGGACTGCAGCAGTGTTCAGTTCCTGAACGTTGCCGCGGAAAGTCTAGTGAACCTTATCACTTAGAGGAAGGAGAAGTCGTAACAAGGTTTCC
181	0970fbc5e12183ed74e46732244711a2	OTU_181	106	2083	24	GTCACACCATGGGAGTTGGTTTTACCCGAAGACGATATCCTAACCTTTTGGAGGGAGTCGGCCACGGTAGGGTCAGCGACTGGGGTGAAGTCGTAACAAGGTAGCC
182	4f98963b63fdf02be5ee37e5e20b0630	OTU_182	136	2079	18	GTCGCTACTACCGATTGAATGGTTTAGTGAGAATTTTGGACTGGAGCTTTCTTGTTCAGCAATGAACGAGAGAGAGTCCGGGAAGTCATTCTAACTGTATCATTTAGAGGAAGTAAAAGTCGTAACAAGGTTTCCG
183	f4315a7a15b0530cc7223f6882a3510d	OTU_183	131	2062	20	GTCGCTCCTACCGATTGAATGGTCCGGTGAAATCTTCGGATTGCTGGATAGGACTTGGCAACTTGACCTATCTGCGAGAAGTTGCTTGAACCTTATCATTTAGAGGAAGGAGAAGTCGTAACAAGGTTTCC
184	cccb4667f9bd6ba7ac19cc8ecf823e69	OTU_184	136	2055	1	GTCGCTACTACCGATTGGATGGTTTAGTGAGGTCCTCGGATCGGCCCCGCCGGAGTCGGTCACGGCCCTGGCGGAGCGCCGAGAAGACGATCAAACTTGACTATCTAGAGGAAGTAAAAGTCGTAACAAGGTTTCC
185	9b4227ba37427faa685aa324577ac6f8	OTU_185	132	2052	1	GTCGCTACTACCGATTGAATGGCTTAGTGAGGTCTCCGGATTGGCTTTGGGGAGCCGGCAACGGCACCCTATTGCTGGGAAGCTGATCAAACTTGGTCATTTAGAGGAAGTAAAAGTCGTAACAAGGTTTCC
186	1e8d8aacdb853eeb9597ea7671da97d9	OTU_186	133	2047	16	GTCGCTCCTACCGATTGAATAATCCGGTGAGCTTTTTGGACCCTAGCAACGGCTTTGGTTCGCCAAACTGATGCTGGGGGAAGATACGCAAACCTTATTATTTAGAGGAAGGAGAAGTCGTAACAAGGTTTCC
187	8d6ea2130b635720b7b5acabcb363c63	OTU_187	132	2032	16	GTCGCACCTACCGATTGAATGGTCCGGTGAAATCTTCGGATCTGAGAGATGTTGGATTAATTTCTGACGCCTTTTAGAAAAGTCGCTTAAACCTTATCATTTAGAGGAAGGTGAAGTCGTAACAAGGTTTCC
188	bf6f45c7b294d3e81d3ff236aff3de19	OTU_188	106	2012	25	GTCACACCATGGGAGTTGGCTTTACCTGAAGCCGGTGCGCTAACCGCAAGGAAGCAGCCGACCACGGTCAGGTCAGCGACTGGGGTGAAGTCGTAACAAGGTAGCT
189	4ff83ffd50a9529c376fa50f93cc9d4f	OTU_189	119	2008	8	GTCGCTACTACCGATCGAACGGTTTAGTGAGGCCTTTTGACTCGCACTCGCTCGTCGTGTTCGGGAAAGCCGGTCGAACTTGATCGTTTAGAGGAAGTAAAAGTCGTAACAAGGTTTCC
190	612212c787f27ed2467d0f772964c1f5	OTU_190	131	2000	20	CCGTCGCTCCTACCGATTGGATGATCCGGTGAATAATTCGGACTGCGGACTTGCTCGGTTTCCGAGCTCGTCTGCGGGAAGTTTAGTGAACCTTATCATCTAGAGGAAGGAGAAGTCGTAACAAGGTTTCC
191	de720d3102e2c6a7f07b90a6f12ad6f4	OTU_191	131	1994	23	CGTCGCTCCTACCGATTGAATGGTCCGGTGAAATCTTCGGATTACCAAACGGAAAGTTTCGGCTTACCGTTTGGTGAAAAGTTGATTAAACCTTATCATTTAGAGGAAGGAGAAGTCGTAACAAGGTTTCC
192	63089b182f46dbd3eb26cae8d0f7fad0	OTU_192	131	1961	16	CCGTCGCTCCTACCGATTGAGTGATCCGGTGAATAATTCGGACCGCCACAATGTTCAGATCCTGAACGTTGCAGCGGAAAGTTTAGTGAACCTTATCACTTAGAGGAAGGAGAAGTCGTAACAAGGTTTCC
193	e1b1cc8501036b6977cc54919aca6561	OTU_193	128	1894	28	GTCGCACCTACCGATTGAATGTTTCGGTGAAGATTCCGGATAGGACTGATTTGATTTATTTCATTTCTGACCTAAAAGCTATCTAAACCTCAACATTTAGAGGAAGGTGAAGTCGTAACAAGGTTTCC
194	0587559f190404186b55b5ac53aedf9f	OTU_194	106	1889	32	GTCAAGCCACGAAAGTGGGGGGCATCCGAAGTCGCTGAGGTAACCGCAAGGAGCCAGGCGCCGAAGATGAACTCTGCAATTGGGACTAAGTCGTAACAAGGTAGCC
195	16270d3267c8b27bddb83c000dc9a024	OTU_195	127	1888	3	GTCGCTCCTACCGATTGAGTGATCCGGTGAGTCCTTTAGAGTGTGTTGCATTTAGTTTCTATTCGTGACGTGTGAAGTTGAACAAACCTTATCACTTAGAGGAAGGAGAAGTCGTAACAAGGTTTCC
196	8df8c70153c8a93042f77f6f4f8463fa	OTU_196	131	1868	1	CGTCGCTACTACCGATTGAATGTTTTAGTGAGGTATTTGGATCGGCGCTTGAGAGGTTAACGCCTTTCTTGTGCTGAGAAGACTCCCAAACTTGAGCATTTAGAGGAAGTAAAAGTCGTAACAAGGTTTCC
197	90d91b6e56869a6278bb8a7eb158ca99	OTU_197	136	1867	21	GTCGCTCCTACCGATTGAATGATCCGGTGAGGCCCCCGGACTGCGACAACTTAGACGGTTCGCCGTCCGAGATGCTGCGGGAAGCTGTCCAAACCTTATCATTTAGAGGAAGGAGAAGTCGTAACAAGGTTTCCGT
198	ecfd4b0e29c720a8c8186f5109eb1cb3	OTU_198	106	1863	2	GTCACACCATGGGAGTTGGTTTTACCCGAAGCCGGTGCGCTAACCTTAGGGAAGCAGCCGACCACGGTGAGGTCAGCGACTGGGGTGAAGTCGTAACAAGGTAGCC
199	5f9b54ea105d158b6384c3769867a895	OTU_199	131	1861	27	CGTCGCACCTACCGATTGAATGGTCCGGTGAGGACTCGGGATTGTGGTTTAGCTCCTTCATTGGGGCCTGACTGCGAGAACTTGTCCGAACCTTATCATTTAGAGGAAGGTGAAGTCGTAACAAGGTTTCC
200	cce20ccfc82132be4e1bb1caea9bf081	OTU_200	131	1855	19	CCGTCGCTCCTACCGATTGAGTGATCCGGTGAGTAATTCGGACTGCAGCAGTGTTCAGTTCCTGAACGTTGCAGCGGAAAGTTTAGCAAACCTTATCACTTAGAGGAAGGAGAAGTCGTAACAAGGTTTCC
201	fc88b051e63b53998605701c74f07563	OTU_201	132	1855	28	GTCGCTCCTACCGATTGAATGGTCCGGTGAAGCGCTCGGACCGCGGCCTCTTGACGGGTCTCCGTCGATTGGCTGTGGGAAGTTCGTTAAACCTTATCATTTAGAGGAAGGAGAAGTCGTAACAAGGTTTCC
202	345a52127059ae2b9bfab094ab31a2d1	OTU_202	103	1852	24	GTCGTTTCTTCCGACTGGTACTCATTGTGAATTGCGAGGAGATCTTTTCAAATCGTTGTAAATGCTGGGTATTGGAGGAAGAAAAAGTCGTAACAAGGTTATC
203	a9ee1596738966d4631c445a43a078d2	OTU_203	136	1852	2	GTCGCTACTACCGATTGAATGGTTTAGTGAGATCCTCGGATTGGTCCTAGCATGGTGGGCAACCACCGGGCTAGTGTGCCGAGAAGACGATCAAACTTGATCATTTAGAGGAAGTAAAAGTCGTAACAAGGTTTCC
204	4ed99c1b16ad9790231bdc77c28430d0	OTU_204	136	1851	3	GTCGCTACTACCGATTGAATGGTTTAGTGAGATCCTCGGATTGCGCTCGTCGGGGAAGGCAACTTTTCCGACGTTGTGCGAGAAGACGATCAAACTTGATCATTTAGAGGAAGTAAAAGTCGTAACAAGGTTTCCG
205	60f2b95a297b0f580fe669ceef82ff91	OTU_205	131	1850	16	CCGTCGCTTCTACCGATTGAGTGATCCGGTGAATAATTCGGACTGCTGTTTTCTCTGGTTCGCCAGAATTACGGTGGGAAGTTTCGTGAACCTTATCACTTAGAGGAAGAAGAAGTCGTAACAAGGTTTCC
206	dc8599c628d6ac13f1cb8388ddb18308	OTU_206	132	1843	5	GTCGCACCTACCGATTGAATGGTCCGGTGAAGTTTTCGGACCGTCGCAATGTCACCTTTACCGGAGACGTTGTGATGGGAAGTTACCTAAACCTTACCATTTAGAGGAAGGTGAAGTCGTAACAAGGTTTCC
207	b4cbfe1715043fbeb3448d6312d3b5fe	OTU_207	104	1839	10	GTCGTTTCTTCCGACTGATACTCATTGTGAATTACGAGGATGGGTTTCCAAAATCGTTGTAAATGCTGGGTATTGGAGGAAGAAAAAGTCGTAACAAGGTTATC
208	ed8bc7ac49898fccb4b8f5a56737ac6d	OTU_208	136	1830	2	GTCGCTACTACCGATTGAACGTTTTAGTGAGGTATTTGGACTGGGCCTGGCCGGGTTCGCGCTCGGCCAGCTTTGCCCGGGAAGACTCCCGAACTTGAGCGTTTAGAGGAAGTAAAAGTCGTAACAAGGTTTCCGT
209	5214ed4cdcbac75ab9c778cd37ef5f23	OTU_209	131	1818	7	CCGTCGCTCCTACCGATTGAGTGATCCGGTGAATAATTCGGACTGCAGCAGTGTTTAGTTCCTGAACGTTGCAGCGGAAAGTTTAGTGAACCTTATCACTTAGAGGAAGGAGAAGTCGTAACAAGGTTTCC
210	f04499dcf2827b906b5ab8b8740df34b	OTU_210	104	1813	17	GTCGTTTCTTTCGACTGATACTCATTGTGAATTGCGGGGAGATTTCGATTAAACCGTTGTGAATGCTGGGTATTGGAGAAAGAAAAAGTCGTAACAAGGTTATC
211	23d20d86a58ff25cf324316e3d61e9ba	OTU_211	116	1796	24	GTCGTTGTTTCCGATGATGGTGCAATACAGGTGATCGGATGGATGGGTGTCTCACCTGTCCCGAAGTTCACCGATATTTCTTCAATAGAGGAAGCAAAAGTCGTAACAAGGTAGCT
212	ccc028af683da1de5cf0a747631a546f	OTU_212	116	1764	3	GTCGCTCCTACCGATTGGGTGAGCCGATGAAACTCTCGGATGTAGACTATTCATAGTCCGCAGAAGAGATTTGAATCGTAGCGCTTAGAGGAAGGAGAAGTCGTAACAAGGTTTTC
213	f45c453fbe18d144d37f677d09080051	OTU_213	136	1749	3	GTCGCTACTACCGATTGGATGGTTTAGTGAGACCCTCGGATTGGTCCCGACATGGCTGGCAACAGCCGGGTCGTGGCGCCGAGAAGACGGTCAAACTTGACTATCTAGAGGAAGTAAAAGTCGTAACAAGGTTTCC
214	edc662fdd86c10808685847a70e609a6	OTU_214	168	1748	10	ACAGTGACACTTACTCCTCAAGCCGAGGGGAACGATAATACCCCCACTATATCGGGAACAACTGATGCATCGACAACCGATGATATCGTTATCACGATCATTGATAGTCAAGGTGAGCAACAAACGATTATTACTAATGCCGATGAAAACGGAAATTTCAGCGTTGAT
215	af91269e21ce8353156342284a4f3ae8	OTU_215	133	1736	3	GTCGCTACTACCGATTGAATGGTTTAGCGAGAACCTCGGATTGAGCCCATTCCGTGCGCAAGCATGGCTGCGGGTTTGAAAAGAAGTTCAAGCTTGATCATTTAGAGGAAGTAAAAGTCGTAACAAGGTTTTC
216	8dd28efa6070a22dbbf83726c33b30df	OTU_216	106	1718	1	GTCACACCACGAAAGTTGAATTGACCCGAAGTCGTGTGCCTAACCTTTTGGAGGGAAGCGCCTACGGTTGATTCGATGATTGGGGTGAAGTCGTAACAAGGTAGCT
217	5b6220787e5f1b9e24716447d13d1276	OTU_217	147	1710	3	GTCGCTACTACCGATTGAACGGTTTAGTGAGATCTTCGGATCGGCACGCGGCGGGGACCGGTATTTCGCGTGCCGGCCTCGCTCGCGCGCCGAGAAGACGATCGAACTTGATCGTTTAGAGGAAGTAAAAGTCGTAACAAGGTTTCC
218	346507f63ae81bd6ec37c38fd9cdb633	OTU_218	131	1704	5	GTCGCACCTACCGATTGAATGGTCCGGTGAAATTTTCGGACCGTGACAATGTCACCTTAATTGGGACGCTGTCATGGGAAGTTACTTAAACCTTACCATTTAGAGGAAGGTGAAGTCGTAACAAGGTTTCC
219	3cf1ac2ac9d455726bd74c9234deab84	OTU_219	131	1687	8	CGTCGCACCTACCGATTGAGTGTTCCGGTGAAGCCTCGGGATTGTAGTTGGCTTCCTTTATTGGATGCTGTCCGCGAGAACTTGTCTAAACCTTATCACTTAGAGGAAGGTGAAGTCGTAACAAGGTTTCC
220	deb817855ccf2aecee02af9fbbbc65e0	OTU_220	131	1682	2	CGTCGCTACTACCGATTGGGTGTTTTAGTGAGATCCTCGGACCGTTTGCCTTGTGGCTAACGCTGCTTGGCTAACAGAAAGACGATCAAACTGTAGCACCTAGAGGAAGTAAAAGTCGTAACAAGGTTTCC
221	85cc4a13e2dc9f71b7f2178fe0450605	OTU_221	120	1670	2	GTCGCTACTACCGATTTCGAGTGGTCCGGTGAGCCCTTCGGACCGGGGCCCTTCAGTGGGTCCTGGAAAGTCGTGCAAATCAAATCACTTAGAGGAAGTAAAAGTCGTAACAAGGTTTCC
222	9c32d493fb534376cfe621fd95e2373a	OTU_222	131	1655	1	GTCGCTACTACCGATTGAATGGCTTAGTGAGCATTTGGGATTGGCCGTCCGCACCGGCAACGGGAGCGGGTGGCCGAGAACTTATGCAAACTTGGTCATTTAGAGGAAGTAAAAGTCGTAACAAGGTTTCT
223	77e6a004a3327f28ee82c03b63a2f661	OTU_223	136	1650	6	GTCGCTACTACCGATTGAATGGCTTAGTGAAGTCTCCGGATTCGCGCCGCCGTGAGCGGCGACGCTCGTGGCGGATGCGGAGAAGCTGATTGAACTGTGTCATTTAGAGGAAGTAAAAGTCGTAACAAGGTTTCCG
224	a94bcc231c31e5d8a5940ce32ff552e7	OTU_224	128	1641	5	GTCGCACCTACCGATTGGATGGTCCGGTGAAGCCTCGGGATTGTTGCTATTACCTTTACTGGTGCTTGCTGCAAGAACTTGTCTAAACCTTATCATCTAGAGGAAGGTGAAGTCGTAACAAGGTTTCC
225	90a75b782c5be3f9b739d8c69590eda4	OTU_225	106	1641	13	GTCACACCATGGGAGTTGGATTCACTCGAAGGCGTTGAGCTAACCGCAAGGAGGCAGGCGACCACAGTGGGTTTAGCGACTGGGGTGAAGTCGTAACAAGGTAGCC
226	63b4f87fe3c23228eee8f784804feaca	OTU_226	140	1623	27	GTCACATAATGGGAGCGAGATCTGCACAAAGTATTGTATGGGTATATATACATATGTATATTTTGTTATGGATAAGATATATATTTTATAGGATAGCACTGTAGGTATTGTGACTGATATGAAGTCGTAACAAGGTAGCC
227	e24e39b22c8aa9227f9cb0b7d1af21b9	OTU_227	131	1618	3	CCGTCGCACCTACCGATTGAATGGTCCGGTGAAAACCTGGGATATTAGACACGTGCTTTTTAGGTATGTGTTTAGTAGAACTCGTTTAAACCTTATCATTTAGAGGAAGGTGAAGTCGTAACAAGGTTTCC
228	a20a59c8946e31e62772c8a0a1475b8d	OTU_228	131	1592	4	CCGTCGCACCTACCGATTGAATGGTCCGGTGAAGCCTCGGGATTGTGATGAGTTTCCTTTATTGGAGTTTGTCGCGAGAACTTGTCTAAACCTTATCATTTAGAGGAAGGTGAAGTCGTAACAAGGTTTCC
229	020645d3b0aa28447db962d09243df88	OTU_229	136	1590	2	GTCGCTACTACCGATTGGGTGTACCAGTGAGAGCCTTGGACTGGCGTCCGCTGCTCCTAACGGGGCAGTTGTGTCTGACGGAAAGAGGTTCGAACTGGTGCACCTAGAGGAAGTAAAAGTCGTAACAAGGTTTCCG
230	52f24303535ac5c9c100b01552d018ac	OTU_230	108	1587	2	GTCACATCACGAAAGTTGGCTGTACCCGAAGTCGCTGCGCTGACCCGCAAGGGAGGCAGGTGCCTAAGGTATGGTCGGCGATTGGGGTGAAGTCGTAACAAGGTAGCT
231	08282972630627e934a91345ca83d411	OTU_231	132	1563	8	GTCGCTACTACCGATTGAATGGCTCAGTGAGGTGTTCGGACTGGCCCAGGGAGGTCGGCAACGACCACCCAGGGCCGGAAAGTTCATCAAACTGAGTCATTTAGAGGAAGTAAAAGTCGTAACAAGGTCTCC
232	cb28a22af559e458cd6b5feedff1b260	OTU_232	131	1554	22	CGTCGCACCTACCGATTGAATGGTCCGGTGAAGACTCGGGATCGTGGCTTAGTTGCTTAATTGTGATTAGACCGTGAGAACCTGTCTAAACCTTATCATTTAGAGGAAGGTGAAGTCGTAACAAGGTTTCC
233	2f6dcce5402f69f104b3d8f08e99dc11	OTU_233	131	1553	17	CGTCGCACCTACCGATTGAATGGTTCGGTGAGATCTTTGGAACGCCTCGGCGCAACCGCAAGGGAGTGCCGAGGTGTGAAGCTGCTCAAACCTCACTATTTAGAGGAAGGTGAAGTCGTAACAAGGTTTCC
234	7f17aa43ef38fcf5c96c93a7d2f69bcf	OTU_234	124	1543	13	GTCGCTCCTACCGATTTCGAGTGGTCCGGTGAATCTTTCGGACTGCGCGCGGCCTCGAGTCGTGTCGCGGAAAGTCAGGTAAACCTTATCACTTAGAGGAAGGAGAAGTCGTAACAAGGTTTCC
235	aed5aa028a351e99690aafd367bae87f	OTU_235	136	1542	4	GTCGCTACTACCGATTGGATGGATTAATGAGAGCTCTGGATCTCTGCCGGCGCGGTCCTCACGGGTCGCGTTGGATAGGGAGAAGTTGTTCAAATTAATCTCTCTAGAGGAAGTAAAAGTCGTAACAAGGTTTCCG
236	ae2d0ece34e199855c057f5293157519	OTU_236	136	1538	5	GTCGCTACTACCGATTGAATGGTTTAGTGAGATTTTTGGACTGGAACTCTCTTGTTCAGCAATGAACGAGAGGGACTCTGGGAAGCTATTCTAACTGTATCATTTAGAGGAAGTAAAAGTCGTAACAAGGTTTCCG
237	0af202fda12799fcf5782503997b1295	OTU_237	136	1525	6	GTCGCTACTACCGATTGAATGATTTAGTGAGGACTTCAGATTTGCTGGTGGAGCTGTCTTTGGACGGCATCGCTGTGCGGAGAAGATGTCCAAACTTGCTCATTTAGAGGAAGTAAAAGTCGTAACAAGGTTTCCG
238	a1c6f869ca67f215e543826fc6f8ace3	OTU_238	106	1519	22	GTCACACCATGGGAATTGGTTTTACCCGAAGACTGTGTGCTAACCTTTTGGAGGCAGCAGGCCACGGTAAGATCAGTGACTGGGGTGAAGTCGTAACAAGGTAGCC
239	84b318b5b170e7e7ab176e85f23c7ef8	OTU_239	127	1517	20	GTCGCTCCTACCGATTGAATGTTCCGGTGAATACTTCGGACTGCGAGGTCTACAGTTTCTGTGTTCCTTGCGGAAAGTTGAATAAACCTTAACATTTAGAGGAAGGAGAAGTCGTAACAAGGTTTCC
240	ee2bf1c995c18544f9e1802dbd635245	OTU_240	131	1515	1	CGTCGCTACTACCGATTGAACATTTTAGTGAGATCCTCGGACTGTGAGCCTGGCGAGTCGCCCTGCCTGGTCTACAGGAAGACGACCAAACTGTAGTGTTTAGAGGAAGTAAAAGTCGTAACAAGGTTTCT
241	331ad55e0af513d147a2686e07606718	OTU_241	102	1495	6	GTCGTTTCTTTCGACTGATACTCATTGTGAATTACGGGGAGATTTTTCAAACCGTTGTGAATGCTGGGTATTGGAGAAAGAAAAAGTCGTAACAAGGTTATC
242	fd91c32e6ed729722459e73c4898e682	OTU_242	133	1489	4	GTCGCTACTACCGATTGGATCATTTGGTGAGGCCCACGGACTGTCGCGCTTCCTTCCCTGTGTTGGTTGCGCTTCTTGGGAAGTGGTACAAACCTGATGATCTAGAGGAAGTAAAAGTCGTAACAAGGTTTCC
243	7da105fe2a374611c0f2739817afc7f7	OTU_243	132	1486	5	GTCGCACCTACCGATTGAATGATTCGGTGAAAATTTCGGACCGTGTCGCCGCTTCCTTCATTGGGAATGGTGATGTGGGAAGTTATTTAAACCTCATCATTTAGAGGAAGGTGAAGTCGTAACAAGGTTTCC
244	d09daa5ff7958fa05a6a1ffc0fa92a41	OTU_244	131	1486	16	GTCGCTACTACCGATTGAATGGCTTAGTGAGCTTTCTGGACTGTTGCTTTTCGTTGGAAACTTCGTTAAGCATACGGGAAGGAAATCAAACTTGATCATTTAGAGGAAGTAAAAGTCGTAACAAGGTTTCC
245	340e7e986a205a64d2acaf45eab1d1a4	OTU_245	131	1475	1	CCGTCGCTCCTACCGATTGAGTGATCCGGTGAATAATTTGGACTGCAGCAGTGTTCAGTTCCTGAACGTTGCAGTGGAAAGTTTAGTGAACCTTATCACTTAGAGGAAGGAGAAGTCGTAACAAGGTTTCC
246	e2afc87aa04e052989fd54210e3f8514	OTU_246	131	1471	4	CGTCGCACCTACCGATTGAATGGTCCGGTGAAGCCTCGAGATTGTGGTTAGTTTCCTTTATTGGATGTTAACCACGAGAACTTGTCTAAACCTTATCATTTAGAGGAAGGTGAAGTCGTAACAAGGTTTCC
247	2e85cf339192597c9f3278c6d9252632	OTU_247	131	1464	1	GTCGCTACTACCGATTGAACGTTTTAGTGAGGCACTTGGATTGGAGCTCCGGGGCTTTACGGCCCTGGTGATTCCGAGAAGATTTCCAAACTTGAGCGTTTAGAGGAAGTAAAAGTCGTAACAAGGTTTCC
248	e34e5dcd60692e178fb799db5492ff15	OTU_248	198	1457	2	GCTGTTGAGTCATTGGAAGCAACCACTGCATCAATTTTATTAGCGTTTGCAGTGAGTCCGTTTTCCATAATGTTCAACGCAGCTTCAGCAGACCAGCCCATAGCCCATTGATCGCCTACAACTTTAATCTGTTTAGAATCGATCGCTGGTTGTAAGACATTCATTTGCCCCTGGCGAAACATCTTTGCATTGTTATCG
249	4ec99a5ceb6882c67b0d68ebff05c8a6	OTU_249	136	1434	4	GTCGCTACTACCGATTGAATGGTTTAGTGAGATCCTCGGATTGGTCCCGTTTTGGAGGGCAACCTTCGAGACGGTGCGCCGAGAAGACGATCAAACTTGATCATTTAGAGGAAGTAAAAGTCGTAACAAGGTTTCC
250	1d37747c078b233da95d831146e00f1c	OTU_250	106	1424	1	GTCACATCATGGAAGCCGGTCGCAAGCGAAGTGTATGCGCTAACCTTCGGGAAGCAATGCCCTAACTTGTAGCTGGTAACTGGGATGAAGTCGTAACAAGGTAGCC
251	32fa062f5a78ed0e5ae39abd1c36d6e9	OTU_251	113	1413	7	GTCGCTTGTAGTAACGAATGGTCTGGTGAACCTTCTGGACTGCGATAGCAATATTGCGGAAAAATAAGTAAACCCTACCATTTGGAACAACAAGAAGTCGTAACAAGGTATCT
252	89d76989aedd18c307c70ab4e947f5be	OTU_252	106	1406	3	GTCGTTTCTTCCGACTGATACTAATTGTGAGTTGCAAGGATCCTTAATTGGAAAATTGCTGCGAATGCTTAGTATTGGAGGAAGAAAAAGTCGTAACAAGGTTATC
253	3feffed3198d72ecb117c2f37448ee20	OTU_253	132	1406	1	GTCGCTACTACCGATTGAATGGTTTAGCGAGAACCTCGGATCGAGCCCTGGCCGTGCGCAAGCATGGTCGAGGTTTGAGAAGAAGCTCAAGCTTGATCATTTAGAGGAAGTAAAAGTCGTAACAAGGTTTTC
254	2c97e88ede91f7e37520c64b1bbd3be0	OTU_254	132	1399	1	GTCGCTACTACCGATTGAACGTTTTAGTGAGGTATTTGGATTGGACCTCTCGAGGCGCAAGCCTCGAGTGTTGTTCGAGAAGACTCCCAAACTTGAGCGTTTAGAGGAAGTAAAAGTCGTAACAAGGTTTCC
255	9c2f3c8c59179546306b27af8275c7b3	OTU_255	127	1398	15	GTCGCTCCTACCGATTGAATGTTCCGGTGAATACTTCGGACTGCGTGGTTTGCAGTTTCTGCATTCCTTGCGGAAAGTTGAATAAACCTTAACATTTAGAGGAAGGAGAAGTCGTAACAAGGTTTCC
256	a6d561fdb71209c5b46bb179926fa167	OTU_256	133	1397	4	GTCGCACCTACCGATTGAATGGTCCGGTGAAATTTTCGGACCGTGACAATGTCACCTTAACTGGGAGACGCTGTCATGGGAAGTTACTTAAACCTTACCATTTAGAGGAAGGTGAAGTCGTAACAAGGTTTCC
257	20a59c75bf3a5a7b690b06b1a1e02408	OTU_257	123	1392	12	GTCGCTCCTACCGATTTTGAGTGATCCGGTGAACCTAAAGGACCGTAGTCGGGCTTGACCCGATCGTGGGAATAGAAGTAAACCTTATCACTTAGAGGAAGGAGAAGTCGTAACAAGGTTTCC
258	9e0facaf92a5c8634d905f6c9c79800e	OTU_258	121	1390	3	GTCGCTCTTACCGATGGACTTCTCTATGAGTTTGGGGGACTGGCTATCTATTTATAGACAGCTATGGAAACCTATGCGAATAGTGTGGTCTAAAGGAAAGAGAAGTCGTAACAAGGCATCG
259	8a6f5f8f1b852077c543352c91368705	OTU_259	131	1385	16	GTCGCTCCTACCGATTGGATGTTTCGATGAGCCGTTCGGAGGAGACTGCTGACGGCGTAAGCTCTGAAGCAGTTTCCAAAGTTCTGCAAATCTGAATATCTAGAGGAAGGAGAAGTCGTAACAAGGTTTCC
260	bda7dfb55afe2d8ea2b14200d689aa25	OTU_260	132	1385	11	GTCGCTACTACCGATTGAATGGCTCGGTGAGGCCTTCGGACTGGCGCAGGAGGGTTGGCAACGACCCCCCCGCGCCGGAAAGTTGGTCAAACCCGGTCATTTAGAGGAAGTAAAAGTCGTAACAAGGTTTCC
261	8c3af4cc2f6066a73f621ee881eb6ebb	OTU_261	131	1385	3	CGTCGCTACTACCGATTGGACGTTTTAGTGAGACATTTGGACTGGGTCAGAGTAGTCGAAAGATTATTCTGTCTCGGAAAGACTTTCAAACTTGAGCGTCTAGAGGAAGTAAAAGTCGTAACAAGGTTTCC
262	508518958a31f08f4dea8b994ef6bdea	OTU_262	108	1381	6	GTCACACCATGGGAGTTGGGTTTACCCGAAGGCCGTGCGCCAACCAGCAATGGAGGCAGCGGACCACGGTGAGCTCAGCGACTGGGGTGAAGTCGTAACAAGGTAGCC
263	1b1cd52bcda82509084e38b91768c744	OTU_263	131	1379	9	CCGTCGCTCCTACCGATTGAGTGATCCGGTGAATAATTCGGACTGCAGCAGTGTTCGGTTCCTGAACGTTGCAGTGGAAAGTTTAGTGAACCTTATCACTTAGAGGAAGGAGAAGTCGTAACAAGGTTTCC
264	22d411c70f93b4ca38368709c56078b2	OTU_264	131	1367	8	GTCGTTGCTACCGATGATGTCAACGTGGAGCTATCGGGATGGATTATCGGGACGTCTTCGGACCCCTGTATGATCGAGAACTTTCGCAACACTTTGATATTAGAGGAAGCAAAAGTCGTAACAAGGTTACT
265	472373cde020a38f9186e3258c61f16f	OTU_265	132	1364	6	GTCGCTACTACCGATTGAACGTTTTAGTGAGGTATTTGGACTGGACCTTCGGAGGTTAATTCCTCCGTTGCTGTTCGGGAAGACTCCCAAACTTGAGCGTTTAGAGGAAGTAAAAGTCGTAACAAGGTTTCC
266	3074f0e872e3eb594204d541d53ab188	OTU_266	133	1362	2	GTCGCTCCTACCGATTGAATGATCCGATGAATATCATGGACTGAGAGTGTTAGAGTTTTCGGACTTCTACACTGCTCGGGAAGTGAAGTGAATCTTATCATTTAGAGGAAGGAGAAGTCGTAACAAGGTTTCC
267	296ec0118ac28c09c8747f6a4fdf7f8b	OTU_267	137	1360	1	GTCGCTACTACCGATTGAATGGTTTAGTGAGGCCTCCGGATTGGCACTGTCAGGCGGGCTTCGGTTCGTCCGACGGACGTCAAAAAGTTGGTCAAACTTGATCATTTAGAGGAAGTAAAAGTCGTAACAAGGTTTCT
268	aab68a513538ab22bdf45056e846a417	OTU_268	133	1353	1	GTCGCTACTACCGATTGAATGTTCTGGTGAAATCATTGGAGTGGTTTCGATAGGGTGTTATCACCGTATGGGAAACTGCAAAGACGCTTAAACCTGAGCATTTAGAGGAAGTAAAAGTCGTAACAAGGTTTCC
269	1d36cc675a1f136f43d6740159477b07	OTU_269	132	1352	5	GTCGCTCCTACCGATTGAATGGTCCGGCGAAACATTTGGAATTATTGTGTACCTACCATTGCGTAGTGCCAAACCAATGAAGTCTAGTAAACCTTAACATTTAGAGGAAGGAGAAGTCGTAACAAGGTTTCC
270	08191b2608ccde169331af45966cc772	OTU_270	137	1338	8	GTCGCTACTACCGATTGAATGGTTTAGTGAGGCCTCCGGATTGGCACTGTCAGACGGGCTTCGGTTCGTCCGACGGACGTCAAAAAGTTGGTCAAACTTGATCATTTAGAGGAAGTAAAAGTCGTAACAAGGTTTCC
271	54ac996bad6f317c4a158be1ca9b5e4e	OTU_271	128	1332	14	GTCGCTCCTACCGATTGAGTGGTCCGGTGAATACTTCGGACCGCGACTCGTGCAGTTTCTGTTACTTGTCGCGGAAAGTTGAATAAACCTTATCACTTAGAGGAAGGAGAAGTCGTAACAAGGTTTCC
272	9eedf4f6947d1a69459ee5c2a4d07861	OTU_272	107	1325	1	GTCAAGCCACGAAAGTTGGGAGGGCCCGAAGTCGCTGAGCTAACTCTCTGAGAGGCAGGCGCCGAAGGTCAGCTCGACAATTGGGACTAAGTCGTAACAAGGTAGCT
273	edeff794d8291b4b1b8b984e122a46e4	OTU_273	133	1322	2	GTCGCTACTACCGATTGAACGTTTTAGTGAGGTATTTGGACGAGGCCTTTCGAGGTTTTTAATCTCGATTGTTGCCTTGGAAGACTCCCAAACTTGAGCGTTTAGAGGAAGTAAAAGTCGTAACAAGGTTTCT
274	dd3f88d8430c161ba28f5eb4111846b4	OTU_274	131	1316	18	CCGTCGCACCTACCGATTGAATGGTCCGGTGAGATCCTCGGACTGCGATGACGCTCTGGCAACAGAGTTAATTGCGGAAAGTTGATCAAACCTTACCATTTAGAGGAAGGTGAAGTCGTAACAAGGTTTCC
275	c6eb1c4df9d15e42a863eda67a8c25e7	OTU_275	131	1311	13	CGTCGCTGCCTCCGATTGAGTGATCCGGTGAATAATTCGGACCGATAATTCGTTTGGTTCGCCGAACTTGTTGTTGGAAAGTCTAGTAAACCTTATCACTTAGAGGAAGCAAAAGTCGTAACAAGGTTTCC
276	82ba150d33e863b756faf113366cd07b	OTU_276	136	1304	4	GTCGCTACTACCGATTGAATGGTTTAGTGAGATCTTCGGATTGGTCTCGTTGGGGGAGGCAACTTTCCTGACGTTGATCCGAGAAGATGATCAAACTTGATCATTTAGAGGAAGTAAAAGTCGTAACAAGGTTTCC
277	d74543915e71f8d0229ed2b9b27bfa8f	OTU_277	131	1299	3	CGTCGCTACTACCGATTGAACGTTTTAGTGAGGTATTTGGATCGGCGCTCCGGAGGTTCGCGCCTCCGCTGTGTTGAGAAGACTCCCAAACTTGAGCGTTTAGAGGAAGTAAAAGTCGTAACAAGGTTTCC
278	1a90de8e5fb1c144c508fcc074887217	OTU_278	137	1298	3	GTCGCTACTACCGATTGAATGGTTTAGTGAGGCCTCCGGATTGGCACTGTCAGATGGGCTTCGGTCCATCCGACGGACGTCAAAAAGTTGGTCAAACTTGATCATTTAGAGGAAGTAAAAGTCGTAACAAGGTTTCC
279	99bd12d14a54007acfb616ea9e301bc7	OTU_279	133	1294	9	GTCGCTACTACCGATTGGATGGTTTAGTGAGGTCTTCGGATTGCGCTGAGGTGGGTCGCAAGACTCGCCTCGGCTGCGAGAAGTAGATCAAATTTGATCATCTAGAGGAAGTAAAAGTCGTAACAAGGTTTCC
280	41bb6f5b8891a620a0d84de9b853d1b1	OTU_280	131	1281	13	CGTCGCACCTACCGATTGAGTGTTCCGGTGAAGCCTCGGGATTGTAGTTGGGTTCCTTTATTGGATCCTGACCGCGAGAACCTGTCTAAACCTTATCACTTAGAGGAAGGTGAAGTCGTAACAAGGTTTCC
281	679a8bdae4abe5b0adbfc5993388fa62	OTU_281	131	1278	4	CCGTCGCTCCTACCGATTGAGTGATCCGGTGAATAATTTGGACTGCAGTAATGTTTGGATCCCGAATGTTGCAGCGGAAAGTTTAGTGAACCTTATCACTTAGAGGAAGGAGAAGTCGTAACAAGGTTTCC
282	656b23d03693f124cd59ef45cd1858c3	OTU_282	132	1275	1	ATCGCTCCTACCGATTGAATGTGTTGGTGAGGAGTTCGGATTGGCAGTTAGTGGTGATTCGCCACTGCTTGCAGCTGAGAAGTTCTCCAAACCGCCCCACTTAGAGGAAGGAGAAGTCGTAACAAGGTTTCC
283	22fc4c88f032311d1602b9d9f57a7605	OTU_283	131	1275	10	GTCGCTACTACCGATTGAACGTTTTAGTGAGGTATTTGGATTGGACCTTGGGAGGTTTGCGCCTTCCTTGCGTCCGAGAAGACTCCCAAACTTGAGCGTTTAGAGGAAGTAAAAGTCGTAACAAGGTTTCC
284	8806b796e6d220a4dea7d66560d8fce1	OTU_284	109	1264	23	GTCACACCCTGGGAATCGAAAGTATCTGAAGCTGTCGTTCTTAACCCGAAAGGGAGAGACGCTGTCACGGTAAAGTCCTTGACTGGGGTGAAGTCGTAACAAGGTAGTG
285	9c2ddcc69856ca59ea698a51203f7af0	OTU_285	131	1253	19	CGTCGCACCTACCGATTGAATGGTTCGGTGAAGATCTCGGACTTCGATATTCATTCTTTATTGAATTTATATTGTGGGAAGTTATCTAAACCTCATCATTTAGAGGAAGGTGAAGTCGTAACAAGGTTTCC
286	a583ab06edd4f176752d7f8fa27f9e0f	OTU_286	131	1248	10	CCGTCGCTCCTACCGATTGAGTGATCCGGTGAATAATTCGGACTGACGCAGTGCTCAGCTTCTGGACGTTGCGTCGGAAAGTTTCATGAACCTTATCACTTAGAGGAAGGAGAAGTCGTAACAAGGTTTCC
287	a9e48d26e40ed89e79f713045ed80d28	OTU_287	131	1246	6	CCGTCGCTCCTACCGATTGAATACGTTGGTGATTGAATTGGATAAAGAGATATCATCTTAAATGATAGCAAAGCGGTAAACATTTGTAAACTAGATTATTTAGAGGAAGGAGAAGTCGTAACAAGGTTTCC
288	f05ebb3cf4fc8dfa3d99be32a528af2f	OTU_288	131	1242	6	GTCGCTACTACCGATTGAATGGCTTAGTGAGCCTTTGGGATTGGCAGCCAACGCCGGCAACGGCAGCTGGCCGCCGAGAACTTATGCAAACTTGGTCATTTAGAGGAAGTAAAAGTCGTAACAAGGTTTCT
289	f31c56e2ce0245b6cdc4ed178a0c7228	OTU_289	136	1237	5	GTCGCTACTACCGATTGGATGGTTTAGTGAGACCCTCGGATTGATCCCGACATGGCTGGCAACAGCCGGGTCGTGGTGTTGAAAAGACGGTCAAACTTGACTATCTAGAGGAAGTAAAAGTCGTAACAAGGTTTCC
290	84f82338481d01fc50b4a7a5c62e1eef	OTU_290	136	1237	2	GTCGCTACTACCGATTGAATGGTTTAGTGAGATCCTCGGACCGGCCTCGGCACGGCGGTCTCCGTCGAGCCGCGGCTGCCGGGAAGACGATCGAACTTGATCATTTAGAGGAAGTAAAAGTCGTAACAAGGTTTCC
291	d16ee7f7f968b6f335733e636f3aed8b	OTU_291	102	1233	2	GTCGTTTCTTCCGACTGATACTAATCGTGAGTTGCAAGGACGTCACTGAAATTGCCGCAAACGCTTTGTATTGGAGGAAGAAAAAGTCGTAACAAGGTTATC
292	0f1aaa2a91281974fcef6e29eafcd130	OTU_292	108	1229	21	GTCAAGCCACGAGAGTCGGGAGCACCCGTAGTCGGTGATCCAACCCGCAAGGGAGGAAGCCGCCGAAGGTGAGCTCGATGATTGGGACTAAGTCGTAACAAGGTAGCC
293	8934ba7222a3355123370e17066ac7e7	OTU_293	136	1219	1	GTCGCTACTACCGATTGGATGGTTTAGTGAGGTCCTCGGATTGGTCCGGGCTTGGCGGGAAACCGCTTTGCCGTGGAGCCGAGAAGACGATCGAACTTAACGATCTAGAGGAAGTAAAAGTCGTAACAAGGTTTCC
294	9ead14e7abd32c2e56eda68266808e63	OTU_294	131	1201	6	GTCGCTACTACCGATTGAATGGCTTAGTGAGCCTTTGGGACTAGCCGCTTGTACCGGCAACGGGAACGAGTGGCCGGGAACTTAGGCAAACTTGGTCATTTAGAGGAAGTAAAAGTCGTAACAAGGTTTCT
295	6d43a6741d90e18f0bb9d302de2bdf8f	OTU_295	131	1197	16	CCGTCGCTCCTACCGATTGAGTGGTCCGGTGAATAATTCGGACTGAGGATTTAGGCAGTTTCTGTCTTTATCTTCGGGAAGTCTAGTGAACCTTATCACTTAGAGGAAGGAGAAGTCGTAACAAGGTTTCC
296	1b6892fb9021ece7a76b464916aa233c	OTU_296	128	1196	18	GTCGCTCCTACCGATTGAGTGATCCGGTGAATAATTCGGACCTGGATCTAAGCCGGCAACGGTTTGGACTTGGGAAAGTCTAGTGAACCTTATCACTTAGAGGAAGGAGAAGTCGTAACAAGGTTTCC
297	92e4008011db82d57ff0a904cdbc56fa	OTU_297	132	1195	1	GTCGCTACTACCGATTGAACGTTTTAGTGAGAAATCTGGATTTGACCTCTGTGGGTTCATTCCCACAGTGCTGTCGGAGAAGTTTTTCAAACTTGAGCGTTTAGAGGAAGTAAAAGTCGTAACAAGGTAGCT
298	f219441c4f44885033e38204f98ceb14	OTU_298	132	1190	1	GTCGCTTCAACCGATTGGATGACACGGCAAATTACACGGACTTTCAAAGTCGCCATGTTCTACATCGCACTTCGAAAGGAAGTGTTGTGAGCCTTATCATCTAGAGGATGAAGAAGTCGTAACACGGTATCC
299	d6685963a72cca9313e79e4a8a3e8f5d	OTU_299	106	1189	7	GTCACACCATGGGAGTTGGGTTTACCCGAAGGCGGTGCGCCAACCTTTTGGAGGCAGCCGACCACGGTAAGCTCAGCGACTGGGGTGAAGTCGTAACAAGGTAGCC
300	a5d56b2ebff8160c0f0c0adeee65caa8	OTU_300	147	1184	3	GTCGCTACTACCGATTGAACGGTTTAGTGAGGTCTTTGGATCGGCACGCGGCGGGGACCGGTATTTTGCATGCCGACCTCGCTCGCGCGCCGAGAAGACGATCGAACTTGATCGTTTAGAGGAAGTAAAAGTCGTAACAAGGTTTCC
301	a814ee90997614e2b3ad13f83031ac01	OTU_301	131	1183	17	CCGTCGCTCCTACCGATTGAGTGATCCGGTGAATTGTTCGGACTGCGGCCATTTTCGGTTTCCGAGTTTGGCTGCGGGAAGTTCCGTGAACCTTATCACTTAGAGGAAGGAGAAGTCGTAACAAGGTTTCC
302	81230beee1f89935dab00ffb478f97a1	OTU_302	104	1177	12	GTCGTTTCTTCCGACTGGTACTCATTGTGAATTGCGAGGATGTTTCGACAAAATCGTTGTAAATGCTGGGTATTGGAGGAAGAAAAAGTCGTAACAAGGTTATC
303	a681f9622f47f82a1d4a468bb4376d14	OTU_303	124	1176	13	GTCGCTCCTACCGATTTCGAGTGGTCCGGTGAATCTTTCGGACTGCGCGCGGCTTCGTGCCGTGTCGCGGAAAGTCAGGTAAACCTTATCACTTAGAGGAAGGAGAAGTCGTAACAAGGTTTCC
304	c48b4e661dd5782d1bb67b4380ab582f	OTU_304	131	1171	7	CCGTCGCTCCTACCGATTGAGTGATCCGGTGAATAATTCGGACTGCAGCAGTGTTCAGTTACTGAACGTTGCCGCGGAAAGTCTAGTGAACCTTATCACTTAGAGGAAGGAGAAGTCGTAACAAGGTTTCC
305	7ff6a16d0d223a99303386408ec44bed	OTU_305	131	1171	6	CGTCGCACCTACCGATTGAATGGTCCGGTGAGGACTCGGGATTGCGGTTTGGCTCCTTCATTGGGGCCTGACTGTGAGAACTTGTCCAAACCTTATCATTTAGAGGAAGGTGAAGTCGTAACAAGGTTTCC
306	521ca7d358509c1ea6e024eb0bdb5332	OTU_306	136	1165	2	GTCGCTACTACCGATTGAACGATTTAGTGAGAACATCGGACCGTTCCTACTTGGCTCCTCTGGAATTGGGTAGGTGACTAGAAGATGTTCAAACTTGACCGTTTAGAGGAAGTAAAAGTCGTAACAAGGTTTTCGT
307	35f78ed705ebc4e9afff9502113f8277	OTU_307	131	1163	18	CGTCGCACCTACCGATTGAATGGTTCGGTGAGGTCTCAGGATCGTGGCTTAGCACCTTCATTGGAGCTCTGCCGTGAGAATTTGCCCAAACCTCATCATTTAGAGGAAGGTGAAGTCGTAACAAGGTTACC
308	7117a6a5bbec5b8ba8f893e8eeabc550	OTU_308	136	1161	2	GTCGCTACTACCGATTGAACGATTTAGTGAGAACCTCGGACCGTCAACCACGGGAGGCCTCGCGTCTCTTGATGTTCGGTGGGAAGACGTTCAAACTTGATCGTTTAGAGGAAGTAAAAGTCGTAACAAGGTTTTC
309	50b3fb31b9511b3a3eb15845ee8d2404	OTU_309	131	1159	6	CGTCGCACCTACCGATTGAATGGTCCGGTGAGGACTCGGGATTGTGGTTTGGCTCCTTCATTGGGGCCTGACTGCGAGAACTTGTCCGAACCTTATCATTTAGAGGAAGGTGAAGTCGTAACAAGGTTTCC
310	e8575092bc0e5ccfe8ce6cdc4ac4b552	OTU_310	131	1158	2	CGTCGCTCCTACCGATTGAGTGATCCGGTGAATAATTCGGACCGGCGTCTTAATTGGTTCTCCGATTTCGATGCTGGAAAGTCTAGTGAACCTTATCACTTAGAGGAAGGAGAAGTCGTAACAAGGTTTCC
311	483a68690f34645fe8cb8362b619ca13	OTU_311	168	1158	19	ACAGTGACACTTACTCCTCAAGCCGAGAGGAACGATAATACCCCCACTATATCGGGAACAACTGATGCATCGACAACCGATGATATCGTTATCACGATCATTGATAGTCAAGGTGAGCAACAAACGATTATTACTAATGCCGATGAAAACGGAAATTTCAGCGTTGAT
312	444d7a63d98dd2c66768c52a5c983195	OTU_312	131	1156	1	CGTCGCTACTACCGATTGAACGTTTTAGTGAGGCATTTGGACCGACGCGTCTCGGCTTAACCGCCGGTTCGCGTTGGAAAGACTTCCAAACTTGAGCGTTTAGAGGAAGTAAAAGTCGTAACAAGGTTTCC
313	d83ff4f32a1b5d2ec8456dea84600c59	OTU_313	131	1155	6	CGTCGCACCTACCGATTGAATGGTCCGGTGAAGCCTCGGGATTGTGATGAGTCTCCTTTATTGGGGATTTGTCGCGAGAACTTGTCTAAACCTTATCATTTAGAGGAAGGTGAAGTCGTAACAAGGTTTCC
314	47ede2dac0278ae4ff03824823c9fcea	OTU_314	131	1154	11	CCGTCGCTCCTACCGATTGAGTGATCCGGTGAATAATTCGGACTGCAGCATTGTTCAGTTCCTGAACGTTGCAGCGGAAAGTTTAGTGAACCTTATCACTTAGAGGAAGGAGAAGTCGTAACAAGGTTTCC
315	ff007eedbcfb5ceda0680f2666758f35	OTU_315	132	1151	3	GTCGCTACTACCGATTGAATGGCTTAGTGAGATTTCCGGATTGGCGTTAGGGAGCCGGCAACGGCACCCTTTGGCTGAGAAGTTGCTCAAACTTGGTCATTTAGAGGAAGTAAAAGTCGTAACAAGGTTTCC
316	497d465f8260650844d8dcece24f565b	OTU_316	128	1150	5	GTCGCACCTACCGATTGAATGTTCCGATGAAAACTCGGGATTTCGATTAGTTGCATAGGTGCAGCAGATTGGAAGAACTTGTCTAAATCTTATCATTTAGAGGAAGGTGAAGTCGTAACAAGGTTTCC
317	ba056428dc894492ebed9d329fb719f7	OTU_317	132	1150	5	GTCGCTACTACCGATTGAACGTTTTAGTGAGGTATTCGGACTGGACCTCTTGAGATTCGCGTCTCTAGTGCTGTTCGGGAAGACTCCCAAACTTGAGCGTTTAGAGGAAGTAAAAGTCGTAACAAGGTTTCC
318	bdebf9f2f1b823d6f8b4f709241a412f	OTU_318	132	1149	5	GTCGCTACTACCGATTGAATGGCTTAGTGAGGCTTCCGGATTGGTTTAGAGAAGGGGGCAACTCCATCTTGGAACCGAGAAGCTAGTCAAACTTGGTCATTTAGAGGAAGTAAAAGTCGTAACAAGGTTTCC
319	7a53d44e65ca7149b85c130b1e79d44f	OTU_319	136	1148	1	GTCGCTAGTACCGACTAGTTGGTTTAGTGAGTCGCTTGGATTTATAGGTAGGAAGGGCGCAAGTCCGGAATATCAGTGAAGAAGAATGGCAAACTTGGTCAACCGGAGGAACTAAAAGTCGTAACAAGGTCTCCGT
320	eae013f55e53036d4d29eebb7bf0c21c	OTU_320	132	1148	6	GTCGCTACTACCGATTGAATGGTTTAGCGAGATTCTCGGATCGGGCCTTGCTCGGGAGCAATCCTGTACGAGGTCTGAGAAGAAGTTCAAGCTTGATCATTTAGAGGAAGTAAAAGTCGTAACAAGGTTTTC
321	27534364e2477d3ba82ded78dcc1c7ff	OTU_321	131	1147	2	CGTCGCTACTACCGATTGAATGTTTTAGTGAGGTCCTCGGATTGTTTGCCTGGCGGTTAACGCTGCCTGGCTAACGAAAAGACGACCAAACTGTAGCATTTAGAGGAAGTAAAAGTCGTAACAAGGTTTCC
322	57a99e71adc0292a57c98dfe8e0a76e8	OTU_322	131	1144	22	CGTCGCTCCTACCGATTGAGTGATCCGGTGAATAATTCGGACTGCAGCTTTGAACAGTCCCTGTTCTCGGCTTGCGGAAAGTTTAGTGAACCTTATCACTTAGAGGAAGGAGAAGTCGTAACAAGGTTTCC
323	5c20bec4c55a0c778a325d3631c9cd50	OTU_323	139	1141	2	GTCGCTACTACCGATTGAATGATTTAGTGAGGTCAACGGATTGGCCGGTGGAACTTGCCTCTCGGGGTGGGTACCGCTGCGCTGAGAAGTCGCCCGAACTTGATCATTTAGAGGAAGTAAAAGTCGTAACAAGGTTTCC
324	5a0db39d3a17e8d29306d56c976822e7	OTU_324	132	1139	22	GTCGCTCCTACCGATTGAATGGTCCGGTGAAGCGTTCGGACCGTGGCCTTTGGACGGTTCGCCGTCTGTTGGCTGCGGGAAGTTCGTTAAACCTTATCATTTAGAGGAAGGAGAAGTCGTAACAAGGTTTCC
325	bca50662d5b32e0f35e5f6c25ca62523	OTU_325	106	1132	12	GTCACACCATGGGAGTTGGTTTTACCTGAAGACGGTGCGCTAACCGAAAGGGGGCAGCCGGCCACGGTAGGGTCAGCGACTGGGGTGAAGTCGTAACAAGGTAGCC
326	b3f01d98bfe79ed4a47371ba1033b6e1	OTU_326	131	1126	6	CGTCGCTACTACTGATTGGGTGTTCAAGTGAGATGCTTTGACCTTTGTTGCATGGTTCATTATTGTGCTTCGAAAGGAAAAAGTTTCAAGCTTGAGTGTCTAGAGGAAGTAAAAGTCGTAACAAGGTTTCC
327	90421b0c6a792b3d9b50e77daa00b685	OTU_327	131	1122	1	CCGTCGCTCCTACCGATTGAGTGATCCGGTGAATAATTTGGACTGCAGCAATGCTTGGATCCCAAATGTTGCAGCGGAAAGTTTAGTGAACCTTATCACTTAGAGGAAGGAGAAGTCGTAACGAGGTTTCC
328	3380298ba2d4501d471acbe58c0c6bbe	OTU_328	131	1120	8	GTCGCTCCTACCGATTGAGTGTTCCGGTGAGGCTTTGGGAGAGCTGAGTGGATTGTGTCTCACAAACTGCTCGGTTTGAACTTAGTCAAACCTTATCACTTAGAGGAAGGAGAAGTCGTAACAAGGTTTCC
329	b0bb017f0d3de169df5035ed922f0589	OTU_329	136	1119	10	GTCGCTAGTACCGACTAGTTGGTTTAGTGAGTCGCTTGGATTTATAGGTTGGAAGGTCGCAAGGCCGGAAAATCAGTGAAGAAGAATGGCAAACTTGGTCAACCGGAGGAACTAAAAGTCGTAACAAGGTCTCCGT
330	3a8ed4e87315f7bee34916be1ebc7c2b	OTU_330	132	1119	20	GTCGCACCTACCGATTGAATGGTTCGGTGAGCCCTTCGGATTGAGGCAATGTCTCTTTCATTAGAGACGCTGCCTTGAGAAGTTGTGCAAACCTCATCATTTAGAGGAAGGTGAAGTCGTAACAAGGTTTCC
331	10d7307808c31c766e54ccb39b247d84	OTU_331	132	1119	4	GTCGCTACTACCGATTGAACGTTTTAGTGAGGTATTTGGACTGGACCTGGCCGGGTTAACGCCTGGCTTGTTGTCCGGGAAGACTCCCAAACTTGAGCGTTTAGAGGAAGTAAAAGTCGTAACAAGGTTTCC
332	83ffcbf8dd13039b8c1748feb5bfbc09	OTU_332	131	1118	19	CGTCGCTCCTACCGATTGAGTGATCCGGTGAATAATTCGGACGGAGGCTAGCGTAAGTTTACTTACATTAGTTTCTGAAAGTCTAGTGAACCTTATCACTTAGAGGAAGGAGAAGTCGTAACAAGGTTTCC
333	3be8cbad2dd9d67397cf476c592758b7	OTU_333	131	1115	12	CCGTCGCTCCTACCGATTGAATGAACCGGTGAATAATCCGGATTGCGAGTAATTCTGGTTTCCAGAGTTTCTTACGAGAAGTTTAGTGAACCTTTTCATTTAGAGGAAGGAGAAGTCGTAACAAGGTTTCC
334	3fd01f584625fc3372d8594f6293b9f7	OTU_334	106	1107	16	GTCACATCACGAAAGTCGGCTGTACCGGAAGCCGGTGGGCTAACCTTCGGGAGGCAACTGTCGATGGTATGGTCGGCGATTGGGGTGAAGTCGTAACAAGGTAGCT
335	eb666cf3da3ec0e897099df924736265	OTU_335	131	1096	11	CGTCGCACCTACCGATTGAATGGTCCGGTGAAGCCTCGGGATTGTGATGAGTTCCCTTTATTGGGAGTTTGTCGCGAGAACTTGTCTAAACCTTATCATTTAGAGGAAGGTGAAGTCGTAACAAGGTTTCC
336	4c4054cffa97d2fcc2d2aed2a20e72a3	OTU_336	106	1094	5	GTCACACCATGGGAGTGGGATGCAAAAGAAGTAGTTAGTCTAACCTTCGGGAGGACGATTACCACTTTGTGTTTCATGACTGGGGTGAAGTCGTAACAAGGTAACC
337	8b5b2217d1e61c6c5220f835fba644b7	OTU_337	131	1094	12	GTCGCTACTACTGATTGGATGTTTAAGCGAGGTTCTCGGACTGCTAGTGACTTAGCTTCGGTGAGGTCACAGTGTGGGAAGTGAACCTAGCTTTGGTGTCTAGAGGAAGTAAAAGTCGTAACAAGGTTTCC
338	83321a497e78760c697c5f084216ae8a	OTU_338	132	1086	2	GTCGCTCCTACCGATTGAATGGTCCGGTGAAGCGTTTGGACTATGGTTTTCTGATGGTCCGCCGTTGGATTACCGTGGGAAGTTCGTTAAACCTTATCATTTAGAGGAAGGAGAAGTCGTAACAAGGTTTCC
339	b9f2496a61dd8fd3267141f38bb75d13	OTU_339	136	1086	7	GTCGCTACTACCGATTGAATGGTTTAGTGAGATCCTCGGATTGGACCCGCGGCCCCTTTCGGGGGGCCGGCGGAGGCTCGAGAAGACGATCAAACTTGATCATTTAGAGGAAGTAAAAGTCGTAACAAGGTTTCCG
340	16337d8d7948563cae8e6892e1a983fe	OTU_340	132	1085	7	GTCGCTACTACCGATTGAATGGCTTAGTGAGGTCTTGGGATTGGCTTCGGGGAGCCGGCAACGGCACCCTGTTGCTGAGAACTTGATCAAACTTGGTCATTTAGAGGAAGTAAAAGTCGTAACAAGGTTTCC
341	e7042e15412c48debe4f523a9b63fbfd	OTU_341	114	1082	5	GTCGCTCCATCTGATTGGGTGTGCAGGTGAAATTGGTCTCATATGAAATCATGTCGTTTGAAGAGCAAGTGAACAGGTCCACTAAGAAGAAGGAGAAGGCGTAACAAGGTTTCC
342	d91d77f055d705e76fe95df8e857c6bd	OTU_342	131	1082	13	CGTCGCTCCTACCGATTGAATGTTCCGGTGAATTTTCGGGAGGGTCTTGCGCTGGCTTTAAACCCGGCGCAGGACCTGAACTTACATAAATCTTAGCATTTAGAGGAAGGAGAAGTCGTAACAAGGTTTCC
343	25eebaca21790e9386fedaa7c10aff40	OTU_343	132	1081	10	GTCGCTCCTACCGATTGAGTGGTCCGGTGAGGCCTTGGGAGGGCTAAGTGGACTGTGTTTTCATGGACCGCCTGGCCCGAACCTGGTCAAACCTTATCACTTAGAGGAAGGAGAAGTCGTAACAAGGTTTCC
344	3b29c593a697e0b3f52a6cf3b4daa357	OTU_344	127	1068	2	GTCGCTCCTACCGATTGAGTGTTCCGGTGAATAATTTTGATTGCTGTTTCTTTAGCAATGATGTAACATGTGAAACATTTAATGAACCTTAACACTTAGAGGAAGGAGAAGTCGTAACAAGGTTTCT
345	2d69be85542c18dd4cd8e956f06f7828	OTU_345	131	1067	13	CGTCGCACCTACCGATTGAATGGTCCGGTGAAGACTCGGGATTGTGGTCTAGCTCCTTCATTGGGGCTTGACCGCGAGAACCTGTCTAAACCTTATCATTTAGAGGAAGGTGAAGTCGTAACAAGGTTTCC
346	f8e62de979b7b0cf67c2f1be9d827be9	OTU_346	131	1056	13	CGTCGCTCCTACCGATTGAGTGATCCGGTGAATAATTCGGACCTGAATTGAGTGCAGTTCGCTGCTATCAAATCGGGAAAGTCTAGTAAACCTTATCACTTAGAGGAAGGAGAAGTCGTAACAAGGTTTCC
347	0cba65ed7e33ec29055b481596f4cbd9	OTU_347	131	1053	12	CGTCGCTCCTACCGATTGAGTGATCCGGTGAATAATTCGGACCGCAGCAGTGCCCAGTTCTCTGAGCGTTGCAGTGGAAAGTTTAGTGAACCTTATCACTTAGAGGAAGGAGAAGTCGTAACAAGGTTTCC
348	2dd9a4ff64a0d1fafb05f1052db0ee26	OTU_348	127	1050	14	GTCGCTCCTACCGATTGAGTGATCCGGTGAATAATTCGGACTGCGAAAGGCCCGGTTTCCGAGTCTTTTGTAGGAAGTTTAGTGAACCTTATCACTTAGAGGAAGGAGAAGTCGTAACAAGGTTTCC
349	e9fe2720262b33ef3ca8261b8a620fa5	OTU_349	131	1048	12	CGTCGCACCTACCGATTGAATGGTCCGGTGAGGACTCGGGATTGTGGTTTGGCTCCTTCATTGGGGCCTGACTGTGAGAACTTGTCCAAACCTTATCATTTAGAGGAAGGTGAAGTCGTAACAAGGTTTCC
350	152a4c536b348a7b9920dea2a8fb9b1d	OTU_350	162	1043	3	GTCGCTACTACCGATCGGATGGTTTGGTGAGGCCGCTGGACGGGAACCGGGCCGGTCTGCCCTGGCCCCTCCTCGTGGGGGGTTCAGGCTTCCGGCTGCAGGGGCCCGGAAGGCGTCCGAACTCGATCATTTAGAGGAAGTAAAAGTCGTAACAAGGTTTCC
351	eb06f7d971f3f08e8bdcc67766590be0	OTU_351	101	1042	15	GTCACACCATGGGAGTGGATTGCACCAGAAGTAGCTAGCTTAACATTGGGCGGTTACCACGGTGTGGTTCATGACTGGGGTGAAGTCGTAACAAGGTAGCC
352	fb712bae4a0cbc7fd8c41bd68dd393cb	OTU_352	131	1041	15	CCGTCGCTCCTACCGATTGGATGATCCGGTGAATAATTCGGACTGCGGAGTTGCTCGGTTTCCGAGCTTCTCTGCGGGAAGTTTAGTGAACCTTATCATCTAGAGGAAGGAGAAGTCGTAACAAGGTTTCC
353	abfb6b0215ea7b54ca92773e98d1feb6	OTU_353	108	1040	2	GTCACATCACGAAAGTTGGCTGTACTAGAAGTCGCTGGGCCAACCCGCAAGGGAGGCAAGTGCCGACGGTATGGTTGATGATTGGGGTGAAGTCGTAACAAGGTAGCT
354	77e801ea937ecd8f248b9a06f99d9c2f	OTU_354	136	1040	17	GTCGCACCTACCGATTGAATGGTCCGGTGAATTCTTCGGACTGAGACTTTGACTTACTTTCGGGTAAGACGCTGTCATGGAAAGTGGATTAAACCTTATCATTTAGAGGAAGGTGAAGTCGTAACAAGGTTTCCGT
355	a58550baa187d2b4c7b45d746b5e06ae	OTU_355	127	1035	17	GTCGCTCCTACCGATTGGATGATCCGGTGAGCTATTCGGACTTTCGCCCTGTCGGTTTCCGACTTGGTGAGGGAAAGTCTCGCGAACCTTATCATCTAGAGGAAGGAGAAGTCGTAACAAGGTTTCC
356	18e16567a88a334be6f07acbdeb934c7	OTU_356	136	1031	6	GTCGCTACTACCGATTGAATCATTTAGCGAGAATTTTGGATCTGTGCCCTGGTGATCAGCAATGGTCGCCCGGGATTTCGGAGAAATCATTCCAGCTTGATGATTTAGAGGAAGTAAAAGTCGTAACAAGGTTTCC
357	724a904e55f8ada9a9a5f5ada358dc2b	OTU_357	136	1025	18	GTCGCACCTACCGATTGAATGGTCCGGTGAATTCTTCGGACTGCGGCTTTGACTCGATTTCGGTCGAGGCGTTGCTGCGGGAAGTTGATTAAACCTTACCATTTAGAGGAAGGTGAAGTCGTAACAAGGTTTCCGT
358	8d094b64ae0fc968413bd36df216cae2	OTU_358	131	1022	1	GTCGCTACTACCGATTGGACGTTTTAGTGAGACATTTGGACTGATGTGGTGCTTGCTCACGCTGGCGCCATCGTCGGGAAGACTTTCAAACTTGAGCGTTTAGAGGAAGTAAAAGTCGTAACAAGGTTTCC
359	2a250085bc4abc09de46d9f789bbf5dd	OTU_359	131	1021	1	CGTCGCACCTACCGATTGAATGGTCCGGTGAAGCCTCGAGATTGTGGTTAGTCTCCTTTATTGGATGTTAGCCGCGAGAACTTGTCTAAACCTTATCATTTAGAGGAAGGTGAAGTCGTAACAAGGTTTCC
360	2966856de446720734969e3fa96f76a7	OTU_360	128	1020	4	GTCGCACCTACCGATTGAGTGTTCCGGTGAAGCCTCGGGATTGTAGCTGTTTCCTTTATTGGGTACAGCCGTGAGAACTTGTCTGAACCTTAACACTTAGAGGAAGGTGAAGTCGTAACAAGGTTTCC
361	0d4c7c0d9eccb31e7c4edba54e81d44f	OTU_361	131	1017	1	CGTCGCACCTACCGATTGAATGGTCCGGTGAAGCCTCGGGATTGTGGCGAGTTCCCTTTATTGGGAGTTTGTCGCGAGAACTTGTCTAAACCTTATCATTTAGAGGAAGGTGAAGTCGTAGCAAGGTTTCC
362	a26190e65dbccc7ad8ed26889653a005	OTU_362	131	1013	13	CGTCGCACCTACCGATTGAATGGTCCGGTGAAGACTCGAGATTGTGGTCTAGCTCCTTCATTGGGGCTTGACCGCGAGAACCTGTCTAAACCTTATCATTTAGAGGAAGGTGAAGTCGTAACAAGGTTTCC
363	6d94bb7888da6d3d8c016bf46189e341	OTU_363	131	1011	18	CCGTCGCTCCTACCGATTGGATGTTCCGGTGAATAATTCGGACTGCGGCAATATTCGGATTCCGAACGTTGCAGCGGAAAGTTTAGTGAACCTTAACATCTAGAGGAAGGAGAAGTCGTAACAAGGTTTCC
364	9b8cd79da28f287b82fb068f84863a24	OTU_364	127	1009	10	GTCGCTCCTACCGATTGAATGTTCCGGTGAATACTTTGGACTGCGAACACTGTAGTTTCTACTATGTTTGTGGAAAGTTGAATAAACCTTAACATTTAGAGGAAGGAGAAGTCGTAACAAGGTTTCC
365	24c1489c87322b29c8bbd440cd74b82b	OTU_365	106	1009	17	GTCACACCATGGGAGTGGAATCCGCCAGAAGTGGGTAGGGTAACCGTAAGGAGCCCGCTTACCACGGTAGGTTTCATGACTGGGGTGAAGTCGTAACAAGGTAGCC
366	3b8c03e34bed4bb9a4633e5c0beeffb9	OTU_366	136	1006	2	GTCGCTACTACCGATTGAATGGTTTAGTGAGGACTCCCGATTGGCGCCGCCGCCCCGGCAACGGAGCAGCGGACTGCCGAAAAGTTGTTCAAACTTGATCATTTAGAGGAAGTAAAAGTCGTAACAAGGTTTCCGT
367	23f6a3528c7ac3ba69bc5dc52525a312	OTU_367	132	1001	3	GTCGCTACTACTGATTGGGTGTTCAAGTGAGATGCTTAGACCCTTGTTAGTATGGTCCAGTATTGTGCTGACGTAAGGAAAAAGTTTCAAGCTTGAGTGTCTAGAGGAAGTAAAAGTCGTAACAAGGTTTCC
368	21c065ac418c4ba9af57fef919cb18db	OTU_368	128	997	11	GTCGCTCCTACCGATTGAATGCTCAGGTGAGCCATTCGGACCTTCATCATGTCGGTTTCCGGTTTTGATGAGGGAAAGTCTTGCGAACCTTATCATTTAGAGGAAGGAGAAGTCGTAACAAGGTTTCC
369	71fe1869d9f25853c69abd13f090e686	OTU_369	131	994	18	CCGTCGCTCCTACCGATTGGGTGATCCGGTGAATAATTCGGACTGCAGCTTTGATCGGTCTCCGATCTTTGCCGCGGGAAGTTTAGTGAACCTTATCACCTAGAGGAAGGAGAAGTCGTAACAAGGTTTCC
370	a3c0b2e38af026e01ec1547a5b4213db	OTU_370	128	991	13	GTCGCACCTACCGATTGAATGGTCCGGTGAAATCTTCGGATCGCGGCTTGGCCCTTTTTTGGGACGAGTTGCCAAAAGTTGATTAAACCTTGCCATTTAGAGGAAGGTGAAGTCGTAACAAGGTTTCC
371	efabc76b8a920cc5ec4e0f1d41ae4ec8	OTU_371	127	991	1	GTCGCTCCTACTGATTGAATGATCCGGTGAATGTCTTGGAATTAGCCTGCAACCAGTCACCTGGGAGCTGCTGTAAAAGGTATGAGCCTTATCATTTAGAGGAAGGAGAAGTCGTAACAAGGTTTCC
372	db5c9d3ba8e4fdd4f2d162be14dba41d	OTU_372	131	990	13	CCGTCGCTCCTACCGATTGGATGATTCGGTAAGCTTTTGGGATTGATTGACTAACTGTCACTGACATTAGTTGTTAACAACTTAATCAAACCTAATCATCTAGAGGAAGGAGAAGTCGTAACAAGGTTTCC
373	282d164190b832d0992a2f1687259ebe	OTU_373	106	987	4	GTCGTTTCTTCCGACTGATACTCATTGTGAGTTGCAAGGATCCTTTATTGGAAAATTGCCGCGAATGCTTTGTATTGGAGGAAGAAAAAGTCGTAACAAGGTTATC
374	4f86242c485cd8e5e553a07f413507b6	OTU_374	131	987	12	CGTCGCACCTACCGATTGAATGGTCCGGTGAAGCCTCGGGATTGTGACTAGTTCCCTTTATTGGGAGTTTGTCACGAGAACTTGTCTAAACCTTATCATTTAGAGGAAGGTGAAGTCGTAACAAGGTTTCC
375	75befa481fd5e782fb120514671cc546	OTU_375	132	978	20	GTCGCACCTACCGATTGAATGACTCGGTGAAAAATTGGGACTGTGGTTTTATTTGATTCATTTCAAATTTAACTGTGGGAACTTTCTTTAACCTATTCATTTAGAGGAAGGTGAAGTCGTAACAAGGTTTCC
376	f7cc92d84c661975b6df2ec3c020bb3c	OTU_376	108	976	15	GTCACATCACGAAAGTTGGCTGTACCGGAAGTCGGTGGGCTAACCCGCAAGGGAGGCAACTGCCCATGGTATGGTTAGCGATTGGGGTGAAGTCGTAACAAGGTAGCT
377	abf2d4b24e184b9b5df8c4337bfc131f	OTU_377	133	970	4	GTCGCTACTACTGATTGGATGTTAAAGCGAGATCTTCGGACCTCGGGTTCATGGTCCACCCGGACCTAGAGCTATGGGGGAAGTAGATCAAGCTTTGGTGTCTAGAGGAAGTAAAAGTCGTAACAAGGTTTCC
378	453aa46cc6d7c67cbe6bb120478d3ad7	OTU_378	132	969	11	GTCGCTACTACCGATTGAATGGCTTAGTGAGGCCTCCGGATTGGTTTAAAGAAGGGGGCAACTCCATCTTGGAACCGAAAAGCTGGTCAAACTTGGTCATTTAGAGGAAGTAAAAGTCGTAACAAGGTTTCC
379	35ac6cd3e6ea9ccb69d69b579c9ca477	OTU_379	131	968	21	CCGTCGCTCCTACCGATTGAGTGATCCGGTGAATCATTCGGACCGCAGCAGTAGGCAGTTCCTGTCAGCTGCAGTGGGAAGTTTCGTGAACCTTATCACTTAGAGGAAGGAGAAGTCGTAACAAGGTTTCC
380	6cc353e1b7eedfc2ca99b5fc236d13b1	OTU_380	131	967	2	CGTCGCTACTACCGATTGAACGTTTTAGTGAGGCATTTGGACCGACGCGTCTCGGTTTAACCGCCGGTTCGTGTTGGAAAGATTTCCAAACTTGAGCGTTTAGAGGAAGTAAAAGTCGTAACAAGGTTTCC
381	ea9325dbb18259b8fe8f8b9d88a834ab	OTU_381	106	966	3	GTCACACCATGGGAGTTGACATTGGCAGAATACATTGAGCTAACCTTCGGGGAGCAGGTGTGCAAGCTAGTGTTGATGACTGGGGTGAAGTCGTAACAAGGTAGCA
382	7bd4dac474f1a04eaf41d5562eb53cdc	OTU_382	161	966	11	GTCGCTCCTACCGATGAATGAATCGGTGAGAATTTGGGAGAGCTGAAGAGAGGATTTGGGTTGGAAACGGCCTAGATCTGAAACGTGTCGAGAGATGCGGGAGCTACAAACTTGTTCAAACCTGTTCATTTAGAGGAAGGAGAAGTCGTAACAAGGTATTC
383	6b49b809832f1c7e6c9a80ec0353675c	OTU_383	136	966	16	GTCGCTACTACCGATTGAATGGTTTAGTGAGATCTTCGGATTGGAGTCCTCGGTGGCGGCGACGCCGCCTTGGGCAACCGAGAAGTTGAGCTAACTGAATTATTTAGAGGAAGTAAAAGTCGTAACAAGGTTTCCG
384	78b3202e73f134130c6b370998d16bf8	OTU_384	132	965	1	GTCGCTACTACCGATTGAACGTTTTAGTGAGGTATTTGGACTGGACCTCGGCCGGTTAACGCCGGTTGTGTTGTCCGGGAAGACTCCCGAACTTGAGCGTTTAGAGGAAGTAAAAGTCGTAACAAGGTTTCC
385	2caeb20165863b318c0e6f83814b4f71	OTU_385	131	962	5	CGTCGCTACTACCGATTGGACGTTTTAGTGAGACATTTGGACTGGGTCAGAGTAGTTGAAAGACTATTCTGTCTCGGAAAGACTTTCAAACTTGAGCGTCTAGAGGAAGTAAAAGTCGTAACAAGGTTTCC
386	b82d3256df072373be55327ded2e1d90	OTU_386	124	955	6	GTCGCACCTACCGATTGAATGATTCGGTGAAGCTTTCGGATTGCGCCACTGGCCTCGGTCGGCAGCGTGAGAAGTTATCTAAACCTCATCATTTAGAGGAAGGTGAAGTCGTAACAAGGTTTCC
387	41127b24b40994646d061f893c73782b	OTU_387	131	954	12	CCGTCGCTCCTACCGATTGAGTGATCCGGTGAATAATTCGGACTGCAGTCGTGTTCAGTTCCTGAACGTGGCAGCGGAAAGTTTAGTGAACCTTATCGCTTAGAGGAAGGAGAAGTCGTAACAAGGTTTCC
388	7e243b69dee7bd70f5244edf5ab9db0e	OTU_388	124	953	17	GTCGCTCCTACCGATTTCGAGTGGTCCGGTGAATCTTTCGGACTGCGCGCAGCCTCGTGCCGTGTCGCGGAAAGTCAGGTAAACCTTATCACTTAGAGGAAGGAGAAGTCGTAACAAGGTTTCC
389	c19ee1dad5fc576688b69e8fa0510a2f	OTU_389	136	952	8	GTCGCACCTACCGATTGAATGGTCCGGTGAAATCTTAGGATCGTGGCATCGTCTTACTTTCGGGTAAGACTTTGCTGTGAGAATTTGATTAAACCTTACCATTTAGAGGAAGGTGAAGTCGTAACAAGGTTTCCGT
390	b7dce79321148e4ded9ef214eba8f696	OTU_390	131	951	11	CGTCGCTCCTACCGATTGAGTGATCCGGTGAATAATTCGGACCGACGTCTTATTTGGTTCGCCGAATTCGATGTTGGAAAGTCTAGTGAACCTTATCACTTAGAGGAAGGAGAAGTCGTAACAAGGTTTCC
391	ee44cf37a4df88b7d0a306bf454b3934	OTU_391	131	951	17	CGTCGCACCTACCGATTGAATGATTCGGTGAGATTTCCGGAACGCCTCGATGCAACCTCACGGGAGTGTCGGGGTGTGAAGCTACTCAAACCTCATCATTTAGAGGAAGGTGAAGTCGTAACAAGGTTTCC
392	cf2b74490136717adef5c7490afcf78c	OTU_392	103	950	11	GTCGTTTCTTTCGACTGATACTCATTGTGAATTACGGGGAGATCCTGTCGAACCGTTGTGAATGCTGGGTATTGGAGAAAGAAAAAGTCGTAACAAGGTTATC
393	d21a472b35011e861a0556a8fe64cc31	OTU_393	136	948	15	GTCGCTCCTACCGATTGAATGATCCGGTGAGGCCCCCGGACTGTGGCAACGCAGCTGGTTCGCCAGCCGCGATGCCGCGGGAAGCTGTCCAAACCTTATCATTTAGAGGAAGGAGAAGTCGTAACAAGGTTTCCGT
394	fd5e8b32976564e7e4885ec33d3b4a1a	OTU_394	132	946	10	GTCGCACCTACCGATTGAATGGTCCGGTGAAATCTTCGGATCTGAGAGATGTTGGATTCATTTCTGACGCCTTTTAGAAAAGTTGCTTAAACCTTATCATTTAGAGGAAGGTGAAGTCGTAACAAGGTTTCC
395	1de252fc39747b72d7e242f4fe8e075a	OTU_395	131	944	19	CCGTCGCTCCTACCGATTGAGTGATCCGGTGAATCATTCGGACCGCAGCAGAACCCAGTTCCTGGGCACTGCAGTGGGAAGTTTCGTGAACCTTATCACTTAGAGGAAGGAGAAGTCGTAACAAGGTTTCC
396	5d17e338885b1ec761b34b9d7ab0da20	OTU_396	105	939	6	GTCGTTTCTTCCGACTGATACTCATTGTGAGTTGCAAAGATTCTACTTGAAAAATTGCTGCGAATGCTTTGTATTGGAGGAAGAAAAAGTCGTAACAAGGTTATC
397	7782e36da2fda468eb1cf9c66ae412d3	OTU_397	108	938	1	GTCGCTACTACCGATTGAATGGTCTAGTGAGGCCTCCGGATTGCATTTATGCGAGATGTTGGACAAACTATATCATTTAGAGGAAGTAAAAGTCGTAACAAGGTTTCC
398	88e30224ad1fefd37deb97568d76d6e6	OTU_398	132	935	24	GTCGCACCAATTGATTGGATGACTCGATGAAAAATCAGGACTGAGATTTCTTTTGCTTCATTGCAGAGGAAGTTTTGGGAATCTTTTTAAATCTCGTTATCTAGAGATTGGTGAAGTCGTAACAAGGTTTCC
399	903bddb3b827f681ba5966ce52c5d27a	OTU_399	132	930	8	GTCGCACCTACCGATTGAATGGTCCGGTGAAATTTTCGGACCGCGTCAATGTCGCCTTTATTGGAGACGCTGCCGTGGGAAGTTACTTAAACCTTACCATTTAGAGGAAGGTGAAGTCGTAACAAGGTTTCC
400	1f3b8dc4dba86cb87e5eeb392125f1c7	OTU_400	131	930	10	CGTCGCACCTACCGATTGAGTGATCCGGTGAAGCCTCGGGATTGTGGCTTGTTTCCTTTATTGGAACCTTGCCGTGAGAACCTGTCTAAACCTTATCACTTAGAGGAAGGTGAAGTCGTAACAAGGTTTCC
401	704443ae9b5c011b20b376bd7a6ef40b	OTU_401	132	928	2	GTCGCTACTACTGATTGGATGTTTAAGCGAGACTTTTGGATGCGTGGTCTTTGTTTTTCAAACAAATAGACTAGTGCGGAATTAAGTCTAGCTTTGGTGTCTAGAGGAAGTAAAAGTCGTAACAAGGTTTCC
402	ae9958ebd18f34fe82b69a3a6cfe7e7e	OTU_402	110	924	2	GTCGCTCTTACCGATGGACTTCTCTGTGAGTTTGAGGGACTAAACAATACTGTTGGAAACTTAAACGAACAGTGTGGTCTAAAGGAAAGAGAAGTCGTAACAAGGCATCG
403	7bf5f0bd406ff08e30e28381fcd69881	OTU_403	131	923	7	GTCGCTCCTACCGATTGAGTGGTCCGGTGAGGCTTTGGGAGAGCCGGATGGATTGTGTTTCACAAACCGTTTGGCTTGAACTTAGTCAAACCTTACTACTTAGAGGAAGGAGAAGTCGTAACAAGGTTTCC
404	b39e52d21f8edcd3cc891ff4376635ed	OTU_404	124	919	1	GTCACGTCTTGGAAATTAGTTTGGCTGAAAGTGTTGAGGAAGGTAAATAATTAAATTTTGACTATTTATTGTGAATCTTCTAAGGTAGAGCTGGTAACTGAGGCGAAGTCGTAACAAGGTAGTG
405	f310f29b23cf75e1310dd3f47e156405	OTU_405	131	914	1	CGTCGCACCTACCGATTGAATGGTCCGGTGAAGCCTCGGGATTGTGGCTAGTTCCCTTCATTGGGAGTTTGTCGCGAGAACTTGTCTAAACCTTATCATTTAGAGGAAGGTGAAGTCGTAACAAGGTCTCC
406	11a72b2ff6f7f82ad92069605e42c087	OTU_406	106	914	15	GTCACACCATGGGAGTTGGTTGCACCAGAAGTGGGTTGTCTAACCTTCGGGAGGACGCTTACAACGGTGTGGTCAATGACTGGGGTGAAGTCGTAACAAGGTAGCT
407	1c86e897a5d6cbd54858315548e8852a	OTU_407	123	914	2	GTCGCTCCTACTGATTGGGTGATCCGGTGAGCTGTTCGGCCATAGCAATGTTTCTTGAGCAGGGCAATGAATGTTTTGCAAACCTTGCCACTTAGAGGAAGGAGAAGTCGTAACAAGGTTTCT
408	788ed63e8066a91fd3937147c653eeb8	OTU_408	131	908	4	CCGTCGCTCCTACCGATTGAGTGATCCGGTGAATAATTTGGACTGCAGCAATGCTTGGATCCCAAACACTGCAGCGGAAAGTTTAGTGAACCTTATCACTTAGAGGAAGGAGAAGTCGTAACAAGGTTTCC
409	58ffdff026ed9eae9592250139da9eff	OTU_409	106	907	7	GTCGTTTCTTCCGACTGATACTCATTGTGAGTTGCAAGGATCCTTCATTGGAGAATTGCCGCGAATGCTTTGTATTGGAGGAAGAAAAAGTCGTAACAAGGTTATC
410	8afac727665a13c973b58d22b941bb30	OTU_410	136	899	8	GTCGCTACTACCGATTGGATGGTTTAGTGAGATCCTCGGATTGGTCCTGGCGTGGCGGGTCACCGCCGTGCCAGTGTGCCGAGAAGACGATCGAACTTGATCATCTAGAGGAAGTAAAAGTCGTAACAAGGTTTCC
411	a143e3dab35f899571ca9adf619e4a2d	OTU_411	120	897	1	GTCGCTGCTACCGATTGAGTGGTCCGGTAAACCTTCTTGACCGTGCTGGTCTCGAACCAGTTGCGGGAAGTTAAGTAAACCTTATCACTTAGAGGAAGCAGAAGTCGTAACAAGGTATCT
412	f5541c7346a3ff512d140df27122e23b	OTU_412	145	896	2	GTCACACTATGAAAGTGAATCGTATTCAAAGAAATTGTTCTTTTTTTTACCTATATCACTTTTCCATTTATTGATGTGATGTCGTACTTAAAAGATGTTTTTACAATTCTGTTCATGATTGTAGTGAAGTCGTAACAAGGTAGCT
413	4948e47015808c04c86e81532535d66d	OTU_413	136	892	1	GTCGCTCCTACCGATGAATGTTAAGATGAAAATTTCGGAGGGGTCCGATGACCCGGGCTTGCCCGGCGATCTGGTATCGCAAAGTTGCTTGAATCTGAACATTTCGAGGAAGGAGAAGTCGTAACAAGGTTTCCGT
414	ef2a9c618622d22cdc5e79084cc60768	OTU_414	145	892	2	GTCGCTCCTACCGATGTTTGGTCCGGTGAAATCTTAGGATTCGTAGCATACACTTGTTTGCACTCTTTTGTGGAGATGAGTTTGCTGTGGAGAATTTGAGTAAACCTTGCCAATTAGAGGAAGGAGAAGTCGTAACAAGGTATTC
415	da5ad85b9def27d8834d3dea1bd49fe6	OTU_415	108	891	8	GTCACACCATGGGAGTTGGATTCACCCGAAGGCGCTGCGCTAACCCGCAAGGGAGGCAGGCGACCACGGTGGGTTCAGCGACTGGGGTGAAGTCGTAACAAGGTAGCC
416	b986b20bcb9d2b18fe644ab73298d562	OTU_416	132	889	8	GTCGCTCCTACCGATTGAGTGGTCCGGTGAGGCCTTGGGAGGGCTAAGTGGACTGTGTCTTCATGGACCGCCTGGCCCGAACCTGGTCAAACCTTATCACTTAGAGGAAGGAGAAGTCGTAACAAGGTTTCC
417	05d02c8736aeec6168b48045a505d7a7	OTU_417	136	886	4	GTCGCTACTACCGATTGAATGGTTCAGTGAGATAATCGGATAGGTAACTCGGTAAGCAGCAATGTTTACCAAGCATACATAGAAGACGATCAAACTCAGTCATTTAGAGGAAGTAAAAGTCGTAACAAGGTTTCCG
418	ebf267983507653256580a6172c88b8b	OTU_418	106	882	23	GTCACACCATGGGAATTGGCTTTACCCGAAGGTAGTGTGCTAACCGCAAGGAGGCAGCTAACCACGGTAAGGTCAGTAACTGGGGTGAAGTCGTAACAAGGTAGCC
419	1a05bc4618a091ab18e706a02e61468a	OTU_419	110	881	13	GTCGCTCTTTCCGATTAGTACGTTTGATTTACAGTTGACGACATCTTATTTTCGGTTGATGCCTTTATGTTGTAGTGTGGAGAGGAAGGAAAAGTCGTAACATGGTTTCC
420	26e100bd5459ac48a191aed7eb95245d	OTU_420	133	881	14	GTCGCTCCTACCGATTGAATGATCCGGTGAGGCCCCCGGAATGTGGTCACGGCTTCGGTTCGCCGAACTGAGATCGCGTGAAGCTGTCCAAACCTTATCATTTAGAGGAAGGAGAAGTCGTAACAAGGTTTCC
421	6a73668e63c57a87986a9e5bf89d9589	OTU_421	106	879	13	GTCACACCATGGGAGTCAGTTGCTCTAGAAGTCGGTGAGCTAACCTTCGGGGGGCAGCCGCCTAAAGAGTGACTGGTAACTGGGGTGAAGTCGTAACAAGGTAACT
422	251d981c03642add19b10fdf18f2256c	OTU_422	136	879	9	GTCGCTACTACCGATTGAATGGTTTAGTGAGGACTCCTGATTGGCGCCGCCGCCCCGGCAACGGAGCAGCGGACTGCCGAAAAGTTGTTCAAACTTGATCATTTAGAGGAAGTAAAAGTCGTAACAAGGTTTCCGT
423	89edd96d860ab3bf1f2a6f4c44ab5844	OTU_423	139	878	1	GTCGCTACTACCGATTGAGCAGTCCAGTGAGGCCTTTGGACTGACATACGTTAGCAAGCTTTCGGGTTTTGCTGTCGGTGTTCAGGAATTTGTCCAAACTTGACCGCTTAGAGGAAGTAAAAGTCGTAACAAGGTTTCC
424	18c22f445da1b09fee4963a5549ef0ee	OTU_424	132	876	1	GTCGCTACTACCGATTGAATGGCTCAGTGAGGTCTCCGGACTGGCTCAGGGAGGTTGGCGACGACCACCCAGGGCCGGGAAGCTGATCAAACTTGGTCATTTAGAGGAAGTAAAAGTCGTAACAAGGTTTCC
425	28370ffd20bf615c741f381f6c49eaf5	OTU_425	132	875	4	GTCGCTACTACCGATTGAATGGTTTAGCGAGATTCTCGGATTGGACCATGCCCGTGCGTAAGCATGAGCAAGGACTGAGAAGAAGTTCAAGCTTGATCATTTAGAGGAAGTAAAAGTCGTAACAAGGTTTTC
426	4313c9b4d81e20c02e242203708537aa	OTU_426	136	875	16	GTCGCTCCTACCGATTGAATGATCCGGTGAGGCCCCCGGACTGGGGCGACGCATTCGGTTCGCCGGACGCGACGCTCCGGGAAGCTGTCCAAACCTTATTATTTAGAGGAAGGAGAAGTCGTAACAAGGTTTCCGT
427	6071f7cfbd3f9a2f4fbdefb1f520a39a	OTU_427	131	875	6	GTCGCTACTACTGATTGGGTGTTCAAGTGAGATGCTTAAACCCTTGTTTGCATGGTTCAATATTGTGCGGCGAAAGGAAAAAGTTTCAAGCTTGAGTGTCTAGAGGAAGTAAAAGTCGTAACAAGGTTTCC
428	6f22822b0c4350377321296633b4be48	OTU_428	136	873	2	GTCGCTACTACCGATTGAATGGTTTAGTGAGACCTTCGGATTGGAGCCGCCGTGACGGGCAACCGCCGCGGCGGATTTCGAGAAGTCGGCCAAACTTGATCATTTAGAGGAAGTAAAAGTCGTAACAAGGTTTCCG
429	e6dace5a2ed442afda0b2570eab5349c	OTU_429	107	871	15	GTCACACCATGGGAGTTGGTTTTACCCGAAGCTGGTGAGCTAACCTTTTAGGAGGCAGCCAACCACGGTAGAGTCAGCGACTGGGGTGAAGTCGTAACAAGGTAGCC
430	e832aa290d834135f4c12c944fcede40	OTU_430	108	871	3	GTCACATCACGAAAGTCGGCTGTACCGGAAGCCGGTGGGCCAACCCGCAAGGGGGGCAGCTGTCGATGGTATGGTCGGCGATTGGGGTGAAGTCGTAACAAGGTAGCT
431	2d8fb4ad74615a0ba9fdee4b658d253f	OTU_431	131	871	13	CGTCGCACCTACCGATTGAATGGTCCGGTGAAGCCTCGAGATTGTGACCAGTTTTCTTTACCGGAGGTTGGTTGCAAGAACTTGTCTAAACCTTATCATTTAGAGGAAGGTGAAGTCGTAACAAGGTTTCC
432	1130e05812afa616d3500f57907fb0bf	OTU_432	131	870	14	GTCGCTCCTACCGATTGGATGTTTCGATGAGCCGTTCGGAGGAGACTGCTGAAGGCGTAAGCTCGGAAGCAGTTTCCAAAGTTCTGCAAATCTGAATATCTAGAGGAAGGAGAAGTCGTAACAAGGTTTCC
433	0db1c793a803e7141de0e973544e4eaa	OTU_433	131	868	5	CCGTCGCTCCTACCGATTGAGTGATCCGGTGAATAATTCGGACTGCAGCAGTGTTCGGTTCCTGAACGTTGCAGCGGAAAGTCTAGTGAACCTTATCACTTAGAGGAAGGAGAAGTCGTAACAAGGTTTCC
434	0e9b5d0de00dc5aab758b271712d7d16	OTU_434	136	865	10	GTCGCTCCTACCGATTGAAATCAGCGATGAAATTTTCGGAGAGTAGCTTTGCGTCTGGTTCGCTGGACAAAACGTCGCTCGAAGTCACTTGAATCTCTGATTTTAGAGGAAGGAGAAGTCGTAACAAGGTTTCCGT
435	373ac5e4f066ef9c1b22e2e9c476b8fa	OTU_435	131	861	3	CGTCGCTACTACCGATTGAATGGTTTAGCAAGGTCTTCGGATTGGCACCTGAGCGGTTCGCTGCTCTCGGTGTCCGAGAAGATGATCAAACTTGATCATTTAGAGGAAGTAAAAGTCGTAACAAGGTTTCC
436	25adfa544afb12845dc7cf0c21b497b1	OTU_436	132	855	11	GTCGCTACTACCGATTGAATGGTTTAGTGAGGTCTCCTGATTGGCGCTCCGCAGCTGGCAACAGCAGTGGGATGCTGAGAAGTTGATCAAACTTGATCATTTAGAGGAAGTAAAAGTCGTAACAAGGTTTCC
437	20103694dddd38c827049b6b2854b403	OTU_437	131	850	4	CCGTCGCTCCTACCGATTGAGTGATCCGGTGAATAATTCGGACTGTAGCTTGGCCCAGCTTCTGAGTCTTGCAGCGGAAAGTTTGGTGAACCTTATCACTTAGAGGAAGGAGAAGTCGTAACAAGGTTTCC
438	15ba90e9baa8f7a9e95deb0a0eb9ed2d	OTU_438	116	849	1	GTCGCTCCTACCGATTGAGTGTTCCGGTGAATTATTCGGACTGCAACAGTTATCTGTCGCGGAAAGTCTTGTGAACCTTAACACTTAGAGGAAGGAAAAGTCGTAACAAGGTTTCC
439	62975506e1e7afbc23ac752d7ed5fc10	OTU_439	137	848	1	GTCGCTACTACCGATTGAATGGTTTAGTGAGGCCTCCGGATTGGCACTGTCGGACGGGCTTCGGTTCGTCCGACGGACGTCAAAAAGTTGGTCAAACTTGATCATTTAGAGGAAGTAAAAGTCGTAACAAGGTTTCC
440	4457586c83ad6814dde5e02aefa88882	OTU_440	131	848	18	CCGTCGCTCCTACCGATTGAGTGATCCGGTGAATAATTCGGACTGATGCAGTGCTCAGCTTCTGAACTTTGCATTGGAAAGTTTAGTGAACCTTATCACTTAGAGGAAGGAGAAGTCGTAACAAGGTTTCC
441	353a31a60bef81bf60ac3c1e58a384b2	OTU_441	136	847	1	GTCGCTACTACCGATTGAATGGTTTAGTGAGAATTTTGGACTGGAGCTTTCTTGTTCAGCAATGAACGAGAGAGAGTCCGGGAAGTCATTCTAACTGTATCATTTAGAGGAAGTAAGAGTCGTAACAAGGTTTCCG
442	cee135407a9a8524903bfa89ef5a35f6	OTU_442	131	847	6	CGTCGCTCCTACCGATTGAGTGATCCGGTGAATAATTCGGACCGACGCCCTGCTTGGTTTTCCAGGCTAGGTGTTGGAAAGTCTAGTGAACCTTATCACTTAGAGGAAGGAGAAGTCGTAACAAGGTTTCC
443	a101ddc431762d49b3f540addf4280e2	OTU_443	131	842	7	CGTCGCACCTACCGATTGAATGGTCCGGTGAAGCCTCGGGATTGTGGCGAGTTCCCTTTATTGGGAGTTTGTTGCGAGAACTTGTCTAAACCTTATCATTTAGAGGAAGGTGAAGTCGTAACAAGGTTTCC
444	71de6f8e10ffa77a63fed961aadbf6bf	OTU_444	127	842	12	GTCGCTCCTACCGATTGGATGATCCGGTGAGCTATTCGGACCTACGCCTTGTCGATTTTCGGCTTTGTGTGGGAAAGTCTCGCGAACCTTATCATCTAGAGGAAGGAGAAGTCGTAACAAGGTTTCC
445	933e5625ee798b9d53fafc51e53963e2	OTU_445	125	841	14	GTCGCTCCTACCGATTGAGTGATCCGGTGAATAGTTCGGATCGTGCAGGTTGCCTTCGGGTGCTTGTATGAGAAGTTCAGTAAACCTTATCACTTAGAGGAAGGAGAAGTCGTAACAAGGTTTCC
446	8eea0581d5171c7ff32517145c266b0a	OTU_446	120	840	13	GTCGCTGCTACCGATTGAGTGATCCGGTAAACCTTCTGGACTGCGCGAGCCTCGAGCTTGTTGCGGGAAGTTAAGTAAACCATATCACTTAGAGGAAGCAGAAGTCGTAACAAGGTATCT
447	3ef12eea1ce9d2e93f1b66eadcb138db	OTU_447	131	840	5	CCGTCGCTCCTACCGATCGAGTGATCCGGTAAATAATTCAGACTTGTGCAATGGTTGGCCTCCGAGCATTGCAATATAACGTTGTGTAAACCTTATCACTTAGAGGAAGGAGAAGTCGTAACAAGGTTTCC
448	efd00acc2c58c51a24115b9363fa894f	OTU_448	131	840	1	CGTCGCTCCTACCGATTGAGTGATCCGGTGAATAATTTGGACATCTGCTTGCCTGCAGGCTGCTGACAAGCTAGCTGTAAGTTTAGTGAACCTTATCACTTAGAGGAAGGAGAAGTCGTAACAAGGTTTCC
449	056cd98f1078f4639f08978045ede2fa	OTU_449	127	838	3	GTCGCTCCTACCGATTGGATGATCCGGTGAGCTATTCGGACCTTTGCTTCGTCGATTTTCGGCTTTGTGAGGGAAAGTCTCGCGAACCTTATCATCTAGAGGAAGGAGAAGTCGTAACAAGGTTTCC
450	8bf05ea87306f8c3331b867e35704245	OTU_450	136	838	1	GTCGCTAGTACCGACTAGTTGGTTTAGTGAATCACTTGGATCTATAGTTAGCTTGCGGAGCAATTCGCAACTTGCCGTGGAGAAGACTGGTAAACTTGATCAACCGGAGGAACTAAAAGTCGTAACAAGGTCTCCG
451	0e417f6e70e6e0d3c81d0db22bc3a8a7	OTU_451	131	838	11	GTCGCTACTACCGATTGAACGTTTTAGTGAGGTATTTGGATTGGAATTGATCGGAGATTTTTCCGCTGCAGTTCCGAGAAGACTCCCAAACTTGAGCGTTTAGAGGAAGTAAAAGTCGTAACAAGGTTTCC
452	9cd178bfa6c8cb09bd657971a05c96af	OTU_452	131	835	17	GTCGCTACTACCGATTGAATAATCCGGTGAAATCTCGGGACCGCGGACTCAAGCGGGGCAACCTGCTAGGTCTGTGGGAACTTGAGTAAACCTTATTATTTAGAGGAAGTAAAAGTCGTAACAAGGTTTCC
453	9ec4ee42380a8ade4a2dabb966b51405	OTU_453	136	830	2	GTCGCTACTACCGATTGAATGGTTTAGTGAGATCTTCGGATTGGCGCCATCGTGGCTTCACGGCCGTGACGGACTGCCGAAAAGTTGCTCAAACTTGATCATTTAGAGGAAGTAAAAGTCGTAACAAGGTTTCCGT
454	2392907179e85936303ce5f757ece9ed	OTU_454	131	826	11	CGTCGCACCTACCGATTGAATGGTCCGGTGAAGCCTCGGGATTGTGGTCAGGTTGCTTTATTGGAATCTGACTATGAGAACCTGTCTAAACCTTATCATTTAGAGGAAGGTGAAGTCGTAACAAGGTTTCC
455	ca29fd934cb5a3b446ac00fbb97cd4c9	OTU_455	131	826	6	CGTCGCACCTACCGATTGAATGGTCCGGTGAAGCCTCGAGATTGTGGTTTTCTTCCTTTATTGGACGGTAACCACGAGAACTTGTCTAAACCTTATCATTTAGAGGAAGGTGAAGTCGTAACAAGGTTTCC
456	55df871a858a775fef31daa34ed566ec	OTU_456	116	822	6	GTCGCTGCAACTGATTGGAAGGATTTGTGAGTATTTTGGAGTTAAGTTTTCTAAATGATTTTAAAAAATTCTAGCTATATCTTTCTAGAAATTGCAAAAGTCGTAACAAGGTTTCC
457	50cf82b45fe1aa24f29de8ab6395ea22	OTU_457	131	821	8	GTCGCTCCTACCGATTGAGTCATCCGGTGAGCAGTTTGGATTGCGATTAGGTCGTGGCTTGCCACTCCTAGTTGCGAGAAGCTCTGCGAACCTTGTGACTTAGAGGAAGGAGAAGTCGTAACAAGGTTTTC
458	337452e0b54a56b488f4956b209d32d4	OTU_458	136	819	12	GTCGCTCCTACCGATTGAATGATCCGGTGAGGTCTTTGGACTGAGGCGACGCAGACGGTTCGCCGCCCGCGACGCCCTGGGAAGCTGCCCAAACCTTATCATTTAGAGGAAGGAGAAGTCGTAACAAGGTTTCCGT
459	ab9f2c2d3873f3a9667683030abe5a56	OTU_459	136	817	2	GTCGCTCTTACCGATGGACTTCTCTGTGAGTTTGAGGGACTGGGTACTGCCGTGGATTTATCCATTGGCTATCACCTATGGAAACTTAAACGAACAGTGTGGTCTAAAGGAAAGAGAAGTCGTAACAAGGCATCGG
460	6ec67ae010192eac32d993354d805fab	OTU_460	104	816	7	GTCGTTTCTTCCGACTGATACTCATTGTGAATTACGAGGATGCGTTAGCAAAATCGTTGTAAATGCTGGGTATTGGAGGAAGAAAAAGTCGTAACAAGGTTATC
461	8c9f538ebccb538f7054109d684d9a27	OTU_461	139	814	1	GTCGCTACTACCGATTGAATGGTTTAGTGAGGCCCTCGGACGTTCCCCGGGCTGTGCCTTCGGGCACGGTCGCAGGTGCGTGGCGAAAGATGGTCGAACTTGATCATTTAGAGGAAGTAAAAGTCGTAACAAGGTTTCC
462	e913e3bc44c22ec05811303da5639f61	OTU_462	128	813	3	GTCGCATCTATCGATTAGGTTGTATCATGAGTTAGGTGGAGGTTATATAAAAGAAGTTTTTCTTTTATATTTCTTAAACTTTGCAAATGGTACTGCCCAGAGACAGATAAAGTCGTAACACGGCAACT
463	8070fd4a70bdf6a06ab26d8c794d0d52	OTU_463	133	812	1	GTCGCTACTACCGATTGAATGGCTTAGTGAGGACTTGGGAGAGTACATCGGGGAGCTGGAAACAGCACCCTGACGGCTCAAACTCTTACAAACTTGGTCATTTAGAGGAAGTAAAAGTCGTAACAAGGTATCT
464	a6372f94aacbdc54de850fa5d70ff78d	OTU_464	131	812	1	GTCGCACCTACCGATTGAATGATTCGGTGAAAATTTCGGACCGGCTCACTGTGCCTTCACTGGTTACGGCGAGGTGGGAAGTTATTTAAACCTCATCATTTAGAGGAAGGTGAAGTCGTAACAAGGTTTCC
465	d8e8f83ae7c117c7c6013458973fdc13	OTU_465	136	810	1	GTCGCTACTACCGATTGGATGGTTTAGTGAGGTCCTCGGATCGGCCCCGCCGGGGTCGGTCACGGCCCTGGCGGAGCGCCGAGGAGACGATCAAACTTGACTATCTAGAGGAAGTAAAAGTCGTAACAAGGTTTCT
466	06550c3a8ea8244facc00753238a083c	OTU_466	128	808	13	GTCGCTCCTACCGATTGAGTGATCCGGTGAATAATTCGGACTGATCGCGTAGCCGGCAACGGCTGCGCTTTCGGAAAGTCTAGTGAACCTTATCACTTAGAGGAAGGAGAAGTCGTAACAAGGTTTCC
467	8c6f1dbcd52023ab0a63c1b455ff7cbe	OTU_467	107	808	15	GTCACACCACGAAAGTTGAATTGACCCGAAGTCGTGCACCTAACCCTTGTGGAGGGAAGCGCCTACGGTTGGTTCGATGATTGGGGTGAAGTCGTAACAAGGTAGCT
468	aaed0be63ee7be7fd72f81c7b893cadc	OTU_468	131	803	13	CGTCGCACCTACCGATTGAATGGTCCGGTGAAGCCTCGGGATTGTGGGTAGTTCCCTTTATTGGGAGTTATTCGCGAGAACTTGTCTAAACCTTATCATTTAGAGGAAGGTGAAGTCGTAACAAGGTTTCC
469	77479a2613c966348205eed5d34da8d4	OTU_469	134	802	1	ATCGCTCCTACCGATTGAATGGTTCAGTGAAGTGCTCAAATCATGGTGACATTGGTGGTCTACCACTAACGATACTACAAAAAGTCCATTGAACCTTATCATTTAGAGGAAGGAGAAGTCATGACAAAGTTTCT
470	093b169f8e23ca943d9a371dcf5ee22d	OTU_470	132	800	2	GTCGCTACTACCGATTGAATGGTTTAGCGAGATCCTCGGATCGAGCCCTGCCCGCGCGTCAGTGTGGGCTAGGCTTGAGAAGAAGCTCAAGCTTGATCATTTAGAGGAAGTAAAAGTCGTAACAAGGTTTTC
471	5b1ea6fd745efcd5212914af4c051129	OTU_471	108	798	12	GTCACACCATGGGAGTTGGGTTCACCCGAAGGCGTTGCGCTAACTCGCAAGAGAGGCAGGCGACCACGGTGGGCTTAGCGACTGGGGTGAAGTCGTAACAAGGTAGCC
472	3f3d7ae34280ded4e73ecd8958eec6d4	OTU_472	132	798	3	GTCGCACCTACCGATTGAATGGTCCGGTGAAATCTTCGGATCTGAGAGATATTGGATTCATTTCTGACGTCTTTTAGAAAAGTTGCTTAAACCTTATCATTTAGAGGAAGGTGAAGTCGTAACAAGGTTTCC
473	cc65e928c7b68f81f8beacbfdb2c15b4	OTU_473	128	798	18	GTCGCACCTACCGATTGAATGGTCCGGTGAAGCCTCGGGATTGTGGCCTTTTGCTTTATTGCGATGGGTCGCGAGAACTTGTCTAAACCTTATCATTTAGAGGAAGGTGAAGTCGTAACAAGGTTTCC
474	0275b1638d3e5fd6528524cfc1603335	OTU_474	104	795	8	GTCGTTTCTTCCGACTGATACTCATTGTGAATTACGAGGAGGCGCAAGCCAAATCGTTGTAAATGCTGGGTATTGGAGGAAGAAAAAGTCGTAACAAGGTTATC
475	dc95536c12a7fc8d8c1e8797a0a2da04	OTU_475	143	793	2	GTCACGCCATGGGAATTGGTTTGATTAGAAGTGGTATAGGCTTAGATCCTGATTTCTTTTAATTTTTTTTAAAGCTTATCGTATCTTAGTACTAATCACGACAATTAGATTAAGGACTGGGGTGAAGTCGTAACAAGGTAGCG
476	33fd2f0e4735e44c3b24cd5a2e8ce0e7	OTU_476	138	792	3	GTCGCTACTACCGATTGAGTGGCTTAGTGAGGGCTCTGGATCTCCGCCGCCTCTCCCAGCGATGGGAGGGGCGGATGTTTGGGAGAAGTTGTCCTAACTGATTCACTTAGAGGAAGTAAAAGTCGTAACAAGGTTTCC
477	028a85c62a9d0b34dbbf2e0a80108844	OTU_477	106	792	5	GTCACACCATGGGAGTTGGGTTTACCCGAAGGCCGTGCGCCAACCTTTTGGAGGCAGCGGACCACGGTGAGCTCAGCGACTGGGGTGAAGTCGTAACAAGGTAGCC
478	280c358f5d081fd982d1f0e2253481aa	OTU_478	106	791	1	GTCACACCATGGGAGTTTGTTGCACCAGAAGTAGGTAGTCTAACCGCAAGGAGGACGCTTACCACGGTGTGGCCGATGACTGGGGTGAAGTCGTAACAAGGTGGCC
479	52119c451a7d3122b1362278baf89f86	OTU_479	137	789	2	GTCGCTACTACCGATTGGATGGTTTAGTGAGATCTTCGGATTGAAGTGCTGTGGAGAGTCTTTGGCTTTCCGTGCTATTTTGAGAAGAGGATCAAATTTGATCATCTAGAGGAAGTAAAAGTCGTAACAAGGTTTCC
480	632588e3bfa0004ae901ed8e6a6aacbc	OTU_480	132	786	1	GTCGCTACTACCGATTGAATGGCTTAGTGAGGTCTTCGGATTGGCTTTGGGGAGCCGGCGACGGCGCCTTATTGCTGAGAAGTTGATCAAACTTGGTCATTTAGAGGAAGTAAAAGTCGTAACAAGGTTTCC
481	c18d51aa1c8205622e7f327c2d6f2641	OTU_481	126	786	9	GTCGCTCCTACCGATTGAGTGATCCGGTGAATACTTGGGACCGCGTCAAGCTCAATTTTGGGCTCGATGTGGAAACTTGAGTGAACCTTATCACTTAGAGGAAGGAGAAGTCGTAACAAGGTTTCC
482	dfd876a9c873ea639b78712eea2562c2	OTU_482	136	786	3	GTCGCTACTACCGATTGAACGGTTTAGTGAGGTCCTCGGATTGGTCTCGGCCCGCCCTTAACCGGGCGGCGCCGTTGGTCGAGAAGACGCCCGAACTTGATCGTTTAGAGGAAGTAAAAGTCGTAACAAGGTTTCC
483	264596c895032eae59ebeb39cf440ec1	OTU_483	128	785	14	GTCGCTCCTACCGATTGAGTGGTCCGGTGAATAATTCGGATTGCGTCTTATTTCAGACTTGGGATTTGACGCGAGAAGTCTAGTAAACCTTATCACTTAGAGGAAGGAGAAGTCGTAACAAGGTTTCC
484	68d963374a3b8a6fa382c30c9dfaaa02	OTU_484	132	785	13	GTCGCTACTACCGATTGAATTGGGAAGTGAGGTCTCGGGAGTGATATGTTGACGAGCGCAAGTGAGTCGACACGTTGCAAACTTGATCAAACTTGTCTGTTTAGAGGAAGTAAAAGTCGTAACAAGGTATCC
485	e385fcc703b158f63351b5bad3f875da	OTU_485	133	784	8	GTCGCACCAACCGATTGGATGTTTTGTTGAAATATGTGGATATCTTTGTATACGGTTTGATTACTGTTGTGCGAGGGTAGAAGTGTATTAAAACTGAATATCTAGAGGATGGTGAAGTCGTAACAAGGTTTCC
486	07e3da119fea715a18c19acf56cf5517	OTU_486	131	783	2	CCGTCGCACCTACCGATTGAATGATTCGGTGAAACCTCCGGACCTGCGCGGGAGGCCTTCGGGCACTCCTGCGCGGGGAAGCTGTTTAAACCTCATCATTTAGAGGAAGGTGAAGTCGTAACAAGGTTTCC
487	84e68d8f5d41970a0a1d647e576b74fb	OTU_487	136	780	2	GTCGCTACTACCGATTGAACGGTTTAGTGAGATCCTTGGATTGGTCCCGGCATGGCGGGCGACCGCCGCGCCGGTGCGCCGAGAAGACGATCAAACTTGATCGTTTAGAGGAAGTAAAAGTCGTAACAAGGTTTCC
488	605afd28953dac8f1c3988464b7fd56a	OTU_488	136	779	1	GTCGCTACTACCGATTGGATGGTTTAGTGAGGTCCTCGGATTGGTCCGGGCTTGGCGGGCAACCGCTTTGCCGAGGTGCCGAGAAGACGATCGAACTTGACGATCTAGAGGAAGTAAAAGTCGTAACAAGGTTTCC
489	5a40634c745a83082e87c60dca683a5e	OTU_489	131	779	1	CGTCGCTACTACCGATTGAACGTTTTAGTGAGGCATTTGGACCGACGCTTTTCAGTGTAATAGCTGGTTTGTGTTGGAAAGATTTCCAAACTTGAGCGTTTAGAGGAAGTAAAAGTCGTAACAAGGTTTCT
490	cd4471864dd26828bacf86cf4fd1cc9a	OTU_490	136	778	4	GTCGCTACTACCGATCGAACGATTTAGTGAGAGCATCGGACTGAGCCTCGTGAGACGGTTCTCTGTTTCGCGGGTGCATGGAAAGACGTTCAAACTTGATTGTTTAGAGGAAGTAAAAGTCGTAACAAGGTTTTCG
491	0bc0f191bc2dd86e43c5e3a54e48a61e	OTU_491	132	776	11	GTCGCTAGTACCGACTAGTTGGCTTAGTGAGTCACATGGAGTTGAGAGAGCAGAGGGGCAACCTGAACTCTATTCGGCAAAGTCTGGCGAACTGAACCAACCGGAGGAACTAAAAGTCGTAACAAGGTCTCC
492	1f1f0de10257f4f4615a479fdd0fae75	OTU_492	131	774	7	CGTCGCACCTACCGATTGGATGGTCCGGTGAGGAGTCGGGATTGTAGCTTGGATCCTTCATTGGGCTCAGGCCGCGAGAACCTCTCCAAACCTTATCATCTAGAGGAAGGTGAAGTCGTAACAAGGTTTCC
493	70d5f93699b71fcd91e2901654be0d26	OTU_493	128	771	8	GTCGCACCTACCGATTGAATGGTCCGGTGAAGCCTCGGGATTGTGACTTTTTGCTTCATTGCGATGGGTCGCGAGAACTTGTCTAAACCTTATCATTTAGAGGAAGGTGAAGTCGTAACAAGGTTTCC
494	373523f6d7595d659ca00945a6af5f5d	OTU_494	131	769	5	CGTCGCACCTACCGATTGAATGGTCCGGTGAAGCCTCGGGATTGTAATGAGTTTCCTTTATTGGGAATTCGTCGCGAGAACTTGTCTAAACCTTATCATTTAGAGGAAGGTGAAGTCGTAACAAGGTTTCC
495	02aae24ad79909c37054fcde2fc4f7b6	OTU_495	106	769	9	GTCGTTTCTTCCGACTGATACTCATTGTGAATTACGGGGATAGATTCGTCTAAAACTGTTGTGAATGCTGGGTATTGGAGGAAGAAAAAGTCGTAACAAGGTTATC
496	c6959cebd5d0a6e681faf5525f7fd8f9	OTU_496	115	768	5	GTCGTTGTTTCCGATGTTGGTGCAATACAGGTGTACGGACCTAGGGTGTTTACACTTTGGGGAAGTTTACCGATGTTGCTTCAGTAGAGGAAGTAAAAGTCGTAACAAGGTAGCT
497	887e93f69ed5eb0a2f9c69f36360d860	OTU_497	106	768	1	GTCACACCATGGGAGTTGATATTGGCAGAAAACGCTGAGCTAACCTTCGGGAGGCAGGTGTTCAAGCTAGTGTTGATGACTGGGGTGAAGTCGTAACAAGGTAGCA
498	97068a1b0f7c41767ab96ee7d0469904	OTU_498	131	767	1	CGTCGCTACTACCGATTGAACATTTTAGTGAGGTCCTCGGACTGTGAGCCTGGCGAGTCACCCTGCCTGGTCTACGGGAAGACGACCACACTGTAGTGTTTAGAGGAAGTAAAAGTTGTAACAAGGTTTCT
499	935cd83be778a83ac5a97e9f42d4d957	OTU_499	108	767	15	GTCACACCATGGGAGTTGGTTGGACCAGAAGTCGCTGAGCTAACCCTTCGGGGAGGCAAGCGCCCAAGGTCTGATGAGCGACTGGGGTGAAGTCGTAACAAGGTAGCT
500	7e74ac5ec8691bc0af9ae276d1decc47	OTU_500	132	767	2	GTCGCTACTACCGATTGAATGGTTTAGTGAGACCCTCGGATCCGTCCCGTCCGGCGTCCTCGCCGGCCGGCGCGCGGAGAAGACGGTCGAACTTGATCATTTAGAGGAAGTAAAAGTCGTAACAAGGTTTCC
501	57816ccc20327058ffad5e061f4bf0d5	OTU_501	131	766	10	CGTCGCTCCTACCGATTGAGTGATCCGGTGAATAATTCGGACCGACGCCCTATTTGGTTTTCCAGATTAGGTGTTGGGAAGTCTAGTGAACCTTATCACTTAGAGGAAGGAGAAGTCGTAACAAGGTTTCC
502	5f05b5484ae20b7c39bd73468e6f298e	OTU_502	133	766	5	GTCGCTACTACCGATTGAATGGTTTAGTGAGGCCTCCGGATTGGCACTGTCGGATTCGCGAGACTCTGACGGAGGCCAAGAAGTTGGTCAAACTTGATCATTTAGAGGAAGTAAAAGTCGTAACAAGGTTTCC
503	e95454d35fcafb40ec42b92c16961e71	OTU_503	132	765	3	GTCGCTACTACCGATTGAATGGTTTAGCGAGAACCTCGGATCGAGCCCTGGCCGTGCGTAAGCATGGTCGTGGCTTGAGAAGAAGCTCAAGCTTGATCATTTAGAGGAAGTAAAAGTCGTAACAAGGTTTTC
504	4dbb15f996f39fae5a4590f6f104edb0	OTU_504	138	763	1	GTCGCTACTACCGATTGGGCGATTTAGCGAGCGCCTCGGATTGGACCCGGAACGATCGGCAACGACCGTACCGCTGTGTGCCGAAAAGACGCGCAAACTTGATCGCCTAGAGGAAGTAAAAGTCGTAACAAGGTTTCT
505	4bc50edfdd4625e2a1e4e8e675755da9	OTU_505	106	762	16	GTCAAGCCATGGAAGTTGACTTTGCCTGAAATTGGTGAGCTAACCTTCGGGAGGCAGCCACTTATGGTAGAGTTGATAACTGGGGTTAAGTCGTAACAAGGTAGCT
506	ae41958165cdc978d6203fedb886b743	OTU_506	136	757	8	GTCGCTACTACCGATTGGATGGTTTAGTGAGATCCTCGGATTGGTCCTGGCCTGGCGGGCAACCGCCGAGCCAGCGTGCCGAGAAGACGATCGAACTTGATCATCTAGAGGAAGTAAAAGTCGTAACAAGGTTTCC
507	69373b349999a8b1b3fa180cf4a2c53a	OTU_507	106	756	16	GTCACACCATGGGAGTGGGTTGCAAAAGAAGTGGCTAGTCTAACCTTCGGGAGGACGGTCACCACTTTGTGATTCATGACTGGGGTGAAGTCGTAACAAGGTAGCC
508	58b97bc1b5443edf021a627b0059e07e	OTU_508	131	756	9	CGTCGCACCTACCGATTGAATGGTCCGGTGAAATCTCGGGATTGTGGCCAGTTCACTTTATTGGGAGTTGGCTGCGAGAACTTGCTTAAACCTTATCATTTAGAGGAAGGTGAAGTCGTAACAAGGTTTCC
509	a0f06ff65c1f93a44c30b77e2275473e	OTU_509	127	753	1	GTCGCTCCTACCGATTGGATGATTCGGTAAGCTTTTGAGATTGAATGGTCTCGCCATGTGCTACGCCATTCGCGAACTTAATCAAACCTAATCATCTAGAGGAAGGAGAAGTCGTAACAAGGTTTCC
510	2f1d4184ad1c65c2768e8a61a7c5710c	OTU_510	131	753	6	GTCGCTACTACTGATTGGGTGTTCAAGTGAGATGCTTAGACCCTTGCTTGTATGGTTCAATATTGTGCGGCGAAAGGAAAAAGTATCAAGCTTGAGTGTCTAGAGGAAGTAAAAGTCGTAACAAGGTTTCT
511	c1be9383b46b9d5ea142411eea789249	OTU_511	131	751	15	CCGTCGCTCCTACCGATTGAGTGATCCGGTGAATAATTCGGACCGCAGCAATGTTTGGATCCCAAGTGTTGCAGTGGAAAGTTTAGTGAACCTTATCACTTAGAGGAAGGAGAAGTCGTAACAAGGTTTCC
512	6dc47603253b2dbc881b4a1294b0e0b9	OTU_512	116	750	8	GTCGCTCCTACCGATTTTGAGTGGTCCGGTGAACCTTCTGGATTGTGCGGCTTGCCGCGCGAGAAGTTATGTAAACCTTATCACTTAGAGGAAGGAGAAGTCGTAACAAGGTTTCC
513	d3e90c47e29fd49c4fee2dc4ca7fc213	OTU_513	136	748	5	GTCGCACCTACCGATTGAATGGTCCGGTGAAATCTTTGGACCGCGTCTTCGTATTACTTTCGGGTAAAACATTGATACGGGAAGAGGATTAAACCTTATCATTTAGAGGAAGGTGAAGTCGTAACAAGGTTTCCGT
514	4f99e7c7639b50ba607f654229b22809	OTU_514	131	748	4	GTCGCTACTACCGATTGAATGATTTAGTGAGATTGTTGGATTGGATTCTAAGTGGTGTTTCACTACTAAGAGTCTGAAAAAACACTCAAACTGCATCATTTAGAGGAAGTAAAAGTCGTAACAAGGTTTCC
515	001499ab694ad963e8b7651247132234	OTU_515	137	747	4	GTCGCTACTACCGATTGGATGGTTTAGCGAGAGCCTTGGATCGGAGCCCGGGAGGTCAGCGATGGCCGCCCGGGAGTACCTGAGAAATTGCTCCAGCTTGATCATCTAGAGGAAGTAAAAGTCGTAACAAGGTTTCT
516	424bea77c0a5b34ab04b61feb0b7c7bd	OTU_516	131	746	2	GTCGCTACTACCGATTGAACGTTTTAGTGAGGTATTTGGATTGGACCTGGTTGGGTTCACGCCCTCCCTGTGTCCGAAAAGACTCCCAAACTTGAGCGTTTAGAGGAAGTAAAAGTCGTAACAAGGTTTCC
517	5706aeeb1a050913516be3d13df14e47	OTU_517	110	745	16	GTCACACCCTGGGAATCGAAGGTACTTAAAGCTATGTCTCAAGGCTTTTAGCAACTTGAGTTCTGTTAGAGTACGGTCTTTGACTGGGGTGAAGTCGTAACAAGGTAGTC
518	a728bc5eefb2353e503c025dee0c5d32	OTU_518	133	745	5	GTCGCTACTACCGATTGAATGGTTTAGTGAGATGTTCGGATTGGCGTCGCCGCTCTTAACGGAGTCGGCGTTTGTTCGAAAAGTTCATCAAACTTGATCATTTAGAGGAAGTAAAAGTCGTAACAAGGTTTCC
519	283e95966ccf11544cdde996c3e2d79e	OTU_519	136	744	5	GTCGCTACTACCGATTGAATGGTTTAATGAGATCTTCGGATTGGCTTCCTTGGTACCCTAACAGGTCCAAGGCTAGTCGAAAAGTTGCTCAAATTTGATCATTTAGAGGAAGTAAAAGTCGTAACAAGGTTTCCGT
520	3a5c9aa119682e2d1f7af613e4b1ec4f	OTU_520	131	741	14	CGTCGCACCTACCGATTGAATGGTCCGGTGAAGCCTCGGGATTGTGGTTGGTTTCCTTCATTGGAAGTTAGTCGCGAGAACTTGTCTGAACCTTATCATTTAGAGGAAGGTGAAGTCGTAACAAGGTTTCC
521	e2a0a60c543f7b722057459637933424	OTU_521	106	735	13	GTCACACCATGGGAGTGGGTTGCACCAGAAGTAGTTAGCTTAACCTTCGGGAGGGCGATTACCACGGTGTGATTCATGACTGGGGTGAAGTCGTAACAAGGTAGCC
522	8cd9bff6916de92ca87dbed7b11e14b4	OTU_522	131	731	15	CCGTCGCTCCTACCGATTGAGTGCTACGGTGAATAATTCGGACTGCAGCAACGTTCGGTTCCTGAATGTTGCAGTGGAAAGTTTAGTGAACCTTATCACTTAGAGGAAGGAGAAGTCGTAACAAGGTTTCC
523	f5f619d018f584848ea270f05bd7ef75	OTU_523	128	729	10	GTCGCACCTACCGATTGGATGGTCCGGTGAAGCCTCGGGATTGTGGCTGGTGCCTTTACTGGTGTCGGTTGCGAGAACTTGTCTAAACCTTATCATCTAGAGGAAGGTGAAGTCGTAACAAGGTTTCC
524	34cb7f142fb947d91237c68917071b53	OTU_524	141	728	3	GTCGCTACTACCGATTGAATGGTTTAGTGAGGTCCTCGGATCGGACGCGATCAGGTCTGCCTCGCGTGGGCCAGATCGCTGCGCTGAGAAGACGATCAAACTTGATCATTTAGAGGAAGTAAAAGTCGTAACAAGGTTTCC
525	c770fca68d010bdcf75058d0c5d721ee	OTU_525	137	726	2	GTCGCTACTACCGATTGAATGGTTTAGTGAGGCCTCCGGATTGGCACTGGCGGACGTGCGTCCGTTCGTCCACTGGACGTCAAAAAGCTGGTCAAACTTGATCATTTAGAGGAAGTAAAAGTCGTAACAAGGTTTCC
526	88ba81c50184213843c505d2c850c612	OTU_526	131	725	3	GTCGCACCTACCGATTGAATGGTCCGGTGAAATTTTCGGACCGTGACAATGTCACCTTCATTGGGACGCTGTCATGGGAAGTTACTTAAACCTTACCATTTAGAGGAAGGTGAAGTCGTAACAAGGTTTCC
527	95c7615eba43a036a2869d4f885474d0	OTU_527	133	724	17	GTCGCTACTACCGATTGAATCATTTGGTGAGGTCCGCGGACTGTTGTGCTTCCTTCCTCGTGTTGGTTGCGCTTCTTGGGAAGCGGCACGAACCTGATGATTTAGAGGAAGTAAAAGTCGTAACAAGGTTTCC
528	5c9726ec62f0ab60f8be439fe3dbeb11	OTU_528	116	724	7	GTCGTTGTTTCCGATGATGGTGCAATACAGGTGATCGGACAGACGAACCCCTGGTTTGTCTGAAAGTTCACCGATATTTCTTCAATAGAGGAAGTAAAAGTCGTAACAAGGTAGCT
529	95d27966899c19c82ed4da094dc17843	OTU_529	132	723	15	GTCGCTACTACCGATTGAATGGCTCAGTGAGGCCTCCGGACTGGCTCGGAGAGGTTGGCAACGACCACTCCGAGCCGGAAAGCTCGTCAAACTCGGTCATTTAGAGGAAGTAAAAGTCGTAACAAGGTTTCC
530	a09693d5064e72cb65f2d9434b2abddb	OTU_530	106	723	4	GTCACACCATGGGAGTTGGTTTTACCTTAAGCCGGTGAGTTAACCTTCGGGAGACAGCCGACCACGGTAAGGTCAGCGACTGGGGTGAAGTCGTAACAAGGTAGCC
531	25b39660a107358bf89fbf3e8691d3f7	OTU_531	131	723	9	CGTCGCTACTACCGATTGAACGTTTTAGTGAGGTCCTCGGATTGTGATTCAGCTGGTTCACGCTGACTGTTTTGCGAGAAGACGACCAAACTGAAGCGTTTAGAGGAAGTAAAAGTCGTAACAAGGTTTCC
532	7e51f2340d0ba6d8057382c756206a6f	OTU_532	114	722	1	GTCGCTCCATCTGATTGGGTGTGCAGGTGAAACTGGTCTTATATGTAAACATTTCGTTTAAAGAGCAAGTGAACAGGCCCACTAAGAAGAAGGAGAAGGCGTAACAAGGTTTCC
533	839b7d8666745cba72a3c6554deaf34b	OTU_533	136	722	13	GTCGCTACTACCGATTGAATGGTTTAGTGAGACCCTCGGATTCGTCCCAGCAGGGTGGGTTTCTACCTTATTGGTGTGCGGAGAAGACGGTCGAACTTGATCATTTAGAGGAAGTAAAAGTCGTAACAAGGTTTCC
534	5bcd04e36d379f29f90eebbdb6ff422a	OTU_534	131	721	13	CCGTCGCAGCTACCGATTGAATGTCTCGGTGAAGACTTGGGACCGTGGTGCTATCGCTTAATTGTGGTGCATCGTGGGAACTGGTTTAAACCTCGTTATTTAGAGGAAGCTAAAGTCGTAACAAGGTTTCC
535	ed1b2f4787fb0cb2367ef13e093f9198	OTU_535	128	721	16	GTCGCTCCTACCGATTGAGTGATCCGGTGAATAATTCGGACAACAGGTCGAGCAGTTTCTGTTCTTCTCTGCTGGAAGTTTAGTGAACCTTATCACTTAGAGGAAGGAGAAGTCGTAACAAGGTTTCC
536	a11b83c6796ec23313b55e6453bb6e4b	OTU_536	131	721	5	CGTCGCACCTACCGATTGAATGGTCCGGTGAAGCCTCGAGATTGTGGTTAGTTTCCTTTATTGGAAGTTAGCCGCGAGAACTTGTCTAAACCTTATCATTTAGAGGAAGGTGAAGTCGTAACAAGGTTTCC
537	f9a007449cc798b43105cb372b2b2a6f	OTU_537	132	721	3	GTCGCTCTTACCGATGGACTTCTCTGTGAGTTTGAGGGACTGGCTTCATGTTGTGGACTTGTCTGCTTCTAGCTATGGAAACTTAAACGAACAGTGTGGTCTAAAGGAAAGAGAAGTCGTAACAAGGCATCG
538	8172987f3965ed319a01369cd6e3a94f	OTU_538	106	716	10	GTCACATCACGAAAGCCAGGTGTACTAGAAGTCGCTGGTCCAACCTTCGGGAGGAAGGCGCCGACGGTGTGCTTGGTGATTGGGGTGAAGTCGTAACAAGGTAGCT
539	a746d101e707628e4867c322b65e3f96	OTU_539	132	716	14	GTCGCTACTACCGATTGAATTGGTAAGTGAAGACTCGGGAGTTGGTTCAAGCCGAGCGCAAGCGAGGCTAGAACTGGCAAACTTGTTTAAACTTGTCTGTTTAGAGGAAGTAAAAGTCGTAACAAGGTATCC
540	abb1db335fab5c5a238c805c7c332e06	OTU_540	132	716	1	GTCGCACCTACCGATTGAATGGTCCGGTGAAGTTTTCGGACCGTCGCAATGTCACCTTTACCGGAGACGCTGTGATGGGAAGTCACCTAAACCTTACCATTTAGAGGAAGGTGAAGTCGTAACAAGGTTTCC
541	d02f85a0e377e8225d827aad7e03906e	OTU_541	131	713	12	GTCGTTACTACCGATTGAATAATCCGGTGAAATCTTCGGACCGAAGGCTCATGCGAGGCAACTTGCTAAGCTTTCGGGAAGTTGAGTAAACCTTATTATTTAGAGGAAGTACAAGTCGTAACAAGGTTTCC
542	1aa43fd090eb330597f9f23d120e5ddb	OTU_542	106	711	12	GTCACATCACGAAAGCCGGGTGTACTAGAAGTCGCTGACCCAACCTTCGGGAGGGAGGCGCCGACGGTGTGCTCGGTGATTGGGGTGAAGTCGTAACAAGGTAGCT
543	b71e04c0968f2cc8e6dce619953a8831	OTU_543	136	711	5	GTCGCTACTACCGATTGAATGGTTTAGTGAGATCTTCGGATTGGTGCCAGCGAGTCCAGCAATGGACACGGTGGATATCGAGAAGTTGATCAAACTTGATCATTTAGAGGAAGTAAAAGTCGTAACAAGGTTTCCG
544	9dd94e233e962dfa2d0374ecd11db0d7	OTU_544	132	709	1	GTCGCTCCTACCGATTGAGTGATCCGGTGAGTAATTCGGACTGCAGCGTAGTTCGGTTCCCGAAAGAAAACGCTGTGGAAAGCTTAGCAAACCTTATCACTTAGAGGAAGGAGAAGTCGTAACAAGGTTTCC
545	bc20be18be1e75734896e83b30c7d9cf	OTU_545	131	705	7	CCGTCGCTCCTACCGATTGAGTGATCCGGTGAATAATTCGGACTGCAGCAGTGTTCGGTTCCTGAGCGTTGCAGTGGAAAGTCTAGTGAACCTTATCACTTAGAGGAAGGAGAAGTCGTAACAAGGTTTCC
546	fa02c441368cb40b9e2d593ee821d2c9	OTU_546	107	704	14	GTCACACCATGGGAGTTGGCTTTACCCGAAGGCGGTGCGCCAACCTTTTAGGAGGCAGCCGACCACGGTAAGGTCAGCGACTGGGGTGAAGTCGTAACAAGGTAGCC
547	26ccd5fdadcb7bf52e4375a4c2f169af	OTU_547	136	704	6	GTCGCTACTACCGATTGAACGGTTTAGTGAGATCCTCGGATTGGTCCCGGCGCAGCGGGCGACCGCCGCGCCGGTGTGCCGAGAAGACGATCAAACTTGATCGTTTAGAGGAAGTAAAAGTCGTAACAAGGTTTCC
548	8cb7dd0b7b2a149ee98739cf6cf24d5e	OTU_548	128	704	2	GTCGCACCTACCGATTGAATGGTCCGGTGAAATCTTCGGATCGCGGCTTGACCCTTTGTTGGGACGAACTGCCAAAAGTTGATTAAACCTTGCCATTTAGAGGAAGGTGAAGTCGTAACAAGGTTTCC
549	bb8a7ab16788270baa81429afb8d4671	OTU_549	131	703	2	CGTCGCTACTACCGATTGAACGTTTTAGTGAGGTATTTGGATCGGCGCTCTGGAGATTCACGTCTCTATTGTGCTGAAAAGACTCCCAAACTTGAGCGTTTAGAGGAAGTAAAAGTCGTAACAAGGTTTCC
550	864ffa0b98f03a6e2c75a1f7a1ecb9f3	OTU_550	131	700	5	CCGTCGCTCCTACCGATTGAGTGATCCGGTGAATACCTCGGACTGCTAGCACCGTCTGTTTCAGTTGGTGCCCGCGGGAAGTTGCGTGAACCTTATCACTTAGAGGAAGGAGAAGTCGTAACAAGGTTTCC
551	ee1af23a4cd4b0c82b11d288b80c12df	OTU_551	126	697	4	GTCGCTACTACCGATTGAATGGTTTAGTGAGATCATCGGATCGGCCGTGTCGGTTAGCCGTTCACGTGCCGAAAAGACGCTCAAACTTGATCATTTAGAGGAAGTAAAAGTCGTAACAAGGTTTCC
552	d88431af5a1eac2c88bcbaa57e8fa9ca	OTU_552	131	697	4	GTCGCTACTACTGATTGGGTGTTCAAGTGAGATGCTCAGACCCTTGTTTGCGTGGTTCAATATTGTGCTTATTGAGGAAAAAGTTTCAAGCTTGAGTGTCTAGAGGAAGTAAAAGTCGTAACAAGGTTTCC
553	8171027641573b02e8b3c9d3ec0c47c8	OTU_553	131	697	14	CGTCGCTCCTACCGATTGAGTGATCCGGTGAATAATTCGGACCGCAGCAGTGTTTTGGTTCCTGAGCGCTGCAGTGGAAAGTTTAGTGAACCTTATCACTTAGAGGAAGGAGAAGTCGTAACAAGGTTTCC
554	a93e81e6c54c4c082bbee8982c754e81	OTU_554	107	696	1	GTCACACCATGGGAGTTGGATTCACCCGAAGGCGGTGCGCTAACCTTTTAGGAGGCAGCCGACCACGGTGGGTTCAGCGACTGGGGTGAAGTCGTAACAAGGTAGCC
555	532cf79f7d43819a10619f5b651d5d68	OTU_555	138	696	16	GTCGCTACTACCGATTGAACGGTTTAGTGAGGGCATCGGATTGGTCTCGGCCCGCCCTTTCACCGGGCAGCGGCCGTTGGTCGAGAAGACGCTCGAACTTGATCGTTTAGAGGAAGTAAAAGTCGTAACAAGGTTTCC
556	d87e1c02e01657ef25513948f0755e14	OTU_556	116	695	2	GTCGCTCCTACCGATCGAGTGATGAGGTAAGTTGTCCTGACTTGCATTAATACAAATACAAGAATGTACATCGAACCTTTTTTCTTAGAGGAAGGAGAAGTCGTAACAAGGTTTCC
557	cbfe2622ad703cdb99554309a6e775b6	OTU_557	136	695	9	GTCGCTACTACCGATTGAATGGCTTAGTGAAGTCTCCGGATTCGCGCTGCCGTGAGCGGCAACGCTCGTGGTGGATGCGGAGAAGCTGATTGAACTGTGTCATTTAGAGGAAGTAAAAGTCGTAACAAGGTTTCCG
558	d7c2f70adcb767449fdd79c0e1e66bad	OTU_558	136	694	8	GTCGCTCCTACCGATTGAAGTTTTCGGTGAGTTGACAGGAGGATTTTTTTGAAACTGGTTCGCCAGTGGATTTTAGATCCAAATGCCAACGAATCGATGGCTTTAGAGGAAGGAGAAGTCGTAACAAGGTTTCCGT
559	30e6332e27b50d361dc68d92c1ca97ec	OTU_559	132	692	4	GTCGCTACTACCGATTGAATGGCTCAGTGAGGCCTTCGGACTGGCCCAGGGAGGTCGGCAACGACCACCCAGGGCCGGAAAGTTGGTCAAACTCGGTCATTTAGAGGAAGTAAAAGTCGTAACAAGGTCTCC
560	46813096eafce60c9ae52f1e765634d4	OTU_560	136	692	4	GTCGCTACTACCGATTGAATGGTTTAGTGAGATCTTCGGATTGGTGCCGGAGTTGTGGGCAACCATGGCTGCGGATACCGAGAAGACGATCGAACTTGATCATTTAGAGGAAGTAAAAGTCGTAACAAGGTTTCCG
561	dd754b20ce1a517571f4c606ff869486	OTU_561	137	688	2	GTCGCTACTACCGATTGAATGGTTTAGTGAGATCCTTGGATTGGTCCCTGCGCGGCAGGCAACTGCCGGGCCGGTGATGCCGAGAAGACGATCAAACTTGACTATTTAGAGGAAGTAAAAGTCGTAACAAGGTTTCC
562	f0facc759b1815c9a8f55def361932f0	OTU_562	136	686	8	GTCGCTCCTACCGATTGAAGTTTTCGGTGAATTTGCTGGAGGTTCGCTTTGAAACTGGTTCGCCAGCGGATTTGTTTACCAAAAGCAAATGAATCGATGGCTTTAGAGGAAGGAGAAGTCGTAACAAGGTTTCCGT
563	ad55abb18968ebd07a4ad5ae7d47788c	OTU_563	133	682	9	GTCGCTCCTACCGATTGAATGATCCGGTGAGTTTTTTGGACTGTGGCAACGGTTTCGGTTCGCCGTACTGATGCCGCGGGAAGATACGCAAACCTTATCATTTAGAGGAAGGAGAAGTCGTAACAAGGTTTCC
564	34d7b239f5bd48c5e60a44b9253538af	OTU_564	131	677	1	GTCGCTACTACCGATTGAATGGCTTAGTGAGGCCTCGAATTGGCGTCGAAGAGCCGGCAACGGCACTTTGGTGCTGAGAAGTTGGTCAAACTTGGTCATTTAGAGGAAGTAAAAGTCGTAACAAGGTTTCC
565	2d6aa446c65d1d2bf30430247770ae91	OTU_565	127	677	17	GTCGCTCCTACCGATTGAGCAATCCGGTGAATAATTTGGATTCGCTGCATCTGGTCAACAGTGTGCGTGCGGAAAAATTTTGTAAACCTTATTGTTTAGAGGAAGGAAAAGTCGTAACAAGGTTTCC
566	24e039ceed3aebcd30baaa94e7d273a6	OTU_566	137	675	2	GTCGCTACTACCGATTGAATGGTTTAGTGAGATCCTTGGATTGGTCCCGGCGCGGCAGGCGACTGCCGGGCCGGTGCAGCCGAGAAGACGATCAAACTTGACTATTTAGAGGAAGTAAAAGTCGTAACAAGGTTTCC
567	da50da58eb178fcfaab6816b4193bfe6	OTU_567	108	674	11	GTCACATCACGAAAGCTGGCTGTACTAGAAGTCGCCGAGCTAACCCGCAAGGGAGGCAAGCGCCTAAGGTATGGTTGGTGATTGGGGTGAAGTCGTAACAAGGTAGCT
568	4bf57ff2b67c4e55b8da185eff2c657b	OTU_568	100	674	13	GTCACACCATGGGAGTTGATTTCATTCGAAGCGGGGATGCTAAGATAGCTACCTTCCACAGTGGAATTAGCGACTGGGGTGAAGTCGTAACAAGGTAACC
569	f9fe853e51aaab012095bf04f62b3186	OTU_569	131	671	1	CCGTCGCTCCTTCCGATTGAGTGATCTGGTGAATAATTCGGACCGCGGCAGTGTTTGGATCCCAAGCGTTGCCATGGAAAGTTTAGTGAACCTTATCACTTAGAGGAAGGAGAAGTCGTAACAGGGTTTCC
570	0a6197214ca9d8d51b74ba1c966ba31b	OTU_570	131	671	5	GTCGCTACTACCGATTGAACGTTTTAGTGAGGTATTTGGACTGAGCGCTTGGAGACTTCTAGTCGCCTTGAACTCGGAAAGACTCCCAAACTTGAGCGTTTAGAGGAAGTAAAAGTCGTAACAAGGTTTCC
571	d00ae90b4143c4c03981436ce3736227	OTU_571	131	670	7	CGTCGCACCTACCGATTGAATGGTCCGGTGAAGCCTCGGGATTGTGATGAGTTTCCTTCATTGGGAGTTTGTCGCGAGAACTTGTCTAAACCTTATCATTTAGAGGAAGGTGAAGTCGTAACAAGGTTTCC
572	7098f446d4f5b2892f3a464b1c563298	OTU_572	106	668	15	GTCACACCATGGGAGTTGGCTTTACCCGAAGCCGGTGCGCTAACCGCAAGGAAGCAGCCGACCACGGTAAGGTCAGCGACTGGGGTGAAGTCGTAACAAGGTAGCC
573	2d4c76ae4cc97ad763e4d68b71e07d63	OTU_573	131	666	12	CGTCGCATCTACCGATTGAATGGTCCGGTGAAGCCTCGGGATTGTGGCTAGTTCCCTTCATTGGGAGTTTGTCGCGAGAACTTGTCTAAACCTTATCATTTAGAGGAAGGTGAAGTCGTAACAAGGTTTCT
574	df05fad662bfae186b0ac26aee6d0205	OTU_574	131	666	1	CGTCGCTCCTACCGATTGAGTGATCCGGTGAATAATTCGGACTGAAGCTTTACTTGGTTCGCCGAGTTTTGCTTTGGAAAGTCTAGTGAACCTTATCACTTAGAGGAAGGAGAAGTCGTAACAAGGTTTCC
575	963dd589c1e576b21fcf7d71cd1ece6e	OTU_575	133	664	12	GTCGCTACTACCGATTGAACGGTTTAATGAGTTCCGAGGATTTGGGATCTCAGGTTCCCTGTGGATCTGAGTTTCTGGAGAGCAGGTGCAAATTTGATCGTTTAGAGGAAGTAAAAGTCGTAACAAGGTTTCC
576	896d2960797e3ba4da7b7a146ca20f54	OTU_576	132	663	4	GTCGCTACTACCGATTGAACGTTTTAGTGAGGTACTTGGACTGGACCTCTGGAGATTCACGTCTCTAGTGCTGTTCGGGAAGATTCCCAAACTTGAGCGTTTAGAGGAAGTAAAAGTCGTAACAAGGTTTCC
577	4b99f0b73f42c11f1bdf3f4eef59e56b	OTU_577	106	662	5	GTCACACCACGAAAGTCGGTTGTTCCAGAAGTAGTTGAGCTAACCTTCGGGAGGCAGGCTACCAAGGAATGGCTGGTAATTGGGGTGAAGTCGTAACAAGGTATCC
578	dea3a55fb127aa585359239e8bbe4627	OTU_578	125	662	1	GTCGCTCCTACCGATTGAGTGATCCGGTGAACACTTCGGATGACGTTTTTCCTTTGCTGGAAATATCGTCAGAAGTCTTGTAAACCTTATCACTTAGAGGAAGGAGAAGTCGTAACAAGGTTTCC
579	bed46273f58938e596be6ad8e9508498	OTU_579	131	659	4	CGTCGCACCTACCGATTGAATGGTCCGATGAAGCCTTGGGAGCCTGAATTTGTGCCTTTACTGGTATTTTTTTAGGTGAACTTGTCTAAATCTTATCATTTAGAGGAAGGTGAAGTCGTAACAAGGTTTCC
580	71a29403d95c0dea76232774df6c080b	OTU_580	138	659	5	GTCGCTACTACCGATTGAATGGTTTAGTGAGATCCTCGGACCGGCCCCGGCACGGAGGGGAAACCCTCTAGCCGTGGCTGCCGGGAAGACGATCGAACTTGATCATTTAGAGGAAGTAAAAGTCGTAACAAGGTTTCC
581	ac348093582dab652df753f69b79bce3	OTU_581	136	659	1	GTCGCTACTACCGATTGGATGGTTTAGTGAGGTCCTCGGATCGGCCCCGCCGGGGTCGGTCACGGCCCTGGCGGAGCGCCGAGAAGACGATCAAACTTGACTATCTAGAGGAAGTAAAAGACGTAACAAGGTTTCC
582	dab0513e47a618142541d94ec51b3aad	OTU_582	128	658	1	GTCGCTCCTACCGATTGGGCGAATCGATGAGTCCTTTGGAGGTTCTTAGGAAGGTTTCGGCTGGACTTTGGGCCAAAATTGTGCAAATCTGTTCATCTAGAGGAAGTAGAAGTCGTAACAAGGTTTCC
583	808255e8c86aa027a8cf796aadb08278	OTU_583	131	658	2	GTCGCTACTACCGATTGAACGTTTTAGTGAGGTATTTGGATTGGACTCTTGGAGGTTTGCGCCTCTATTATGTTCGAGAAGACTCCCAAACTTGAGCGTTTAGAGGAAGTAAAAGTCGTAACAAGGTTTCC
584	b68e59735b5c37c8f548599a3e7ec667	OTU_584	128	658	18	GTCGCTCCTACCGATTGGATGATCCGGTGAGTTATTCGGACCGTTTAGTCTTCAGTTCTCTGAGTTCTTAATGGAAAGTCTTGCGAACCTTATCATCTAGAGGAAGGAGAAGTCGTAACAAGGTTTCC
585	48524324aa0629eae0568f1a40250f10	OTU_585	131	657	1	CGTCGCTACTACCGATTGGACGTTTTAGTGAGGTATTTGGACTGGAGCAGGGTCGACTCACGTCAATCCTGTTTCGGGAAGACTCCCAAACTTGAGCGTTTAGAGGAAGTAAAAGTCGTAACAAGGTTTCC
586	0a2c9d4e07a012f9328939275c7f6137	OTU_586	115	656	4	GTCGCTCCTACCGATTGAGTGATCCGGTGAATTTTCTGGACTTCTGGTTCATGCCAAGGAGGAAGTTAAGTAAACCTTATCACTTAGAGGAAGGAGAAGTCGTAACAAGGTTTCC
587	b8a77c6ed1011b28720e0ad6dc718ab5	OTU_587	131	655	10	CGTCGCACCTACCGATTGAATGATCCGGTGAGGCCTCGGGATTGTGGCCCCTGCTATTAAGTTAGTGTGGGCCGCGAGAACTTGTCCAAACCTTATCATTTAGAGGAAGGTGAAGTCGTAACAAGGTTTCC
588	2d617d1708f00a33a8b5dbf62ee9dbf3	OTU_588	131	653	4	CCGTCGCTCCTACCGATTGAGTGATCCGGTGAATAATTCGGACTGCAGCAATGTTCAGCTTCTGAATGTTGCAGTGGAAAGTTTAGTGAACCTTATCACTTAGAGGAAGGAGAAGTCGTAACAAGGTTTCC
589	7d62eb7f2bf3db0d2d2bbae386a6cd4b	OTU_589	108	652	19	GTCAAGCCACGAAAGTGGGGGGCACCCGAAGTCGCCGAGCTAACTCGCAAGAGAGGCAAGCGCCGAAGGTGACCTCCGCGATTGGGACTAAGTCGTAACAAGGTAGCC
590	68784014279d500fa3bf942844b83ebc	OTU_590	128	651	11	GTCGACTCTACCGATTGAATGGTTCGGTGAAAACTTTGGACTGTGGCATTGTCCTTCATTGGACTCCGCCGTAGGAAATTGTTTAAACCTCATCATTTAGAGGAAGAATAAGTCGTAACAAGGTTTCC
591	babb8e6dd90317c735d9231c32a3e985	OTU_591	131	650	1	GTCGCTACTACCGATTGAATGGTTTAGTGAGCTCTCTGGACTGTGGTGTCTTGTTGGAAACTTCGGGATGCATACGGGAAGGAGATCAAACTTGATCATTTAGAGGAAGTAAAAGTCGTAACAAGGTTTCC
592	3c98b5086616a529b91a561a646c7c0a	OTU_592	128	650	4	GTCGCTCCTACCGATTGAGTGATCCGGTGAATTATTCGGACCGCCTTTAGGGTCATTCGTGACCTTTGAGGTGGAAAGTCTTGTGAACCTTATCACTTAGAGGAAGGAGAAGTCGTAACAAGGTTTCC
593	431cccda114f6f0389f091e1a7b7b997	OTU_593	101	649	10	GTCACACCATGGGAGTGGGTTGCACCAGAAGTAGCTAGCTTAACATTGGGCGGTTACCACGGTGTGATTCATGACTGGGGTGAAGTCGTAACAAGGTAGCC
594	3340b0ed44becd19407a4934a90e2926	OTU_594	131	649	9	CCGTCGCTCCTACCGATTGAGTGATCCGGTGAATAATTCGGACTGCGGCATTGTTCAGTTTCTGAACGTTGTCGTGGAAAGTTTAGTGAACCTTATCACTTAGAGGAAGGAGAAGTCGTAACAAGGTTTCC
595	b23e5326f5a186bebc5b8f2162084452	OTU_595	131	646	9	GTCGCACCTACCGATTGAATGGTCCGGTGAAACTTTCGGACGCTTGCAATGTCGCCTTAACGGGGACGCTGCGAGGGGAAGTTAGTTAAACCTTACCATTTAGAGGAAGGTAAAGTCGTAACAAGGTTTCC
596	25eae04c09dbb701d350e55d3f4b6c76	OTU_596	132	646	1	GTCGCTACTACCGATCGAATGGTTTAGTGAGACATCGAGATCCGCTTCTGGCACTGGGCAACTAGAGCCTAAAGCAGAGAACTTTTTCAAACTTGATCATTTAGAGGAAGTAAAAGTCGTAACAAGGTTTCC
597	2af4b562bb3d0254d5c746e746d2e249	OTU_597	131	645	2	CCGTCGCTCCTACCGATTGAGTGATCCGGTGAATAATTTGGACTGCAGCAATACTTGGATCCCGAATGTTGCAGCGGAAAGTTTAGTGAACCTTATCACTTAGAGGAAGGAGAAGTCGTAACAAGGTTTCC
598	34dbd5f5bae2b78f3dd563a8dcc11b24	OTU_598	131	645	1	GTCGCTACTACCGATTGAATGGCTTAGTGAGCCTTTGGGACTGGCAGCCAACGCCGGCAACGGCAGCTGGCCGCTGGAAACTTATGCAAACTTGGTCATTTAGAGGAAGTAAAAGTCGTAACAAGGTTTCT
599	85da5389b2d9152ac3dfd90f3cbcb092	OTU_599	101	644	5	GTCGTTTCTTCCGACTGGTACTCATTGTGAATTGTGAGGAAAGTATAAAATTGCTGTGAATGCTGAGTACTGGAGGAAGAAAAAGTCGTAACAAGGTTATC
600	08a1ccd1c0781806842af37e5277fd85	OTU_600	131	643	2	CCGTCGCTTCTACCGATTGAGTGATCCGGTGAATAATTCGGACTGCTGTTTTCTCTGGTTCGCCAGAATTACGGCGGAAAGTTTCGTGAACCTTATCACTTAGAGGAAGAAGAAGTCGTAACAAGGTTTCC
601	978354eb646747ae332b91602799d174	OTU_601	133	637	3	GTCGCTCCTACCGATGGAACGATCCGGTGAAAACTCTGGATTGGAGGGTTGGTTGTTGCTTTGCAACACTACCCTTCGAGAAATTGTTTGAATCTTATCGTTTAGAGGAAGGAGAAGTCGTAACAAGGTTTCC
602	5651f66cd835ebc4e865b9f6fa437f72	OTU_602	131	635	13	CCGTCGCTCCTACCGATTGGATGATCCGGTGAATAATTCGGACTGCGGATTTGCTGAGTTTCTTAGCTTATCTGCGGGAAGTTTAGTGAACCTTATCATCTAGAGGAAGGAGAAGTCGTAACAAGGTTTCC
603	d180c47898a74428c49a963569da1209	OTU_603	133	633	4	GTCGCTACTACCGATTGAATGGTTTAGCGAGAACCTCGGATCGAGCCCATTCCGTGCGAAAGCATGGTAGCGGGTTTGAAAAGAAGCTCAAGCTTGATCATTTAGAGGAAGTAAAAGTCGTAACAAGGTTTTC
604	1a4cd1e9355816f66e14402939155e46	OTU_604	137	632	7	GTCGCTACTACCGATTGATTGGTTTTGTGAGGGCTTCGGACTGCGGCCAGAAGCAGGCGGCAACGTCCGCTCTGGCACTGCGGGAAGTAGCTCGAACTGAATTCGTCAGAGGAAGTAAAAGTCGTAACAAGGTTTCC
605	97f701d88be05151e37873cd5255fc38	OTU_605	121	627	9	GTCGCTCCTACCGATTTCGAGTGGTCCGGTGAACCCTTTGGACCGGCGACGCCTCGTGCGCCGCTGGAAAGTCGAGTAAACCACATCACTTAGAGGAAGGAAAAGTCGTAACAAGGTTTCC
606	054cbb6c05bd74589cc9631d902ddce9	OTU_606	131	626	8	CCGTCGCTCCTACCGATTGAGTGATCCGGTGAATAATTCGGACTGCAGCATTGTTCAGTTCCTGAACGTTGTCGCGGAAAGTCTAGTGAACCTTATCACTTAGAGGAAGGAGAAGTCGTAACAAGGTTTCC
607	a8bc8ac5eea5d5a0cad157ae47d87d47	OTU_607	136	625	1	GTCGCTACTACCGATTGAATGGTTTAGTGAGAATTTTGGACTGGAGCTCTCTTGTTCAGCAATGAACGAGAGAGAGTCCGGGAAGTCATTCTAACTGTATCATTTAGAGGAAGTAAAAGTCGTAACAAGGTTTCCG
608	6cfb7b2a4d53a270f0089fdcd5f5fd52	OTU_608	131	625	13	CGTCGCACCTACCGATTGAATGGTCCGGTGAAATTCTCGGACGACACTTGGGAATGTTTACTCGGACCCGAGTGTTGGAAGTTAATTAAACCTTACCATTTAGAGGAAGGTGAAGTCGTAACAAGGTTTCC
609	31fbd39f762958d1f72f956e78a2dd6c	OTU_609	132	620	2	GTCGCTACTACCGATTGAATGGCTTAGTGAGGTCTCCGGATTGACTTCGAGGAACCGGCAACGGTACTTTGTTGTTGAGAAGCTGACCAAACTTGGTCATTTAGAGGAAGTAAAAGTCGTAACAAGGTTTCC
610	51bcc3ced9d3f1cfa2d8171a9d6c28ca	OTU_610	131	619	4	CGTCGCACCTACCGATTGAATGGTCCGGTGAGGACTCGGGATTGTGGCTTGGTTCCTTCATTGGGACTTGGCCGCGAAAACTTGTCCAAACCTTATCATTTAGAGGAAGGTGAAGTCGTAACAAGGTTTCC
611	778fed140bed0452193e83f12ee46ced	OTU_611	133	618	3	GTCGCACCTACCGATTGAATGCTCCCGTGAGGCCTTCGGACTGTGGCTGATGTCTCCTTCATTGGAGACGTAGCTGTGGAAAGTTGTCCAAACGTTAGCATTTAGAGGAAGGTGAAGTCGTAACAAGGTTTCC
612	e21b13cd07b63673de140dedbd8735da	OTU_612	136	618	19	GTCGCTACTACCGATTGAATGGTTTAGTGAGATCCTCGGATTGGACTCGTCGGGGGAGGCAACTCTCCTGACGTTGTTCCGAGAAGACGATCAAACTTGATCATTTAGAGGAAGTAAAAGTCGTAACAAGGTTTCC
613	f86c4ffbe1241020f4274e7feb8f4b4e	OTU_613	131	615	6	CGTCGCACCTACCGATTGAATGGTCCGGTGAAGCCTCGGGATTGTGGCCAGTTTCCTTTATTGGGAGTTGGCTGTGAGAACTTGTCTAAACCTTATCATTTAGAGGAAGGTGAAGTCGTAACAAGGTTTCC
614	5b834f21ad8a1af0a25bbe89445431b3	OTU_614	131	613	14	CGTCGCACCTACCGATTGAATGGTTCGGTGAAGATCTCGGACTTCGATATTTATTCTTTATTGAGTTTATATTGTGGGAAGTTATCTAAACCTCATCATTTAGAGGAAGGTGAAGTCGTAACAAGGTTTCC
615	8b90759da3f7640e17d789f1ba1d39ee	OTU_615	108	612	8	GTCACACCACGAAAGTCGGCTGTACCAGAAGTTGCTGGGCTAACCCTTCGGGGATGCAGGTACCTAAGGTACGGTCGGTAATTGGGGTGAAGTCGTAACAAGGTAGCC
616	c2d30eb2014ebed012998def32f28faa	OTU_616	128	611	11	GTCGCTCCTACCGATTGAGTGATCCGGTGAATAATTCGGACTGCAGAGGAATCGAGTTTCGGTTCCATTTGGAGGAAGTTTAGTGAACCTTATCACTTAGAGGAAGGAGAAGTCGTAACAAGGTTTCC
617	0ae2e6ff64fd166e878d77f30cc32ff2	OTU_617	127	611	13	GTCGCTCCTACCGATTGAATGATCCGGTGAATACTTGGGACCGTGTCGCGATCAGTTTCTGGTTGCGATGTGGGAACTTGAGTGAACCTTATCATTTAGAGGAAGGAGAAGTCGTAACAAGGTTTCC
618	2622dbf474dbe6430d0769555311160b	OTU_618	132	611	4	GTCGCACCTACCGATTGAATGATTCGGTGAAAATTTCGGACCGTGTCGCTGCCCCATTAGGTTGGAGCGGTGACTTGGGAAGTTATTTAAACCTCATCATTTAGAGGAAGGTGAAGTCGTAACAAGGTTTCC
619	d692de5c0adedcd572a682eade41c59e	OTU_619	131	611	2	CGTCGCACCTACCGATTGAATGGTCCGGTGAAGCCTCGGGATTGTGCCTAGTTCCCTTTATTGGGAGTTTGTCGCGAGAACTTGTCTAAACCTTATCATTTAGAGGAAGGTGAAGTCGTAACAAGGTTTCC
620	219519f60a3e658d986de6e45782b8da	OTU_620	136	610	5	GTCGCTACTACCGATTGAATGGTTCAGTGAGATAATCGGACAAGTAACTTGGCAACTGGCAACAGTTGACGTGCATATTTGGAAGACGATCAAACTTGGTCATTTAGAGGAAGTAAAAGTCGTAACAAGGTTTCCG
621	dbb4da4e5e1378c90f852ce8fa15e07d	OTU_621	132	607	1	GTCGCTCCTACCGATTGAATGGTCCGGTGAAGCGTTCGGACTATGACTCTCTGACGGTTCGCCGTCTAAGTGTCGTGGGAAGTTCGTTGAACCTTATCATTTAGAGTAAGGAGAAGTCGTAACAAGGTTTCC
622	e86cbcd25df83bc6ed0f8ab816370504	OTU_622	156	606	1	GTCGCTACTATCGATTGAACGGTTAAGTAAGGTACTCGGAACGGCCGCGGTTCTCTCTGTGCTCTGCTCTCGGGTACGACACAGGGTAATGTCGTCGGCCGGAAAGAAGCCCAAACTTGATCGTTTGGAGAAAGTAAAAGTCGTAACAAGGTTTCC
623	021202e85c97b1de24bf0e35e4abfd74	OTU_623	136	604	1	GTCGCTACTACCGATTGAATGGTTTAGTGAGATCCTCGGATTGGACTCGTTGGGGAGGGCAACCTACCTGACGTAGTTCCGAGAAGACGATCAAACTTGATCATTTAGAGGAAGTAAAAGTCGTAACAAGGTTTCC
624	b205ac8083816585d2360662d0dcfcb9	OTU_624	131	603	1	GTCGCTACTACCGATTGAACGTTTTAGTGAGGCATTTGGATCGGATCTCTGGCGCTTCGCGGCGCGAGTGTTTCTGAGAAGATTTCCAAACTTGAGCGTTTAGAGGAAGTAAAAGTCGTAACAAGGTTTCC
625	77c8b6f3ab9762241f7e56296bb6d403	OTU_625	136	602	6	GTCGCTACTACCGATTGGATGGTTTAGTGAGAACTTCGGATTGGGTCCGGCGCGGTCCGCAAGGTTCGCGGCGGACATCGAGAAGTCGTTCGAACCAAATTTTCTAGAGGAAGTAAAAGTCGTAACAAGGTTTCCG
626	e66a53e151f23c3b2755d58a18a61179	OTU_626	107	600	1	GTCGCTGTTACCGATTGAGTGTTAAGGTGAACCTTCTTGATAGTGTCAAACTAAATATTAAGTAAACCTTTGCACTTAGAGGAAACAAAAGTCGTAACAAGGTTTCC
627	7b3753d8605c1cb4605c3bc21ccacfe4	OTU_627	131	599	10	GTCGCTCCTACCGATTGAATGGTCCGGTGAAATCTTCGGATTGCTGGATAGGACTTCGCAAGTTGACCTATCTGCGAGAAGTTGCTTGAACCTTATCATTTAGAGGAAGGAGAAGTCGTAACAAGGTTTCC
628	bb7da28aae371c256885d5770f86244a	OTU_628	139	598	3	GTCGCTACTACCGATTGAGTGGTTTAGTGAGGCTCACGGACTGCCCGCGGCACACGGCGCCTTCGGGTGTCGCGTCGCGGCGCGGAAAGTGAGACGAACTTGATCACTTCTAGGAAGTAAAAGTCGTAACAAGGTTTTC
629	4d340e805bdaa014df10130f6a5a8e24	OTU_629	106	597	1	GTCACACCATGGAAGTGTGTTGCACCAGAAGTAGGTAGTCTAACCTTCGGGAAGGCGCTTACCTCGGTGTGATCCATGACTGGGGTGAAGTCGTAACAAGGTAGCC
630	18a8c962daf8b34931f67360e323ae7b	OTU_630	132	597	1	GTCGCTACTACCGATTGAATGGCTTAGTGAGGTCTTCGGATTGGCTTTGGGGAGCCGGCGACGGCGCCTTATTGCTGAGAAGTTGATCAGACTTGGTCATTTAGAGGAAGTAAAAGTCGTAACAAGGTTTCC
631	447680e003246db87f2281e784dcb42f	OTU_631	131	596	1	CGTCGCTACTACCGATTGAACGTTTTAGTGAGGTATTTGGACTGGACCAGGGTCGGTTTGCGCCAACCTTGGCTCGGAAAGACTCCCAAACTTGAGCGTTTAGAGGAAGTAAAAGTCGTAACAAGGTTTCC
632	d55c029d8d410f66f019b4cdcdeb1bea	OTU_632	138	595	1	GTCGCTACTACCGATTGAATGGTTTAGTGAGATCCTCGGATTGGACGCGGCGCTTGGGGCAACCCGTGTGCCGTTGTTTGCCGAAAAGAAGATCGAACTTGATCATTTAGAGGAAGTAAAAGTCGTAACGAGGTTTCC
633	e09262fa0bfb59a219261649583c98b5	OTU_633	132	593	8	GTCGCTACTACCGATTGAATGGTTTAGTGAGATCTCGGGATCAGCCGTTAGTTTCGGGCGACTGAAACTCTTGGCAGAGAACTTGCTCAAACTTGATCATTTAGAGGAAGTAAAAGTCGTAACAAGGTTTCC
634	8b012cdb204ae3661dc00941d76c30e8	OTU_634	136	592	13	GTCGCTCCTACCGATTGAATGGTCCGGTGAGGTTCTCGGATCACGATTTCGACACTGGTTCGCTAGTGACGATTTTGAGAGAAGTTACCCAAACCTTACCATTTAGAGGAAGGAGAAGTCGTAACAAGGTTTCCGT
635	04bf9bd36b6ab918086f9b977e43de21	OTU_635	136	592	6	GTCGCTACTACCGATTGAACGGTTTAGTGAGATCCTCGGATTGGTCCCGGCATGGTGGGCAACCGTCGCGCCGGTGTGCCGAGAAGACGATCAAACTTGATCGCTTAGAGGAAGTAAAAGTCGTAACAAGGTTTCC
636	5d2b0c8b046fc8cc304794bbf27e1895	OTU_636	106	589	1	GTCACACCATGGGAGTTTGTTGCACCAGAAGTAGGTAGTCTAACCGTAAGGAGGACGCTTACCACGGTGTGGCCGATGACTGGGGTGAAGTCGTAACAAGGTAGCC
637	63831cbe9f51b1bd0c55e834d54d9eff	OTU_637	131	589	12	CCGTCGCTCCTACCGATTGAGTAATCCGGTGAATAATTCGGACCGATTGCGATGTCAGTTCCTGGCGCCGCAGACGGAAAGTCTAGTGAACCTTATTACTTAGAGGAAGGAGAAGTCGTAACAAGGTTTCC
638	3171c332bad540a9e85c65cbe7e775fc	OTU_638	132	588	9	GTCGCACCTACCGATTGAATGGTCCGGTGAAATCTTCGGACTGAGACATTGATTTGTTCACTCAAAGAGATGTTTTGGGAAGTTGATTAAACCTTACCATTTAGAGGAAGGTGAAGTCGTAACAAGGTTTCC
639	3b57d9de144e1b24f936f403205c70a3	OTU_639	136	588	15	GTCGCTCCTACCGATTGAATGATCCGGTGAGGCCCCCGGACCGTGGCAACGCAGCTGGTTCGCCAGCCGCGATGCTATGGGAAGCTGTCCAAACCTTATCATTTAGAGGAAGGAGAAGTCGTAACAAGGTTTCCGT
640	1fb13f7990da2c3ed9dc097db00d0473	OTU_640	101	588	13	GTCACATCATGGAAGCCGATCGCACCCGAAGTGTCTGCGCCAACATTGGCAGGGCCCTAAGGTGTAGTTGGTAACTGGGATGAAGTCGTAACAAGGTAGCC
641	c23853bd39ba7d2554a895516d4f0618	OTU_641	131	588	2	GTCGCTACTACCGATTGAACGTTTTAGTGAGGTATTTGGATCGGACCTTGGCTGGTTCACGCCTGCCTTGTGTCTGAGAAGACTCCCAAACTTGAGCGTTTAGAGGAAGTAAAAGTCGTAACAAGGTTTCC
642	6eaf5590b6e5ac78ed9d09b748cd6321	OTU_642	131	588	1	GTCGCTACTACCGATTGGGAAAATTTCAGAATGCTTAGGACTGTGACTTGTTTGGCCTTTGGCCTTACTCGCCGCGGAAATAAGTATAATGATATTTTCCTAGAGGAAGTAAAAGTCGTAACAAGGTTTCC
643	1a787fcbcd165d69f30413d92b8231c1	OTU_643	139	588	4	GTCGCTACTACCGATTGAATGGTTTAGTGAGATCCTCGGACTGGAGCCGGGCCGGGCCGGCAACGGTGCGGCTTTTGTGCTTCGGGAAGTTGCTCTAACTGTATCATTTAGAGGAAGTAAAAGTCGTAACAAGGTTTCC
644	58a1eeaa236a5470041a619720e0fbad	OTU_644	131	588	1	CGTCGCTACTACTGATTGGATGGTTAAACAAGTAAAGGTGAAGCTCGCTTGCCCGGCTCTGCCGCGGTGAGTTAGTGGAACTTTAACGAGTTTATTTGTCTAGAGGAAGTAAAAGTCGTAACAAGGTTTCC
645	345875b756df4612f27ef2d3823c684e	OTU_645	137	586	10	GTCGCTACTACCGAATGGATGGTTTAGCGAGAGCCTTGGATCGGAGCCCGGGAGGTCAGCGATGGCCGCCCGGGAGTACCTGAGAAATTGCTCCAGCTTGATCATCTAGAGGAAGTAAAAGTCGTAACAAGGTTTCC
646	93bb32aa13f8682af95f33a09213086d	OTU_646	109	586	13	GTCGCTCTTACCGATGGACTACTCCATGAGTCTGAGGGACTCGTCTCGTTACGGGAAACTTAGGCGAATGGCATGGTCTAGAGGAAAGAGAAGTCGTAACAAGGCATCT
647	d20e69e6aa1c492b63d56e46738a0e94	OTU_647	108	586	11	GTCACATCATGAAAGCCGTCTGCACCCGAAGTCGCTGAGCCAACCCGCAAGGGAGGCAGGTGCCGAAGGTGTGGGTGGTGATTGGGATGAAGTCGTAACAAGGTAGCC
648	752e03696c31f9877aee4712e5aa6dd6	OTU_648	127	586	1	GTCGCTCCTACCGATTGAGTGTTCCGGTGAATACTTAGGACCGTGCCTTGGCTAGATTCTAGTCTCGGCGTGGAAATTTGAGTGAACCTTAACACTTAGAGGAAGGAGAAGTCGTAACAAGGTTTCC
649	7027d09f524146cb2616f3d7aa7df642	OTU_649	105	585	14	GTCAAGCCACGAAAGTTGGGGGGGCCCGAAGTCGCGATGCTAACCTCGTGAGGCTAGCGCCGAAGGTCAACTCGATGATTGGGACTAAGTCGTAACAAGGTAGCC
650	35bbec2d77dfa45f82df01d39a148a90	OTU_650	136	582	1	GTCGCTACTACTGATTGGATGATTAAACAAGAAACGCTGAAGCTCGCTTACTAAGGCTTCGTGCCTTCGGTTTGTTGCGTGGAAGTGTATCGAGTTTATTTGTCTAGAGGAAGTAAAAGTCGTAACAAGGTTTCCG
651	d82cb6ec41de3ac54a1e9ae8e91c553d	OTU_651	136	582	1	GTCGCTACTACCGATTGGATGATTTAGTGAGGGCTTCGGACTGTCTGTGAGTGGAGCACTCGTTGTTCTGCTGACGGTACGGAAAGATGTTCAAACTGTATCATCTAGAGGAAGTAAAAGTCGTAACAAGGTTTCC
652	c1f0d6179a8106064ebcf4cffa5e61c4	OTU_652	117	580	18	GTCGCTACTACCGATCGAGTGGTCAGGTGAACCTTTTGGACAGTATAGTTTTATTGCTAACAGGAATTTAAGTAAATCTTATCACTTAGAGGAAGTAAAAGTCGTAACAAGGTTTCC
653	a360e0bfd84fc4774eb7bd27f39b5e7e	OTU_653	138	580	6	GTCGCTACTACCGATTGAATGGTTTAGTGAGACCCTCGGATTCGTCCCGGCACGGTGGGTTCTCTGCCGAGCCGGTGTAGCGGAGAAGACGGTCGAACTTGATCATTTAGAGGAAGTAAAAGTCGTAACAAGGTTTCC
654	06cd0aa90fe95c1c19160e06205ad03b	OTU_654	132	579	1	GTCGCTACTACCGATTGAATGGCTTAGTGAGGTCTTCGGATCGGCTTTGGGGAGCCGGCAACGGCACCTCATTGCTGAGAGGTTGATCAAACTTGGTCATTTAGAGGAAGTAAAAGTCGTAACAAGGTTTCC
655	ed0190d27de852723f5e75d4f2f12134	OTU_655	136	579	1	GTCGTTACTACCGATTGAATGGTTTAGTGAGGTCTCCTGACTGGCCCCGCTGCCGAGGCTCCGCCTCGGCGCCGGCCGCCGGAAAGTTGCTCAAACTTGATCATTTAGAGGAAGTAAAAGTCGTAACAAGGTTTCC
656	717b855b8707e2aa5965c0ded3704443	OTU_656	108	576	8	GTCACATCACGAAAGCTGGTTGCACCTGAAACCGGTGAGCCAACCCGCAAGGGAGGCAGCTGTTTACGGTGTGATTGGTGATTGGGGTGAAGTCGTAACAAGGTAGCT
657	2f5d32c68ea89c68049da2e690364552	OTU_657	136	575	5	GTCGCTACTACCGATTGAATGGTTTAGTGAGACCTTCGGATTGGAGCCGCCGCGGTCGGCAACGGCCGCGGCGGACACCGAGAAGTCGGCCAAACTTGATCATTTAGAGGAAGTAAAAGTCGTAACAAGGTTTCCG
658	be98899e1f598bb8eacd36bbb287d40c	OTU_658	107	573	10	GTCACACCATGGGAGTTGGTTTTACCCGAAGACGGTGGGCTAACCTTTTAGGAGGCAGCCGGCCACGGTAAGGTCAGCGACTGGGGTGAAGTCGTAACAAGGTAGCC
659	c38b7ef786f0ddf821fce5e1da599726	OTU_659	139	573	1	GTCGCTACTACTGATTGAATAGCAAAGCAAGAACGCTAGATACTTGATAAGCTTGCCAAGTTACTTGTGTGAGCAATTCGAGTCGAAGGCATCTCTAGCTTTATTGTTTAGAGGAAGTAAAAGTCGTAACAAGGTTTCC
660	9db5fbd5f2a78bfad5063292d0085582	OTU_660	113	571	4	GTCGCTACTACCGATTGAATGGTTTAGTGAGGCCTTCGGATCCGCGACTCGTTTGTGGAGAAGTTGGACAAACTCAGTCATTTAGAGGAAGTAAAAGTCGTAACAAGGTTTCC
661	3d64b5024eb7ba7708f8150c8fffa821	OTU_661	128	571	10	GTCGCTCCTACCGATTGAGTGATCCGGTGAATAATTCGGACTGCAGAGATCCCAGTTTCTGGAATCATTTGGAGGAAGTTTAGTGAACCTTATCACTTAGAGGAAGGAGAAGTCGTAACAAGGTTTCC
662	069d07128ba05f19277747dab740bc3e	OTU_662	136	570	2	GTCGCTACTACCGATTGAATGGTTTAGTGAGATCCTTGGATTGGCCCCGCCGCGTCTGGCAACGGTCGCGGCGGAGAGCCGAGAAGACGATCAAACTTGATCATTTAGAGGAAGTAAAAGTCGTAACAAGGTTTCC
663	5786a23ba12c706dbc2a90f824170054	OTU_663	131	569	6	CCGTCGCTCCTACCGATTGAGTGGTCCGGTGAATAATCTGGACTGCTGCAGCGGTTAGCCTTTAACCGATGTCGCAGAAAATTTGGTGAACCTTATCACTTAGAGGAAGGAGAAGTCGTAACAAGGTTTCC
664	98784bbf954f2649d96eb1a75309c6ba	OTU_664	128	568	1	GTCGCTCCTACCGATTGAGTGGTCCGGTGAAAAATTAGGATTGATGTACATGTCGATTGGAGACTATATGTTGATAAATATTGTGAACCTTATTGCTTAGAGGAAGGAGAAGTCGTAACAAGGTTTCC
665	dcd6e299d3a189e22a3692b5f503eaa7	OTU_665	106	568	6	GTCACACCATGGGAGTGGGTTGCACCAGAAGTAGCTAGCTTAACCTTCGGGAGGGCGGTTACCACGGTGTGATTCATGACTGGGGTGAAGTCGTAACAAGGTAGCC
666	a6f4b6a96009eee0230b26cc511ab915	OTU_666	136	566	4	GTCGCTACTACCGATTGAATGGTTTAGTGAGATCTTCGGATTGGAGTCCTCGGTGGCGGCGACGCCGCCTTGGGCAACCGAAAAGTTGAGCTAACTGAATTATTTAGAGGAAGTAAAAGTCGTAACAAGGTTTCCG
667	874312288d2d7e4fbf53bb072b946785	OTU_667	131	565	1	CGTCGCACCTACCGATTGAATGGTCCGGTGAAGCCTCGGGATTGTGGTTTGGTTCCTTTATTGGGACCTGACTGTAAGAACTTGTCTGAACCTTATCATTTAGAGGAAGGTGAAGTCGTAACAAGGTTTCC
668	f30e35481d0e91d50a77e503e25bcd35	OTU_668	132	564	1	GTCGCTACTACCGATTGAACGTTTTAGTGAGGTATTTGGATTGGACCTCTCGAGGCTTGCGCCTCGAGTGTTGTCCGAGAAGACTCCCAAACTTGAGCGTTTAGAGGAAGTAAAAGTCGTAACAAGGTTTCC
669	ff5c3434edf768c0540b34155b8b1931	OTU_669	136	564	3	GTCGCTACTACCGATTGGATGGTTTAGTGAGATCCTCGGATTGGTCCTGGCACAGCGGGCAACCGCCTTGCCATGGCGCCGAGAAGACGACCGAACTTGATCGTCTAGAGGAAGTAAAAGTCGTAACAAGGTTTCC
670	850e468dda733af1b09e4ea723311004	OTU_670	138	561	5	GTCGCTACTACCGATTGGGCGATTTAGTGAGCGCCTCGGATTGGACCCGGAACGATCGGCAACGACCGTACCGCTGTGTGCCGAAAAGACGCGCAAACTTGATCGCCTAGAGGAAGTAAAAGTCGTAACAAGGTTTCT
671	7bce35856a393c7cf5981771c880f55e	OTU_671	123	559	3	GTCGCTACTACCGATTTCGAGTGGTCAGGTGAATCTTTCGGACTGTGAACTTCCTTGAGTTGTTCGCGGAAAGTCAGGTAAATCTTATCACTTAGAGGAAGTAAAAGTCGTAACAAGGTTTCC
672	08b7f1a7f752a892f8c89c91f0d5fc26	OTU_672	131	558	6	GTCGCTACTACCGATTGAATGGCTTAGTGAGCCTTTGGGATCGGCAGCTTGTACCGGCAACGGTAGCAGGCCGCTGAAAACTTATGCAAACTTGGTCATTTAGAGGAAGTAAAAGTCGTAACAAGGTTTCT
673	464f5b6f02a6fcf726fa845861b5b922	OTU_673	128	558	2	GTCGCTCCTACCGATTGAGTGTTCAGGTGAATAATTTGGACTGCAGCTAAGCCAGCTACTGGCTTTTACTGTGGAAAGTTTGGTGAACCTTAACACTTAGAGGAAGGAGAAGTCGTAACAAGGTTTCC
674	878dbd574ceac69ebc55d7dac50fa8ed	OTU_674	132	557	2	GTCGCACCTACCGATTGAATGACTAGGTGAAAAGTCGGGACTGTGGCTTCGTTTGCTTCATTGCAAACTTAGCTGTGGGAACTTCTTTTAACCTATTTATTTAGAGGAAGGTGAAGTCGTAACAAGGTTTCC
675	13a038346d4637d8a49daee352c78998	OTU_675	122	554	3	GTCGCTCCTACCGATTGAGTGATCCGGTGAATAGTTCGGACTGCGATCTGTCAGCAGACACCTCGCGGGAAGTTCCGTGAACCTTATCACTTAGAGGAAGGAGAAGTCGTAACAAGGTTTCC
676	df7703cb380c3b26cb37833fdab4f7fb	OTU_676	137	554	7	GTCGCTACTACCGATTGAATGGTTTAGTGAGGCCTCCGGATTGGCACTGTCAGATATGCCTCGGCGTATCCGACGGACGTCAAGAAGTTGGTCAAACTTGATCATTTAGAGGAAGTAAAAGTCGTAACAAGGTTTCC
677	b67c9c562a2fb184c15f836dc7f926f1	OTU_677	108	553	3	GTCAAGCCACGAAAGTTGGGAGGGCCCGAAGTCGCTGAGCTAACTCGCAAGAGAGGCAGGCGCCGAAGGTCAGCTCGACAATTGGGACTAAGTCGTAACAAGGTAGCC
678	094dc8411b8b0c699e71d1c897160808	OTU_678	136	553	10	GTCGCTACTACCGATTGAATGGCTTAGTGAGGTCCCCGGATTCGCGCCGCCGCGGGCGGCGACGCTCGCAGCGGATGCGGAGAAGCCGACCGAACTGTGTCATTTAGAGGAAGTAAAAGTCGTAACAAGGTTTCCG
679	453e16eb6af4a26e5af32db32f265b78	OTU_679	136	551	3	GTCGCTACTACCGATTGAATGATTTAGTGAGGTCTTCGGACTGGTGCGCGGCAATGCGTCGGCATTGCCGATGTTGCCGGGAAGATGACCAAACTTGATCATTTAGAGGAAGTAAAAGTCGTAACAAGGTTTCCGT
680	5546a6d151c0e22c4bf20324936285a3	OTU_680	127	551	11	GTCGCTCCTACCGATTGGATGATCCGGTGAGCTATTCGGACTTACGCTTTGTCGATTTTCGGCTTTGTGTGGGAAAGTCTCGCGAACCTTATCATCTAGAGGAAGGAGAAGTCGTAACAAGGTTTCC
681	a11aaae3f0541c814de37731fbd1e80a	OTU_681	131	551	15	CGTCGCACCTACCGATTGAATGGTCTGGTGAACTGTCCGGACTTTGAGAAAATTCCTTTATTGGAGTCTTCACAGAGGAAGTTCTGTAAACCCTACCATTTAGAGGAAGGTGAAGTCGTAACAAGGTTTCC
682	ae1df6275c489f1633c9ba39d998b4b5	OTU_682	136	551	1	GTCGCTACTACCGATTGAACGTTTTAGTGAGGTATTTGGACTGAGCCTTGCCAAGGTTTTTGCCTTGGCTTGTTGCTCGGGAAGACTCCCAAACTTGAGCGTTTAGAGGAAGTAAAAGTCGTAACAAGGTTTCCGT
683	7209f7d12b376f135bd5cc4d4ebd2136	OTU_683	131	550	1	CCTCGCACCTACCGATTGAATGGTTCGGTGAAATCTCCGGATTGGAGCACGCAAGCTTCACGGCGAACGTGCTTTGAGAAGTTGATTAAACCTCACTATTTAGAGGAAGGTGAAGTCGTAACAAGGTTTCC
684	042a673c4d3fb7d11f8af0749cd95818	OTU_684	136	549	4	GTCGCTACTACCGATTGAATGGTTTAGTGAGATCCTCGGATTGGTCCCGTATTGGAGGGCAACCTTCGAGACGGTGTGCCGAGAAGACGATCAAACTTGATCATTTAGAGGAAGTAAAAGTCGTAACAAGGTTTCC
685	e1df423188398df4d146d81a5c1f789a	OTU_685	107	548	11	GTCACACCATGGGAGTTGGTTTCACCCGAAGATGGTGCGCTAACCTTTTAGGAGGCAGCCAGCCACGGTGGGATCAGCGACTGGGGTGAAGTCGTAACAAGGTAGCC
686	962ac0b08d31b1dd8bef31c1f78395f5	OTU_686	106	548	5	GTCGTTTCTTCCGACTGATACTCATTGTGAGTTGCAAGGATCCTTCGTTGGAGAATTGCTACGAATGCTTTGTATTGGAGGAAGAAAAAGTCGTAACAAGGTTATC
687	69c302f2a2fbb2013ff1e04b372a1280	OTU_687	128	547	13	GTCGCTCCTACCGATTGAGTGATCCGGTGAATAATTCGGACTACAGGTCGCGCAGTTTCTGTGCTTCACTGCAGGAAGTTTAGTGAACCTTATCACTTAGAGGAAGGAGAAGTCGTAACAAGGTTTCC
688	ab1c06121977e893b9f84a364356a1cf	OTU_688	132	547	4	GTCGCTACTACCGATTGGACGTTTTAGTGAGGATTTTGGACTGGGCCTTTGAAGGCTAACGTCATCATTGTTGCCTGGGAAGATCTCCAAACTTGAGCGTTTAGAGGAAGTAAAAGTCGTAACAAGGTTTCC
689	b775eb24c1510909e4c7a49d129ac736	OTU_689	123	546	5	GTCGCTGCAACTGATTGGGTGATCTGGTGAACATCTTGGACTGGCATGTTCAAATCAGAGCAAGCTGGAAAAGGACGTAAATCAGGTACATCTAGAAATTGCAAAAGTCGTAACAAGGTTTCT
690	c2153c88bdbb69fc11b105f482f24525	OTU_690	104	545	16	GTCAAGCCATGGAAGCCGGTTCTATCTAAAGTCGTTAGCCTAACTTCGGAGGGCGGCGCCTAGGGTAGTGTCGGTGACTGGGGCTAAGTCGTAACAAGGTAGCA
691	021246f727f2e91d3af07fd317397f1a	OTU_691	132	543	1	GTCGCACCTACCGATTGAATGACTCGGTGAAAAATCGGGACTGTGGTCTCGCTTGCTTCATTGCAAGCTTGACTGTGGGAACTTTCTTTAACCTATTCATTTAGAGGAAGGTGAAGTCGTAACAAGGTTTCC
692	c4c08ffd78f76a5a4fe85763ff88439e	OTU_692	131	543	11	GTCGCTACTACCGATTGAATGGCTTAGTGAGCCTTTGGGATTGGCAGCTTGTACCGGCAACGGTAGCAGGCAGCCGAAAACTTAGGCAAACTTGGTCATTTAGAGGAAGTAAAAGCCGTAACAAGGTTTCT
693	a84a7847d38aff4c6c9ea7c3517b360e	OTU_693	132	542	1	GTCGCTCCTACCGATTGAATGGTCCGGTGAAGCGTTTGGACTATGGTTTTCTGACGGTTCGCCATTGGATTACCGTGGGAAATTCGTTAAACCTTATCGTTTAGAGGAAGGAGAAGTCGTAACAAGGTTTCC
694	0489b9b73dbbc2c4813c007edefde822	OTU_694	136	541	2	GTCGCTACTACCGATTGAATGGTTTAGTGAGATCCTCGGATTGGTTTCGTCGGGTTGGGTAACTGACCTGACGCTTAACCGAGAAGACGATCAAACTTGATCATTTAGAGGAAGTAAAAGTCGTAACAAGGTTTCC
695	45b70deba14b93424d2dd18ba810545f	OTU_695	221	541	4	GTCGCACCTACCGATTGAGCGTTCCGGTGAGTTGTCGGGATTGTAGTTGGATCCTTTATTGGATCCTGCCGCGAGAACCTCCACAAACCTTATCGCTTAGAGGAAGGTGAAGTCGTAACAAGGTTTCCGTAGGTAAGAATAAATATGATGTTCCCGATGTACTCATGTCTCTTTTGATCTGATCATGATCTTACACCCTTATCTTTCTCTCTCCTTGTTTT
696	42569f10aaf4e61bc2c9e2dec599e847	OTU_696	122	540	1	GTCGCTCCTACCGATTGAGTGATCCGGTGAATAGTTCGAACTGCGATCTGTCAGCAGACACCTCGCGGGAAGTTCCGTGAACCTTATCACTTAGAGGAAGGAGAAGTCGTAACAAGGTTTCC
697	d4128bea4959de725ec8a75ae1ff61e8	OTU_697	136	539	2	GTCGCTACTACCGATTGAGTGTTTTAGTGAGGTCCTCGGATTGCTTGCCAGTGCGGGTTAACGCCTGTGGTTGGTGTGGCGAGAAGACGACCAAACTGTAGCACTTAGAGGAAGTAAAAGTCGTAACAAGGTTTCC
698	08e35838ae97a7fa904e35f5576116fa	OTU_698	128	535	13	GTCGCTCCTACCGATTGAGTGATCCGGTGAATAATTCGGACTGCAGAGATTCTGGATTCTGGAATCATTTGGAGGAAGTTTAGTGAACCTTATCACTTAGAGGAAGGAGAAGTCGTAACAAGGTTTCC
699	a8f0974acd811ff5069ea686d7f57dc0	OTU_699	131	533	5	CCGTCGCTCCTACCGATTGAGTGATCCGGTGAATAATTCGGACTGCGACACTGTTTGGTTCCTGAACGTTGTTGCGGAAAGTTTAGTGAACCTTATCACTTAGAGGAAGGAGAAGTCGTAACAAGGTTTCC
700	f24e9cb874849251646246909752124c	OTU_700	105	531	2	GTCGTTTCTTCCGACTGATACTCATTGTGAGTTGCAAGGATTCAACTTGAAGAATTGCTGCGAATGCTTTGTATTGGAGGAAGAAAAAGTCGTAACAAGGTTATC
701	e300a042c90714ceff84d7c5265e31f3	OTU_701	132	531	2	GTCGCTACTACCGATTGAATGGTTTAGTGAGGACTTTGGATTGCCGCCGTCGCGTCTCCGGACGCGATCGGAGGGCAAGAAGCTGTTCGAACTTGATCATTTAGAGGAAGTAAAAGTCGTAACAAGGTTTCC
702	ba87ed2acfe836d724dc73654a16a33d	OTU_702	106	531	1	GTCACACCATGGGAGTTGGTTGCACCAGAAGTGGGTAGTCTAACCTTCGGGAGGGCGCTCACCACGGTGTGGTCCATGACTGGGGTGAAGTCGTAACAAGGTAGCC
703	2c97b2081f579cdc8b64ec246618b4d2	OTU_703	112	531	2	GTCACACCACGAAAGCTGTTTGTACCCGAAATCATTTTAGCTGACCCTTTTTGGGGGGGGCGGATGCTGAAGGTGTGGATGGTGATTGGGGTGAAGTCGTAACAAGGTAGCT
704	a82bfbfa67981111199e30ba113afc3d	OTU_704	131	530	3	GTCGCTCCTACCGATTGAGTGGTCCGGTGAGGCTTTGGGAGAGCCGGATGGACTGTGTTTCACAGACTATTTGGCTTGAACTTAGTCAAACCTTACTACTTAGAGGAAGGAGAAGTCGTAACAAGGTTTCC
705	1315758fa2cf496a28751fa116fae8ac	OTU_705	121	530	2	GTCGCACCTACCGATTGAATGGTCCGGTGAAGTCTTCGGACTGTGGCTTGCCTCGAGCTCGCCGCGGGAAGTTGAGTAAACCTTACCATTTAGAGGAAGGTGAAGTCGTAACAAGGTTTCC
706	f3959299aba614d709694a1993211c91	OTU_706	106	529	12	GTCACGCCATGGGAGTTGGTTTTACCTTAAGCCGGTGCGCTAACCGTAAGGAGGCAGCCGTCCACGGTAGGGTCAGCGACTGGGGCGAAGTCGTAACAAGGTAACC
707	24822864978c9859615656a76f7bc481	OTU_707	127	528	2	GTCGCTCCTACCGATTGAGTGATCCGGTGAATAATTCGGACTGCGATATACGAGGAAACTCAGTATTTTGTAGGAAGTCTAGTAAACCTTATCACTTAGAGGAAGGAGAAGTCGTAACAAGGTTTCC
708	93c011d74020b41e6c86450135a3bfdb	OTU_708	132	527	2	GTCGCTACTACCGATTGAATGGTTTAGCGAGATTCTCGGATCGAGCCCTGGCCGTGCGCAAGCGTGGTCGAGGCTTGAGAAGAAACTCAAGCTTGATCATTTAGAGGAAGTAAAAGTCGTAACAAGGTTTTC
709	931f6a267e8e8f62250df4054904300e	OTU_709	131	526	6	CGTCGCTACTACCGATTGAATGTTTTAGTGAGGTCCTCGGACTGTTGCTTTGGCGGGTCATACTGCCTTGGTAGCGGGAAGACGACCAAACTGTAGCATTTAGAGGAAGTAAAAGTCGTAACAAGGTTTCC
710	ef105ee21612c7757e35d33b85d061de	OTU_710	107	525	5	GTCACACCATGGGAGTTGGTTTCACCCGAAGATCGTGCGCTAACCTTTTAGGAGGCAGCGAGCCACGGTGGGATCAGCGACTGGGGTGAAGTCGTAACAAGGTAGCC
711	a627aa93561d1164d107df1c3a7d6237	OTU_711	131	524	1	CGTCGCACCTACCGATTGAATGGTCCGGTGAAGCCTCGGGATTGTGCCTAGTTCCCTTTATTGGGAGTTTGTCGCGAGAACTCGTCTAAACCTTATCATTTAGAGGAAGGTGAAGTCGTAACAAGGTTTCC
712	10c7c3774c457183a3c193c82e612a62	OTU_712	111	521	3	GTCGCTCTTACCGATGGACTTATTTGTGAGTTTAAGGGACTAAAATTTACTTTTCGGAAACTTACGCGAACAACTGGGTCTAAAGGAAAGAGAAGTCGTAACAAGGCATCT
713	90c1fe3062cc00de9b78c5306e9d67be	OTU_713	105	520	9	GTCGTTTCTTCCGACTGATACTCATTGTGAGTTGCAAGGACCTGTAATGGGAAATTGCTGCAAATGCTTTGTATTGGAGGAAGAAAAAGTCGTAACAAGGTTATC
714	85ce1a7493b7fbc9b4ba4cb4f09fdc69	OTU_714	131	518	9	CGTCGCTCCTACCGATTGAATGGTCCGGTGAAATCTTCGGATTGTGCGCAGCGAAGGTTCGCTGGAGCTGTGCGTGAGAAGTTGATTAAACCTTATCATTTAGAGGAAGGAGAAGTCGTAACAAGGTTTCC
715	c5443a929f221e41cb8390cefdf1602d	OTU_715	128	516	2	GTCGACTCTACCGATTGAATGGTTCGGTGAAAACTCCGGACCGTGGCATTGTCCTTCATTGGACTTTGCCGTGGGAAGTTGTTTAAACCTCATCATTTAGAGGAAGAATAAGTCGTAACAAGGTTTCC
716	78fc9fc2dd026e090aa27fd1185b5d3b	OTU_716	132	516	6	GTCGCACCTACCGATTGAATGATTCGGTGAAAATTTCGGACTGTGCCACTGTGCCCTTCATTGGGCGTAGTGATATGGGAAGTTATTTAAACCTCATCATTTAGAGGAAGGTGAAGTCGTAACAAGGTTTCC
717	e7650b1587b0004715e8adb18a6f812b	OTU_717	162	516	12	GTCGCTACTACCGATCGGATGGTTTGGTGAGGCCGCTGGACGGGAACCGGGCCGGTCTGCCCTGGCCCCTCCTTGTGGGGGGTTCAGGCTTCCGGCTGCAGGGGCCCGGAAGGCGTCCGAACTCGATCATTTAGAGGAAGTAAAAGTCGTAACAAGGTTTCC
718	d132d54c10ca45104bbbb3567e5b4f87	OTU_718	104	515	7	GTCACACCATGGGAGTTGACATTGGCAGAATACATTGAGCTAACTTCGGAAGCAGGTGTAGAAGCTAGTGTTGATGACTGGGGTGAAGTCGTAACAAGGTAGCA
719	84d89c93492a30a757fb23707a2d7212	OTU_719	136	515	6	GTCGCACCTACCGATTGAATGGTCCGGTGAAATCTTTGGACCGTGACATTGTCTTACTTTCGGGTAAGACGTTGTCGTGGGAAGTGGATTAAACCTTATCATTTAGAGGAAGGTGAAGTCGTAACAAGGTTTCCGT
720	ca3bfeb20526cd9659491470bc91b1f6	OTU_720	136	515	9	GTCGCTACTACCGATTGAATGGTTTAGTGAAGGTTTTGGACTGGAGCTCCCTTGCTCAGCGATGGGCGAGGGGGAGTCCGGGAAGCCCCCTGAACTGTATCATTTAGAGGAAGTAAAAGTCGTAACAAGGTTTCCG
721	465b1b0c5643ac1c3daa80f917ec5d43	OTU_721	126	515	3	GTCGCTCCTACCGATTGAGTGATCCGGTGAATAATTCGGACTGCGATTATCTGGTTTACCTTATAATTGCGGGAAGCTTAGTGAACCTTATCACTTAGAGGAAGGAGAAGTCGTAACAAGGTTTCC
722	18ac6b4fea58a6f67de1f12f9d4fbd56	OTU_722	131	515	5	CGTCGCACCTACCGATTGAATGGTCCGGTGAAGCCTCGGGATTGTGGTGAGTTCCCTTTATTGGGAGTTCGTCGCGAGAACTTGTCTAAACCTTATCATTTAGAGGAAGGTGAAGTCGTAACAAGGTTTCC
723	689b53a9f47ef82d2992e282f60c1320	OTU_723	126	514	12	GTCGCTCCTACCGATTGAGTGATCCGGTGAATACTTGGGACCGCGTCGATCCCATCTTTGGGTTCGATGTGGAAACTTGAGTGAACCTTATCACTTAGAGGAAGGAGAAGTCGTAACAAGGTTTCC
724	73e3b135149a59d8f3552d967858c3db	OTU_724	128	513	13	GTCGCACCTACCGATTGAATGGTCCGGTGAAATCTTCGGATCGCGGCTTGATCCTTCATTGGATCGGGCTGCTAGAAGTTGATTAAACCTTGCCATTTAGAGGAAGGTGAAGTCGTAACAAGGTTTCC
725	e29dbbc02396dda7f1b3491115bd2878	OTU_725	131	513	1	CGTCGCACCTACCGATTGAATGGTCCGGTGAAGCCTCGAGATTGTGGTTGGGTTCCTTTATTGGAGCCTGACTGTGAGAACTTGTCTAAACCTTATCATTTAGAGGAAGGTGAAGTCGTAACAAGGTTTCC
726	e5b14aa2c6a1fb8a9277fbba4713ba9e	OTU_726	131	512	4	CGTCGCTACTACCGATTGAACGTTTTAGTGAGGCATTTGGATTGGACGTGCAGGCGTTCGCGCGCCTACGCGGCCGAGAAGACTTCCAAACTTGAGCGTTTAGAGGAAGTAAAAGTCGTAACAAGGTTTCC
727	f207728bb8ebf43ae69f141bc9dccbf0	OTU_727	136	510	3	GTCGCTACTACCGATTGGATGGTTTAGTGAGATCCTCGGATTGGTCCCGGCATGGTGGGTTACCGCCGCGCCGGCGTGCCGAAAAGACGATCAAACTTGATCATCTAGAGGAAGTAAAAGTCGTAACAAGGTTTCC
728	2c61f86f199de7ce18a563f2bd890c8f	OTU_728	132	509	1	GTCGCACCTACCGATTGAATGATTCGGTGAAAATTTCGGACCGTGCTGCCGTGCCCTTCACTGGGCGTAGTGGCGTGGGAAGTTATTTAAACCTCATCATTTAGAGGAAGGTGAAGTCGTAACAAGGTTTCC
729	b10fe5234a69a3c29e6cc6bc06682a12	OTU_729	131	509	14	CCGTCGCTCCTACCGATTGAGTGATCCGGTGAATAATTCGGACTGCGGCATTGACCGGTTCCCGATCGTTGCTGCGGAAAGTTTAGTGAACCTTATCACTTAGAGGAAGGAGAAGTCGTAACAAGGTTTCC
730	15092f8ca06ad77c070694cddd53cb3f	OTU_730	131	509	6	GTCGCTACTACCGATTGAACGTTTTAGTGAGGTATTTGGATTGGGCCTCGCCGTGTTTGCGCCCGGCTTGTGTCCGAGAAGACTCCCAAACTTGAGCGTTTAGAGGAAGTAAAAGTCGTAACAAGGTTTCC
731	0c5aaaaa4ccda238ce3f7cc3b4705852	OTU_731	133	509	1	GTCGCTACTACCGATTGAACGTTTTAGTGAGGTATTTGGACTGAGCCTTCGGAGGTTTTTAATCTCCGTTGTTGCTCGGGAAGACTCCCAAACTTGAGCGTTTAGAGGAAGTAAAAGTCGTAACAAGGTTTCC
732	8df88a6036aa2d2bbaffd117b69e3e91	OTU_732	132	509	3	GTCGCACCTACCGATTGAATGGTTCGGTGAAGATTTCGGACTGTGTCGCTGTACCCTTCATTGGGCATAGTGACGCGGGAAGTTATTTAAACCTCATCATTTAGAGGAAGGTGAAGTCGTAACAAGGTTTCC
733	50e6527b7299217ba03b51b7e697563c	OTU_733	136	508	3	GTCGCTACTACCGATTGAATGGTTTAGCGAGAACCTCGGATTGAATCCATGCCGAGCGCAAGCTTGGTTTTTGGGTTTGAAAAGAAGCTCAAGCTTGATCATTTAGAGGAAGTAAAAGTCGTAACAAGGTTTTCGT
734	3551dfc097dc66eba95f86651bfcf05c	OTU_734	131	508	4	CCGTCGCTCCTACCGATTGAGTGATCCGGTGAATAATTCGGACCGCTACAATGTTTGGATCCCTAACGTTGCGGCGGAAAGTTTGGTGAACCTTATCACTTAGAGGAAGGAGAAGTCGTAACAAGGTTTCC
735	5e8291f997b21b6b2f8a0588a1722294	OTU_735	118	506	2	GTCGCTCCTACCGATTTCGAGTGGTCCGGTGAACCTTTCGGATGTGAAAATTCATTTTTTTGCAGAAGTCAAGTAAACCACATCACTTAGAGGAAGGAGAAGTCGTAACAAGGTTTCC
736	b953f5f16606a0784582be7b7cc23739	OTU_736	128	506	11	GTCGCTCCTACCGATTGAGTGTTCAGGTGAATAATTTGGACCGCAGCTAAGCCAGCTACTGGCTTTTACTGTGGAAAGTTTGGTGAACCTTAACACTTAGAGGAAGGAGAAGTCGTAACAAGGTTTCC
737	e29c01ad2658fb1b298d93d4985911e9	OTU_737	133	505	7	GTCGCTCCTACCGATTGAATGATCCGGTGAGCTTTTTGGACCCTAGCAACGGCTTTGGTTCGCCAAACTGATGTTGGGGGAAGATACGCAAACCTTATCATTTAGAGGAAGGAGAAGTCGTAACAAGGTTTCC
738	23d01b7c9db0321fab279c8910715d03	OTU_738	107	505	6	GTCAAGCCACGAAAGCGGGGGGCATCCGAAGTCGTCGAGCTAACCCTCTGGGAAGCAGACGCCGAAGATGAACTCTGTGATTGGGACTAAGTCGTAACAAGGTAGCC
739	4896ca355e3833aa7c3b0cc4d657bc98	OTU_739	106	504	1	GTCCCACCATGGGAGTGTATTGCACCAGAAGTGGGTAGTCTAACCTTCGGGAGGGCGCTCACCACGGTGTGGTCCATGACTGGGGCGAAGTCGTAACAAGGTAGCC
740	c6c3c0eb0f7fb326dc4437aecf2476a2	OTU_740	116	504	2	GTCGCTACTGCCGACATCGATCTGGCGTCAAGAGACTGGACGGGCTCCGCTCGCGGAGCTCGAAAAGTAACTGAGCGTCGGTTCGGGGAGGCCGTAAAAGTCGTAACAAGGTATCG
741	003af8305fab3e330d1558a55a28f827	OTU_741	131	503	1	CCGTCGCTCCTACCGATTGAGTGATCCGGTGAATAATTCAGACTGCCACGGCGTTTGGTTCTTGAACGTGGTTGTGGAAAGTTTTATGAACCTTATCACTTAGAGGAAGGAGAAGTCGTAACAAGGTTTCC
742	e8b47f76bf7c7edbed7f21a5af45e1d1	OTU_742	131	503	5	GTCGCTACTACTGATTGGATGTTTAAGCGAGGTTCTCGAACTGCTAGCGACTGATCTTCGGTGATGTTGCAGTGTGGGAAGTGAACCTAGCTTTGGTGTCTAGAGGAAGTAAAAGTCGTAACAAGGTTTCC
743	5ea5c8bc6c0c7662aad6d6bb83d56093	OTU_743	104	503	6	GTCACACCATGGGAGTTGGTTCTACCCGACGGCCGTGCGCTAACTTTTGAGGCAGCGGACCACGGTAGGATCAGCGACTGGGGTGAAGTCGTAACAAGGTAGCC
744	f892cc72edf02588ad07e639967f40e8	OTU_744	108	502	12	GTCACATCATGAAAGCCGGTTGTACCCGAAGTCGCTGAGCCAACCCGCAAGGGAGGCAGGTGCCGAAGGTATGGCTGGTAATTGGGATGAAGTCGTAACAAGGTAGCC
745	d23e5a9530cab37b5d743e657abfa990	OTU_745	127	501	6	GTCGCTCCTACCGATTGAGTGATCCGGTGAATACTTCGGACTGCATTATGGTCGGTTCCCGGTTATTTTGCAGAAAGTTGAATAAACCTTATCACTTAGAGGAAGGAGAAGTCGTAACAAGGTTTCC
746	ac01edf9c25cdeb30ce4f74cb03ec9a0	OTU_746	136	499	1	GTCGCTACTACCGATTGAATGGTTAGTGAGAATTTTGGACTGGAGCTTTCTTGTTCAGCAATGAACGAGAGAGAGTCCGGGAAGTCATTCTAACTGTATCATTTAGAGGAAGTAAAAGTCGTAACAAGGTTTCCGT
747	88165f29f4b5efa7571518facc078ff6	OTU_747	131	499	1	CCGTCGCTCCTACTGATTGAGTGATCCGGTGAATATTTTGGACTGCAGCAAGGCTCAGATCCTGAGTTTTGCAGCATAAAGTTTAGTGAACCTTATCACTTAGAGGAAGGAGAAGTCGTAACAAGGTTTCC
748	880201b70f83a58e256cfdee8d29ecb3	OTU_748	136	498	1	GTCGCTACTACCGATTGGATGGTTTAGTGAGGTCCTCGGATCGGCCCCGCCGGGGTCAGTCACGGTCCTGGCGGAGCGCCGAGAAGACGATCAAACTTGACTATCTAGAGGAAGTAAAAGTCGTAACAAGGTTTCC
749	ee0394ea5495adea64425c4e5882980a	OTU_749	110	498	12	GTCACACCATGGGAGTTGGTTCTACCCGAAGGTAGTGGGCTAACCAGTTTACTGGAGGCAGCTAACCACGGTAGGGTCAGCGACTGGGGTGAAGTCGTAACAAGGTAGCC
750	2f938c59f97ae941ffb211bf2b927fd9	OTU_750	131	498	1	CCGTCGCTCCTACCAATTGAGTGATCCGGTGAATAATTCGGACCGCCACAATGTTCAGATCCTGAACGTTGCAGCGGAAAGTTTAGTGAACCTTATCACTTAGAGGAAGGAGAAGTCGTAACAAGGTTTTC
751	2dfdcc1e4749cda73d33da17bfa18938	OTU_751	136	496	5	GTCGCTACTACCGATTGGATGGCTTAGTGAGACCAGCGGAACGGTAGGCGAGTTGCTCTTCGGGGTGACAAGCTGGCTGTGAAGCCGGTCAAACTTGACTGTCTAGAGGAAGTAAAAGTCGTAACAAGGTATTCGT
752	0eb97917497b12a77c48048f6ec8bf99	OTU_752	102	495	10	GTCACACCATGGGAGTGGGTTGCTCCAGAAGTAGATAGCTTAACGAATGGGCGTTTACCACGGAGTGATTCATGACTGGGGTGAAGTCGTAACAAGGTAGCC
753	500a84e3e094b39afd0bc6f62dd4ebe8	OTU_753	106	495	1	GTCACACCATGGGAGTTGGTTCTACCCGAAGGCGCTGCGCTGACCGCAAGGAGGCAGGCGACCACGGTAGGGTCAGCGACTGGGGTGAAGTCGTAACAAGGTAGCC
754	40de175dadac414ae37609ea4c0718e2	OTU_754	132	495	2	GTCGCACCTACTGATTGAATGACTCGGTGAAAAATTGGGACTGTGAGAACAATCGATTCAGTTCGAATGTACTCGTGGAAACTTTTTTTAACCTCGCCATTTAGAAGAAGGTGAAGTCGTAACAAGGTTTCC
755	c9fcda272085e366f499248c030882de	OTU_755	131	495	4	CGTCGCACCTACCGATTGAGTGATCCGGTGAAGCCTCGGGATTGTGGCTTGTTTCCTTTATTGGAACCTTGCCGCGAGAACCTGTCTAAACCTTATCACTTAGAGGAAGGTGAAGTCGTAACAAGGTTTCT
756	c1a9a50a19a5120716bf7b419fbef15c	OTU_756	132	494	3	GTCGCTACTACCGATTGAATGGCTTAGTGAGGTCTCTGGATTGACGCTGAGGAGCCGGCAACGGCACCTCGTTGTTGAGAAGTTGATCAAACTTGGTCATTTAGAGGAAGTAAAAGTCGTAACAAGGTTTCC
757	e91f69897e9eb5a3b58a1761d7964007	OTU_757	136	493	1	GTCGCTACTACCGATTGGATGGTTTAGTGAGATCCTCGGATTGGTCCTGGCGTGACGGGCAACCGTCGTGCCAGCGCGCCGAGAAGACGATCGAACTTGATCATCTAGAGGAAGCAAAAGTCGTAACAAGGTTTCC
758	e75248890460dbdc13dfc581f4cadba1	OTU_758	131	493	15	CGTCGCTCCTACCGATTGAATGTTTCGATGAGTAATTCGGAGGAGGTAGCCGAAGGCGTCAGCTGGAGGCCTCAGCCAAAGTTTTGCAAATCTGAACATTTAGAGGAAGGAGAAGTCGTAACAAGGTTTCC
759	9371c786951186f254e9c2456f02085a	OTU_759	131	492	4	CGTCGCACCTACCGATTGAATGGTCCGGTGAAGCCTCGGGATTGTGGTTAGTTTCCTTCATTGGAAGTTAGTCGCGAGAACTTGTCTAAACCTTATCATTTAGAGGAAGGTGAAGTCGTAACAAGGTTTCC
760	ebab886970f14b6113165e165bf5cd66	OTU_760	131	491	13	CGTCGCTCCTACCGATTGAATGTGCCAGTGAAAAGTTCGGATTGGGAGTGGGAGACAGCAATGTATCCTACTTCCGAGAAAATCTTTAAACTTTCCCATTTAGAGGAAGGAGAAGTCGTAACAAGGTTTCC
761	0b8755be8626c60f61a4e4e4349f4de0	OTU_761	131	491	6	CCGTCGCTCCTACCGATTGAGTGATCCGGTGAATAATTCGGACTGCAGCAATGTTCAGCTCCTGAATGTTGCAGCGGAAAGTTTAGTGAACCTTATCACTTAGAGGAAGGAGAAGTCGTAACAAGGTTTCC
762	d8c30b7c0686545665973833effa306d	OTU_762	131	491	1	CGTCGCTACTACCGATTGAATGATCTTGTGAGAATGACTGTTCCCGTACGCCCTTTACGGGCGGTCGGTTTTTAATTAAGTCACGTCAAACAAGATTATTTAGAGGAAGTAAAAGTCGTAACAAGGTTTCC
763	f98b0bf910f15b365fb01a50d12e20f3	OTU_763	131	489	10	CCGTCGCTCCTACCGATTGAGTGATCCGGTGAATATTTCAGACTGCGCTTAGTTTCGGTCTCCGAAGCTTAGCGTGGAACGTTTCGTGAACCTTATCACTTAGAGGAAGGAGAAGTCGTAACAAGGTTTCC
764	16dd6ceb98ba0a456f9edd4148681d5d	OTU_764	104	488	1	GTCACACCATGGGAGTTGGTTCTACCCGACGGCCGTGCGCTAACTTTTGAGGCAGCGGACCATGGTAGGATCAGCGACTGGGGTGAAGTCGTAACAAGGTAGCT
765	e0fb44ccb7dd6bcde2060254ded7753c	OTU_765	131	488	4	CGTCGCACCTACCGATTGAATGGTCCGGTGAAATTTTCGGACCGGGGCAATGTCGCCTAACGGGGACGCTGCTCTGGGAAGTTACTTAAACCTTACCATTTAGAGGAAGGTGAAGTCGTAACAAGGTTTCC
766	b65b5b9d77ac5d1d8c0b0e79688a6a43	OTU_766	104	488	10	GTCACACCACGAAAGTGGTCTTAACCAGAAGTGAGTGAGCTAACTTCGGAGGCAGCTTACCAAGGTTGAGGCCGTGATTGGGGTGAAGTCGTAACAAGGTAGCC
767	57040e370e218101285986eba58db735	OTU_767	136	487	1	GTCGCTACTACCGATTGAACATTTTAGTGAGGTCCTCGGATCGGCCCCGCCGGGGTCGGTCACGGCCCTGGCGGAGCGCCGAGAAGACGATCAAACTTGACTATCTAGAGGAAGTAAAAGTCGTAACAAGGTTTCC
768	3694ceaf7873682900475b21c10c7a71	OTU_768	136	486	6	GTCGCTACTACCGATTGAATGGTTTAGTGAGATCTCCGGATTGGCACCATCGAGGCTTCACGGCCTTGACGGAAAGTCGAAAAGTTGCTCAAACTTGATCATTTAGAGGAAGTAAAAGTCGTAACAAGGTTTCCGT
769	d830059086f50d8a3ca3773bc8e5e57c	OTU_769	106	486	2	GTCGTTTCTTCCGACTGATACTCATTGTGAATTACGGAGATAGATTTGTCTAAAACTGTTGTGAATGCTGGGTATTGGAGGAAGAAAAAGTCGTAACAAGGTTATC
770	875c5d64a3087ce5af37c7415e127154	OTU_770	127	485	15	GTCGCTCCTACCGATTGAATGTTCCGGTGAGCTCTTCGGACTGCGCGGTCTGCAGTTTCTGCGTTCCGTGCGGAAAGTTGCGCAAACCTTAACATTTAGAGGAAGGAGAAGTCGTAACAAGGTTTCC
771	b557c8e1f5aacd0545819e9cbd5d83c6	OTU_771	108	481	1	GTCGTTTCTTCCGACTGATACTCATTGTGAATTGTGAGGATAGTGAAAATGCTGAATTTGTTGTAAATGCTGGGTATTGGAGGAAGAAAAAGTCGTAACAAGGTTATC
772	53a48049ebb55e25c15da6311f84da1c	OTU_772	131	480	7	CCGTCGCTCCTACCGATTGAGTGATCCGGTGAATAATTCGGACTGCGGCATTGTTCAGATCCTGGACGTTGCTGCGGAAAGTTTAGTGAACCTTATCACTTAGAGGAAGGAGAAGTCGTAACAAGGTTTCC
773	a9f35f679143382e64b5358eb933acca	OTU_773	133	480	8	GTCGCACCAACCGATTGGATGTTTTGTTGAAATATGTGGATATCTTTGTGTATGGCTTGATTGCTGTTGTGCGAGGGTAGAAGTGTATTAAAACTGAATATCTAGAGGATGGTGAAGTCGTAACAAGGTTTCC
774	60a65b12b440aaf8e49aac902d70f550	OTU_774	131	480	4	CGTCGCACCTACCGATTGAATGGTCCGGTGAAGCCTCGGGATTGTGGCTGGTTTCCTTTATTGGAGGTCGGTTGCGAGAACTTGTCTAAACCTTATCATTTAGAGGAAGGTGAAGTCGTAACAAGGTTTCC
775	d80ef3f744ffb64e542b2564a8f0f2e5	OTU_775	106	479	1	GTCACACCATGGGAGTTGGTTCTACCCGAAGACGGTACACTAACCGTAAGGAGGCAGCCGGCCACGGTAGGGTCAGCGACTGGGGTGAAGTCGTAACAAGGTAGCC
776	243d2b94f8fc61894c8c82fe402fd904	OTU_776	131	477	3	CGTCGCACCTACCGATTGAATGGTCCGGTGAAGCCTCGGGATTGTGCCTAGTTCCCTTCATTGGGAGTTTGTCGCGAGAACTTGTCTAAACCTTATCATTTAGAGGAAGGTGAAGTCGTAACAAGGTTTCC
777	3cfffb73639800f2d1431f29d129c515	OTU_777	136	477	2	GTCGCTACTACCGATTGAATGGCTTAGTGAGGTCCCTGGATTCGCGCCGCCGCGAGCGGCAACGCTTGCGGTGGATGCGGAGAAGCTGACCAAACTGTGTCATTTAGAGGAAGTAAAAGTCGTAACAAGGTTTCCG
778	0c93c8e6117dac4ef98eefb2ef902b16	OTU_778	136	477	2	GTCGCTACTACCGATTGAATGGTTTAGTGAGTTCCTCGGATTGTGCTCGTTGAGGGCGGCAACGCTCTCGACGTTGTTACGAGAAGACGAACAAACTTGATCATTTAGAGGAAGTAAAAGTCGTAACAAGGTTTCC
779	316c7752c9f436f40fc2c4c0ee867778	OTU_779	104	477	1	GTCACACCATGGAAGTTTATTGCTCCAGAAGAATTTTAGTCAAATATTGAACATACATTCCAAGGAGTGGTCAGCAACTGGGGTGAAGTCGTAACAAGGTAGCC
780	e53e1b14e425bf08df941b3f87b491c7	OTU_780	124	476	1	GTCGTTGCTACCGATTGGATTGCTCATAGAGAACTCAGGAGTTGCCCCGTTCCTTGTGTTCGGTGGCTTCGAATGTGTTCAATATGAATAATCTAGAGGAAGCAAAAGTCGTAACAAGGTTGCT
781	bc20f540328210549837109051748723	OTU_781	136	476	6	GTCGCTCCTACCGATTGAAGTTTTCGGTGAATTTGCTGGAGGTTCGCTTTGAAACTGGTTCGCCAGCGGATTTGTGTCCCAAAAGCAAATGAATCGATGGCTTTAGAGGAAGGAGAAGTCGTAACAAGGTTTCCGT
782	3d81cef9930fd4a301365a1d25ef2210	OTU_782	131	476	4	GTCGCTACTACCGATTGAATGGCTTAGTGAGCATTAGGGATTGGCCGTCCGCACCGGCAACGGGAGCGGGTGGCCGAGAACTTATGCAAACTTGGTCATTTAGAGGAAGTAAAAGTCGTAACAAGGTTTCT
783	2b75ed11a6b238130cc1b651eef5fa81	OTU_783	131	475	6	CGTCGCACCTACCGATTGAATGGTCCGGTGAAGCCTCGGGATTGTGGCTTGTTTCCTTTATTGGAAGTAGGTCGCGAGAACTTGTCTAAACCTTATCATTTAGAGGAAGGTGAAGTCGTAACAAGGTTTCC
784	48c733f6e3f3198bd48145c6947335a6	OTU_784	106	474	1	GTCACACCATGGGAGTTGGCTTTACCTGAAGCCGGTGCGCTAACCGCAAGGAAGCAGCCGACCACGGTAAGGTCAGCGACTGGGGTGAAGTCGTAACAAGGTAGCC
785	8d4c9623c38a7bca6628a50bfed08834	OTU_785	123	473	2	GTCGCTCCTACCGATTTCGAGTGATTCGGTGAACCTTTTGGACAGCACCTTGCTTCGTGCAGGGAGTTGAAAGTCAAGTAAACCATATCACTTAGAGGAAGGAGAAGTCGTAACAAGGTTTCC
786	88f02197cd608a1df7af980633fa0145	OTU_786	132	473	3	GTCGCTACTACCGATTGAATGGTTTAGCGAGAACCTCGGATCGAGCCCTGGCCGTGCGCAAGCATGGTCGAGGCTTGAGAAGAAGCTCAAGCTTGATCATTTAGAGGAAGTAAAAGTCGTAACAAGGTTTTC
787	d85da5cc56f6fe32d06e4570ce9ef49f	OTU_787	132	473	3	GTCGCTACTACCGATTGAATGGTTTAGCGAGAACCTCGGATCGAGCCTCGTCCGTGCGCAAGCGTGGTAGAGGCTTGAGAAGAAGCTCAAGCTTGATCATTTAGAGGAAGTAAAAGTCGTAACAAGGTTTTC
788	f16965c10de8570f9f351c78c385cfaa	OTU_788	131	471	7	CCGTCGCTCCTACCGATTGAGTGTTCCGGTGAATAATTCGGACTGCAGCAATATTTGGATCCCGAACATTGCAGTGGAAAGTTTGGTGAACCTTAACACTTAGAGGAAGGAGAAGTCGTAACAAGGTTTCC
789	5e4b3dfdf57b030806f62bf1c12827dc	OTU_789	131	470	15	CGTCGCACCTACCGATTGAATGGTTCGGTGAAGATCTCGGACTTCGATATTTGTTCTTCATTGAACTTATATAGTGGGAAGTTATCTGAACCTCATCATTTAGAGGAAGGTGAAGTCGTAACAAGGTTTCC
790	7f82d4d401abd46aa9c1d786a116efce	OTU_790	128	469	8	GTCGCACCTACCGATTGAGCGTTCCGGTGAAACCTCGGGATTGTAGTTGATTCCTTTACTGGAATCTCCCGCGAGAACTTGTTTGAACCTTATCGCTTAGAGGAAGGTGAAGTCGTAACAAGGTTTCC
791	7fa2e3fe1340f006e9fa5c4f13609a7b	OTU_791	107	469	11	GTCACACCATGGGAGTTGGTTTTACCCGAAGACGGTATCCTAACCTTTTAGGAGGGAGCCGGCCACGGTAGGGTCAGCGACTGGGGTGAAGTCGTAACAAGGTAGCC
792	d7f82914f3f9c09de9d2e050291bdbcc	OTU_792	136	468	7	GTCGCACCTACCGATTGAATGGTCCGGTGAATTCTTCGGACTGCGGCTTTGACTCGATTTCGGTCGAGGCGTTGCTGCGGGAAGTTGATTAAACCTTGCCATTTAGAGGAAGGTGAAGTCGTAACAAGGTAGCCGT
793	adf0dd6312623acac5cabe5be1cabcd2	OTU_793	133	468	1	GTCGCACCTACCGATTGAATGGTCCGGTGAATCTTTAGGACTGTGGCTGAGGCCTTGCCTTGTGCGGGTCTGGCCGTGGGAATTTAGTTAAACCTTACCATTTAGAGGAAGGTGAAGTCGTAACAAGGTTTCC
794	ab0b18136356566c32f0077299c35ea2	OTU_794	106	467	5	GTCACACCATGGAAGTGGATTGTACCAGAAGTAGTTAGCTTAACCCTCGGGATGGCAATTACCACGGTGTGGTTCATGACTGGGGTGAAGTCGTAACAAGGTAGCC
795	8ed59c6c8726d9bec7d2fcedcc7dd550	OTU_795	131	466	4	CCGTCGCTCCTACCGATTGAGTGATCCGGTGAATAATTCGGACTGCAGCCTGTCTTGGATCCCGAGCATGGCAGCGGGAAGTTTAGTGAACCTTATCACTTAGAGGAAGGAGAAGTCGTAACAAGGTTTCC
796	b3c6e25e741cb8813b9ece46ebed7966	OTU_796	126	466	13	GTCGCACCTACCGATTGAATGGTCCGGTGAACTGTCAGGATCGAAGGAGAAGTTTCACGACGACTCTATCGAGAATTTCCGTAAACCTTACCATTTAGAGGAAGGTGAAGTCGTAACAAGGTTTCC
797	685dec4051253cd1e3f528861989e482	OTU_797	133	466	11	GTCGCTACTACCGATTGGATGGTTTAGTGAGATCCTCGGATTGGTCCCGGCGCGGCTTCTGGTTGCGCCGGAGTGCCGAAAAGAATGTCGAACTTGATCATCTAGAGGAAGTAAAAGTCGTAACAAGGTTTCC
798	78b203b33c54d14db0d09ec5b9c094bd	OTU_798	106	465	11	GTCACACCATGGGAGTTGATTTCACCCGAAATTGGGAAGCTAACCTTCGGGAGGCTACCACTTACGGTGGAATTAGCGACTGGGGTGAAGTCGTAACAAGGTAACC
799	05016fed723a5ca5913beb300c4761cd	OTU_799	132	465	3	GTCGCTACTACCGATTGAACGTTTTAGTGAGGTATTTGGACTGGACCTTCGGGGGCTTCTGCCACCGTTGCTGTTCGGGAAGACTCCCAAACTTGAGCGTTTAGAGGAAGTAAAAGTCGTAACAAGGTTTCC
800	cff5cf86e2fa7947f5ea33553fc84f43	OTU_800	104	465	5	GTCACACCATGGGAGTTGGGTTTACCCGAAGGCCGTGCGCTAACTTTTGAGGCAGCGGACCACGGTGAGCTCAGCGACTGGGGTGAAGTCGTAACAAGGTAGCC
801	761c501e9007da443324629fca1456d5	OTU_801	132	465	5	GTCGCACCTACCGATTGAATGATTCGGTGAAGATCTCGGACTGTGTCGCTGTACCCTTCACTGGGCATAGTGACGCGGGAAGTTATTTAAACCTCATCATTTAGAGGAAGGTGAAGTCGTAACAAGGTTTCC
802	d76ea8f1a21ba8539c9cee747e141e7c	OTU_802	132	464	8	GTCGCTACTACCGATTGAATGGTTTAGTGAGGTCTCCTGATTGGCGCTCTGCAGCTGGCAACAGCAGTGGGATGCTGAAAAGTTGATCAAACTTGATCATTTAGAGGAAGTAAAAGTCGTAACAAGGTTTCC
803	ba6e0684a4b2bdc89e7638533c482606	OTU_803	106	464	6	GTCACATCACGAAAGTTAGTTGCTCTTGAAGTCGCTGAGCTAACCGCAAGGAGGCAGGTGCCGACAGAGTGGCTGGCGATTGGGGTGAAGTCGTAACAAGGTAGCT
804	15ed48223dacd7ad40cc6e06b348a915	OTU_804	123	464	4	GTCGCTCCTACTGATTGGGTGATCCGGTGAGCTGTTCGGCCATAGCAATGTTTCTTGAGCAGGGCAATGAATGTTTCGCAAACCTTGCCACTTAGAGGAAGGAGAAGTCGTAACAAGGTTTCT
805	eb368ac1ac65f13a8dcfd1dd63738989	OTU_805	131	463	8	CGTCGCACCTACCGATTGAATGGTCCGGTGAAGCCTCGGGATTGTGGCTCGTTCCCTTTATTGGGAGTTTGTCGCGAGAACTTGTCTAAACCTTATCATTTAGAGGAAGGTGAAGTCGTAACAAGGTTTCC
806	1e254e207ebde34801f0c59facee5c08	OTU_806	185	462	13	GTCGCTACTACCGATTGAATGATTTAGTGAGGACTTCGGACTGTCGCTCTTGGATGCCGGGTCCACCGCCGCCGTTGTTGGCCTTTCGGGGCCCGCGGTTGGCAGGGCTTTTCGGCGCCTCGAGCTGACGGAAAGATGTCCAAACTTGATCATTTAGAGGAAGTAAAAGTCGTAACAAGGTTTCC
807	557a1dee360f09ccd63a247e6c1886e5	OTU_807	131	462	10	CCGTCGCTCCTACCGATTGAGTGATCCGGTGAATAATTTGGACTGCAGCAACGCTTGGATCCCAAATGTTGCAGTGGAAAGTTTAGTGAACCTTATCACTTAGAGGAAGGAGAAGTCGTAACAAGGTTTCC
808	cd5d02a39bcdb032e2ae5a310c658893	OTU_808	107	462	1	GTCACACTCTGGAAGTTGATCTCAATTGAAGCTTATTACCTAACCTTTTAGGAGGGTGTATGTGAGATTGGGGCTAGCGACTGGAGTGAAGTCGTAACAAGGTAGCT
809	b75a92155ff65f5a05a31148dba22e9f	OTU_809	131	462	5	CGTCGCACCTACCGATTGAATGTTTCGGTGAAACTTTCGGACTACGGCTTTTGGACCCTCGGGTCCTTTGGCCGTGGAAAGTTATTTAAACCTCAACATTTAGAGGAAGGTGAAGTCGTAACAAGGTTTCC
810	fbc902524ff076d7b32421e2ccd00245	OTU_810	138	461	1	GTCGCTACTACCGATTGGGCGATTTAGTGAGCGCCTCGGATTGGACCCGGAACGATCGGCAACGACCGTACCGCTGTGTGCCGAAAAGACGCGCAAACTTTATCGCCTAGAGGAAGTAAAAGTCGTAACAAGGTTTCC
811	9e437720ad48016315fb0f688cb8de53	OTU_811	131	461	9	GTCGCTACTACCGATTGAATGGCTTAGTGAGCTCTCTGGACTGTTGCACTCCGTTGGTAACTTCGGTGAGCATACGGGAAGGAGATCAAACTTGATCATTTAGAGGAAGTAAAAGTCGTAACAAGGTTTCC
812	51ed32e612f81675d9835478452e8790	OTU_812	131	459	2	CGTCGCTCCTACCGATTGAGTGGTCCGGTGAGGCTTTGGGAGGGCTGGATGGATTGTGTTTCACAGACTATTCGGTCTGAACTAGTCAAACCTTACTACTTAGAGGAAGGAGAAGTCGTAACAAGGTTTCC
813	f1134664f6f410bb346e51d9f6f5b750	OTU_813	121	459	1	GTCGCTGCTACCGATTGAGTGATCCGGTAAACCTTCTGGACTGCCGATGGTTTCGAGCCATTGGCGGGAAGTTAAGTAAACCTTATCACTTAGAGGAAGCAGAAGTCGTAACAAGGTATCT
814	a616748960e359a47004374e310a4821	OTU_814	131	459	7	CCGTCGCTCCTACCGATTGAGTGATCCGGTGAATAATTCGGACTGCAGCAGTGTTTAGTTCCTGAGCGTTGCCGTGGAAAGTTTAGTGAACCTTATCACTTAGAGGAAGGAGAAGTCGTAACAAGGTTTCC
815	5ebbd4e3f4f719f71f2f9e7840070b07	OTU_815	135	459	2	GTCGCTCTTACCGATGGACTTCTCTGTGAGTTTGAGGGACTGGCGCTCTTAATATATTTTTTTATATTAATTGTGCTATGGAAACTTAAACGAACAGTGTGGTCTAAAGGAAAGAGAAGTCGTAACAAGGCATCT
816	79e5b4090ec2a07cb4751e79f6a08d70	OTU_816	127	458	4	GTCGCTCCTACCGATTGAATGTTCCGGTGAATACTTCGGACTGCGAAGTCTGCAGTTTCTGCGTTCTTTGCGGAAAGTTGAATAAACCTTAACATTTAGAGGAAGGAGAAGTCGTAACAAGGTTTCC
817	6eaf04e31ac72778b3bb5f74107d09c5	OTU_817	131	457	7	CCGTCGCTCCTACCGATTGAGCAATCCGGTGAATATTTCGGACCGAGACCTGTCGGGGCAACTCGTTCAGGATTTGGAAAGTCAAGTTAACCTTATTGCTTAGAGGAAGGAGAAGTCGTAACAAGGTTTCC
818	5699422a79ee45ef41e1b90faf2b723f	OTU_818	131	457	1	GTCGCTACTACTGATTGGACGTTTAAGCAAGATTTTTGAACACTGACAGTTGATGCTTCGGTTGAAAGCAGTGGGAAGAAGAAGATCGAGCTTATTTGTCTAGAGGAAGTAAAAGTCGTAACAAGGTTTCC
819	da0b1b902abfc299d85e38f01ad56043	OTU_819	131	455	1	GTCGCACCTACCGATGAATGGTCCGGTGAAATTTTCGGACTGCGACAATGACCCATTCATTTGGGACTACGTCGTGGGAAGTTATTTAAACCTTACCATTTAGAGGAAGGTGAAGTCGTAACAAGGTTTCC
820	5221387c18ed44b8c3726caa324bc254	OTU_820	132	455	2	GTCGCACCTACCGATTGAATGGTCCGGTGAAATCTTCGGATCTGAGAGATATTGGATTAATTTCTGACGTCTTTTAGAAAAGTTGCTTAAACCTTATCATTTAGAGGAAGGTGAAGTCGTAACAAGGTTTCC
821	2e1e5075d9c79b3696364c49faabcd00	OTU_821	133	455	8	GTCGCTACTACCGATTGGGTGTTTTAGCAAGGTGGGGGGAGAGAGCCCGGTGTGATGCTCTGCTGAGCACCGGGCATTCAAACCCCATCAAGCTTGAACATCTAGAGGAAGTAAAAGTCGTAACAAGGTTTCT
822	4437e0d955d7b5aede75662605230772	OTU_822	131	455	12	CGTCGCTCCTACCGATTGGATGATCCGATGAGTTATTCAGAGAGGGTTTCCGAAGGCGCAAGTTGGAGGATACCTTCAAAGTTTGTCAAATCTGACCATCTAGAGGAAGGAGAAGTCGTAACAAGGTTTCC
823	3feb2b6055e61176047e55ef242626c3	OTU_823	131	455	12	CGTCGCACCTACCGATTGAGTGTTCCGGTGAAGCCTCGGGATTGTAGTTGGCTTCCTTTATTGGATGCTAACAGCGAGAACTTGTCTAAACCTTATCACTTAGAGGAAGGTGAAGTCGTAACAAGGTTTCC
824	01480e071ce73e8913e0cbb8e332753d	OTU_824	132	455	8	GTCGCTCCTACCGATTGAATGTGTTGGTGAGGAGTTCGGATTGGCAGTTAGTGGTGGTTCGCCACTGCTTGCAGCTGAGAAGTCCTCCAAACCGCCCCATTTAGAGGAAGGAGAAGTCGTAACAAGGTTTCC
825	0ce2a504a63ad8093318f3ee6d70078b	OTU_825	128	453	2	GTCGCTCCTACCGATTGAGTGATCCGGTGAATAATTCGGACGGATCTTTGGGGTAGTTCTATCCCTTGGATCTGAAAGTCTAGTGAACCTTATCACTTAGAGGAAGGAGAAGTCGTAACAAGGTTTCC
826	11e14bb3d1772161ec2c5617695d9e37	OTU_826	132	453	14	GTCGCTCCTACCGATTGAGTGTTCCGTTGAGAATCCCTAAACTGCTTTACTATGCTCTACAATCTTATGTATAGTGGTAACGTTGTACAAATCTTGTCATTTAGAGGAAGGAGAAGTCGTAACAAGGTTTCC
827	32610d1c7840a1e596ef90c4e0826506	OTU_827	132	452	6	GTCGCACCTACCGATTGAATGATTCGGTGAAAATTTCGGACTGTGTCGCTGTACCCTTCATTGGGCATAGTGACGCGGGAAGTTATTTAAACCTCATCATTTAGAGGAAGGTGAAGTCGTAACAAGGTTTCC
828	970f9159e2e7c71e7679bce25611a343	OTU_828	131	452	5	GTCGCTCCTACCGATTGAGTGGTCCGGTGAGGCTTTGGGATCTGAGCGGAAAGAGCGTTTCGCTCGTTCTGCCCGGAAAACTCAGTCGAACCTTATCATTTAGAGGAAGGAGAAGTCGTAACAAGGTTTCC
829	5c5d7f5f3192af94f0e6cd4f473fd943	OTU_829	131	451	9	CGTCGCACCTACCGATTGAATGGTCCGGTGAAGACTCGGGATTGTAGCGTGGCTCCTTTATTGGTGCCTCGCCGCGAGAACTTGTCTAAACCTTATCATTTAGAGGAAGGTGAAGTCGTAACAAGGTTTCC
830	4fc9679ba774559363a5c1642d49650b	OTU_830	128	451	3	GTCGCTCCTACCGATTGGGTGATCCGGTGAATGACTCGGACTTCGATTCTCCTAGCGTGCTAGGCGTATTGGAGGAAGTTTTGTGAACCTTATCACTTGGAGGAAGGAGAAGTCGTAACAAGGTTTCC
831	e99a532556b9bed3fedd9e750f07303c	OTU_831	106	450	1	GTCACACCATGGGAGTGTATTGCACCAGAAGTGGGTAGTCTAACCTTCGGGAAGGCGCTTACCACGGTGTGATCCATGACTGGGGTGAAGTCGTAACAAGGTAGCC
832	9194ddc42b4f0d92dcbb5a87324849f5	OTU_832	157	449	3	GTCGCTACTACCGATTGAATGGTTTAGTGAGACCCTCGGATTTGCCTCAGCATGGGGCTGTGTTGGTGGGGAAACTTGCCTCATAGCTCCGCTGTAGTGCAGAGAAGACGGTCGAACTTGATCATTTAGAGGAAGTAAAAGTCGTAACAAGGTTTCC
833	d6745eb1db4d83710b0d7038f911b4a7	OTU_833	131	448	7	CGTCGCTCCTACCGATTGAGTGATCCGGTGAATAATTCGGACCAGGATTCGCATGAGTTCGCTCGCGCAAATCCCGGAAAGTCTAGTGAGCCTTATCACTTAGAGGAAGGAGAAGTCGTAACAAGGTTTCC
834	26a1985af6705c82f82e688dc929e12d	OTU_834	131	448	2	GTCGCTACTACCGATTGAACGGCTTAGTGAGGTATTTGGACTGGGCCTCGCGCAGCTCGCGCTGCGCGTGCGCCTGGGAAGACTCCCAAACTTGGTCGTTTAGAGGAAGTAAAAGTCGTAACAAGGTTTCC
835	f27bc20dc6b05100925208c25299877d	OTU_835	136	448	3	GTCGCTACTACCGATTGAACGATTTAGTGAGAACATCGGACCGTTCCTACTTGGCTCCTCTGGAATTAGGTAGGTGACTAGAAGATGTTCAAACTTGACCGTTTAGAGGAAGTAAAAGTCGTAACAAGGTTTTCGT
836	4e387019795e69eba350474359a56a5e	OTU_836	116	447	9	GTCGTTGTTTCCGATGATGGTGCAATACAGGTGATCGGATAGATGGGTGTCTCATCCGTCTCGAAGTTCACCGATATTTCTTCAATAGAGGAAGCAAAAGTCGTAACAAGGTAGCT
837	0c472178f9148f82ef2cf77b5286f86c	OTU_837	136	446	10	GTCGCTACTACCGATTGAATGGTTTAGTGAGATCTTCGGATTGGCGCCATCGTGGCTTTACGGCCGTGACGGACTGCCGAAAAGTTGCTCAAACTTGATCATTTAGAGGAAGTAAAAGTCGTAACAAGGTTTCCGT
838	9707327df997da3e822973c88e658733	OTU_838	106	446	3	GTCACATCACGAAAGCCGGGTGCACTAGAAGTCGTTGACCCAACCTTCGGGAGGGAGACGCCGACGGTGTGCTTGGTGATTGGGGTGAAGTCGTAACAAGGTAGCT
839	21c69d90daace173058741cc9c65424b	OTU_839	136	446	2	GTCGCTACTACCGATTGGACGTATTATCAAGGCCTCTGGATCGGCTTCAGTATCGGCGGCAACGCCGAAGCTGTGAGCTGAGAAGCAGGTCGCGATTGTATGTCTAGAGGAAGTAAAAGTCGTAACAAGGTTTCCG
840	b99e5ccfe43eecf249c3344b79496bd4	OTU_840	113	445	5	ATCACGCTCGAAAAGTTCTTTGAATTAAAAATAAATTATATCGAGTGTATTACATATTGATGTTTTATTTTAGATTTAGGGGGTGATTGGAGTGAAGTTGACACAAGGTACTG
841	b1e85e3d2b948a137df086f7316d116e	OTU_841	116	445	10	GTCGTTGTTTCCGATGATGGTGCAATACAGGTGATCGGATAGATGGGTGTCTCACCTGTCTCGAAGTTCACCGATATTTCTTCAATAGAGGAAGCAAAAGTCGTAACAAGGTAGCT
842	736156097ab93da6c62f816b4963b550	OTU_842	131	445	1	CCGTCGCTCCTACCGATTGAGTGATCCGGTGAATAATTTGGACTGCAGCAATGCTTGGATCCCGAATGTTGCAGTGGAAAGTTTAGTGAACCTTATCACTTAGAGGAAGGAGAAGTCGTAACAAGGTTTCC
843	6ff1139263fd2685473555a2aa5c265f	OTU_843	132	444	1	GTCGCTACTACCGATTGAATGGCTCAGTGAGGCGTTCGGACTGGCTCGAGGAGGTTGGCAACGACCACCCTGGGCCGGAAAGTTCGTCAAACTCGGTCATTTAGAGGAAGTAAAAGTCGTAACAAGGTTTCC
844	d399b6ea0567b0721408bf3d4af80a5d	OTU_844	131	444	2	CGTCGCACCTACCGATTGAATGGTCCGGTGAAGCCTCGGGATTGTGGTGAGTTCCCTTTATTGGGAGTTTACCACGAGAACTTGTCTAAACCTTATCATTTAGAGGAAGGTGAAGTCGTAACAAGGTTTCC
845	8b99b60559beb02b351888ead9598519	OTU_845	131	443	17	CGTCGCACCTACCGATTGAACCATACGGTGAGGTCCTCGGATTTTTTAAGCCGACCTTCATTGGGAGGCTTGAAGGAGAAGTTGCCCAAACCTCGTGGTTTAGAGGAAGGTGAAGTCGTAACAAGGTTTCC
846	095ebe4b265dabc34d87479243d29174	OTU_846	131	442	7	CCGTCGCTCCTACCGATTGAGTGATCCGGTGAATAATTCGGACTGCTGCAGTGTTCAGTTCCTGAACGTTGCGGCGGAAAGTTTAGTGAACCTTATCACTTAGAGGAAGGAGAAGTCGTAACAAGGTTTCC
847	d9f3566c966c06bbdf8dfbd3539ca7e4	OTU_847	131	442	1	CCGTCGCTCCTACCGATTGAGTGGTCCGGTGAATAACTCGGATCGCGGTATTAGGGTTTCGGCCACTGATATCGCGAGAAGTTTAATGAACCTTATCACTTAGAGGAAGGAGAAGTCGTAACAAGGTTTCC
848	d283c92683dc4b23f2b5b420fffc3d2d	OTU_848	106	440	3	GTCACACCATGGGAGTTGGTTTTACCCGACGCCGGTGGGCTAACCTTTTGGAGGCAGCCGACCACGGTAGAGTCAGCGACTGGGGTGAAGTCGTAACAAGGTAGCC
849	98a5a74afc8c8f51f81c1f3cb381dc1e	OTU_849	132	438	1	GTCGCTTCTACCGATTGAACGGTCCGGTGAAGACTCAGGAGATGCGTACGTGTTTGGTTTCCATTCGCGTTGCGTATTGAATTTGTCTAAACCTTACCGTTTAGAGGAAGAAGAAGTCGTAACAAGGTTTCC
850	a3b8aabeafec30c3501d86cdb95c1a65	OTU_850	131	438	10	CCGTCGCACCTACCGATTGAATGGTCCGGTGAGATCCTCGGACTGCGACGAATCTCTGGCAACAGAGTTAATTGCGGAAAGTTGATCAAACCTTACCATTTAGAGGAAGGTGAAGTCGTAACAAGGTTTCC
851	b0eafb9192c3c7ccaf453de167c2f9a9	OTU_851	131	438	3	CGTCGCTACTACCGATTGAACGTTTTAGTGAGGCATTTGGATTGGACGTCGAGAGGTTCGCGCCCCTCGGCTGCCGAAAAGACTTCCAAACTTGAGCGTTTAGAGGAAGTAAAAGTCGTAACAAGGTTTCC
852	96ba4c7ae236906870f016a7e6fe8612	OTU_852	133	437	10	GTCGCTCCTACCGATTGAATGATCCGGTGAGGCCCCCGGACTGTGGCAACGGCTTTGGTTCGCCAAACTGATGCCGCGGGAAGCTGTCCAAACCTTATCATTTAGAGGAAGGAGAAGTCGTAACAAGGTTTCC
853	ec5a36cc420c786b2ddcbe68665f2723	OTU_853	132	437	2	GTCGCACCTACCGATTGAATGGTCCGGTGAAATTTTCGGACCGCGTCGATGTCACCTTTATTGGAGACGCTGCCGTGGGAAGTTACTTAAACCTTACCATTTAGAGGAAGGTGAAGTCGTAACAAGGTTTCC
854	fa2e71331b3585ca81c55650a978999c	OTU_854	132	437	1	GTCGCTACTACCGATTGAATGGCTTAGTGAGGCCTCCGGATTGGCGTCGAAAAGCCGGCAACGGCTATTTGATGCTGAGAAGCTGGTCAAACTTGGTCATTTAGAGGAAGTAAAAGTCGTAACAAGGTTTCC
855	07ffed3268d19f99f07cd21efe98b3a3	OTU_855	126	435	5	GTCGCTACTACCGATTGAATGTCTTAGTGAGTGTTTTGGATGTTTCTGGTTCGTTTTTGCGGGCCGGAAGCAGAAGGAAAGCAAACTTGGTCATTTAGAGGAAGTAAAAGTCGTAACAAGGTTTTC
856	d98483548bb5a04470e1760fd2c0be72	OTU_856	132	435	12	GTCGCACCTACCGATTGAATGGTTCGGTGAAAATTCTGGACTGCAACCTTGCTTTCTTCATTGAAGGCGGGGCCGCGGAAAGTTATTTAAACCTCATCATTTAGAGGAAGGTGAAGTCGTAACAAGGTTTCC
857	426d688bd731d8d77ef673b70ee74d1e	OTU_857	106	434	11	GTCACATCACGAAAGTCGGTTGCACCTGAAAACGGTGAGCTAACCTCGCGGAGGCAGCTGTTTACGGTGTGATCGGTGATTGGGGTGAAGTCGTAACAAGGTAGCT
858	73b2a4d6afeafe590a46a378e1635fbc	OTU_858	108	434	6	GTCACACCATGGGAGTTGGTTTTACCCGAAGGTAGTGCGCTAACCCGCAAGGGAGGCAGCTAACCACGGTAGGGTCAGCGACTGGGGTGAAGTCGTAACAAGGTAGCC
859	4a955fcfb9dd9b42a3d11fd8425b41ef	OTU_859	128	433	7	GTCGCTCCTACCGATTGAATGATCCGGTGAATACTTCGGACTGCGTAGTTTTGCAGCAATGCTCTATTATGCGGGAAGTTGAATAAACCTTATCATTTAGAGGAAGGAGAAGTCGTAACAAGGTTTCC
860	43e02a5595a1d08a55b8f007dc89affc	OTU_860	104	432	9	GTCACACCATGGGAGTGGACTGCACCAGAAGTGGTTAGCCTAACGCAAGAGGGCGATCACCACGGTGTGGTTCATGACTGGGGTGAAGTCGTAACAAGGTAGCC
861	a2f8a3bbee9452ebd5c7f95ce29c1734	OTU_861	131	430	8	CGTCGCTGCCTCCGATTGAGTGATCCGGTGAATAATTCGGACCGATAGCTCGTTTGGTTCGCCGAACTTGTTGTTGGAAAGTCTAGTAAACCTTATCACTTAGAGGAAGCAAAAGTCGTAACAAGGTTTCC
862	32aafbcc01ce350bfdda67036b32d716	OTU_862	132	430	3	GTCGCTACTACCGATTGAACGTTTTAGTGAGGTATTTGGACCGGGCCGTCGGTCGCTCGCGCGTCCGCCGTTGCCTGGGAAGACTCCCGAACTTGAGCGTTTAGAGGAAGTAAAAGTCGTAACAAGGTTTCC
863	f3bbe09c395f7ec07c7983e6f3f23d8d	OTU_863	131	430	2	CCGTCGCTCCTACCGATTGGATGATTCGGTAAGCTTTTGGGATTGATTTCGTCTCAACCATGTGTTGTACGATTTGACAACTTAATCAAACCTAATCATCTAGAGGAAGGAGAAGTCGTAACAAGGTTTCC
864	10a36a6e1a781de5ce71cee5086dc018	OTU_864	145	429	4	GTCGCTCCTACCGATGTTTGGTCCGGTGAAATCTTAAGATTTGCGGCATACACTTGTTTTTGCTCTTTTGTGAGAATGAGTTTGCTGTGGAGAATTTGAGTAAACCTTGCCAAATAGAGGAAGGAGAAGTCGTAACAAGGTATTC
865	c1b0166f82c3a9bafe5ffeea4f6b5668	OTU_865	132	428	2	GTCGCTCCTACCGATTGAGTGGTCCGGTGAGGCCTTGGGAGGGCTAAGCAAACTGTGTTTTCATGGATTGCCTGGCCCGAACCTGGTCAAACCTTATCACTTAGAGGAAGGAGAAGTCGTAACAAGGTTTCC
866	0f95f97141524b2c3f40a162a0af8b49	OTU_866	132	427	5	GTCGCTACTACCGATTGAACGTTTTAGTGAGGCATTTGGACTGGACCTGGCCGGGTTCACGCCTGGCTTGTTGTCCGGGAAGACTTCCAAACTTGAGCGTTTAGAGGAAGTAAAAGTCGTAACAAGGTTTCC
867	83cb09c2fbe8b5ae2b237e6790bac0ed	OTU_867	131	427	2	GTCGCTACTACCGATTGAATGGCTTAGTGAGACCTCCGGATTGATAGGGAAAGGTTGTTTACAACCTTCCTTGTCGAGAAGCTGGTCAAACTTGGTCATTTAGAGGAAGTAAAAGTCGTAACAAGGTTTCC
868	8b5708ed48130089b4a111399bca6fba	OTU_868	106	426	1	GTCACACTATGGAAGTTGGTTTTACCTTAAGGCAAGTTATTAACCCTCGGGGAATGCTTGACCACGGTAAAATTAGCGACTGGGGTGAAGTCGTAACAAGGTAGCC
869	28bfa004c5caddd77414e32bc2b9fe6b	OTU_869	132	425	21	GTCGCTCCTACCGATTGAATGATCCGATGAATATCATGGATTGAGGATGTAAGCAGGTTCGCCTGTCTTCATCTTCGAGAAGTGAAGTAAATCTTATCATTTAGAGGAAGGAGAAGTCGTAACAAGGTTTCC
870	94fc78a056c96b27a259af9ef2b160b5	OTU_870	136	425	11	GTCGCTCCTACCGATTGAATGGTCCGGTGAGGTTCTCGGATCACGATTTCGACACTGGTTCGCTAGTGACGATTTCGAGAGAAGTTACACAAACCTTACCATTTAGAGGAAGGAGAAGTCGTAACAAGGTTTCCGT
871	c98bf5232ca52ecd42660fb9831f2fd2	OTU_871	132	425	2	GTCGCTCCTACCGATTGGATTGGCTGGTGAAGCGTTCGGATTGTGGGTTCGGAGCGGTTCGCCGTTCTGGGCTTGCGAGAAGTTCGTTAAACCCTCCTATCTAGAGGAAGGAGAAGTCGTAACAAGGTTTCC
872	30c89e58a8eba35b0a5beb87ac515bfe	OTU_872	125	425	1	GTCGCACCTACCGATTGAATGATTCGGTGAAATCTCGGGACCGTGGATGGTCGCTTCGGCGCCTTCCGCGGGAACTTGCTTAAACCTCATCATTTAGAGGAAGGTGAAGTCGTAACAAGGTTTCC
873	f420392d116e4ac5bec0be618dcc9435	OTU_873	116	425	9	GTCGCTCCTACCGATTGGGTGAGCCGATGAAACTGTCGGATGTAGACTATTCATAGTCCGCAGAAGATATTTGAATCGTAGCGCTTAGAGGAAGGAGAAGTCGTAACAAGGTTTTC
874	1e9fce1400af091029190b289e1ed6aa	OTU_874	131	424	2	CGTCGCTCCTACCGATTGAGTGATCCGGTGAATAATTCGGACCAGGAATCGCATGAGTTCGCTCACGCAATTCTCGGAAAGTCTAGTGAGCCTTATCACTTAGAGGAAGGAGAAGTCGTAACAAGGTTTCC
875	e089b54c7fb2dd91905bcae979e66238	OTU_875	131	424	1	GTCGCTACTACCGATTGAATGGTTTAGCAAGGTCTTCGGATTGGCGCCTGACAGTCTAGCACTGTCTTGGTTGCTGAGAAGATGATCAAACTTGATCATTTAGAGGAAGTAAAAGTCGTAACAAGGTTTCC
876	98e765e38db35dac092816cac30f13c1	OTU_876	131	424	9	CGTCGCTACTACCGATTGAATGGTTTAGTGAGATCTCGGGATTGGAGACGTTGCGCCGCAAGGCACATCGTCCTCGAGAACTTGATCAAACTTGATCATTTAGAGGAAGTAAAAGTCGTAACAAGGTTTCC
877	8769a367e74d9798cb04b99034daba6a	OTU_877	136	424	4	GTCGCACCTACCGATTGAATGATCCGGTGAAATCTTTGGATTATATTATTTATAATACTTTCGGGTATTAAAATTATGTAAAAAGTGGATTAAACCTTATCATTTAGAGGAAGGTGAAGTCGTAACAAGGTTTCCG
878	6fddc5d44d6c51bfe559571b3601241b	OTU_878	131	423	4	CGTCGCACCTACCGATTGAATGGTCCGGTGAAGCCTCGAGATTGTGGCCAGTTCCCTTTATTGGGAGTTGGTTGTGAGAACTTGTCTAAACCTTATCATTTAGAGGAAGGTGAAGTCGTAACAAGGTTTCC
879	09237267fed64ae7471fa7ed67305999	OTU_879	131	423	4	CCGTCGTTGCTACCGATGATGTGGAGATAGAGACGTTGGGAGAGGCTGTCTGAAACGTTCGCGTTTATTTCAGCTTCGAACTTCTCCGATATCTCCATATTAGAGGAAGCAAAAGTCGTAACAAGGTAGCT
880	1a506c3a0748fe272226f2abaae3452a	OTU_880	131	422	13	CGTCGCTTCTACCGATTGAATGATTCGGTGAATACTTTGGACCGTCGTTTTACAGAGTTCGCTCCGTTTTACGATGGAAAATTGGGTAAACCTCATCATTTAGAGGAAGAAGAAGTCGTAACAAGGTTTCC
881	6f212c0fb9f7c95aa5f95ff1c9f86c38	OTU_881	136	422	3	GTCGCACCTACCGATTGAATGGTCCGGTGAAATTTTCGGACCATAGCAATGTCACCGAATCTCGGAGATACTGCATGTGGGAAGTTAATTAAACCTTACCATTTAGAGGAAGGTGAAGTCGTAACAAGGTTTCCGT
882	5624f73a241e8df8999f2f485478e8a0	OTU_882	106	420	13	GTCAAGCCACGGAAGTTGACAGTACCTGAAGTCGTGTACCCAACCTTCGGGAGGGAAGCGCCCACGGTAAGGTCGATGACTGGGACTAAGTCGTAACAAGGTAGCC
883	5a99cb0f42134f4d632ae60b0f8f3ffa	OTU_883	131	420	15	CCGTCGCTCCTACCGATTGAGTGTTCCGGTGAATAATTCGGACTGCAGCTTCGTGGGGATCCCTCATGTTGCAGCGGAAAGTTTAGTGAACCTTAACACTTAGAGGAAGGAGAAGTCGTAACAAGGTTTCC
884	006f6629c741b204679fd05fcbfb5746	OTU_884	131	419	4	CGTCGCTCCTACCGATTGAGTGGTCCGGTGAGGCCGTGGGAGGGCTGGACCATCTGTGTTTCACAGTAATCTGGCCCAAACCTGGTCAAACCTTATCACTTAGAGGAAGGAGAAGTCGTAACAAGGTTTCC
885	409d6eb1619474116a96c3cca3b94b46	OTU_885	106	418	8	GTCACACCATGGGAGTTGGTTTTACCCGAAGCCGGTGCGCTAACCGCAAGGAGGCAGCCGACCACGGTAAGGTCAGCGACTGGGGTGAAGTCGTAACAAGGTAGCC
886	4bdd337dc496d45cfd1f62f0cd51b8d1	OTU_886	132	418	12	GTCGCACCTACCGATTGAATGGTCCGGTGAAATCTTCGGACCGTGACTTTGATTTGTTTACTCAAAACGCTGTTACGGGAAGTTGATTAAACCTTACCATTTAGAGGAAGGTGAAGTCGTAACAAGGTTTCC
887	95a345caa20a7fa5085ae0ca5eb8b163	OTU_887	131	418	5	CGTCGCTCCTACCGATTGAGTGGTCCGGTGAATAATTTGGACCGGTGCCTTATTCGGTTCGCCGAATTCGGTGCTGGAAAATCTAGTGAACCTTATCACTTAGAGGAAGGAGAAGTCGTAACAAGGTTTCC
888	3020838afea8f18776a42dc9f6800a4b	OTU_888	131	417	1	CCGTCGCTCCTACCGATTGAGTGATCCGGTGAATAATTCGGACTGCAGCAATGTTCAGCTCCTGAACGTTGCAGTGGAAAGTTTAGTGAACCTTATCACTTAGAGGAAGGAGAAGTCGTAACAAGGTTTCC
889	ef64a309415d41cf4c256cecafc66ab4	OTU_889	107	415	6	GTCAAGTGATGGGAGTTGGGAGTACCCGAAGTCGGATTGCTAACTTTTTAAGAGGCGTCTGCCGACGGTAAGCTCGATGACTGGCACTAAGTCGTAACAAGGTAGCC
890	5791d5123af2a9fd363e55ba5be3cbb2	OTU_890	133	415	1	GTCGCTACTACCGATTGAATGGTTTAGTGAGCTGCATGGATTGATAATTAGTCTTGTTTCGGCAAGTACTTATTATTAAGAAGTGAGGCAAATTTGATCATTTAGAGGAAGTAAAAGTCGTAACAAGGTTTCC
891	42366fc5a023abc122aa44ef85188ff2	OTU_891	104	415	11	GTCACACCATGGGAGTTGGTTTTACCCGAAGCCGGTGCGCTAACTACGGAGGCAGCCGACCACGGTAAGGTCAGCGACTGGGGTGAAGTCGTAACAAGGTAGCC
892	90b8cc7b39e8bff01e24427a7c3b06fc	OTU_892	131	415	7	CGTCGCACCTACCGATTGAATGTTTCGGTGAAACTTTCGGACCGTGATCATTGGACCCTCGGGTCTTTTGGTTGTGGAAAGTTATTTAAACCTCAACATTTAGAGGAAGGTGAAGTCGTAACAAGGTTTCC
893	2234135d2f5e62ccd76354da66cf1d0f	OTU_893	136	415	1	GTCGCTCCTACCGATGAATGTTCCGATGAAATTTTCGGAGAGTGCCTGTGAAGCAGGCTCCGCCTGTCGAACGGGAAGCTCAAAGTCACTTAAATCTGAACATTTCGAGGAAGGAGAAGTCGTAACAAGGTTTCCG
894	99332cf57677172c3ce2c4f76563932d	OTU_894	131	415	1	CCGTCGCACCTACCGATTGAATGATTCGGTGAAACCTCCGGACCTGCGCGGGAGGCCTTCGGGCACTCCTGCGCGGGGAAGCTGTTTAAACCTCATCATTTAGAGGAAGGTGAAGTCGTAACAGGGTTTCC
895	8166ff4cd4f1481127821b6a44437754	OTU_895	132	414	12	GTCGCACCTACCGATTGAATGGTCCGGTGAATTTCTCGGACTGTGGCAATGTCGCCTTCATTGGGGACGCTGCCGCGGGAAGTTAATTAAACCTTACCATTTAGAGGAAGGTGAAGTCGTAACAAGGTATCC
896	67e015318911e2f6e7ea8dc39f2da215	OTU_896	136	414	1	GTCGCTACTACCGATTGGATGGTTTAGTGAGATCCTCGGATTGGTCCTGGCCTGGCGGGCAACCGCCGAGCCAGCGTGCCGAGAAGACGATCGAACTTGATCATCTAGAGGAAGTAATAGTCGTAACAAGGTTTCC
897	f6814391613bce9ac1ffdc9565e4d114	OTU_897	106	413	7	GTCACATCACGAAAGCTGGTTGCACCTGAAAACGGTGAGCGAACCCTCGGGACGCAGCTGTTTACGGTGTGATTGGTGATTGGGGTGAAGTCGTAACAAGGTAGCT
898	a77a933c5d8597b33a1bca55c122aa38	OTU_898	133	413	6	GTCGCTCCTACCGATTGAATGATCCGATGAATATCATGGATTGAGGATGCAAGTAGGTTCGTCCTATCTTCATCTTCGAGAAGTGAAGTAAATCTTATCATTTAGAGGAAGGAGAAGTCGTAACAAGGTTTCC
899	e1a47bafe9102893889957caf62ce507	OTU_899	105	413	15	GTCAAGCCACGAAAGTGGGGGGCACCCGAAGTCGCTGAGCTAACTTTTAGAAGCAGGCGCCGAAGGTGAACTCCGCAATTGGGACTAAGTCGTAACAAGGTAGCC
900	a54271d278be87a7772be2c679c37247	OTU_900	127	413	4	GTCGCTCCTACCGATTGAATGTTCCGGTGAATACTTCGGACTGCGAGGTTTGCAGTTTCTGCGCTCCTTGCGGAAAGTTGAATAAACCTTAACATTTAGAGGAAGGAGAAGTCGTAACAAGGTTTCC
901	3e3d40149aa8c5f86461c3f12a53df02	OTU_901	131	412	4	CCGTCGCTCCTACCGATTGAGTGATCCGGTGAATAATTTGGACTGCAGTTGATTTCAGTACCTGAAGTCTTCAGTGGGAAGTTTAGTGAACCTTATCACTTAGAGGAAGGAGAAGTCGTAACAAGGTTTCC
902	deeeae7130dfb49a9e61ac68e9cc2930	OTU_902	133	412	2	GTCGCTACTACTGATTGGACGTTTAAGCGAGATCTTCGGACCTCGGGCTCATGGTTCAACCGGATCTAGAGCTATGGGGGAAGTAGATCAAGCTTTGGTGTCTAGAGGAAGTAAAAGTCGTAACAAGGTTTCC
903	b891a89c7735e55b19ade254fc9f1cf4	OTU_903	136	412	2	GTCGCTACTACCGATTGAATGGTTTAGTGAGATCTCCGGATTGGCTCTGTAAGTCCTTCACGGGATTTATTTGTTGCCAAGAAGCTGCTCAAACTTGATCATTTAGAGGAAGTAAAAGTCGTAACAAGGTTTCCGT
904	d87418b490da0b34b0aa3734dac0b70f	OTU_904	131	411	2	CCGTCGCTCCTACCGATTGAGTGATCCGGTGAATCATTTGGATTGCGATTGCATTTAGTCTTCTAGATGTATTGCACAAAGCTTTATGAACCTTATCACTTAGAGGAAGGAGAAGTCGTAACAAGGTTTCC
905	9ba2eff73ebea76bc2fe29bb1c8de67a	OTU_905	108	410	5	GTCACATCACGAAAGTTGGCTGTACCGGAAGCCGGTGGGCTAACCCGCAAGGGAGGCAGCTGTCCATGGTATGGTTGGCGATTGGGGTGAAGTCGTAACAAGGTAGCT
906	32890957422ed9b117f56b2be94120bb	OTU_906	112	410	4	GTCGCTACTACCGATTGAATGGTTTAGTGAGGCCTTCGGATCCGCGATTATTTGTGGAGAAGTTGGACAAACTCAGTCATTTAGAGGAAGTAAAAGTCGTAACAAGGTTTCC
907	73e84ec8b2305d06c79bba0ffd475fd2	OTU_907	132	409	10	GTCGCACCTACCGATTGAATGGTTCAGTGAGTTGTAGGGACCGTGGCTGAGTCACCTTTATTGGAGACACTGCCGTGGGAACTACTGCAAACTTCATCATTTAGAGGAAGGTGAAGTCGTAACAAGGTTTCC
908	d224c1e154669cd868146597f60e2380	OTU_908	127	407	1	GTCGCATCTATTGATAGTCGCTGCCATAAATTGGGCGAATCCGAAGCGCTCGACATCTGTCGGCGGTGTCGGTGAAGCCCTGTAAATGGTAGTTTCCAAAAACAGATAAAGTCGTAACACGGTTTTC
909	8fd7807f10d2b467e0d29ad56dc57255	OTU_909	128	406	4	GTCGCACCTACCGATTGAATGGTCCGGTGAAGCCTCGGGATTGTGGCCGGTGCCTTTATTGGTGTCGGTTGCGAGAACTTGTCTAAACCTTATCATTTAGAGGAAGGTGAAGTCGTAACAAGGTTTCC
910	4f66e86449257a03b7fdc6ef6daa752e	OTU_910	124	405	8	GTCGCTACTACCGATTTCGAGTGGTCCGGTGAATCTTTCGGACTGCGTGCGGCTTCGTGCCGTATTGCGGAAAGTCAGGTAAACCTTATCACTTAGAGGAAGTAAAAGTCGTAACAAGGTTTCC
911	ae570f38692580bac07044df6c6f1e34	OTU_911	104	405	8	GTCAAGCCACGAAAGTGGGGGGGGCTTAAAGTCGCTGAGCTAACTTCGGAAGCAGGCGCCTAGAGTCAACTCCGCGATTGGGACTAAGTCGTAACAAGGTAGCC
912	6b0798e191c33759131903a43b1dbc3e	OTU_912	101	405	9	GTCACATCATGGAAGCCGATCGCACCCGAAGTATCTGCGTCAACATTGGCAGGGTCCTAAGGTGTAGTTGGTAACTGGGATGAAGTCGTAACAAGGTAGCC
913	1389c301ff80037ebea52657d6bbee3d	OTU_913	116	404	2	GTCGCTCCTACCGATTGGGTGATACGGTGAAACTCTTGGAAGCAACTAGACCCTAGTTTGAAGAAGAGATTTGAATCGTTCCACTTAGAGGAAGGAGAAGTCGTAACAAGGTTTCC
914	35713afb877ab9767db811d5ba939944	OTU_914	136	404	15	GTCGCTACTACCGATTGAATCGTTTAGTGAGCTTGAGGGATCGATCTGCACCGGAGGGTTTTCCCGAACGTGCGTGAATGAGAGCTCAAACAAACTTGACGATTTAGAGGAAGTAAAAGTCGTAACAAGGTTTCCG
915	c4683ece2a5332287812190ba048a1bf	OTU_915	108	404	5	GTCACATCACGAAAGTTGGCTGTACCGGAAGCCGGTGGGCTAACCCGCAAGGGAGGCAGCTGTCCATGGTATGGTTAGCGATTGGGGTGAAGTCGTAACAAGGTAGCT
916	f1362897a64a8f1918b98d0d9ca2bdce	OTU_916	132	404	2	GTCGCACCTACCGATTGAATGGTCCGGTGAAGTTTTCGGACCGTCGCAATGTCAACCGTCAGGTAGACGTCGTGATGGGAAGTTACCTAAACCTTACCATTTAGAGGAAGGTGAAGTCGTAACAAGGTTTCC
917	00361504e62699ebbc7b8501205e94da	OTU_917	131	404	2	CGTCGCACCTACCGATTGAATGGTCCGGTGAAGACTCGGGATTGTAGCGTGGCTCCTTTATTGGTGCTTCGCCGCGAGAACTTGTCTAAACCTTATCATTTAGAGGAAGGTGAAGTCGTAACAAGGTTTCC
918	102f493c661139d66140c9d0e11f1f5f	OTU_918	131	403	2	CGTCGCTACTACCGATTGAACGTTTTAGTGAGGTCCTCGGACTGTTTGCCTGGCGGATTACTCTGCCTGGCTGGCGGGAAGACGACCAAACTGTAGCGTTTAGAGGAAGTAAAAGTCGTAACAAGGTTTCC
919	cde1c8c66c7a5e95b6ab76eb99fd92dd	OTU_919	131	403	10	CGTCGCACCTACCGATTGAATGGTCCGGTGAAAACCTGGGATATTAGATATGTGCCGTTTTAGGTATGTGTTTAGTAGAACTCGTTTAAACCTTATCATTTAGAGGAAGGTGAAGTCGTAACAAGGTTTCC
920	01ff0ecfc487c42fd4120a9235fa4069	OTU_920	131	403	12	GTCGCACCTACCGATTGAATGGTCCGGTGAAATTTTCGGACCGCTGCAATGTCGCCTTAACGGGGACGCTGCATTGGGAAGTTAATTAAACCTTACCATTTAGAGGAAGGTGAAGTCGTAACAAGGTTTCC
921	305730c18c4c59804e95e746b21eca13	OTU_921	131	403	6	CCGTCGCTCCTACCGATTGAGTGATCCGGTGAATCATTCGGACCGCAGCAGAACCCAGTTCCTGGGACCTGCAGTGGGAAGTTTCGTGAACCTTATCACTTAGAGGAAGGAGAAGTCGTAACAAGGTTTCC
922	ee01e5e6a4dbc6e70757976b769a1087	OTU_922	132	402	1	GTCGCTACTACCGATTGAATGGCTTAGTGAGGTCTCCGGATTGGCCTTGGGAAACCGGCAACGGTTACTCTTGGCTGAGAAGCTGATCAAACTTGGTCATTTAGAGGAAGTAAAAGTCGTAACAAGGTTTCC
923	41f38f60972fb1805cf290b6b43000eb	OTU_923	131	401	9	CCGTCGCTCCTACCGATTGAGTGTTCCGGTGAATAATTCGGACTGCAGCAGCGTGGGGACTCCTCATGCTGCAGCGGAAAGTTTGGTGAACCTTAACACTTAGAGGAAGGAGAAGTCGTAACAAGGTTTCC
924	16fff64e55ab5311c7796e20a94e2eae	OTU_924	137	401	10	GTCGCTACTACCGATTGGATGGTTTAGCGAGAGCCTTGGATTGGAGCCCGGGTGGTCAGCAATGGCCGCCCGGGAGTCCCTGAGAAATTGCTCCAGCTTGATCATCTAGAGGAAGTAAAAGTCGTAACAAGGTTTCC
925	d3d330ad818731b570192fa3fe45196a	OTU_925	131	401	1	CGTCGCACCTACCGATTGAATGATCCGGTGAAGCCTCGGGATTGCAGCTAGTCCGCTTTAGTGTGGGTTGGTGGCGAGAACTTGTCTGAACCTTATCATTTAGAGGAAGGTGAAGTCGTAACAAGGTTTCC
926	7781618880f9a2d384e8797c537c5455	OTU_926	131	400	4	CCGTCGCTCCTACCGATTGAGTGATCCGGTGAATAATTCGGACTGCCGCAGTGTTCAGTTCCTGAACGTTGCAGTGGAAAGTTTAGTGAACCTTATCACTTAGAGGAAGGAGAAGTCGTAACAAGGTTTCC
927	f362c30945d5dd313b5d4191a7aacb11	OTU_927	223	400	1	GTCGCACCTACCGATTGAGCGTTCCGGTGAGTTGTCGGGATTGTAGTTGGATCCTTTATTGGATCCTGCCGCGAGAACCTCCACAAACCTTATCGCTTAGAGGAAGGTGAAGTCGTAACAAGGTTTCCGTAGGTAAGAATAAATATGATGTTCCCGATGTACCCATGTCTCTTTTGATCTGATCATGATCTTACACCCTTATCTTTCTCTCTATCTATCTATT
928	b4eaaf01629f4934f53279885001f499	OTU_928	105	399	5	GTCGTTTCTTCCGACTGATACTCATTGTGAGTTGCAAGGATTCAACTTGAAAAATTGCTGCGAATGCTTTGTATTGGAGGAAGAAAAAGTCGTAACAAGGTTATC
929	0790cfa8cf768dc876c5998a526ed899	OTU_929	132	399	2	GTCGCTACTACCGATTGAACGTTTTAGTGAGGTATTTGGACTGGGCCTTTGAGGGTTTGCGCCTTCAATGTTGTCCGGGAAGACTCCCAAACTTGAGCGTTTAGAGGAAGTAAAAGTCGTAACAAGGTTTCC
930	5e7241a13c2858cae50e80d35b2a6253	OTU_930	136	399	3	GTCGCTCCTACCGATTGAAGTTTTCGGTGAATTTGCTGGAGATTGTTTTTTGAAACTGGTTCGCCAGTGGATAATATAACCAAAAGCAAATGAATCGATGGCTTTAGAGGAAGGAGAAGTCGTAACAAGGTTTCCG
931	8f3cc2cbfe2dafd73d84e899ecc0ccb7	OTU_931	117	398	15	GTCGCTCCTACCGATTTTGAGTGTTCCGGTGAACTGTCTGGACTGAGTTGCTCTGCGATAAAGGAAGTTCAGTAAACCTTATCACTTAGAGGAAGGAGAAGTCGTAACAAGGTTTCC
932	336bb1f28f156fe8b7e1008d2876138e	OTU_932	128	398	4	GTCGCACCTACCGATTGGATGGTCCGGTGAAGCCTCGGGATTGTGACCGGTGCCTTTACTGGTGTCGGTCGCGAGAACTTGTCTAAACCTTATCATCTAGAGGAAGGTGAAGTCGTAACAAGGTTTCC
933	355b3fd304cb8c3b4b6529bc25d38da0	OTU_933	133	397	1	GTCGCTACTACCGATTGAATGGTTTAGTGAGGTCCTCGGACCGCGCCACGCCAGGTCTCTGGCCTAGCGTGAGTCGCGGGAAGATGATCAAACTTGATCGTTTAGAGGAAGTAAAAGTCGTAACAAGGTTTTC
934	29f0fa0e84f1519fd9ca6956a9b61b4c	OTU_934	107	396	1	GTCACACCACGAAAGATGAATTGACCCGAAGTCGTGCACCTAACCCTTGTGGAGGGAAGCGCCTACGGTTGGTTCGATGATTGGGGTGAAGTCGTAACAAGGTAGCT
935	a4dea37a466bba65f24520a32ae23abb	OTU_935	136	395	4	GTCGCTACTACCGATTGAATGGTTTAGTGAGTTCATCGGACCGGCCCCGGCACGGCAGTCTCTGTCGAGCCGTGGTGCCGGGAAGACGCACGAACTTGATCATTTAGAGGAAGTAAAAGTCGTAACAAGGTTTCCG
936	f90a59f4f53941c662588f173b9d0d59	OTU_936	131	394	11	CGTCGCTCCTACCGATTGGATGGTCCGGTGAATTGATCGGACTGATGAATATTTTCGCGGGTGCGAAATTATCACAGAAAGTTCAATAAGCCTTATCATCTAGAGGAAGGAGAAGTCGTAACAAGGTTTCC
937	5961c273675af29bf626f039027d787c	OTU_937	132	394	2	GTCGCTACTACCGATTGAATGGCTCAGTGAGGCCTTCGGACTGGCGCCGGAGGGTTGGCAACGACCCCCCAGCGCCGGAAAGTTGGTCAAACTCGGTCATTTAGAGGAAGTAAAAGTCGTAACAAGGTTTCC
938	c57884896d327395d4b71f7e9c019609	OTU_938	131	392	6	CGTCGCTCCTACCGATTGAGTGATCCGGTGAATAATTCGGACCGGCGCCTTAATTGGTTCTCCGATTTCGGTGCTGGAAAGTCTAGTGAACCTTATCACTTAGAGGAAGGAGAAGTCGTAACAAGGTTTCC
939	2c19e96112c5f9ea656d2e4caea223f2	OTU_939	106	392	2	GTCACACCCTGGAAATTGTTTCTAATTGAAGCTTGTTACCTAACCGAAAGGAGGGGATCTGTGAGATTGGAGAGAGTGACTGGGGTGAAGTCGTAACAAGGTAGCT
940	d13c8e913d430c5f8fc90593131b9636	OTU_940	131	392	2	GTCGCTACTACCGATTGAATGTTTTAGTGAGGTCCTTGGACTGCTGCCGTGGCAGGTCATACTGCCACCGCTAGCGGAAAGACGATCAAACTTGAGCATTTAGAGGAAGTAAAAGTCGTAACAAGGTTTCC
941	7e49dbbd1d2e2ddafb8e7b4259c73a89	OTU_941	131	392	4	CCGTCGCTTGTACCGATTGAGTGATCCGGTGAATAATTCGGACCGGCATCTTAGGTGGTTCCCACTTTTGACGCTGGAAAGTCTAGTGAACCTTATCACTTAGAGGAACAAGAAGTCGTAACAAGGTTTCC
942	cde486094531f822ac5732b9bfa71bd4	OTU_942	131	392	13	CGTCGCACCTACCGATTGAATGGTCCGGTGAAAATTCGGGATCTTGAGTAGGTGCCGTTTCTGGTATCATCTTGAGAGAACTTATTTAAACCTTATCATTTAGAGGAAGGTGAAGTCGTAACAAGGTTTCC
943	0eca93dbb2512f07c27aff0c53eb74be	OTU_943	104	392	2	GTCGCTCCTACCGATTGGGTGATCCGGTGAATAATTTGGATGCGAAAGCAGAAGTTTTGTGAACCTTATCACCTAGAGGAAGGAGAAGTCGTAACAAGGTTTCC
944	4903d53cde5f2c86ee6144abecb0b23c	OTU_944	136	392	5	GTCGCTACTACCGATTGAATGGTTTAGTGAGATCCTCGGATTGGACCCGTCTCGGAGGGCAACCTTCGAGACGGTGTGCCGAGAAGACGATCAAACTTGATCATTTAGAGGAAGTAAAAGTCGTAACAAGGTTTCC
945	333002c48bb8b96bc8321165a8da9a42	OTU_945	131	391	6	GTCGCTACTACCGATTGAATGTTTTAGTGAGCCCTCTGGATTGTTGTATCTCGTTGGAAACTTCGAGACACTTTCGAGAAGGAGGTCAAACTTGATCATTTAGAGGAAGTAAAAGTCGTAACAAGGTTTCC
946	e7920eadb1b1f7f04e2e12f46e6ec77d	OTU_946	131	390	7	CGTCGCACCTACCGATTGAATGTTTCGGTGAAACTTTCGGACTGCGGCTTTTGGACCCTCGGGTCCTTTGGCCGTGGAAAGTTATTTAAACCTCAACATTTAGAGGAAGGTGAAGTCGTAACAAGGTTTCC
947	b929982d3334a24fd0880f4c8149e81f	OTU_947	132	389	10	GTCGCACCTACCGATTGAATGGTCCGGTGAAATCTTCGGATCTGAGAGATGCTGGATTCATTTTTGGCGTCTTTTAGAAAAGTTGCTTAAACCTTATCATTTAGAGGAAGGTGAAGTCGTAACAAGGTTTCC
948	fb0e6db20eb4113a4ed4825b2fa75d25	OTU_948	131	389	2	CCGTCGCTCCTACCGATTGAATGTTCCGGTGAATAATTCGGACCATGGTTGTTGGGCCTGTGCCACTGCAGCTAGGGGAAGTTTAGTGAACCTTAACATTTAGAGGAAGGAGAAGTCGTAACAAGGTTTCC
949	017fe4dace06671290a918ca61ced4f4	OTU_949	106	388	9	GTCACACCATGGGAGTTGGTTCTACCCGACGACGCTGCGCTAACCTTCGGGGGGCAGGCGGCCACGGTAGGATCAGCGACTGGGGTGAAGTCGTAACAAGGTAGCC
950	d792d4cea6b7a1f80d1cd7a0e1e674ab	OTU_950	131	388	1	CGTCGCACCTACCGATTGAATGGTCCGGTGAGGCCTCGGGATTGTGGCCAGTTTCCTTTATTGGGAGTTGGCTGCGAGAACTTGTCCAAACCTTATCATTTAGAGGAAGGTGAAGTCGTAACAAGGTTTCC
951	9b0bb9f552af1bc3ddaa3b9bcd5ca974	OTU_951	243	388	13	GTCGCACCTACCGATTGAGTGTTCCGGTGAAGCCTCGGGATTGTAGTTGGCTTCCTTTATTGGATGCTGGCCGCGAGAACTTGTCTAAACCTTATCACTTAGAGGAAGGTGAAGTCGTAACAAGGTTTCCGTAGGTAAGACATATTTAAACTGGACACAATGTCCAATCTCAATCTCTTTTCTTTGATCCTTGACCAGTTAAACTAACAACACATTTTCTTCACTTCTTTCTATCCCATCATT
952	46b855491ce929b9d18d9c2d55c3699d	OTU_952	137	386	5	GTCGCTACTACCGATTGAATGGTTTAGTGAGGCCTCCGGATTGGCACTGTCAGATGGGCTTCGGCCCATCCGACGGACGTCAAAAAGTTGGTCAAACTTGATCATTTAGAGGAAGTAAAAGTCGTAACAAGGTTTCC
953	db9efc7682ef04461346a26f5a2a2ec2	OTU_953	128	386	3	GTCGCTCCTACCGATTGGATGATTCGGTAAGCTCTATGGATTGCCTTTGTTCTCTGTTTCAGAGACTTCGGTGAGAAACTGATCAAACCTAATTATCTAGAGGAAGGAGAAGTCGTAACAAGGTTTCC
954	6c9244c8218858d9d03859e79087ad8c	OTU_954	128	384	4	GTCGCTCCTACCGATTGAGTGATCCGGTGAATAATTTGGACTGCTGCATTGCTCAGTTACTGACATTGTGGCGGGAAATTTAGTGAACCTTATCACTTAGAGGAAGGAGAAGTCGTAACAAGGTTTCC
955	d0f92075ebaedee6c01d7421f2acc701	OTU_955	131	384	7	CGTCGCACCTACCGATTGAATGGTCCGGTGAGGACTCGGGATTGTGGTTTGGTTCCTTCATTGGGACTTGACCGTGAGAACTTGTCCGAACCTTATCATTTAGAGGAAGGTGAAGTCGTAACAAGGTTTCC
956	026b5972bbff3c7daa1bbac761b9b9fd	OTU_956	136	383	3	GTCGCTCCTACCGATTGAATGTTAAGGCGAACCCTCCGGAATCGTGGCTTGGATTGGGCAACCTTTCCTAGCCAATCGATGAAGTTGTGTAAGCCTTGACATTTAGAGGAAGGAAAAGTCGTAACAAGGTTTCCGT
957	179fa595c591c51b7947253366275a41	OTU_957	105	383	2	GTCGTTTCTTCCGACTGGTATTGATTGTGAGTTGCAAGGATCTGTTATGGAGAATTGCTGCGAATGCTCTGTATTGGAGGAAGAAAAAGTCGTAACAAGGTTATC
958	4d3db3591974b71509500585bd052b1e	OTU_958	106	382	1	GTCACACCATGGGAGTTGGCTTTACCTGAAGCCGGTGCGCTAACCGCAAGGAAGCAGCCGACCACGGTCAGGTCAGCGACTGGGGTGAAGTCGTAACAAGGTAGCC
959	28b9750cea370674267fef57a13dc6b9	OTU_959	115	382	10	GTCGCTCCATCTGATTGGGTGTGCAGGTGAAACTGGTCTTATATGTAATCTCTTTCGTTTAAAGAGCAAGTGAACAGGCCCACTAAGAAGAAGGAGAAGGCGTAACAAGGTTTCC
960	baebd009d03bc9be76888a3f10ab2ea7	OTU_960	133	382	4	GTCGCTACTACCGATTGAATGGTTTAGTGAGGCCTTCTGACTGGCGCCGATGCTCTGGCAACAGAGCGCCGGATGCCGGAAAGTTGGTCAAACTTGATCATTTAGAGGAAGTAAAAGTCGTAACAAGGTTTCC
961	591e91b8d320f48046b037f20b6d8942	OTU_961	128	381	10	GTCGCTCCTACCGATTGAGTGATCCGGTGAATAATTCGGACCTGACTTTTTCCTGGTTTCAGGATTTTGTCGGGAAAGTCTAGTGAACCTTATCACTTAGAGGAAGGAGAAGTCGTAACAAGGTTTCC
962	8a161f1a9dd6fb3e6a1f8b2c3f99a0e0	OTU_962	108	381	7	GTCAAGCCACGAAAGTTGGGAGGGCCCGAAGTCGCTAAGCTAACTCGCAAGAGAGGCAGGCGCCGAAGGTCAGCTCGACAATTGGGACTAAGTCGTAACAAGGTAGCC
963	34ca0bdea7bde7da09d2aaa70ef4e59d	OTU_963	107	380	11	GTCACACCACGAAAGTTTTTTGTACCCGAAGTTGTCTTAGCTAACCTTTTGGGGGCGGCCAACGACGGTATGGGAGATGATTGGGGTGAAGTCGTAACAAGGTAGCT
964	559689796a17ca8dbc32ec152853f003	OTU_964	131	380	9	CGTCGTTGCTACCGATTGGCTGTGGGATAGAGCTGGACGGAGATGAGCGTTGAGGGCTTTGTACCGCTTCGTTTGTCGAATTTCAGCAATATTTCTCAGCTAGAGGAAGCAAAAGTCGTAACAAGGTTGCT
965	9d207f0e34156c052cabb06da80d8634	OTU_965	131	380	8	GTCGCTACTACCGATTGGATGGTCTGGTGAGTCTTTCGGACTGCGGCTCTGGTTCGGGCAACCGGACCTTGCTGCGGGAAGTTACGCAAACCCTATCATCTAGAGGAAGTAAAAGTCGTAACAAGGTTTCC
966	a1040ce506e4b6a606c797cf69192f3f	OTU_966	138	379	2	GTCGCTACTACCGATTGAACGGTTTAGTCAGGTCTTCGGATCGGTACGCGGCGGGGCCGCTCGTCGGGCTCGCTGGCGCGCCGAGAAGATGATCGAACTTGATCGTTTAGAGGAAGTAAAAGTCGTAACAAGGTTTCC
967	a7d6081bcbb6acb45ad72c716cdd1520	OTU_967	104	378	4	GTCGTTTCTTCCGACTGATACGAATTGTGAGTTGCAAGGACCTTTCGAGGGAATTGCCGCGAATGCTTCGTATTGGAGGAAGAAAAAGTCGTAACAAGGTTATC
968	4f511571264e2d3889821e819a9b0468	OTU_968	133	378	2	GTCGCTACTACCGATTGGATGGTTTAGTGAGCACTCTGGATTGGCGCCGCCGGCTCAGCGATGGGTCGGCGGAGGCCGAGAAGTTGTGCTAACTGTGTCATCTAGAGGAAGTAAAAGTCGTAACAAGGTTTCC
969	7d172b06f4d318709372a17b726220c9	OTU_969	131	378	3	CGTCGCACCAACCGATTGGATGTTTTGTTGAAATATGTGGATGTTTGTTACGTGGATTCATTTTTGCGCTATAGACAGAAACGTATTAAAACTGATCATCTAGAGGATGGTGAAGTCGTAACAAGGTTTCC
970	6a68a31dc9020083dfdd92a176255aa3	OTU_970	104	378	1	GTCGTTTCTTCCGACTGATACTCATTGTGAATTACAGGGATAAGTATTTAAAACTGTTGTGAATGCTGGGTATTGGAGGAAGAAAAAGTCGTAACAAGGTTATC
971	73a48f9000ba745fbd7a3ea7b570ddab	OTU_971	133	377	1	GTCGCTCCTACTGATTGAATGTTCCGATGAATACCATGGATTGAGAGTCTGAATAGGTTCGCCTATTTCTGCTTCTCGAGGAGTGGAGTAAATCTTAACATTTAGAGGAAGGAGAAGTCGTAACAAGGTTTCC
972	8a94db53d854f9d9c26096e8d16b05d1	OTU_972	121	377	2	GTCGCTGCTACCGATTTCGAGTGGTCCGGTGAACCTTTTGGACTGACACGGTCTCGAACCGCATCGGGAAGTTAAGTAAACCTTATCACTTAGAGGAAGCAGAAGTCGTAACAAGGTTTCC
973	afef5ecec1a5d1862b6b1f8a2b4f2c72	OTU_973	121	377	4	GTCGCTCCTACCGATTTCGAGTGATCCGGTGAACCTTTTGGACCGCTGATGCCTCGTGTGTTAGCGGGAAATCAAGTAAACCATATCACTTAGAGGAAGGAGAAGTCGTAACAAGGTTTCC
974	3e754e3da26a8b0e2a95d49710eb3546	OTU_974	117	377	1	GTCGCTCCTACCGATGAGTCGTCCGGTGAAGTTCGTAGACCTTGTGCTCTTTGAGCAGTGGGGGAAGCAAAATGAACCTCGCGGTTTAGAGGAAGGAGAAGTCGTAACAAGGTTTCC
975	4703db483f5dba6091bdd88259700184	OTU_975	132	376	3	GTCGCTACTACCGATTGAACGTTTTAGTGAGGTGTTTGGATTGGACCTCTTGAGATTCACGTCTCGAGTGTCGTTCGAAAAGATCCCCAAACTTGAGCGTTTAGAGGAAGTAAAAGTCGTAACAAGGTTTCC
976	72a73f3585a17dc1baf2416d45d66857	OTU_976	133	376	3	GTCGCACCTACCGATTGAATGGTCCGGTAAAGTTTTCGGACCTTGGCAATGTCGCCTTTATCGGGGGACGCTGCTATGGGAAGTTAATTAAACCTTACCATTTAGAGGAAGGTGAAGTCGTAACAAGGTTTCC
977	c260239cabebbc53e62f8b54b282cc34	OTU_977	106	376	1	GTCACACCATGGGAGTGGATGGCACCAGAAGTGGTTAGACTAACCTGCGGGAGGTCGATCACCACGGTGTGATTCATGACTGGGGTGAAGTCGTAACAAGGTAGCC
978	82ec8ffa4a62d3dda47208a3c2430b69	OTU_978	131	375	2	CGTCGCTACTACCGATTGGACGTTTTAGTGAGACATTTGGACTGGGTCAGAGTAGTCGAAAGACTATTCTGTCTCGGAAAGACTTTCAAACTTGAGCGTCTAGAGGAAGTAAAAGTCGTAACAAGGTTTCC
979	759a4e2e4f1703388a6827b5e7656cfa	OTU_979	136	375	7	GTCGCTCCTACCGATTGAATGATCCGGTGAGGCCCCCGGACTGGAGCAACTGGAGTGGTTCGCCATCCCGGATGCCTCGGGAAGCTGTCCAAACCTTATCATTTAGAGGAAGGAGAAGTCGTAACAAGGTTTCCGT
980	77498d461e47ed9e231ed533122ee565	OTU_980	131	375	13	GTCGCTACTACTGATTGGATGTTTAAGCGAGGTTCTCGAACTGCTAGCGATCTAGCTTCGGTGAAATCGCAGTGTGGGAAGTGAACCTAGCTTTGGTGTCTAGAGGAAGTAAAAGTCGTAACAAGGTTTCC
981	45f97ca02bdd289864b6dc65e82202cd	OTU_981	131	375	3	CGTCGCTCCTACCGATTGAGTGATCCGGTGAATAATTCGGACCGATAGCCTGCGTGGTCCGCCACACGGGTTGTTGGAAAGTCTGGTGAACCTTATCACTTAGAGGAAGGAGAAGTCGTAACAAGGTTTCC
982	eae9404e002f273afb975a3f00154f7c	OTU_982	132	375	1	GTCGCTACTACCGATTGAATGGTTTAGCGAGATGCTCAGATCGAGCCTTGATCGTGCGCAAGCATGGCCGAGGCTTGAGAAGAAGTTCAAGCTTGATCATTTAGAGGAAGTAAAAGTCGTAACAAGGTTTTC
983	049acb1cb8c8405de3ee2235d67df099	OTU_983	128	373	6	GTCGTTGCTACTGATTGGCTGTAGGGTAGAGATCGGCAGATTCTAGGCTGTTGGGGCAACTCTTCAGCTTGGGAGAAACCTATCAATATTCTGCAGCTAGAAGAAGCAAAAGTCGTAACAAGGTTGCT
984	35557e5855110c4ee58859feb6f8fdd7	OTU_984	131	372	6	CGTCGCTACTACCGATTGAACGTTTTAGTGAGGTCCTCGGATTGTTTGCCTGGCGGCTAACCCTGCCTGGCTGGCGAAAAGACGACCAAACTTGAGCGTTTAGAGGAAGTAAAAGTCGTAACAAGGTTTCC
985	9bf626defbf2953d535fad16b77e3d75	OTU_985	139	372	2	GTCGCTACTACCGATTGAATGGTTTAGTGAGGCCCTCGGACGGGTCCCGGGCTGGCCTTCGTGGCCGGCTGTCTTGGCGTGCCTGAAAGACGGTCGAACTTGATCATTTAGAGGAAGTAAAAGTCGTAACAAGGTTTCC
986	c742840c5a0ced5c9d2b47cfaf9affa4	OTU_986	107	371	6	GTCACATCACGAAAGTAGGTTGTACTAGAAGTAGCTGGGCTGACCCTTTGGGAGGCAGGTTACTACGGTATGATCTATGATTGGGGTGAAGTCGTAACAAGGTAGCT
987	f0f0955dda09229701f0f9fcd6d949a7	OTU_987	127	371	9	GTCGCTCCTACCGATTGAGTGATCCGGTGAGTCCTTTAGAGTGTGTTGCATGTAGTATCTACCCGCCACGTGCGAAGTTGAACAAACCTTATCACTTAGAGGAAGGAGAAGTCGTAACAAGGTTTCC
988	a371091c3c05bd860c97db4caa15bfcf	OTU_988	106	370	5	GTCACACCATGGGAGTGGGTTGCTCCAGAAGTAGCTAGTCTAACCGCAAGGAGGACGGTTACCACGGAGTGATTCATGACTGGGGTGAAGTCGTAACAAGGTAGCC
989	8875734de33cf2cc1f848fe9cdfef2f1	OTU_989	131	370	9	CGTCGCTGCCTCCGATTGAGTGATCCGGTGAATAATTCGGACCGACAACTCGTTTGGTTCGCCGAACTTGTTGTTGGAAAGTCTAGTAAACCTTATCACTTAGAGGAAGCAAAAGTCGTAACAAGGTTTCC
990	e911d344d831675d9d57e48ee02821f0	OTU_990	123	370	1	GTCGCTGCAACTGATTGGGTGACCTGGTGAACTGCGTGGACCAGCTTTTCCAATCATGGTTAAGCAGGGAAAGGCCGTAAATCAGGTACATCTAGAAATTGCAAAAGTCGTAACAAGGTTTCC
991	3d1004d790000d20c7d78dec2d2f1ac7	OTU_991	131	369	6	CCGTCGCTCCTACCGATTGAGTGATCCGGTGAATAATTCGGACTGCAGCAGCGTTCGGATCCCGAATGCTGCAGTGGAAAGTTTAGTGAACCTTATCACTTAGAGGAAGGAGAAGTCGTAACAAGGTTTCC
992	5343ac69bdc014d2c52b7f786498f2a5	OTU_992	136	369	2	GTCGCTACTACCGATTGAATGTTCTGGTGAAATCATTGGAGTGGTGCCGATGGGGTGGTCTCCACTCCATGGGAAACCGCGAAGACGCTTAAACCTGAGCATTTAGAGGAAGTAAAAGTCGTAACAAGGTTTCCGT
993	0d59d323b38acb3bc8237e9434f2a0f1	OTU_993	131	368	2	CGTCGCACCTACCGATTGAATGGTCCGGTGAAGCCTCGAGATTGTAGTTAGTTTCCTTTATTGGATGTTAGCCGCGAGAACTTGTCTAAACCTTATCATTTAGAGGAAGGTGAAGTCGTAACAAGGTTTCC
994	1ea0ff126316e4a53174f3ab9ef5b1a9	OTU_994	131	367	14	CGTCGCTCCTACCGATTGAGTGATCCGGTGAATAATTCGGACCGGCGCCTTGTTTGGTTCGCCGAACTCGGTGCTGGAAAGTCTAGTGAACCTTATCACTTAGAGGAAGGAGAAGTCGTAACAAGGTTTCC
995	64684c8037ed345b5f102018c3e42ae7	OTU_995	131	367	4	CCGTCGCTCCTACCGATTGAGTGATCCGGTGAATAACTCGGACTGCAGCAGTGTTCGGTTCCTGAACGTTGCAGCGGAAAGTTTAGTGAACCTTATCACTTAGAGGAAGGAGAAGTCGTAACAAGGTTTCC
996	4d14f84c30e222badafdac024025349d	OTU_996	136	366	6	GTCGCACCTACCGATTGAATGGTCCGGTGAAATCTTTGGACCGTGGCATCGTCTTACTTTCGGGTAAGACTTTGCCGTGGGAAGTTGATTAAACCTTACCATTTAGAGGAAGGTGAAGTCGTAACAAGGTTTCCGT
997	7ed16db1b64ae75bf9faca1ffd9128a9	OTU_997	108	365	11	GTCACATCACGAAAGTTGGCTGTACTAGAAGTCGCTGGGCCAACCCTTCGGGGAGGCAAGTGCCGACGGTATGGTTGATGATTGGGGTGAAGTCGTAACAAGGTAGCT
998	9abc452c69c745c80c745ae33e861751	OTU_998	128	365	12	GTCGCTCCTACCGATTGAGTGATCCGGTGAATTGTTCGGACCTGCTGGTTCCTCGGTTCCGGGGTTCTAGTGGGAAAGTTCTGTGAACCTTATCACTTAGAGGAAGGAGAAGTCGTAACAAGGTTTCC
999	99a9c0517959a49d6a1b7cfc05f030cd	OTU_999	131	364	1	GTCGCTCCTACCGATTGAATGTTCCGGTGAGCTCTTTGGAGTTGTGTTTTTCGCGTATCTTCGCGTTAAATATCAGCAAAGCTGCGCGAACCTTAATATTTAGAGGAAGGAGAAGTCGTAACAAGGTTTCC
1000	afe94f17f1ca60cc26d48f60f9981be7	OTU_1000	131	364	2	CGTCGCTACTACCGATTGAACGTTTTAGTGAGGTCCTCGGACTGTCTGCCTCGCAGCTAACCCTGCTTGGCTGGCGGGAAGACGACCAAACTTGAGCGTTTAGAGGAAGTAAAAGTCGTAACAAGGTTTCC
1001	ac68e3a58e623d95997c4bf63bb5a025	OTU_1001	132	364	4	GTCGCTCCTACCGATTGAATGATCCGATGAATATCATGGATTGAGGATGCAAGTAGGTTCGCCTGTCTTCATCTTCGAGAAGTGAAGTAAATCTTATCATTTAGAGGAAGGAGAAGTCGTAACAAGGTTTCC
1002	6d716925108d6b4f0f9285e6c8faaaf7	OTU_1002	137	363	4	GTCGCTACTACCGATTGAATGGTTTAGTGAGGCCTCCGGATTGGCACTGTCAGATGGACTTCGGTTCATCCGACGGACGTCAAGAAGTTGGTCAAACTTGATCATTTAGAGGAAGTAAAAGTCGTAACAAGGTTTCC
1003	44dbc2a8823efdf182d6266d5804c420	OTU_1003	127	362	2	GTCGCTCCTACCGATTGAGTGATCCGGTGAATAATTCGGACTGAGATTCTTCCGGCAACGGTTTGAGTTTTGGAAAGTCTAGTGAACCTTATCACTTAGAGGAAGGAGAAGTCGTAACAAGGTTTCC
1004	d37370e3548fa95f9c776b2ae91d822c	OTU_1004	132	362	1	GTCGCACCTACCGATTGAATGACTCGGTGAAAAATTGGGACTGTGATTTTACTTGATTCATTTCAAGTTTTATTATGGGAACTTTCTTTAACCTATTCATTTAGAGGAAGGTGAAGTCGTAACAAGGTTTCC
1005	cddfe11d0cee76700d1da01c3b8722ba	OTU_1005	131	362	8	CCGTCGCTCCTACCGATTGAGTGATCCGGTGAATAATTCGGACTGCAGCAATGTTTAGTTCCTGAGTGTTGCCGTGGAAAGTTTAGTGAACCTTATCACTTAGAGGAAGGAGAAGTCGTAACAAGGTTTCC
1006	bcbffe8f41ab6bd611ab4d25fc14114b	OTU_1006	132	361	10	GTCGCACCTACCGATTGAATGGTCCGGTGAAATCTTCGGATTGTGACTTTGACTTGTTTATTCAAGACGTTGTTGTGAAAAGTTGATTAAACCTTACCATTTAGAGGAAGGTGAAGTCGTAACAAGGTTTCC
1007	b4b5083016373f6b8b0cda76823fbe5a	OTU_1007	132	361	2	GTCGCACCTACCGATTGAATGGTCCGGTGAAATTTTCGGACCGTGACAATGTCGCCTTCATTGGAGACGCTGTCATGGGAAGTTACTTAAACCTTACCATTTAGAGGAAGGTGAAGTCGTAACAAGGTTTCC
1008	0287834c95035e535a0cb58018b0add9	OTU_1008	136	360	5	GTCGCTACTACCGATTGAATGGTTTAGTGAGATCCTCGGATCGGCCGGGTCGGGCCGGTTCGCCGGCTCGATCCTGTGCCGAGAAGACGATCAAACTTGATCATTTAGAGGAAGTAAAAGTCGTAACAAGGTTTCC
1009	fbcaa930da0e6d294856e2e2bf564b49	OTU_1009	131	360	3	CGTCGCTCCTACCGATTGAATGTTCCGGTGAATTTTCGGGAGGGTCTTGCGCTGGCTTCAAACCCGGCGCAGGACCTGAACTTACATAAATCTTAGCATTTAGAGGAAGGAGAAGTCGTAACAAGGTTTCC
1010	75fd01f2a9a5c5b0d6b684530be43690	OTU_1010	131	359	6	CCGTCGCTCCTACTGATTGAGTGATCCGGTGAATATTTTGGACTGCAGCAAGGCTCAGCTCCTGAGTGTTGCAGCACAAAGTTTAGTGAACCTTATCACTTAGAGGAAGGAGAAGTCGTAACAAGGTTTCC
1011	30e4d62373219c78f9cbb3b99fecea90	OTU_1011	131	359	2	GTCGCTACTACCGATTGAATGGTTTAGTGAGATCTTCGGATTGTGACAACGGGGATTTCGGTCCCTGCTGCTCGCGAGAAGTTGATCAAACTTGATCATTTAGAGGAAGTAAAAGTCGTAACAAGGTTTCC
1012	ba425a153e215fbd503dd8475ad16da6	OTU_1012	106	358	18	GTCACACCATGGAAGTTGGTTTTACCTTAAGGCAAGTTATTAACCCTCGGGGAATGCTTGACCACGGTAAAATTAGCGACTGGGGTGAAGTCGTAACAAGGTAGCC
1013	46339bdf98dce1104e12d98ad2961e89	OTU_1013	160	358	2	GTCGCTACTACCGATCGGATGGTTTGGTGAGGCCGCTGGACGGGAACCGGGCCGGTCTGCCCTGGCTCTCCTCGTGGGGGTTCAGGCTTCCGGCTGCAGGGGCCCGGAAGGCGTCCGAACTCGATCATTTAGAGGAAGTAAAAGTCGTAACAAGGTTTCC
1014	79a0fe70eef18be59e2fef4527eb4160	OTU_1014	113	357	9	GTCGCTACTACCGATTGAATGGCTTAGTGAGGCCTCAGGATCCGCGCCTAGTGTGTGGAGAATTTGGACAAACTACGTCATTTAGAGGAAGTAAAAGTCGTAACAAGGTTTCC
1015	741c2261997f3ac919f24133366c0b49	OTU_1015	136	356	7	GTCGCTCCTACCGATGAATGTTCCGATGAAATTTTCGGAGAGCGCCAGAGAACGGGGCTCTGCCTTGCAGATCTGGAGGCTCAAAGTCACTTAAATCTGAACATTTCGAGGAAGGAGAAGTCGTAACAAGGTTTCC
1016	ea2b3e3cde7fb93a20de5446311765bd	OTU_1016	106	355	7	GTCACATCACGAAAGCCAGGTGTACTAGAAGTCGCTGACCCAACCTTCGGGAGGGAGGCGCCGACGGTGTGCTTGGTGATTGGGGTGAAGTCGTAACAAGGTAGCT
1017	0739d96ec130a23079faaffda8e208f8	OTU_1017	131	355	4	CCGTCGCTCCTACCGATTGAGTGATCCGGTGAATAATTCGGACTGTGGCATTGTTCAGTTCCTGAACGCTGCCGCGGAAAGTCTAGTGAACCTTATCACTTAGAGGAAGGAGAAGTCGTAACAAGGTTTCC
1018	9c5b45fcbc1e49f485a5a379865ada73	OTU_1018	132	354	1	GTCGCTACTACCGATTGGGAAAATTTCAGAGGTGATTGGACTGGAACTAGTTCGGCTTAACGGCCTTACTTGATCCGGAAAAATTCCCTATGATATTTTCTTAGAGGAAGTAAAAGTCGTAACAAGGTTTCC
1019	0029dc7ef9a9d68873c07b38b4a1ef8f	OTU_1019	131	354	9	GTCGCTACTACCGATTGAATGGTTTAGTGAGATCTTCGGATTGTGGCAACGGGGATTTCGGTCTCTGTTGATTACGAGAAGTTGATCAAACTTGATCATTTAGAGGAAGTAAAAGTCGTAACAAGGTTTCC
1020	4f22baea4f688506fa3d84bb6edf096e	OTU_1020	133	354	2	GTCGCTACTACCGATTGAACGTTTTAGTGAGGTATTTGGACTGAGCCTCCGGAGGTTTTTGATCTCCGCTGTTGCTCGGGAAGACTCCCAAACTTGAGCGTTTAGAGGAAGTAAAAGTCGTAACAAGGTTTCC
1021	e1c24be99d74008c969ed711eaa969e7	OTU_1021	136	354	2	GTCGCTACTACCGATTGAATGGCTTAGTGAGGTCCCTGGATTCGCGCCGCCGTGGTCGGCAACGGCCGCAGCGGATGCGGAGAAGCTGACCGAACTGTGTCATTTAGAGGAAGTAAAAGTCGTAACAAGGTTTCCG
1022	d71dda64c8f1e2c9255816f46e705ad9	OTU_1022	132	353	7	GTCGCTACTACCGATTGAATGGCTCGGTGAGGCCTTCGGACTGGCTCAGGAGGGTTGGCAACGACCCCCCAGAGCCGGAAAGTTGGTCAAACCCGGTCATTTAGAGGAAGTAAAAGTCGTAACAAGGTTTCC
1023	9c6c397dcb00b1443165914c7793ac27	OTU_1023	131	353	7	GTCGCACCTACCGATTGAGTGGTCCGGTGAACCCTCGGGATCGCATGCAATTTCTTTCATTAGAATTTGACTGTCGAGAACTTGTGTAAACCTTATCACTTAGAGGAAGGTGAAGTCGTAACAAGGTTTCC
1024	a6883d66b8a826cf80ae003277d0d114	OTU_1024	131	353	9	GTCGCATCTACCGATTGAATGGAGAGGCAAAATCTCCGGACCGTGACGCGTGGGGGTCAAACCTCGTGCAGTCGTGGGAAGTGGATTAAACCTTTCTATTTAGAGGAAGGTAAAGTCGTAACAAGGTTTCC
1025	b086304112a3635dcbd9b81c031452cc	OTU_1025	128	352	11	GTCGACTCTACCGATTGAATGGTTCGGTGAAAACTTTGGACTGTGGCATTGTCCTTCATTGGACTTCGCCGTAGGAAATTGTTTAAACCTCATCATTTAGAGGAAGAATAAGTCGTAACAAGGTTTCC
1026	3391fe9845ea7bbb2ba9de253b1379e2	OTU_1026	131	352	10	CGTCGCACCTACCGATTGAATGGTCCGGTGAAATTCTCGGACGCGGACTTGCAATGTTAATTCGGCGCTTGTCTGTGAAAGTTAATTAAACCTTACCATTTAGAGGAAGGTGAAGTCGTAACAAGGTTTCC
1027	e4aab4a11eb48c7c6125d33c0625de9e	OTU_1027	131	352	9	CGTCGCTCCTACCGATTGAGTGGTCCGGTGAATAATTTGGACTGGTGCCTTTTTCGGTTCTCCGAATTAGGCGCCGGGAAATCTAGTGAACCTTATCACTTAGAGGAAGGAGAAGTCGTAACAAGGTTTCC
1028	a30b9248e6d825b19a00b9a1ab5abf81	OTU_1028	110	352	4	GTCACATCATGGAAGCGGATTGCACCCGAAGCCGGTGGTCTAACCTTTTATTAGGAGGAAGCCGTCGAAGGTGTGATTGGTAACTGGGATGAAGTCGTAACAAGGTAGCC
1029	2be463f547bb27f7b5ab6f61587b5604	OTU_1029	136	352	2	GTCGCTACTACCGATTGAATGGTTTAGTGAGATCTCCGGATTGGCACCATCGCGGCTTTGCGGCTGTGACGGAATGCCGAAAAGTTGATCAAACTTGATCATTTAGAGGAAGTAAAAGTCGTAACAAGGTTTCCGT
1030	1a2999671f3ce601396e819ff07de831	OTU_1030	106	351	1	GTCACACCATGGGAGTGGGCTGCACCAGAAGTAGGTAGACTAACCGCGAGGGAGTCGCTTACCACGGTATGGTTCATGACTGGGGTGAAGTCGTAACAAGGTAGCC
1031	4007a3ac3762087054a25ba2152d468d	OTU_1031	131	351	6	CGTCGCACCTACCGATTGAATGATTCGGTGAAAATCTCGGACTGTGACCAGAAAGCCTTCGGGTCTCCAGGTTGTGGGAAGTTATTTAAACCTCATCATTTAGAGGAAGGTGAAGTCGTAACAAGGTTTCC
1032	e81da2d3e4f0a5a737f788e7efd40f8d	OTU_1032	131	351	1	CGTCGCACCTACCGATTGAATGGTCCGGTGAAGCCTCGGGATTGTGACCAGTTCACTTCATTGTGAGTTGGTTGTGAGAACTTGTCTAAACCTTATCATTTAGAGGAAGGTGAAGTCGTAACAAGGTTTCC
1033	1f4ed43f19e6e69d30c58844e3d8cb32	OTU_1033	106	349	5	GTCGTTTCTTCCGACTGATACTCATTGTGAGTTGCAAGGATTCTTAATTGGAGAATTGCTACAAATGCTTTGTATTGGAGGAAGAAAAAGTCGTAACAAGGTTATC
1034	1e79dcb13b46d7067cdc1a9d6d6f6521	OTU_1034	131	349	2	CGTCGCACCTACCGATTGAATGTTTCGGTGAAACTTTCGGACCGCAGTTTTTGGACCCTCGGGTCCTCTGACTGTGGAAAGTTATTTAAACCTCAACATTTAGAGGAAGGTGAAGTCGTAACAAGGTTTCC
1035	eaf3bd7d778741e9e69abd430eb7d692	OTU_1035	128	349	9	GTCGCTCCTACCGATTGAGTGATCCGGTGAATAATTTGGACTGCGCTAGCAGAGAATTTCTACTGCTAGCAGGGGAAATTTCGTGAACCTTATCACTTAGAGGAAGGAAAAGTCGTAACAAGGTTTCC
1036	c46c01eaa69c06866f66734fc2488b6b	OTU_1036	131	349	10	CGTCGCTACTACCGATTGAATGTTTTAGTGAGGTCCTTGGATTGTTTGCCTGGCGGTTAACGCTGCCTGGCTAATGAAAAGACGACCAAACTGTAGCATTTAGAGGAAGTAAAAGTCGTAACAAGGTTTCC
1037	c2a9bdb7f54d2f563c76d81d3fc655ab	OTU_1037	133	349	8	GTCGCACCTACCGATTGAATGCTCCCGTGAGGCTCTTGGACCGCGGTTGACGCTTCCTTCATTGGAGACGTAATTGTGGGAAGTTATCCAAACGTTAGCATTTAGAGGAAGGTGAAGTCGTAACAAGGTTTCC
1038	da65a0d8511c032ba839a6c374a3a829	OTU_1038	128	349	4	GTCGCACCTACCGATTGAGTGGTCCGGTGAAGACTCGGGATTGTGGTTATTGCTTTCATTAGGAATGACCGTGAGAACTTGTCTGAACCTTATCACTTAGAGGAAGGTGAAGTCGTAACAAGGTCTCC
1039	2ee9c164707d7e97593ef67e2b59cec1	OTU_1039	131	348	5	GTCGCTCCTACCGATTGAGTCATCCGGTGAGCAGTTTGGATTGCGAGTGGGTCGTGGCTTGCCACTCCTATTTGCGAGAAGCTCTGCGAACCTTGTGACTTAGAGGAAGGAGAAGTCGTAACAAGGTTTTC
1040	d410456e2a09ad95b1cf92c05af3ab8f	OTU_1040	132	348	9	GTCGCTACTACTGATTGGATGGTTAAGCGAGCAGTCTCAGAACCTCTTTGACAACACTTCGGTGATGTTCATTGAGCGGACGAGGAGCGAGCTTATTTGTCTAGAGGAAGTAAAAGTCGTAACAAGGTTTCC
1041	dea494c82a21ec3d5739089c814d6de8	OTU_1041	131	347	11	CGTCGCTCCTACCGATTGAGTGATCCGGTGAATAATTCGGACCGAAAATTTACTTGGTTCGCCAGGTTTATTTTTGGAAAGTCTAGTGAACCTTATCACTTAGAGGAAGGAGAAGTCGTAACAAGGTTTCC
1042	36448c24cd12ad655d298357eac18472	OTU_1042	131	347	2	CGTCGCACCTACCGATTGAATGGTCCGGTGAAGACTCGGGATTGTGGCCTGGCTCCTTCATTGGGGCCTGGCCGCGAGAACTTGTCTGAACCTTATCATTTAGAGGAAGGTGAAGTCGTAACAAGGTTTCC
1043	b4791251652d0445da412f8413c5d974	OTU_1043	131	347	3	CGTCGCACCTACCGATTGAATGGTCCGGTGAAGCCTCGGGATTGTGACGAGTTCCCTTTATTGGGAGTTTGTTGCGAGAACTTGTCTAAACCTTATCATTTAGAGGAAGGTGAAGTCGTAACAAGGTTTCC
1044	aa376d9b4f918a4167914fe87a3af652	OTU_1044	128	346	6	GTCGCACCTACCGATTGGATGGTCCGGTGAAGCCTCGGGATTGTGACCAGCGCCTTTATTGGTGTCGGTTGCGAGAACTTGTCTAAACCTTATCATCTAGAGGAAGGTGAAGTCGTAACAAGGTTTCC
1045	f4ae5c21d677e21e7a6aeeb17818c257	OTU_1045	123	346	3	GTCGCTACTACCGATTTCGAGTGGTCAGGTGAATCTTTCGGACTGTGGGCGCCCTTGAGGTGTTCGCGGAAAGTCAGGTAAATCTTATCACTTAGAGGAAGTAAAAGTCGTAACAAGGTTTCC
1046	9bd795e2154bd7d652c1e10562f040f9	OTU_1046	132	346	3	GTCGCTCCTACCGATTGAGTGATCCGGTGAATAATTCGGCCTGCCTGACCCATATCTTCTTAGGTACTGGTTGGGTGGAAAGTCTAGTGAACCTTATCACTTAGAGGAAGGAGAAGTCGTAACAAGGTTTCC
1047	5c986e9f13f54f2b6daed45924d8e8d4	OTU_1047	104	346	7	GTCACACCATGGGAGTCTATTGCACCAGAAGTAGGTAGCCTAACGCAAGAGGGCGCTTACCACGGTGTGGTCGATGACTGGGGTGAAGTCGTAACAAGGTAGCC
1048	12047bb0de42e1d15ba48d1c1e2bc6d5	OTU_1048	136	346	2	GTCGCTACTACCGATTGGATGGTTTAGTGAGATCCTCGGATTGGTCCTGGCACGGCGGGCAACCGCCTTGCCATGGCGCCGAGAAGACGATCGAACTTGATCATCTAGAGGAAGTAAAAGTCGTAACAAGGTTTCC
1049	6693e64644e1c865e05ae61546029e60	OTU_1049	104	346	3	GTCGTTTCTTCCGACTGATACAAATTGTGAGTTGCAAGGACCTTTCTTGGAAATTGCCGCGAATGCTTCGTATTGGAGGAAGAAAAAGTCGTAACAAGGTTATC
1050	e009751183ee6978e49978bf95793b61	OTU_1050	127	345	2	GTCGCTCCTACCGATTGAGTGATCCGGTGAATACTTCGGAGTGCAGACTCTACAGTTCCTGTTTTGTTTGCGCAAAGTTGAATAAACCTTATCACTTAGAGGAAGGAGAAGTCGTAACAAGGTTTCC
1051	e33e08716073afa41df20f4fb6aa193b	OTU_1051	224	345	1	GTCGCACCTACCGATTGAATGGTCCGGTGAAGCCTCGGGATTGTGACCAGTTTGCTTTATTGTGAGTTGGTCGCGAGAACTTGTCTAAACCTTATCATTTAGAGGAAGGTGAAGTCGTAACAAGGTTTCCGTAGGTACGTTGAGGCATTGCTAGCGCGACACTAAGATATTATTTCAATTTGTGCATTTTGCTGACATAATTTGTTATTCAATCTCTGTATTTT
1052	65b80072dc1c82eaacffdd5bf12ac66d	OTU_1052	131	343	1	CCGTCGCTCCTACCGATTGAGTGATCCGGTGAATAATTCGGATTGCAGCAGTGTTCAGTTCCTGAACGTTGCAGCGAAAAGTTTAGTGAACCTTATCACTTAGAGGAAGGAGAAGTCGTAACAAGGTTTCC
1053	96d7c2dcbe841c22367fbd8eae699e13	OTU_1053	106	343	8	GTCACATCACGAAAGCCAGGTGTACTAGAAGTCGCCGGCCCAACCTTCGGGAGGGAGGCGCCGACGGTGTGCTTGGTGATTGGGGTGAAGTCGTAACAAGGTAGCT
1054	84d3717a55c961164daf5e6a948d42c9	OTU_1054	131	342	3	CGTCGCTCCTACCGATTGAGTGATCCGGTGAGTAATTCGGACCGCGTAAACGTGGCCTTTGGTTACTGTTTATGTGGGAAGTTTCGCGAACCTTATCACTTAGAGGAAGGAGAAGTCGTAACAAGGTTTCC
1055	467d7c778a65fe8bfe9d2ce97c1bce6f	OTU_1055	131	341	5	CGTCGCACCTACCGATTGAATGGTCCGGTGAAGCCTCGGGATTGTGGTTGGTTTCCTTGATTGGAAGTTAGTCGCGAAAACTTGTCTGAACCTTATCATTTAGAGGAAGGTGAAGTCGTAACAAGGTTTCC
1056	f87dcc78a0e6e82cea57e3dfaf7205cd	OTU_1056	131	341	1	CCGTCGCTCTTACCGATGGACTTTTCTGTGAGTTTGAGGGACTTGCGCTCTGTTACCCTCGGGTCATTGCGCTATGGAAACTTAAACGAACAGTGTGGTCTAAAGGAAAGAGAAGTCGTAACAAGGCATCT
1057	7979531ebc62884481bbe5c9e6cfd02a	OTU_1057	115	340	1	GTCGCTCCTACCGATTTTGAGTGGTCCGGTGAACCTTCTGAATCGCGCGGTCTCCGCGTGAGAAGTTATGTAAACCTTATCACTTAGAGGAAGGAGAAGTCGTAACAAGGTTTCC
1058	428319cf30633c458dbcc8f4b237575f	OTU_1058	131	340	3	CGTCGCTCCTACCGATTGAATGGTCCGGTGAAGCCTCGAGATTGTGGTTAGTTTCCTTTATTGGATGTTAGCCGCGAGAACTTGTCTAAACCTTATCATTTAGAGGAAGGCGAAGTCGTAACAAGGTTTCC
1059	59e6a500d60807c1ac64b10f8b4efc9d	OTU_1059	101	339	4	GTCGTTTCTTCCGACTGATATTCAATGTGAATTGCGAGGAGTTCTTCAAATCGCCGTGAACATTGAATATTGGAGGAAGAAAAAGTCGTAACAAGGTTGCT
1060	d18eea6cc747a3110862f10b30bbba84	OTU_1060	131	339	4	CCGTCGCTCCTACCGATTGAGTGATCCGGTGAATAATTTGGACTGATAAGATAAGCCTTGAGGTTTTGTCTTGTCGGGAAGTTTCGTAAACCTTATCACTTAGAGGAAGGAGAAGTCGTAACAAGGTTTCC
1061	9d8ee9c7ee361073b0ced2079e2236a9	OTU_1061	128	339	6	GTCGCTCCTACCGATTGAGTGATCCGGTGAATAATTCGGACGAGAATTTGGGGTAGTTTTACTCCTTATTCTTGAAAGTCTAGTGAACCTTATCACTTAGAGGAAGGAGAAGTCGTAACAAGGTTTCC
1062	d4aa9aae647e9f61e28e33fc19fbcb34	OTU_1062	127	339	12	GTCGCTCCTACCGATTGAATGATCCGGTGAATACTTGGGACCGTGTCGCGTCCAGATTCTGGTTGCGATGTGGGAACTTGAGTGAACCTTATCATTTAGAGGAAGGAGAAGTCGTAACAAGGTTTCC
1063	eef33e7bfbc34bb0186251b4b37bde04	OTU_1063	138	339	1	GTCGCTACTACCGATTGGAAGTTTCAGTGAGGCATCTGGACCTGCTAGCCATGCGATGGGGCAACCCATCCGAGGATAGGCGGGGAAGTTTGTCGAACTCAAATTTCTAGAGGAAGTAAAAGTCGTAACAAGGTTTCC
1064	9848abc773d83b309d682fc186e4a4ef	OTU_1064	106	339	5	GTCACACCATGGGAGTTGACATTGGCAGAATACGTTGAGCTAACCTTCGGGGAGCAGACGTGCAAGCTAGTGTTGATGACTGGGGTGAAGTCGTAACAAGGTAGCA
1065	f7076d0e4cca41e26fe0f32ca66512d4	OTU_1065	104	338	8	GTCACACCATGGGAGTGGGTTGCACCAGAAGTGGCTAGTCTAACTTCGGAGGACGGTCACCACGGTGTGATTCATGACTGGGGTGAAGTCGTAACAAGGTAACC
1066	0ed86b0672f78ec9df3841690433b434	OTU_1066	131	338	12	CGTCGCACCTACCGATTGAATGACTCGGTGAAATCCCCGGACTGCAGCCTTGACACCCTCGGGTGACTCGGCAGTGGAAAGCGGATTAAACCTCGCCATTTAGAGGAAGGTGAAGTCGTAACAAGGTTTCC
1067	450c49d4920ca0d459dfb0d7bb8879f6	OTU_1067	136	338	2	GTCGCTACTACCGATTGGATGGTTTAATGAGATCTTCGGATTGGAGCCGTCGTGGCCGGCAACGGTCGTGTCGGAGGCCGAGAAGCTGCTCTAATTTGATCATCTAGAGGAAGTAAAAGTCGTAACAAGGTTTCCG
1068	44c5d3236fe6da7bde2eb961709070ea	OTU_1068	139	338	2	GTCGCTCCTACCGATTGAATGATCCGGTGAAAACTATGGATGGAGTGGGCAAGAGTGGTTTCTAACCATATTCTTCCTATTTCCAGAAGTGGTTTGAACCTTACCATTTAGAGGAAGGAGAAGTCGTAACAAGGTTTCC
1069	f854a57ffff4323b005bac99855c6fba	OTU_1069	136	337	14	GTCGCACCTACCGATTGAATGGTCCGGTGAAATCTTTGGACCGTGACTTTGTTTTGCTTTCGGGCAAGACGTTGTTGTGGGAAGTTGATTAAACCTTATCATTTAGAGGAAGGTGAAGTCGTAACAAGGTTTCCGT
1070	be1a847c5d0b775ce709a30525d8457f	OTU_1070	106	337	13	GTCACACCATGGGAATTGGTTTTACCTGAAGACTGTGTGCCAACCGCAAGGAGGCAGCAGGCCACGGTAAGATCAGTGACTGGGGTGAAGTCGTAACAAGGTAGCC
1071	2c77c7af23fd65b9677369c4c8e2b03a	OTU_1071	131	337	6	CGTCGCACCTACCGATTGAATGGTCCGGTGAAATTTCGGGACTGATCGTTTGGTGGTTCATTCTGCCTTACGATCGGGAACTTACTTAAACCTTATCATTTAGAGGAAGGTGAAGTCGTAACAAGGTTTCC
1072	211d90bd86a40f0923c4f09081dda732	OTU_1072	127	337	16	GTCGCTCCTACCGATTGAGCAATCCGGTGAATATTTCGGACCTACTGGCTCAGGGCAACCTGTTGCTAGTGGGAAAGTCAAGTAAACCTTATTGCTTAGAGGAAGGAGAAGTCGTAACAAGGTTTCC
1073	d49582a444a473a9293736a0a2a22aa7	OTU_1073	122	337	7	GTCGCTCCTACCGATTGAGTGATCCGGTGAATAATTCGGACTGCGACGTCTCAGCTGATTCGTTGCGGGAAGTTTAGTGAACCTTATCACTTAGAGGAAGGAGAAGTCGTAACAAGGTTTCC
1074	d376175c43664c9cdbe0b6d46a3e7601	OTU_1074	131	336	1	CGTCGCACCTACCGATTGAATGATCCGGTGAAACCTCGGGATTATGGTTTGATTCCTTCATTGGAAATTGACTGTGAGAACTTGTTTAAACCTTATCATTTAGAGGAAGGTGAAGTCGTAACAAGGTTTCC
1075	8c4fdde9253a8e6b5798155c8f773afc	OTU_1075	128	336	3	GTCGCACCTACCGATTGAATGGTCCGGTGAAGCCTCGAGATTGTGACTGTCGCCTTTATTGGTGTCGGTCACGAGAACTTGTCTAAACCTTATCATTTAGAGGAAGGTGAAGTCGTAACAAGGTTTCT
1076	d7f71b8b984df01d765bbd1acf9cbf0d	OTU_1076	106	336	1	GTCACACCATGAGAGTTGGTTTTATCTTAAGTCAGTGCGCTAACCTTCGGGAGGCAGCTGCCCACGGTACGGCCAGCGATTGGGGTGAAGTCGTAACAAGGCAGCC
1077	f18ae287a85fa3c7381fa82b7f4f28dc	OTU_1077	108	334	4	GTCACATCACGAAAGTCGGCTGTACCGGAAGTTGGTGAGCCAACCCTTCGGGGAGGCAACTACCCATGGTGTGGTCGGCGATTGGGGTGAAGTCGTAACAAGGTAGCT
1078	3d1fcf8406b55fea9963f6844be5a9df	OTU_1078	128	334	4	GTCGCTCCTACCGATTGGATGGTCCGGTGAGCTATTTGGACTGCTGACTTTTCAGTTCTCTGAGTTGACAGTGGAAAATCTCGCAAACCTTATCATCTAGAGGAAGGAGAAGTCGTAACAAGGTTTCC
1079	a440a529c1c4d18a7abb0c9bf77fbb04	OTU_1079	124	334	10	GTCGCTCCTACCGATTGAGTGCTCCGGTGAACAATTTGGACTGCTTTGATTCGATTAGAATTTGAAGCGGAAAGTTTAGTGAACCTTATCACTTAGAGGAAGGAGAAGTCGTAACAAGGTTTCC
1080	ae3a8558d7b23f54929a581626d46fab	OTU_1080	131	334	2	CGCCGTTGCTACCGATGATGTGAAGATAGAGACGTTGGGAGAGGCCGATCAACAACCCTCGGGCTTTGGTCAGCTTCGAACTTCTCCGATATCTCCATATTAGAGGAAGCAAAAGTCGTAACAAGGTAGCT
1081	e93e4dccde3ab3c36a3f0ce0c935b950	OTU_1081	106	333	11	GTCACACCATGGGAGTTGGTTCTACCCGACGGCCGTGCGCTAACCTTATGGAGGCAGCGGACCACGGTAGGATCAGCGACTGGGGTGAAGTCGTAACAAGGTAGCC
1082	1b73455746bacf2832dc3036de722aa2	OTU_1082	131	333	7	GTCGCTACTACCGATTGGATGGTCTGGTGAGTCTTCCGGACTGCGACTATGTTTCGGGCAACCGGGACTTGTTGCGGGAAGTTACGCAAACCCTATCATCTAGAGGAAGTAAAAGTCGTAACAAGGTTTCC
1083	ea30bc8658d8a4ae6e4cc13436213119	OTU_1083	131	333	10	GTCGCATCTACCGATTGAATGGAGAGGCAAAATCTTCGGACCGTGACGCTTGGGAGTCAAATCTCGGGCTGTCGTGGGAAGTGGATTAAACCTTTCTATTTAGAGGAAGGTAAAGTCGTAACAAGGTTTCC
1084	bacee42c67e25ce4c5feb5e9a08e7c8d	OTU_1084	128	333	1	GTCGCACCTACCGATTGAATGATTCGATGAATTTTTCGGACTGTGATCAGGACGCTTCGGCGACTTGGTTGTGGGAAGTTATTTAAATCTCATCATTTAGAGGAAGGTGAAGTCGTAACAAGGTTTCC
1085	11d14eff7102fe26f0c11e5e4e131360	OTU_1085	133	332	6	GTCGCTCCTACCGATTGAATGATCCGGTGAGCTTTTTGGACCTTAGCAACGGCTTTGGTTCGCCAAACTGATGCTGGGGGAAGATACGCAAACCTTATCATTTAGAGGAAGGAGAAGTCGTAACAAGGTTTCC
1086	79caf4b9599a9b76502dbcf6d3597f2e	OTU_1086	131	332	4	CGTCGCTACTACTGATTGGGTGTTCAAGTGAGATGCTTAGACCCTTGTTGTATGGTTCATTATTGTGCTTCGAAAGGAAAAAGTTTCAAGCTTGAGTGTCTAGAGGAAGTAAAAGTCGTAACAAGGTTTCC
1087	0d73b74cfd4aeea9fcebef15b51cae0f	OTU_1087	131	332	7	GTCGCTACTACCGATTGGATGGTCTGGTGAGTCATTCGGACTGCGGCTCTAGTTCGGGCAACCGGGCTTTGCTGCGGGAAGTTTCGCAAACCCTATCATCTAGAGGAAGTAAAAGTCGTAACAAGGTTTCC
1088	9de3eb2279035e56577bceb3055bf4a5	OTU_1088	126	332	2	GTCGCTCCTACCGATTGAGTGATCCGGTGAATAATTCGGACTGAACTACACTAAGAAATTAGTGTTTTTCGGAAAGTTTAGTGAACCTTATCACTTAGAGGAAGGAGAAGTCGTAACAAGGTTTCC
1089	06e8cca44e9c22987ceb2cb5578b3dc9	OTU_1089	132	332	1	GTCGCTACTACCGATTGAATGGCTTAGTGAGGCCTCCGGATTGGTTTAAAGAAGGGGGCAACTCCATCTTGGAACTGAAAAGCTGGTCAAACTTGGTCATTTAGAGGAAGTAAAAGTCGTAACAAGGTTTCC
1090	91acd5c25377ab6b2a1f183d2feda24e	OTU_1090	136	332	2	GTCGCTACTACCGATTGAATGGTTTAGTGAGATCTTCGGATTGGTGCCCTGGGGAGCAGCGATGCTTCCTTGGGATTTCGAGAAGTTGCTCTAACTGAATTATTTAGAGGAAGTAAAAGTCGTAACAAGGTTTCCG
1091	831a64441179013e82f38c0cc819be58	OTU_1091	131	331	8	CCGTCGCTCCTACTGATTGAGTGATCCGGTGAATATTTTGGACTGCAGCATAGCTTGGTTCCCAAGTGTTGCAGCATAAAGTTTAGTGAACCTTATCACTTAGAGGAAGGAGAAGTCGTAACAAGGTTTCC
1092	e9b4e56f5d2da0e848f85a4fcc76a3f2	OTU_1092	131	331	12	GTCGCTACTACTGATTGGATGTTTAAGCGAGGTTCTCGAACTGCTAGCGACTTAGCTTCGGTGAGGTCGCAGTGTGGGAAGTGAACCTAGCTTTGGTGTCTAGAGGAAGTAAAAGTCGTAACAAGGTTTCC
1093	fb753bee3f16eb70f75ae61c899e2aef	OTU_1093	128	331	5	GTCGCTCCTACCGATTGAATGAACCGGTGAATAATCCGGATTGCGAGTAGTTTCAGCTTTGGAACTGTTCACGAGAAGTTTAGTGAACCTTTTCATTTAGAGGAAGGAGAAGTCGTAACAAGGTTTCC
1094	c94fc7ad595c17b67f8b0c4fd8e0689a	OTU_1094	132	331	5	GTCGCACCTACCGATTGAATGGTCCGGTGAAGGCTCCGGAGGCGTCTTTCTCAATGTTTATTCGGCGAGATTGGTGCCAAAGTTGAATGAACCTTACCATTTAGAGGAAGGTGAAGTCGTAACAAGGTTTCC
1095	9d23798e19cd03003bb61ceedad137a7	OTU_1095	125	329	4	GTCGCTCCTACCGATTGAATGATCCGGTGAGCAGTCCGGACCGAAGCGTGGCCCTCGGGTACATGCAGCGGAAAGTTCTGCAAACCTTATCATTTAGAGGAAGGAGAAGTCGTAACAAGGTTTCC
1096	25b324e67f4bb99d81c491baaa1ff112	OTU_1096	132	329	2	GTCGCTACTACCGATTGAATGGTTTAGCGAGATTCTCGGATTGGGCCCTGTTCGTGCGCAAGCATGGACGAGGTCTGAAAAGAAGTTCAAGCTTGATCATTTAGAGGAAGTAAAAGTCGTAACAAGGTTTTC
1097	2bef9f5d75e21c1b39472d2c95a4af7c	OTU_1097	127	328	6	GTCGCTCCTACCGATTGAGTGATCCGGTGAGTCCTTTAGAGTGTGTTGCATGTAGTTTCTACTCGTGACGCGTGAAGTTGAACAAACCTTATCACTTAGAGGAAGGAGAAGTCGTAACAAGGTTTCC
1098	4d626f87662898692a303639fe648703	OTU_1098	131	328	5	CGTCGCACCTACCGATTGAATGGTCCGATGAAGCCTCGGGATTGTGGTTTGTTTCCTTTATTGGAAGCTGACCGTGAGAACTTGTCTAAATCTTATCATTTAGAGGAAGGTGAAGTCGTAACAAGGTTTCC
1099	36ea7f1774de5a5f3f0b888250294454	OTU_1099	132	327	3	GTCGCACCTACCGATTGAATGATTCGGTGAAAATTTCGGACTGTGCCACTGTACCCTTCATTGGGCGTAGTGATATGGGAAGTTATTTAAACCTCATCATTTAGAGGAAGGTGAAGTCGTAACAAGGTTTCC
1100	07e07e234fc00859887b97c39c1047bd	OTU_1100	136	327	2	GTCGCTACTACCGATTGAATGGTTTAGTGAGGTCCTCGGATTGGCGCTACCGGAATGGGCAACCGTTCTAGTAAGTGCTGAGAAGACGATCGAACTTGATCATTTAGAGGAAGTAAAAGTCGTAACAAGGTTTCCG
1101	018666091db05d5d28e8882b65948338	OTU_1101	131	327	1	CCGTCGCTTCTACCGATTGAATGATCCGGTGAATAATTTGGACTGCAGCAATGCTTGGATCCCGAATGTTGCAGCGGAAAGTTTAGTGAGCCTTATCACTTAGAGGAAGGAGAAGTCGTAACAAGGTTTCC
1102	409cb966a8c1ab5e334f715a9de5450f	OTU_1102	131	326	13	CGTCGCTCCTACCGATTGGCTGATCCGGTGAATAATTCGGACCGACGTCTTAAGTGGTTCGCCGCTTCTGATGTTGGAAAGTCTAGTAAACCTTATCAGCTAGAGGAAGGAGAAGTCGTAACAAGGTTTCC
1103	1f894c655cfe7f9efda04c88ffb8f8c1	OTU_1103	131	326	8	CGTCGCACCTACCGATTGAATGGTCCGGTGAAATTCTCGGACGACGCCAGGGAATGTTAATTCGGCACCTGGTGTTGAAAGTTAATTAAACCTTACCATTTAGAGGAAGGTGAAGTCGTAACAAGGTTTCC
1104	9766acb6c3480652c313bc6dce6378d9	OTU_1104	138	326	1	GTCGCTACTACCGATTGGGCGACTTAGTGAGCGCCTCGGATTGGACCCGGAACGACCGGCAACGACCGTACCGCTGTGTGCCGAAAAGACGCGCAAACTTGATCGCCTAGAGGAAGTAAAAGTCGTAACAAGGTTTCC
1105	ec1a8046801a284d67bfe963dab13cfa	OTU_1105	132	325	1	GTCGCTACTACCGATTGAATGGCTTAGTGAGCCCTTGGGAGTGGTCTAATTGAGCTGGTAACGGCACAATTGGACTGTAAACTTGGGCAAACTTGGTCATTTAGAGGAAGTAAAAGTCGTAACAAGGTTTCC
1106	92170278ab4384bc4005f0b50a0912fd	OTU_1106	136	325	9	GTCGCTACTACCGATTGAATGGTTTAGTGAGGTCCTCCGATTGGACCCGGCGCGGTCGGCAACGGCCGCGCCGGCGTCCGAGAAGACGATCTAACTTGATCATTTAGAGGAAGTAAAAGTCGTAACAAGGTTTCCG
1107	e9631f20eef544ba497a32e3571ce157	OTU_1107	132	323	2	GTCGCTACTACCGATTGAATGGCTTAGTGAGGTCTTGGGATTGGCTTCGGGGAGCCGGCAACGGCACCCTGTCGCTGAGAACTTGATCAAACTTGGTCATTTAGAGGAAGTAAAAGTCGTAACAAGGTTTCC
1108	663cafef91e56ab96bcc1c9a3a53af0f	OTU_1108	132	323	3	GTCGCTACTACCGATTGAATGGTTTAGCGAGAACCTCGGATTGAACCCATGCCGTGCGCAAGCATGGCGCGGGTTTGAAAAGAAGTTCAAGCTTGATCATTTAGAGGAAGTAAAAGTCGTAACAAGGTTTTC
1109	64dfc43860d602fcb3099085269e4b7d	OTU_1109	127	323	4	GTCGCTCCTACCGATTGGGTGATCCGGTGAATACTTTGGACTACAGTGACAAGGTGTACCTTAGTTACTGTAGGAAATTGCGTGAACCTTATCACTTAGAGGAAGGAGAAGTCGTAACAAGGTTTCC
1110	e2de91d4b99cac80c372a5623c374f77	OTU_1110	128	323	7	GTCGCTCCTACCGATTGGATGAGTTGGTGAGTTAATCGGATTGCGCCGCAGTGCTTTCGGGCTCTGCGATGCGAGAAAATTTGCAAACTGGACTATCTAGAGGAAGGAGAAGTCGTAACAAGGTTTCC
1111	f5353b62d456608fe7d99445844bcfad	OTU_1111	106	323	1	GTCACACCATGGGAGTGGATTGCACCAGAAGTGGTTAGTCTAACCTTCGGGAGGACGATCACCACGGTGTGGTTCATGACTGGGGTGAAGTCGTAACAAGGTAGCC
1112	aa09b7d0a15b36ffa08f361853c6707c	OTU_1112	128	323	6	GTCGCTCCTACCGATTGAGTGATCCGGTGAATAATTCGGACTGCAGCAGTGTTCGGTCACGAACGTTGCAGCGGAAAGTTTAGTGAACCTTATCACTTAGAGGAAGGAGAAGTCGTAACAAGGTTTCC
1113	025bf621825b8fc44c30c733fbb5988a	OTU_1113	136	322	1	GTCGCTCCTACCGATTGAATGTTAAGGCGAACACTCCGGAATCGTGGCCTTGATTGGGCAACCTTTCTTGACCTATCGATGAAGTTGTGTAAGCCTTGACATTTAGAGGAAGGAAAAGTCGTAACAAGGTTTCCGT
1114	3196bbc8e911da9f1a2f62c2bcaff4da	OTU_1114	131	322	2	CGTCGCACCTACCGATTGAATGGTCCGGTGAAGCCTCGAGATTGTGGCTAGTTCCCTTTATTGGGAGTTAGTTGCGAGAACTTGTCTAAACCTTATCATTTAGAGGAAGGTGAAGTCGTAACAAGGTTTCC
1115	3b066f9aeaaa4008a4541143b1d4a41f	OTU_1115	136	322	3	GTCGCTCCTACCGATTGAATGATCCGGTGAAATGTTCGGATCGCGGCGACGTGGGCGGTTCGCTGCCCGCGACGTCGCGAGAAGTCCATTGAACCTTATCATTTAGAGGAAGGAGAAGTCGTAACAAGGTTTCCGT
1116	3fad2a74bc210c907d36f704687a6c59	OTU_1116	128	321	1	GTCGCACCTACCGATTGAATGACTCGGTGAAAAAGTGGGACTAGTGGCTAGCGCTTCATTGCGCGACCCATGGGAAACGTTTTTGAACCTCGTCATTTAGAGGAAGGTGAAGTCGTAACAAGGTTTCC
1117	13bef8f048884da42be588276f45bfa2	OTU_1117	121	320	6	GTCGCTCCTACCGATTTCGAGTGGTCCGGTGAACCTTTCGGACAGAGAGAGTCTCGTACAATCTCTGAAAGTCAAGTAAACCACATCACTTAGAGGAAGGAGAAGTCGTAACAAGGTTTCC
1118	5206da664f4388564f95116d7ceeffd7	OTU_1118	131	320	8	CCGTCGCTCCTACTGATTGAGTGATCCGGTGAATATTTTGGACTGCAGCATAGCTTAGTTCCTGAGTGTTGCAGCATAAAGTTTAGTGAACCTTATCACTTAGAGGAAGGAGAAGTCGTAACAAGGTTTCC
1119	8bd8d9df8cbb58379140140c6f3f7f1b	OTU_1119	136	320	2	GTCGCACCTACCGATTGAATGGTCCGGTGAAATCCTTGGACCGCGATATTGTCTTACTTCCGGGTGAGACGCTGTCATGGGAAGTGGATTAAACCTTATCATTTAGAGGAAGGTGAAGTCGTAACAAGGTTTCCGT
1120	1e4101a2cc5e813c830151e9c2c8810e	OTU_1120	106	319	8	GTCACACCACGAAAGTTGAATTGACCCGAAGTCGTGTGCCTAACCTTTTGGAGGGAAGCGCCTACGGTTGGTTCGATGATTGGGGTGAAGTCGTAACAAGGTAGCT
1121	28b0d82f2c88a20bb8fd962444928c76	OTU_1121	141	319	6	GTCGCACCTACCGATTGAATTTCTAGGTGAAAACTTGGGACGTTGTTTTGCCGAGAAATCTTCGGGTTTCTATGTTGCATTACGATGAAACTTGTTTAAACCTTGCAATTTAGAGGAAGGTGAAGTCGTAACAAGGTTTCC
1122	5969968add1f9e800fc4848c3cd64dbd	OTU_1122	131	319	7	GTCGCTACTACCGATTGGATGGTCTGGTGAGTCTTTCGGACTGCGGCTCTAGCTCGGGCAACCGGGTTTTGCTGCGGGAAGTTACGCAAACCCTATCATCTAGAGGAAGTAAAAGTCGTAACAAGGTTTCC
1123	65d4ce7aad4ebefde512cdd9a790c602	OTU_1123	131	318	3	CGTCGCACCTACCGATTGAATGGTCCGGTGAAGCCTCGGGATTGTAGTCAGGTTGCTTTATTGGAATCTGATTGTGAGAACCTGTCTAAACCTTATCATTTAGAGGAAGGTGAAGTCGTAACAAGGTTTCC
1124	7adbb2f43e72b135db707b3515503c3c	OTU_1124	131	318	2	GTCGCTACTACCGATTGAACGTTTTAGTGAGGTATTTGGATTGGGCCTCGGGAGGTTTGCGCCTCCCTTGTGTCCGAGAAGACTCCCAAACTTGAGCGTTTAGAGGAAGTAAAAGTCGTAACAAGGTTTCC
1125	cecab0d8cc3659a79a52c2854dec70aa	OTU_1125	108	317	2	GTCAAGCCACGAAAGTTGGGAGGGCCCGAAGTCGCCAAGCTAACCCTCACGGGAGGCAGGCGCCGAAGGTCAGCTCGACAATTGGGACTAAGTCGTAACAAGGTAGCC
1126	bec71617b2cadb02fb39a554bf03580d	OTU_1126	128	317	3	GTCGCTCCTACCGATTGGGTGATCCGGTGAATACTTTGGACTATAGCGTTAAGGGTTAGCCCTTACTGCTGTAGGAAATTGCGTGAACCTTATCACTTAGAGGAAGGAGAAGTCGTAACAAGGTTTCC
1127	16932c249c53009650329c52a3a45627	OTU_1127	133	317	11	GTCGCACCTACCGATTGAATGACTCGGTGAGAAATTGGGACCGTGAGATTGTCCTCCTTCATTGGAGGCGTTTTCGTGGGAACTTTTTCAAACCTCGTCATTTAGAGGAAGGTGAAGTCGTAACAAGGTTTCC
1128	34e10c2f5029ba739003a5790eda42bc	OTU_1128	131	317	3	GTCGCTCCTACCGATTGAGTGGTCCGGTGAGGCTTTGGGATCGCGATGGAGGGAGCGTTTCGCTCGCTCCGTTGTGAGAACTCAGTCGAACCTTATCATTTAGAGGAAGGAGAAGTCGTAACAAGGTTTCC
1129	b64a858ab13b09d03b0d33c06b071fa1	OTU_1129	158	316	2	GTCGCTACTACCGATTGAATGATTTAGTGAGGCCTTCGGACTGGCGCCCTTGGATGCCAAAGGGAGTTCCCTTCGGGGTTCTCTTCGGCGCCTCGGGCTGACGGAAAGATGTCCAAACTTGATCATTTAGAGGAAGTAAAAGTCGTAACAAGGTTTCC
1130	396fd4ad4efdb4dfedfc0c3e0ba4c528	OTU_1130	131	316	8	CGTCGCACCTACCGATTGAATGGTCCGGTGAAGCCTCGGGATTGTGGTCAGATTGCTTTATTGGAGTCTGACTGTGAGAACTTGTCTAAACCTTATCATTTAGAGGAAGGTGAAGTCGTAACAAGGTTTCC
1131	49139fefa6dd8ff05c25f3c05248becf	OTU_1131	127	316	2	GTCGCTACTACCGATTGAATGGTTTAGTGAGATCATCGGATCGGCCGTGTCGGTCTCACCGTTCACGCGCCGAAAAGACGCTCAAACTTGATCATTTAGAGGAAGTAAAAGTCGTAACAAGGTTTCC
1132	6cd7d0f29e06c9e5126cc44753238f0d	OTU_1132	125	315	6	GTCGCTCCTACCGATTGAATGATCCGGTGAGCAGTCCGGACCGAAGCTTGGCCCTCGGGTTCGAGCAGCGGAAAGTTCTGCAAACCTTATCATTTAGAGGAAGGAGAAGTCGTAACAAGGTTTCC
1133	4844f07b57ee99fbcb2878a939db6999	OTU_1133	131	314	1	CCGTCGCACCTACCGATTGAATGGTCTGGTGAACCGTCCGGACTTTGAGAGATTTCCTTTATTGGAGGCTCACAAGGGAAGTTCTGTAAACCCTACCATTTAGAGGAAGGTGAAGTCGTAACAAGGTTTCC
1134	798a66797c8af7eb5185e74697b9b4d9	OTU_1134	132	314	1	GTCGCTACTACCGATTGGACGTTTTAGTGAGGATTTTGGACTGGACCGCTGAAGGCTCACGTTTTCGGTGCCGTTCGGGAAGATCTCCAAACTTGAGCGTTTAGAGGAAGTAAAAGTCGTAACAAGGTTTCC
1135	2fbde2bcc8d4a5639bfd17505e44874e	OTU_1135	132	314	13	GTCGCTCCTACCGATTGAATGATCCGGTGAAATCTCAGGACTGGTGAGTGGCGTTGGTTCGCCAATGTTGCTCGTCGGGAATTTGCTTAAACCTTATCATTTAGAGGAAGGAGAAGTCGTAACAAGGTTTCC
1136	6d9271fcb53713bfc89aca885d53ba69	OTU_1136	106	313	1	GTCACACCATGGGAGTTGGCTTTACCCGAAGACGGTGCGCTAACCGCAAGGAGGCAGCCGGCCACGGTAAGGTCAGCGACTGGGGTGAAGTCGTAACAAGGTAGCC
1137	f856c7808180ddfbc6a4069cd493a70e	OTU_1137	122	313	3	GTCGCTCCTACCGATTGGGTGATCCGGTAAATAATTCGGACCGGCGAGTCCTTCGGGATCTTTGCTGGGAAGTTTAGTGAACCTTATCACCTAGAGGAAGGAGAAGTCGTAACAAGGTTTCC
1138	fb542a5d96b4f37d43dcf08c8cd3a26d	OTU_1138	105	313	6	GTCGTTTCTTCCGACTGATACTCATTGTGAGTTGCAAAGATTCTCTTTGAAAAATTGCTGCGAATGCTTTGTATTGGAGGAAGAAAAAGTCGTAACAAGGTTATC
1139	07793941b668dbfe9c576296eb8458f3	OTU_1139	131	313	1	CCGTCGCTACTACCGATTGAACGGTTTGATGAGTTCCGAGGATGAGAGGCTTCAGGGCATTGTCCTGTAGTATTTCAGAGCAGGTGCAAATCTGATCGTTTAGAGGAAGTAAAAGTCGTAACAAGGTTTCC
1140	b8d8ef502008971086fd9c07e75c1787	OTU_1140	136	312	1	GTCGCTCCTACCGATTGAATGGTCCGGTGAAGTGTTCGGATCGCGGCGACGAAGGTGGTTCGCCGCCTTCGACATCGTGAGAAGTCCATTGAACCTTATCATTTAGAGGAAGGAGAAGTCGTAACAAGGTTTCCGT
1141	a00069149ed1c3ac7e5433875642b33c	OTU_1141	136	312	2	GTCGCTACTACCGATTGAATGGTTCAGTGAGATAATCGGACAGGTAACTTGGTAACTGTTAAAAGTTACCGAGCATATTTGGAAGACGATCAAACTTAGTCATTTAGAGGAAGTAAAAGTCGTAACAAGGTTTCCG
1142	4176e30ec0a1b69b5711d156778d337a	OTU_1142	131	312	5	CGTCGCTACTACTGATTGGGTGTTCAAGTGAGATGCTTAGACCCTTGTTTCATGGTTCATTATTGTGTTTCGAAAGGAAAAAGTTTCAAGCTTGAGTGTCTAGAGGAAGTAAAAGTCGTAACAAGGTTTCC
1143	7e3bc8f25cf68c7669435407af0c1c0c	OTU_1143	108	312	1	GTCACATCACGAAAGCTGGCTGTACTAGAAGTCGCTGCGCTGACCCTTCGGGGAGGCAAGCGCCCACGGTATGGTTAGTGATTGGGGTGAAGTCGTAACAAGGTAGCT
1144	d9876c0832ce7ec79de4f629d04169f7	OTU_1144	133	311	3	GTCGCTACTACCGATTGAACGTTTTAGTGAGGTATTTGGACTGAGCCTTTGGAGGTTTCTAATCTCCGATGTTGCTCGGGAAGACTCCCAAACTTGAGCGTTTAGAGGAAGTAAAAGTCGTAACAAGGTTTCC
1145	ba78d9172c03d8970bb68dfe3a4d4bce	OTU_1145	104	311	2	GTCGTTTCTTCCGACTGATACTCATTGTGAGTTGCAAGGATCCGTATGGAAAATTGCTGCGAATGCTTTGTATTGGAGGAAGAAAAAGTCGTAACAAGGTTATC
1146	33c2a5db319f3294e765725493385d25	OTU_1146	136	311	2	GTCGCTACTACCGATTGGATGGTTTAGTGAGATCCTTGGATTGGTCCTGGCGTGGCGGGTCACCGCCGTGCCAGTGTGCCGAGAAGACGATCGAACTTGATCATCTAGAGGAAGTAAAAGTCGTAACAAGGTTTCC
1147	e60cef71882df26cab03b68c422287cd	OTU_1147	138	310	2	GTCGCTACTACCGATTGGGCGATTTAGTGAGCGCCTCGGATTGGACCCGGAACGATCGGCAACGACCGTACCGCTGTGTGCCGAAAAGGCGCGCAAACTTGATCGCCTAGAGGAAGTAAAAGTCGTAACAAGGTTTCC
1148	71c53ecdfd395a0bb6fffe790c109616	OTU_1148	132	310	2	GTCGCTCCTACCGATTGGATGGTCCGGTGAAGTTTTCGGACGACGACGGTTTTGGGTTCTGCCCATGCCTGTCTGTCGGAAGTCACCTAAACCTTACCATCTAGAGGAAGGAGAAGTCGTAACAAGGTTTCC
1149	57b443088f10613a15a83d9cf1ec713d	OTU_1149	131	310	12	CGTCGCTCCTACCGATTGAGTGATCCGGTGAATAATTCGGACCAGGATTCGCATGAGTTCGCTCACGCAAATCCCGGAAAGTCTAGTGAGCCTTATCACTTAGAGGAAGGAGAAGTCGTAACAAGGTTTCC
1150	d2194c1a98918c2ccfa9b726f08d7ca5	OTU_1150	138	310	8	GTCGCTACTACCGATTGAATGGTTTAGTGAGACCTTCGGATTGGTCCCGGTATGGTGGGAAACCGCCTGGCCGTGGTTTGCTGAGAAGATGGTCGAACTTGATCATTTAGAGGAAGTAAAAGTCGTAACAAGGTTTCC
1151	5b509ffcd93ba493b6ff5a65ec79cce6	OTU_1151	128	309	1	GTCGCACCTACCGATTGAATGGTCCGGTGAAGCCTTGGGATTGCTGCTGTTGTCTTTATTGGTAACGGCTGCGAGAACTTGTCTAAACCTTATCATTTAGAGGAAGGTGAAGTCGTAACAAGGTTTCC
1152	b5d9c206dce876f3d656ee195aee331c	OTU_1152	132	309	2	GTCGCTCCTACCGATTGAATGGTCCGGTGAAGCGTTCGGACTATGACTCTCTGACGGTTCGCCGTCTAAGTGTCGTGGGAAGTTCGTTAAACCTTATCATTTAGAGGAAGGAGAAGTCGTAACAAGGTTTCC
1153	d683176b35a2e74fdb3002654ee4e3ac	OTU_1153	106	309	5	GTCACACCACGAAAGTCGGTTGTTCCAGAAGTAGTTGAGCTAACCTTCGGGAGGCAGGCTACCAAGGAATGATCGGTAATTGGGGTGAAGTCGTAACAAGGTATCC
1154	e20681013852270d56cf98f2d6f0f43e	OTU_1154	131	309	1	CCGTCGCTCCTACCGATTGAATGTTCCGGTGAATAATTCGGACTGCAGTCGTGGGGTCTGTACCACTGCGATTGTGGGAAGTTTAGTGAACCTTAACATTTAGAGGAAGGAGAAGTCGTAACAAGGTTTCC
1155	59336beba508674ab5e0a4edaecc1e06	OTU_1155	113	308	5	GTCAAGCCACCCAAGCAGGATGCACCCGAAAACATTATATCTAACCAGGGTAACCTGGAGGAAGATGTTGAAGGAGTGTTTTGTGAGGAGGACTAAGTCGTAACAAGGTAGTC
1156	3db76a9f86e0d8741f82f7b3950e0907	OTU_1156	136	308	1	GTCGCTACTACCGATTGAATGGTTTAGTGAGGCTATCGGATTGAGGGTATGGAAATGCTCTGCATTTTTAATGCTTTCGAAAAGACAGTCAAACTTGATCATTTAGAGGAAGTAAAAGTCGTAACAAGGTTTCCGT
1157	bbc8c32db6c00be76c5603118aa89163	OTU_1157	132	308	4	GTCGCTACTACCGATTGAATGGCTTAGTGAGGCCTCCGGATTGGCTTTGGGGAGCCGGCAACGGCACCTCGTCGCTGAGAAGCTGGTCAAACTTGGTCATTTAGAGGAAGTAAAAGTCGTAACAAGGTTTCC
1158	30d5ebc827a3e03f7d4b88461d9aec87	OTU_1158	131	307	10	CCGTCGCTCCTACCGATTGGGTGATCCGGTGAATAATTCGGACTGTGGCATTGTTCAGTTCCTGAACGTTGCTGTGGAAAGTCTAGTGAACCTTATCACCTAGAGGAAGGAGAAGTCGTAACAAGGTTTCC
1159	42e3e2bb3b78b3cf4924a2b931011cdc	OTU_1159	136	307	2	GTCGCTACTACCGATTGGATGGTTTAATGAGATCTTCGGATTGGAGCCGTCGTGGCCGGCAACGGTCGTGTCGGAGTCCGAGAAGTTGCTCTAATTTGATCATCTAGAGGAAGTAAAAGTCGTAACAAGGTTTCCG
1160	e232e74c9aabadb2b7050011b9d55d30	OTU_1160	136	306	2	GTCGCTAGTACCGACTAGTTGGTTTAGTGAATCATATGGAGTTGCGATAGCTTGCTGGGCAACTGGCAACTTTACGCGGCAAAGTATGGTAAACTTGGTCAACCGGAGGAACTAAAAGTCGTAACAAGGTCTCCGT
1161	b1056d2c1c0b09c2d9433de056e3a1fa	OTU_1161	128	306	5	GTCGCACCTACCGATTGAATGGTCCGGTGAAGCCTTGGGAGTGATGAGAGTGCCTTTGTTGGTTCTTTTGTTGTGAACTTGTGTAAACCTTATCATTTAGAGGAAGGTGAAGTCGTAACAAGGTTTCC
1162	ae80e749e03fdf8910b4c4f88e01b138	OTU_1162	133	306	2	GTCGCTACTACCGATTGAATGGTTTAGTGAGGTCTTCGGATTGGCGCTATCATGGCTTCACGGCTACGATGGATGCCGAAAAGTTGACCAAACTTGATCATTTAGAGGAAGTAAAAGTCGTAACAAGGTTTCC
1163	f387704ad73d279fd5695550d4e2e5f1	OTU_1163	158	306	2	GTCGCTACTACCGATTGAATGGTTTAGTGAGGCCCTTGGATTGGTCCCGGCTCTCAAGGCAGGGTTGGGGGAAACTCCTCCCTGCCGGGCCTCGGTGTTGCCGAGAAGACGGTCGAACTTGATCATTTAGAGGAAGTAAAAGTCGTAACAAGGTTTCC
1164	9284327c518ad8e09845b444b4225aa1	OTU_1164	126	306	1	GTCGCTCCTACCGATTGGGTGATCCGGTGAATACTTTGGACCGCGATGTGTTGGCAAGCCAGCACGACGTGGAAAATTGCGTGAACCTTATCACTTAGAGGAAGGAGAAGTCGTAACAAGGTTTCC
1165	76a65bdf49eeb543d9d2f6135c7039ce	OTU_1165	131	305	6	CGTCGCACCTACCGATTGAATGGTCCGGTGAAGCCTCGGGATTGTGGTTTAGTTCCTTCATTGGTACTTGACCGCGAGAACTTGTCTAAACCTTATCATTTAGAGGAAGGTGAAGTCGTAACAAGGTTTCC
1166	1e3f8df29f949a07eec70ca0824b7d89	OTU_1166	121	305	7	GTCGCTCCTACCGATTTCGAGTGGTCCGGTGAATCTTTTGGACCGAGAGGACCTCGAGTCAGCTTGGAAAGTCAGATAAACCATACTACTTAGAGGAAGGAGAAGTCGTAACAAGGTTTCC
1167	080dca07267e15a5c9e6da463d28141a	OTU_1167	131	305	2	GTCGCTACTACTGATTGGACGTTTAAGCAAGATTTTTGAATATCTGCAGTTTATACTTCGGTAAACGCAGTGGACAAGAAGAGGATCGAGCTTATCTGTCTAGAGGAAGTAAAAGTCGTAACAAGGTTTCC
1168	65e7fb206b27f6e234c1f2b736a40cde	OTU_1168	132	305	3	GTCGCACCTACCGATTGAATGGTCCGGTGAAGCTTTCGGACCTGGACAATGTCACCTTCATTGGAGACGTTGTTAAGGGAAGTTAGTTAAACCTTACCATTTAGAGGAAGGTGAAGTCGTAACAAGGTTTCC
1169	c9e044574708be262d893da5c5e73447	OTU_1169	131	304	1	CCGTCGCTCCTACCGATTGAGTGATCCGGTGAATAATTCGGACTGCAGCAGTGTTCGGTTCCTGAACGTTGCAGCGGAAAGTTTAGTGAACCTTATCACTTAGAGGAAGGAGAAGTTGTAACAAGGTTTCC
1170	576f88623a29d404805875faa2710ba3	OTU_1170	118	304	7	GTCGTTGTTTCCGATGATGGTGCAATACAGGTGATCGGACTGGCGGAGGTTTTACCTCTGCTGGGAAGTTCACCGATATTTCTTCAATAGAGGAAGCAAAAGTCGTAACAAGGTAGCT
1171	3587520006e09bcea6487725aa74b726	OTU_1171	105	304	3	GTCGTTTCTTCCGACTGATTCTCATTGTGAATTACAAGGATACTTCTGGTAGAATTGTTGTGAATGCTGGGTATTGGAGGAAGAAAAAGTCGTAACAAGGTTATC
1172	5969a1090727a8a6b00a5b9ac1635958	OTU_1172	132	303	1	GTCGCACCTACCGATTGAATGATTCGGTGAAAATTTCGGACTGTGCCACCGTACCCTTCATTGGGCATGGTGGTGTGGGAAGTTATTTAAACCTCATCATTTAGAGGAAGGTGAAGTCGTAACAAGGTTTCC
1173	a349b78dc1553d7ac3724a94eacbd2ea	OTU_1173	138	303	3	GTCGCTACTACCGATCGCTCCAGTTAATGAGCTCTTCGGATTGGCCCCGTACTGCTCGCTTCGCGGCGGGCTACCGGCGGCCGAGAAGATGCGCAAATTGACTGGGGTAGAGGTCGTAAAAGTCGTAACAAGGTATCC
1174	fd0fc545829cab89340636abc435f54f	OTU_1174	132	302	1	GTCGCTACTACCGATTGAATGGCTTAGTGAGGTCTCCGGATTGGCTTTGGGGAGCCGGCAACGGCACCCTATTGCTGAGAAGCTGATCAAACTTGGTCATTTAGAGGAAGTAAAAGTCGTAACAGGGTTACC
1175	d2b1ed53039c18002d266e7685bb0c2a	OTU_1175	114	302	2	GTCGCTCCTACCGATTGAGTGATCCGGTGAACTTTTTGGACCTGTCGCCTCGCGTATGGGGAATTTAAGCAAATCTTATCACTTAGAGGAAGGAGAAGTCGTAACAAGGTTTCC
1176	32aed221a6e9a05785cca83e10128312	OTU_1176	132	302	2	GTCGCTACTACCGATTGGGAAAATTTCAGAATGCTTAGGACTGAGACTAGAGTGGCTTCACGGCCGTTCTTGTTTTGGAAATAAGTATAATGATATTTTCCTAGAGGAAGTAAAAGTCGTAACAAGGTTTCC
1177	57b91ef6a8fab03b6ad59a04525dd7c8	OTU_1177	131	302	4	CCGTCGCTCCTACCGATTGAGTGATCCGGTGAATAATTCGGACTGCAGCAGTGTTCAGTTCCTGAACGTTGCCGTGGGAAGTTTAGTGAACCTTATCACTTAGAGGAAGGAGAAGTCGTAACAAGGTTTCC
1178	bd665de4e7ed292a9229763d05257c54	OTU_1178	131	302	6	CCGTCGTTGCTACCGATTGGCTGTAAAATAGAGGTCTTGGGACAGGCCGGAACTGGCTTTGCCACGTTCATGGTTTGAAACTCGTCCAATATTTTGCTGCTAGAGGAAGCAAAAGTCGTAACAAGGTTGCT
1179	de75eb3398c95d4528617f9e9a8b7c84	OTU_1179	139	302	3	GTCGCTACTACCGATTGGATGGTTTAGTGAGATCCTCGGACTGGCCCCGGCCGTGCGGTTCGCCGCGTCGGCCGGCTCGAGCCGGGAAGACGATCAAACTTGATTATCTAGAGGAAGTAAAAGTCGTAACAAGGTTTCC
1180	07309a15531c2f8b795fefa79b2eae71	OTU_1180	106	301	6	GTCGTTTCTTCCGACTGATACTCATTGTGAGTTGCAAGGACCCTTAATTGGGGAATTGTTGCAAATGCTTTGTATTGGAGGAAGAAAAAGTCGTAACAAGGTTATC
1181	a01b8d0b98ac70e944d202b1bf278d98	OTU_1181	107	301	16	GTCACACTCTGGAAGTTAGTTTTAATTGAAGCTTATTACTTAACCTTTTTGGAGGGTGTATGTGAGATTAAGAAGAGCGACTGGAGTGAAGTCGTAACAAGGTAGCT
1182	8f94f8ef4a91cb9d123c7db58d6e0535	OTU_1182	136	301	1	GTCGCCACTACCGATTGAATGGTTTAGTGAGAATTTTGGACTGGAGCTTTCTTGTTCAGCAATGAACGAGAGAGAGTCCGGGAAGTCATTCTAAGTGTATCATTTAGAGGAAGTAAAAGTCGTAACAAGGTTTCCG
1183	1d1ffdc18aa9fc15f225072f9582dd5f	OTU_1183	162	301	1	GTCACACTCTGAAAATTCTCATGCCTTGAAGCAAAAGAAATTCGCAACGAACACACAGCCAAAAAACAAAAGACCACACTTTCCTTCTTTTTATCTGTGTCGTTGTTGGGTTCTTTTCTAGAGTTAGGAAGGTAATTGGAGTGAAGTCGTAACAAGGTAGCT
1184	632d7beacbcc6a117b86fa92463cd6f7	OTU_1184	113	300	1	GTCGTTGTTTCCGATGATGGTGCAATACAGGTGATCGGACTGGAGCCATCTGGCTTTGGGAAGTTCACCGATATTTCTTCAATAGAGGAAGCAAAAGTCGTAACAAGGTAGCT
1185	ea3e6a18777fe496fd016b93b301463c	OTU_1185	124	300	4	GTCGCTCCTACCGATTTCGAGTGGTCCGGCGAATCTTTCGGACTGCGCGCGGCCTTGAGTCGTGTCGCGGAAAGTCAGGTAAACCTTATCACTTAGAGGAAGGAGAAGTCGTAACAAGGTTTCC
1186	d501c6473e91d50912549edcaab0b98d	OTU_1186	133	300	2	GTCGCTACTACCGATTGAATGGTTTAGTGAGGTCCTCGGACCGCGCCACGCCAGGTCTCTGGCCTAGCGTGAGTCGCGGGAAGAAGATCAAACTTGATCGTTTAGAGGAAGTAAAAGTCGTAACAAGGTTTTC
1187	e1b176fb479b4bc7e717f4ec7c8577d4	OTU_1187	106	300	1	GTCACATCACGAAAGCCGGGTGTACTAGAAGTCGTTGACCCAACCTTCGGGAGGGAGACGCCGACGGTGTGCTTGGTGATTGGGGCGAAGTCGTAACAAGGTAGCC
1188	4be98159142bc34a286feb794b9b4b95	OTU_1188	131	299	7	CGTCGCTCCTACCGATTGAATGATCCGGTGAATAATTTGGACTGCTGCATCAATCAGTTTGCTGGAAGATGGTGTGGTAAATCTTATGAGCCTTATCACTTAGAGGAAGGAGAAGTCGTAACAAGGTTTCC
1189	0d565f98ffd905e4d54c46044e5a692c	OTU_1189	131	299	3	CGTCGCACCTACCGATTGAATGACTCGGTGAAATCCCCGGACTACAGCCTCGACACCCTCGGGTGACTTGGCCGTGGAAAGCGGATTAAACCTCGCCATTTAGAGGAAGGTGAAGTCGTAACAAGGTTTCC
1190	08d486edfa0b0c49dae43b75468dd5d0	OTU_1190	133	299	5	GTCGCTCCTACCGATTGAATGATCCGGTGAGGCCCCCGGATTGTGGCCGCGGCTCTGGTTCGCTAGACTGCGGCTGCGAGAAGCTGTCCAAACCTTATCATTTAGAGGAAGGAGAAGTCGTAACAAGGTTTCC
1191	609cde0132c1969c2f248d342245ba9d	OTU_1191	136	299	13	GTCGCTACTACCGATTGAATGATTTAGTGAGGACTTCGGATCGGCTGGTGAAGCTGTCTTCGGGCGGCATTGCTGGTTGAGAAGATGTCCAAACTTGCTCATTTAGAGGAAGTAAAAGTCGTAACAAGGTTTCCGT
1192	f02aa20ca9cc6168645bebaa65e4fe95	OTU_1192	128	299	10	GTCGCACCTACCGATTGAATGGTCCGGTGAAGCCTCGGGATTGTGGCTTTTTGCTTCATTGCGATGAGTCGCGAGAACTTGTCTAAACCTTATCATTTAGAGGAAGGTGAAGTCGTAACAAGGTTTCC
1193	40fd329384f6ffa37e366aa43ec052a5	OTU_1193	131	299	6	CCGTCGCTCCTACCGATTGAGTAATCCGGTGAATAATTTGGACTGCAGCGGCGTCCAGTTCCTGGATGCTGCAGCGGAAAGTTTAGTGAACCTTATTACTTAGAGGAAGGAGAAGTCGTAACAAGGTTTCC
1194	f78325c8fccce7cafe2b7862ded42063	OTU_1194	131	299	1	GTCGCTACTACCGATTGAACGGTTTAGTGAGTTTCGAGGATCGACGACACTCGAGGTCCTGCCTTGTGTGAAGTTGAGAGCAGATGCAAACTTGATCGTTTAGAGGAAGTAAAAGTCGTAACAAGGTTTCC
1195	30c8835e74e9acc639246e4efad56517	OTU_1195	131	298	7	CGTCGCACCTACCGATTGAATGGTCCGGTGAAATCTTGGGATTCTGTTGATTTCCATTTATTTGGAGTTTGATGGGAAAACTTGAGTAAACCTTACCATTTAGAGGAAGGTGAAGTCGTAACAAGGTTTCC
1196	02bb499b524a5b0bfcf742f176d50617	OTU_1196	131	298	5	CGTCGCACCTACCGATTGAATGGTCCGGTGAAGCCTCGGGATTGTGGCCAGTTTCCTTTATTGGGAGTTGGCTGCGAGAACTTGTCTAAACCTTATCATTTAGAGGAAGGTGAAGTCGTAACAAGGTTTCC
1197	5997d542e04521236e4370b529ca5e91	OTU_1197	128	297	5	GTCGCACCTACCGATTGGATGGTCCGGTGAAGCCTCGGGATTGTGACTGTTGCCTTTATTGGTGTCGGTTGCGAGAACTTGTCTAAACCTTATCATCTAGAGGAAGGTGAAGTCGTAACAAGGTTTCC
1198	402acc135f672cc85059070a28c4f0dd	OTU_1198	131	297	9	CCGTCGCTCCTACCGATTGAGTGTTCCGGTGAATAATTCGGACTGCAGCAGCGTGGGGATCCCTCATGCTGCAGCGGAAAGTTTAGTGAACCTTAACACTTAGAGGAAGGAGAAGTCGTAACAAGGTTTCC
1199	2c574ff23779c0f5733cac4fabd77eee	OTU_1199	131	296	3	CGTCGCTCCTACCGATTGAGTGATCCGGTGAATAATTCGGACTGCAGCAGTGCTTGGTCTTCCGGGCTTTGCAGCGGAAAGTTTAGTGAACCTTATCACTTAGAGGAAGGAGAAGTCGTAACAAGGTTTCC
1200	eac77e5324fb55ee6fdb5c0e50f0175f	OTU_1200	127	296	4	GTCGCTCCTACCGATTGAATGTTCCGGTGAATACTTCGGACTGCGAGATTTGCAGTTTCTGCGCTTCTTGCGGAAAGTTGAATAAACCTTAACATTTAGAGGAAGGAGAAGTCGTAACAAGGTTTCC
1201	00d89f19f27ca17b90712e538f610c8b	OTU_1201	100	296	5	GTCGTTTCTTCCGACTAATGCTTTATGTGAGTGTCATGGATGTTTAGAAGTGCTGTGAACATTGAGTATCGGAGGAAGAAAAAGTCGTAACAAGGTTATC
1202	7e3841bf805e9e7b5aac0591cc67f52f	OTU_1202	128	296	3	GTCGCACCTACCGATTGAATGGTCCGGTGAAGCCTCGGGATTGTGACTAGCTCCTTTATTGGGGTTGGTTGCGAGAACTTGTCTAAACCTTATCATTTAGAGGAAGGTGAAGTCGTAACAAGGTTTCC
1203	2df8002e4d26f8482a43894106da94bd	OTU_1203	107	295	9	GTCACACCATGGGAGTTGGTTTTACCCGAAGATAGTGGGCTAACCTTTTAGGAGGCAGCTAGCCACGGTAAGGTCAGCGACTGGGGTGAAGTCGTAACAAGGTAGCC
1204	876def7df79d14d855eb3fc18ba7015c	OTU_1204	131	295	1	CGTCGCACCTACCGATTGAATGGTCCGGTGAAGCCTCGGGATTGTGGCGAGTTCCCTTTATTGGGAGTTTGTCGCGAGAACTTGTCTAAACATTATCATTTAGAGGAAGGTGAAGTCGTAACAAGGTTTCC
1205	6cbf9684e4dc8ffd7850a146165acbba	OTU_1205	136	293	4	GTCGCTACTACCGATTGAACAGTTTAGTGAGAGCCTCGGACTGCTGGCTGTTGTGCCTTTGCGGGTGTTGACGGTGAGCGGAAAGACGCCCGAACTTGATTGTTTAGAGGAAGTAAAAGTCGTAACAAGGTTTCCG
1206	3644aa5f93e3a20d8dff4ebc60a97080	OTU_1206	131	293	1	CCGTCGCTCCTACCGATTGAGTGTTCCGGTGAATAATTCGGACTGCGATTGCGTGGGGACTCCTCATGCTTTTGCGGAAAGTCTAGTGAACCTTAACACTTAGAGGAAGGAGAAGTCGTAACAAGGTTTCC
1207	1997ffcbd6beb0f70596d35c83fc58fe	OTU_1207	106	293	4	GTCATACCATGGAAGTGGATTGCACCAGAAGTAGATAGTCTAACCTTCGGGAGGGCGTTTACCACGGTGTGCTTCATGACTGGGGTAAAGTCGTAACAAGGTAGCC
1208	d4ae1886d3dcbb1babc3508931602476	OTU_1208	136	293	3	GTCGCACCTACCGATTGAATGGTCCGATGAACTTTTTGGATTGTTTGATGAGAATACTTTCGGGTGTTTTTGTTGAGCGAGAAGTGAAGTAAATCTTATCATTTAGAGGAAGGTGAAGTCGTAACAAGGTTTCCGT
1209	c6e1fd01617385f4805926d3ab90d60a	OTU_1209	136	293	5	GTCGCTACTACCGATTGAATGGTTTAGTGAGGAGTTTGGATCGCCGCCGTCGCGTCCAGCGATGGATGCGATGCGTGGCGAGAAGCTCTTCGAACTTGATCATTTAGAGGAAGTAAAAGTCGTAACAAGGTTTCCG
1210	5ba6ba7ca176f1d7f681305daa37f620	OTU_1210	131	293	1	CGTCGCTCCTACCGATTGAGTGGTCCGGTGAATAGTCTGGATGTTTGCCATGCTCTTGCATTTGGGCTGCGCTTTCACAAAGCTTGTAAACCTTATTACTTAGAGGAAGGAGAAGTCGTAACAAGGTTTCC
1211	85fbe5f2d92da3d79c89314d7e48f8fa	OTU_1211	106	293	5	GTCACACCATGGAAGTGGGTTGCACCAGAAGTAGCTAGTTTAACCTTCGGGAGAACGGTTACCACGGTGTGGTTCATGACTGGGGTGAAGTCGTAACAAGGTAGCT
1212	8faa0148d44dcdb51be721cb015a1937	OTU_1212	132	292	1	GTCGCTCCTACCGATTGAATGGTCCGGTGAAGCGTTTGGACTATGGTTCTCTGACGGTTCGCCATTGGATTACCGTGGGAAATTCGTTAAACCTTATCATTTAGAGGAAGGAGAAGTCGTAACAAGGTTTCC
1213	384e0dcd0059c4d5c1dad1d1e3f793bf	OTU_1213	144	292	3	GTCGCTACTATCGATTGGATGGTTTAGTGAGGACGTTGGACTGTCGACCAAGCATTCTCGTTTACCGAGTTATGTTAGAGGCACCGACGGGAAGACGTCCAAACTTGATCATTTAGAGGAAGTAAAAGTCGTAACAAGGTTTTC
1214	83dd828a0f15e23e0702f8b583ea5148	OTU_1214	139	292	1	GTCGCTACTACCGATTGAATGATTTAGTGAGGTCAACGGATTGGCCGGTGGAACTTGCCTTTCGGGGTAGGTACCGCTGCGCTGAGAAGTCGCCCGAACTTGATCATTTAGAGGAAGTAAAAGTCGTAACAAGGTTTCC
1215	97e2db163323698d66db6b768e7d94b7	OTU_1215	132	292	1	GTCGCTACTACCGATTGAATGGCTTGGTGAGGCCTTCGGACTGGCTCAGGGGGGTTGGCAACGACCCCCCAGAGCCGGAAAGTTGGTCAAACCTGGTCATTTAGAGGAAGTAAAAGTCGTAACAAGGTTTCC
1216	309054d30fc8a017bc54815a26d25b01	OTU_1216	131	291	4	CGTCGCTGCCTCCGATTGAGTGATCCGGTGAATACTTTGGACCGACGCCTCGTTTGGTTCGCCGAACTTGGTGCTGGAAAATTGAGTAAACCTTATCACTTAGAGGAAGCAAAAGTCGTAACAAGGTTTCC
1217	b74cba4d83964e7a15dee9312a81ce23	OTU_1217	114	291	1	GTCGCTCTTACCGATGGACTTCTCTGTGAGTTTGAGGGACTGGGTATTTTTAACCTATGGAAACTTAAACGAACAGTGTGGTCTAAAGGAAAGAGAAGTCGTAACAAGGCTTCT
1218	9979d6cccb404941fe1eacb3e3e2b37d	OTU_1218	128	291	1	GTCGCTCCTACCGATTGGATGATTCGGTAAGCTCTATGGATCGCCTATGTTCTCTGTTTCAGAGACTTCGGTGAGAAACTGATCAAACCTAATTATCTAGAGGAAGGAGAAGTCGTAACAAGGTTTCC
1219	64628fbcb85bf13730b53102d9c53513	OTU_1219	132	291	1	GTCGCTACTACCGATTGAATGGCTTAGTGAGGTCTTCGGATTAGTTTTTGGGAGCCGGCAACGGCACCTAGAAGTTGAGAAGTTGATCAAACTTGGTCATTTAGAGGAAGTAAAAGTCGTAACAAGGTTTCC
1220	c4651a1c8c97cf2588d4baeca00d665b	OTU_1220	127	291	7	GTCGCTCCTACCGATTGAGTGATCCGGTGAGCTATGTGGCCACAGCCATGCACAACTGCTGAGCACAGCTGTGAAAGTTTTGCAAACCTTACCACTTAGAGGAAGGAGAAGTCGTAACAAGGTTTCT
1221	e52d53d782bb3c258fccaab7ee3a20db	OTU_1221	131	291	6	CCGTCGCTCCTACCGATTGAGTGATCCGGTGAATAATTTGGACTGCAGTAATGTTTGGATCCCGAATATTGCAGCGGAAAGTTTAGTGAACCTTATCACTTAGAGGAAGGAGAAGTCGTAACAAGCTTTCC
1222	cb36f6d979e1b47cb8921c0cb4dd6389	OTU_1222	104	291	9	GTCGTTTCTTCCGACTGATACTCATTGTGAATTACGAGGATGGATTCCCAAAATCGTTGTAAATGCTGGGTATTGGAGGAAGAAAAAGTCGTAACAAGGTTATC
1223	d9b882ac8363deaea27ad15015b256b7	OTU_1223	128	290	9	GTCGCTCCTACCGATTGAGTGATCCGGTGAATAATTCGGACTGCAGAGGTTTCGAGTTTCGGAACCATTTGGAGGAAGTTTAGTGAACCTTATCACTTAGAGGAAGGAGAAGTCGTAACAAGGTTTCC
1224	90f53873ce927e87854e98e5520e299c	OTU_1224	106	290	4	GTCACATCACGAAAGTCGGCTGTACCGGAAGTCGGTGGGCTAACCTTCGGGAGGCAACTGCCCATGGTATGGTCGGCGATTGGGGTGAAGTCGTAACAAGGTAGCT
1225	e6422dc65231deca49918615cdd0a1ac	OTU_1225	136	289	2	GTCGCTACTACCGATTGAATGGTTTAGTGAGATCCTCGGATTGGACCCGCGGCCCCTTTCGGGGGGCCGGCGGAGGCTCGAGAAGACGATCGAACTTGATCATTTAGAGGAAGTAAAAGTCGTAACAAGGTTTCCG
1226	31b3589951f8cc236a218b053a655859	OTU_1226	105	289	1	GTCACACCATGGGAGTGTATTGCACCAGAAGTGGGTAGTCTAACCTTCGGGAGGGCGCTCACCACGGTGTGGTCCATGACTGGGGTGAGGTCGTAACAAGGTAGC
1227	5bb1f8c90c2556e7d638a33006a7c717	OTU_1227	133	288	1	GTCGCTACTACCGATTGAATGGCTTAGTGAGGACTTGGGAGAGTACATCGGGGAGCCAGCAATGGCACCCTGACGGCTCAAACTCTTACAAACTTGGTCATTTAGAGGAAGTAAAAGTCGTAACAAGGTATCT
1228	9a8e2789fbdb15dfc76e68142cffee3d	OTU_1228	131	288	2	CGTCGCTACTACCGATTGAACGTTTTAGTGAGGTATTTGGATCGGCGCTCTGGAGGTTCACTCCTCCGTTGCGCTGAGAAGACTCCCAAACTTGAGCGTTTAGAGGAAGTAAAAGTCGTAACAAGGTTTCC
1229	75ff973ae4c8d57e4a55aa5346bd57eb	OTU_1229	138	288	8	GTCGCTACTACCGATTGAACGGTTTAGTGAGGTCGTCGGATCGGTCTCGCACTGACTATTCATTTAGCCGGAGCGTAGCATTGAAAAGACGCCCAAACTTGATCGTTTAGAGGAAGTAAAAGTCGTAACAAGGTTTCC
1230	548eeea4b79bb66fb6f521ab1a3824ee	OTU_1230	131	288	1	CGTCGCACCTACCGATTGAATGGTCCGGTGAGGACTCGGGATTGTGGTTTGGCTCCTTCATTGGGGCCTGACCGCGAGAACTTGTCCGAACCTTATCATTTAGAGGAAGGTGAAGTCGTAACAAGGTTTCC
1231	79068bb146cd9c637a818c255bcd9b9b	OTU_1231	131	287	6	CCGTCGCTCCTACCGATTGAGTGATCCGGTGAATTGTTCGGACCTGCGCTATCTCCGGTTTCCGGATTTAGTGTGGGAAAGTTCTGTGAACCTTATCACTTAGAGGAAGGAGAAGTCGTAACAAGGTTTCC
1232	bd453af7c735aae02daff50c51bc4440	OTU_1232	106	287	5	GTCAAGCCACGAAAGTGGGGTGCGCCCGAAGTCGCTGTAGCAACCGCAAGGAGCAAAGCGCCGAAGGTGAACTCCGCGATTGGGACTAAGTCGTAACAAGGTAGCC
1233	7beae1a4a6ae524d9020b290da512d50	OTU_1233	131	287	2	CGTCGCACCTACCGATTGAATGGTCCGGTGAAGCCTCGGGATTGTGATTTGTTGCCTTTATTGGTGATTTGTCGCGAGAACTTGTCTAAACCTTATCATTTAGAGGAAGGTGAAGTCGTAACAAGGTTTCC
1234	7ae9ea595c362741de4c7d78c46b7c54	OTU_1234	107	286	10	GTCAAGCCACGAAAGTTGGGAGGGCCCGAAGTCGCTGAGCTAACTCTCTGAGAGGCAGGCGCCGAAGGTCAGCTCGACAATTGGGACTAAGTCGTAACAAGGTAGCC
1235	75a4ac5a362a9f55757dbdbb86765506	OTU_1235	133	286	4	GTCGCTCCTACCGATTGAATGATCCGGTGAAAACTCAGGACTGGCGATTTTTGTTGGGTTTCCAACGATGATTGTCCGGGAATTTGTTTAAACCTTATCATTTAGAGGAAGGAGAAGTCGTAACAAGGTTTCC
1236	15f392fc752a8c94bec6a3c86bf167e7	OTU_1236	127	286	6	GTCGCTCCTACCGATTGAGTGATCCGGTGAATACTTCGGAGTGTGAACTCTACAGTTTCTGTTTTGTTCGCGCAAAGTTGAATAAACCTTATCACTTAGAGGAAGGAGAAGTCGTAACAAGGTTTCC
1237	6f37a0506a3560601867ea4f41e156e7	OTU_1237	131	285	5	GTCGCTACTACCGATTGAATGGCTTAGTGAGCCTTTGGGATTGGCAGCCAACACCGGCAACGGTAGCTGGCCGCCGAAAACTTATGCAAACTTGGTCATTTAGAGGAAGTAAAAGTCGTAACAAGGTTTCT
1238	cc1985283e4c9b95afc21daa2e5c742f	OTU_1238	131	284	7	CGTCGCTCCTACCGATTGGATGAATCGATGAGCCCTTTGGAGATAGCAGTTGCAGCCTTCGGGTGGATTCTGCCGTCGAAATTGTGCAAATCTGTTCATTTAGAGGAAGGAGAAGTCGTAACAAGGTTTCC
1239	61e61fa12b7145a3d6c783c172be9e7b	OTU_1239	132	284	1	GTCGCTACTACCGATTGAATGTTTTAGTGAGGAATTTGGATTGGACCTTTCGCGGCGCGAGTTGCGAATGTTGTCTGAGAAGACTGCCAAACTTGAGCATTTAGAGGAAGTAAAAGTCGTAACAAGGTTTCC
1240	ac6db29f2ac3cc2d2b3fedb59be5cbc6	OTU_1240	131	284	1	CCGTCGCTCCTACCGATTGAGTGATCCGGTGAATAACTCGGACTGAAGCAGTGTTCGGTTCCTGAACGTTGCATCGGAAAGTTTAGTGAACCTTATCACTTAGAGGAAGGAGAAGTCGTAACAAGGTTTCC
1241	1b9c63bfd087a4c8c2d941c2e5535571	OTU_1241	132	283	2	GTCGCACCTACCGATTGAATGATTCGGTGAAAATTTCGGACCGTGCTGCCGTGCCCTTCACTGGGCGTAGTGGCGTGGGAAGTTGTTTAAACCTCATCATTTAGAGGAAGGTGAAGTCGTAACAAGGTTTCC
1242	298c4b20f32285dc2f4fa9a3bb4e9557	OTU_1242	126	283	8	GTCGCTCCTACCGATGGAGTGGTCCGGTGAATAATTCGGATCGAGATCTGAAGCTCACGCTTCAATTTTCGAAAAGTTTAGTGAACCTTATCACTTAGAGGAAGGAGAAGTCGTAACAAGGTTTCC
1243	4a9792142d99d1ce1a611a5c7d315913	OTU_1243	108	282	3	GTCACATCACGAAAGTGGGTTGTACTAGAAGTGGGAGAGCCAACTCTTTTGAGAGGCATCTCACCACGGTATGATTCATGATTGGGGTGAAGTCGTAACAAGGTAGCT
1244	2427d3db2466a58d10075fd459b8f418	OTU_1244	137	282	1	GTCGCTACTACCGATTGAATGGTTTAGTGAGATCCTTGGATTGGTCCCGGCGCGGCAGGCAACTGCCGGGACGGTGATGCCGAGAAGACGATCAAACTTGACTATTTAGAGGAAGTAAAAGTCGTAACAAGGTTTCC
1245	76682dbcc3cd535d903cea1db857b9ce	OTU_1245	126	282	1	GTCGCTCTTACCGATGGACTTTTCTGTGAGTTTGAGGGACTGGCGCTCTTGCTTCGGCGGGATGCGCTATGGAAACTCAAACGAACAGTGTGGTCTAAAGGAAAGAGAAGTCGTAACAAGGCATCT
1246	6e1b7af24d5062f982fa9b042c6000fa	OTU_1246	136	282	1	GTCGCTACTACCGATTGAATGGTTTAGTGAGATCCTCGGACCGGAGCTATCCCGTTCAGCAATGAATGAGATGGATTCTGGGAAGTTGCTCAAACTTGATCATTTAGAGGAAGTAAAAGTCGTAACAAGGTTTCCG
1247	53507fe54ebc178c0b15fb0822c39e7c	OTU_1247	108	282	5	GTCACATCATGAAAGCCGTCTGCACCCGAAGTCGTTGATCCAACCCGCAAGGGAGGAAGGCGCCGAAGGTGTGGGTGGTGATTGGGATGAAGTCGTAACAAGGTAGCC
1248	ffce8cb4f2224fe0f243eccef72854a4	OTU_1248	106	282	4	GTCACACCATGGGAGTTGGTTTTACCTTAAGCCGGTGCGCTAACCGCAAGGAAGCAGCCGTCCACGGTAGGGTCAGCGACTGGGGCGAAGTCGTAACAAGGTAGCC
1249	69bf1d2a073f382283d9ad5540fc08e1	OTU_1249	138	282	2	GTCGCTACTACCGATTGGGCGATTTAGTGAGCGCCTCGGATTGGACCCGGAACGATCGGCAACGACCGTACCGCTGTGTGCCGATAAGACGCGCAAACTTGATCGCCTAGAGGAAGTAAAAGTCGTAACAAGGTTTCC
1250	3446a11b4cb7bdca463ec854c99be577	OTU_1250	131	282	1	GTCGCTACTACCGATTGAACGTTTTAGTGAGGTATTTGGACTGGACCTCGGAGGTTTACGCCGCCGTTGCTGTTCGGGAAGACTCCCAAACTTGAGCGTTTAGAGGAAGTAAAAGTCGTAACAAGGTTTCC
1251	088aa3e558df4c1ac1d338ef1106eda1	OTU_1251	127	281	3	GTCGCTCCTACCGATTGAGTACCACGGTGAATAATCCGGATTGCGAATACGCGACTGTGTCGTGTGTTTGTGAAAAGTTTAGTGAACCTTAGTACTTAGAGGAAGGAGAAGTCGTAACAAGGTTTCC
1252	aaf89a0d20bc3d5352068d015ebf4ee8	OTU_1252	125	281	6	GTCGCTCCTACCGATTGAGTGATCCGGTGAATAGTTCGGATCGTGCAGGTCGCCCTCGGGTGCTTGTATGAGAAGTTCAGTAAACCTTATCACTTAGAGGAAGGAGAAGTCGTAACAAGGTTTCC
1253	f1ada5d4ca096be243c8007a702f7dcb	OTU_1253	100	281	12	GTCGCTCCTACCGATCGAGTGTTTAGATGAATTTGATGGACGTAAGGAAGTCAAATAAATCTGAGCACTTAGAGGAAGGAGAAGTCGTAACAAGGTTTCC
1254	09f28622e430093ae72a36e869579de1	OTU_1254	127	281	1	GTCGCTCCTACCGATTGGGTGATCCGGTGAATGACTCGGACTTTGGCGTTCCTAGATACTAGGTTCGTCGAGGGAAGTTTTGTGAACCTTATCACTTGGAGGAAGGAGAAGTCGTAACAAGGTTTCC
1255	e837be2a181c5653b5ed10b4fe254860	OTU_1255	136	281	2	GTCGCTACTACCGATTGAACGATTTAGTGAGAAAATCGGATCGGAGTCCTGGTATTCGGGAAACTGAATCCGGGTACACTGAGAAGACGTTCAAACTGTATCGTTTAGAGGAAGTAAAAGTCGTAACAAGGTTTTC
1256	5a7c312465c774f80a092cbd7a6b4f08	OTU_1256	105	281	1	GTCGTTTCTTCCGACTGATACTCATTGTGAGTTGCAAAGATTCTACTTGAAGAATTGCTGCGAATGCTTTGTATTGGAGGAAGAAAAAGTCGTAACAAGGTTATC
1257	0d575eb97dd59aee724a1ea73f3069d2	OTU_1257	108	280	6	GTCACATCACGAAAGTTGGCTGTACTAGAAGTCGCTAGGCTAACCCGCAAGGGAGGCAGGCGCCGACGGTATGGTTGATGATTGGGGTGAAGTCGTAACAAGGTAGCT
1258	99c17d0a2d19a9bc95d5339da268eb5f	OTU_1258	131	280	5	CCGTCGCTCCTACCGATTGAGTGATCCGGTGAATAACTCGGACTGACGCAGTGCTCAGCTTCTGGACGTTGCGTTGGAAAGTTTCATGAACCTTATCACTTAGAGGAAGGAGAAGTCGTAACAAGGTTTCC
1259	35c4c1192422a5f1efb695c553e8a6b1	OTU_1259	128	280	9	GTCGCTCCTACCGATTGAGTGATCCGGTGAATAATTCGGACTGCGGGTAACTCGGTTTTCGGGTCTCTCTGCAGGAAGTTTAGTGAACCTTATCACTTAGAGGAAGGAGAAGTCGTAACAAGGTTTCC
1260	7662ea7b94047c01ab6aac9c31ad8bec	OTU_1260	131	280	6	GTCGCTCCTACCGATTGGATGTTTCGATGAGCCGTTCGGAGGAATTTGGTGAAGGCGTAAGCTCGGAACCGGAATCCAAAGTTCTGCAAATCTGAATATCTAGAGGAAGGAGAAGTCGTAACAAGGTTTCC
1261	6af684678223f63547a64653cc26ad43	OTU_1261	109	280	3	GTCACACCACGAAAGTCGTCTACACCCGAAGTCGTCTTAGCTAACCTGTAAAGGAGGCGGATGCCGAAGGTGTGGGTGGTGATTGGGGTGAAGTCGTAACAAGGTAGCT
1262	2a2ddac3dbfeb90db79d65313e020e72	OTU_1262	121	280	1	GTCGCTGCAACTGATTGGGTTATTCGGTGAACACCTTAAAAAATGTTATTTATCTTAATTATGTTTGAAGAGCTGTAAACTGTATTAGCCTAGAAATTGCAAAAGTCGTAACAAGGTTTCC
1263	7d86884a2538406e90682f7a8c1080ae	OTU_1263	106	279	5	GTCACACCATGGGAGTTGGTTCTACCCGACGACCGTGCGCTAACCTTTTGGAGGCAGCGGACCACGGTAGGATCAGCGACTGGGGTGAAGTCGTAACAGGGTAGCC
1264	ff443146eb36b9b8100f7af3cc9725f8	OTU_1264	107	279	9	GTCACACCATGGGAGTAGATTGTACCAGAAGCGGGTAGACTAACCTTTTAGGAGGTCGCCCACCACGGTATGATTTATGACTGGGGTGAAGTCGTAACAAGGTAGCC
1265	0b7b0d700ab9cdd4cf4b50a06ecdb034	OTU_1265	108	279	5	GTCACATCACGAAAGTTAGTTGCTCTTGAAGTCGCTGAGTTAACCCTTCGGGGAGACAGGTGCCGACGGAGTGGCTGGCGATTGGGGTGAAGTCGTAACAAGGTAGCT
1266	0a5bd3d7a803a4d2ca1c5154f8eeb7d8	OTU_1266	131	279	2	CGTCGCTCCTACCGATTGAATGTGCTGGTGAAAAGTTCGGATTGGGAATAGGAGACGGCAACGTATCCTGTTTCTGAGAAAATCTTTAAACCCTCCCATTTAGAGGAAGGAGAAGTCGTAACAAGGTTTCC
1267	38bb2aa433f92c5f3e80d60dcbfb48b6	OTU_1267	128	279	3	GTCGCTCCTACCGATTGAGTGATCCGGTGAATAATTCGGACGGAGTTCTAAGCCGGCAACGGTTTGGAATTCTGAAAGTCTAGTGAACCTTATCACTTAGAGGAAGGAGAAGTCGTAACAAGGTTTCC
1268	b7a4a6c13206d8af0a831569616f01d1	OTU_1268	128	279	10	GTCGCACCTACCGATTGAATGGTCCGGTGAAGCCTCGGGATTGTGACCGATGCCATTACTGGTGTCAGTTGCAAGAACCTGTCTAAACCTTATCATTTAGAGGAAGGTGAAGTCGTAACAAGGTTTCC
1269	5b638ff3e2c72c9a92bef96fbf966667	OTU_1269	136	279	8	GTCGCTACTACCGATTGAATGGTTTAGTGAGATCTTCGGATTGGAGCCCTCGGGAGCGGCGACGCTTCCTTGGGATTTCGAGAAGTTGCTCTAACTGAATTATTTAGAGGAAGTAAAAGTCGTAACAAGGTTTCCG
1270	4cd26641b03bf325444f942bec46187e	OTU_1270	145	279	7	GTCACACTATGAAAGTGAATCGTATTCAAAGAAATTGTGCTTTTTTTTATTTATATCACTTTTCTATTTATTGTTGTGATGTCGTATTTAAAAGATGTTTTTACAGTACTGTTTATGATTGTAGTGAAGTCGTAACAAGGTAGCT
1271	a1f602978dbdfe577aea8e14b45d1da7	OTU_1271	131	279	1	GTCGCTACTACCGATTGAATGGCTTAGTGAGCCTTTGGGATTGGCAGCTTGTACCGGCAACGGTAGCAGGCAGCTGAAAACTTATGCAAACTTGGTCATTTAGAGGAAGTAAAAGTCGTAACAAGGTTTCT
1272	fbdbdd7a5ccf2e891817d68512a79944	OTU_1272	131	278	4	CGTCGCACCTACCGATTGAATGTTTCGGTGAAACTTTCGGACCGTAGCCTTTGGACCCTCGGGTCCTTTGGCTGTGGAAAGTTATTTAAACCTCAACATTTAGAGGAAGGTGAAGTCGTAACAAGGTTTCC
1273	9c3bf5887514551ba85f003549227d6d	OTU_1273	128	278	12	GTCGCTCCTACCGATTGAGTGATCCGGTGAATAATTCGGACGAGAATTTGGGGTAGTTCTACTCCTTATTCTTGAAAGTCTAGTGAACCTTATCACTTAGAGGAAGGAGAAGTCGTAACAAGGTTTCC
1274	e740de2cbf36a84e92fe2ce0a959eea5	OTU_1274	121	278	6	GTCGCTCCTACCGATTTCGAGTGGTCCGGTGAATTTTTTGGACCGAGACGGCCTTGAGTTGTCTTGGAAAGTCAAATAAACCATACTACTTAGAGGAAGGAGAAGTCGTAACAAGGTTTCC
1275	1810b9684aba1ead49c81fe81618c309	OTU_1275	132	278	4	GTCGCTACTACCGATTGAATGGTTTAGTGAGATCTTCGGATTGGCTCTGTCGCGGCTTAACGGACGTGATGGTGCCGAAAAGTTGCTCAAACTTGATCATTTAGAGGAAGTAAAAGTCGTAACAAGGTTTCC
1276	bf840f4d30beb59d83ef63c5cf324f5a	OTU_1276	108	278	8	GTCACATCACGAAAGCTGGCTGTACTAGAAGTCGCCGAGCTAACCCGTAAGGGAGGCAAGCGCCTAAGGTATGGTTGGTGATTGGGGTGAAGTCGTAACAAGGTAGCT
1277	7032f948324b40400716f4fc23e94f0e	OTU_1277	132	277	2	GTCGCACCTACCGATTGAATGGTCCGGTGAAGCTTTCGGACTTTTGCAATGTCGCCTTGATTGGGGACGCTGCTATGGGAAGTTAGTTTAACCTTACCATTTAGAGGAAGGTGAAGTCGTAACAAGGTTTCC
1278	0b8fc7a47455a7ac49b03d792b040253	OTU_1278	131	277	4	CCGTCGCTCCTACCGATTGAGTGATCCGGTGAATAATTCGGACTGCAGCAGTGTCCAGTTCCTGGACGTTGCAGCGGAAAGTTTAGTGAACCTTATCACTTAGAGGAAGGAGAAGTCGTAACAAGGTTTCC
1279	eb18bb83312d9994d828e9a55f4f9bcc	OTU_1279	133	277	1	GTCGCTCCTACCGATTGGGTGATTCGGTGAGCTCTTGGGATCGCTTGATTTGTTTCTCGTTAAGAGATCTTTTCATTGAAAACTTGATCAAACCTAATCACCTAGAGGAGGGAGAAGTCGTAACAAGGTTTCC
1280	ac15c33b83fa56f2ab4085795f5ad6fd	OTU_1280	131	276	7	CGTCGCACCTACCGATTGAATGGTCCGGTGAAATTCTCGGACGACGCCAGGGAATGTTAATTCGGCACCTGATGTTGAAAGTTAATTAAACCTTACCATTTAGAGGAAGGTGAAGTCGTAACAAGGTTTCC
1281	0604c4dbf4161b8eff5b2f9cc25e174d	OTU_1281	133	276	10	GTCGCTACTACCGATTGAACAACAGGGTGAAATCTTCGGACTGTGGCATTCTTGCGGCCTAGCCGCAACTTGTCCGTGGGAGGTCGCTTAAATCCTGTTGTTTAGAGGAAGTAAAAGTCGTAACAAGGTTTCC
1282	05fd9f279fb3a4ae449f30c2ba4542a9	OTU_1282	131	276	3	CGTCGCACCTACCGATTGAATGGTCCGGTGAAGCCTTGGGATTGTAGCCAGCTTGCTTTATTGGAAGTTAGTTGTGAGAACTTGTCTAAACCTTATCATTTAGAGGAAGGTGAAGTCGTAACAAGGTTTCC
1283	689d3ac26c990ef7740adb531da6500e	OTU_1283	131	276	7	GTCGCTACTACCGATTGAATGGCTTAGTGAGCTCTCTGGACTGTTGCACTTCGGGGGCAACCCTGTTGAGCATACGGGAAGGAGATCAAACTTGATCATTTAGAGGAAGTAAAAGTCGTAACAAGGTTTCC
1284	8b9d7edab86071c6fddd9d691771c3f4	OTU_1284	127	275	1	GTCGCTCCTACCGATTGGATGATCCGGTGAGCTATTCGGACTTACGCTTTGTCGATTTTCGGCTTTGTGTGGGAAAGTCTCGCGAACCTTATCATCTAGAGGAAGGAGAAGTCGTAACAAGGCTTCC
1285	85ea138c35b9b06254d0c7b0538fd9db	OTU_1285	139	275	1	GTCGCTACTACCGATTGGATGGTTTAGTGAGATCCTCGGACTGGCCCCGGCCGTGCGGTTCGCCGCGTCGGCCGGCCCGAGCCGGGAAGACGATCAAACTTGATTATCTAGAGGAAGTAAAAGTCGTAACAAGGTTTCC
1286	634942b759c6f7408c751c8703c8c62d	OTU_1286	105	275	1	GTCACACCATGGGAGTTGGCTTTACCCGAAGGCGGTGCGCTAACCGTAAGGAAGCAGCCGACCACGGTAAGGTCGGCGACTGGGTGAAGTCGTAACAAGGTAGCC
1287	236e63dd34c01f2e8989f866ed9cb184	OTU_1287	131	275	3	CCGTCGCTCCTACCGATTGAGTGATCCGGTGAATAATTCGGACTGCAGCATTGCTCAGTCCCTGAACGTTGTCGCGGAAAGTCTAGTGAACCTTATCACTTAGAGGAAGGAGAAGTCGTAACAAGGTTTCC
1288	ef7be6014248f5088ac5262df40afb80	OTU_1288	132	274	2	GTCGCATCTACTGATTGAATGACTCGGTGAAAAATTGGGACTGTGAGAACAATCGATTCATTTCGAATGTACTTGTAGAAACTCTTTTTAACCTCGCCATTTAGAAGAAGATGAAGTCGTAACAAGGTTTCC
1289	c0122e652a41a1e9ea055b935e645e57	OTU_1289	107	274	3	GTCACACCACGAAAGTTTTTTGTACCCGAAGTTGTCTTAGCTAACCTTTTGGAGGCGGCCAACGACGGTATGGGAGATGATTGGGGTGAAGTCGTAACAAGGTAGCT
1290	512d3a3678c07c75609bfec6531fb27b	OTU_1290	108	273	9	GTCACACCATGGGAGTTGGGTTTACCCGAAGGCCGTGCGCCAACCTTTCGAGGGGGCAGCGGACCACGGTGAGCTCAGCGACTGGGGTGAAGTCGTAACAAGGTAGCC
1291	13a733568c72e6eb195fa169674b0b60	OTU_1291	131	273	4	CGTCGCACCTACCGATTGAATGGTCCGGTGAGGCCTCGGGATTGTGACTAGTTCACTTCATTGTGAGTTGGTTGCGAGAACTTGTCCAAACCTTATCATTTAGAGGAAGGTGAAGTCGTAACAAGGTTTCC
1292	f5b87601adf3ede6fbab0a117c5b417c	OTU_1292	122	273	1	GTCGCTCCTACCGATTGAGTGATCCGGTGAATAATTCGGACTGTGACTCATCTGTTGATGTGTTATGGAAAGTCTAGTAAACCATATCACTTAGAGGAAGGAGAAGTCGTAACAAGGTTTCC
1293	7aae42869a7c57b093322a0f67fc4a4f	OTU_1293	108	272	1	GTCAAGCCACGAAAGTGGGGTGCGCCCGAAGTCGCCGAGCTAACCCGCAAGGGAGGCAAGCGCCGAAGGTGAACTCCGCGATTGGGACTAAGTCGTAACAAGGTAGCC
1294	eb6d304775c631cdb57ccbaed5a2bfbd	OTU_1294	131	272	5	CGTCGCACCAACCGATTGGATGTTTTGTTGAAATATGTGGATGCTTGTTGGGTGAATTCATTTTTGCTTGATAGACAGAAACGTATTAAAACTGAATATCTAGAGGATGGTGAAGTCGTAACAAGGTTTCC
1295	0aa17160ea703b0a6be3345a0959d761	OTU_1295	131	272	5	GTCGCTACTACCGATTGAATGGCTTAGTAAGCCTTTGGGATTGGCAGCTTGTACCGGCAACGGTAGCAGGCAGCCGAAAACTTAGGCAAACTTGGTCATTTAGAGGAAGTAAAAGTCGTAACAAGGTTTCT
1296	0411f3a79aae6f0a5952896073fa030a	OTU_1296	132	271	1	GTCGCTCCTACCGATTGAATGGTCCGGTGAAGCGCTCGGACCGCGGCCTCTTGGCGGTTCGCCGTCGATTGGCTGTGGGAAGTTCGTTAAACCTTATCATTTAGAGGAAGGAGAAGTCGTAACAAGGTTTCC
1297	b142fc6aa5cc894ac53f3c20baafa0e6	OTU_1297	131	271	7	CCGTCGCTCCTACCGATTGAGTGTTCCGGTGAATAATTCGGACTGCAGCAGTTTTCAGATTCTGAATTCTGCTGTGGAAAGTTTGGTGAACCTTAACACTTAGAGGAAGGAGAAGTCGTAACAAGGTTTCC
1298	3b98fecdd7d183ea56de755faf52f019	OTU_1298	132	271	1	GTCGCTACTACCGATTGGGAAAATTTCAGAATGCTTAGGACCGGATCTTGTTCGGCTTCACGGCCTTACTTGAACTGGAAATAAGTATAATGATATTTTCCTAGAGGAAGTAAAAGTCGTAACAAGGTTTCC
1299	035aec0a9cc9a614d279f1890323c938	OTU_1299	105	271	7	GTCAAGCCACGAAAGTTGGGGGGGCCCGAAGTCGCGATTCTAACCTCGTGAAGATAGCGCCGAAGGTCAACTCGATGATTGGGACTAAGTCGTAACAAGGTAGCC
1300	dbbd278b8ebaf3a81e66f94a4cc0d7c0	OTU_1300	116	271	1	GTCGCTCCTACCGATTGGGTGATACGGTGAAACTCTTGGAAGCAACTAGTTCCTAGTTTGAAGAAGAGATTTAAATCGTTCCACTTAGAGGAAGGAGAAGTCGTAACAAGGTTTCC
1301	ba579c8a67d4debb90a9a66918dc04d2	OTU_1301	106	270	7	GTCAAGCCACGAAAGCTGGGAGTGCCCGAAGTCGTTTGCCTAACCGCAAGGAGGGCGACGCCGAAGGCAAGCCTGGTGATTGGGACTAAGTCGTAACAAGGTAGCC
1302	351e6b4b148abfaafbac6dbd24312777	OTU_1302	125	270	1	GTCGCTGCAACTGATTGGATAATTCGGTGAATTGTTTTGAGAGTCAACCTCTTTCCAGAGGTTCTGATTTGATTTTCTGTAAACTGTTTTTATCTAGAAATTGCAAAAGTCGTAACAAGGTTTCC
1303	e89057be4b8647a0adcce4a1119821ef	OTU_1303	133	270	3	GTCGCTACTACCGATTGGATGGTTTAGTGAGGTCTTCGGATTGCGCTGAGGTGGGTCGCGAGACTCGCCTCGGCTGCGAGAAGTAGATCAAATTTGATCATCTAGAGGAAGTAAAAGTCGTAACAAGGTTTCC
1304	1ede951e2782ff5fbfa324fe9eb22cd8	OTU_1304	131	270	4	CGTCGCTCCTACCGATTGAGTGATCCGGTGAATAATTTGGACCCGATTTGCATGGGGTTCGCTCCTAGCTTATCGGGAAAATCTAGTAAACCTTATCACTTAGAGGAAGGAGAAGTCGTAACAAGGTTTCC
1305	b6aa1205e662ab59e4c8340f75f54191	OTU_1305	131	270	11	CCGTTGCTCCTACCGATTGAATGATCCGGTGAATAATTCGGACTGCAGCAGTGTTCGGTTCCTGAACGTTGCAGCGGAAAGTTTAGTGAACCTTATCACTTAGAGGAAGGAGAAGTCGTAACAAGGTTTCC
1306	5e64c212de2026321844d6f526d739ff	OTU_1306	131	269	8	CCGTCGCTCCTACCGATTGAGTGATCCGGTGAATATTTCAGACTGCGCTTAGTGTTGGTCTCCAATGCTTAGCGTGGAACGTTTCGTGAACCTTATCACTTAGAGGAAGGAGAAGTCGTAACAAGGTTTCC
1307	f5fce54f730012c4595bb93838924357	OTU_1307	131	269	4	CGTCGCACCTACCGATTGAATGGTCCGGTGAAGCCTCGGGATTGCGATGAGTTTCCTTCATTGGGAGTTCGTCGCGAGAACCTGTCTAAACCTTATCATTTAGAGGAAGGTGAAGTCGTAACAAGGTTTCC
1308	80e5cb3365d46f3946a6ac0cf74ebb04	OTU_1308	105	268	1	GTCGTTTCTTCCGACTGATACTCATTGTGAGTTGCAAGGATCCCTGGTGGAAAATTGCTGCGAATGCTTTGTATTGGAGGAAGAAAAAGTCGTAACAAGGTTATC
1309	ff20b9c93f6c3b52e96171893f93afb9	OTU_1309	132	268	7	GTCGCTCCTACCGATTGGGTGATTCGGTGAGCTCTTGGGATCATTGCTTAAGCTACCCGTCAGGGTTCTTCTGCTCGAGAACTTGATCAAACCTAATCACCTAGAGGAAGGAGAAGTCGTAACAAGGTTTCC
1310	e2cd2294f8b43fccfa9711978bfb2f52	OTU_1310	127	268	2	GTCGCTCCTACCGATTGAGTGATCCGGTGAATAATTCGGACTGCGGTTATGTAACTGCGTTGCATTTCTGCGGGAAGTTTAGTGAACCTTATCACTTAGAGGAAGGAGAAGTCGTAACAAGGTTTCC
1311	22e2b41eea2a593a276bc18ecfd94e9c	OTU_1311	136	268	1	GTCGCTCCTACCGATTGAATGATCCGGTGAAATTTAAGGACCGATGCGCCTGGCTGGCTTGCCAGTCCTGGGCGAGGTCGGGAATTGAATTAAACCTTATCATTTAGAGGAAGGAGAAGTCGTAACAAGGTTTCCG
1312	0588bc681030387e4348187160eee354	OTU_1312	132	267	3	GTCGCTACTACCGATTGAATGATTTAGTGAGGCATTCGGACTGGGGATTGCAGGTGTTTCGGCGCTTGCTTTACTCGGAAAGAAATTCGAACTGAATTTTTTAGAGGAAGTAAAAGTCGTAACAAGGTTTCC
1313	323c5e4dd4ec38b53579aea211b33c39	OTU_1313	127	267	3	GTCGCTCCTACCGATTGAATGCTCAGGTGAGCCATTCGGACCTCCATCATAGCGGTTTCCGTTTTGATAGAGGAAAGTCTTGCGAACCTTATCATTTAGAGGAAGGAGAAGTCGTAACAAGGTTTCC
1314	b3494b06861a50608d8d2155c4734613	OTU_1314	131	267	5	CCGTCGCTCCTACCGATTGAGTGATCCGGTGAATAATTCGGACTGCAGCACTGCTTGGTCTCCAGGCTTTGCAGCGGAAAGTTTAGTGAACCTTATCACTTAGAGGAAGGAGAAGTCGTAACAAGGTTTCC
1315	18c478e3a2e36ffba8cabcd971f14149	OTU_1315	108	267	8	GTCAAGCCACGAAAGTGGGGTGCGCCCGAAGTCGCCGAGCTAACCCGCAAGGGAAGCAAGCGCCGAAGGTGAACTCCGCGATTGGGACTAAGTCGTAACAAGGTAGCC
1316	07eac90220d59f1a95cc4f5350024724	OTU_1316	131	267	1	CGTCGCACCTACCGATTGAATGGTCCGGTGAAGCCTCGGGATTGTTACCGGTTCGCTTTATTGTGAGTTGGTGGCGAGAACTTGTCTAAACCTTATCATTTAGAGGAAGGTGAAGTCGTAACAAGGTTTCC
1317	1fa18a3b718ae941e072c8aa98dc740e	OTU_1317	136	266	12	GTCGCTCCTACCGATTGAATGATCCGGTGAGGCCCCCGGACTGAGGCGACGCAGCTGGTTCGCCAGAAGCGACGCTTTGGGAAGCTGTCCAAACCTTATTATTTAGAGGAAGGAGAAGTCGTAACAAGGTTTCCGT
1318	64daa88f592ba6207edce959666aca85	OTU_1318	131	266	6	CCGTCGCTCCTACCGATTGAGTGATCCGGTGAATAATTCGGACTGCGGCATTGTTCAGGTCCTGGACGTTGCTGCGGAAAGTTTAGTGAACCTTATCACTTAGAGGAAGGAGAAGTCGTAACAAGGTTTCC
1319	bb7d2e99771f6dc8768f4e4f824abf30	OTU_1319	131	266	3	CGTCGCTCCTACCGATTGGATGATTCGGTAAGCTCTATGGATCGCCGCTCTTCTCGGGTTTCCCGGAAGTTTGGTGAGAAACTGATCAAACCTAATTATCTAGAGGAAGGAGAAGTCGTAACAAGGTTTCC
1320	903145687caf1718310d98227817a341	OTU_1320	131	265	5	CGTCGCACCTACCGATTGAATGGTCCGGTGAAGCCTCGGGATTGTGATGTTTCTCCTTTATTGGGGATTTGTCGCGAGAACTTGTCTAAACCTTATCATTTAGAGGAAGGTGAAGTCGTAACAAGGTTTCC
1321	9a80c4ee49d87f01327b1f8c7be040fb	OTU_1321	131	265	1	CCGTCGCTCCTACCGATTGAGTGTTCCGGTGAATAATTCGGACTGCGATTGCGTGGGGACTCCTCATGCTGTTGCGGAAAGTCTAGTGAACCTTAACACTTAGAGGAAGGAGAAGTCGTAACAAGGTTTCC
1322	a77d6a9490d6f34d741f84ae6bf6a005	OTU_1322	126	265	2	GTCGCTACTACCGATTGAACGGTTTAATGAGTTCCGAGGAGAGGAAGCCTTGCGTCCGCGCATTGAGGCCTCAAGCAGGTGCAAATTTGATCGTTTAGAGGAAGTAAAAGTCGTAACAAGGTTTCC
1323	675324ab17b10b7ac11fa7698e490896	OTU_1323	132	265	5	GTCGCACCTACCGATTGAATGGTCCGGTGAAATCTTCGGATTGAGACTTTGATTTCTTCACGGAAAACGCTGTTTTAAGAAGTTGATTAAACCTTACCATTTAGAGGAAGGTGAAGTCGTAACAAGGTTTCC
1324	fc0c842b913a0beec5549f7740ba2f35	OTU_1324	131	265	10	CCGTCGCTCCTACCGATTGAGTGATCCGGTGAATAATTCGGACTGCGACACTGTTCAGTTCCTGAACGTTGTTGCGGAAAGTTTAGTGAACCTTATCACTTAGAGGAAGGAGAAGTCGTAACAAGGTTTCC
1325	2808d5719f370193906cbd8d704c0a20	OTU_1325	132	265	10	GTCGCTACTACCGATTGAGTGGTTTAGTGAGGACCTTGGATTGAGGCTATTGTTGCGTTCGCGCAGCATAAGTTTTAAAAAGAGGCCCAAACTTGATCATTTAGAGGAAGTAAAAGTCGTAACAAGGTTTTC
1326	8eb30b827521ebfbc3597e99fa4dd518	OTU_1326	131	265	7	CCGTCGCTCCTACCGATTGAGTGATCCGGTGAATAATTTGGACTGCAGTAATGTTTGGATCCCGAATATCGCAGCGGAAAGTTTAGTGAACCTTATCACTTAGAGGAAGGAGAAGTCGTAACAAGGTTTCC
1327	511846f963dad9b82628ac9a42402044	OTU_1327	136	264	1	GTCGCACCTACCGATTGAATGGTCCGGTGAAATTTTCGGACCGTGACAATGTCACCTTTCACTGGGAGACGCTGTTATGGGAAGTTACTTAAACCTTACCATTTAGAGGAAGGTGAAGTCGTAACAAGGTTTCCGT
1328	43581075f37ab44860842e9ce73de410	OTU_1328	131	264	8	CGTCGCTTCTACCGATTGAGTGTTTCGGTGAATACTTTGGACCGACACCTTTATGGGTTCGCTCATTTTGGTGTTGGAAAATTGAGTAAACCTCAACACTTAGAGGAAGAAGAAGTCGTAACAAGGTTTCC
1329	7839d7e2d1c1262d5c64df6b91de9080	OTU_1329	113	263	6	GTCGCTACTACCGATTGAATGGTTTAGTGAGGCCTTCGGATTGGCAACTTGTTTGCTGAAAAGTTGGACAAACTACATCATTTAGAGGAAGTAAAAGTCGTAACAAGGTTTCC
1330	52525ed487053b12ee81fc0c2a30014d	OTU_1330	132	263	3	GTCGCACCTACCGATTGAATGATTCGGTGAAAATTTCGGACTGTGTCACTGTGCCCTTCACTGGGCGTAGCGACGCGGGAAGTTATTTAAACCTCATCATTTAGAGGAAGGTGAAGTCGTAACAAGGTTTCC
1331	2c05a5426860195a480224b537bbf38f	OTU_1331	120	262	2	GTCGCTGCAACTGATTGGATGGTTTGGCGAGCTATCTGAATGCCCGGGAAGCTCCTTCCTGAGCAGAAGGATAATTAGTCAGACTCATCTAGAAATTGCAAAAGTCGTAACAAGGTTTCC
1332	ed590315c7e6fd82d340b9626a0e06aa	OTU_1332	118	261	7	GTCGCACCTACCGATGCTGCTCATCTTGAATTCGTGGGGTTGGTTGAGTTTCGTGCTTGACTGAGAACGCGCGTGAAAGCCGTGCAGTAGAGGAAGGTGAAGTCGTAACAAGGTTTCC
1333	11da5ddcd40370b6dfb0ab938c246cbd	OTU_1333	133	261	3	GTCGCTCCTACCGATTGAATGATCCGGTGAGGCCCCCGGATTGTGGCAATGGCTCTGGTTCGCCAGACCAATGCTGCGAGAAGCTGTCCAAACCTTATCATTTAGAGGAAGGAGAAGTCGTAACAAGGTTTCC
1334	bd6ec654c13e3bb83de722a4e5ad4638	OTU_1334	137	261	7	ATCACGTCACGGAAGTTAGGTCTACTGGATGGTTGTGGCCTCTGTTTAGCTGGTATTGGTACTGGGGTGCTTTTATTAGTTAATTATGTAACCGATGGCGGGTTTGGTAACTGTGACGAAGTTGTAACAAGGTACTG
1335	7d347e742628f10dc5e91e64abe06459	OTU_1335	131	261	6	CGTCGTTGCTACCGATGATGTGGAGATAGAGACTTTGGGAGAGGCTTACTAACAGCCCTCGGGCTTTAGTCAGCTTCGAACTTATCCGATATCTCCATATTAGAGGAAGCAAAAGTCGTAACAAGGTAGCT
1336	505ecb793829443b5a476995b94aec93	OTU_1336	131	261	1	CCGTCGCTCCTACCGATTGAGTGATCCGGTGAATAATTTGGACTGCAGCAATGCTTGGATCCCAAATGTTGCAGCGGAAAGTTTAGTGAACCTTATCACTTAGAGGAAGGAGAAGTCGTAACAAGGTTTCC
1337	db3e5d0a8489aa4b963e8fb75893f65a	OTU_1337	127	260	11	GTCGCACCTACCGATTGAATGGTCCGGTGAATTCTTCGGATAGCGGCTTGGCCCTCACCGGCTCGAGCTGCCAGAAGTTGATTAAACCTTGCCATTTAGAGGAAGGTGAAGTCGTAACAAGGTTTCC
1338	598fd61de095e67e79d448c1f5d2b2a9	OTU_1338	133	260	6	GTCGCTCCTACCGATTGAATGATCCGATGAATACCATGGATTGAGAGTACGAATGGGTTCGCTCATTTCTGCTGCTCGAGAAGTGGAGTAAATCTTATCATTTAGAGGAAGGAGAAGTCGTAACAAGGTTTCC
1339	ee11c85b19bc43427a70e9022cd6b411	OTU_1339	131	260	6	CGTCGCACCTACCGATTGGATGTTTCGATGAAGCCCTCGGACCGTCGCGCGTCTCCTTCACTGGCGACGCGTGGTGGGAAGTTGTCTAAATCTCAACATCTAGAGGAAGGTGAAGTCGTAACAAGGTTTCC
1340	8e8a5cfb54267a44e13152b2b90a9e8f	OTU_1340	148	260	2	GTCGCTTTTACCGATTGGAATCCGAAATGAGGTATCGGGAGAAAGAGTGATGTAAGTGGTCTGGTCTTTACGGATTAGGCCTTTTCGTTCCTTCAAACGTTCCCAAATTTCGTGTTTTAGAGGAAAAAGAAGTCGTAACAAGGTATTC
1341	38e32dd95b1d34f35bcd15c830af1f90	OTU_1341	127	259	6	GTCGCTTCTACCGATTGAGTGATCCGGTGAATAATTCGGACTGCTGTTTCATTGGTCTCCAGTGTTACGGTGGGAAGTTTCGTGAACCTTATCACTTAGAGGAAGAAGAAGTCGTAACAAGGTTTCC
1342	c47f0a889ae60acc4dc9245d171e43a6	OTU_1342	132	259	3	GTCGCACCTACTGATTGAATGACTCGGTGAAAAATTGGGACTGTGAGAACAATCGATTCATTTCGAATGTACTCGTGGGAACTTTTTTTAACCTCGCCATTTAGAAGAAGGTGAAGTCGTAACAAGGTTTCC
1343	fdf8e6a8bfc7b3fc1ff9e1ab87d2dd5e	OTU_1343	104	258	5	GTCGTTTCTTCCGACTGATACTCATTGTGAATTACGAGGATGGGCAACCTAAATCGTTGTAAATGCTGGGTATTGGAGGAAGAAAAAGTCGTAACAAGGTTATC
1344	10e97ceed38c1f4602537a5edd8dc441	OTU_1344	106	258	13	GTCACACCATGGAAGTTGGTTTTACCTTAAGGCATGTCACTAACCTTCGGGAAGTGCGTGACCACGGTATGATCGGCGACTGGGGTGAAGTCGTAACAAGGTAGCC
1345	bd01382cb852b2c5167e53716aa41db5	OTU_1345	127	258	2	GTCGCTCCTACCGATTGAGTACCACGGTGAATAATCCGGATTGCGAATGTTCGACTGTGTCGTATGTTTGTGAAAAGTTTAGTGAACCTTAGTACTTAGAGGAAGGAGAAGTCGTAACAAGGTTTCC
1346	eddc26aa31ae418c86ab3fcd60c5bea2	OTU_1346	104	258	4	GTCAAGCCACGAAAGTTGGGGGGGCCCGAAGTCGCGATGCTAACGCAAGAGGCTAGCGCCGAAGGTCAACTCGATGATTGGGACTAAGTCGTAACAAGGTAGCC
1347	278b6e8e498d1280c17bb9bb56396a23	OTU_1347	131	258	7	CCGTCGCTCCTACCGATTGAGTGATCCGGTGAATATTTCAGACTGTGCTTGGCCTCGGTCTCCGCGGCCTTGCGTGGAACGTTTCGTGAACCTTATCACTTAGAGGAAGGAGAAGTCGTAACAAGGTTTCC
1348	71129599d2f1ddc0f99a8d9c4d53808c	OTU_1348	131	258	1	CCGTCGCTCCTACCGATTGAGCAATCCGGTGAATATTTCGGACCTGATTTCATCTGAGCAATCAGTTTGAGATTGGGAAAGTCAAGTTAACCTTATTGCTTAGATGAAGGAGAAGTCGTAACAAGGTTTCC
1349	5c263555371bb3e21a3feb256d9c5c9f	OTU_1349	131	258	2	CGTCGCTACTACCGATTGAATGTTTTAGTGAGGTATTTGGATCGGCGCTTGAGAGGTTAACGCCTTTCTTGTGCTGAAAAGACTCCCAAACTTGAGCATTTAGAGGAAGTAAAAGTCGTAACAAGGTTTCC
1350	7529863b9b879cc93911ef96617bfd4a	OTU_1350	131	258	1	CGTCGCTCCTACCGATTGAGTGGTCCGGTGAATAATCTGGATGTTTGCCATGCTCTTGCATTTGGGCTGCGCTGTCACAAAGCTTGTAAACCTTATTACTTAGAGGAAGGAGAAGTCGTAACAAGGTTTCC
1351	4766b946ea4f3eaf0f058d8949b7c9af	OTU_1351	128	257	2	GTCGCACCTACCGATTGGATGGTCCGGTGAAGCCTCGGGATTGTGACCGTCGCCTTTATTGGCTTCGGCTGCGAGAACCTGTCTAAACCTTATCATCTAGAGGAAGGTGAAGTCGTAACAAGGTTTCC
1352	800ee66d182cd8826e0624d69bb3233b	OTU_1352	125	257	11	GTCGCTCCTACCGATTGAGTGATCCGGTGAATAGTTCGGATCGTGCAGGTTACCTTCGGGTTCTTGCGTGAGAAGTTCAGTAAACCTTATCACTTAGAGGAAGGAGAAGTCGTAACAAGGTTTCC
1353	1cee693796d97258dbb8cfeed2269c56	OTU_1353	133	257	5	GTCGCACCTACCGATTGAGTGGTCCGGTGAAGACCTCGGACTGTGGCTGCGGTTGCTTTATTGCGACTGTGTGCTGTGGGAAGTTGTCTAAATCTTATCACTTAGAGGAAGGTGAAGTCGTAACAAGGTTTCC
1354	ee886591ce5646adce0405b19b35647d	OTU_1354	104	257	5	GTCAAGCCACGAAAGTGGGGTGCGCCCGAAGCCGCCAAGCTAACTTCGGAGGCAAGCGTCGAAGGTGAACTCCGCGATTGGGACTAAGTCGTAACAAGGTAGCC
1355	926a93f65423a4386b92570acb0d6ff7	OTU_1355	131	257	7	GTCGCTACTACCGATTGAATGGCTTAGTGAGCTTTCTGGACTGTTGCATTTCGTGGGAGACTTCGATATGCATACGGGAAGGAAATCAAACTTGATCATTTAGAGGAAGTAAAAGTCGTAACAAGGTTTCC
1356	b1e40e52be2d924bcc1c202e4b2cd0fa	OTU_1356	108	257	6	GTCAAGCCACGAAAGTGGGGGGCATCCGAAGTCGCCGAGGTAACCCGCAAGGGAGCCAAGCGCCGAAGGTGAACTCCGCGATTGGGACTAAGTCGTAACAAGGTAGCC
1357	61225bd680c6e4f3c50174b98914f224	OTU_1357	136	257	7	GTCGCTACTACCGATTGAATGGCTTAGTGAGGAGTCTGGATTCCCGCCGCGCCTGCCGGCAACGGGAGGAGCGGGTGGGGAGAAGTTCCCCTAACTGCGTCATTTAGAGGAAGTAAAAGTCGTAACAAGGTTTCCG
1358	45bbbede7b0b1b651774333d1b931d13	OTU_1358	106	256	6	GTCACACCATGGGAGTTGACATTGGCAGAATACATTGGGCGAACCTTCGGGACGTAGGTGTGCAAGCTAGTGTCGATGACTGGGGTGAAGTCGTAACAAGGTAGCA
1359	603dda33988b28aad5432b4546706d78	OTU_1359	131	256	7	CCGTCGCTCCTACCGATTGAATGATCCGGTGAATATTTCAGACTGCGCTTGGTCTCGGTCTCCGAAGCCTAGCGTGGAACGTTTCGTGAACCTTATCATTTAGAGGAAGGAGAAGTCGTAACAAGGTTTCC
1360	c65bcc5c2bf51dfcfda0f1693e184e6a	OTU_1360	132	256	2	GTCGCACCTACCGATTGAATGGTCCGGTGAAATTTTCGGACCGTGACGATGTCACCTTTATTGGAGACGCTGTCATGGGAAGTTACTTAAACCTTACCATTTAGAGGAAGGTGAAGTCGTAACAAGGTTTCC
1361	02601e78eb39fefa7a570cf5011862bd	OTU_1361	116	256	2	GTCGCTCCTACCGATTGGGTGAGCCGATGAAACTCTCGGATGTAGGCTATTCATAGCCCGCAGAAGAGATTTGAATCGTAGCGCTTAGAGGAAGGAGAAGTCGTAACAAGGTTTTC
1362	01023adef541528530d3627abaf6e91b	OTU_1362	131	255	3	CGTCGCACCTACCGATTGAATGGTCCGGTGAAGCCTCGGGATTGTGGTTTTCTTCCTTTATTGGAAGGTAACCACGAGAACTTGTCTAAACCTTATCATTTAGAGGAAGGTGAAGTCGTAACAAGGTTTCC
1363	ec79c7100a7f6d2fef49521a50a3e3a0	OTU_1363	132	255	3	GTCGCACCTACCGATTGAATGATTCGGTGAAAATTTCGGACCGTGCCACCGTAACCTTCGTTGGGCGTGGTGATACGGGAAGTTATTTAAACCTCATCATTTAGAGGAAGGTGAAGTCGTAACAAGGTTTCC
1364	e7d60457845730928e0dc41522a02768	OTU_1364	136	254	9	GTCGCTCCTACCGATTGAATGACGCGATGAAATCCTCGGAGGTTGTGTTTGAGAACGGTTCGCTGTTCGAAAACATGACCGAAGTTGCTTGAATCTCATCATTTAGAGGAAGGAGAAGTCGTAACAAGGTCATCGT
1365	5b41f30b95c7b468b0c6529b8031d963	OTU_1365	131	254	11	GTCGCTACTACCGATTGGATGGTCTGGTGAGTCTTCCGGACTGCGGCTATGGGTCGGGCGACCGGTCCTTGCTGCGGGAAGTTACGCGAACCCTATCATCTAGAGGAAGTAAAAGTCGTAACAAGGTTTCC
1366	0777c40b0866422c8dedbb88b0dc5ea5	OTU_1366	111	254	1	GTCGCTACTACCGATTGAATGTCCTTGTGAGATCGGCTCACGCTAACGATAGGAAGCACGCCATATCAAATAAGGTCATTTAGAGGAAGTAAAAGTCGTAACAAGGTTTCC
1367	159d8a2536eb58ecf4d88b880e247e0a	OTU_1367	136	253	10	GTCGCTCCTACCGATTGAATGATCCGGTGAGGTCTTCGGACTGGGATGGTGCAGCTGGTTCGCCAGCAGCGCTGCCTCGGGAAGTTGCCCAAACCTTATCATTTAGAGGAAGGAGAAGTCGTAACAAGGTTTCCGT
1368	b53fd3e6856ef5064cebe91f7aae5128	OTU_1368	133	253	1	GTCGCTACTACCGATTGAACGTTTTAGTGAGGTATTTGGACTGAGCCTTCGGGGACATCTCGTCTCCGTTGTTGCTCGGAAAGACTCCCAAACTTGAGCGTTTAGAGGAAGTAAAAGTCGTAACAAGGTTTCC
1369	7520d33343077f73fe41996dc563e2fd	OTU_1369	132	253	2	GTCGCTACTACCGATTGAATGGCTTAGTGAACCGTTGGGATTGGCTCCTGGGAGCTGGCAACAGCATCCAGATGCCGAAAACTTCTGTAAACTTGGTCATTTAGAGGAAGTAAAAGTCGTAACAAGGTAACC
1370	2a1bedd1a36b5c644ccc3cfaa9d85ac1	OTU_1370	131	252	3	CGTCGCTCCTACCGATTGAATGATCCGGTGAATAATTTGGACTGCTCTATCAATCAGTTTGCTGGAAGATGGTGTGGTAAATCTTATGAGCCTTATCACTTAGAGGAAGGAGAAGTCGTAACAAGGTTTCC
1371	1e2f6ead6d95001ddf5c047f4960c8c9	OTU_1371	136	252	8	GTCGCTACTACCGATTGAATGGTTTAGTGAGGCCTCCTGACTGGCGCCGCTACCGCGCTCGCGCGCGGCGGCAGATGCCGGCAAGTTGGTCAAACTTGATCATTTAGAGGAAGTAAAAGTCGTAACAAGGTTTCCG
1372	37c7e28501bc174d47cc815807aebb0d	OTU_1372	106	252	2	GTCACACCATGGGAGTTGGTTCTACCCGAAGGTGGTGCGCTAACCGTAAGGAGGCAGCCAACCACGGTAGGATTAGCGACTGGGGTGAAGTCGTAACAAGGTAGCC
1373	7304a7011d8b7c790ef9df2086ebf0d5	OTU_1373	131	252	1	GTCGCTACTACTGATTGGACGTTTAAGCGAGATCTTCGGCCTCCTAGTGCATGATCTTCGGTGATTGCGCAGTGGCGAAAGTAGATCGAGCTTATGTGTCTAGAGGAAGTAAAAGTCGTAACAAGGTTTCC
1374	20c4422eece1909866f69cf970cde925	OTU_1374	106	251	1	GTCACACCATGGGAGTTGGTCTTACCCGACGGCGCTGCGCCAACCGCAAGGGGGCAGGCGACCACGGTAGGGTCAGCGACTGGGGTGAAGTCGTAACAAGGTAGCC
1375	88a243c997a25265a31e38271190777d	OTU_1375	100	251	8	GTCACACCATGGGAGTTGAACTCATTCGAAGCGGGGATGCTAAAGTAGCTACCCTCCACAGTGGATTCAGCGACTGGGGTGAAGTCGTAACAAGGTAACC
1376	3c7f103872fb5d25f4cf8e11cc905413	OTU_1376	131	251	6	GTCGCTCCTACCGATTGAGTGGTCCGGTGAGGCTTTGGGAGGGCTGGATGGATTGTGTTTCACAAACTGTTCGGTCTGAACTTAGTCAAACCTTACTACTTAGAGGAAGGAGAAGTCGTAACAAGGTTTCC
1377	6a85d4f56e01a369d211bd112d4bb410	OTU_1377	131	251	3	GTCGCTCCTACCGATTGAGTCATCCGGTGAGCAGTTTGGATTGCGATTAGGTCGTGGCTTGCCACTCTTAGTTGCGAGAAGCTCTGCGAACCTTGTGACTTAGAGGAAGGAGAAGTCGTAACAAGGTTTTC
1378	5b29af25c98689ff871e3fdb738b38a3	OTU_1378	141	251	1	GTCGCTACTACCGATTGAATGATTTAGTGAGGTCAACGGATTGGCCGGTGGAACTTGCCCTTCGCGGGGTGGGTACCGCTGCGCTGAGAAGTCGCCCGAACTTGATCATTTAGAGGAAGTAAAAGTCGTAACAAGGTTTCC
1379	1138cf88e8618891274b7ab0980a86ff	OTU_1379	106	251	3	GTCGTTTCTTCCGACTGATACTCATTGTGAGTTGCAAGGATCCTTCATTGGAGAATTGCTACAAATGCTTTGTATTGGAGGAAGAAAAAGTCGTAACAAGGTTATC
1380	16deaa8aa6c2f9b32f589727b9d619c8	OTU_1380	131	250	2	CCGTCGCTCCTACCGATTGGACGACCTGCTGACTACTTCGGACCGCCTGCTCTGCCAGCTCTGGTTTGGGCAGATGGAAAGTTGAGGGAAGCTGAGCGTCTAGAGGAAGGAGAAGTCGTAACAAGGTTTCC
1381	6fee4e33ccce2f9d8e58c6bf76880a59	OTU_1381	136	250	6	GTCGCTACTACCGATTGAATGGTTTAGTGAGACCCTCGGATTGGTCCCGACATGGCTGGCGACAGCCGGGTCGTGGCGCCGAAAAGACGGTCAAACTTGACTATTTAGAGGAAGTAAAAGTCGTAACAAGGTTTCC
1382	fa0e18082c98236c9bc24249182b9e13	OTU_1382	132	250	5	GTCGCACCTACTGATTGAATGACTCGGTGAAAAATTGGGACTGTGAAAACAATTGATTCAGTTCAAATGTATTTGTGGAAACTTTTTTTAACCTCGTTATTTAGAAGAAGGTGAAGTCGTAACAAGGTTTCC
1383	829ddbcf26c919c7b8ed2020337c774d	OTU_1383	132	250	9	GTCGCACCTACCGATTGAATGGTCCGGTGAAATCTTTGGACTGTGACTTTGTCTTGTTTACTCAAGACGTTGTCGCGGGAAGTTGATTAAACCTTACCATTTAGAGGAAGGTGAAGTCGTAACAAGGTTTCC
1384	9f01fc1a48574bf0914e7b6f2fd0af51	OTU_1384	128	249	2	GTCGCACCTACCGATTGGATGGTCCGGTGAAGCCTCGGGATTGTGACTGGTGCCTTTATTGGTGTTGGTTGCGAGAACTTGTCTAAACCTTATCATCTAGAGGAAGGTGAAGTCGTAACAAGGTTTCC
1385	d4cfb42aa87716f0250fa946d2324c1a	OTU_1385	131	249	9	CCGTCGCATCTTCCGATTGTGCGAAACGATGAAGTCTCGGGACTGCGTTGACTTCCTTCATTGGATGTCATTTGCAGGAACTCGCCTGAATCCCATCGCATAGAGGAAGATGAAGTCGTAACAAGGTTTCC
1386	209ba26169458a4209852f0f74b82398	OTU_1386	131	249	9	CCGTCGCTCCTACCGATTGAGTGATCCGGTGAATAACTCGGACTGATGCAGTGATCAGCTTCTGAACGTTGCATTGGAAAGTTTAGTGAACCTTATCACTTAGAGGAAGGAGAAGTCGTAACAAGGTTTCC
1387	58a6134dba24c345f2468027a3d09e80	OTU_1387	131	249	2	CGTCGCTCCTACCGATTGAGTGATCCGGTGAATAATTCGGACCTGTCGATGCATGAGTTCGCTCACGCATTGACGGGAAAGTCTAGTGAGCCTTATCACTTAGAGGAAGGAGAAGTCGTAACAAGGTTTCC
1388	e6049f0b73c9058c04b346c44d793494	OTU_1388	132	248	7	GTCGCTACTACCGATTGAATGGCTTAGTGAGACCTCCGGATCGATAATTAGAACTTGGCAACAGGATCCATTTGTTGAAAAGTTGGTCAAACTTGGTCATTTAGAGGAAGTAAAAGTCGTAACAAGGTAACC
1389	f24b916067ada7abeb71ee272165ef27	OTU_1389	132	248	9	GTCGCTCCTACCGATTGAATGATCCGGTGAGGCCCCCGGAATGGGATCACTGCCTGGTTCGCCAGAATGAGATCCTGTGAAGCTGTCCAAACCTTATCATTTAGAGGAAGGAGAAGTCGTAACAAGGTTTCC
1390	669bdfbc0ef9a1007f2a7e2e8ba3bc9a	OTU_1390	114	248	3	GTCGCTCCTACCGATCGAGTCATCCGGTGAGTTGTTTGGATTGTGTCGTTTACCGTCCAAAAAGTCCAGCAAACCATATGTCTTAGAGGAAGGAGAAGTCGTAACAAGGTTTCC
1391	76073c24f1c4f0b6746d7c6bf2a724ab	OTU_1391	131	247	6	CGTCGCACCTACCGATTGAATGGTCCGGTGAAGCCTCGGGATCGTGGACTGGTTCCTTTATTGGAAGCTGACTGTGAGAACTTGTCTGAACCTTATCATTTAGAGGAAGGTGAAGTCGTAACAAGGTTTCC
1392	2dd5bf4dc3ab7541458d456ebfa20435	OTU_1392	133	247	4	GTCGCACCAACCGATTGGATGTTTTGTTGAAATATGTGGGTATCTTTGTGGATGGTTTGATTACTGTCTGTTGAGGGTAGAAGTGTATTAAAACTGAATATCTAGAGGATGGTGAAGTCGTAACAAGGTTTCC
1393	8e2218ea33975ea356204923de9a00e5	OTU_1393	133	247	5	GTCGCTCCTACCGATTGAATGGTCCGATGAAAACTATGGATTGAGCGTATGAGCAGCATTTGTTGCTTACGCGTCTCGAGAAGTAGTTTGAACCTTATCATTTAGAGGAAGGAGAAGTCGTAACAAGGTTTCC
1394	ef6c8fbb5ac358f8070e3b5b69ded8ea	OTU_1394	136	247	6	GTCGCTACTACCGATTGAATGGTTTAGTGAGACCCTCGGATTCGTCCCAGCAGGGTGGGTCACCACCCTATTGGTGTGCGAAGAAGACGGTCGAACTTGATCATTTAGAGGAAGTAAAAGTCGTAACAAGGTTTCC
1395	1f4118da4bd7ffed367d14631b16922e	OTU_1395	106	247	5	GTCACACCATGGGAGTTTGTTGCACCAGAAGTGGATAGTCTAACCGCAAGGAGGACGTTCACCACGGTGTGGCCGATGACTGGGGTGAAGTCGTAACAAGGTAGCC
1396	cbc8f5e6c82c330a687ff1d23753177d	OTU_1396	127	247	3	GTCGCTCCTACCGATTGAATGGTCCGGTGAAATCTTCGGATTGCTGGATAGGAGGGCAACCACCTATCTGCGAGAAGTTGCTTGAACCTTATCATTTAGAGGAAGGAGAAGTCGTAACAAGGTTTCC
1397	b427e4b03fd136a9eab4d9c6e6c865ac	OTU_1397	132	246	3	GTCGCACCTACCGATTGAATGACTCGGTGAAACATCGGGACCGCGGTCTAATTAGATTTATTTCTAATTGTTTCGTGGAAACTTTAGTAAACCTATTCATTTAGAGGAAGGTGAAGTCGTAACAAGGTTTCC
1398	3bd8cd2b488df7180b8b8edcfbe10496	OTU_1398	124	246	6	GTCGCTCCTACCGATTTCGAGTGGTCCGGTGAATCTTTCGGACTGCGCGCGGCTTCGTGCCGCGTCGCGGAAAGTCTGGTAAACCTTATCACTTAGAGGAAGGAGAAGTCGTAACAAGGTTTCC
1399	be4feba56df312678b2b53e6cbf79b63	OTU_1399	105	246	1	GTCACACCATGGGAGTGTATAGCACCAGAAGTGGGTAGTCTAACCTTCGGGAGGGCGCTCACCACGGTGTGGTCCATGACTGGGGTGAAGTCGTAACAAGGTAGC
1400	0f954bc571dfe3e22e6d25d0665af78e	OTU_1400	121	245	12	GTCGCTCCTACCGATTTCGGGTGATTCGGTGAACCATTTGGACCGCGAAGGCCTCGAGTCATTGTGGAAAATCTAGTAAATCCAATCACCTAGAGGAAGGAGAAGTCGTAACAAGGTTTCC
1401	eedc4f80088599770679798a7d9951fb	OTU_1401	102	245	2	GTCGTTTCTTCCGACTGATACTAATCGTGAGTTGCAAGGACGTCACTGAAATTGCCGCGAACGCTTTGTATTGGAGGAAGAAAAAGTCGTAACAAGGTTATC
1402	132cc204ed9f288def888383d94ac7d8	OTU_1402	108	244	3	GTCACATCATGGAAGCGGATTGCACCCGAAGCCGGTGGTCTAACCTTTATTGGAGGAAGCCGTCGAAGGTGTGGTTGGTAACTGGGATGAAGTCGTAACAAGGTAGCC
1403	02b23665580c7b035cf4044de115b3ae	OTU_1403	114	244	1	GTCGCTACTACCGATTGAATGGTTTAGTGAGGCCTTCGGATTGGCAAACTTGTTTGCTGAAAAGTTGGACAAACTACATCATTTAGAGGAAGTAAAAGTCGTAACAAGGTTTCC
1404	28a0eba48f048049dfb0c541868a6fec	OTU_1404	202	244	1	GTCGTAAGTAGCATATGATTGCTTGACCCCCTGTCAAACACTGAAGAAACGAACCAATTTCTAACATTCTCTTCTAGGCACCTACCGATTGAATGGTCCGGTGAAGCCTCGGGATTGTGGCTCTCGCCTTCACGGGTGGAAGCTGCGAGAACTTGTCTAAACCTTATCATTTAGAGGAAGGTGAAGTCGTAACAAGGTTTCC
1405	37bb8345c4faf39af52b9de6817c4f0a	OTU_1405	128	244	9	GTCGCACCTACCGATTGGATGGTCCGGTGAAGCCTCGGGATTGTGATGGTTGCCTTTATTGGTGTCCGTTGCGAGAACTTGTCTAAACCTTATCATCTAGAGGAAGGTGAAGTCGTAACAAGGTTTCC
1406	cadaf9be9b43cc97d975df107a74915e	OTU_1406	131	243	4	CGTCGTTACTACCGATTGAATGGCTTAGTGAGATCCTAGGAGAGTTTGCGCACGAGGGCAACCTCTAGCGCGAGTTCGAATTCGATCAAACTTGGTCATTTAGAGGAAGTACAAGTCGTAACAAGGTTTCC
1407	84c522bd1b94a9b90df8f2e4a9f4cedc	OTU_1407	132	243	1	GTCGCTACTACCGATTGAATGGTTTAGCGAGATTCTCGGATCGGGCCTTGTTCGTGCGCAAGCATGGACGAGATCTGAAAAGAAACTCAAGCTTGATCATTTAGAGGAAGTAAAAGTCGTAACAAGGTTTTC
1408	efb7dd8ed72b3bcaa7b9ea9c4553e253	OTU_1408	113	242	2	GTCAAGCCACCCAAGCAGGATGCACCCGAAAACATTATCTCTAACCAGGGTAACTTGGAGGAAGATGTTGAAGGAGTGTTTTGTGAGGAGGACTAAGTCGTAACAAGGTAGTC
1409	3a0a529e6e66250c857b9e4a85e5df93	OTU_1409	133	241	10	GTCGCTACTACCGATTGAATAACAGGGTGAAATCTTCGGACCGTGGCATTCATTTGGCCTAGCCAAATCTTGCTCGTGGGAGGTCGCTTAAATCCTGTTATTTAGAGGAAGTAAAAGTCGTAACAAGGTTTCC
1410	438d2f898d9796cee0cf6b3ab28ae9c3	OTU_1410	131	241	8	CGTCGTTGCTACCGATTGGCTGTAGGATAGAGCTGGACGGAGATGCTCGTTGGGGGCCTTGTACCACTTCGAGTGTCGAATTTCAGCAATATTTTTCAGCTAGAGGAAGCAAAAGTCGTAACAAGGTTGCT
1411	49ac4d990e4665029514be5cf7b88842	OTU_1411	133	241	2	GTCGCTACTACCGATTGAATGGTTTAGCGAGAACCTCGGATCGAATCCTCGTCGTGTGCAAACATGACGTTGGGTATGAAAAGAAGTTCAAGCTTGATCATTTAGAGGAAGTAAAAGTCGTAACAAGGTTTTC
1412	5d485977bf39cd4ad29d641fd70d0879	OTU_1412	133	241	1	GTCGCTCCTACCGATTGGGTGATTCGGTGAGCTCTTGGGATCGTTGATTTTGTTTCTCGTTAAGAGATCTTTTTCATGAAAACTTGATCAAACCTAATCACCTAGAGGAAGGAGAAGTCGTAACAAGGTTTCT
1413	dcace6bc6e88b95059da16bc4128c662	OTU_1413	133	240	5	GTCGCACCTACTGATTGAATGACTCGGTGAAAAATTAGGACTACGTTGGCGTCTTGCTTCATTGCAAGTGCTATTGTGGGAATTGTTTTAAACCTCGCCATTTAGAAGTCGGTGAAGTCGTAACAAGGTTTCC
1414	dce2cf3212e43704f6289d01d813adcb	OTU_1414	128	240	1	GTCGCACCTACCGATTGGATGGTCCGGTGAAGCCTCGGGATCACAGCTAATGTCTTCATTGGTGTTGGCTGTGAGAACTTGTCTAAACCTTATCATCTAGAGGAAGGTGAAGTCGTAACAAGGTTTCC
1415	691e9b0a803ce585f4876cdad637c5b5	OTU_1415	131	240	8	GTCGCTCCTACCGATTGAGTGGTCCGGTGAGGCTTTGGGATTGCGATGGAAAGAGCGTTTCGCTCGTTCTGTTGTGAGAACTCAGTCGAACCTTATCATTTAGAGGAAGGAGAAGTCGTAACAAGGTTTCC
1416	3325892f33007df51d55853685f4ecbf	OTU_1416	132	240	5	GTCGCTCCTACCGATTGAGTGTTCCGTTGAGAATCCCTAAACTGCTTTACTATGCTCTATAATCTTATGTATAGTGGTAACGTTGTACAAATCTTGTCATTTAGAGGAAGGAGAAGTCGTAACAAGGTTTCC
1417	dc0ee9abadd8cd814e69a6470dc33121	OTU_1417	110	239	7	GTCACATTCTGGGAGTTGATTTTATTTAAAGCTAATCTCCTAACCTTCTTGAAGGAGGGAATTTGTAAGAATGAAAACGATGACTGGAATGAAGTCGTAACAAGGTAGCC
1418	7a49bb73f94ef7a5a79a84640858c011	OTU_1418	136	239	2	GTCGCACCTACCGATTGAATGGTCCGGTGAAATCTTTGGACTATGACATTGTCTCGCTTTCGGGCAAGACGTTGTCGTGGGAAGTTGATTAAACCTTACCATTTAGAGGAAGGTGAAGTCGTAACAAGGTTTCCGT
1419	fd2eacd8651fef8a5e45a8aa8d272f68	OTU_1419	106	238	1	GTCACACCACGAAAGTTGGTTGTTCCAGAAGTAGTTGCGCTAACCTTCGGGAGGCAGGCTACCAAGGAATGGCTGGTAATTGGGGTGAAGTCGTAACAAGGTATCC
1420	c3f18a5ccb934658008f04dcd41dce1a	OTU_1420	106	238	5	GTCACATCACGAAAGCTGGTTGCACCTGAAAACGGTGGGCTAACCCTCGGGAGGTAGCCGTTTACGGTGTGATTGGTGATTGGGGTGAAGTCGTAACAAGGTAGCT
1421	475e2d8219963a2cb22342b666b2f5cc	OTU_1421	131	238	1	CGTTGCTACTACCGATTGAACATTTTAGTGAGGTCCTCGGACTGTGAGCCTGGCGGGTCGCCCTGCCTGGTCTACGGGAAGACGACCAAACTGTAGTGTTTAGAGGAAGTAAAAGTCGCAACAAGGTTTCT
1422	39ca12149756e0b923dc45f8821ba5af	OTU_1422	136	238	3	GTCGCTACTACCGATTGAATGGTTTAGTGAGATCTTTGGATTGGCGCTGAAGAGGTGGCAACACTTTTTCAGACTGCTGAGAAATTGCTCAAACTTGATCATTTAGAGGAAGTAAAAGTCGTAACAAGGTTTCCGT
1423	f253208d788fb1de2f804b34fb57154e	OTU_1423	136	238	5	GTCGCTACTACCGATTGGATGGTTTAGTGAGACCCACGGATTGGTCCCAGCATGGCGGGTTACCGCCGCGCTGGCGCGCCGAGAAGTCGGTCGAACTTGATTATCTAGAGGAAGTAAAAGTCGTAACAAGGTTTCC
1424	845b7344235f53c0242da5b27794706b	OTU_1424	106	237	1	GTCACATCACGAAAGTTAGTTGCTCTTGAAGTCGCTGAGCTAACCGCAAGGAGGCAGGTGCCGACGGAGTGGCTGGCGATTGGGGTGAAGTCGTAACAAGGTAGCT
1425	753185ba639a173b580721784f05705e	OTU_1425	132	237	1	GTCGCTACTACCGATTGAACGTTTTAGTGAGGTCCTCGGACTGTGAGCCTGGCGGGTCATTCTGCCTGCCGTCACAGGGAAGACGACCAAACTGTAGCGTTTAGAGGAAGTAAAAGTCGTAACAAGGTTTCC
1426	d1e3dccb65ff4529397b6698d13bb844	OTU_1426	131	237	3	CGTCGCTACTACCGATTGAACGTTTTAGTGAGGTATTTGGATCGGCGCTTCGGAGGTTTGCGCCTCTGTTGTGCTGAGAAGACTCCCAAACTTGAGCGTTTAGAGGAAGTAAAAGTCGTAACAAGGTTTCC
1427	eda4062f99988a5c1186e929f4aa8a47	OTU_1427	133	236	7	GTCGCTCCTACCGATTGAATGGTCCGATGAAAACTATGGATTGAGCGTATGAGTGGCATTTGTCACTTCCGCGTCTCGAGAAGTAGTTTGAACCTTATCATTTAGAGGAAGGAGAAGTCGTAACAAGGTTTCC
1428	31dacf7f753f8705c28c0f9f1777443f	OTU_1428	143	236	1	GTCGCTACTACCGATTGAATGGTTTAGTGAGGCCCTCGGACGGGCCCCGGGCTGGCGGGCAACCCCCGCCGGCTGTCTTGGCGTGCCTGAAAGACGGTCGAACTTGATCATTTAGAGGAAGTAAAAGTCGTAACAAGGTTTCC
1429	11f5de10fed35d299c9006b210d5dbeb	OTU_1429	124	236	3	GTCGCTCCTACCGATTTCGAGTGGTCCGGTGAATCTTTCGGACTGCGCGCGGCTTCGTGCCGTGTTGCGGAAAGTCAGGTAAACCTTATCACTTAGAGGAAGGAGAAGTCGTAACAAGGTTTCC
1430	d8a3b78f236841a927914f39881c59d7	OTU_1430	131	235	1	CGTCGCACCTACCGATTGAATGTCTCGGTGAAATCCCCGGACTATCGCTTAGAGACCCTCGGGTCCCTTCGCAGTGGGAAGCGGATTAAACCTCGATATTTAGAGGAAGGTGAAGTCGTAACAAGGTCTCC
1431	ec1b29a072cc1d867eba1be69ea208ff	OTU_1431	133	235	9	GTCGCTCCTACCGATTGAATGATCCGGTGAGCTTTTTGGACCTTTTTTCCGGCATTGGTTCGCCAATCTGGAGAAGGGGGAAGATACGCAAACCTTATCATTTAGAGGAAGGAGAAGTCGTAACAAGGTTTCC
1432	c19d4e287e8bfd5b1e53cfc209dd3214	OTU_1432	132	235	9	GTCGCTCCTACCGATTGAATGATCCGATGAATATCATGGATTGAGGATGCAAGTAGGTTCACCTATCTTCATCTTCGAGAAGTGAAGTAAATCTTATCATTTAGAGGAAGGAGAAGTCGTAACAAGGTTTCC
1433	f74088947b2094a646ea6d9cab979979	OTU_1433	131	235	4	CCGTCGCTCCTACCGATTGAGCAATCCGGTGAATATTTCGGACCGGACTCCGTCGGGGCAACTCGTTCGGAGACTGGAAAGTCAAGTTAACCTTATTGCTTAGAGGAAGGAGAAGTCGTAACAAGGTTTCC
1434	614b95a87579746151aa8dcacc953d22	OTU_1434	136	235	2	GTCGCTACTACCGATTGAATGATTTAGTGAGGTCTTCGGACTGGCTAGTTCGACTACTTCGTGTGGAAGGACCCTGCTGGAAAGATGACCAAACTTGATCATTTAGAGGAAGTAAAAGTCGTAACAAGGTTTCCGT
1435	1dee6815806f4a464816e1ccc1e4382b	OTU_1435	131	234	5	GTCGCTACTACCGATTGGACGTTTTAGTGAGACATTTGGACTGGGTTAAGATAGTCGCAAGACTACCTTTTCTCCGGAAAGACTTTCAAACTTGAGCGTCTAGAGGAAGTAAAAGTCGCAACAAGGTTTCC
1436	164a3fcff497fee6e82aa113b51f85e4	OTU_1436	128	234	1	GTCGCTCCTACCGATTGAGTGATCCGGTGAATTATTCGGACTGCAACGCAACCAGTTCCTGGATGCAGTTGCGGAAAGTTTTGTGAACCTTACCACTTAGAGGAAGGAGAAGTCGTAACAAGGTTTCC
1437	6737130a5d2c9b33ea3f7666966bccd8	OTU_1437	133	234	1	GTCGCTACTACCGATTGAACGTTTTAGTGAGGTATTTGGACGAGGCCTTTCGAGGTTTTTAATCTCGTTCGTTGCCTTGGAAGACTCCCAAACTTGAGCGTTTAGAGGAAGTAAAAGTCGTAACAAGGTTTCC
1438	0554fa879ff247ebdb6efe279fb66640	OTU_1438	131	233	1	CCGTCGCTCCTACCGATTGAGTGATCCGGTGAATAATTCGGACTGCAGCAGTGATCGGTTCCTGAACGTTGCAGCGGAAAGTTTAGTGAACCTTATCACTTAGAGGAAGGAGAAGTCGTAACAAGGTTTCC
1439	083972e05c22d99dce0a2ca26f47efb9	OTU_1439	133	233	5	GTCGCACCAACCGATTGGATGTTTTGTTGAAATATGTGGGTATCTTTGTGGATGGTTTGATTACTGTCTGTGGAGGGTAGAAGTGTATTAAAACTGAATATCTAGAGGATGGTGAAGTCGTAACAAGGTTTCC
1440	923815afc95ea2fbd9823d9d5bbcb7e7	OTU_1440	136	233	3	GTCGCTACTACCGATTGAATGGTTTAGTGAGGTCCTCCGACTGGATCTGGCACGGTCGGCGACGGCCGAGCCGGGGCCCGGAAAGACGATCTAACTTGATCATTTAGAGGAAGTAAAAGTCGTAACAAGGTTTCCG
1441	f5c5db5b28b87003cc2a69281a8f0d19	OTU_1441	132	233	1	GTCGCTACTACCGATTGAATGGTTTAGCGAGATGCTCAGATCGAGTCTTGATCGTGCGCAAGCATGGCCGTGACTTGAGAAGAAGTTCAAGCTTGATCATTTAGAGGAAGTAAAAGTCGTAACAAGGTTTTC
1442	e2daed1e36022ae26f22ab525d3aadd3	OTU_1442	132	233	3	GTCGCTCCTACCGATTGAGTGGTCCGGTGAGGCCTTGGGAGGGCTAAGTAAACTGTGTTTTCATGGATTACCTGGCCCGAACCTGGTCAAACCTTATCACTTAGAGGAAGGAGAAGTCGTAACAAGGTTTCC
1443	c7c6aaaa22555d3a732700b6ddfe076c	OTU_1443	107	232	6	GTCACACTCTGGAAGTTGATCTTAATTGAAGCTTATAACCTAACCTTTTTGGAGGGTGTATGTGAGATTGAGGAGAGCGACTGGAGTGAAGTCGTAACAAGGTAGCT
1444	c3838e4a166896f3bcd28788e2f61358	OTU_1444	131	232	1	CGTCGCACCTACCGATTGAACAGTCCGGTGAAATCTTCGGAGTTTTCTCTGCGTCGTTTATTCGTCTCGTTGAAGGCAAAGTTGAATGAACCTTATTGTTTAGAGGAAGGTGAAGTCGTAACAAGGTTTCC
1445	1e9ca6bb74c58abe8e98c7e3c46745fb	OTU_1445	131	232	1	CGTCGCTACTACTGATTGGACGTTTAAGCAAGATTTTTGAACACTGGCAGTTGATACTTCGGTAGACGCAGTGGGAAGAAGAAGATCGAGCTTAGTTGTCTGGAGGAAGTAAAAGTCGTAACAAGGTTTCC
1446	ebf58ffc8faea90f7e1b1dafdbd69c62	OTU_1446	125	232	10	GTCGTTGCCTGTAATGGGTTGTGAGTAGAGCCCTTTGGAGATTAGAAGATGGGGCAACCTGTCTTCGGATCAAATTTGGGCAATACTTGCAATCTAGAAGAGGCAAAAGTCGTAACAAGGTTGCT
1447	98ccbc453866bf14ebd1ca97255595ad	OTU_1447	105	231	1	GTCGTTTCTTCCGACTGATACGAATTGTGAGTTACAAGGACCTTTCTGAGGAAATTGCCGCGAATGCTTCGTATTGGAGGAAGAAAAAGTCGTAACAAGGTTATC
1448	5a4f2bce9b3fa45e28e68bfe737fe64f	OTU_1448	124	231	4	GTCGCTCCTACCGATTTCGAGTGGTCCGGTGAATCTTTCGGACTGTGCGTGGTCCTGTGCCATGTCGCGGAAAGTCAGGTAAACCTTATCACTTAGAGGAAGGAGAAGTCGTAACAAGGTTTCC
1449	d420acb29338f254eb4269c3dbf859f1	OTU_1449	131	230	11	GTCGCTACTACCGATTGGATGGTCTGGTGAGTCTTTCGGACTGCGACTATGGCGTGAGCAATCATGCTTTGTTGCGGGAAGTCACGCAAACCCTATCATCTAGAGGAAGTAAAAGTCGTAACAAGGTTTCC
1450	f415c6b5729a6e27b32d2dd11e0aabeb	OTU_1450	133	230	8	GTCGCTACTACCGATTGAACATTTTAGTGAATTCCGAGGATTTGGTTCATCTGGTTCCCTGTGGATCAGCTGAACTGGAGAGCAGGTGTAAACTTGAGTGTTTAGAGGAAGTAAAAGTCGTAACAAGGTTTCC
1451	5d00d0744f575c681621fdf2daaa251d	OTU_1451	136	230	4	GTCGCTACTACCGATTGGATGGTTTAGTGAGACCCTCGGATTGGTCCCGACATGGCTGGCAACAGCCGGGTCGTGGCGCCGAAAAGACGGTCAAACTTGACTATCTAGAGGAAGTAAAAGTCGTAACAAGGTTTCC
1452	5d1088642547c1c162849955da6d5339	OTU_1452	131	230	2	CGTCGCTACTACCGATTGAATGGTTTAGTGAGATCTCGGGATTGGAGACGTTGCGCCGCAAGGCACACCGTCCTCGAGAACTTGATCAAACTTGATCATTTAGAGGAAGTAAAAGTCGTAACAAGGTTTCC
1453	65074c68e7bd9596a1d8a09a644907de	OTU_1453	106	230	1	GTCAAGCCACGAAAGGGAGGGGCGTCCGAAGTCGCCGCGCCAACCGCGAGGGGGCAGGCGCCGAAGACGAAACTCCTGATTGGGACTAAGTCGTAACAAGGTAACC
1454	3809b7d406a2bfd596707c4601718a0c	OTU_1454	131	229	11	CCGTCGCTTCTACCGATTGAGTGTCTCGGTGAATACTTTGGACTGATCCTGTTCCGGTTCGCCGGTTCATGGATCGGAAAATTGAGTGAACCTCGACACTTAGAGGAAGAAGAAGTCGTAACAAGGTTTCC
1455	9415ac4de779f6c06de7f92606c9fa0c	OTU_1455	131	229	1	CGTCGCTCCTACCGATTGAATGTGCCAGTGAAAAGTTCGGATTGGGCGTGGGAGACGGCAACGTATCCCACATCCGAGAAAATCTTTAAACTTTCCCATTTAGAGGAAGGAGAAGTCGTAACAAGGTTTCC
1456	e8e6a0884f6a14e124f98f35b6a793de	OTU_1456	136	229	4	GTCGCTCCTACCGATTGAACGATGTGATGAAATCTTCGGAGTTGAGCTTTGCGTCCAGTTCTCTGGACAAAAAGCTCGGCAAAGTTGCGTGAATCCCATCGTTTAGAGGAAGGAAAAGTCGTAACAAGGTTTCCGT
1457	ea807f39b02b2917a6c342350230fc86	OTU_1457	131	229	4	CGTCGCTCCTACCGATTGGATGAATCGATGAGCCCTTTGGAGAGCGCTAGTGAAGGTTTCGGCTGGAACTAATGCTTGAAATTGTGCAAATCTGTTCATCTAGAGGAAGGAGAAGTCGTAACAAGGTTTCC
1458	c21f127797865f6b443b2b6a2c3797db	OTU_1458	131	229	13	CGTCGCTACTACCGATTGAACGTTTTAGTGAGGTATTTGGATTGGACTTCGGCAGGGCTTCCCTTCCGTTTGTCCGAGAAGACTCCCAAACTTGAGCGTTTAGAGGAAGTAAAAGTCGTAACAAGGTTTCC
1459	fbd99d795a590cd735ab19234107c4db	OTU_1459	136	229	7	GTCGCTACTACCGATTGAATGGTTTAGTGAGATCTTCGGATTGGAGTCCTCGGTGGCGGCGACGCCGCCTTGGGCACCCGAGAAGTTGAGCTAACTGAATTATTTAGAGGAAGTAAAAGTCGTAACAAGGTTTCCG
1460	e467556d7e908d01a31d9327b1e9a9d3	OTU_1460	107	228	3	GTCAAGCCACGAAAGTTGGGAGGGCCCGAAGTCGCTGAGCTCACTCTCTGAGAGGCAGGCGCCGAAGGTCAGCTCGACAATTGGGACTAAGTCGTAACAAGGTAGCT
1461	5d3b28aca33b5d7b1a07f21c4ceb01aa	OTU_1461	124	228	1	GTCGCTCCTACCGATTTCGAGTGGTCCGGTGAATCTTTCGGACTGCGCGTGGCTTCGTGCTTTGTCGCGGAAAGTCAGGTAAACCTTATCACTTAGAGGAAGGAGAAGTCGTAACAAGGTTTCC
1462	f51c3d44a2078db80457551ecd4efbe9	OTU_1462	136	228	2	GTCGCTACTACCGATTGAATGTTCTGGTGAAATCATCGGAATGGCACCGACCGGGTGGTCTCCACTCGATCGGACGCTGTGAAGACGCTTAAACCTGAGCATTTAGAGGAAGTAAAAGTCGTAACAAGGTTTCCGT
1463	a24254ea3e8b125280f1d0f8c4d58b6d	OTU_1463	106	228	6	GTCACATCACGAAAGTGGGTTGTACTAGAAGTCGCCGGCCTAACCTTCGGGAGGGAGGCGCCGACGGTATGATTCATGATTGGGGTGAAGTCGTAACAAGGTAGCT
1464	27d35a4085d04d779f173848588fd11e	OTU_1464	132	228	7	GTCGCACCTACCGATTGAATGGTCCGGTGAGAATTTTGGATTGATGTTTCGTCGGGTTAACGCCAGACTTTACGTTGAGAAGTTATTCAAACCTTACCATTTAGAGGAAGGTGAAGTCGTAACAAGGTTTCC
1465	f2f6a4d69ef1597a9dd7796b3758356e	OTU_1465	131	228	5	CGTCGCACCTACCGATTGAATGGTTCGGTGAAAATCTCGGACTGCGGCTTGGATGCCTTCGGGCAACCTCGCTGTGGAAAGTTGTTTAAACCTCATCATTTAGAGGAAGGTGAAGTCGTAACAAGGTTTCC
1466	8e262b072aadd96a53a3b7517f2ef8d0	OTU_1466	131	228	3	CGTCGCACCTACCGATTGAATGGTCCGGTGAAGCCTCGAGATTGTGGTTAGTTTCCTTTATTGGATATTAACCACGAGAACTTGTCTAAACCTTATCATTTAGAGGAAGGTGAAGTCGTAACAAGGTTTCC
1467	44488dd98f095bf5dd51b4b22326b331	OTU_1467	122	228	1	GTCGCTCCTACCGATTGAGTGATCCGGTGAATAATTCGGACTGTGACACATCAGCTGATGCGTCGCGGGAAGTTTAGTGAACCTTATCACTTAGAGGAAGGAGAAGTCGTAACAAGGTTTCC
1468	af37835a937093fe8c2d4b7cc62a22f0	OTU_1468	110	228	1	GTCACACCATGGGAGTTGGATTCACCCGAAGGTGGTGCGCTAACCTGCTTGCAGGAGGCAGCCAACCACGGTGGGTTCAGCGACTGGGGTGAAGTCGTAACAAGGTAGCC
1469	99be4c2156728be8b978dce99e687206	OTU_1469	133	228	2	GTCGCACCTACCGATTGAATGGTCCGGTGAATTCTTCGGACTGAGACTATGACTTACTTTCGGGTAAACATGGTCATGGAAAGTGGATTAAACCTTATCATTTAGAGGAAGGTGAAGTCGTAACAAGGTTTCC
1470	338d87afa3902cfb8ff0152bae40e9dd	OTU_1470	139	227	1	GTCGCTACTACCGATGAACGGTTCAGTGAGGCCTTCGGAAGTCCCCCGGGCTGGTGGTTCTCTGCCAGCTGTCTGGTTGCGGACCAAAGACGGTCGAACTCAATCGTTTAGAGGAAGTAAAAGTCGTAACAAGGTTTCC
1471	0ca1020ce72e889c8f1e5cbe79697de2	OTU_1471	128	227	1	GTCGCACCTACCGATTGGATGGTCCGGTGAAGCCTCGGGATTGTGACTTGTGCCTTTATTGGTGTTGGTCGCGAGAACTTGTCTAAACCTTATCATCTAGAGGAAGGTGAAGTCGTAACAAGGTTTCC
1472	31ca7515489ad9dac63ad7559ba216de	OTU_1472	131	227	4	CCGTCGCTCCTACCGATTGAGTGATCCGGTGAATAATTCGGACTGCAGCAGTGTTCAGTTCCTGGACGTTGCAGCGGAAAGTTTAGTGAACCTTATCACTTAGAGGAAGGAGAAGTCGTAACAAGGTTTCC
1473	9fc177893f887b58f7031d27c503f36b	OTU_1473	115	227	4	GTCGCTCCTACCGATTTGAGTGATCCGGTGAACCTTTTGGACCGGGCCGTTCGCGGCTTGGAAAATCAAGTAAACCACGTCACTTAGAGGAAGGAGAAGTCGTAACAAGGTTTCC
1474	4e027f9264d004e7958fab68e81cee2b	OTU_1474	131	226	1	GTCGCACCTACCGATTGGATGGTCCGGTGAAGCCTCGGGATTGTGGTTCTTGCCGCTTTATTGTGGCGTGACCGCGAGAACTTGTCTAAACCTTATCATCAAGAGGAAGGTGAAGTCGTAACAAGGTTTCC
1475	174efef91504b5cd85c34780c6c0c463	OTU_1475	131	225	2	CGTCGCACCTACCGATTGAATGGTCCGGTGAAGCCTCGGGATTGTGATTAGTTACCTTTATTGGTGGCTTATTGCGAGAACTTGTCTAAACCTTATCATTTAGAGGAAGGTGAAGTCGTAACAAGGTTTCC
1476	cb2f5a455a38f2eee7a53e1e9e278eb5	OTU_1476	122	225	1	GTCGCTCCTACCGATTTTGAGTGATCCGGTGAACCTTTTGGACTGCAGTGTCTTTATGGCACTTGTGGGAAGTTAAGTAAACCTTATCACTTAGAGGAAGGAGAAGTCGTAACAAGGTTTCC
1477	01e81f9b15e35d94c578da02f79746a0	OTU_1477	128	225	2	GTCGCACCTACCGATTGAATGGTCCGGTGAAGCCTCGGGATTGTGACTGGTGCCTTTACTGGAGCTGGATGCGAGAACTTGTCTAAACCTTATCATTTAGAGGAAGGTGAAGTCGTAACAAGGTTTCC
1478	cb065c152552ec990a3724cef790ce8a	OTU_1478	106	224	5	GTCAAGCCACGAAAGCCGAGAGCGCCCGAAGTCGTTTGCCTAACCGTAAGGAGGGCGGCGCCGAAGGCGAGCTTGGTGATTGGGACTAAGTCGTAACAAGGTAGCC
1479	5d828509a91652657e3be3224fd55ae8	OTU_1479	131	224	2	CCGTCGCTCCTACCGATTGAATGAACCGGTGAATAATCCGGATTGCGAGTAGCGCCAGTTTCTGGTGCTAATCACGAGAAGTTTAGTGAACCTTTTCATTTAGAGGAAGGAGAAGTCGTAACAAGGTTTCC
1480	d23b1d71781672fe1934f04ee8b4ea7e	OTU_1480	131	224	3	CGTCGCACCTACCGATTGAATGATTCGGTGAAATTCTCGGACTGTGCACATTAATCCTTCGGGATTTTTGAGCGTAGGAAGTTAAGTAAACCTCATCATTTAGAGGAAGGTGAAGTCGTAACAAGGTTTCC
1481	1d30b037cf3757b27a2be765283a7ee6	OTU_1481	131	224	4	CGTCGCTCCTACCGATTGAGCAATCCGGTGAATATTTCGGACCGAGAGCTAGGTTGGTTCGCCAGCTTAGTTTTTGGAAAGTCAAGTGAACCTTATTGCTTAGAGGAAGGAGAAGTCGTAACAAGGTTTCC
1482	d4b923dfd394ac43b1abb175fed11c7d	OTU_1482	126	224	2	GTCGCTCCTACCGATTTCGAGTGATCCGGTGAACCTCTTGGACCGCTTAGGGGGCTTGACCCGCCTAGGTAGAAAATTAAGTAAACCATATCACTTAGAGGAAGGAGAAGTCGTAACAAGGTTTCC
1483	e88a4c29d1fb7d97088421c87f9769b3	OTU_1483	131	224	1	CGTCGCTTCTACCGATTGAGTTTCTCGGTGAATACTTTGGACATACCCTCTTAGCGGTTCGCCGCTTTTTGGGAATGAAAATTGAGTGAACCTCGAAACTTAGAGGAAGAAGAAGTCGTAACAAGGTTTCC
1484	a0d693e695b9b2d638ffd100e8d7682f	OTU_1484	131	224	3	GTCGCACCTACCGATTGAATGATCCGGTGAAGCCTCGGGATTTTGGTTTCTGTTGCTTCATTGCAATAATATCAGGAGAACTTGTCTAAACCTTATCATTTAGAGGAAGGTGAAGTCGTAACAAGGTTTCC
1485	36d6654dfc8cb02ec2af098873ddbcf5	OTU_1485	131	224	4	GTCGCTACTACCGATTGAACGTTTTAGTGAGGTATTTGGATTGGGCCTCGGCGGGTTTGCGCCCGCCTTGTGCTCGAGAAGACTCCCAAACTTGAGCGTTTAGAGGAAGTAAAAGTCGTAACAAGGTTTCC
1486	f37fcaba06118ce1a21a7d5363a4086b	OTU_1486	106	224	7	GTCACACCATGGGAGTGGGTTGCACCAGAAGTGGTTAGTCTAACCTTCGGGAGGACGATCACCACGGTGTGGTTCATGACTGGGGTGAAGTCGTAACAAGGTAGCC
1487	fb6a798d3b2b1c31303089c05f853ca6	OTU_1487	128	224	8	GTCGCTCCTACCGATTGAATGCTCAGGTGAGCCATTCGGACCTTCATCATGCCGGTTTCCGGTTTTGATGAGGGAAAGTCTTGCGAACCTTATCATTTAGAGGGAGGAGAAGTCGTAACAAGGTTTCC
1488	6103b25e44947fec9a29b180eb22222f	OTU_1488	131	224	6	CGTCGCACCTACCGATTGAATGGTCCGGTGAAGCCTCGGGATTGTGACTGGTTGGCTTTATTGTTGATCTGTCGCGAGAACTTGTCTAAACCTTATCATTTAGAGGAAGGTGAAGTCGTAACAAGGTTTCC
1489	e019d8b6a517962c52c66970f063fa5c	OTU_1489	132	223	2	GTCGCACCTACCGATTGAATGATTCGGTGAAAATTTCGGACCGTGCCTCTGTACCCTTCATTGGGAACGGGGATATGGGAAGTTATTTAAACCTCATCATTTAGAGGAAGGTGAAGTCGTAACAAGGTTTCC
1490	89aebbbb5ff70668546c7e4c2cf2781b	OTU_1490	110	223	3	GTCACGCCACGGGAGTTGATTCTACCCGAAGCCGGTAGCCTAACCTGTTTACAGGAGGGAGCCGACCACGGTAGGGTTAGCGACTGGGGTGAAGTCGTAACAAGGTAGCC
1491	27533016101cd23d0aad9de1dddd4bd5	OTU_1491	131	222	2	CGTCGCTCTTACCGATGGACTTCTCTGTGAGTTTGAGGGACTGGCTTTTTTATTATTTTATAATATTAGAGCTATGGAAACTCAAACGAACAGTGTGGTCTAAAGGAAAGAGAAGTCGTAACAAGGCATCG
1492	9e8ce6243f070e5508fe8585b18ee7d2	OTU_1492	136	221	2	GTCGCTACTACCGATCGTTCCCGTTAATGAGCGCCTCGGATTGGTCCCGTGAGCGGGTTTCGGCCTGCTCTTGGCGTGCCGAGAAGATGTGCAAATTATCAGGAATAGAGGAAGTAAAAGTCGTAACAAGGTATCC
1493	b96b70f3bd80cf5f6e60d9f755eb7015	OTU_1493	132	221	1	GTCGCTCCTACCGATTGAGTGGTCCGGTGAGGCCTTGGGAGGGCTAAGTAAACTGTGTTTTCAAGGATTACCTGGCCCGAACCTGGTCAAACCTTATCACTTAGAGGAAGGAGAAGTCGTAACAAGGTTTCC
1494	369f70dab928ca37381a71be62b836f6	OTU_1494	136	220	10	GTCGCTACTACCGATTGGATGGTTTAGTGAGGTCCTCGGATCGGCCCCGCCGGGGTCGGTCACGGTCCTGGCGGAGCGCCGAGAAGACGATCAAACTTGACTATCTAGGGGAAGTAAAAGTCGTAACAAGGTTTCC
1495	ce657b37ef888d12eacfd6991bcd0e47	OTU_1495	131	220	1	CCGTCGCTCCTACCGATTGAATGTTCCGGTGAATAATTCGGACTGCGGCTATGGGGCCTGTGCCACCGTAGCTGTGGGAAGTTTAGTGAACCTTAACATTTAGAGGAAGGAGAAGTCGTAACAAGGTTTCC
1496	bb1867a32a24173c3d83ed49bfc17dd9	OTU_1496	128	220	2	GTCGCACCTACCGATTGAATGGTCCGGTGAAGCCTCGGGATTGTGACTGGTTTGCTTTTGCGAGTCGGTTGCGAGAACTTGTCTAAACCTTATCATTTAGAGGAAGGTGAAGTCGTAACAAGGTTTCC
1497	62ca7ceab8121fcbc31841bcf59317a0	OTU_1497	131	220	4	CGTCGCTCCTACCGATTGAATGTGCTGGTGAAAAGTTCGGATTAGGAGTGGGGGATAGCAATATTTCCCGCTTCCGAGAAAATCTTTAAACCCTCCCATTTAGAGGAAGGAGAAGTCGTAACAAGGTTTCC
1498	51efb612b045f33a3beed1ceca359427	OTU_1498	132	220	6	GTCGCTACTACCGATTGAATGGTTTAGTGAGGTATCGGGACTGGCACTTATTTGTTGGAAACGACGAATTTGAGCTGGGAACTTTCCCAAACTTGATCATTTAGAGGAAGTAAAAGTCGTAACAAGGTTTCC
1499	fbd09e48ac16b4b56ad499292c370ae4	OTU_1499	131	220	4	GTCGCTCCTACCGATTGAGTGGTCCGGTGAATAATTCGGACCGGCGCATGTGTCGGTTTTACTGACGCAAGCACTGGAAAGTCTAGTAAACCTTATCACTTAGAGGAAGGAGAAGTCGTAACAAGGTTTCC
1500	786163ec7d5f95f460e92bb9a0fdb00b	OTU_1500	103	220	9	GTCGTTTCTTCCGACTGGTACTCATTGTGAATTGCGAGGAGATTGCTTCAAATCGTTGTAAATGCTGGGTATTGGAGGAAGAAAAAGTCGTAACAAGGTTATC
1501	b342b65524c853057781973d45df2b9c	OTU_1501	133	220	5	GTCGTTGCTACCGATTTGGTTCACGCATAGAGAACTCAGGAGACTCCGGTTTCGGGCTTCGGTCTGTTTACCTGGAGTCGAATTTGTTCAATATGTGTATACTAGAGGAAGCAAAAGTCGTAACAAGGTTACT
1502	1a54e3453da49241cf8f5ff46ac8e05f	OTU_1502	167	220	1	GTCGCTACTACCGATTGAATGATTTAGTGAGGCCTTCGGACTGGCGCTCTTGGATGTTCGGCGTCCCCTTCATCCTTCTAGGGTTGGGGGTTCGCCAAGCCTCGAGCTGACGGAAAGATGTCCAAACTTGATCATTTAGAGGAAGTAAAAGTCGTAACAAGGTTTCC
1503	ceede3c878731c2a2cc84db13b7763d5	OTU_1503	104	219	1	GTCGTTTCTTCCGACTGATACTCATTGTGAATTACGAGGATGGGTTTCCAAAATCGTTGTAAATGCTGGGTATTGGAGGAGGAAAAAGTCGTAACAAGGTTATC
1504	939d4231d589637b863a7f839e8fff87	OTU_1504	113	219	2	GTCAAGCCACCCAAGCAGGATGCACCCGAAAACATTATATCTAACCAGGGCAACTTGGAGGAAAATGTTGAAGGAGTGTTTTGTGAGGAGGACTAAGTCGTAACAAGGTAGTC
1505	b35f80e8f66ab2542e022ab35e9ff227	OTU_1505	114	219	1	GTCGCTCCTACCGATTTCGAGTGTTCAGGTGAACCTTCTGGACTGAGTCGCAAGACCCGGGAAGTTAGGTAAATCTTAACACTTAGAGGAAGGAGAAGTCGTAACAAGGTTTCC
1506	4bbd74201eecb89e4ad1ea357da01d39	OTU_1506	136	219	2	GTCGCTAGTACCGATTGGACCATGTAATGAGATCCTTGGATTGGAGCCGTCGTGGCCGGCAACGGTCGTGGCGGATTCCGAGAAATCGAGCTAATTTCATGGTCTAGAGGAACTAAAAGTCGTAACAAGGTTTCCG
1507	b92432be5c8f158994bf377ff6efa6a6	OTU_1507	136	219	5	GTCGCTACTACCGATTGAATGGTTTAGTGAGATCTTCAGATTGGCGCCACTGTGGCTCAGCAATGGGCTCGGTGGATGCCGAAAAGTTGATCAAACTTGATCATTTAGAGGAAGTAAAAGTCGTAACAAGGTTTCC
1508	298dd8beb6c90806cce373401ec777c2	OTU_1508	131	219	1	CGTCGCTACTACCGATTGAATGGCTTAGTGAGGCCCTCGGATTGAGCCAAGGCTCCTTCACGGGAGCTCTGGATTGAGAAGTTGGTCAAACTTGGTCATTTAGAGGAAGTAAAAGTCGTAACAAGGTTTCC
1509	65df0063dd93faba38822607356ca0b8	OTU_1509	131	218	2	GTCGCTACTACCGATCGAACGTTCTAGCGAGGTCGTCGGATCGATCGACCGCCGGCCTTCGGGTCGGCGCCGGCCGAGAAAGCGATCGAACTCGAGCGTTTAGAGGAAGTAAAAGTCGTAACAAGGTTTCC
1510	8fa42dfc5b82d3da0aed08330d76c41b	OTU_1510	136	218	9	GTCGCTACTACCGATTGAATGGTTTAGTGAGGTCCTCCGATTGAGCCTGGTAGGTGCGGCAACGCAGCAGCCGAGGTTCGAAAAGACGATCGAACTTGATCATTTAGAGGAAGTAAAAGTCGTAACAAGGTTTCCG
1511	096a1d49202b4f615af5a9b94383e45c	OTU_1511	117	218	7	GTCGCACCTACCGATGCTGCTCATCTTGAATTCGTGGGATTGGTCTTGTTTCGGCGAGATTGAGAACGCGCGTGAAAGCCGTGCAGTAGAGGAAGGTGAAGTCGTAACAAGGTTTCC
1512	a1b53bcd738ccb4880bbb76f5c0c5c63	OTU_1512	131	218	2	CGTCGCTACTACCGATTGAACGTTTTAGTGAGGCATTTGGATCGGACGTCGTGAGGTTCGCGCCTCTCGGCTGCTGAGAAGACTTCCGAACTTGAGCGTTTAGAGGAAGTAAAAGTCGTAACAAGGTTTCC
1513	eaad14f2789d5dc5178191915c1aa96d	OTU_1513	132	218	1	GTCGCTACTACCGATTGAACGTTTTAGTGAGGCATTTGGACTGGACCTGGCCGAGTTCACGCTTGGCTTGTTGTCCGGAAAGACTTCCAAACTTGAGCGTTTAGAGGAAGTAAAAGTCGTAACAAGGTTTCC
1514	82d3228dd88c3d28e14e967fda635744	OTU_1514	128	218	2	GTCGCTCCTACCGATTGGATGATTTGGTAAGCTTTTGGGATTGATTTGGCTACGCCATTGGCTACGCCAGGTTTGAACTTAATCAAACCCAATCATCTAGAGGAAGGAGAAGTCGTAACAAGGTTTCC
1515	44994178bf0b22534e49efb7997dcaa4	OTU_1515	132	217	2	GTCGCTACTACCGATTGAATGGCTTGGTGAGATCTCCGGATTGGCGTTGGGGAGCCGGCAACGGCACCCCTTGGCCGAGAAGCTGATCAAACCTGGTCATTTAGAGGAAGTAAAAGTCGTAACAAGGTTTCC
1516	a587823f8048273f485b2c50c48e47fc	OTU_1516	127	217	1	GTCGCTCCTACCGATTGAATGATCCGGTGAATACTTCGGACTGCGAAATTTTTAGTTTCTATTTTTTTCACGGAAAGTCGAATAAACCTTATCATTTAGAGGAAGGAGAAGTCGTAACAAGGTTTCC
1517	89d5e60cb20d037e96dab243ba006262	OTU_1517	136	217	7	GTCGCTCCTACCGATTGAATGTTCCGGTGAACTCTTCGGAGTCGTGGTCTTGATTGGGGCAACTCATTCTTGACCAATTGACAAAGTTGCGTAAACCTTAACATTTAGAGGAAGGAGAAGTCGTAACAAGGTTTCC
1518	991e26e77465cd1ec30bb9c4770a310f	OTU_1518	106	217	4	GTCACATCATGGGAGTGGGTTGCACCAGAAGTAGCTAGTTTAACCTTCGGGAGAACGGTTACCACGGTGTGATTCATGACTGGGATGAAGTCGTAACAAGGTAGCC
1519	b5414d6dc93cea8d8aa899d0d9aa7f93	OTU_1519	131	217	1	CCGTCGCTCCTACCGATTGAGTGATCCGGTGAATAATTTGGACTGCAGCAATGCTTGGATCCCGAAAGTTGCAGCGGAAAGTTTAGTGAACCTTATCACTTAGAGGAAGGAGAAGTCGTAACAAGGTTTCC
1520	9fae18d06775b7c4b1d71c5eacfe5043	OTU_1520	108	216	5	GTCACATCATGAAAGCCGTCTGCACCCGAAGTCGCTGAGCTAACCCGCAAGGGAGGCAGGTGCCGAAGGTGTGGGTGGTAATTGGGATGAAGTCGTAACAAGGTAGCC
1521	d90a2245ad85d98f7e65cedb26c08036	OTU_1521	104	216	1	GTCGTTTCTTCCGACTGATACTCATTGTGAATTGCGGGGAAGTGTATCTGTAACCGCTGTGAATGCTGGGTATTGGAGGAAGAAAAAGTCGTAACAAGGTTATC
1522	93c5b0cd91f5a9260e4f635870c77a71	OTU_1522	104	216	4	GTCGTTTCTTCCGACTGGTACTCATTGTGAATTGCGAGGATGTTTTATCAAAATCGTTGTAAATGCTGGGTATTGGAGGAAGAAAAAGTCGTAACAAGGTTATC
1523	445ed0e7adce1f1688248a8e700d4374	OTU_1523	131	216	4	GTCGCATCTACCGATTGAATGGAGAGGCAAAATCTTCGGACCGTGACGCGTTGGGGTTAAAGCCAATGCAGTCGTGGGAAGTGGATTAAACCTTTCTATTTAGAGGAAGGTAAAGTCGTAACAAGGTTTCC
1524	a639bc9228bbd0ebc1ac9b8bcf6b330f	OTU_1524	131	216	1	GTCGCTACTACCGATTGAACGTTTTAGTGAGGTATTTGGATTGGACCTGGCTGGGTTCACGCCCTCCCTGTGTCCGAAAAGACTCCCAAACTTGAGCGTTTAGAGGAAGTAAAAGTCGTAACAAGGTTTCC
1525	afaa3705b5a4d86604b2721e5856cbdc	OTU_1525	132	215	3	GTCGCTACTACCGATTGAATGGCTCAGTGAGGCCTTGGGATTGGCTTAGGAGGGTTGGCAACGACCCCCCAGAGCCGAAAACTTGGTCAAACTCGGTCATTTAGAGGAAGTAAAAGTCGTAACAAGGTTTCC
1526	a5c657f6e46b3d3bd1289a3b9326114e	OTU_1526	131	215	7	CCGTCGCTCCTACCGATTGAGTGATCCGGTGAATAATTTGGACTGCAGCAATGTTTGGTTCCTGAGCGTTGCCGTGGAAAGTTTAGTGAACCTTATCACTTAGAGGAAGGAGAAGTCGTAACAAGGTTTCC
1527	dd55d3f7528ef13bb0cb41cd5cd531be	OTU_1527	141	215	2	GTCGCTACTACCGATTGAACGATTTAGTGAGAAAATCAGACCGATCCTTTGCGGTGGGCTCTCGGGTCCGCCTGCTCTTGTGAGAGGGAAGACGTTCAAACTTGATCGTTTAGAGGAAGTAAAAGTCGTAACAAGGTTTTC
1528	21d6edae3ed4794ebdc3e8b67da82fd6	OTU_1528	120	215	1	GTCGCTCCTACCGATTGAGTGATCCGGTGAATAATTCGGACTGCATGACGGGCAACCGTTATGCGGGAAGTTTAGTGAACCTTATCACTTAGAGGAAGGAGAAGTCGTAACAAGGTTTCC
1529	e1b915db3744e8ad5acbf0ee043b5028	OTU_1529	150	214	1	GTCGCTACTACCGATTGAATGATTTAGTGAGGACTTCGGACTGGTCGGTGAGGCAGCCTGCTCTCGCTTGCGGGGGTAGTCGCCACGCCAGACTGGAAAGATGCCCAAACTTGATCATTTAGAGGAAGTAAAAGTCGTAACAAGGTTTCC
1530	70eeb30e064bd8cfa228a7561a062fbe	OTU_1530	250	214	8	GTCGCACCTACCGATTGAATGACTCGGTGAAATCTACGGACTACAGCCTACCAGCCCTCGGGCAGGAGGTCGTGGGAAGTAAATTAAACCTCGCCATTTAGAGGAAGGTGAAGTCGTAACAAGGTTTCCGTAGGTAAGAATGAAACTCCCATCTATCTATCGATTTTATTACACGAAAATAGTCTCCCATCAGAAAACGTATCCTAACTCAAATCTTTCCTATTTAATCTTAAATTCATTATCTTCATTC
1531	818bdae4dc392dfb8b566d05c4d84401	OTU_1531	108	214	1	GTCACATCACGAAAGCTGGCTGTACTAGAAGTAGCTTCGCCAACCCGCAAGGGAGGCTGGTTCCTAAGGTATGGTCAGTGATTGGGGTGAAGTCGTAACAAGGTAGCT
1532	b3595f40be3123076d085e783ea870cc	OTU_1532	107	213	2	GTCACACCATGGGAGTTGGTTTCACCCGAAGATAGTGCGCTAACCTTTTAGGAGGCAGCTAGCCACGGTGGGATCAGCGACTGGGGTGAAGTCGTAACAAGGTAGCC
1533	d4deeb72b5775157a8a78a1188b5b8d3	OTU_1533	127	213	1	GTCGCTCCTACCGATTGAGTGATCCGGTGAATAATTTGGACTGCGAGGAATTGGTTTTGCCAGTTCTTTGTAGGAAGTTTAGTGAACCTTATCACTTAGAGGAAGGAGAAGTCGTAACAAGGTTTCC
1534	4e429fc7d4d3ff05de1f40a91051e6b8	OTU_1534	136	213	2	GTCGCTCCTACCGATTGAAGTTTTCGGTGAATTTGTAGGAGGTATTCTTTGAAACTGGTTCGCCAGTGGATTTGTTTACCAAATGCAAATGAATCGTGAGCTTTAGAGGAAGGAGAAGTCGTAACAAGGTTTCCGT
1535	6e01baff38dc8d3ba5af75bc73e81f15	OTU_1535	132	213	2	GTCGCACCAAACGATTGAGTGTTTTGGTGAAAACACAGGAATCTACTGCCTTTGGCTTGATTGCTAGGGGTTGAAGATGAATGTGTTTAAACCAGAATACTTAGAGTATGGTGAAGTCGTAACAAGGTTTCC
1536	0435cd46c0906b71229e88153dc0849f	OTU_1536	131	213	8	CGTCGCTACTACCGATTGAACGTTTTAGTGAGGTATTTGGATCGGCGCTCCGGAGGTTCGCGCCTCCGTTGCGCTGAGAAGACTCCCAAACTTGAGCGTTTAGAGGAAGTAAAAGTCGTAACAAGGTTTCC
1537	44d9362ddc6cb1a6b31a1784a350f078	OTU_1537	125	213	7	GTCGTTGCCTGTAATGGGTTGTGAGTAGAGCCTTTTGGAGGTTCCGTGTTGGGGCAACCCTTCGTGGGACCAAAATTGGGCAATACTCGCAATCTAGAAGAGGAAAAAGTCGTAACAAGGTTGCT
1538	6ab6143be8e70f75eef87a04f8f0e3c9	OTU_1538	133	212	7	GTCGCTCCTACCGATTGAATGATCCGGTGAGCTTTTTGGACTGAGGCATCGGTAGTGGTTCGCCACTCTGACGTCTTGGGAAGATGCGCAAACCTTATCATTTAGAGGAAGGAGAAGTCGTAACAAGGTTTCC
1539	ac4cc5d22d76a45be5d565b30d80a674	OTU_1539	132	212	9	GTCGCTCCTACCGATTGAATGGTCCGGTGAGGTTCTCGGATTCTACGAGTTGGCTGGTTCGCTAGCCGATTCGCGGGAGAAGTTACCCAAACCTTACCATTTAGAGGAAGGAGAAGTCGTAACAAGGTTTCC
1540	6b57f8c0c1c145103d85d62646a6916e	OTU_1540	108	212	4	GTCACATCACGAAAGTTTGCTGCTCTCGAAGTCGCTGGGCTAACCCGCAAGGGAGGCAGGTGCCGACGGAGTGGTAGGCGATTGGGGTGAAGTCGTAACAAGGTAGCT
1541	b551a3062917c1291f59cb2a20b45f43	OTU_1541	136	212	1	GTCGCTACTACCGATTGGATGGTTTAGTGAGCTCCTCGGACTGGTCCCGATGGTGTGGCAACACGCTATCGTGGCGCCGGGAAGAAGGGCAAACTGTACTATCTAGAGGAAGTAAAAGTCGTAACAAGGTTTCCGT
1542	77193243196e68a5fbfc70958f35660d	OTU_1542	131	212	4	CCGTCGCTCCTACCGATTGAGTGATCCGGTGAATAATCCAGACTGCCGCAGAATCCAGTTCTTGGAAACTGTATCGGAAAGTTTCGTGAACCTTATCACTTAGAGGAAGGAGAAGTCGTAACAAGGTTTCC
1543	43a1abc2d4ea121ed38363cbcc6bd2d6	OTU_1543	131	211	6	CGTCGCACCTACCGATTGAGAGCATAGGTGAAAACTCAGGATCGTTGATTTCGCACCTCTGGTAGCGTTATCGGTGAGAATTTGTTTAAACCTCCGTTCTTAGAGGAAGGTGAAGTCGTAACAAGGTTTCC
1544	645443cfce9e86e46d049c4030c29894	OTU_1544	137	211	2	GTCGCTACTACCGATTGGATGGTTTAGCGAGAGCCTTGGATTGGAGCCCGGGTGGTCAGCGATGGCCGCCCGGGAGTCCCTGAGAAATTGCTCCAGCTTGATCATCTAGAGGAAGTAAAAGTCGTAACAAGGTTTCC
1545	42ad94632f7fb89d106fb4a088da393f	OTU_1545	131	211	1	CGTCGCTACTACTGATTGGACGTTTAAGCAAGATTTTTGAACACTGGCAGTTGATACTTCGGTAGACACAGTGGGAAGAAGAAGATCGAGCTTAGTTGTCTAGAGGAAGTAAAAGTCGTAACAAGGTTTCC
1546	140a83a8515afaee34df9a57165c1b0b	OTU_1546	125	211	3	GTCGCTATTTCCGATTTCGAGTGGTCCGGTGAATCTTTCGGACCGCGGAAGTTCTCTAAGTTCTTTCGCGGAAAGTCAGGTAAACCTAATCACTTAGAGGAAGTAAAAGTCGTAACAAGGTTTCC
1547	4b229456dc8025c8986f924fafd19465	OTU_1547	136	211	2	GTCGCTCCTACCGATTGAATGATTCGATGAAATTTTCGGAGAATGGCTTTGAGTCTGGTTTTCCGGACTAAAAGTTGTTCGAAGTTACTTAAATCTGATCATTTAGAGGAAGGAGAAGTCGTAACAAGGTTTCCGT
1548	9955f0af444b8b620fc2279d7ccf9c08	OTU_1548	131	211	3	CGTCGTTGCTACCGATGATGTGGAGATAGAGACGTTGGGAGAGGCCGAATAACAGCCCTCGGGCTTTACTCAGCTTCGAACTTCTCCGATATCTCCATATTAGAGGAAGCAAAAGTCGTAACAAGGTAGCT
1549	33423a95e241c37c6fd1b114ce1fe204	OTU_1549	131	211	5	CGCCGTTGCTACCGATGATGTGAAGATAGAGACGTTGGGAGAGGCCGACTAACAGCCCTCGGGCTTTAGCCAGCTTCGAACTTCTCCGATATCTCCATATTAGAGGAAGCAAAAGTCGTAACAAGGTAGCT
1550	0e893327ab971f7e51f34bcc778ca13a	OTU_1550	104	211	7	GTCGCTCTTACCGATGGATTTCTCTGTGAGTTTGAGGGACTCGTAATAGGAAACTTAAACGAACAGTGTGATCTAAAGGAAAGAGAAGTCGTAACAAGGCATCG
1551	d4ed3d4427a84294f4ee7bae52686a35	OTU_1551	137	211	8	GTCGCTACTACCGATTGAATGGTTTAGTGAGACCCTCGGATTCGTCCCAGCATGATGGGTATCTGTCAAGCTGGTGTAGCGGAGAAGACGGTCGAACTTGATCATTTAGAGGAAGTAAAAGTCGTAACAAGGTTTCC
1552	f3e7a81c3518830784e8de6186f1b427	OTU_1552	113	211	8	GTCAAGCCACCCAAGCAGGATGCACCCGAAAACATTATATCTAACCAGGGTAACTTGGAGGAAGATGTTGAAGGAGTGTTTTGTGAGGAGGACTAAGTCGTAACAAGGTAGTC
1553	663450051edd4568eb07e94f2fd0d96a	OTU_1553	136	211	6	GTCGCTACTACCGATTGGATGGTTTAGTGAGACCCACGGATCGGACCCGTGTCGGCCAGCAATGGTTGACGCGGCGCGCTGAGAAGTCGGTCGAACTGTATCATCTAGAGGAAGTAAAAGTCGTAACAAGGTTTCC
1554	5164568e72928e1aa0262b90e837f84e	OTU_1554	136	210	7	GTCGCACCTACCGATTGAATGGTCCGGTGAATTCTTCGGACTGCGGCTTTGACTCGCTTTCGGGCGAGACGTTGCTGCGGGAAGTTGATTAAACCTTACCATTTAGAGGAAGGTGAAGTCGTAACAAGGTTTCCGT
1555	22b191ea6ffb0c516b98d8c25d9f0c97	OTU_1555	106	210	2	GTCAAGCCACGAAAGTGGGGGGTCGACGAAGTCGCCGAGCTAACCTTCGGGAGGCAGGTGCCGAATCGAAACTCCGCGATTGGGACTAAGTCGTAACAAGGTAGCC
1556	f8473d8a7a91317e0ebb388bad6d6bfe	OTU_1556	144	210	8	GTCACACTCCGAAAGCGGACTGTACTCTAAAAAACTCCTTTGCTAAACTGCCAGAACACTTTCTTTAGACAGTGTGCACCTTAAGCTTAGCAAAAATTTTGAAAGTATTTTCTGTAATTGTAGTGAAGTCGTAACAAGGTAGCT
1557	f495e3b50ba4c1fe5ceac71356c50856	OTU_1557	136	210	6	GTCGCTACTACCGATTGGATGGTTTAGTGAGATCCTCGGATTGGTCCCGGCATGGTGGGAAACCACCGCGCCGGTGTGCCGAGAATTCGATCAAACTTGATCATCTAGAGGAAGTAAAAGTCGTAACAAGGTTTCC
1558	d195ff1e7dcde67b72d1f5069070cea0	OTU_1558	133	209	3	GTCGCTACTACCGATTGAGCATTAGGGTGAAATCTTCGGACCGTGGCATACTTCTGGCCTAGCCAGTCTTTGTCCGTGGGAGGTCGCTTAAATCCTGATGCTTAGAGGAAGTAAAAGTCGTAACAAGGTTTCC
1559	55bb5bc8b41bf6c0a8cf9b1dac1e8dfa	OTU_1559	137	209	2	GTCGCTACTACCGATTGAATGATTTAGTGAGGTCTTCGGACCGACCGGCGCAGTTGTCTTCCGGGCAACCGTGCTGTGTCTGGAAAGATGCCCAAACTTGATCATTTAGAGGAAGTAAAAGTCGTAACAAGGTTTCC
1560	74832ca6149d286b9ccba65d60b40d4b	OTU_1560	122	209	5	GTCGCTCCTACCGATTGAGTGATCCGGTGAATAATTCGGACCGCGGCTTATCGGCTGATATGCTGCGGGAAGTTTAGTGAACCTTATCACTTAGAGGAAGGAGAAGTCGTAACAAGGTTTCC
1561	2eaba8e4d376b735beaa45a535d29773	OTU_1561	107	208	1	GTCACATCACGAAAGTAGGTTGTACTAGAAGTAGCTGGGCTAACCCTTTGGGAGGTAAGTTACTACGGTATGATTTATGATTGGGGTGAAGTCGTAACAAGGTAGCT
1562	c7bde53081d1ded5c0a8f67867cb6c3e	OTU_1562	131	208	1	CGTCGCTCCTACCGATTGAGTGGTCCGGTGAATAATTCGGACTGGTGCCGATTTCGGTTCTCCGAGTTCGGCGCTGGGAAGTCTAGTGAACCTTATCACTTAGAGGAAGGAGAAGTCGTAACAAGGTTTCC
1563	4fca5fa45750081eac9321d66218b0e2	OTU_1563	131	208	2	CGTCGCACCTACCGATTGAATGGTCCGGTGAAGACTCGGGATTGTGGTCTGGTTCCTTCATTGGGACTTGACTGCGAGAACTTGTCTGAACCTTATCATTTAGAGGAAGGTGAAGTCGTAACAAGGTTTCC
1564	71cf4c34f13d2a7e78a912e99d02ed82	OTU_1564	131	208	3	GTCGCTCCTACCGATTGAGTCATCCGGTGAGCAGTTTGGATTGCGATTAGTTCGTGGCTTGCCACTTCTAGTTGCGAGAAGCTCTGCGAACCTTGTGACTTTGGGGAAGGAGAAGTCGTAACAAGGTTTTC
1565	4fa7e3c1341a8fe589b18f6305293003	OTU_1565	132	208	2	GTCGCTACTACCGATTGAATGGCTCAGTGAGGCCTTGGGATTGGCCAGGGGAGGTGGGCGACCACCACCCCAGGCCGAAAACTTGGTCAAACTTGGTCATTTAGAGGAAGTAAAAGTCGTAACAAGGTTTCC
1566	c5e9c639b8b74ebcf43cf0eb575ffa13	OTU_1566	101	208	4	GTCGTTTCTTCCGACTGATACTCAATGTGAATTATGGCGAGCATTGCAAACTGTCGTGAATGTTGAGTATTGGAGGAAGAAAAAGTCGTAACAAGGTTGCT
1567	9ac35e77d71928383d5be7dece96bf7d	OTU_1567	131	208	5	CGTCGCACCTACCGATTGAATGGTCCGGTGAAGCCTCGAGATTGTGGTTAGTTTCCTTTATTGGATGTTAGCCGCGAGAACTTATCTAAACCTTATCATTTAGAGGAAGGTGAAGTCGTAACAAGGTTTCC
1568	4df42d563ee0ad3b1e89bfeade0b6b1e	OTU_1568	106	207	2	GTCACACCATGGGAGTTGACATTGGCAGAATACGTTGAGCCAACCTTTTGGAGGCAGGCGTAGAAGCTAGTGTCGATGACTGGGGTGAAGTCGTAACAAGGTAGCA
1569	1be9d679cff958acbd28b22f2c975ee2	OTU_1569	153	207	2	GTCACATCACGGAAGTTAAATTCATTTGAAATAACCCAATTAACCTTTTTATTCATTATTACACGATAATGACATTTATCTTTTAATGAAGACATTGGAGATTGATTACAAGGGTGGATTTTTTGACTATGATGAAGTCGTAACAAGGTAGCC
1570	ce64fe733af92904d21e5c188ac4fbeb	OTU_1570	108	207	3	GTCACACCCTGGGAATCGAAAGTATCTGAAGCTGACGTTCTTAACCTTCTGGGAGAGACGCTGTCACGGTAAAGTCCTTGACTGGGGTGAAGTCGTAACAAGGTAGTG
1571	dcb447a286f88dca9437107ef2d45f10	OTU_1571	108	207	2	GTCAAAGCATGAAAGTTGTCAGCACCCGAAATCGTTTTAGCTAACCGTCAAGGAGGCGAGCGATGAAGGTGAGGGCGATGATTGGGCTTAAGTCGTAACAAGGTAGCA
1572	d08a5b862d1b9e492a91577fc3a51b71	OTU_1572	100	207	1	GTCACACCATGGGAGTTGAACTCATTCGAAGCGGGGATGCTAAGATAGCTACCCTCCACAGTGGATTCAGCGACTGGGGTGAAGTCGTAACAAGGTAACC
1573	e03ebf45742a2d0e38c5da44ee4f6bb4	OTU_1573	132	207	1	GTCGCTACTACCGATTGAACGGCTTAGTGAGTTCTAGGGACCGAAGGGATTGCAGGGTTTCCTGCTTTCTCCTTTGAGGAACTAGTGCAAACTTGATCGTTTAGAGGAAGTAAAAGTCGTAACAAGGTTTCC
1574	3d9180776db0d44d4701b79c42fb4e61	OTU_1574	131	207	1	CGTCGCACCTACCGATTGAATGATCCGGTGAAGCCTCGGGATTGTGGTCAGTTTGCTTCATTGCGAGTTGATTGCGAGAACTTGTCTAAACCTTATCATTTAGAGGAAGGTGAAGTCGTAACAAGGTTTCC
1575	21ffa21e403ea4abe30d90ea467704e7	OTU_1575	106	207	2	GTCACACCCTGGAAATTGTTTCTAATTGAAGCTTGTTACCTAACCGTAGGGAGGGAATCTGTGAGATTGGAGAGAGTGACTGGGGTGAAGTCGTAACAAGGTAGCT
1576	4d6c01c351646f0dd0c61f5fbfd93358	OTU_1576	131	207	8	CGTCGCTCCTACCGATTGAGTGATCCGGTGAGTAATTCGGACCTGCGAGCCTTGCGGTTCGCTGCTTGGTTTGTGGGAAAGTCTAGTGAACCTTATCACTTAGAGGAAGGAGAAGTCGTAACAAGGTTTCT
1577	99f8128dc473f13b5922fce79f6b1fbe	OTU_1577	131	207	4	CGTCGCACCTACCGATTGAATGGTCCGGTGAAGCCTCGGGATTGTGATGGGTTCCCTTTATTGGGAGTTTGTCGCGAGAACTTGTCTAAACCTTATCATTTAGAGGAAGGTGAAGCCGTAACAAGGTTTCC
1578	bc0b4f7831f9f1ca091f2abd5db7c98d	OTU_1578	131	207	7	CCGTCGCTCCTACCGATTGAGCAATCCGGTGAATATTTCGGACGGAGATTTCTCGGGGCAACTCGTTGAAATTTCTGAAAGTCAAGTTAACCTTATTGCTTAGAGGAAGGAGAAGTCGTAACAAGGTTTCC
1579	6cc2ee646f02b72f3adde1ebf93499ce	OTU_1579	103	207	8	GTCGTTTCTTTCGACTGATACTCATTGTGAATTACGGGGAGATTTTGTCAAACCGTTGTGAATGCTGGGTATTGGAGAAAGAAAAAGTCGTAACAAGGTTATC
1580	bcc7b43c7ea1ac55bcbddbe33f603de6	OTU_1580	133	207	3	GTCGCTACTACCGATTGGATGGTTTAGTGAGATCCTCGGATTGGTCCCGGCGCGGCCTCTGGTCGCGCCGGAGTGCTGAAAAGAATGTCGAACTTGATCATCTAGAGGAAGTAAAAGTCGTAACAAGGTTTCC
1581	8333ef2b3186dc93c3deef092f7eecc7	OTU_1581	136	206	1	GTCGCTACTACCGATTGAATGGTTAGTGAGAATTTTGGACTGGAGCTTTCTTGTTCGGCAATGAACGAGAGAGAGTCCGGGAAGTCATTCTAACTGTATCATTTAGAGGAAGTAAAAGTCGTAACAAGGTTTCCGT
1582	67edf4c27ee6c5010536a150b4137607	OTU_1582	127	206	6	GTCGCTCCTACCGATTGGATGTTTCGGTAAGCTCTTGGGATTGCTGAACTGATGGTTTCCAGACGTTTAGTGAAAACTTGATCAAACCTAAACATCTAGAGGAAGGAGAAGTCGTAACAAGGTTTCC
1583	f095598ba6bc7b5463bbfb3a41da87ca	OTU_1583	106	206	3	GTCACATCACGAAAGCCAGGTGTACTAGAAGTCGCTGGCCCAACCTTCGGGAGGGAGGCGCCGACGGTGTGCTTGGTGATTGGGGTGAAGTCGTAACAAGGTAGCT
1584	a7ce8bd259ec62e16e0431b8bbecb0cc	OTU_1584	131	206	3	CGTCGCTCCTACCGATTGGATGGTCCGGTGAATTGATCGGACTGATGAATGTTTTCGCGGGTGCGAAATTATCACAGAAAGTTCAATAAGCCTTATCATCTAGAGGAAGGAGAAGTCGTAACAAGGTTTCC
1585	03c0048e76c733ca5c265340daf100c5	OTU_1585	136	206	6	GTCGCTACTACCGATTGAATGGTTTAGTGAGATCTTCGGATTGGCGCCACTGTGGCTCAGCAATGGGCTCGGTGGATGCCGAAAAGTTGATCAAACTTGATCATTTAGAGGAAGTAAAAGTCGTAACAAGGTTTCC
1586	ca6ccc8767aad62bd011169a8e02f34f	OTU_1586	128	206	5	GTCGCTCCTACCGATTGAATGCTCAGGTGAGCCATTCGGACCTCCATCATGCCGGTTTCCGGTTTTGATGAGGGAAAGTCTTGCGAACCTTATCATTTAGAGGAAGGAGAAGTCGTAACAAGGTTTCC
1587	161adbce1227c7510ad340d25a34c2a0	OTU_1587	126	206	6	GTCGCTCCTACCGATTGAGTGATCCGGTGAATACTTGGGACCGCGTCGAATCCCATTTGGGTTTCGATGTGGAAACTTGAGTGAACCTTATCACTTAGAGGAAGGAGAAGTCGTAACAAGGTTTCC
1588	8084286691d6955c41fd8dad7fa8fe33	OTU_1588	116	206	5	GTCGTTGTTTCCGATGATGGTGCAATACAGGTGATCGGACTGGCGGCTGTTTCAGCTGCTGGAAAGTTCACCGATATTTCTTCAATAGAGGAAGCAAAAGTCGTAACAAGGTAGCT
1589	ac9cd0e787534bc0e6de65afedba887a	OTU_1589	135	205	4	GTCGCTACTACCGATTGAATGGTTTAGTGAGAATTTTGGACTGGAGCTTTCTTGTTCAGCAATGAACGAGAGAGAGTCCGGGAAGTCATTCTAACTGTGTCATTTAGAGGAAGTAAAAGTCGTAACAAGGTTTCT
1590	6f9fae6d05ba9d487c3de6342c9c26ca	OTU_1590	144	205	1	GTCACACTCCGAAAGCGGACTGTACTCTAAAAAACTCCTTTGCTAAATTGCCAGAACACTCTCTTTAGACAGTGGGCACCTTAAGCTTAGCAAAAATTTTGAAAGTATTTTCTGTAATTGTAGTGAAGTCGTAACAAGGTAGCT
1591	1cc5621f1b6ee7313b82118ee2a6291d	OTU_1591	132	205	1	GTCGCTACTACTGATTGGATGGTTAAACAAGAACTGCTGAAGCTCGCTGTTGAGGCTTCGTGCCTCTGGCAGTGCGTGGAAGCGGATCGAGTTTAATTGTCTAGAGGAAGTAAAAGTCGTAACAAGGTTTCC
1592	e6a6faaabf720ae3ad2d2423110664e2	OTU_1592	126	205	4	GTCGCTCCTACCGATTGAGTGATCCGGTGAATACTTGGGACCGCGTCAAGCTCAATTTTGGGCTCGATGTGGAAACTTGAGTGAACCTTATCACTTTGAGGAAGGAGAAGTCGTAACAAGGTTTCC
1593	a4d39399d51ed736395bab5510c8b9c2	OTU_1593	126	204	2	GTCGCACCTACCGATTGAATGGTCCGGTGAAATCTTCGGACTGGGCGATAGTCAGCAATGACCGTTGCCTGGAAAGTTGCTTAAACCTTACCATTTAGAGGAAGGTGAAGTCGTAACAAGGTTTCC
1594	880aa5c4645660d2a4021d930601ec14	OTU_1594	128	204	4	GTCGCACCTACCGATTGGATGGTCCGGTGAAGCCTCGGGATTGTGACTAGTGCCTTTACTGGTGTTGGTTGCGAGAACTTGTCTAAACCTTATCATCTAGAGGAAGGTGAAGTCGTAACAAGGTTTCC
1595	308bf7d947fffbbf1427ed37f53bc4b9	OTU_1595	131	204	4	CGTCGCTCCTACCGATTGAGTGATCCGGTGAATAATTCGGACCTGCGAGCCTTGCGGTTCGCTGCTTGGTTTGTGGGAAAGTCTAGTGAACCTTATCACTTAGAGGAAGGAGAAGTCGTAACAAGGTTTCC
1596	d6c167c8a58dd66d23b880ad143aec07	OTU_1596	136	204	3	GTCGCTACTACCGATTGAATGGTTTAGTGAGATCCTTGGATCGGCCCCGTCGCGGCTGGCAACGGCCGCGTCGGCGCGTCGAGAAGACGATCAAACTTGATCATTTAGAGGAAGTAAAAGTCGTAACAAGGTTTCC
1597	bf037355f122eca4d796c05d711590eb	OTU_1597	131	204	10	CGTCGCACCTACCGATTGAATGGTCCGGTGAAGCCTCGGGATTGTGGCAAGTTTCCTTTATTGGAAGTTTGTTGCGAGAACTTGTCTAAACCTTATCATTTAGAGGAAGGTGAAGTCGTAACAAGGTTTCC
1598	bfd9a7eecb9ce113e3e17e12d509ade9	OTU_1598	131	203	1	CCGTCGCACCTACCGATTGAGTGGTCCGGTGAAGTCTCGGGATTGTGGCAATCTCCTTTATTGGAGTTTGACTGCGAGAACTTGCCTAAACCTTATCACTTAGAGGAAGGTGAAGTCGTAACAAGGTTCCC
1599	a0a95037bec04a80b60290e70aa343e6	OTU_1599	128	203	4	GTCGCTCCTACCGATTGGATGGTCCGGTGAGCTATTTGGACCGCTGACTTTTCAGTTCTCTGAGTTGACAGTGGAAAATCTCGCAAACCTTATCATCTAGAGGAAGGAGAAGTCGTAACAAGGTTTCC
1600	af415e311ed047eb4fee5a08e4faaa15	OTU_1600	131	203	8	GTCGCTCCTACCGATTGAATGATCCGGTGAATAATTCGGACGAGCGTCTTGACCGGTCCGCTGGTCTTGCATGCTTGAAAGTCTAGTAAACCTTATCATTTAGAGGAAGGAGAAGTCGTAACAAGGTTTCC
1601	31970b0bbb7ebcc64db5413985f11efb	OTU_1601	136	203	4	GTCGCTACTACCGATTGAATGGTTTAGTGAGATTTTTGGACCGGAGCTCTCTTGTTCAGCAATGAATGAGAGGGATACTGGGAAGCTAATCTAACTGTATCATTTAGAGGAAGTAAAAGTCGTAACAAGGTTTCCG
1602	f04f15bddb145e7b13bfa5a98c92009f	OTU_1602	133	203	2	GTCGCTACTACCGATTGAATGGTTTAGTGAGGCCTCCTGATTGGCGCCGATATTCTGGCAACAGAGCGTCGGATGCCGGGAAGTTGGTCAAACTTGATCATTTAGAGGAAGTAAAAGTCGTAACAAGGTTTCC
1603	d989aed48b909fe5f985d0e75e6ffbb8	OTU_1603	136	203	4	GTCGCTACTACTGATTGGGTTGTTAAGCCAGCCGCTCGGAAGCTTCTTACATGCCCGCCCGGGAATAATGTCTGAAAGTGGATGAAAAGCGAGCTTAACTTCCTAGAGGAAGTAAAAGTCGTAACAAGGTTTCCGT
1604	b744903ffc524b16398336e98ee989ce	OTU_1604	128	202	1	GTCGCTCCTACCGATTGAGTGATCCGGTGAATTGTTCGGACCTGCGAGTTCTCCGGCAACGGAGTTCTTGTGGGAAAGTTCTGTGAACCTTATCACTTAGAGGAAGGAGAAGTCGTAACAAGGTTTCC
1605	497c26748b2cb2260ac59ab9dc25b7bb	OTU_1605	137	202	1	GTCGCTACTACCGATTGAATCGTTTAGCGAGAACTTTGGATCGGAACCCTGGTGGTCAGCAATGACCGCCCGGGACTTCACGAGAAATCGTTCCAGCTTGACGATTTAGAGGAAGTAAAAGTCGTAACAAGGTTTCC
1606	f0a29c976bac21594aa76c95c980bad9	OTU_1606	104	202	4	GTCGTTTCTTCCGACTGATACTCATTGTGAATTGCGGGGAAGTTTATCTGTAACCGCTGTGAATGCTGGGTATTGGAGGAAGAAAAAGTCGTAACAAGGTTATC
1607	89cb22d5f82256288b8882cd7cb40b28	OTU_1607	123	202	7	GTCGCTCCTACCGATTGAGTGGTCTGGTGAAGTATTCGGAGCTTCCCTTTGGCTTGTCTTTGGGGAGGCAAAGTTTAATAAACCAAACCACTTAGAGGAAGGAGAAGTCGTAACAAGGTTTCC
1608	519c39b4755f4cd6685aafde8b4d652d	OTU_1608	136	202	3	GTCGCTCCTACCGATTGAATGGTGCGATGAAATCTTTGGAGACAGACTCCGCGTCCAGTTCTGCTGGACAAAGAGACCGTCAAAATTGCTTAAATCTTGCCATTTAGAGGAAGGAGAAGTCGTAACAAGGTTTCCG
1609	e07d42223d3499dde907a677c625df22	OTU_1609	106	202	7	GTCACATCATGAAAGTCGATTGTACCCGAAGTCGCCGAGTTAACCGCAAGGAGACAAGCGCCGAAGGTATGGTTGGTAATAGGGATGAAGTCGTAACAAGGTAGCC
1610	561e77cd34e378d93fa847bacf57b34a	OTU_1610	108	201	5	GTCACATCACGAAAGCTGGCTGTACTAGAAGTCGCCGAGCTAACCCGCAAGGGGGGCAAGCGCCTAAGGTATGGTTGGTGATTGGGGTGAAGTCGTAACAAGGTAGCT
1611	4062a870ec66848dbaee5541e82b2b6d	OTU_1611	139	201	4	GTCGCTACTACCGATTGGATGGTTTAATGAGATTTTCGGACTGGAGCCGGGCCGGGCCGGCAACGGTGCGGCTTTGGTGCTTCGGGAAGTCAATCTAATTGCATCATCTAGAGGAAGTAAAAGTCGTAACAAGGTTTCC
1612	9e037e0d4bbd0b9b7b49195f80a79be3	OTU_1612	132	201	1	GTCGCTCCTACCGATTGAATGTGTTGGTGAGGAGTTCGGATCGGCAGTTAGTGGTGGTTCGCCACTGCTTGCAGCTGAGAAGTCCTCCAAACCGCCCCATTTAGAGGAAGGAGAAGTCGTAACAAGGTTTCC
1613	d934a3cbef228dd45a868c7db7d43ba7	OTU_1613	131	200	1	CGTCGCACCTACCGATTGAATGGTCCGGTGAAACTTCGGGACTGAGCGATTGTTGCTTCATTGTGACTTTTGCTTGGAAACTTATTTAAACCTTATCATTTAGAGGAAGGTGAAGTCGTAACAAGGTTTCC
1614	119f43c89d0882ee361776859d4dd80f	OTU_1614	108	200	2	GTCGCTTCTACCGATTGAGTGGTCCGGTGAACCCTTCGGACGCGCTCCCGCGCAAAAGTCGAGTGAACCTTGCCACTTAGAGGAAGAAGAAGTCGTAACAAGGTGTCC
1615	88bcd7ed478fb5878c5dd3d81bf7d9d4	OTU_1615	131	200	5	CGTCGCACCTACCGATTGAATGGTCCGGTGAAGCCTCGGGATTGTGGTTGGTTTCCTTTATTGGAGATTGATTGCGAGAACTTGTCTAAACCTTATCATTTAGAGGAAGGTGAAGTCGTAACAAGGTTTCC
1616	8fa4cfdac6e494c18fada38fcf71251c	OTU_1616	133	200	9	GTCGCTACTACTGATTGGACGTTTAAGCGAGATCTTCGGACTCCGGGTTCATGGTTCATCTGGACCTAGAACTATGGGGGAAGTAGGTCAAGCTTTGGTGTCTAGAGGAAGTAAAAGTCGTAACAAGGTTTCC
1617	b37fbf958aaf7c400dad3d9c46ddb08c	OTU_1617	131	200	2	CGTCGCACCTACCGATTGAATGGTCCGGTGAAGCCTCGGGATTGTGGCCAGTTCGCTTTATTGGGAGTTGGTTGCGAGAACCTGTCTAAACCTTATCATTTAGAGGAAGGTGAAGTCGTAACAAGGTTTCC
1618	babe2ecd8d812765056a1e96623ccf32	OTU_1618	131	199	1	CGTCGCTCCTACCGATTGAGTGATCCGGTGAATAATTCGGACCCGACTTCGGATGAGTTCGCTCAACCAAAGCTGGGAAAGTCTAGTGAGCCTTATCACTTAGAGGAAGGAGAAGTCGTAACAAGGTTTCC
1619	24afeaea4d55cf07cc1c7af384240ae7	OTU_1619	137	199	1	GTCGCTACTACCGATTGGATGGATTAGTGAGATCTTTGGATTGGCACTATGGAGGCACCTCGCGTGCTCCCTTAGCTCGCTGAGAAGTTGCTCAAACTAATTTATCTAGAGGAAGTAAAAGTCGTAACAAGGTTTCC
1620	9bf33114bb9a5a3fff51165ccb482d2f	OTU_1620	131	199	1	CGTCGCTACTACCGATTGAGTACATTAGTGAGGACCTCGGATTGATTTCTCTGCGACGTCAGTCGCATTGATTTTGAAAAGTGGTTCGAACTGCTGTATTTAGAGGAAGTAAAAGTCGTAACAAGGTTTCC
1621	42ac7253a9876424d39833c69116c222	OTU_1621	140	199	2	GTCACGCCCTGAGAATTTGATTTACCCGAAGATTTTTTATTTATAGTAAGGACATTATTTTCTTGAGATGGAGATGTAATTAGTAAAATTATAATCGAGTGTAAATTTCAGGATTGGGGCGAAGTCGTAACAAGGTAGTC
1622	79118ffdf528cc5e3ff9f8bb554d4112	OTU_1622	108	199	3	GTCACAGCATGAAAGTTGTCAGCACCCGAAATTGTCTTAGCTAACCGTCAAGGAGGCGGGCAATGAAGGTGAGGGTGATGATTGGGCTGAAGTCGTAACAAGGTAGCA
1623	3831234da201950b5d758bd5af2d6a89	OTU_1623	106	199	2	GTCACACCATGGGAGTGGGATGCAAAAGAAGTAGGTAGTCTAACCTTCGGGAGGACGCTTACCACTTTGTGTTTCATGACTGGGGTGAAGTCGTAACAAGGTAACC
1624	e506c75546144387f5a7ee8e44ad885b	OTU_1624	113	199	4	GTCGCTCTTACCGATGAATTGCATCAGTGAGTGGGTTCGGAGTTCTCATATTTGAGAGTGAAGACTTGCGAGCTATGCAATTTAGAGGAAAGAGAAGTCGTAACAAGGCATCT
1625	256efd6afb83c39e3adcf78eabad2c55	OTU_1625	132	199	2	GTCGCTACTACCGATTGAATGGCTTAGTGAGATTTCTGGATTGGCGTTAGGAAGCCGGCAACGGCATCCTTTGGCTGAGAAGTTACTCAAACTTGGTCATTTAGAGGAAGTAAAAGTCGTAACAAGGTTTCC
1626	617c924202291af45bd30e7c6a4b0c1f	OTU_1626	131	198	2	CCGTCGCACCTACCGATTGAATGGTCCGGTGAAGGCCTGGGATCTCGGTCGAATTCCTTTATTGGTTTTGGCCAGGAGAACTCGTCTAAACCTTATCATTTAGAGGAAGGTGAAGTCGTAACAAGGTTTCC
1627	6ab3075ff1d309ecd269ea5f2c1b84e0	OTU_1627	125	198	7	GTCGCTCCTACCGATTGAGTGATCCGGTGAATTATTTGGACCAAGGCGTCGGGTCATACTGACTGCCATGGGAAGTTTTGTGAACCTTATCACTTAGAGGAAGGAGAAGTCGTAACAAGGTTTCC
1628	d79f1877709bf52d61693f5ee2a66604	OTU_1628	131	198	6	CCGTCGCTCCTACCGATTGGATGATCCGGTGAATAATTCGGACTGCGGCGTTGCTCGGTTTCCGAGCTTCGCTGCGGGAAGTTTAGTGAACCTTATCATCTAGAGGAAGGAGAAGTCGTAACAAGGTTTCC
1629	2c0d3d12eaf07ecc64f3a7505d62c5c8	OTU_1629	131	198	3	CCGTCGCTCCTACCGATTGAGTGATCCGGTGAATAATTCGGACTGCAGCAGTGTTCGGTTCCTGAACGTTGCCGTGGAAAGTTTAGTGAACCTTATCACTTAGAGGAAGGAGAAGTCGTAACAAGGTTTCC
1630	c16ae534d6edbd16115e553338c04306	OTU_1630	132	198	4	GTCGTTGCTACCGATTTGGTTCACGCATAGAGAAGTCAGGAGGTTCCGGCTTCAGGGCAACCTGTTTGCTTGTGAACCGAATTTCTTCAATATGTGTATACTAGAGGAAGCAAAAGTCGTAACAAGGTTACT
1631	8531b4c99762d216145f707c21c1f4ac	OTU_1631	121	198	1	GTCGCTCCTACCGATTTCGAGTGATCCGGTGAACCTTTCGGACCGGAGAAGCCTTGTGCCGATCTGGGAAGTCAAGTAAACCACATCACTTAGAGGAAGGAGAAGTCGTAACAAGGTTTCC
1632	6b83684ba4fcad3110e1b0412d3d6910	OTU_1632	108	197	1	GTCACACCATGGGAGTTGGTTTTACCCGAAGGCGGTTCGCCGACCCGTAAGGGAGGCTGCCGACCACGGTAAGGTCAGCGACTGGGGTGAAGTCGTAACAAGGTAGCC
1633	70a2f6ca5132c83dccf140cacc455e30	OTU_1633	131	197	6	CGTCGCTCCTACCGATTGAGTGATCCGGTGAATAATTCGGACCGAAACTTTCTACGGTTCGCTGTAGATCGTCACGGAAAGTTTAGTAAACCTTATCACTTAGAGGAAGGAGAAGTCGTAACAAGGTTTCC
1634	903abaf10770e96985b50bfb43ed2f7e	OTU_1634	131	197	3	CCGTCGCTCCTACCGATTGAGTGATCCGGTGAATAATTCGGACTGCGGCTTTGTTCAGTTTCTGAACGTTGTCGTGGAAAGTTTAGTGAACCTTATCACTTAGAGGAAGGAGAAGTCGTAACAAGGTTTCC
1635	ffbd79a09001b2fa4290154d71cc1e82	OTU_1635	126	197	5	GTCGCTCCTACCGATTGAGTAATCCGGTGAATACCTCAGACGACAGTCAACTGATTCTTCAGCTGATTGAAGGAAGTTTTATGAATCTTATCACTTAGAGGAAGGAGAAGTCGTAACAAGGTTTCC
1636	97bb5e8dfb7d6ee4bf13ba2160db692d	OTU_1636	131	197	12	CGTCGCACCTACCGATTGGATGTTTCGATGAAGCCCTCGGACCGTCGCGCGTCTCCTTCATTGGCGACGCGTGGTGGGAAGTTGTCTAAATCTCAACATCTAGAGGAAGGTGAAGTCGTAACAAGGTTTCC
1637	d2b27540fce64d37a91a5a74e10560a5	OTU_1637	131	197	5	CCGTCGCTCCTACCGATTGCATGATCCGGTAAATAATTCAGGTCATTGCTGGGATTAGGAAACTAACATTGCATTGGGAAGTATTGTAAACCTTATCACTTAGAGGAAGGAGAAGTCGTAACAAGGTTTCC
1638	ffbdae6ec78c4d479a4c9e1ff004e325	OTU_1638	113	197	7	GTCAAGCCACCCAAGCAGGATGCACCCGAAAACATTATATCTAACCAGGGTAACCTGGAGGAAAATGTTGAAGGAGTGTTTTGTGAGGAGGACTAAGTCGTAACAAGGTAGTC
1639	82801ec287aa0cd4fdebf2805210fa40	OTU_1639	132	196	3	GTCGCTACTACCGATTGAATGGTTTAGTGAGATCTTCGGATTGGCACCGTCGCGGCCTCACGGAAGTGATGGTGCCGAAAAGTTGCTCAAACTTGATCATTTAGAGGAAGTAAAAGTCGTAACAAGGTTTCC
1640	e56e4c521fa0926a5984d09d00667b7e	OTU_1640	108	196	6	GTCACATCACGAAAGCTGGTTGCACCTGAAACCGGTGAGCTAACTCGCAAGAGAGGCAGCCGTTTACGGTGTGATTGGTGATTGGGGTGAAGTCGTAACAAGGTAGCT
1641	e64f11d033bb75fd1171c16dd7cc892d	OTU_1641	133	196	6	GTCGCTCCTACCGATTGAATGATCCGGTGAGGCCCCCGGATTGTGGCAATGGCTCTGGTTCGCTAGACCAATGCTGCGAGAAGCTGTCCAAACCTTATCATTTAGAGGAAGGAGAAGTCGTAACAAGGTTTCC
1642	486783b4cbcfdb66ef8a5c4b550683b7	OTU_1642	131	196	7	CGTCGCACCTACCGATTGAATGGTCCGGTGAAATTCTCGGACGCGAACGACAGATGTTCATTCGGATGTCGTTTGTGAAAGTTAATTAAACCTTACCATTTAGAGGAAGGTGAAGTCGTAACAAGGTTTCC
1643	90410cc6852fb2308da203f3f424638f	OTU_1643	131	196	3	CGTCGCACCTACCGATTGAATGGTCCGGTGAAGCCTCGGGATTGTGACTAGTTACCTTTATTGGTGGCTTGCTGCGAGAACTTGTCTAAACCTTATCATTTAGAGGAAGGTGAAGTCGTAACAAGGTTTCC
1644	6a42cb4b25fca9dab093c28ad03164e1	OTU_1644	132	196	1	GTCGCTACTACCGATTGAACGTTTTAGTGAGGTATTTGGACTGGACCTGGCCGGGTTAACGCCTGGCTTGTTGTCCGGGAAGACTCCCAAACTTGAGCGTTTAGAGGAAGTAGAAGTCGTAACAAGGTTTCC
1645	b5b23c0c9bd68c5ab4d21484b7d5fdc7	OTU_1645	132	195	5	GTCGCACCTACCGATTGAATGGTCCGGTGAAATTTTCGGACCGCGTCTTTGTCGCCTTTATTGGAGACGCTGCCGTGGGAAGTTACTTAAACCTTACCATTTAGAGGAAGGTGAAGTCGTAACAAGGTTTCC
1646	8ecb598fb18ca017eae7a2f7b3f642e2	OTU_1646	136	195	1	GTCGCTACTACCGATTGAATGATTTAGTGAGGTCTTCGGACTGGTGCGCGGCAATGTCTCGGCATTGCCGATGTTGCCGGGAAGATGACCAAACTTGATCATTTAGAGGAAGTAAAAGTCGTAACAAGGTTTCCGT
1647	fdd0c74d890836efe72c4eee5a6dac6d	OTU_1647	131	195	1	CCGTCGCTCCTACCGATTGAATGATCCGGTAAGACCTTTGGACTGTTCACTGTTTGATTCGTCAGACTGTGATGCGGGAAGTTGATCAAACCTTATCATTTAGAGGAAGGAGAAGTCGTAACAAGGTTTCC
1648	91ccade4137b44947c9a18c9e3265d45	OTU_1648	131	195	2	CGTCGCACCTACCGATTGAATGGTCCGGTGAAGCCTCGGGATTGTTGTTAGTTTACTTTATTGTGAATTGATAGCGAGAACTTGTCTAAACCTTATCATTTAGAGGAAGGTGAAGTCGTAACAAGGTTTCC
1649	cdbad1547931282974ac8edfff9aa51f	OTU_1649	132	195	2	GTCGCACCTACCGATTGAATGGTCCGGTGAAATCTTCGGACTGTGACTTTGATTTGTTAACTCAAAACGCTGTTATGGGAAGTTGATTAAACCTTACCATTTAGAGGAAGGTGAAGTCGTAACAAGGTTTCC
1650	0ced56cbd74afde92c329c5ac6a3603d	OTU_1650	136	195	5	GTCGCTACTACCGATTGAATGGTTTAGTGAGGACTTTGGATTGCCGCCGTCGCATCCTCAGGGAAGCGGTCGGAGGGTGAGAAGCTGTCCAAACTTGATCACTTAGAGGAAGTAAAAGTCGTAACAAGGTTTCCGT
1651	c15c0c136f9360f4fd6b295039f7e4ec	OTU_1651	127	195	4	GTCGCTCCTACCGATTGAGCAATCCGGTAAACAATTAGGATTGATGTAAAGTAGATTATCTACTGAATGGAAATAAATATCGTAAACCTTATTGCTTAGAGGAAGGAGAAGTCGTAACAAGGTTTCC
1652	fa79e70362dbca6be18aa29bde7369f8	OTU_1652	106	195	2	GTCACACCATGGGAGTGGGCTGCACCAGAAGTGGATAGTTTAACCTTCGGGAGAACGTTCACCACGGTGTGGTTCATGACTGGGGTGAAGTCGTAACAAGGTAGCC
1653	5a98452ff7139e100d02ea3e0f21b49c	OTU_1653	106	195	1	GTCACACCATGGAAGTTGGTTACACCTTAAGGCAAATTGTCAACCTTCGGGAGACATTTGACTACGGTACGATCAGCAACTGGGGTGAAGTCGTAACAAGGTAGCC
1654	b3a14624db9a60464dff20fdad9d1ba9	OTU_1654	107	194	6	GTCACATCACGAAAGTCGGCTGTACCGGAAGTCGGTGGGCCAACCCTTTGGGAGGCAACTGCCCATGGTATGGTCGGCGATTGGGGTGAAGTCGTAACAAGGTAGCT
1655	ee0099358d26055b2c572ea2605cdc05	OTU_1655	132	194	6	GTCGCTACTACCGATTGAATGGTTTAGTGAGATCTCGGGATCGGCTCTTACGAGCTGGCAACAGCTTATTTGAGCCGAGAACTTGCTCAAACTTGATCATTTAGAGGAAGTAAAAGTCGTAACAAGGTTTCC
1656	f4983cdfaeae14deaf13e9bebbb0b8b6	OTU_1656	122	194	3	GTCGCTCCTACCGATTGAGTGATCCGGTGAATAATTCGGACTGCGGCACGTCAGCTGACGTGCTGCGGGAAGTTTAGTGAACCTTATCACTTAGAGGAAGGAGAAGTCGTAACAAGGTTTCC
1657	8f95ff2a43b4258b5296705f31939c7c	OTU_1657	132	194	4	GTCGCTGCTACCGATTGGATGGTCCGGTGAGAACTCTGGATTGTGGTTGTTGTGCCGGTCTCCGGTGCTCGACTGCGAGAAGTTGATCGAACCTTATCATCTAGAGGAAGCAAAAGTCGTAACAAGGTTTCC
1658	dd42704ea2739492062aa95e7f626492	OTU_1658	136	194	6	GTCGCTACTACCGATTGAATGGTTTAGTGAGGTCTTCGGATTGGAGCCATCGTGGCTTCACGGCCGGGACGGATATCCGAAAAGTTGATCTAACTTGATCATTTAGAGGAAGTAAAAGTCGTAACAAGGTTTCCGT
1659	8427d5b716bf78b1cc5062ebb3bdbcbd	OTU_1659	131	194	2	CCGTCGCTCCTACCGATTGAGTGATCCGGTGAATCATTCGGACTGATGCAGTGCTCAGCTTCTGGGCGTTGCGTTGGAAAGTTTCATGAACCTTATCACTTAGAGGAAGGAGAAGTCGTAACAAGGTTTCC
1660	1482b730f122252af447dea49de012c3	OTU_1660	123	194	11	GTCGTTGCCTGTGATGGATTGTGAGTAGAGCCATCTGGAGGTGTGAGATGGGGCAACCTTTCTTATGCCAAAATTTGGCAATACTCCCAATCTAGAAGAGGCAAAAGTCGTAACAAGGTACTT
1661	5e7cce946b8ecdca351ffb514eb21ba9	OTU_1661	127	194	5	GTCGCTCCTACCGATTGAGTGATCCGGTGAATAATTCGGACTGCGAAGGGCCCGGTTTCCGAGTCCTTTGTAGGAAGTTTAGTGAACCTTATCACTTAGAGGAAGGAGAAGTCGTAACAAGGTTTCC
1662	74b4da0c42ef24d7f9dc5b57099cc0b8	OTU_1662	131	193	1	CGTCGCTCCTACCGATTGGATGAATCGATGAGTCGTTTGGAGGTCCCTACGAAAGGTTTCGGCCCGGAGTAGAGACCAAAATTCTGCAAATCTGTTCATCTGGAGGAAGGAGAAGTCGTAACAAGGTTTCC
1663	4db1c3717169c700981cc04f3347da59	OTU_1663	131	193	4	CGTCGCACCTACCGATTGAATGGTCCGGTGAGGCCTCGGGATTGTGGACACGTTCCTTAGTTGGGGTGTGACCGCGAGAACTTGTCCAAACCTTATCATTTAGAGGAAGGTGAAGTCGTAACAAGGTTTCC
1664	2ad56c0d7324d270635ce2be9ba95060	OTU_1664	132	193	2	GTCGCACCTACCGATTGAATGACTAGGTGAAAAGTCGAGACTGTGGTTTCGCTTGATTCATTTCAAGCTTAACTGTGGGAACCTCTTTTAACCTATTTATTTAGAGGAAGGTGAAGTCGTAACAAGGTTTCC
1665	2cc3a5d08bfd5c9459a925485e7fbcf9	OTU_1665	106	193	4	GTCACACCATGGGAGTGGGATGCAAAAGAAGTAGTTAGTTTAACCTTCGGGAGAACGATTACCACTTTGTGTTTCATGACTGGGGTGAAGTCGTAACAAGGTAACC
1666	63c454e34c8f4608745373c44ea6a718	OTU_1666	123	192	10	GTCGCTCCTACCGATTGAGTGGTCTGGTGAAGTATTCGGAGCCTCCCTTTGGCTTGTCTTTGGGGAAGCAAAGTTTAATAAACCAAACCACTTAGAGGAAGGAGAAGTCGTAACAAGGTTTCC
1667	5d38af757e68c3f6862b74d632ea29fa	OTU_1667	108	192	1	GTCACGTCATGGAAGCCGGTTTTGCCCGAAGTATGTTTGCCAACCCGCAAGGGAGGCGATGTCCTAAGGTGAGGCTGGTAACTGGGACGAAGTCGTAACAAGGTAGCC
1668	71cd6476c10e25437d98c5f3c7f1a7c0	OTU_1668	136	192	1	GTCGCTCCTACCGATGAATGTTCCGATGAAATTTTCGGAGAGTGCCTGTGAAGCAGGCTCCGCCTGTCGAACGGGATGCTCAAAGTCACTTAAATCTGAACATTTCGAGGAAGGAGAAGTCGTAACAAGGTTTCCG
1669	82b8378343e0b29d3585ae5edc79634b	OTU_1669	133	192	1	GTCGCTACTACCGATTGAATAACAGGGTGAAATCTTCGGACTGTGGCAATTCTATGGCCTAGCCATACTTTGTCCGTGGGAGGTCGCTTAAATCCTGTTATTTAGAGGAAGTAAAAGTCGTAACAAGGTTTCC
1670	8e7298c0b5ea010b0cfabe54abf5e199	OTU_1670	131	192	3	GTCGCTTCAACCGATTGGATGATCCGGCCAAGTGCACGGACGAGTGACATTCCGTGTTCCACGCGGGATTACGCTCGAAAGTGCAGTGAACCTTATCATCTAGAGGATGAAGAAGTCGTAACACGGTATCC
1671	c3528950c2f3b4152df534b31eca86ed	OTU_1671	136	192	11	GTCGCTACTACCGATTGAATGGTTTAGTGAGGCGTCTGGATCGGCGCCTGCGACGCCTGGCGACAGGCCCGCGGGAGGTCGAAAAGTTCGCCGAACTTGATCATTTAGAGGAAGTAAAAGTCGTAACAAGGTTTCC
1672	0ac97092050a52c2d1e40cfaa839c5f6	OTU_1672	131	192	6	CGTCGCTCCTACCGATTGAGTGATCCGGTGAATAATTCGGACTGCAGCAGTGTCCTGTTCGCTGGACGTTGCAGCGGAAAGTTTAGTGAACCTTATCACTTAGAGGAAGGAGAAGTCGTAACAAGGTTTCC
1673	51924935dbf195a052f51f205bee25b4	OTU_1673	131	191	3	GTCGCTCCTACCGATTGAGTGGTCCGGTGAGGCTTCGGGAGAGCTAATTGGATTGTGTTTCACAAACTATTTGGCTTGAACTTAGTCAAACCTTACTACTTAGAGGAAGGAGAAGTCGTAACAAGGTTTCC
1674	2b7021282d658b244616db4ecfdbf97e	OTU_1674	124	191	1	GTCGCTCCTACCGATTTCGAGTGGTCCGGTGAATCTTTCGGACTGCGCGTAGCTTCGTGCTGTGTCGCGGAAAGTCAGGTAAACCTTATCACTTAGAGGAAGGAGAAGTCGTAACAAGGTTTCC
1675	d8e22fc3d9d59623541bf25a3748e8fc	OTU_1675	123	191	5	GTCGCTACTACCGATTTCGAGTGGTCAGGTGAATCTTTCGGACTGTGGAAGGCCTCGAGTTTTTCGCGGAAAGTCAGGTAAATCTTATCACTTAGAGGAAGTAAAAGTCGTAACAAGGTTTCC
1676	17cd84c0ec5aaa89d31e74ab0c803478	OTU_1676	106	191	10	GTCAAGCCACGAAAGCTGAGAGCGCCCGAAGTCGCTAGTCCAACCGCAAGGAGGACGGCGCCGAAGGCGAGCTTGGTGATTGGGACTAAGTCGTAACAAGGTAGCC
1677	2139851645f1e7526e60c5fc6db686fd	OTU_1677	127	191	3	GTCGCTTCTACCGATTGAGTGATCCGGTGAATAATTCGGACTGCTGCTTCGCTGGTCTCCAGTGTTGCGGTGGGAAGTTTCGTGAACCTTATCACTTAGAGGAAGAAGAAGTCGTAACAAGGTTTCC
1678	0f0594fdd72523b5f5b78ac29a400d28	OTU_1678	109	191	3	GTCACATCACGAAAGTCGGTTGCACCTGAAACCGGTGGGCTAACCCTTTTGGGGAGGCAGCTGTTTACGGTGTGATCGGTGATTGGGGTGAAGTCGTAACAAGGTAGCT
1679	906b6430bef3afb9f00768188fbb2ce6	OTU_1679	131	191	1	CGTCGCACCTACCGATTGAATGGTCCGGTGAAAACCTCGGATTTCTGGTTATTTCTAGCAATGGAGATTTTCGGGAAGAAGTCGTTTAAACCTTACCATTTAGAGGAAGGTGAAGTCGTAACAAGGTTTCC
1680	a03ec4d8e5a8ca7258c9faa8a7ff9df3	OTU_1680	131	190	8	GTCGCACCTACCGATTGAATGGTCCGGTGAAGCTTTCGGACCTCGGCAATGTCGCCTTAACGGGGACGCTGCTATGGGAAGTTAGTTAAACCTTACCATTTAGAGGAAGGTGAAGTCGTAACAAGGTTTCC
1681	809670fa58c5f391bf426487af51bac5	OTU_1681	106	190	1	GTCACACCCTGGAAATTGTTTCTAATTGAAGCTTGTTACCTAACCGTAAGGAGGGAATCTGTGAGATTGGAGAGAGTGACTGGGGTGAAGTCGTAACAAGGTAGCT
1682	9b63109e7aa0a80cc9031365bead1853	OTU_1682	128	190	5	GTCGCTCCTACCGATTGAGTGATCCGGTGAATAATTTGGACTGCTGCATTGTTCAGTTACTGACATTGCAGTGGGAAATTTCGTGAATCTTATCACTTAGAGGAAGGAGAAGTCGTAACAAGGTTTCC
1683	e0bce003d0ec09fcc1cf328bbdd41e27	OTU_1683	127	190	2	GTCGCTCCTACCGATTGGATGATCCGGTGAGCTATTCGGACTTTCGCATTGTCGATTTTCGGCTTTACGAGGGAAAGTCTCGCGAACCTTATCATCTAGAGGAAGGAGAAGTCGTAACAAGGTTTCC
1684	6a0a9993dad80620c1883a4b2b120aa9	OTU_1684	131	190	3	CCGTCGCTCCTACCGATTGAGTGATCCGGTGAATAACTCGGACTGCGGCATTGTTCAGCTCCTGGACGTTGCTGCGGAAAGTTTAGTGAACCTTATCACTTAGAGGAAGGAGAAGTCGTAACAAGGTTTCC
1685	e2f53f0f40ffced9513de640ba7d7e48	OTU_1685	127	190	2	GTCGCTCCTACCGATTGAATGATCCGGTGAATATTTCGGACTGCGAAATTTGCAGTTTCTGTTGATTTTGCGGAAAGTTGAATAAACCTTATCATTTAGAGGAAGGAGAAGTCGTAACAAGGTTTCC
1686	2eaf7db9023fc6b4038db00a6dba04e9	OTU_1686	131	190	5	CCGTCGCTCCTACCGATTGAGTGATCCGGTGAATAATTCGGACTGCAGCATTGTTCAGTTCCTGAACTTTGCAGCGGAAAGTTTAGTGAACCTTATCACTTAGAGGAAGGAGAAGTCGTAACAAGGTTTCC
1687	66c00c219c7d84b8bfaa39e6001934a3	OTU_1687	121	189	2	GTCGCTCCTACCGATTTCGAGTGGTCCGGTGAGCCTTTCGGACTGTGAAGGCCTTGAGTCAACGCGGAAAGTCAGGCAAATCTTACTACTTAGAGGAAGGAGAAGTCGTAACAAGGTTTCC
1688	589d1fefc0d79bb2bdf320001280c7eb	OTU_1688	132	189	1	GTCGCACCTACCGATTGAATGATTCGGTGAAGATTTCGGACTGTGTCGCCGTACCCTTCATTGGGCGTGGTGACGCGGGAAGTTATTTAAACCTCATCATTTAGAGGAAGGTGAAGTCGTAACAAGGTTTCC
1689	f34c50be9f9139ac4b628d4a4344eda0	OTU_1689	124	189	1	GTCGCTCCTACCGATTTCGAGTGGTCCGGTGAATCTTTCGGACTGCGCGCGGCCTTGAGTCGTGTCGCGGAAAGTCAGGTAAACCTTATCACTTAGAGGAAGGAGAAGTCGTAACAAGGTTTCC
1690	362d48434324c6f6ad6966e3146ce9d1	OTU_1690	100	189	4	GTCACACCATGGGAGTTGATTTCATTCGAAGCGGGGATGCTAAAGTAGCTACCTTCCACAGTGGAATCAGCGACTGGGGTGAAGTCGTAACAAGGTAACC
1691	9461f632f01cff42825b48628ceab309	OTU_1691	131	189	5	CCGTCGCTCCTACCGATTGAGTGATCCGGTGAATAATTCGGACCGCCGCATTGCTCAGTTCCTGAGCGTTGCAGTGGAAAGTTTAGTGAACCTTATCACTTAGAGGAAGGAGAAGTCGTAACAAGGTTTCC
1692	3e12e493a2a8d7b6813e7aeb82b0872e	OTU_1692	131	189	8	CGTCGCACCTACCGATTGAATGGTCCGGTGAGGCCTCGGGATCGTGGCAAGCTTCCTTTATTGGAGGTGAGCTGTGAGAACTTGTCCAAATCTTATCATTTAGAGGAAGGTGAAGTCGTAACAAGGTTTCC
1693	c48ace17415527400526b292d9f698e9	OTU_1693	106	189	3	GTCAAGCCACGAAAGTTGGGAGGGCCCGAAGTCGCTGAGTTAACCGCAAGGAGACAGGCGCCGAAGGTCAGCTCGACAATTGGGACTAAGTCGTAACAAGGTAGCC
1694	93769e3f42e1f2ab0777c52abd15ee41	OTU_1694	128	189	3	GTCGTTGCTACTGATTGGCTGTAGGGTAGAGATCGGCGGATTCCGAGCTGTTGGGGCAACTCTTCAGTTTGGGAGAAACCTATCAATATTCTGCAGCTAGAAGAAGCAAAAGTCGTAACAAGGTTGCT
1695	36a7434e45e7065bc925e74fee9c1865	OTU_1695	133	189	7	GTCGCACCTACCGATTGAATGGTCCGGTGAAATCTTTGGACTGTGGCTTTGACTTGCATATTGCAAGACTTTGCCGTGGGAAGTTGATTAAACCTTACCATTTAGAGGAAGGTGAAGTCGTAACAAGGTTTCC
1696	b6ad54bbdee7217259569f76dc8804ab	OTU_1696	131	189	4	GTCGCTCCTACCGATTGGATGAGTTGGTGAGTGGATTGGAGTAACAACTATCTTCTTGTAAGATTGTTGTGTTTGTTTAAAATTTGCAAACTAGATTATCTAGAGGAAGGAGAAGTCGTAACAAGGTTTTT
1697	f307a7a76fa5632dc3b15cde91637b8e	OTU_1697	133	189	6	GTCGCTACTACCGATTGAATGGTTTAGTGAGGACTTTGGATCGCTGCCGTCGCGTCCTCAGGACGCGATCGGAGGGCGAGAAGCTGTTCGAACTTGATCACTTAGAGGAAGTAAAAGTCGTAACAAGGTTTCC
1698	9bc9511979a537f436fa981de9660263	OTU_1698	136	188	5	GTCGCTACTACCGATTGAATGGTTTAGTGAGATCTTCGGATTGGAGCCGCCGCGGTCGGCAACGGCCAGGTGGATTTCGAGAAGTTGTTCAAACCAGATCATTTAGAGGAAGTAAAAGTCGTAACAAGGTTTCCGT
1699	c9c6a2f47ed03cd84f1c017d4f1b818c	OTU_1699	132	188	3	GTCGCACCTACCGATTGAATGGTCCGGTGAAATTTTCGGACTACGTCAATGTCGCCTTTATTGGAGACGCTGCCGTGGGAAGTTACTTAAACCTTACCATTTAGAGGAAGGTGAAGTCGTAACAAGGTTTCC
1700	737658a4e12c338de25b8fb2e896e30f	OTU_1700	131	188	8	CGTCGTTGCTACCGATTGGCTGTGGGATAGAGCTGGACGGAGATGCTCGTCGGGGGCTTTGTACCACTTCGAGTGTCAAATTTCAGCAATATTTCTCAGCTAGAGGAAGCAAAAGTCGTAACAAGGTTGCT
1701	387cf5a691cf0c5b74c66fd0ef51fa51	OTU_1701	145	188	4	GTCGCTCCTACCGATGTTTGGTCCGGTGAAATCTTAGGATTCGTAGCATACACTTGTTTTTGCTCTTTTGTGAAGATGAGTTTGCTGTGGAGAATTTGAGTAAACCTTGCCAAATAGAGGAAGGAGAAGTCGTAACAAGGTATTC
1702	9d59597029352e3da8402a28c9d9295d	OTU_1702	131	188	1	CCGTCGCTCCTACCGATTGAGTGATCCGGTGAATAATTCGGACTGCGACACTGTTCGGTTCCTGAACGTTGTTGCGGAAAGTTTAGAGAACCTTATCACTTAGAGGAAGGAGAAGTCGTAACAAGGTTTCC
1703	5b94e2dac0c497b38efeb966b3a09afb	OTU_1703	131	188	2	CCGTCGCTCCTACCGATTGAGTGGTCCGGTGAATTAGTCGGAAGATGTTAGGCTTCAGGCTCTGTCGTCTGATATCAGAAGTCTTGTGAACCTTACCACTTAGAGGAAGGAGAAGTCGTAACAAGGTTTCC
1704	444c06e6015ccc0cc81749e937c578ae	OTU_1704	131	188	2	CCGTCGCTCCTACCGATTGAGTGATCCGGTAAACAATATTGAGAGAACTGCGAACCATTCTGTGGAAAGTTGCAACCAACGCGTCGTGAACCATATCACTTAGAGGAAGGAGAAGTCGTAACAAGGTTTCC
1705	237d6b00a8e82994ffe2e55b434c12ca	OTU_1705	124	187	7	GTCGCTCCTACCGATTTCGGGTGGTCCGGTGAACCCTTTGGACCGGAGGCGGCCTCGTGCCGCCACCCGGGAAGTCGAGTAAACCACATCACCTAGAGGAAGGAGAAGTCGTAACAAGGTTTCC
1706	02b2aba67e6a22bf8368d54b3952c855	OTU_1706	121	187	1	GTCGCTCCTACCGATTTCGAGTGGTCCGGTGAATCTTTTGGATCGAGATAACCTCGAGTTGTCTTGAAAAGTCAGATAAACCATACTACTTAGAGGAAGGAGAAGTCGTAACAAGGTTTCC
1707	dfe4d2bb45f2d8737932687c9d8e6085	OTU_1707	136	187	2	GTCGCTTCTACCGATTGAAGTTTTCGGTGAATTTGCTGGAGGTTGTTTTTAGAAACTGGTTCGCCAGTGGATAGAATGACCAAAAGCAAATGAATCGATTGCTTTAGAGGAAGGAAAAGTCGTAACAAGGTTTCCG
1708	f169e8c0ba78e91488d108726680f242	OTU_1708	131	187	3	CCGTCGCTCCTACCGATTGAGTGATCCGGTGAATAATTCGGACTGGGGCATTGTTCAGTTCCTGAACGCTGTTCCGGAAAGTCTAGTGAACCTTATCACTTAGAGGAAGGAGAAGTCGTAACAAGGTTTCC
1709	65fa3cdcc2bc36abcc8b50aadd372ad0	OTU_1709	106	187	7	GTCAAGTCATGAGAGTCGACAGGGCCTGAAGTCGTTTGTCTAACCTTCGGGAGGACGGCGCCGACGGCCAGGTTGGTGATTGGGACTAAGTCGTAACAAGGTAGCT
1710	87ce1469b391a9931510a24fa7157a51	OTU_1710	131	187	6	CCGTCGCTCCTACCGATTGAGTGTTTCGGTGAATAATTCGGACTGCAACAATGTTTGGATCCCGAACGTTGTAGCGGAAAGTTTGGTGAACCTCAACACTTAGAGGAAGGAGAAGTCGTAACAAGGTTTCC
1711	5b27cd80cb6b8799d91ce90e9d369a41	OTU_1711	128	187	6	GTCGCACCTACCGATTGAATGGTCCGGTGAAGCCTCGGGATTGTGGCCGTTGCCTTTATTGGTGTCGGTTGCGAGAACTTGTCTAAACCTTATCATTTAGAGGAAGGTGAAGTCGTAACAAGGTTTCC
1712	d0e25383fa389cdf30142abb701d4d61	OTU_1712	132	187	6	GTCGCACCTACCGATTGAATGATTCGGTGAAAATTCCGGACTGTGGCTAGCTGTCCTTTACTGGGCGACCAGCCGTAGGAAGTTATTTAAACCTCATCATTTAGAGGAAGGTGAAGTCGTAACAAGGTTTCC
1713	f3694d173edfac4e4d2f52349b91b76c	OTU_1713	108	187	1	GTCAAGCCACCCAAGCAAGATGCACCCAAAATCGCCTGCCTAACCCGTAAGGGAGGGAAGTGCCTAAGGTGTGTTTTGTGAGGAGGACTAAGTCGTAACAAGGTAGTC
1714	5c8ff7e27f633526d3ea5e0ceeb20e24	OTU_1714	110	186	5	GTCACACCACGAAAGCTGCGTGTACCAGAAGTCGCTGGGCTAACCCCTTACGGGGAGGTAGGTGCCGAAGGTATGCGGGGTAATTGGGGTGAAGTCGTAACAAGGTAGCC
1715	d01aa82cab49e3a56f0e042747044ad0	OTU_1715	133	186	1	GTCGCTCCTACCGATTGAATGATCCGGTGAGCTTTTTGGACTGTGATGACGGTTTCGGTTCGCCGGACTGCTGTCGCGGGAAGATACGCAAACCTTATCATTTAGAGGAAGGAGAAGTCGTAACAAGGTTTCC
1716	079c174b9597dabff8e4bbf0dc29b9d9	OTU_1716	131	186	1	CGTCGCTTCTACCGATTGAGTTTCTCGGTGAATACTTTGGACAAACCCTCTTAGCGGTTCGCCGCTTTTTGGGATTGAAAATTGAGTGAACCTCGAAACTTAGAGGAAGAAGAAGTCGTAACAAGGTTTCC
1717	4b0d2f4a6e8b0a6fa9e6ae1e034c7b0a	OTU_1717	131	186	3	CGTCGCACCTACCGATTGAATGGTCCGGTGAAGCCTCGGGATTGTGGTTAGTTTCCTTCATTGGAAGTTAGCCGCGAGAACTTGTCTAAACCTTATCATTTAGAGGAAGGTGAAGTCGTAACAAGGTTTCC
1718	444ab834e7001dc9d867dd00ceb862d9	OTU_1718	121	186	1	GTCGCACCTACCGATTGAATGGTCCGGTGAAGTCTTCGGACTGTGGCTTGTCTTGAACTCGCTGCGGGAAGTTGAGTAAACCTTACCATTTAGAGGAAGGTGAAGTCGTAACAAGGTTTCC
1719	511d3a543d35cbd01a2655097bbe073a	OTU_1719	123	186	3	GTCGCTCCTACCGATTTCGAGTGGTCCGGTGAACCTTTCGGACCGTGGACGCCCTCGTGGAGTCCGTGGAAAGTCAAGTAAACCACATCACTTAGAGGAAGGATAAGTCGTAACAAGGTTTCC
1720	099766544f6816345ddb8b87386c316d	OTU_1720	132	186	3	GTCGCACCTACCGATTGAATGGTCCGGTGAAATCTTCGGATCGAGACTTTGTTTTGTTTACTCAAAACGCTGTTTCGAAAAGTTGATTAAACCTTACCATTTAGAGGAAGGTGAAGTCGTAACAAGGTTTCC
1721	438418cb909c8015df8bd5e927d955da	OTU_1721	131	186	4	CGTCGCACCTACCGATTGAATGGTCCGGTGAAGCCTCGGGATTGTGACCAGTTTGCTTTATTGTGAGTTGGTTGCGAGAACTTGTCTAAACCTTATCATTTAGAGGAAGGTGAAGTCGTAACAAGGTTTCC
1722	e458b9d01c4eeda023008bc47e350ea5	OTU_1722	131	186	6	CGTCGCACCTACCGATTGAATGGTCCGGTGAAGCCTCGGGATTGTGATGAGTCTCCTTTATTGGGGATCTGTCGCGAGAACTTGTCTAAACCTTATCATTTAGAGGAAGGTGAAGTCGTAACAAGGTTTCC
1723	c1511b48628ac68a929a491de14783ee	OTU_1723	125	186	7	GTCGCTCCTACCGATTGAATGATTCGGTGAACTGTCTGGACTGTAGTATTTCTCTATTGAGAATACAATTGTAAGCTCTGTGAACCTAATTATTTAGAGGAAGGAAAAGTCGTAACAAGGTTTCC
1724	ae25cbecf505037db5e3edc3c6e74184	OTU_1724	131	186	7	CGTCGCACCTACCGATCGAATGGTCCGGTGAAGCCTCGAGATTGTGGTTAGTTTCCTTTATTGGATGTTAGCCGCGAGAACTTGTCAAAACCTTATCATTTAGAGGAAGGTGAAGTCGTAACAAGGTCTCC
1725	32ddae634b3d95c0ef7b28be0bb8de23	OTU_1725	131	186	1	CGTCGCACCTACCGATTGAATGGTCCGGTGAAGACTCGAGATTGTGTATGGCTTGCTTCACTGCATGTCACACATAAGAACTTGTCTAAACCTTATCATTTAGAGGAAGGTGAAGTCGTAACAAGGTTTCC
1726	3341c58dddceec1ff52a645259e19b6d	OTU_1726	128	185	4	GTCGCTCCTACCGATTGGATGATTCGGTAAGCTTTTGGGATTGACTGAACTACGCCATGTGCCGCGTTCATTGACAACTTAATCAAACCTAATCATCTAGAGGAAGGAGAAGTCGTAACAAGGTTTCC
1727	ed84df800de0db4ccce96ad264cc4219	OTU_1727	132	185	2	GTCGCACCTACCGATTGAATGACCCGGTGAAATCTTCGGATCGTCGTGTTGCCCGATTCATTTCGGGCGATGTGACGCAAAGTTGATTAAACCTTGCCATTTAGAGGAAGGTGAAGTCGTAACAAGGTTTCC
1728	e7fd6ea8570e93be52386fd22daf50f6	OTU_1728	108	185	1	GTCAAGCCACGAAAGTGGGGTGCGCCCGAAGTCGCCGAGCTAACCCGTAAGGGAAGCAAGCGCCGAAGGTGAACTCCGCGATTGGGACTAAGTCGTAACAAGGTAGCC
1729	7ccb50d51a571d7ec7df847a2f842d58	OTU_1729	131	185	1	CGTCGCTACTACCGATTGAACGTTTTAGTGAGGTCCTCGGATTGTGATACTGTTGGCTCACGCTGACTGTTTTGCGAGAAGACGACCAAACTGAAGCGTTTAGAGGAAGTAAAAGTCGTAACAAGGTTTCC
1730	546c1faa0e26306f4a22658cd2ec5169	OTU_1730	121	185	1	GTCGCTCCTACCGATTTCGAGTGGTCCGGTGAGCCTTTCGGACTGTGAAGGCCCTGAGTCAACGCGGGAAGTCAGGCAAATCTTACTACTTAGAGGAAGGAGAAGTCGTAACAAGGTTTCC
1731	12f85cbf92ac5cde5e08929301539a86	OTU_1731	132	185	1	GTCGCTACTACCGATTGAATGGCTTAGTGAGGCCTCCGGATTGCGCTTGCGGAGCGGGCAACCGCACCACGAGCTCGAGAAGCTGGTCAAACTTGGTCATTTAGAGGAAGTAAAAGTCGTAACAAGGTTTCC
1732	377b4bc6dd5e67a45a01165e6740cbda	OTU_1732	132	185	2	GTCGCTACTACCGATTGGGAAAATTTTAGAGAGTCCTGGACTGATGATTGTTCGGCTTCACGGCCTTACTTTCGTCGGGAAAGAATTCGATAATATTTTTCTAGAGGAAGTAAAAGTCGTAACAAGGTTTCC
1733	9d1251efb80d44be1cd876affce0324c	OTU_1733	127	185	9	GTCGCTCCTACCGATTGAGTGATCCGGTGAGTCCTTTAGAGTGTGTTGCATGTAGTTTCTACTCGTGACGTGTGAAGTTGAACAAACCTTATCACTTAGAGGAAGGAGAAGTCGTAACAAGGTTTCC
1734	31b14cf3ebb137ffe33e610b510a02a8	OTU_1734	131	185	2	CGTCGCACCTACCGATTGAATGGTCCGGTGAAGCCTCGGGATTGTGGCCAGTTCGCTTTATTGGGAGTTGGTCGCGAGAACTTGTCTAAACCTTATCATTTAGAGGAAGGTGAAGTCGTAACAAGGTTTCC
1735	ab92a7293f40bab62d16ecbe14fc51c1	OTU_1735	135	185	1	GTCGCTACTACCGATAGAATGGCTTAGTGAGGTCCCTGGATTCGCGCCGCCGCGAGCGGCAACGCTTGCGGTGGATGCGGAGAAGCTGACCAAACTGTGTCATTTAGAGGAAGTAAAAGTCGTAACAAGGTTTCT
1736	d25ae85f733023f102f2781a70e50e00	OTU_1736	131	185	8	CGTCGCACCTACCGATTGAACCATACGGTGAGGTCCTCGGATTTCGTGAGTTAACCTTCATTGGGAGACTCGCGAGAGAAGTTGCCCAAACCTCGTGGTTTAGAGGAAGGTGAAGTCGTAACAAGGTTTCT
1737	5ea1a1cff80392e9197000aef7ccc276	OTU_1737	231	185	2	GTCGCACCTACCGATTGAATGGTCCGGTGAAGCCTCGGGATTGTGGCTGGTTCCCTTTATTGGGAGTCGGTTGCGAGAACTTGTCTAAACCTTATCATTTAGAGGAAGGTGAAGTCGTAACAAGGTTTCCGTAGGTAAGCATAGCGCTGTGAAGATATTGACTTAGGTCTATGTAATTGGTTGGTCATAAATACAGTTTAACTAACAATTTGTCTTGTCTTACTTAACTAC
1738	93ce69f14f55e6076d9aba4585430e5c	OTU_1738	227	185	8	CTCAAACTTGGGAGCCAAACGAGCAACTAAAGCAAGGAGATAAACGGTTGATCCCAGGTCATAAAGATGCCGTTGTTGAGCCTTTTTGCGTTGCGGATGAAGCATGGGGAAATTTTCTGATCGCGATTTTCAATGAATGGGTTTTACACGATATCGGCAACGTGTTTGTGCAGTACTTTGAAGCCAGTATCGAAACCTGGATGGGCAGAAAAAACCCACTGTGTACG
1739	653ac979351f7bc3cb109e3d5b0d24e9	OTU_1739	131	185	8	GTCGCTCCTACCGATTGAGTGGTCCGGTGAGAATTTGAGAGGACTGCGCGAACTATGTTGCATAGATTGTCTGGTTTAAACTTGTTCAAACCTTATCACTTAGAGGAAGGAGAAGTCGTAACAAGGTTTCC
1740	18a629a5a0dc7f0ccc88f9da7dc26bca	OTU_1740	108	184	3	GTCAAGCCACGAAAGTGGGGTGCGCCCGAAGTCGCCGAGCTAACTCGCAAGAGAGGCAAGCGCCGAAGGTGAACTCCGCGATTGGGACTAAGTCGTAACAAGGTAGCC
1741	c7baf68fbe90d90a296e8b0671b337a5	OTU_1741	132	184	3	GTCGCTCCTACCGATTGAATGATCCGGTGAAAACTCAGGATTGGCGATTGTTGCTGGTCTCCAGCGACGATTGTCCGAGAATTTGTTTAAACCTTATCATTTAGAGGAAGGAGAAGTCGTAACAAGGTTTCC
1742	24f6b9ebe8ce1f4e704db482c9f2c6c9	OTU_1742	131	184	1	GTCGCACCTACCGATTGAATGGTCCGGTGAGACTTTCGGACCGCAGCGAAAGTTCATTCATTTGAGCTTAGCAGCGGAAAGTTATTCAAACCTTACCATTTAGAGGAAGGTGAAGTCGTAACAAGGTTTCC
1743	949737a08a870c9596dd3cccf214925e	OTU_1743	136	184	2	GTCGCTCCTACCGATTGATCGTTGTGATGAAATTTTCGGAGAGCGTCTTTGAGCCTGGTCCGCCAGGCGAAAAGTTGTCTCAAAGTCACTTGAATCCCGACGGTTAGAGGAAGGAGAAGTCGTAACAAGGTTTCCG
1744	0d39c51c4c6f70603cf054a9733d4d3e	OTU_1744	131	184	5	CGTCGCACCTACCGATTGAATGGTCCGGTGAAGCCTCGGGATTGTGGCTTTGTTCCTTCATTGGAACTTAACCGCGAGAACTTGTCTAAACCTTATCATTTAGAGGAAGGTGAAGTCGTAACAAGGTTTCC
1745	becb41ca18ca7731ec96dbd4b0406477	OTU_1745	122	184	1	GTCGCTCCTACCGATTGAGTGATCCGGTGAATAGTTCGGACTGCGGAATATCAGCTGATGTTCTGCGGGAAGTTCCGTGAACCTTATCACTTAGAGGAAGGAGAAGTCGTAACAAGGTTTCC
1746	04c2222ca88aa8b37434eacec0ce08ac	OTU_1746	136	184	6	GTCGCTACTACCGATTGGATGGCTTAATGAGAGCTCTGGATCTCTGCCGGCGCGGTCCTCACGGGTCGCGTTGGATGGGGAGAAGTTGCTCAAATTGAGTCTTCTAGAGGAAGTAAAAGTCGTAACAAGGTTTCCG
1747	1155b427e6eeb10a90cf2d8a10a41052	OTU_1747	131	184	8	GTCGCTACTACCGATTGAACGTTTTAGTGAGGTATTTGGATCGGACCTTGGCCGGTTCACGCCGGCCTTGTGTCTGAGAAGATTCCCGAACTTGAGCGTTTAGAGGAAGTAAAAGTCGTAACAAGGTTTCC
1748	53db5a8368a80646fab872191bf39d23	OTU_1748	131	184	4	GTCGCTCCTACCGATTGGATGAGTTGGTGAGTGGATTGGAGTAACAGCTATCTTCTGGTAAGATTGTTGTATTTTTTTAAAATTTGCAAACTAGATTATCTAGAGGAAGGAGAAGTCGTAACAAGGTTTTT
1749	142ddfb3a10fde2b7ef293b507322132	OTU_1749	132	184	6	GTCGCACCAATCGATTGAGTGTTCTGGTGAAAATGCAGGAGATTGTCTGATTTGGCTTTATTGCTGAGCCGGACGGTTGAATGCATTTAAACCAGTATACTTAGAGAATGGTGAAGTCGTAACAAGGTTTCC
1750	3d631419d11217488708841fc9e75881	OTU_1750	106	184	2	GTCACATCATGAAAGTCGATTGTACCCGAAGTCGCCGAGTTAACCGCAAGGAGACAAGCGCCGAAGGTATGATTGGTAATTGGGATGAAGTCGTAACAAGGTAGCC
1751	2c68c50623c4d4163974b28283011255	OTU_1751	131	183	1	CCGTCGCACCTACCGATTGAGTGGTCCGGTGAAGTCTCGAGATTGTGGCAATCTCCTTTATTGGAGTTTGATTGCGAGAACTTGCCTAAACCTTATCACTTAGAGGAAGGTGAAGTCGTAACAAGGTTTCC
1752	bf1d5366049380683590b48de74d92f8	OTU_1752	124	183	1	GTCGCTACTACCGATTTCGAGTGGTCCGGTGAAGCTTTTGGACTGCGCGTGGCTTCGTGCCGTGTCGCGGAAAGTCAGCTAAACCTTATCACTTAGAGGAAGTAAAAGTCGTAACAAGGTTTCC
1753	7f608655ead89e1c26a0087baf1f3f3b	OTU_1753	131	183	2	GTCGCTCCTACCGATTGAATGATCCGGTGAAAACTCAGGACTGGACGATACACTGCCTTGCGGCGGCGTTCGTGCGGGAATTTGTTTGAACCTTATCATTTAGAGGAAGGAGAAGTCGTAACAAGGTTTCC
1754	97591bbca00773107bf256d08bad5043	OTU_1754	131	183	2	CGTCGTTGCTACCGATTGGCTGTGGGATAGAGCTGGACAGAGATGCGTGTCGGGGGCTTTGTACCACGGCGTGTGTCAAATTTCAGCAATATTTCTCAGCTAGAGGAAGCAAAAGTCGTAACAAGGTTGCT
1755	eba958efd98b164d0997155eaa0d935b	OTU_1755	131	183	1	GTCGCTACTACCGATTGAACGTTTTAGTGAGGTATTTGGATTGGGCCTCGGGAGGTTTGCGCTTCCCTTGTGTCCGAGAAGACTCCCAAACTTGAGCGTTTAGAGGAAGTAAAAGTCGTAACAAGGTTTCC
1756	bd8b784100244c8d4df0324ebf43deb8	OTU_1756	131	183	6	CGTCGCTACTACCGATTGAACATTTTAGTGAGGTCCTCGGACTGTGAGCCTGGGGGGTCGCCCTGCCTGGTCTACGGGAAGACGACCAAACTGTAGTGTTTAGAGGAAGTAAAAGTCGTAACAAGGTTTCC
1757	f232d57cd7b544c4d8a42daf9c890f83	OTU_1757	125	183	9	GTCGCTCCTACCGATTGAGTGATCCGGTAAATGGCGTGGAGTGCTGCGCTTCAATGCTTGGATGCATGCATGAAACATTGTGCATCTTATCACTTAGAGGAAGGAGAAGTCGTAACAAGGTTTCT
1758	930b23a201342b90d1b0fe16333cf17a	OTU_1758	113	183	6	GTCAAGCCACCCAAGCAGGATGCACCCGAAAACATTATATCTAACCGGGGTAACCCGGAGGAAAATGTTGAAGGAGTGTTTTGTGAGGAGGACTAAGTCGTAACAAGGTAGTC
1759	9d9672abe5e6fa24b65799ddfa88ee39	OTU_1759	104	183	1	GTCGTTTCTTCCGACTGATACTCATTGTGAATTACGAGGAGGTGCAAGCCAAATCGTTGTAAATGCTGGGTATTGGAGGAAGAAAAAGTCGTAACAAGGTTATC
1760	b57df94f5faaaf5c68e72d71d6c4082b	OTU_1760	127	182	1	GTCGCTCCTACCGATTGGGTGATCCGGTGAATAATTCGGACTGCGGGAAGTGCAGTTCTGCACTTCACAGCAGGAAGTTTAGTGAACCTTATCACTTAGAGGAAGGAGAAGTCGTAACAAGGTTTCC
1761	c7a3e6478ebf01fc28bf24ebfb31fe6e	OTU_1761	131	182	1	CGTCGCACCTACCGATTGAATGGTCCGGTGAAGACTCGGGATTGTGGCTTGGCTCCTTTATTGGGGCTTGGCCGCGAGAACTTGTCTGAACCTTATCATTTAGAGGAAGGTGAAGTCGTAACAAGGTTTCC
1762	5e88fe329b19b2b6838ec535a56faf94	OTU_1762	136	182	1	GTCGCTACTACCGATTGAATGGTTTAGTGAGACCCTCGGATTCGTCCCAGCAGGGTGGGTCTCCACTAGGCTGGTGTGCGGAGAAGACGGTCGAACTTGATCATTTAGAGGAAGTAAAAGTCGTAACAAGGTTTCC
1763	b8c75632587c80534da3cfa29bde945f	OTU_1763	109	182	1	GTCACACCACGAAAATCGTCTACACCCAAAGTTATCTTAGCTGACCCGTAAGGGAGGCGGGTAATTAAGGTGTGGAGGGTAATTGGGGTGAAGTCGTAACAAGGTAGCT
1764	faaf17d57fd29b818a0c3f783d6fe419	OTU_1764	141	182	5	ATCACGCTCGGAGAGTTGTTAAAAATAGAAAATACTTATAGTTTAACACTAATGTTTCTAGTGTACATGTTTTTAATTGTGGGTTACCTATAACATTTAAGTTTTTAATAGTAATTTGAGTGAAGTTGACACAAGGTACTG
1765	ae96fc88e3c81191eeaed974e38e0669	OTU_1765	151	182	8	GTCACATCTTGGAAATAATTTTTTTTTGAAAGGTGAAAAATAGCTTTTTTTGTTTTTTTGATTAAAGTAATTTAGAAAGAAAAATTAAAAAAAATTATTTTTTTCATGAGGAAAAAAATTGTAACTATGATGAAGTCGTAACAAGGTAGTT
1766	d18020a43718923b25ae6449e5a572fd	OTU_1766	114	182	2	GTCACGTCTTGGGAATTGGTTTGGCTGAAATTGTGGGTGAAGGTATATTTTAAATATATTGGGATCTTTCTAAAGTAGAGTCGGTAACTGAGGCGAAGTCGTAACAAGGTAGTG
1767	ef5392f59ddfa5b5ecbd5309b8b40f48	OTU_1767	131	181	2	GTCGCACCTACCGATTGAATGGTCCGGTGAAACTTTCGGACGTCTGTAATGTCGCCTTAACGGGGACGCTGCGGAGGGAAGTTAGTTAAACCTTACCATTTAGAGGAAGGTGAAGTCGTAACAAGGTTTCC
1768	45892ef7c02e27f046e952cc5839faaf	OTU_1768	119	181	6	GTCGTTGCCTGTGATGGATTGTAAGTAGAGCTTTCTGGAGGTTATCCGGGGTTCCCGGTATAGCCGAAATTAAGCAATACTTGCAATCTAGAAGAGGCAAAAGTCGTAACAAGGTACTT
1769	c798c70bb1772abab6249a7246e90293	OTU_1769	108	181	7	GTCACATCACGAAAGTCGGTTGTACCGGAAGCCGGTGAGCCAACCCGCAAGGGAGGCAGCTGTCCATGGTGTGGTCGGCGATTGGGGTGAAGTCGTAACAAGGTAGCT
1770	a9975562183d2d979b01343e226a1c4b	OTU_1770	132	181	1	GTCGCTACTACCGATTGAATGGTTTAGCGAGATGCTCAGATCGAGCCTTGATCGTGCGAAAGCATGGCCGAGGCTTGAGAAGAAGTTCAAGCTTGATCATTTAGAGGAAGTAAAAGTCGTAACAAGGTTTTC
1771	7741dcd56288151956438f43471b578a	OTU_1771	108	181	4	GTCACACCATGGGAGTTGGGTCTACCCGACGGCCGTGCGCTAACCCTTTTGGGAGGCAGCGGACCACGGTAGGCTCAGCGACTGGGGTGAAGTCGTAACAAGGTAGCC
1772	db5ecf6df841bdb5a5f33d8f5db02cf3	OTU_1772	139	181	2	GTCGCTACTACCGATTGAATGGTTTAGTGAGGCCCTCGGACGGGTCCCGGGCCGGCCTTCGCGGCTGGCTGTCTTGGCGTGCCTGAAAGACGGTCGAACTTGATCATTTAGAGGAAGTAAAAGTCGTAACAAGGTTTCC
1773	6491756fe43b9d664da23ba617b0fc93	OTU_1773	131	181	1	GTCGCTACTACTGATTGGATGTTTAAGCGAGATCTTCGGACTGCTGGAGCCGGATCTTCGGTGATGGCTCTGAGAGGAAAGTAGGTCTAGCTTATGTGTCTAGAGGAAGTAAAAGTCGTAACAAGGTTTCC
1774	7559cf7bec5abf718bd869c432da7c5b	OTU_1774	136	180	7	GTCGCTCCTACCGATTGGGTGATCCGGTGAAGTCTAAGGACCGGTTCATCTGGCGAGTTCGCTTGCCCTGGATGTAACTGGGAATTGGACTAAACCTTATCATTTAGAGGAAGGAGAAGTCGTAACAAGGTTTTCG
1775	e9392c1e67ec55292a45c35d2c247149	OTU_1775	131	180	3	CGTCGCACCTACCGATTGAATGGTCCGGTGAAATTCTCGGACGTGAACGACAGATGTTCATTCGGATGTCGTTTGTGAAAGTTAATTAAACCTTACCATTTAGAGGAAGGTGAAGTCGTAACAAGGTTTCC
1776	6eab5a3341678bd1241b1aa8444fed40	OTU_1776	124	180	2	GTCGCTCCTACCGATTGGATGATCCGGTGAATACTTCGGAGTGCCCTTGTGTCCTCGGACGCTTGGGTGCAAAGTTGAGTGAACCTTATCATCTAGAGGAAGGAGAAGTCGTAACAAGGTTTCC
1777	3e46409dbaafbbf44b25fcbfaf1b75c7	OTU_1777	131	180	6	CGTCGCACCTACCGATTGAATGGTCCGGTGAAGCCTCGGGACCATGGTTAGTTTGCTTCATTGCAGGTTGACTGTGGGAACTTGTCTAAACCTTATCATTTAGAGGAAGGTGAAGTCGTAACAAGGTTTCC
1778	b478523817133fde65204dd9221861ec	OTU_1778	161	180	1	GTCGCTCCTACCGATGAATGAATCGGTGAGAATTTGGGAGAGCTGAAGAGAGGATGTGGGTTGGAAACGGCCTAGATCTGAAACGTGTCGAGAGATGCGGGAGCTACAAACTTGTTCAAACCTGTTCATTTAGAGGAAGGAGAAGTCGTAACAAGGTATTC
1779	72f5eb79acf81621f955c6582ce2470a	OTU_1779	136	179	1	GTCGCTACTACCGATTGAATGGTTTAGTGAGAATTTTGGACTGGAGCTTTCCTGTTCAGCAATGAACGAGAGAGAGTCCGGGAAGTCATTCTAACTGTATCATTTAGAGGAAGTAAGAGTCGTAACAAGGTTTCCG
1780	c68ad7eca522e54c7695bcb836f0c9fd	OTU_1780	131	179	9	CCGTCGCTCCTACCGATTGAGTGATCCGGTGAATAATTCGGACCGCCGCGGTGCTCAGTTCCTGCGCGCTGCAGTGGAAAGTTTAGTGAACCTTATCACTTAGAGGAAGGAGAAGTCGTAACAAGGTTTCC
1781	9d64f0bfbac5e486f32fb3d8382d1995	OTU_1781	131	179	11	GTCGCTACTACCGATTGAACGGTTTAGTGAGATCTCGGGATTGGCCCGCCGTGACTGGCGACAGTCTGGCGGGCTGAGAACTTGCCCAAACTTGATCGTTTAGAGGAAGTAAAAGTCGTAACAAGGTTTCC
1782	00057383dd0d0c49d1a9aff9a5cd14e9	OTU_1782	109	179	7	GTCACATTCTGGGAGTTGATTTTATTTGAAGCTAATGTCCTAACCTTTATAAGGAGGGAGTTTGTAAGAATGAAAGCGATGACTGGAATGAAGTCGTAACAAGGTAGCC
1783	8fe27ecd0de192348a2d87d8924d17c3	OTU_1783	110	179	1	GTCGCTCTTACCAATGAACTATGCTGCAAGTTTGAGGGACTAGCTTTTTATGCTGGAAACTTAAACGAACAGTGTGGTTTAAAGGAAAGAGAAGTCGTAACAAGGCATCT
1784	b13ca862fd4ca9d9a9ea758e6178e9fa	OTU_1784	106	179	2	GTCACACCATGGGAGTTGGGTCTACCCGACGGCCGTGCGCTAACCTTTTGGGGGCAGCGGACCACGGTAGGCTCAGCGACTGGGGTGAAGTCGTAACAAGGTAGCC
1785	f549d9b4cff384ec55bc009d6c0afbfa	OTU_1785	137	178	1	GTCGCTACTACCGATTGAATGGTTTAGTGAGGCCTCCGGATTGGCACTGTCAGATGAGCTTCGGCTTATCCGACGGACGTCAAGAAGCTGGTCAAACTTGATCATTTAGAGGAAGTAAAAGTCGTAACAAGGTTTCC
1786	e4e148926f9ecc66f578e3b16cdc327d	OTU_1786	108	178	1	GTCACACCATGGGAGTTGGTTTCACCCGAAGGCAGTGCTCTAACCCGCAAGGGAGGAAGCTGACCACGGTGGGATCAGCGACTGGGGTGAAGTCGTAACAAGGTAGCC
1787	2fb3c0d2097aafd8c5e998c3fc4e0a5c	OTU_1787	133	178	7	GTCGCACCTACCGATTGGATGACTCGGTGAGAAATTGGGACTGTGATATTGTCCATCTTAATTGATGGCGATAGCGCGGGAACTTTTTCAAACCTCGCCATCTAGAGGAAGGTGAAGTCGTAACAAGGTTTCC
1788	9c98f354b6aeb7b0ef02da34bab03cf7	OTU_1788	107	178	5	GTCAAACCATGAAAGTTGTCTGTGCCCGAAGTTGCTTTATCCAACCGTAAGGAGGAGAGCACCTAAGGTACGGGTGATGATTGGGGTTAAGTCGTAACAAGGTAGCT
1789	080965fc770deb2179b5f5f23555bde7	OTU_1789	131	178	4	CGTCGCTCCTACCGATTGAGTGATCCGGTGAATAATTTGGACCGATGCTCTACTTGGTTTTCCAGGTTAAGCGTTGGGAAATCTAGTGAACCTTATCACTTAGAGGAAGGAGAAGTCGTAACAAGGTTTCC
1790	8e1e8d2dc2383914871b99eb3625a22e	OTU_1790	105	178	8	GTCGTTTCTTCCGACTGATACTCATTGTGAGTTGCAAGGATTCTATTTGAAAAATTGCTGCGAATGCTTTGTATTGGAGGAAGAAAAAGTCGTAACAAGGTTATC
1791	1c1bbb58c86d789d3c8b94609a78c9c9	OTU_1791	107	177	3	GTCACACCACGAAAGTTTTTTGTGCCCGAAGCTGTTTTAGCTAACCTTTTGGAGGCGAACAGCGACGGTATGGGAGATGATTGGGGTGAAGTCGTAACAAGGTAGCT
1792	3a65fbe48213487f57c315f4308ab956	OTU_1792	127	177	5	GTCGCTCCTACCGATTGAGTGATCCGGTGAATAATTCGGACTGCGGTTTTGTAACTGTGTTGCATTACTGTGGGAAGTTTAGTGAACCTTATCACTTAGAGGAAGGAGAAGTCGTAACAAGGTTTCC
1793	f61d769828beab4a68109230291dc9f9	OTU_1793	136	177	5	GTCGCTACTACCGATTGAACGGTTTAGTGAGATCCTCGGATGAGTCCCGTTTTGACTGGCAACAGTTGAGGCGAGGTGCTGAGAAGACGATCGAACTTGATCATTTAGAGGAAGTAAAAGTCGTAACAAGGTTTCC
1794	019a9d8d9d590e18af12f0e1d3556d77	OTU_1794	131	177	1	CCGTCGCTCCTACCGATTGAGTAATCCGGTGAATGTTGTGGACTTGTACACAGCCCTACTTAAGAGCTGATGTTGGGGAAGCTCCGTGAGCCTTATTACTTAGAGGAAGGAGAAGTCGTAACAAGGTTTCC
1795	288073be407368fd46408b8cd502011c	OTU_1795	136	176	2	GTCGCTACTACCGATTGAATGTTCTGGTGAAATCATTAGAGTGGTACCGATGGAGTGGTCTCCACTCCATGGGAAACTGCAAAGACGCTTAAACCTGAGCATTTAGAGGAAGTAAAAGTCGTAACAAGGTTTCCGT
1796	1cc0e5c3b18e6704f4e9cf1bdfca5b77	OTU_1796	131	176	2	CGTCGCACCTACCGATTGAGTGTTCCGGTGAAGCCTCGGGATTGTAGTTGGCTTCCTTTATTGGATGCTGGCCGCGAGAACTTGTCTAAACCTTATCACTTAGAGGAAGGTGAAGTCGTAACAAGGTTTCC
1797	18aa15cb58cb0a3617c887ff3d5fb534	OTU_1797	127	176	4	GTCGCTCCTACCGATTGAATGTTCCGGTGAATACTTTGGACTGCGAACACGGTAGTTTCTACTGTGTTTGTGGAAAGTTGAATAAACCTTAACATTTAGAGGAAGGAGAAGTCGTAACAAGGTTTCC
1798	18be93e4ce4048dbde3186126dcfe6fe	OTU_1798	131	176	2	CGTCGCACCTACCGATTGAATGATTCGGTGAAATTCTCGGACTGTGCACTTTAATCCTTCGGGATTTTTGAGCGTAGGAAGTTAAGTAAACCTCATCATTTAGAGGAAGGTGAAGTCGTAACAAGGTTTCC
1799	0864723017ec7dbf2598718eeedbdcbb	OTU_1799	106	176	4	GTCAAGCCACGAAAGCGGGGGGCGCCTAACGTCGTTGAGCTAACCTTCGGGAGGCAGACGCCCAGGGCGAACTCCGTGATTGGGACTAAGTCGTAACAAGGTAGCC
1800	78e3e0a0395391e87252e1c5a25b13ca	OTU_1800	136	176	6	GTCGCTCCTACCGATTGAACGATGCGATGAAATTTTCGGAGAGGGACTTTGCGACCAGTTCGCTGGACAAAAAGTCATTCAAAGTGATTTAAATCTCATCGTTTAGAGGAAGGAGAAGTCGTAACAAGGTTTCCGT
1801	9fd0b6c11efd91c0bf20fda47ba2af2e	OTU_1801	131	176	7	CGTCGCACCAACCGATTGGATGTTTTGTTGAAATATGTGGATGTTTGTTGAGTGGATTGATTTCTATTTGATAGATAGAAACGTATTAAAACTGAATATCTAGAGGATGGTGAAGTCGTAACAAGGTTTCC
1802	047c8953f333c6e2e965d412fa53e2bc	OTU_1802	122	176	3	GTCGCTCCTACCAATAGAGTGATTTGGCTAACTGCTCAGATCCGAGCCAACATCTTTGCTGGTCAAGAAACGATTGGTAATCCATGATACTCAGAGGAAGGAGAAGTCGTAACAAGGTTTCT
1803	8a124ae0567358ccee80fc87863f79d7	OTU_1803	126	176	3	ATCACGCCCGAAAAGTTGTTACGGATTGAAATTATCTATTGTAAATAATTTTGTTTTCTAATAATTATTTATTTATAGTAATTAGATACGAAAGAGTAATTTGGGCGAAGTTGAAACAAGGTAATG
1804	802bab68e872e036a72f191eedae1911	OTU_1804	136	176	1	GTCGCTACTACCGATTGAATGGTTTAGTGAGATCCTCGGATCGGCCTCGACGGGAGAGGAAACTTTTCTGTCGTTGTGCTGAGAAGACGATCAAACTTGATCATTTAGAGGAAGTAAAAGTCGTAACAAGGTTTCC
1805	10d102844a06fb6c9377fb7d9599c73f	OTU_1805	108	175	1	GTCACATCACGAAAGTTTGCTGCTCTCGAAGTCGCTGGGCTAACCCGCAAGGGAGGCAGGTGCCGACGGAGTGGCAGGCGATTGGGGTGAAGTCGTAACAAGGTAGCT
1806	785b640ee7fc50d1d0231e3209265f1b	OTU_1806	108	175	1	GTCACATCACGAAAGTCGGCTGCACTAGAAGTCGCTGGGCTAACCCTTCGGGGAGGCAGGTGCCGAAAGTGTGGTCGGCAATTGGGGTGAAGTCGTAACAAGGTAGCT
1807	160ac7b0085a25ba434015167bf0d375	OTU_1807	122	175	1	GTCGCTCCTACCGATTGAGTGATCCGGTGAATAATTCGGACTGCGATGTATCAGCTGATACGCCGCGGGAAGTTTAGTGAACCTTATCACTTAGAGGAAGGAGAAGTCGTAACAAGGTTTCC
1808	898d6f42e7430747a60dbea0ac8676db	OTU_1808	131	175	2	CGTCGCTCCTACCGATTGGATGTGCTGGTGAAAAGTTCGGATTGGGAGTGGGAGACGGCAACGTATCCTGCTTCCGAGAAAATCTTTAAACCCTCCCATCTAGAGGAAGGAGAAGTCGTAACAAGGTTTCC
1809	97d7930164141410e99b08975788b47e	OTU_1809	141	175	1	GTCGCTACTACCGATCGAATGGTTTAGTGAGGCCCTTGGAAGTTCCCCGGGCCGGCAGGCCTCTGCCGGTCGTCTGGTTGCGTGACCAAAGAGGGTCGAATTTGATCATTTAGAGGAAGTAAAAGTCGTAACAAGGTTTCC
1810	4995109007a3bd28a96d8361830fed81	OTU_1810	141	175	3	GTCGCACCTACCGATTGAATTTCTAGGTGAAAACTTGGGACGTTGTTTTGCCGAGAAATCTTCGGGTTTCTATGTTGTATTACGATGAAACTTGTTTAAACCTTGCAATTTAGAGGAAGGTGAAGTCGTAACAAGGTTTCC
1811	3c43c3aacc6fb353bab509f5c844ec40	OTU_1811	132	175	1	GTCGCTACTACCGATTGAACGTTTTAGTGAGGTATTTGGACTGGGCCTTGGGAGGTTTCCGCCTCCCTTGTTGCTCGGAAAGACTCCCAAACTTGAGCGTTTAGAGGAAGTAAAAGTCGTAACAAGGTTTCC
1812	fe2ca34584b6970e07645a6ae7c52951	OTU_1812	131	175	3	CGTCGCTACTACCGATTGAACGTTTTAGTGAGGTATTTGGATCGGCGCTCTTGAGGTTCACGCCTCGATTGTGCTGAAAAGACTCCCAAACTTGAGCGTTTAGAGGAAGTAAAAGTCGTAACAAGGTTTCC
1813	98ed92b1b9292107bdef3e758ecdb63f	OTU_1813	136	175	3	GTCGCTACTACCGATTGAACGTTTTAGTGAGGTATTTGGACTGAACATTCGGAGGTTCTTTGATCCTCCGTTGCTGTTCGGGAAGACTCCCAAACTTGAGCGTTTAGAGGAAGTAAAAGTCGTAACAAGGTTTCCG
1814	0aa4ac697b0e7c83f1f1dbfbb8c219d8	OTU_1814	115	175	1	GTCGCTCCTACCGATTGGATATTCCGGTGAAAAATTTGGATCGTTGAAACACATTCTTTGAGAAATTTTTTAAACCTTAATATCTAGAGGAAGGAGAAGTCGTAACAAGGTTTCC
1815	78d006c5d9f0e5649c72020fbeec0914	OTU_1815	122	175	5	GTCGCTCCTACCGATTGGGTAATTCGGTGAACAATCCGGACCGTCAAGGAACGTTAGTTCTGAGGTGGAAAGTTTCGTGGACCTCATTATCTAGAGGAAGGAGAAGTCGTAACAAGGTTTCC
1816	0a3e38fc5c6221a58761acaf387b8772	OTU_1816	145	175	5	GTCACACTATGAAAGTGAATCGTATTCAAAGAAATTGTTCTTTTTTTTACCTATACCACTTTTCCATTTATTGATGTGATGTCGTACTTAAAAGATGTTTTTACAATTCTGTTTATGATTGTAGTGAAGTCGTAACAAGGTAGCT
1817	b61a7b36be9517d26828b362d8e147e1	OTU_1817	123	175	3	GTCGCTCCTACCGATTTCGAGTGGTCCGGTGAACCCTTTGGACCGGAGCCCGTTTCTTGCGGGCACTGGAAAGTCGAGTAAACCACATCACTTAGAGGAAGGAAAAGTCGTAACAAGGTTTCC
1818	04476eeaf10e479c05f88094b4a50794	OTU_1818	106	174	1	GTCACACCATGGGAGTTGGCTTTACCCGAAGCCGGTGCGCTAACCGCAAGGAGGCAGCCGACCACGGTAAGGTCCGCGACTGGGGTGAAGTCGTAACAAGGTAGCC
1819	1887ece80eadcbb63e55eebabb3873db	OTU_1819	127	174	2	GTCGCTCCTACCGATTGGATGATCCGGTGAGCAGTCAGGACCGCAGCAATAGTCTTTCGGGACTTTGCCGCAGAAATCTCTGCAAACCTTATCATCTAGAGGAAGGAGAAGTCGTAACAAGGTTTCC
1820	414c25e44c54d8db2f9e3d4a042fc827	OTU_1820	128	174	2	GTCGCACCTACCGATTGAATGGTCCGGTGAAGCCTCGGGATTGTGACTTTTTGCTTTATTGCGAATGGTTGCGAGAACTTGTCTAAACCTTATCATTTAGAGGAAGGTGAAGTCGTAACAAGGTTTCC
1821	72fda5ec3195063fbfdbac5468c95b96	OTU_1821	109	174	4	GTCGCTCTTTCCGATTAATACGTTGAATATAAAGTTGACGACATAATTAGGAAGTTGATGCCTTTATGTTGTAGTGTGGAGAGGAAGGAAAAGTCGTAACATGGTTTCC
1822	85847a6bcdf60547452481195fd28e4a	OTU_1822	136	174	3	GTCGCTACTACCGATTGGATGGCTTAGTGAGACCTCTGGATCTCTGCCGGCGCGGTCCTCACGGGTCGCGTTGGATGGGGAGAAGTTGTTCAAACTGAGTCTTCTAGAGGAAGTAAAAGTCGTAACAAGGTTTCCG
1823	5f19a0c13e23b167c5c51df25a28ff4f	OTU_1823	133	174	1	GTCGCTACTACCGATTGAATGGTTTAGCGAGAACCTCGGATTGAACCCATGCCGTGCGCGAGCATGGTTGCGGGTTTGAAAAGAAGTTCAAGCTTGATCATTTAGAGGAAGTAAAAGTCGTAACAAGGTTTTC
1824	1312636fc0b57898a30e90ec50f6d567	OTU_1824	136	173	6	GTCGCTCCTACCGATTGAATGATCCGGTGAGGCCCCCGGACTGGAGCAACTGGAGTGGTTCGCCATCCCGGATGCCTCGGGACGCTGTCCAAACCTTATCATTTAGAGGAAGGAGAAGTCGTAACAAGGTTTCCGT
1825	ecc4ea76c7fd32a27bdb774becf7cfd4	OTU_1825	132	173	1	GTCGCTCCTACCGATTGAATGGTCCGGTGAAGCGTTCGGACCGCTTCCTTTGGACGGGCAACCGTCTGTTGGTCGTGGGAAGTTCGTTAAACCTTATCATTTAGAGGAAGGAGAAGTCGTAACAAGGTTTCC
1826	292b65648e17dc4665ad0b936fb07963	OTU_1826	105	173	2	GTCAAGCCACGAAAGTGGGGTGCGCCCGAAGTCGCCAAGCCAACCTCGTGAGGCAAGCGCCGAAGGTGAACTCCGCGATTGGGACTAAGTCGTAACAAGGTAGCC
1827	4db7fae67275263bb8affd18a002d2d1	OTU_1827	131	173	1	CGTCGCACCTACCGATTGAATCATTCGGTGAGGATTCCGGATTCCGTTGCTTACGCTTCACGGCGTTTTTGACGAAAGAAGTTATCCAAACCTCATGATTTAGAGGAAGGTGAAGTCGTAACAAGGTTTCC
1828	27995460e10bff76c46310cbcf816c77	OTU_1828	131	173	11	CCGTCGCTCCTACCGATTGGATGATTCGGTAAGCTCTCGGGATTGATTGACGAACCGCATGTCGGATTGGATTTTGACAACTTGATCAAACCTAATCATCTAGAGGAAGGAGAAGTCGTAACAAGGTTTCC
1829	080352daa4a154f0b23db99fed8c1802	OTU_1829	131	172	2	CCGTCGCACCTACCGATTGAATGGTCCGGTGAAATCTTCGGATTGCGGCTTGGCCCTTTTTTTGGGACGAGTTGCCAAAAGTTGATTAAACCTTGCCATTTAGAGGAAGGTGAAGTCGTAACAAGGTTTCC
1830	d25fe843c76f902971683e4b519b6c80	OTU_1830	108	172	8	GTCACATCACGAAAGTTGGCTGTACCGGAAGCCGCTGGGCTAACCCGCAAGGGAGGCAGGTGTCCATGGTATGGTTAGCGATTGGGGTGAAGTCGTAACAAGGTAGCT
1831	e6e4d47c5bf68e0ab2c1796c33d976ec	OTU_1831	132	172	1	GTCGCACCTACCGATTGAATGACTAGGTGAAAAGTCGGGACTGTGGTTTCGCTTGCTTCATTGCAAACTTAACTGTGGGAACTTCTTTTAACCTATTTATTTAGAGGAAGGTGAAGTCGTAACAAGGTTTCC
1832	327ee900a4375aadf8830c0ad8a341b6	OTU_1832	128	172	1	GTCGCATCTATCGATTAGGCTGTATCATGAGTTAGGCGGAGGTGATGTGGGGGAAGTTCTTCTCTCACATTTCCAAAGCTTTGCAAATGGTATTGCCCAGAGACAGATAAAGTCGTAACACGGCAACT
1833	7afb8f45e10c605c8020184efefa9b01	OTU_1833	138	172	2	ATCACGCTATGGAAGTTAAGTCGGTTGGATGGTTGTGGCCTCTGTTTAAGCAGCTCTAAAAGCTTGGGTTTTTAAGCTCCTTAATTATGTAACCGAAAAACGGTTTGGTAACTGGAGTGAAGTTGTAACAAGGTACTG
1834	aeaa83906fca9924ea3ebef1ee5d2c57	OTU_1834	136	171	3	GTCGCTACTACCGATTGAATGGTTCAGTGAGATAATCGGACAGGTAACTTGGTAACTGTCAAAAGTTACCGAGCATATTTGGAAGACGATCAAACTTAGTCATTTAGAGGAAGTAAAAGTCGTAACAAGGTTTCCG
1835	6364ab57bd8eda2d0b77e1f8aaedea2d	OTU_1835	131	171	3	CGTCGCTACTACCGATTGAATGGTTTAGTGAGATCTCGGGATTGGCGACGCCATGCCGCGAGGCACGGCGCCGCCGAGAACTTGCTCAAACTTGATCATTTAGAGGAAGTAAAAGTCGTAACAAGGTTTCC
1836	36425db187e36d052a8a4a89f8f4ae5e	OTU_1836	132	171	2	GTCGCACCTACCGATTGAATGGTCCGGTGAAATTTTCGGACTGTTGCAATGTCGCCTTAATTGGAGACGCTGCAGTGGGAAGTTAATTAAACCTTACCATTTAGAGGAAGGTGAAGTCGTAACAAGGTTTCC
1837	9b94da47bc2e122ff1fad8e8cb00900c	OTU_1837	128	171	4	GTCGCACCTACCGATTGAATGGTCCGGTGAAAACCTCGGATTTTGGTAAATTTCAGCAATGAGATTTTCTAGAAGAAGTCGTTTAAACCTTACCATTTAGAGGAAGGTGAAGTCGTAACAAGGTTTCC
1838	ddc4b38309e7c5bbe54f834fad1805e2	OTU_1838	136	171	2	GTCGCTACTACCGATTGAATGGTTTAGTGAGATCTCCGGATTGGCACCATCGCGGCTTCGCGGCTGTGACGGAATGCCGAAAAGTTGATCAAACTTGATCATTTAGAGGAAGTAAAAGTCGTAACAAGGTTTCCGT
1839	a7f81116140378f5c9f91bdc03906a55	OTU_1839	132	170	3	GTCGCTACTACCGATTGAATGGCTTAGTGAGGCCTTCGGATCGGCGTCTGGGAGCTGGCAACGGCACCCGGATGCTGAGAAGTTGGACGAACTTGGTCATTTAGAGGAAGTAAAAGTCGTAACAAGGTTTTC
1840	dd6b9fbcc249678118a6f84db6dc520d	OTU_1840	117	170	1	GTCGTTGTTTCCGATGATGGTGCAATACAGGTGATCGGATAAATGGGTGTCTCACCCGGTTTAGAAGTTCACCGATATTTCTTCAATAGAGGAAGCAAAAGTCGTAACAAGGTAGCT
1841	a38c4aea498fa6e5386978f8987d2cf2	OTU_1841	132	170	2	GTCGCTCCTACCGATTGAATGATCCGGTGAAATCTCAGGACTGGTGATTGTGGTTGGTTCGCCAACGATAGTCACCGGGAATTTGCTTAAACCTTATCATTTAGAGGAAGGAGAAGTCGTAACAAGGTTTCC
1842	e9e887662c805b0b3b1296f7010fc604	OTU_1842	128	170	2	GTCGCACCTACCGATTGGATGGTCCGGTGAAGCCTCGGGATTGTGGCGGTTGCCTTTATTGGTGGCCGCCGCGAGAACTTGTCTAAACCTTATCATCTAGAGGAAGGTGAAGTCGTAACAAGGTTTCC
1843	6f52c200036bed4940637520c07b1827	OTU_1843	120	170	1	GTCGCTGCTACCGATTGAGTGATCCGGTAAACCTTCTGGACTGCGTGAGCCTTGAGTTCGTTGCGGGAAGTTAAGTAAACCATATCACTTAGAGGAAGCAGAAGTCGTAACAAGGTATCT
1844	86125b52a67bb157c36a266429744d69	OTU_1844	106	170	6	GTCGTTTCTTCCGACTGAGAGAAATTGTGAGTTGCAAGGATTTCGACTGAAAGAATTGCTGCTAATGATCTCTCTTGGAGGAAGAAAAAGTCGTAACAAGGTTATC
1845	a53ed16046ff5eb50f05d783b14c4d8f	OTU_1845	136	170	4	GTCGCTACTACCGATTGGATGGTTTAGTGAGGTCCTCGGATCGGCCCCGCCGGGGTCGGTCACGGTCCTGGCGGAGCGCCGAGAAGACGATCGAACTTGACTATCTAGAGGAAGTAAAAGTCGTAACAAGGTTTCC
1846	02d98de2e90a730671be190a846fb416	OTU_1846	131	170	2	CGTCGCTCCTACCGATTGAGTGGTCCGGTGAATAATTTGGACCGGCGCCTTATTCGGTTCTCCGAGTTCGGTGCTGGGAAATCTAGTGAACCTTATCACTTAGAGGAAGGAGAAGTCGTAACAAGGTTTCC
1847	c084c98a4791a3be57d8b06a3c0cb6b2	OTU_1847	131	170	3	CCGTCGCTCCTACCGATTGAGTGATCCGGTGAATAATTTGGACTGATAAGATAAGCCTTGAGGTTTTGTCTTGTTGGGAAGTTTCGTAAACCTTATCACTTAGAGGAAGGAGAAGTCGTAACAAGGTTTCC
1848	d58c9bf64a909521f3366607007f4bf8	OTU_1848	131	169	2	CGTCGCTACTACCGATTGAGTGTTTCAGTGGGGTCCTCGGATTGCCTTCCTGGCGGTTAACCCTGCCTCGTTGGCGAAAAGACGACCAAACTGTAGCACTTAGAGGAAGTAAAAGTCGTAACAAGGTTTCC
1849	211bf98b854e2a4108ed192969fffd06	OTU_1849	124	169	2	GTCGCTCCTACCGATTGGATGATCCGGTGAATACTTCGGATCGCCCTCGCGTCTCCGGAAGCTTGGGTGAAAAGTTGAGTGAACCTTATCATCTAGAGGAAGGAGAAGTCGTAACAAGGTTTCC
1850	f4171f1a8e917f50e4f830d860b07a7d	OTU_1850	106	169	1	GTCACACCACGAAAGCTGGTTGAACCAGAAGTCCGTGACCCAACCTTCGGGAGGGAGCGGCCCAAGGTTTGACTGGTGATTGGGGTGAAGTCGTAACAAGGTAGCC
1851	7cb69bca8705fc2aa58fd10dbe8d31fc	OTU_1851	107	169	4	GTCACACCATGGGAGTTGGTTCTACCCGAAGCTGGTGCGCTAACCTTTTAGGAGGCAGCCAACCACGGTAGGATTAGCGACTGGGGTGAAGTCGTAACAAGGTAGCC
1852	3f6842755c620d14883b8e916d4be9ea	OTU_1852	132	169	5	GTCGCTACTACCGATTGAATGGTTTAGTGAGGTCTCGGGATCAGCCTTTGGCTTCGGGCAACCGAAGCCTCGGGCAGAGAACTTGAACAAACTTGATCATTTAGAGGAAGTAAAAGTCGTAACAAGGTTTCC
1853	a145734e16fb95481570319601c42f85	OTU_1853	108	169	3	GTCACATCACGAAAGTCGGCTGTACCGGAAGCCGGTGGGCCAACCCTTCGGGGGGGCAGCTGTCGATGGTATGGTCGGCGATTGGGGTGAAGTCGTAACAAGGTAGCT
1854	d112ee1b73964871bed3d7268356e592	OTU_1854	158	169	2	GTCATGCCATGGAAATTGGTTTCAATCGAAGCAGGTGGCTATGAATATATGGTTTAGAAAAAATGAGTTGAGTAAACAGCTAGAAAAATTAGATTAGATATTTGATAGTTTTGTGAGTTTGGAATTAAGGACTGGGGTAAAGTCGTAACAAGGTAGTC
1855	75c7f691e12b177ecc88e0934e9c3d97	OTU_1855	145	169	4	GTCGCTCCTACCGATGTTTGGTCCGGTGAAATCTTAAGATTTGCGGCATACACTTGTTTTTGCTCTTTTGTGAAAATGAGTTTGCTGTGGAGAATTTGAGTAAACCTTGCCAAATAGAGGAAGGAGAAGTCGTAACAAGGTATTC
1856	cb1e036c7391094eca7fd3d109b3b02a	OTU_1856	131	169	4	CGTCGCACCTACCGATTGAATGGTCCGGTGAAGCCTCGGGATTGTGGCGAGTCTCCTTTATTGGGGGTTTGTCGCGAGAACTTGTCTAAACCTTATCATTTAGAGGAAGGTGAAGTCGTAACAAGGTTTCC
1857	d7030acddc992dfffee46f5328c26b40	OTU_1857	106	169	7	GTCACACCATGGGAGTTTGTTGCACCAGAAGTGGATAGTCTAACCTTCGGGAGGACGTTCACCACGGTGTGGCCGATGACTGGGGTGAAGTCGTAACAAGGTAGCC
1858	f2f2cadd95dd162852d8eb0262d319be	OTU_1858	131	169	7	CCGTCGCTCCTACCGATTGGATGATTTGGTGAGCTCTATGGATCGCCGTTCCTCTCCGCTTGCGGATGGTTTGGTGAGAAACTGATCGAACCCAATTATCTAGAGGAAGGAGAAGTCGTAACAAGGTTTCC
1859	7c79f9206f27f397a01ec98bc71ac500	OTU_1859	131	169	2	CCGTCGCTCCTACCGATTGAGTGATCCGGTGAATAATTTGGACTGCAGTAATGTTTGGATCCCGAATATTGCAGCGGAAAGTTTAGTGAACCCTATCACTTAGAGGAAGGAGAAGTCGTAACAAGGTTTCC
1860	e4c6715c2ecaabc054635fa9066605ad	OTU_1860	136	169	1	GTCGCACCTACCGATTGAATGGTCCGGTGAAATCTTTGGACCGCGTCTTTGTTTTACTTTCGGGTAAAACGTTGATACGGGAAGAGGATTAAACCTTATCATTTAGAGGAAGGTGAAGTCGTAACAAGGTTTCCGT
1861	68d4d616794a0386445bbf12d45a5727	OTU_1861	132	168	4	GTCGCTACTACCGATTGAATGGTTTAGTGAGTCCTCGGGATCAGTCCTCTGAGCGTGGCAACACGCACTCTGGACAGAGAACTTGGTCAAACTTGATCATTTAGAGGAAGTAAAAGTCGTAACAAGGTTTCC
1862	e49e6293c932a97a67e9b4a5a0e07715	OTU_1862	132	168	2	GTCGCTACTACCGATTGAATGGCTTAGTGAACCGTTGGGATTGACGCCTGGGAGCTGGCAACAGCATCTGGATGTTGAAAACTTCTGTAAACTTGGTCATTTAGAGGAAGTAAAAGTCGTAACAAGGTAACC
1863	88dc20a668cf737711135a00b72adcba	OTU_1863	141	168	1	GTCGCTCCTACCGATTGAATGATCCGGTGAAAACTCAGGACTGGCGATGGCTACTGCTTTTTTGTGGTGGCTATTGTTTTTTTCCGGGAATTTGTTTGAACCTTATCATTTAGAGGAAGGAGAAGTCGTAACAAGGTTTCC
1864	9cecc40865fe5390d1e0a2338846c521	OTU_1864	108	168	2	GTCACATCACGAAAGTGGGCTGTACTAGAAGCCGCTGGGCTAACCCGCAAGGGAGGCAGGCGTCGACGGTGTGGCTCATGATTGGGGTGAAGTCGTAACAAGGTAGCT
1865	39a50d27a52086f8459e3f1e63ce77df	OTU_1865	131	168	6	CGTCGCACCTACCGATTGAATGGTCCGGTGAGGACTCGGGATTGTGATTTTGCCCCTTCATTGGGACTTTGTCGCGAGAACTTGTCCGAACCTTATCATTTAGAGGAAGGTGAAGTCGTAACAAGGTTTCC
1866	0a385490295740aabf308909940f030f	OTU_1866	131	168	5	CCGTCGCTCCTACCGATTGAGTGGTCCGGTGAATAACTCGGATATTGTCTGTTTAACTTGAGTTAGTACAGAGAGTAGAAGTTTAGTGAACCTTATCACTTAGAGGAAGGAGAAGTCGTAACAAGGTTTCC
1867	804e0b118ecd0f77edf4a3a5ba5dec83	OTU_1867	138	168	7	GTCGCTACTACCGATCGGATGGTTTAGTGAGACCCTCGGACTGACCCCGACGGGGCGGGCAACCGCCCCGGCGCGCGTCGTCGGGAAGAAGGTCGAACTTGACTATCTAGAGGAAGTAAAAGTCGTAACAAGGTTTCC
1868	6bb861260a673901fb6632c9d60be8f4	OTU_1868	106	167	5	GTCAAGCCACGAAAGTGGGGGGCATCCGAAGTCGCTGAGGTAACCGCAAGGAGCCAGGCGCCGAAGATGAACTCTGCAATTGGGACTAAGTCGTAACAAGGTTTCC
1869	aa7efb844da1d9044ef5c6d9a1a0f763	OTU_1869	223	167	1	GTCGCACCTACCGATTGAGCGTTCCGGTGAGTTGTCGGGATTGTAGTTGGATCCTTTATTGGATCCTGCCGCGAGAACCTCCACAAACCTTATCGCTTAGAGGAAGGTGAAGTCGTAACAAGGTTTCCGTAGGTAAGAATAAATATGATGTTCCCGATGTACCCATGTCTCTTTTGATCTGATCATGATCTTACACCCTTATCTTTCTCTCTATCTGTCTATT
1870	663470cb7a3300ef04db71d019f9874c	OTU_1870	127	167	2	GTCGCTCCTACCGATTGGATGATCCGGTGAGCTATTCGGACCTTCGCTTTGTCGATTTTCGGCTTGGTGAGGGAAAGTCTCGCGAACCTTATCATCTAGAGGAAGGAGAAGTCGTAACAAGGTTTCC
1871	374931271c6ca5b55531921f8f544b21	OTU_1871	126	167	4	GTCGCTCCTACCGATTGAGTGATCCGGTGAATACTTGGGACCGCGTCGAATCCAATTTTGGTTTCGATGTGGAAACTTGAGTGAACCTTATCACTTAGAGGAAGGAGAAGTCGTAACAAGGTTTCC
1872	dac294617dfc85ef64b74dd3a32043aa	OTU_1872	125	167	4	GTCGCTCCTACCGATTGAATGATCCGGTGAGCAGTCCGGACCGCAGCTAGGCTTTCGAGTACTAGCAGCGGAAAGCTCTGCAAACCTTATCATTTAGAGGAAGGAGAAGTCGTAACAAGGTTTCC
1873	f57f49bf60a61f3430e49dc11f8bd4ab	OTU_1873	136	167	5	GTCGCTACTACCGATGGATTATTTAGTGAGGTCTTTGAAGGTGAACATTTGCTAGTCCTTCCCGGATTACATTTGAATCGCTGAAGTTGACCGAACTTGATGATTTAGAGGAAGTAAAAGTCGTAACAAGGTTTCC
1874	870c714dcbd9304117d5d2be92540bff	OTU_1874	131	167	4	GTCGCACCTACCGATTGAGAGCATAGGTGAAAACTCAGGATCGTCGATGATGCACCCTCGGGTAGCGTCATTGGTGAGAATTTGTTTAAACCTCCGTTCTTAGAGGAAGGTGAAGTCGTAACAAGGTTTCC
1875	1312849dd387dfad50803ac22bb21254	OTU_1875	131	167	1	CCGTCGCTCCTACCGATTGAGTGATCCGGTGAATAATTTGGACTGATGTAGTGCTCAGCTTCTGGACGTTGCATCGGAAAGTTTCATGAACCTTATCACTTAGAGGAAGGAGAAGTCGTAACAAGGTTTCC
1876	6c395a58ffef4ee8a40efdc8a9e51740	OTU_1876	132	166	2	GTCGCTACTACCGATTGAATGGTTTAGTGAGGTCTCGAGATTGACGCTTTGAGGTGCTTCGGCTAATCTTTGAGTTGAGAACTTGCCCAAACTTGATCATTTAGAGGAAGTAAAAGTCGTAACAAGGTTTCC
1877	f25faef61e49d1d1f7d5937fc4fa0146	OTU_1877	128	166	1	GTCGCACCTACCGATTGAACAGTCCGGTGAAATCTTCGGATTCTGATTTGTTGCATTTATGTGATGAGTTGGGAAAAGTTGAGTAAACCTTATTGTTTAGAGGAAGGTGAAGTCGTAACAAGGTTTCC
1878	c9a0e70572cc9537b1dd80e550f8aead	OTU_1878	136	166	1	GTCGCTACTACCGATTGGATGGCTTAGTGAGGTCCTCGGATCGGCCCCGCCGGGGTCGGTCACGGTCCTGGCGGAGCGCCGAGAAGACGATCAAACTTGACTATCTAGAGGAAGTAAAAGTCGTAACAAGGTTTCC
1879	a8a09e4bd6a4d1568ea09c8271ff1060	OTU_1879	131	166	1	CGTCGCACCTACCGATTGAATGGTCCGGTGAAGCCTCGGGATTGTGATTGGTTCCCTTTATTGGGAGTCAGTTGCGAGAACCTGTCTAAACCTTATCATTTAGAGGAAGGTGAAGTCGTAACAAGGTTTCC
1880	1c1c7c5a70fe18c7642f608572db47f8	OTU_1880	106	166	2	GTCACACCATGGGAGTGGGTTGCTCCAGAAGTGGCTAGTCTAACCTTCGGGAGGACGGTCACCACGGAGTGATTCATGACTGGGGTGAAGTCGTAACAAGGTAGCC
1881	0b4ca8807a73cb78086b7e9243ccb2f9	OTU_1881	127	166	3	GTCGCTCCTACCGATTGGGTGATCCGGTGAATGACTCGGACTTTGACGTCCCTAGATACTAGGTTCGTTGAGGGAAGTTTTGTGAACCTTATCACTTGGAGGAAGGAGAAGTCGTAACAAGGTTTCC
1882	eacb2242d799e20234be8b902cd84b3b	OTU_1882	133	166	4	GTCGCTACTACCGACTGTTCGCTTCGTTGAGGGAATCGGATCGGTACCTCGCAGTGGGCAACCAGTGCGATGGCGCTGAAAAGATTTCCAAGACCGAGCGAATGAAGGAAGTAAAAGTCGTAACAAGGTTTCC
1883	fefb83ee8fa0d43fa60a7cd7de722d54	OTU_1883	136	166	2	GTCGCTACTACCGATTGAATGGTTTAGTGAGATCTTCGGATTGGAGTCCTCGGTGGCGGCGACGCCATCTTGGACAACCGAGAAGTTGAGCTAACTGAATTATTTAGAGGAAGTAAAAGTCGTAACAAGGTTTCCG
1884	876cd36ffd0799c2572e050060500eb1	OTU_1884	108	166	5	GTCAAGCCACGAGAGTCGGGAGCACCCGTAGTCGTTGATCCAACCCGCAAGGGAGGAAGACGCCGAAGGTGAGCTCGATGATTGGGACTAAGTCGTAACAAGGTAGCC
1885	e3e8367bae8284bf51bb720aed98deb4	OTU_1885	136	166	1	GTCGCTCCTACCGATTGAAATCAGCGATGAAATTCTCGGAGAGTAGCTTTGCGTCTGGTTCGCCGGACAAAACGTCGCTCGAAGTTACTTGAATCTCTGATTTTAGAGGAAGGAGAAGTCGTAACAAGGTTTCCGT
1886	8d3ba10758ee8bc4cd2516db338360a9	OTU_1886	131	166	4	CGTCGCACCTACCGATTGAATGATTCGGTGAAACTTTCGGACCAAGGACAGGACGCCTTCGGGCGACCTGACTTTGGGAAGTTATTTAAACCTCATCATTTAGAGGAAGGTGAAGTCGTAACAAGGTTTCC
1887	8f5ca9473659ae1fa5c0d15c3251bc11	OTU_1887	120	166	7	GTCGCTCCTACCGATTGGGCGATCCGGTGAACAACTCGGACCGTGCGTGCTTTCGGGGGCGCATGGGAAGTTTCGTGAACCTTATCGCCTAGAGGAAGGAGAAGTCGTAACAAGGTAGCC
1888	7ee72fd1e6d85db1a2f05ac455e9d0e3	OTU_1888	132	166	4	GTCGCTCCTACCGATTGAATGTGTTGGTGAGGAGCTCGGATTGGCAGTTAGTGGTGGTTCGCCACTGCTTGCAGCTGAGAAGTCCTCCAAACCGCCCCATTTAGAGGAAGGAGAAGTCGTAACAAGGTTTCC
1889	681668e0444411c21559a6a6c26e4c6b	OTU_1889	132	165	1	GTCGCTACTACCGATTGAATGGCTCAGTGAGGCCTTCGGACTGGCTCAGGAGGGTTGGCAACGACCCCCCAGAGCCGGAAAGTTGGTCAAACTCGGTCATTTAGAGGAAGTAAAAGTCGTAACAAGGTTTCC
1890	4027aac823c60ca71da9ea7074e692a5	OTU_1890	223	165	2	GTCGCACCTACCGATTGAATGGTCCGGTGAAATCTCGAGATTGTGATGAGTTTCCTTTATTGGGAGCTTGTCGCGAGAACTTGCTTAAACCTTATCATTTAGAGGAAGGTGAAGTCGTAACAAGGTTTCCGTAGGTACGTTAATTCAAACCCAGTTAGAATTGCGCCGAATCAATTGCTAGTCTTTTTTCTTACAATGTTGTTGAACCCTTTTGTGTTTCCTT
1891	fb4281b52c833d19062741dc2839ba38	OTU_1891	128	165	1	GTCGCACCTACCGATTGAATGATTCGATGAATTCTTCGGACTGTGATCATGACGCTTCGGCGACTTGGTCGTAGGAAGTTGTTTAAATCTCATCATTTAGAGGAAGGTGAAGTCGTAACAAGGTTTCC
1892	ca5691b71f5616a1609d85d9aae07838	OTU_1892	123	165	1	GTCGCACCTACCGATTGAATGATTCGGTGAAATCTCGGGACCGTGGATGTAGCTTCGGCGCTTCCGCGGGAACTTGCTTAAACCTCATCATTTAGAGGAAGGTGAAGTCGTAACAAGGTTTCC
1893	f0bf04970a2b383b3bd88be6040aef75	OTU_1893	131	165	1	CGTCGCACCTACCGATTGAATGGTCCGGTGAAGCCTCGAGATTGCGATTGGTTTGCTTTATTGCAAATTGATTGTGAGAACTTGTCTAAACCTTATCATTTAGAGGAAGGTGAAGTCGTAACAAGGTTTCC
1894	569d864aa5b53baa5591ca5d2db3ba05	OTU_1894	131	165	3	CCGTCGCTCCTACCGATTGAGTGATCCGGTGAATAATTCGGACTGCAGCAATGCTTGGATCCCGAACGTTGCAGCGGAAAGTTTAGTGAACCTTATCACTTAGAGGAAGGAGAAGTCGTAACAAGGTTTCC
1895	9fc90d1c999f3965903391f7e1aeae45	OTU_1895	131	165	3	CGTCGCACCAACCGATTGGATGTTTTGTTGAAATATGTGGATGTTTGTCGCGTGGATTCATTTTCGCCCGATAGACAGAAACGTATTAAAACTGAATATCTAGAGGATGGTGAAGTCGTAACAAGGTTTCC
1896	594f39c85989b59bd13ee63b7d9c8b9e	OTU_1896	133	165	4	GTCGCTACTACTGATTGGGTGTTCAAGCGAGGTCCTTGAATGCTAACATAAAATATGGACTACTATGTTTCCGTTCGAAGAAGAGGATCGAGCTTTTGCATCTAGAGGAAGTAAAAGTCGTAACAAGGTTTCC
1897	2d1570eca17d56e3c8e7f0e47d899d7b	OTU_1897	133	165	2	GTCGCTACTACTGATTGGACGTTTAAGCGAGATCTTCAGACCTTGGGCTCATGGTTCACCTGAACCTAGAGCTATGGGGGAAGTAGATCAAGCTTTGGTGTCTAGAGGAAGTAAAAGTCGTAACAAGGTTTCC
1898	35dec9bb2f4047d3771aa49027c5ecd0	OTU_1898	106	165	4	GTCGTTTCTTCCGACTGATACTTATTGTGAGCTGCAAGGATCCTTAATCAGAGAATTGCCGCAAATGCTCTGTATTGGAGGAAGAAAAAGTCGTAACAAGGTTATT
1899	5f1f47dc4ae8a854f44a331ab0840dea	OTU_1899	132	165	1	GTCGCACCTACCGATTGAATGATTCGGTGAAAATTTCGGACCGTGCCACTGTAACCTTCGTTGGGCGCGGTGATATGGGAAGTTATTTGAACCTCATCATTTAGAGGAAGGTGAAGTCGTAACAAGGTTTCC
1900	79567eea6d39da5f9a196ff461f90bea	OTU_1900	108	164	2	GTCAAGCCACGAAAGTGGGGTGCACCCGAAGTCGCCGTGGTAACCCGCAAGGGAGCTAAGCGCCGAAGGTGAACTCCGCGATTGGGACTAAGTCGTAACAAGGTAGCC
1901	e0aeaa822d7cb887913489869cece352	OTU_1901	128	164	2	GTCGCACCTACCGATTGGATGGTCCGGTGAAGCCTCGGGATTGTGGCCGGTGCATTAATTTGTGTCGGTTGCGAGAACTTGTCTAAACCTTATCATCTAGAGGAAGGTGAAGTCGTAACAAGGTTTCC
1902	43a8c5dc06b7efe8271f20bd2accfec5	OTU_1902	132	164	2	GTCGCACCTACCGATTGAATGGTCCGGTGAAATTTTCGGACCGTGACAATGTTACCTTAACTGGAGACGTTGTTATGGGAAGTTACTTAAACCTTACCATTTAGAGGAAGGTGAAGTCGTAACAAGGTTTCC
1903	a43a91a01098650bcb1bb380be21eed7	OTU_1903	126	164	1	GTCGCTCCTACCGATTGAGTGATCCGGTGAATACTTGGGACCGCGACGAATCCAATCTTGGTTTCGTTGTGGAAACTTGAGTGAACCTTATCACTTAGAGGAAGGAGAAGTCGTAACAAGGTTTCC
1904	bc465dee8f7dfe884f32d32ff9c7f0ca	OTU_1904	144	164	2	GTCGCTCCTACCGATTGAATGATCCGGTGAAAACTCAGGACTGGCGATCTATGTTTCCCTTTACGGGGTGACTTGATTGTTTTTTTCCGGGAATTTGTTTGAACCTTATCATTTAGAGGAAGGAGAAGTCGTAACAAGGTTTCC
1905	db5e357a7b56cfa4cd65109f7cd45550	OTU_1905	123	164	1	GTCGCTCCTACCGATTGAATGGTCCGGTGAAATGTTCGGACTGACGTGTGCCCTTGGGTTGCGCGTTGGAAAGTTCATTAAACCTTATCATTTAGAGGAAGGAGAAGTCGTAACAAGGTTTCC
1906	101ab2a674ca7b724bf438dfa747fb48	OTU_1906	127	164	5	GTCGCTCCTACCGATTGAGTGATCCGGTGAATAATTCGGACTGAGATTCTTCCGGCAACGGTTTGAGTTTTGGAAAGTCTAGTAAACCTTATCACTTAGAGGAAGGAGAAGTCGTAACAAGGTTTCC
1907	73c835ec917aab41a62eb338afd38b8c	OTU_1907	132	164	1	GTCGCACCTACCGATTGAATGGTCCGGTGAAGCTTTCGGACTACGGCAATGTCGCCTTCATCGGGGACGCTGCTATGGGAAGTTAGTTTAACCTTACCATTTAGAGGAAGGTGAAGTCGTAACAAGGTTTCC
1908	80f49b07aedd7706ab78719969f57429	OTU_1908	133	164	4	GTCGCACCAACCGATTGGATGTTTTGTTGAAATATGTGGGTATCTTTGTGGATGGTTTCATTACTGTCTGTTGAGGGTAGAAGTGTATTAAAACTGAATATCTAGAGGATGGTGAAGTCGTAACAAGGTTTCC
1909	b8aae7a106832bb211c554098a90ad86	OTU_1909	136	164	4	GTCGCACCTACCGATTGAATGGTCCGGTGAAATCTTTGGACCGCGACATTGTCTTACTTTCGGGTCAGACGCTGTCATGGGAAGTGGATTAAACCTTATCATTTAGAGGAAGGTGAAGTCGTAACAAGGTTTCCGT
1910	06555932c1127a9bffee8c48d89123a3	OTU_1910	136	163	2	GTCGCTACTACCGATTGAATGGTTCAGTGAGATAATCGGACAGAAAACTTGGCAACTGGCAACAGTTGACGTGCATTTTCGGAAGACGATCAAACTTGGTCATTTAGAGGAAGTAAAAGTCGTAACAAGGTTTCCG
1911	c354de9b0bae20f4939fa5d7975e36ea	OTU_1911	138	163	1	GTCGCTACTACCGATTGAATGGTTTAGTGAGACCCTCGGATTGGTCCCGGCTTGGCGTGCAAGCGCCTGGGCCGTGTTGGCCGAGAAGACGGTCAAACTTGATCATTTAGAGGAAGTAAAAGTCGTAACAAGGTTTCC
1912	6619367355004415649f6bb347f9adff	OTU_1912	121	163	3	GTCGCTCCTACCGATTTCGAGTGGTCCGGTGAACCCTTTGGACTGAGGAAGCCTTGAGCTTCTTTGGAAAGTCGAGTAAACCACATCACTTAGAGGAAGGAAAAGTCGTAACAAGGTTTCC
1913	1c591cd502c29a295b305eb82374e013	OTU_1913	131	163	1	CCGTCGCTCCTACCGATTGAGTGATCCGGTGAATAATTCGGACCGCGGCAATGTTTGGATCCCAAGCGTTGCCATGGAAAGTTTAGTGAACCTTATCACTTAGAGGAAGGAGAAGTCGTAACAAGGTTTCC
1914	c97fcaf411812dc7f6cc87a16447e85a	OTU_1914	128	163	1	GTCGCTCCTACCGATTGAGTGATCCGGTGAATAATTCGGACTGCAGGAGACCCGGTTCTCGGATCTCATTGCAGGAAGTTTAGTGAACCTTATCACTTAGAGGAAGGAGAAGTCGTAACAAGGTTTCC
1915	1e4f53ea46d0f73e7058b98bc31ad78b	OTU_1915	190	163	1	GTCAAATCAGGAAAATGAATTGGTTTCGAAGTTTCATTTAAATGTTTTATGGTTAATTTCAATTAATCAAATTAAAATTTTTTTAATAGTTATTAAAGTATTTTCCTTATTTTTTATTAAAATTTTAAGCATTCATTTAATGTTATGAAAAATTGGTTCGTAATCGTGATTAAGTCGTAACAAGGTAGTC
1916	7752d52c3bff07d74d352447a1e90404	OTU_1916	131	163	3	CGTCGCTTCAACCGATTGGATGATCCGGCAAATTACATGGACTCGCGCTCTTGGTGGCTTCGGTCGCAGTGCGCGGGGAAATGTCGTGAGCCTTATCATCTAGAGGATGAAGAAGTCGTAACACGGTATCC
1917	a892ba9b80067a070541014b2dd55dab	OTU_1917	142	163	3	GTCGCTACTACCGATTGGATGGTTTAGTGAGGTCCTCGGACTGGCCTTGGGGCGGCGGGCCTTCGGGTCCGTGCTCCGATCGAGCCGGGAAGACGATCGAACTTGATTATCTAGAGGAAGTAAAAGTCGTAACAAGGTTTCC
1918	1de8aa7fc0ff71c32a6aa9ee345ac2a7	OTU_1918	127	163	8	GTCGCTCCTACCGATTGAGTGGTTAGGTGAGGCCTTGGGAAGGCCAGTTGCAGGATTTTTCCTTCTTCTGGAACAACTTGGTCAAATCTCATCACTTAGAGGAAGGAGAAGTCGTAACAAGGTTTCC
1919	86307687d4ad3c35f7c08e43c2fea30c	OTU_1919	113	163	5	GTCAAGCCACCCAAGCAGGATGCACCCGAAAACATTATGTCTAACCAGGGTAACCTGGAGGAAGATGTTGAAGGAGTGTTTTGTGAGGAGGACTAAGTCGTAACAAGGTAGTC
1920	32e02084ae47a10f0f0d3dd91c62a240	OTU_1920	131	162	2	CGTCGCACCTACCGATTGAATGGTCCGGTGAAGCCTCGGGATTGTGGTTGGTTTCCTTGATTGGAAGTTAGTCGCGAAAACTTGTCTGAACCTTATCATTTAAAGGAAGGTGAAGTCGTAACAAGGTTTCC
1921	076f1b104fba1cf1e4acc58050529593	OTU_1921	131	162	3	CCGTCGCTCCTACCGATTGAGTGATCCGGTGAATAATTTGGACTGCAGCATTGGTCAGTTCATGATCTATGTAATGGAAAGTTTAATGAACCTTATCACTTAGAGGAAGGAGAAGTCGTAACAAGGTTTCC
1922	e18131db2f2e61b7f70432281585e472	OTU_1922	132	162	4	GTCGCACCTACCGATTGAATGATTCGGTGAAGATTTCGGACTGTGTCGTTGTTCCCTTCACTGGGCGTAGTGACGCGGGAAGTTATTTAAACCTCATCATTTAGAGGAAGGTGAAGTCGTAACAAGGTTTCC
1923	32e2026f2423c96764835bb38f390b10	OTU_1923	131	162	1	CGTCGCTCCTACCGATTGGATGAATCGATGAGTCGTTTGGAGGTCCCTACGAAAGTCTTCGGGCCGGAGTAGGAACCGAAATTCTGCAAATCTGTTCATCTAGAGGAAGGAGAAGTCGTAACAAGGTTTCC
1924	87689fc67fb4079e8e67d673f2103b8e	OTU_1924	131	162	7	CGTCGCTACTACCGATTGAACGTTTTAGTGAGGTCCTCGGACTGTGAGCCTGGCGGGTAACTCTGCCTGGTTTGCGGGAAGACGACCAAACTGTAGCGTTTAGAGGAAGTAAAAGTCGTAACAAGGTTTCC
1925	d32b14f6a5d56a7bcd23ef6fee508667	OTU_1925	136	162	3	GTCGCTCCTACCGATTGAATGATTCGATGAAATTTTCGGAGAATATCTTTGAGTCTGGTTCGCCGGACAAAAAGCTGTTCGAAGTTACTTAAATCTGATCATTTAGAGGAAGGAAAAGTCGTAACAAGGTTTCCGT
1926	b5cde81eb99f4a7c5d46f6e3ec8070f7	OTU_1926	128	162	9	GTCGCTCCTACCGATTGAATGCTCAGGTGAGCTATTCGGACCGACATCATGCTGGTTCCCAGTTTTGATATTGGAAAGTCTCGCGAACCTTATCATTTAGAGGAAGGAGAAGTCGTAACAAGGTTTCC
1927	ef0518032bf3fde739f21af6a1fdeab9	OTU_1927	131	162	4	CCGTCGCTCCTACCGATTGAGTGATCCGGTGAATAATTCGGACTGCAGCATTGTTCGGTTCCTGAACGTTGCAGCGGAAAGTTTAGTGAACCTTATCACTTAGAGGAAGGAGAAGTCGTAACAAGGTTTCC
1928	95ca549229ae262f5f5f629007caed18	OTU_1928	131	162	1	GTCGCTACTACCGATTGAATGGTTTAGTGAGATCTTCGGATTGTGGCAACGGGGATTTCGGTCCCTGTTGATTACGAGAAGTTGATCAAACTTGATCATTTAGAGGAAGTAAAAGTCGTAACAAGGTTTCC
1929	433504e2dfa09a856f2cd3c01022f014	OTU_1929	132	162	1	GTCGCACCTACCGATTGAATGGTCCGGTGAAATTTTCGGACCGTGGCAATGTTACCTTAATTGGAGACGCTGCCATGGGAAGTTACTTAAACCTTACCATTTAGAGGAAGGTGAAGTCGTAACAAGGTTTCC
1930	20491ffb0fee2c704ec0cb62aea393af	OTU_1930	113	161	1	GTCAAGCCACCCAAGCAGGATGCACCCGAAAACATTATATCTAACCAGGGTAACTTGGAGGAAAATGTTGAAGGAGTGTTTTGTGAGGAGGACTAAGTCGTAACAAGGTAGTC
1931	3654ad47ca4cf9d26bbd1cfc26650c48	OTU_1931	117	161	1	GTCGCTACTACCGATCGAGTGGTCAGGTGAACCTTTTGGACAGTATCTATTTATTTAGAACAGGAATTTAAGTAAATCTTATCACTTAGAGGAAGTAAAAGTCGTAACAAGGTTTCC
1932	43eb0408a240b0806a9ea1b28028f39f	OTU_1932	133	161	1	GTCGCACCTACCGATTGAATGCTCCCGTGAGGTTTTTGGACCGCGGCTTACATTTCCTTAATTGGAGACGTAGTTGTGGGAAGTTACCCAAACGTTAGCATTTAGAGGAAGGTGAAGTCGTAACAAGGTTTCC
1933	89e3f3cfa23e4b7304d198c907fb2d05	OTU_1933	131	161	2	CCGTCGCTCCTACCGATTGAGTGATCCGGTGAATAATTCGGACTGCAGCAGTGTTCGGTTCCTGAACGTTGCAGCGGAAAGTCTCGTGAACCTTATCACTTAGAGGAAGGAGAAGTCGTAACAAGGTTTCC
1934	c9caa518640e2099d67e5d464265b36a	OTU_1934	128	161	5	GTCGCTCCTACCGATCGAATGGTCCGGTGAATAATTCGAACTGATGCATTGATTGGTTGCCGAGAAATGCATCATATGTTGTGTAAACCTTATCACTTAGAGGAAGGAGAAGTCGTAACAAGGTTTCC
1935	519987126f6c8c67d01f3e0de94ee32b	OTU_1935	131	161	2	CGTCGCACCTACCGATTGAATGGTTCGGTGAAATCTCCGGATTGGAGCACGCAAGCTTCACGGCGAACGTGTTTTGAGAAGTTGATTAAACCTCACTATTTAGAGGAAGGTGAAGTCGTAACAAGGTTTCC
1936	de8a1d585d9c1406fb6e94c7ed294340	OTU_1936	131	161	3	CCGTCGCTCCTACTGATTGAGTGATCCGGTGAATATTTTGGACTGCAGCAAGACTCAGCTCCTGAGTGTTGCAGCACAAAGTTTAGTGAACCTTATCACTTAGAGGAAGGAGAAGTCGTAACAAGGTTTCC
1937	a88222d267bc72bfce4f509834b114a8	OTU_1937	125	161	1	GTCGTTGCCTGTAATGGGTTGTGAGTAGAGCCCTTTGGAGATTTTGTGATTCCTTGCGGTTGAATGAAATCAAAATTGGGCAATACTCGCAATCTAGAAGAGGCAAAAGTCGTAACAAGGTTGCT
1938	f04150474cfad13ce822523b2b1ec513	OTU_1938	106	161	2	GTCACACCATGGGAGTTGATCCAACCCTAAGCCGTAACCCTAACCCTCGGGAAGGGAGCGACCACGGTGGGATTGATGACTGGGGTGAAGTCGTAACAAGGTAGCC
1939	6e32f00e98637ef080a159fe4c63d8dd	OTU_1939	131	161	3	CGTCGCACCTACCGATTGAATGGTCCGGTGAGGCCTCGGGATTGTGACCAGTTTCCTTTATTGGGAGTTGGTTGCGAGAACTTGTCCAAACCTTATCATTTAGAGGAAGGTGAAGTCGTAACAAGGTTTCC
1940	d96bd94548dc114260bf0e6d6c80800d	OTU_1940	131	161	10	GTCGCTCCTACCGATTGAGTGGTCCGGTGAGGCTTTGGGATCTGAGCAAAAAGAGCGTTTCGCTCGTTTGGCCCGGAAAACTCAGTCGAACCTTATCATTTAGAGGAAGGAGAAGTCGTAACAAGGTTTCC
1941	5b4e85b1791ca31e3755f99ef1ee8e9a	OTU_1941	156	161	8	GTCAAGTCCTGGAAATTGGTTGAACCTTAAATGAATTTAGATGTATTTAGATTTTGTAACTCTGATATCAACGGGTATCTGGTTACAAATTTCTACTTATAAATATAATCATCACGGTATGATTGGTAACTGGGATTAAGTCGTAACAAGGTAATC
1942	3d5802cf0cd9908fe69b33b064208547	OTU_1942	137	161	3	GTCGCTACTACCGATTGAATGGTTTAGTGAGGCCTCCGGATTGGCACTGGTAGACGGGCTTCGGTTCGTCCGCCGGACGTCAAAAAGCTGGTCAAACTTGATCATTTAGAGGAAGTAAAAGTCGTAACAAGGTTTCC
1943	cadca595c7be358aca5c7e929e980d3c	OTU_1943	132	161	1	GTCGCACCTACCGATTGAATGATTCGGTGAAGATTTCGGACTGTGCCACTGTTCCCTTCACTGGGAGTGGTGATATGGGAAGTTATCTAAACCTCATCATTTAGAGGAAGGTGAAGTCGTAACAAGGTTTCC
1944	eec38609da340c12e68b5f57b29bd5cb	OTU_1944	122	160	2	GTCGCTCCTACCGATTTCGAGTGGTCCGGTGAGCCTTTCGGACTGCGCTCGCCCTCGAGGCGTCGCGGAAAGTCAGGCAAATCTTACTACTTAGAGGAAGGAGAAGTCGTAACAAGGTTTCC
1945	2301e914ecdc46c6502b015cfbdeebe8	OTU_1945	125	160	1	GTCGTTGCCTGTAATGGGTTGTGAGTAGAGCTTTTTGGAGATTTCGCGAAGGGGCAACTCTTTGTGGAGTCAAAATTTAGCAATACTCGCAATCTAGAAGAGGCAAAAGTCGTAACAAGGTTGCT
1946	410dd6a722d2c978c183466722a52a8e	OTU_1946	132	160	3	GTCGCAACTTCTGATTGAATGATTAGGTGAGATTTTTGGATTTGCCGAGTGCTGTCTTTATTGATGATGCTTGGCGAAGAAGAGAACCAAACCTAGTCATTTAGAGGAAGTTGAAGTCGTAACAAGGTTTCC
1947	53e3774df92349cebe1ce82541fca74e	OTU_1947	131	160	5	CCGTCGCACCTACCGATTGAATGGTCCGGTGAAGCCTCGGGATTGCAATGAGTTTCCTTTATTGGAGTTCGTCGCGAGAACTTGTCTAAACCTTATCATTTAGAGGAAGGTGAAGTCGTAACAAGGTTTCC
1948	e6f5e4388048b8a2394b3ada4186ad7a	OTU_1948	123	160	3	GTCGCTGCAACTGATTGGGTGATCTGGTGAACATCTTGGACTGGCTTGTTCAGATTAGAGCAAGCTGGAAAAGGACGTAAATCAGGTACATCTAGAAATTGCAAAAGTCGTAACAAGGTTTCC
1949	89e2114f37145dc4731b2a8bbc70a610	OTU_1949	106	160	9	GTCGTTTCTTCCGACTGATACTCATTGTGAGTTGCAAGGACTCTTTATTGGGGAATTGCTGCGAATGCTTTGTATTGGAGGAAGAAAAAGTCGTAACAAGGTTATC
1950	d0c1566520c03edb51b2e997da7a024d	OTU_1950	106	159	2	GTCACACCATGGGAGTGGGCTGCAAAAGAAGTGGCTAGTCTAACCTTCGGGAGGACGGTCACCACTTTGTGGTTCATGACTGGGGTGAAGTCGTAACAAGGTAGCC
1951	c9d94cf69f28336920dda54b2a5240ee	OTU_1951	116	159	1	GTCGCTGCTACCGATTTCGAGTGGTCCGGTGAACCACATGGACTATTTGGGCAACCGAATTGGAAGTGTAGTAAACCTTATCACTTAGAGGAAGCAGAAGTCGTAACAAGGTTTCC
1952	0a9da8ece94a9ae4ef8cbea1806e3595	OTU_1952	131	159	2	CCGTCGCTCCTACCGATTGAGTGATCCGGTGAATAATTCGGACTGTAATATTGTTCAGTTCTTGAATAATGTAATGGAAAGTTTAGTGAACCTTATCACTTAGAGGAAGGAGAAGTCGTAACAAGGTTTCT
1953	e874f30ff10128da8db2a4ae2d23ab4b	OTU_1953	136	159	1	GTCGCTACTACCGATTGAATGGTTTAGTGAGATCTTCGGATTGGCGCCACTGCAGCTCAGCAATGGGCTTGGTGGATGCCGAAAAGTTGATCAAACTTGATCATTTAGAGGAAGTAAAAGTCGTAACAAGGTTTCC
1954	515537ea5eade6d2b33117741f029b7f	OTU_1954	136	159	1	GTCGCTCCTACCGATTGAAGTTTTCGGTGAGTTGACAGGAGGATTTTTTTGAAACTGGTTTGCCAGTGGATTTTAGATCCAAATGCCAACGAATCGATGGCTTTAGAGGAAGGAGAAGTCGTAACAAGGTTTCCGT
1955	49e1fe57bd301a03d5cb497f093e0a66	OTU_1955	109	159	2	GTCACACCACGAAAGCTGTTTGTACCCGAAATCATTTTAGCTGACCCGTTAGGGAGGCGGATGCTGAAGGTGTGGATAGTGATTGGGGTGAAGTCGTAACAAGGTAGCT
1956	26ebe53f391c29b881d2baee4389c6e8	OTU_1956	132	159	1	GTCGATCCTACCGATTGAATGGTCCGGTGAAGCGTTTGGACTATGGTTTTCTGGCGGTTCGCCATTGGATTACCGTGGGAAATTCGTTAAACCTTATCATTTAGAGGAAGGAGAAGTCGTAACAAGGTTTCC
1957	36594c501b819d0d8e5cafcdfd519b5f	OTU_1957	128	159	6	GTCGCACCTACCGATTGGATGGTCCGGTGAAGCCTCGGGATTGTGACTGGTGCCTTTATTGGTGTCGGTTGCGAGAACTTGTCTAAACCTTATCATCTAGAGGAAGGTGAAGTCGTAACAAGGTTTCC
1958	40c4d86e46594d1ce12bf132de39e180	OTU_1958	132	159	1	GTCGCTACTACCGATTGGACGTTTTAGTGAGGATTTTGGACTTGACCGCGGAAGGCTCGCGTTTTCCGCGCTGTTGGGGAAGATCTCCAAACTTGAGCGTTTAGAGGAAGTAAAAGTCGTAACAAGGTTTCC
1959	6672357769a00e1f086265d80c7202ac	OTU_1959	105	159	3	GTCGTTTCTTCCGACTGATACTCATTGTGAGTTGCAAGGATTCAGTTAGAAAAATTGCCGCAAATGCTTTGTATTGGAGGAAGAAAAAGTCGTAACAAGGTTATC
1960	a1461918d6af066b70e4a7f62e1ae7c3	OTU_1960	131	158	4	GTCGCTACTACTGATTGGATGTTTAAGCGAGGTTCTCGAACTGCTAGTGACTGATCTTCGGTGAGGTCGCAGTGTGGGAAGTGAACCTAGCTTTGGTGTCTAGAGGAAGTAAAAGTCGTAACAAGGTTTCC
1961	4ff9258f4079d0beaa4f51cd917eaa5c	OTU_1961	106	158	7	GTCAAGCCACGAAAGCTGGGAGTACCCGAAGTCGTGTACCCAACCGCAAGGAGGGAAGCGCCGACGGTAAGCTCAGTGATTGGGACTAAGTCGTAACAAGGTAGCC
1962	196fdb2e6acb531e825afb33edc436ec	OTU_1962	123	158	5	GTCGCTTATACCGATTTCGAGTGGTCCGGTGAATCTTTTGGAGAGACGCGCAACTCGATTGCGCTGCTCAAAGTCAGATAAATCGTAACACTTAGAGGAATAAGAAGTCGTAACAAGGTTTCC
1963	392f9bea3b4d74713fabdaed6401c761	OTU_1963	132	158	6	GTCGCACCTACCGATTGAATGGTCCGGTGAAGACTCCGGATGGAGATGCTGCTGGCTTCGGTCAGATCAGCGTCACCAGAAGTTGTCTAAACCTTACCATTTAGAGGAAGGTGAAGTCGTAACAAGGTTTCC
1964	95e4f57e2aae30a997be3e5894ebbe90	OTU_1964	131	158	1	CGTCGCACCTACCGATTGAATGGTCCGGTGAAGCCTCGGGATTGTGACCAGTTCACTTTATTGGGAGTTGGTTGCGAGAACTTGTCTAAACCTTATCATTTAGAGGAAGGTGAAGTCGTAACAAGGTTTCC
1965	21e8ba13410dd6092fa6bc292831cfe1	OTU_1965	131	158	4	CGTCGCTACTACCGATTGGGAAAATTTCAGAATGCTTAGGACTGAGACTTGTTTGGCTTTGGCCTTACTCGTTTTGGAAATAAGTATAATGATATTTTCCTAGAGGAAGTAAAAGTCGTAACAAGGTTTCC
1966	db7b6f5e67ec91600ef4d5798ef2e37d	OTU_1966	108	158	2	GTCACATCACGAAAGCTGGTTGCACCTGAAACCGGTGGGCCAACCCCTTGGGGAGGCAGCCGTTTACGGTGTGATTGGTGATTGGGGTGAAGTCGTAACAAGGTAGCT
1967	6bb3f36a39b8b4c492a89b8508efe958	OTU_1967	136	158	3	GTCGCTCCTACCGATTGAAGTTTTCGGTGAATTTGCTGGAGGTTCGCTTTGAACCTGGTTCGCCAGCGGATTTGTGTCCCAAAAGCAAATGAATCGATGGCTTTAGAGGAAGGAGAAGTCGTAACAAGGTTTCCGT
1968	363397c5ce17598c21d3cef84113640e	OTU_1968	110	158	2	GTCACACCATGGGAGTTGGATTCACCCGAAGGTGGTGCGCTAACCAGTTTACTGGAGGCAGCCAACCACGGTGGGTTCAGCGACTGGGGTGAAGTCGTAACAAGGTAGCC
1969	1ab57ef0e5522e56d1ba6fe70ef81243	OTU_1969	128	158	3	GTCGCTCCTACCGATTGAGTGATCCGGTGAATAATTCGGACTACAGGTCGCGCAGTTTCTGTGCTTCGCTGCAGGAAGTTTAGTAAACCTTATCACTTAGAGGAAGGAGAAGTCGTAACAAGGTTTCC
1970	1933e341d6094bd46966cd96502bb0dc	OTU_1970	106	157	1	GTCACACCATGGGAGTTGATATTGGCAGAATACATTGGGCTAACCTTCGGGGAGCAGGTGTGCAAGCTAGTGTCGATGACTGGGGTGAAGTCGTAACAAGGTAGCA
1971	d075b1b1e9247fc0fc312659b1e514e8	OTU_1971	149	157	3	GTCGCTACTACCGATTGAATGGTTTAGTGAGGCCCTCAGATCTGTCCCAGCCAGGGTTCTTCCTTCTCGGAGGGGAGCCCGGTTGGTGTTGCAGAGAAGACGGTCGAACTTGATCATTTAGAGGAAGTAAAAGTCGTAACAAGGTTTCC
1972	ba985b615cca7daeaa0bcea395cea9cf	OTU_1972	106	157	2	GTCACACCATGGGAGTGGGCTGCACCAGAAGCAGGTAGTCTAACCTTCGGGAGGGCGCTTGCCACGGTGTGGTTCATGACTGGGGTGAAGTCGTAACAAGGTAGCT
1973	c8e48fffea2d06786cfdfb7fdd209ea4	OTU_1973	107	157	7	GTCAAACCACGAAAGTTTTTTGTACCTGAAGCTGTTTTAGCTAACCTTTTGGAGGCGAACAGCGATGGTATGGGAGATGATTGGGGTTAAGTCGTAACAAGGTAGCT
1974	134425ce7ae3cba5eec353cc25fda6de	OTU_1974	132	157	6	GTCGCACCTACCGATTGAATGGTCCGGTGAAATTTTCGGACTTTGGCATTTCACCCTTTATTGGGAGAGCTGCCGAGGGAAGTTAATTAAACCTTACCATTTAGAGGAAGGTGAAGTCGTAACAAGGTTTCC
1975	77b3c24b5610c61298a178da4e4b12f5	OTU_1975	131	157	1	CGTCGCACCTACCGATTGAATGATCCGGTGAAGCCTCGGGATTGTGGTCAGTTTGCTTCATTGCGAGTTGACTGCGAGAACTTGTCTAAACCTTATCATTTAGAGGAAGGTGAAGTCGTAACAAGGTTTCC
1976	462e7847d5e117bb77af56fdb017dc78	OTU_1976	132	157	1	GTCGCTACTACCGATTGAATGGTTTAGCGAGATTCTCGGATCGAGCCCTGGCCGTGCGCGAGCATGGTCGAGGCTTGAGAAGAAGTTCAAGCTTGATCATTTAGAGGAAGTAAAAGTCGTAACAAGGTTTTC
1977	fb993074a505f9f7664bcb5b053c3c45	OTU_1977	107	156	5	GTCACATCATGAAAGCCGGTTTCGCCCGAAGTACGTGCGCTAACCTTTTAGGAGGCAGCGTCCGACGGTGAGGCTGGTGATTGGGATGAAGTCGTAACAAGGTAGCC
1978	73a546541a18bb4ebaef07cd75227cdb	OTU_1978	131	156	7	GCAACTAGTTGTGGTTCTCCGACGACACTATACCTCTTTGTTCCGTCGTAGTCAATAGGCAGAGGTACATCATCATCTGGATCGTCATCGTCGTCATCACCCTCGTCGTCTGGGATTGGTTCGTAATCTTC
1979	c52160f3258aa1b8d5503526fc312742	OTU_1979	106	156	11	GTCACACCATGGGAGTTGGTTTTACCCGAAGGCGGTGCGCTAACCTTTTGGAAGCAGCCGACCACGGTAGGGTCAGCGACTAGGGTGAAGTCGTAACAAGGTAGCC
1980	51ffdb8f1dcee1e15856ae3dc87a5514	OTU_1980	131	156	4	CGTCGCTACTACTGATTGGGTGTTCAAGTGAGATGCTTAGACCATTGCTGCATGGTTCAATATTGTGCTGCGAAAGGAAAAAGTTTCAAGCTTGAGTGTCTAGAGGAAGTAAAAGTCGTAACAAGGTTTCC
1981	7e975648de2885f353c21eadcfebce0a	OTU_1981	136	156	6	GTCGCACCTACTGATTGAATGTTCCAGTGAAATCCTCGGATTCTGTATGTCTTTCTTTTTCATTAAAGTTTGATTTACGGGAAAAGTTGCTTGAACTTTGGCATTTAGAAGAAGGTGAAGTCGTAACAAGGTTACC
1982	0bb02592db17f8ff804559c7f3477ca6	OTU_1982	136	156	2	GTCGCTACTACCGATTGAATGGTTTAGTGAAGTCTCAGGATTGGCTGCCTTGCCTTTCACGAGGTCAGGGATTTAGCCGAGAATTTGATTAAACTTGATCATTTAGAGGAAGTAAAAGTCGTAACAAGGTTTCCGT
1983	392b02911de2602c3c7e48b1bd1c0212	OTU_1983	132	156	1	GTCGCTACTACCGATTGAATGGTTTAGCGAGATCCTCGGATCGAGCCATGGTCGTGCGAGAGCATGACCAAGGCTTGAGAAGAAGCTCAAGCTTGATCATTTAGAGGAAGTAAAAGTCGTAACAAGGTTTTC
1984	1a85d14d85d32099944af65d032f2c26	OTU_1984	137	156	3	GTCGCTACTACCGATTGAATGGTTTAGTGAGGCCTCCGGATTGGCACTGTCAGATGGACTTCGGTTCATCCGACGGACGTCAAAAAGTTGGTCAAACTTGATCATTTAGAGGAAGTAAAAGTCGTAACAAGGTTTCC
1985	9785c19760e4d6c66f11e16e52783eaf	OTU_1985	128	156	2	GTCGCACCTACCGATTGAATGGTCCGGTGAAGCCTCGGGATTGTGTCCGGTGCCTTTATTGGTGCCGGTTGCGAGAACTTGTCTAAACCTTATCATTTAGAGGAAGGTGAAGTCGTAACAAGGTTTCC
1986	7a5c4155ba1d4c1d73cab633e6c3ef83	OTU_1986	131	156	1	CGTCGCACCTACCGATTGAATGGTCCGGTGAAGCCTCGGGATTGTGGCCAGTTCCTTTCACTGGGAGTTGGTTGTGAGAACTTGTCTAAACCTTATCATTTAGAGGAAGGTGAAGTCGTAACAAGGTTTCC
1987	7a7b1de1acb62e9ed2c27e9e4def7290	OTU_1987	133	155	3	GTCGCTACTACCGATTGAACGTTTTAGTGAGGTATTTGGACGAGGCCTCTCGAGGTTTTTAATCTCGACTGTTGCCTTGGAAGACTCCCAAACTTGAGCGTTTAGAGGATGTAAAAGTCGTAACAAGGTTTCC
1988	9ccba60a12df2c428eccc6ec2b690164	OTU_1988	132	155	1	GTCGCACCTACCGATTGAATGACCCGGTGAAATCTTCGGATCGTGATCTTGCCCGATTCATTTCGGGCGATGTTGCGAGAAGTTGTTTAAACCTTGCCATTTAGAGGAAGGTGAAGTCGTAACAAGGTTTCC
1989	5dcb63fc1d1467c115d44b0f5f3d869a	OTU_1989	136	155	2	GTCGCTCCTACCGATTGAACGATGTGATGAAAATTTCGGAGTCTCGTTTTGAGTCCGGTTCTCCGGACAAAAAACGAGTCAAAGTTGCTTGAATCCCATCGTTTAGAGGAAGGAGAAGTCGTAACAAGGTTTCCGT
1990	61c9a347dfb16b1839d47689c2b2e148	OTU_1990	133	155	3	GTCGCTCCTACCGATTGAATGATCCGGTGAGGCCCCCGGACTGTGGCAACGGCTTTGGTTCGCCAAACTGATGTTGCGGGAAGCTGTCCAAACCTTATCATTTAGAGGAAGGAGAAGTCGTAACAAGGTTTCC
1991	5f3daaf33809a4dc86d90569cb500a5e	OTU_1991	124	155	3	GTCGCTGCAACTGATTGAGTGATTTGGTGAATGGCTTGGATCAATTTTTTGGTTCGCTAAAGAGTTGGAGAAGAGCTGTAAACTATATTTGCTTAGAAATTGCAAAAGTCGTAACAAGGTTTCC
1992	ea87251b339ffc6a5712336309d6ed18	OTU_1992	131	155	4	CGTCGCACCTACCGATTGAATGGTCCGGTGAAGCCTCGGGATTGTGGTCAGTTCCCTTTGCTGGGAGCTGGTTGCGAGAACTTGTCTAAACCTTATCATTTAGAGGAAGGTGAAGTCGTAACAAGGTTTCC
1993	f763244f6372047041b7199cd743fb45	OTU_1993	109	155	7	GTCACACCATGGGAGTTGGTTCTACCCGACGGCCGTGCGCTAACCTCTCTGAGGAGGCAGCGGACCACGGTAGGATCAGCGACTGGGGTGAAGTCGTAACAAGGTAGCC
1994	d3823eed02c81e4a8a8e6745f7db3d0f	OTU_1994	136	155	1	GTCGCTACTAGCGATTGAATGGTTTAGTGACGCCTCCGAATTCGCACTGTCAGGTATGCCTCGGCGTATCCGACGGACGTGAAGAAGTTGGTCAAACTTGATCATTTAGAGGAAGTAAAATCGTAACAACGTTTCC
1995	ead341868c68770cf680b2e7e57bc2f7	OTU_1995	132	155	4	GTCGCACCAACCGATTGAATGGTTCGGTGAAGAATCTGGACACATGAAAAGGATGATTCAGTTCGTTTTTTTTGAGTGAAAATTTTCTAAACCTAACTCTTTAGAGGATGGTGAAGTCGTAACAAGGTTTCC
1996	dea08000adfda7df4ffe88024e5e4498	OTU_1996	132	154	3	GTCGCACCTACCGATTGAATGATTCGGTGAAAATTCGGGACTGCGGTATGCTTGCCTTTATTGGTGAGCAGGCTGTGGAAACTTATTTAAACCTCATCATTTAGAGGAAGGTGAAGTCGTAACAAGGTTTCC
1997	3835bfbb6a9b2b609824b8d7c4cbca76	OTU_1997	126	154	2	GTCGCACCTACCGATTGAATGATTCGGTGAAATCTCGGGACCGGGGATGTTGCTTTACGGCACGTCTGTCGGGAACTTGCTTAAACCTCATCATTTAGAGGAAGGTGAAGTCGTAACAAGGTTTCC
1998	84c8c8e2ffa86a1c638488231ac2ceec	OTU_1998	131	154	3	CGTCGCTCCTACCGATTGAGTGATCCGGTGAATAATTCGGACCTGCGAGCCTTGCGGTTCGCTGCTTGGTTTGTGGGAAAGTCTAGTGAACCTTATCACTTAGAGGAAGGAGAAGTCGTAACAAGGTTTCT
1999	4f8e39d1cd5e8756dd9716233c31291c	OTU_1999	131	154	5	CCGTCGCTCCTACCGATTGAGTGATCCGGTGAATAATTCGGACGGCACCTTTTGGCAGTTTCTGCCATGAGGAGCTGGAAGTTTAGTGAACCTTATCACTTAGAGGAAGGAGAAGTCGTAACAAGGTTTCT
[truncated: 18,487 more rows]
