# Supplementary material for: Diversity and distribution of Symbiodiniaceae detected on coral reefs of Lombok, Indonesia using environmental DNA metabarcoding
Source: PeerJ. 2022 Oct 24;10:e14006. doi: 10.7717/peerj.14006 (PMC9610659; doi:10.7717/peerj.14006)
Supplement: File S2 [file peerj-10-14006-s003.xlsx]

## Sheet: Eukaryote taxon 97%
Feature_id	OTU_id	Taxon_L_1	Taxon_L_2	Taxon_L_3	Taxon_L_4	Taxon_L_5	Taxon_L_6	Taxon_L_7	Taxon_L_8	Taxon_L_9	Taxon_L_10	Taxon_L_11	Taxon_L_12	Taxon_L_13	Taxon_L_14	Taxon_L_15	Confidence
c3ee8526de03da01ad3d737711cd9f56	OTU_1	D_0__Eukaryota															1
b991eb96bb7b322b992e1ce0910107f9	OTU_2	D_0__Eukaryota	D_1__Opisthokonta	D_2__Holozoa	D_3__Metazoa (Animalia)	D_4__Eumetazoa	D_5__Bilateria	D_6__Arthropoda	D_7__Crustacea	D_8__Maxillopoda	D_9__Copepoda	D_10__Cyclopoida	D_11__uncultured eukaryote	D_12__	D_13__	D_14__	0.990816
89cb70361e0b2c5493eac0a716288636	OTU_3	D_0__Eukaryota	D_1__Opisthokonta	D_2__Holozoa	D_3__Metazoa (Animalia)	D_4__Eumetazoa	D_5__Bilateria	D_6__Chordata	D_7__Vertebrata	D_8__Gnathostomata	D_9__Euteleostomi	D_10__Actinopterygii	D_11__Neopterygii	D_12__Teleostei	D_13__Oreochromis niloticus (Nile tilapia)	D_14__	0.706874
e02863b01de58e6339992ffb0dfaad61	OTU_4	D_0__Eukaryota	D_1__Opisthokonta	D_2__Holozoa	D_3__Metazoa (Animalia)	D_4__Eumetazoa	D_5__Cnidaria	D_6__Hydrozoa	D_7__Hydroidolina	D_8__Siphonophorae	D_9__uncultured eukaryote	D_10__	D_11__	D_12__	D_13__	D_14__	0.991309
37983599da34156f5fd64e2c604a268d	OTU_5	D_0__Eukaryota	D_1__Opisthokonta	D_2__Holozoa	D_3__Metazoa (Animalia)	D_4__Eumetazoa	D_5__Bilateria	D_6__Arthropoda	D_7__Crustacea	D_8__Maxillopoda	D_9__Copepoda	D_10__Calanoida	D_11__uncultured eukaryote	D_12__	D_13__	D_14__	0.988117
590f64a44facc52cd027c3f6c1ef9af9	OTU_6	D_0__Eukaryota															1
6d4981b585ad288f43358bf76b4d5dcf	OTU_7	D_0__Eukaryota	D_1__Opisthokonta	D_2__Holozoa	D_3__Metazoa (Animalia)	D_4__Eumetazoa	D_5__Cnidaria	D_6__Hydrozoa	D_7__Trachylinae	D_8__Trachymedusae	D_9__uncultured metazoan	D_10__	D_11__	D_12__	D_13__	D_14__	0.979284
6bb6d5805cf87f433356a873aab61fb4	OTU_8	D_0__Eukaryota															1
1da16759bbe92942257345d8104fd234	OTU_9	D_0__Eukaryota	D_1__Opisthokonta	D_2__Holozoa	D_3__Metazoa (Animalia)	D_4__Eumetazoa	D_5__Bilateria	D_6__Annelida	D_7__Polychaeta	D_8__Palpata	D_9__Phyllodocida	D_10__Typosyllis cf. lutea MTA-2011	D_11__	D_12__	D_13__	D_14__	0.999996
178ed3007e4de9db92330fde5facf76a	OTU_10	D_0__Eukaryota	D_1__SAR	D_2__Stramenopiles	D_3__Ochrophyta	D_4__Diatomea	D_5__Bacillariophytina	D_6__Mediophyceae	D_7__Chaetoceros	D_8__Chaetoceros sp.	D_9__	D_10__	D_11__	D_12__	D_13__	D_14__	0.912767
6d6628fa112c7c53d1438e00d56fdcef	OTU_11	D_0__Eukaryota	D_1__Opisthokonta	D_2__Nucletmycea	D_3__Fungi	D_4__Dikarya	D_5__Basidiomycota	D_6__Agaricomycotina	D_7__Agaricomycetes	D_8__Agaricales	D_9__Schizophyllaceae	D_10__Schizophyllum	D_11__Schizophyllum commune	D_12__	D_13__	D_14__	0.951249
4dcf8aab2b1c0393b34c6aa6a1a1d00b	OTU_12	D_0__Eukaryota	D_1__Opisthokonta	D_2__Holozoa	D_3__Metazoa (Animalia)	D_4__Eumetazoa	D_5__Bilateria	D_6__Arthropoda	D_7__Crustacea	D_8__Maxillopoda	D_9__Copepoda	D_10__uncultured eukaryote	D_11__	D_12__	D_13__	D_14__	0.958214
1b6f334a42ac152be697497779d06361	OTU_13	D_0__Eukaryota	D_1__SAR	D_2__Alveolata	D_3__Dinoflagellata	D_4__Dinophyceae	D_5__Gymnodiniphycidae	D_6__Gymnodinium clade	D_7__Erythropsidinium	D_8__Warnowia sp. BSL-2009a	D_9__	D_10__	D_11__	D_12__	D_13__	D_14__	0.903916
f0be5531624c827e14746ca2f610f7ba	OTU_14	D_0__Eukaryota	D_1__Archaeplastida	D_2__Chloroplastida	D_3__Chlorophyta	D_4__Mamiellophyceae	D_5__Mamiellales	D_6__Micromonas	D_7__uncultured eukaryote	D_8__	D_9__	D_10__	D_11__	D_12__	D_13__	D_14__	0.932072
da6b3cc72a29241d16fdcf32e96cc16f	OTU_15	D_0__Eukaryota	D_1__SAR	D_2__Stramenopiles	D_3__Ochrophyta	D_4__Diatomea	D_5__Bacillariophytina	D_6__Bacillariophyceae									0.999776
fd7043e394422ff07bfa836285c67214	OTU_16	D_0__Eukaryota	D_1__SAR	D_2__Alveolata	D_3__Dinoflagellata	D_4__Dinophyceae	D_5__Gymnodiniphycidae										0.716775
a8ec7b66a794239027e3d955cdfec2e6	OTU_17	D_0__Eukaryota	D_1__SAR	D_2__Stramenopiles	D_3__Ochrophyta	D_4__Diatomea	D_5__Bacillariophytina	D_6__Mediophyceae	D_7__Skeletonema								0.957421
41f13b64037fb4bb8948926434896022	OTU_18	D_0__Eukaryota															1
e886e8ce4c5a0232dd489a73db52102e	OTU_19	D_0__Eukaryota	D_1__SAR	D_2__Alveolata	D_3__Dinoflagellata	D_4__Dinophyceae											0.70197
e265c9b4be9a96618f4496ce4a44adbe	OTU_20	D_0__Eukaryota	D_1__Opisthokonta	D_2__Holozoa	D_3__Metazoa (Animalia)	D_4__Eumetazoa	D_5__Bilateria	D_6__Arthropoda	D_7__Crustacea	D_8__Maxillopoda	D_9__Copepoda	D_10__Cyclopoida	D_11__uncultured eukaryote	D_12__	D_13__	D_14__	0.999644
effde0d180994ef85936f3af4b1ae8eb	OTU_21	D_0__Eukaryota	D_1__Opisthokonta	D_2__Holozoa	D_3__Metazoa (Animalia)	D_4__Eumetazoa	D_5__Bilateria	D_6__Arthropoda	D_7__Crustacea	D_8__Maxillopoda	D_9__Copepoda	D_10__Cyclopoida					0.852441
3bd0fe508639bcbab507dc9a0a0d8e83	OTU_22	D_0__Eukaryota	D_1__SAR	D_2__Alveolata	D_3__Dinoflagellata	D_4__Dinophyceae											0.846419
631e1d8e37d60275478192c6de71c752	OTU_23	D_0__Eukaryota	D_1__SAR	D_2__Stramenopiles	D_3__Ochrophyta	D_4__Pelagophyceae	D_5__Pelagomonadales	D_6__Pelagomonas	D_7__Pelagomonas calceolata	D_8__	D_9__	D_10__	D_11__	D_12__	D_13__	D_14__	0.99949
db7b95761f05f0fc74d112944af253af	OTU_24	D_0__Eukaryota	D_1__Opisthokonta	D_2__Holozoa	D_3__Metazoa (Animalia)	D_4__Eumetazoa	D_5__Bilateria	D_6__Platyhelminthes	D_7__Rhabditophora	D_8__Polycladida	D_9__uncultured eukaryote	D_10__	D_11__	D_12__	D_13__	D_14__	0.797772
fbf44a9dfc990fce8011d4be5fca0c9e	OTU_25	D_0__Eukaryota															1
6922aeb779befedeae9033f98d1519b0	OTU_26	D_0__Eukaryota	D_1__SAR	D_2__Stramenopiles	D_3__Ochrophyta	D_4__Diatomea	D_5__Bacillariophytina	D_6__Mediophyceae	D_7__Minutocellus	D_8__uncultured Minutocellus	D_9__	D_10__	D_11__	D_12__	D_13__	D_14__	0.999014
e98db571f5d98b2f5087fcebc48efd49	OTU_27	D_0__Eukaryota	D_1__Opisthokonta	D_2__Holozoa	D_3__Metazoa (Animalia)	D_4__Eumetazoa	D_5__Bilateria	D_6__Annelida	D_7__Polychaeta	D_8__Palpata	D_9__Phyllodocida	D_10__Kefersteinia cirrata	D_11__	D_12__	D_13__	D_14__	0.990483
3f1d9f1800bf5975058d82326a885d1a	OTU_28	D_0__Eukaryota															1
f48a7a2d81dbfb9ee5c08c255d07e60e	OTU_29	D_0__Eukaryota	D_1__Opisthokonta	D_2__Holozoa	D_3__Metazoa (Animalia)	D_4__Eumetazoa	D_5__Bilateria	D_6__uncultured	D_7__uncultured eukaryote	D_8__	D_9__	D_10__	D_11__	D_12__	D_13__	D_14__	0.893917
3a0c19f5355c37dac277fa383b30118b	OTU_30	D_0__Eukaryota	D_1__Opisthokonta	D_2__Holozoa	D_3__Metazoa (Animalia)	D_4__Eumetazoa	D_5__Bilateria	D_6__Chordata	D_7__Tunicata	D_8__Appendicularia	D_9__Copelata	D_10__Oikopleuridae	D_11__uncultured metazoan	D_12__	D_13__	D_14__	0.988398
b23f2a4002debf6ab3a24130c176f8de	OTU_31	D_0__Eukaryota	D_1__Opisthokonta	D_2__Holozoa	D_3__Metazoa (Animalia)	D_4__Eumetazoa	D_5__Bilateria	D_6__Chordata	D_7__Tunicata	D_8__Appendicularia	D_9__Copelata	D_10__Oikopleuridae	D_11__uncultured eukaryote	D_12__	D_13__	D_14__	0.998974
d5b3cf7b11b289d32b83da4125116934	OTU_32	D_0__Eukaryota	D_1__Opisthokonta	D_2__Holozoa	D_3__Metazoa (Animalia)	D_4__Eumetazoa	D_5__Bilateria	D_6__Arthropoda	D_7__Crustacea	D_8__Maxillopoda	D_9__Copepoda						0.971953
8f98c1c13d38d3d080a758f908222968	OTU_33	D_0__Eukaryota	D_1__SAR	D_2__Stramenopiles	D_3__Ochrophyta	D_4__Diatomea	D_5__Bacillariophytina	D_6__Bacillariophyceae									0.97578
81fd34670ab5bced282f49c7ac35e59c	OTU_34	D_0__Eukaryota	D_1__Opisthokonta	D_2__Holozoa	D_3__Metazoa (Animalia)	D_4__Eumetazoa	D_5__Bilateria	D_6__Arthropoda	D_7__Crustacea	D_8__Maxillopoda	D_9__Copepoda	D_10__uncultured eukaryote	D_11__	D_12__	D_13__	D_14__	0.815567
8f3598ec31b4e219c8a9623f8da9c2ae	OTU_35	D_0__Eukaryota	D_1__Opisthokonta	D_2__Holozoa	D_3__Metazoa (Animalia)	D_4__Eumetazoa	D_5__Bilateria	D_6__Annelida	D_7__Polychaeta								0.736852
d749cc7dc24627de9b19d5d2806b95cb	OTU_36	D_0__Eukaryota	D_1__SAR	D_2__Alveolata	D_3__Protalveolata	D_4__Syndiniales	D_5__Syndiniales Group I	D_6__uncultured Duboscquella	D_7__	D_8__	D_9__	D_10__	D_11__	D_12__	D_13__	D_14__	0.999999
d06066c557ac3be9a25b76362c4ae8b4	OTU_37	D_0__Eukaryota	D_1__Opisthokonta	D_2__Holozoa	D_3__Metazoa (Animalia)	D_4__Eumetazoa	D_5__Bilateria	D_6__uncultured	D_7__uncultured eukaryote	D_8__	D_9__	D_10__	D_11__	D_12__	D_13__	D_14__	0.963662
af2d20002e8ea63f5f6dad79ad68eeb8	OTU_38	D_0__Eukaryota															1
f4880d48cee8834f1e5bfbf63293ac6f	OTU_39	D_0__Eukaryota															1
de04b52c713c2e40e13c359131035391	OTU_40	D_0__Eukaryota	D_1__SAR	D_2__Alveolata	D_3__Dinoflagellata	D_4__Dinophyceae											0.940369
61956237849d076acba6b493a91fd577	OTU_41	D_0__Eukaryota	D_1__SAR	D_2__Alveolata	D_3__Dinoflagellata	D_4__Dinophyceae	D_5__Peridiniphycidae	D_6__Peridiniales	D_7__Peridinium	D_8__uncultured eukaryote	D_9__	D_10__	D_11__	D_12__	D_13__	D_14__	0.784906
a70614eb21a37ad068e97c71f3dcce2b	OTU_42	D_0__Eukaryota	D_1__Opisthokonta	D_2__Holozoa	D_3__Metazoa (Animalia)	D_4__Eumetazoa	D_5__Bilateria	D_6__Arthropoda	D_7__Crustacea	D_8__Maxillopoda	D_9__Copepoda						0.96679
b970d8460f2c424eb93c7c4f9b2f0275	OTU_43	D_0__Eukaryota	D_1__SAR	D_2__Alveolata													0.999898
8e579b42f3f7a2183c7e089fba273061	OTU_44	D_0__Eukaryota															1
027eb3b2396f93c16e40b6dd9e4ed8e2	OTU_45	D_0__Eukaryota	D_1__Opisthokonta	D_2__Holozoa	D_3__Metazoa (Animalia)	D_4__Eumetazoa	D_5__Bilateria	D_6__Chordata	D_7__Vertebrata	D_8__Gnathostomata	D_9__Euteleostomi	D_10__Tetrapoda	D_11__Mammalia				0.992409
96a2bd7f8ed8a07838609e6da51dc319	OTU_46	D_0__Eukaryota	D_1__SAR	D_2__Alveolata	D_3__Apicomplexa	D_4__Novel Apicomplexa Class 2	D_5__Gregarinasina gen. sp. 1 KCW-2013	D_6__	D_7__	D_8__	D_9__	D_10__	D_11__	D_12__	D_13__	D_14__	0.999623
f8b337276172a5bc3b2a06f154963ab8	OTU_47	D_0__Eukaryota	D_1__Opisthokonta	D_2__Holozoa	D_3__Metazoa (Animalia)	D_4__Eumetazoa	D_5__Bilateria	D_6__Arthropoda	D_7__Crustacea	D_8__Maxillopoda	D_9__Copepoda	D_10__Calanoida	D_11__uncultured eukaryote	D_12__	D_13__	D_14__	0.983488
722b10075df446996fe9776183fe4d88	OTU_48	D_0__Eukaryota															1
b36087bd0c97945325c750e8e3497fab	OTU_49	D_0__Eukaryota	D_1__SAR	D_2__Stramenopiles	D_3__MAST-3	D_4__MAST-3C	D_5__uncultured eukaryote	D_6__	D_7__	D_8__	D_9__	D_10__	D_11__	D_12__	D_13__	D_14__	0.999752
1d634dc438e390a4d653fc97f3bdc5df	OTU_50	D_0__Eukaryota	D_1__SAR	D_2__Alveolata	D_3__Dinoflagellata	D_4__Dinophyceae	D_5__Gymnodiniphycidae										0.7771
2aac586f2e70d1ebda1d41570f7e4bf3	OTU_51	D_0__Eukaryota	D_1__SAR	D_2__Alveolata	D_3__Apicomplexa	D_4__Novel Apicomplexa Class 2	D_5__Gregarinasina gen. sp. 1 KCW-2013	D_6__	D_7__	D_8__	D_9__	D_10__	D_11__	D_12__	D_13__	D_14__	0.826766
0722d37fec05a8c9d1c4901355578af3	OTU_52	D_0__Eukaryota	D_1__Opisthokonta	D_2__Holozoa	D_3__Metazoa (Animalia)	D_4__Eumetazoa	D_5__Bilateria	D_6__Xenacoelomorpha	D_7__Acoelomorpha	D_8__Acoela	D_9__Atriofronta polyvacuola	D_10__	D_11__	D_12__	D_13__	D_14__	1
6f46e3962aa6e3b51b95055185adb035	OTU_53	D_0__Eukaryota															1
4c024e9ef2d56737a7ab7f250942d2f7	OTU_54	D_0__Eukaryota	D_1__Opisthokonta	D_2__Holozoa	D_3__Metazoa (Animalia)	D_4__Eumetazoa	D_5__Bilateria	D_6__Arthropoda	D_7__Crustacea	D_8__Maxillopoda	D_9__Copepoda	D_10__Poecilostomatoida	D_11__uncultured eukaryote	D_12__	D_13__	D_14__	1
99f1032f27456dac95912cdfd2625a86	OTU_55	D_0__Eukaryota	D_1__Opisthokonta														0.950371
06419d18f26d2c3970d1f9bf018d56c9	OTU_56	D_0__Eukaryota	D_1__Opisthokonta	D_2__Holozoa	D_3__Metazoa (Animalia)	D_4__Eumetazoa	D_5__Bilateria	D_6__Chordata	D_7__Tunicata	D_8__Appendicularia	D_9__Copelata	D_10__Oikopleuridae	D_11__uncultured eukaryote	D_12__	D_13__	D_14__	0.997015
cc2f8e391cc24cd809d97b13a14ab217	OTU_57	D_0__Eukaryota	D_1__Opisthokonta	D_2__Holozoa	D_3__Metazoa (Animalia)	D_4__Porifera	D_5__Demospongiae	D_6__Suberitida	D_7__Terpios aploos	D_8__	D_9__	D_10__	D_11__	D_12__	D_13__	D_14__	0.999998
e9995cd9fb0061c7d97c6199992f300e	OTU_58	D_0__Eukaryota															1
12e5a74df6de34e711070c0caba6767e	OTU_59	D_0__Eukaryota	D_1__Opisthokonta	D_2__Holozoa	D_3__Metazoa (Animalia)	D_4__Eumetazoa	D_5__Bilateria	D_6__Xenacoelomorpha	D_7__Acoelomorpha	D_8__Acoela	D_9__Atriofronta polyvacuola	D_10__	D_11__	D_12__	D_13__	D_14__	1
a0c5b7585dca5ccbeb6312f232a3dfb0	OTU_60	D_0__Eukaryota															1
08ce68de5ceeab53c2aaf5d74c58be6a	OTU_61	D_0__Eukaryota	D_1__Opisthokonta	D_2__Holozoa	D_3__Metazoa (Animalia)	D_4__Eumetazoa	D_5__Bilateria	D_6__Echinodermata	D_7__Echinoidea	D_8__Strongylocentrotus purpuratus	D_9__	D_10__	D_11__	D_12__	D_13__	D_14__	0.997647
0258f4bbe8e25b2de93192231c834efa	OTU_62	D_0__Eukaryota	D_1__Opisthokonta	D_2__Holozoa	D_3__Metazoa (Animalia)	D_4__Eumetazoa	D_5__Bilateria	D_6__Chordata	D_7__Tunicata	D_8__Appendicularia	D_9__Copelata	D_10__Oikopleuridae	D_11__uncultured metazoan	D_12__	D_13__	D_14__	0.932177
c4eccbcc8c278410e5e9e6267ee2a8aa	OTU_63	D_0__Eukaryota															1
7aa074d0f654ce07badbfd4d080fec5d	OTU_64	D_0__Eukaryota	D_1__Opisthokonta	D_2__Holozoa	D_3__Metazoa (Animalia)	D_4__Eumetazoa	D_5__Bilateria	D_6__Chordata	D_7__Tunicata	D_8__Appendicularia	D_9__Copelata	D_10__Oikopleuridae	D_11__uncultured metazoan	D_12__	D_13__	D_14__	0.999995
5f81202c6ed959e186db6a4185b15056	OTU_65	D_0__Eukaryota															1
cda0f94b11019ebbc5ede4ef26a53d56	OTU_66	D_0__Eukaryota	D_1__Opisthokonta	D_2__Holozoa	D_3__Metazoa (Animalia)	D_4__Eumetazoa	D_5__Bilateria	D_6__Arthropoda	D_7__Crustacea	D_8__Maxillopoda	D_9__Copepoda	D_10__Cyclopoida	D_11__Cyclopina gracilis	D_12__	D_13__	D_14__	0.905267
fe64b7fa29f623efc2073187fcf1e319	OTU_67	D_0__Eukaryota	D_1__Opisthokonta	D_2__Holozoa	D_3__Metazoa (Animalia)	D_4__Porifera	D_5__Demospongiae	D_6__Haplosclerida	D_7__Haliclona amboinensis	D_8__	D_9__	D_10__	D_11__	D_12__	D_13__	D_14__	0.999961
9ad3dd885d56ce61fe1794cfde5cf292	OTU_68	D_0__Eukaryota	D_1__SAR	D_2__Alveolata													0.998223
126fa166c58279418ea9b4921cdd5835	OTU_69	D_0__Eukaryota	D_1__Opisthokonta														0.959239
8ace966310db9b90c612744400e81d69	OTU_70	D_0__Eukaryota	D_1__SAR	D_2__Alveolata	D_3__Apicomplexa	D_4__Conoidasida	D_5__Coccidia	D_6__Eimeriorina	D_7__Eimeria	D_8__Eimeria acervulina	D_9__	D_10__	D_11__	D_12__	D_13__	D_14__	0.999944
b239f5ced91c39e5013ce858350082f0	OTU_71	D_0__Eukaryota	D_1__Archaeplastida	D_2__Chloroplastida	D_3__Chlorophyta	D_4__Clade VII	D_5__Subclade A	D_6__uncultured eukaryote	D_7__	D_8__	D_9__	D_10__	D_11__	D_12__	D_13__	D_14__	1
e10d38a413cd75db3c9484bf78a79534	OTU_72	D_0__Eukaryota	D_1__Opisthokonta	D_2__Holozoa	D_3__Metazoa (Animalia)	D_4__Eumetazoa	D_5__Bilateria	D_6__Arthropoda	D_7__Crustacea	D_8__Maxillopoda	D_9__Copepoda	D_10__Siphonostomatoida	D_11__Orecturus sp. New Caledonia-RJH-2004	D_12__	D_13__	D_14__	0.853067
f32cade589b4ae456d9f35c33ed9e250	OTU_73	D_0__Eukaryota	D_1__Opisthokonta	D_2__Holozoa	D_3__Metazoa (Animalia)	D_4__Eumetazoa	D_5__Bilateria	D_6__Mollusca	D_7__Bivalvia	D_8__Pteriomorphia	D_9__Mytiloida						0.999888
334bda51241d993f8ff8874ecd5d5926	OTU_74	D_0__Eukaryota	D_1__Opisthokonta	D_2__Holozoa	D_3__Metazoa (Animalia)	D_4__Eumetazoa	D_5__Bilateria	D_6__Arthropoda	D_7__Crustacea	D_8__Maxillopoda	D_9__Copepoda	D_10__uncultured eukaryote	D_11__	D_12__	D_13__	D_14__	0.989763
ded39488628e7ee625a76ea239c652b4	OTU_75	D_0__Eukaryota	D_1__Opisthokonta	D_2__Nucletmycea	D_3__Fungi	D_4__Dikarya	D_5__Basidiomycota	D_6__Agaricomycotina	D_7__Agaricomycetes	D_8__Agaricales							0.835239
8a69ef7d1961345c8c832383f3683a77	OTU_76	D_0__Eukaryota	D_1__Opisthokonta	D_2__Holozoa	D_3__Metazoa (Animalia)	D_4__Eumetazoa	D_5__Bilateria	D_6__Arthropoda	D_7__Crustacea	D_8__Maxillopoda	D_9__Copepoda	D_10__Calanoida	D_11__uncultured eukaryote	D_12__	D_13__	D_14__	0.999741
d7e915be97685c2ea24fbf30bc61e057	OTU_77	D_0__Eukaryota	D_1__SAR	D_2__Stramenopiles	D_3__Ochrophyta	D_4__Diatomea	D_5__Coscinodiscophytina	D_6__Fragilariales									0.846927
4ff6e37214fcb3404c13f9d35b7486fe	OTU_78	D_0__Eukaryota															1
d6ca3688968012739af14979fc5d8314	OTU_79	D_0__Eukaryota															1
70f2355e0e8fa768a2d5ac68669b8cd9	OTU_80	D_0__Eukaryota	D_1__Opisthokonta	D_2__Holozoa	D_3__Metazoa (Animalia)	D_4__Eumetazoa	D_5__Bilateria	D_6__Arthropoda	D_7__Crustacea	D_8__Maxillopoda	D_9__Copepoda	D_10__Calanoida	D_11__uncultured eukaryote	D_12__	D_13__	D_14__	0.891849
53cc82a0813174d496331428af8882f6	OTU_81	D_0__Eukaryota	D_1__Opisthokonta	D_2__Holozoa	D_3__Metazoa (Animalia)	D_4__Eumetazoa	D_5__Bilateria										0.99998
6e29fd15eba350136138dccd5f04513f	OTU_82	D_0__Eukaryota	D_1__SAR	D_2__Stramenopiles	D_3__MAST-4	D_4__uncultured stramenopile	D_5__	D_6__	D_7__	D_8__	D_9__	D_10__	D_11__	D_12__	D_13__	D_14__	0.994502
1354f7ca448c23e77aa35bce708fb1ba	OTU_83	D_0__Eukaryota	D_1__Opisthokonta	D_2__Holozoa	D_3__Metazoa (Animalia)	D_4__Porifera	D_5__Demospongiae	D_6__Suberitida	D_7__Terpios aploos	D_8__	D_9__	D_10__	D_11__	D_12__	D_13__	D_14__	0.997913
6fa1d8b948fcf59e7c2fb7662eaaaba3	OTU_84	D_0__Eukaryota	D_1__Opisthokonta	D_2__Holozoa	D_3__Metazoa (Animalia)	D_4__Eumetazoa	D_5__Bilateria	D_6__Chordata	D_7__Vertebrata	D_8__Gnathostomata	D_9__Euteleostomi	D_10__Actinopterygii	D_11__Neopterygii				0.925923
4be1f8ce16dc8a30c45e24ceadc20de0	OTU_85	D_0__Eukaryota	D_1__Opisthokonta	D_2__Holozoa	D_3__Metazoa (Animalia)	D_4__Eumetazoa											0.835791
277d1435a903794a72037a03e949aeda	OTU_86	D_0__Eukaryota															1
4f76f8ce021691736331ed22e88b9e7b	OTU_87	D_0__Eukaryota	D_1__SAR	D_2__Rhizaria	D_3__Retaria												1
855e43af267ab6a6817f6ea8b557b9d1	OTU_88	D_0__Eukaryota	D_1__Opisthokonta	D_2__Holozoa	D_3__Metazoa (Animalia)	D_4__Eumetazoa	D_5__Bilateria	D_6__Arthropoda	D_7__Crustacea	D_8__Maxillopoda	D_9__Copepoda	D_10__Cyclopoida					0.923723
cac8c82974e586b857b10888cb83c508	OTU_89	D_0__Eukaryota															1
e65efaabd97257a5e003f8cde25c102e	OTU_90	D_0__Eukaryota															1
d46b45039a84d480081c9d12f0e64926	OTU_91	D_0__Eukaryota	D_1__Opisthokonta	D_2__Holozoa	D_3__Metazoa (Animalia)	D_4__Eumetazoa	D_5__Bilateria	D_6__Arthropoda	D_7__Crustacea	D_8__Maxillopoda	D_9__Copepoda	D_10__Cyclopoida	D_11__uncultured eukaryote	D_12__	D_13__	D_14__	0.999888
45cbaccedd9c89ef578572ac045ff071	OTU_92	D_0__Eukaryota	D_1__Opisthokonta	D_2__Holozoa	D_3__Metazoa (Animalia)	D_4__Porifera	D_5__Demospongiae	D_6__Suberitida	D_7__Terpios aploos	D_8__	D_9__	D_10__	D_11__	D_12__	D_13__	D_14__	0.970795
80b7af71ab83a18c672415b0759b21e0	OTU_93	D_0__Eukaryota	D_1__Incertae Sedis	D_2__Telonema	D_3__Telonema subtile	D_4__	D_5__	D_6__	D_7__	D_8__	D_9__	D_10__	D_11__	D_12__	D_13__	D_14__	0.896293
af2cb8cf5cc50980d3c53fd51e3693d8	OTU_94	D_0__Eukaryota	D_1__SAR	D_2__Stramenopiles	D_3__Ochrophyta	D_4__Diatomea	D_5__Bacillariophytina	D_6__Bacillariophyceae	D_7__Navicula								0.734801
093d26cb65f77bb02650e11561bea626	OTU_95	D_0__Eukaryota	D_1__Opisthokonta	D_2__Holozoa	D_3__Metazoa (Animalia)	D_4__Eumetazoa	D_5__Bilateria	D_6__Chordata	D_7__Vertebrata	D_8__Gnathostomata	D_9__Euteleostomi	D_10__Actinopterygii	D_11__Neopterygii	D_12__Teleostei			0.963626
78f63e3c7d82712a7d7cb2f07e08ead8	OTU_96	D_0__Eukaryota	D_1__SAR	D_2__Stramenopiles	D_3__Ochrophyta	D_4__Diatomea	D_5__Bacillariophytina	D_6__Bacillariophyceae									0.992085
b703d1273db5cd0b02d66cfa2cf48d22	OTU_97	D_0__Eukaryota	D_1__SAR	D_2__Alveolata													0.995561
74473fa7fd3ae6c234dddac22a0a693d	OTU_98	D_0__Eukaryota	D_1__Opisthokonta	D_2__Nucletmycea	D_3__Fungi	D_4__Dikarya	D_5__Basidiomycota	D_6__Agaricomycotina	D_7__Agaricomycetes	D_8__Agaricales	D_9__Schizophyllaceae	D_10__Schizophyllum	D_11__Schizophyllum commune	D_12__	D_13__	D_14__	0.951297
b058f7652aa090ef670983f3d93d2823	OTU_99	D_0__Eukaryota	D_1__SAR	D_2__Stramenopiles	D_3__Ochrophyta	D_4__Diatomea	D_5__Bacillariophytina	D_6__Bacillariophyceae									0.975605
eb70985d865a28cbd73218abf48d4f14	OTU_100	D_0__Eukaryota	D_1__Opisthokonta	D_2__Holozoa	D_3__Metazoa (Animalia)	D_4__Eumetazoa	D_5__Bilateria	D_6__Gastrotricha	D_7__Chaetonotida	D_8__Halichaetonotus schromi	D_9__	D_10__	D_11__	D_12__	D_13__	D_14__	0.806672
f256dddbbbecf213bc2346218bbef0e1	OTU_101	D_0__Eukaryota	D_1__Opisthokonta	D_2__Holozoa	D_3__Metazoa (Animalia)	D_4__Eumetazoa	D_5__Bilateria	D_6__Xenacoelomorpha	D_7__Acoelomorpha	D_8__Acoela	D_9__Atriofronta polyvacuola	D_10__	D_11__	D_12__	D_13__	D_14__	1
194615fb44d953870ef0fb08b199e5f6	OTU_102	D_0__Eukaryota	D_1__Opisthokonta	D_2__Holozoa	D_3__Metazoa (Animalia)	D_4__Eumetazoa	D_5__Bilateria	D_6__Arthropoda	D_7__Crustacea	D_8__Maxillopoda	D_9__Copepoda	D_10__Harpacticoida	D_11__Diarthrodes sp. 1 New Caledonia-RJH-2007	D_12__	D_13__	D_14__	0.967701
6f99be91593a9df314f0f5b303a3cc67	OTU_103	D_0__Eukaryota	D_1__SAR	D_2__Alveolata	D_3__Dinoflagellata	D_4__Dinophyceae											0.903676
d41afd7606a86b7606788f74759fcb1e	OTU_104	D_0__Eukaryota	D_1__Haptophyta	D_2__Prymnesiophyceae	D_3__Prymnesiales	D_4__Chrysochromulina	D_5__uncultured marine picoeukaryote	D_6__	D_7__	D_8__	D_9__	D_10__	D_11__	D_12__	D_13__	D_14__	0.999999
91e68bde561d9844545b2b0ef25c3ef9	OTU_105	D_0__Eukaryota															1
a7a0b7fb9a5c38a8ae7d50ad12f3c7fb	OTU_106	D_0__Eukaryota	D_1__SAR	D_2__Alveolata	D_3__Protalveolata	D_4__Syndiniales	D_5__uncultured Duboscquella	D_6__	D_7__	D_8__	D_9__	D_10__	D_11__	D_12__	D_13__	D_14__	0.995084
9a47ab2dce0b365df0e15b4ad7b0ca56	OTU_107	D_0__Eukaryota															1
9ff4b91286cd5682d2b602ce82182ab5	OTU_108	D_0__Eukaryota	D_1__SAR	D_2__Alveolata	D_3__Protalveolata	D_4__Syndiniales											0.762541
b5046c77ee755988f85bb24a2b2faaf3	OTU_109	D_0__Eukaryota															1
16f3a0c5927e9c96ddb73e15c9d5ccf5	OTU_110	D_0__Eukaryota	D_1__SAR	D_2__Rhizaria	D_3__Retaria	D_4__Foraminifera	D_5__Globothalamea	D_6__Rotaliida									0.999991
33ec6f53f099e8bb825f461f29a42aa8	OTU_111	D_0__Eukaryota	D_1__SAR	D_2__Rhizaria	D_3__Retaria	D_4__RAD B	D_5__uncultured Polycystinea	D_6__	D_7__	D_8__	D_9__	D_10__	D_11__	D_12__	D_13__	D_14__	0.999999
3282f38b567b98353607d60a96fa6368	OTU_112	D_0__Eukaryota	D_1__Opisthokonta	D_2__Holozoa	D_3__Metazoa (Animalia)	D_4__Eumetazoa	D_5__Bilateria	D_6__Arthropoda	D_7__Crustacea	D_8__Maxillopoda	D_9__Copepoda	D_10__uncultured eukaryote	D_11__	D_12__	D_13__	D_14__	0.971454
b9931d30b68f8ef239180ae566e49905	OTU_113	D_0__Eukaryota	D_1__Opisthokonta	D_2__Holozoa	D_3__Metazoa (Animalia)	D_4__Eumetazoa	D_5__Bilateria	D_6__Annelida	D_7__uncultured metazoan	D_8__	D_9__	D_10__	D_11__	D_12__	D_13__	D_14__	0.999355
f214cd63f64bf7e2f0675272b5859eed	OTU_114	D_0__Eukaryota	D_1__Opisthokonta	D_2__Nucletmycea	D_3__Fungi												0.99997
e0978f0d21eed94eeb18ad2be230e054	OTU_115	D_0__Eukaryota	D_1__Opisthokonta	D_2__Holozoa	D_3__Metazoa (Animalia)	D_4__Eumetazoa	D_5__Bilateria	D_6__Xenacoelomorpha	D_7__Acoelomorpha	D_8__Acoela							0.959885
25c6a1557ad98f6bdf85566c5bd3e72c	OTU_116	D_0__Eukaryota	D_1__SAR	D_2__Alveolata	D_3__Dinoflagellata	D_4__Dinophyceae	D_5__Gymnodiniphycidae										0.999029
292a02925111a65e53fa10d1dc4d52a5	OTU_117	D_0__Eukaryota															1
c37bd9469e106d81a589b4a2fdc30778	OTU_118	D_0__Eukaryota	D_1__Opisthokonta	D_2__Holozoa	D_3__Metazoa (Animalia)	D_4__Eumetazoa	D_5__Bilateria										0.731723
afa8ebb854c6f59e664ce31adb09f32b	OTU_119	D_0__Eukaryota	D_1__Opisthokonta	D_2__Nucletmycea	D_3__Fungi	D_4__Dikarya	D_5__Ascomycota	D_6__Pezizomycotina	D_7__Eurotiomycetes	D_8__Eurotiales	D_9__Aspergillaceae	D_10__Aspergillus	D_11__Aspergillus penicillioides	D_12__	D_13__	D_14__	0.993062
cf237ec393f28a0f1a8781ee2002361e	OTU_120	D_0__Eukaryota															1
aa8fa2fcf0ce38ddaae09be11a263876	OTU_121	D_0__Eukaryota															1
f96b8508558e997b77d4c1193d2cd70b	OTU_122	D_0__Eukaryota	D_1__Opisthokonta	D_2__Holozoa	D_3__Metazoa (Animalia)	D_4__Porifera	D_5__Demospongiae										0.726097
3570a2dd74c3ea68669ab2763fdac53f	OTU_123	D_0__Eukaryota	D_1__Opisthokonta	D_2__Holozoa	D_3__Metazoa (Animalia)	D_4__Eumetazoa	D_5__Bilateria	D_6__Annelida	D_7__Polychaeta	D_8__Scolecida	D_9__Spionida	D_10__Boccardiella ligerica	D_11__	D_12__	D_13__	D_14__	0.999732
1684f41a1a265b7bda977ed36be276df	OTU_124	D_0__Eukaryota	D_1__Archaeplastida	D_2__Chloroplastida	D_3__Chlorophyta	D_4__Chlorodendrophyceae	D_5__Chlorodendrales	D_6__Tetraselmis									1
a7dda8552dbfa2bb82f5243834d90f6e	OTU_125	D_0__Eukaryota	D_1__SAR	D_2__Stramenopiles	D_3__Ochrophyta	D_4__Diatomea	D_5__Bacillariophytina	D_6__Bacillariophyceae	D_7__Fragilariopsis	D_8__uncultured eukaryote	D_9__	D_10__	D_11__	D_12__	D_13__	D_14__	0.786752
a57d6ec08d34af420203d45a99b15d7b	OTU_126	D_0__Eukaryota	D_1__Opisthokonta	D_2__Holozoa	D_3__Metazoa (Animalia)	D_4__Eumetazoa	D_5__Bilateria	D_6__Chordata	D_7__Tunicata	D_8__Ascidiacea	D_9__Stolidobranchia	D_10__Pyura gangelion	D_11__	D_12__	D_13__	D_14__	0.977364
4c8f952b0a8849de02bad30f37bec7bf	OTU_127	D_0__Eukaryota	D_1__SAR	D_2__Alveolata	D_3__Dinoflagellata	D_4__Dinophyceae	D_5__Prorocentrales	D_6__Prorocentrum	D_7__Prorocentrum dentatum	D_8__	D_9__	D_10__	D_11__	D_12__	D_13__	D_14__	0.99918
777fcd3e67121b1e8c11f1f3faf14bcf	OTU_128	D_0__Eukaryota	D_1__Opisthokonta	D_2__Nucletmycea	D_3__Fungi	D_4__Dikarya	D_5__Basidiomycota	D_6__Agaricomycotina	D_7__Agaricomycetes	D_8__Boletales	D_9__Serpulaceae	D_10__Serpula	D_11__Serpula similis	D_12__	D_13__	D_14__	0.99273
841ee0bd11e913f3b3a71dc2239bd5fa	OTU_129	D_0__Eukaryota															1
9c745abb61c01676fc8bc4d8dd5bf060	OTU_130	D_0__Eukaryota	D_1__Archaeplastida	D_2__Chloroplastida	D_3__Chlorophyta	D_4__Mamiellophyceae	D_5__Mamiellales	D_6__Bathycoccus	D_7__Bathycoccus prasinos	D_8__	D_9__	D_10__	D_11__	D_12__	D_13__	D_14__	0.881625
cf07ae5d599b7121784e7baff04b621b	OTU_131	D_0__Eukaryota	D_1__Opisthokonta	D_2__Holozoa	D_3__Metazoa (Animalia)	D_4__Eumetazoa	D_5__Bilateria	D_6__Annelida	D_7__Polychaeta	D_8__Scolecida	D_9__Opheliidae	D_10__Euzonus ezoensis	D_11__	D_12__	D_13__	D_14__	0.997917
046a2e6c1cbac607a55e0293f7fdcc38	OTU_132	D_0__Eukaryota															1
2e45c41bffe08b45bc59f22f369ec6ad	OTU_133	D_0__Eukaryota	D_1__Opisthokonta	D_2__Holozoa	D_3__Metazoa (Animalia)	D_4__Eumetazoa	D_5__Bilateria	D_6__Arthropoda	D_7__Crustacea	D_8__Maxillopoda	D_9__Copepoda						0.870673
637073e653713f7f1f1eb5bb6f98b9b9	OTU_134	D_0__Eukaryota	D_1__SAR	D_2__Stramenopiles	D_3__Ochrophyta	D_4__Diatomea	D_5__Coscinodiscophytina	D_6__Rhizosolenids	D_7__Leptocylindrus	D_8__Leptocylindrus danicus	D_9__	D_10__	D_11__	D_12__	D_13__	D_14__	1
1aa9e2ef771627ba62260bc52cf67a05	OTU_135	D_0__Eukaryota	D_1__Opisthokonta	D_2__Holozoa	D_3__Metazoa (Animalia)	D_4__Eumetazoa	D_5__Bilateria	D_6__Annelida	D_7__Polychaeta	D_8__Palpata	D_9__Phyllodocida	D_10__Kefersteinia cirrata	D_11__	D_12__	D_13__	D_14__	0.912854
131aed55d563361c22730eb1ffc9f3ff	OTU_136	D_0__Eukaryota	D_1__SAR	D_2__Alveolata	D_3__Protalveolata	D_4__Syndiniales	D_5__Syndiniales Group I	D_6__uncultured eukaryote	D_7__	D_8__	D_9__	D_10__	D_11__	D_12__	D_13__	D_14__	0.920118
599acc362ec14e2ff9750d9a63ee9297	OTU_137	D_0__Eukaryota	D_1__Opisthokonta	D_2__Holozoa	D_3__Metazoa (Animalia)	D_4__Eumetazoa	D_5__Bilateria	D_6__Chordata	D_7__Tunicata	D_8__Ascidiacea	D_9__Stolidobranchia	D_10__Molgula citrina	D_11__	D_12__	D_13__	D_14__	0.991743
e3f6187b3d8bc92789e002c4d4631567	OTU_138	D_0__Eukaryota	D_1__SAR	D_2__Alveolata	D_3__Dinoflagellata	D_4__Dinophyceae	D_5__Gymnodiniphycidae	D_6__Gymnodinium clade	D_7__Erythropsidinium								0.773004
72e5c2936daf8a249271790e32ec5116	OTU_139	D_0__Eukaryota	D_1__Archaeplastida	D_2__Chloroplastida	D_3__Chlorophyta	D_4__Mamiellophyceae	D_5__Mamiellales	D_6__Micromonas	D_7__uncultured eukaryote	D_8__	D_9__	D_10__	D_11__	D_12__	D_13__	D_14__	0.987962
70336b93e428d2326affe50c1bd1b559	OTU_140	D_0__Eukaryota	D_1__SAR	D_2__Alveolata	D_3__Dinoflagellata	D_4__Dinophyceae											0.970271
7bf3395a832cfcc18138874a7851b30c	OTU_141	D_0__Eukaryota	D_1__SAR	D_2__Rhizaria	D_3__Retaria	D_4__RAD A	D_5__uncultured eukaryote	D_6__	D_7__	D_8__	D_9__	D_10__	D_11__	D_12__	D_13__	D_14__	0.94345
b66c546b58a24b04ba2669a9a1149234	OTU_142	D_0__Eukaryota															1
cd0fddf8559170ad4baa0baa46f4db4a	OTU_143	D_0__Eukaryota	D_1__Opisthokonta	D_2__Holozoa	D_3__Metazoa (Animalia)	D_4__Eumetazoa	D_5__Bilateria	D_6__Annelida	D_7__Polychaeta	D_8__Palpata	D_9__Phyllodocida	D_10__Sphaerosyllis hirsuta	D_11__	D_12__	D_13__	D_14__	0.913741
0f9cca677bf9f05d500338e4344356af	OTU_144	D_0__Eukaryota	D_1__SAR	D_2__Alveolata	D_3__Dinoflagellata	D_4__Incertae Sedis	D_5__Haplozoon	D_6__uncultured eukaryote	D_7__	D_8__	D_9__	D_10__	D_11__	D_12__	D_13__	D_14__	0.963181
a4660a2e5301c2acd9ec3568445a1aa4	OTU_145	D_0__Eukaryota	D_1__Opisthokonta	D_2__Holozoa	D_3__Metazoa (Animalia)	D_4__Eumetazoa	D_5__Bilateria	D_6__Annelida	D_7__Polychaeta	D_8__Scolecida	D_9__Spionida						0.999997
3ed3600989372665b604e5c9545c73e8	OTU_146	D_0__Eukaryota	D_1__Opisthokonta	D_2__Holozoa	D_3__Metazoa (Animalia)	D_4__Eumetazoa	D_5__Bilateria	D_6__uncultured	D_7__uncultured eukaryote	D_8__	D_9__	D_10__	D_11__	D_12__	D_13__	D_14__	0.879144
e3292d6eb99a56d273ec275dc9ca7671	OTU_147	D_0__Eukaryota	D_1__SAR	D_2__Alveolata	D_3__Protalveolata	D_4__Syndiniales	D_5__Duboscquella	D_6__uncultured eukaryote	D_7__	D_8__	D_9__	D_10__	D_11__	D_12__	D_13__	D_14__	0.999857
480e11709b2728e65572ffe4601cb70b	OTU_148	D_0__Eukaryota	D_1__SAR	D_2__Alveolata	D_3__Protalveolata	D_4__Syndiniales											0.703209
b4516dbe0130f4ff53180fe7f7e1c4dd	OTU_149	D_0__Eukaryota	D_1__SAR	D_2__Alveolata	D_3__Dinoflagellata	D_4__Dinophyceae	D_5__Gymnodiniphycidae	D_6__Ptychodiscus	D_7__uncultured eukaryote	D_8__	D_9__	D_10__	D_11__	D_12__	D_13__	D_14__	0.984026
9914d1d30791373678ba36618327d74f	OTU_150	D_0__Eukaryota															1
1e5ce0ed51e3d827258d456f9a1d9445	OTU_151	D_0__Eukaryota	D_1__SAR	D_2__Alveolata	D_3__Dinoflagellata												0.968938
363727d815f898929e21efc0f4c3a704	OTU_152	D_0__Eukaryota	D_1__Incertae Sedis	D_2__Telonema	D_3__uncultured eukaryote	D_4__	D_5__	D_6__	D_7__	D_8__	D_9__	D_10__	D_11__	D_12__	D_13__	D_14__	0.996967
ff93b0d03d4e3063bb9cc1dcc6ff8a5e	OTU_153	D_0__Eukaryota	D_1__Opisthokonta	D_2__Holozoa	D_3__Metazoa (Animalia)	D_4__Eumetazoa	D_5__Bilateria	D_6__Arthropoda	D_7__Crustacea	D_8__Maxillopoda	D_9__Copepoda	D_10__Cyclopoida	D_11__Cyclopina gracilis	D_12__	D_13__	D_14__	0.900493
353ae7bd38c1a57cfdf82f01a4adf76f	OTU_154	D_0__Eukaryota	D_1__SAR	D_2__Stramenopiles	D_3__Ochrophyta	D_4__Pelagophyceae	D_5__uncultured eukaryote	D_6__	D_7__	D_8__	D_9__	D_10__	D_11__	D_12__	D_13__	D_14__	0.999889
22a6432bbb6e7c253dc68ed6000602e6	OTU_155	D_0__Eukaryota	D_1__SAR	D_2__Alveolata													0.876119
1b6fc72ec7cdd5234f31dc073191e8bb	OTU_156	D_0__Eukaryota	D_1__Opisthokonta	D_2__Holozoa	D_3__Metazoa (Animalia)	D_4__Eumetazoa	D_5__Bilateria	D_6__Annelida	D_7__Polychaeta	D_8__Palpata	D_9__Phyllodocida	D_10__Kefersteinia cirrata	D_11__	D_12__	D_13__	D_14__	0.859174
1df7c7230b01e01365fe8c22c50e9323	OTU_157	D_0__Eukaryota	D_1__Picozoa	D_2__Picomonadida	D_3__Picomonadidae	D_4__Picomonas	D_5__uncultured eukaryote	D_6__	D_7__	D_8__	D_9__	D_10__	D_11__	D_12__	D_13__	D_14__	0.838688
fe732fec8b5b4d346453d34feeb0be0c	OTU_158	D_0__Eukaryota	D_1__Opisthokonta	D_2__Holozoa	D_3__Metazoa (Animalia)	D_4__Eumetazoa	D_5__Bilateria	D_6__Arthropoda	D_7__Crustacea	D_8__Maxillopoda	D_9__Copepoda	D_10__Harpacticoida					0.75638
645c96442f37330bc32a2963aec3d86b	OTU_159	D_0__Eukaryota															1
8681aff09ad4cf09b32cd0acd2864f0b	OTU_160	D_0__Eukaryota	D_1__SAR	D_2__Rhizaria	D_3__Retaria	D_4__uncultured	D_5__uncultured marine eukaryote	D_6__	D_7__	D_8__	D_9__	D_10__	D_11__	D_12__	D_13__	D_14__	0.716684
af21d97d96cd65af26bc355b72107fd9	OTU_161	D_0__Eukaryota	D_1__SAR	D_2__Stramenopiles	D_3__MAST-1	D_4__MAST-1D	D_5__uncultured stramenopile	D_6__	D_7__	D_8__	D_9__	D_10__	D_11__	D_12__	D_13__	D_14__	0.999704
573e766a026a45abcee13bffb13819e5	OTU_162	D_0__Eukaryota															1
46a7445d5c84381832d5e4c623e3605a	OTU_163	D_0__Eukaryota	D_1__SAR	D_2__Stramenopiles													0.996967
0c21acac4063e4cfe181590bc8eb11fe	OTU_164	D_0__Eukaryota	D_1__SAR	D_2__Alveolata	D_3__Dinoflagellata	D_4__Dinophyceae	D_5__Gymnodiniphycidae										0.797419
ff5e9218c35a7ab7f7c3e2934f5bdffa	OTU_165	D_0__Eukaryota	D_1__SAR	D_2__Stramenopiles	D_3__Ochrophyta	D_4__Diatomea	D_5__Bacillariophytina	D_6__Bacillariophyceae	D_7__Catenulaceae sp. 97	D_8__	D_9__	D_10__	D_11__	D_12__	D_13__	D_14__	0.902412
5f7e2658e7ab9413de2bf08a815f8c47	OTU_166	D_0__Eukaryota	D_1__SAR	D_2__Alveolata	D_3__Protalveolata	D_4__Syndiniales	D_5__Syndiniales Group I	D_6__uncultured eukaryote	D_7__	D_8__	D_9__	D_10__	D_11__	D_12__	D_13__	D_14__	0.996979
3a78dd323a6cb3328636f6b777791d52	OTU_167	D_0__Eukaryota	D_1__SAR	D_2__Stramenopiles	D_3__MAST-7	D_4__MAST-7B	D_5__uncultured marine eukaryote	D_6__	D_7__	D_8__	D_9__	D_10__	D_11__	D_12__	D_13__	D_14__	0.999935
f842cb47d68db70d167d3580c11023a5	OTU_168	D_0__Eukaryota	D_1__Opisthokonta	D_2__Holozoa	D_3__Metazoa (Animalia)	D_4__Eumetazoa	D_5__Bilateria	D_6__Annelida	D_7__Polychaeta	D_8__Scolecida	D_9__Terebellida	D_10__Lysilla sp. THS-2012	D_11__	D_12__	D_13__	D_14__	0.764224
1f8d0dcf432a407186dcb8b3a76fab99	OTU_169	D_0__Eukaryota	D_1__SAR	D_2__Alveolata	D_3__Protalveolata	D_4__Syndiniales	D_5__Syndiniales Group I	D_6__uncultured Duboscquella	D_7__	D_8__	D_9__	D_10__	D_11__	D_12__	D_13__	D_14__	1
c9f6341bea6e5cb314de37dc7506701d	OTU_170	D_0__Eukaryota															1
5c54c6f4578c5940a61be766caed3105	OTU_171	D_0__Eukaryota															1
389ba1c56b6afdccc3f624a36f2552fa	OTU_172	D_0__Eukaryota	D_1__SAR	D_2__Stramenopiles	D_3__MAST-4	D_4__uncultured stramenopile	D_5__	D_6__	D_7__	D_8__	D_9__	D_10__	D_11__	D_12__	D_13__	D_14__	1
14a018aed44dbed07b29335b17143298	OTU_173	D_0__Eukaryota	D_1__SAR	D_2__Alveolata	D_3__Protalveolata	D_4__Syndiniales	D_5__Syndiniales Group I	D_6__uncultured eukaryote	D_7__	D_8__	D_9__	D_10__	D_11__	D_12__	D_13__	D_14__	0.977206
d5374d4685f394b5980ba7c1164f2ad2	OTU_174	D_0__Eukaryota	D_1__SAR	D_2__Rhizaria	D_3__Retaria	D_4__RAD B	D_5__Spumellarian radiolarian 7017	D_6__	D_7__	D_8__	D_9__	D_10__	D_11__	D_12__	D_13__	D_14__	0.99984
c26f02ce7bfe66ee9493593a9dce124c	OTU_175	D_0__Eukaryota	D_1__SAR	D_2__Rhizaria	D_3__Retaria	D_4__Acantharia											0.9052
608b6c9ec8b8a758ad1caa95b95ddc8e	OTU_176	D_0__Eukaryota	D_1__Opisthokonta	D_2__Holozoa	D_3__Metazoa (Animalia)	D_4__Eumetazoa	D_5__Bilateria	D_6__Arthropoda	D_7__Crustacea	D_8__Ostracoda	D_9__Podocopa	D_10__Podocopida	D_11__Xestoleberis hanaii	D_12__	D_13__	D_14__	0.99986
f154607f18e0c2eecbc008e7fc450317	OTU_177	D_0__Eukaryota	D_1__Opisthokonta	D_2__Holozoa	D_3__Metazoa (Animalia)	D_4__Eumetazoa	D_5__Bilateria	D_6__Annelida	D_7__Polychaeta	D_8__Palpata	D_9__Phyllodocida	D_10__Sphaerosyllis hirsuta	D_11__	D_12__	D_13__	D_14__	0.957853
58dfb6b38c1233f224f61aa3075a6652	OTU_178	D_0__Eukaryota	D_1__Opisthokonta														0.930753
40f04b1c0eee8d09e056ecdc31d9e2fe	OTU_179	D_0__Eukaryota	D_1__SAR	D_2__Stramenopiles	D_3__Ochrophyta	D_4__Diatomea	D_5__Bacillariophytina	D_6__Bacillariophyceae	D_7__Navicula	D_8__uncultured marine eukaryote	D_9__	D_10__	D_11__	D_12__	D_13__	D_14__	0.887195
0cf87b496de8585dc8dec8de8f1fc76e	OTU_180	D_0__Eukaryota	D_1__SAR	D_2__Alveolata	D_3__Dinoflagellata	D_4__Dinophyceae											0.887766
0970fbc5e12183ed74e46732244711a2	OTU_181	D_0__Eukaryota															1
4f98963b63fdf02be5ee37e5e20b0630	OTU_182	D_0__Eukaryota	D_1__Opisthokonta	D_2__Holozoa	D_3__Metazoa (Animalia)	D_4__Porifera	D_5__Demospongiae	D_6__Suberitida	D_7__Terpios aploos	D_8__	D_9__	D_10__	D_11__	D_12__	D_13__	D_14__	0.998007
f4315a7a15b0530cc7223f6882a3510d	OTU_183	D_0__Eukaryota	D_1__Cryptophyceae	D_2__Cryptomonadales													0.9998
cccb4667f9bd6ba7ac19cc8ecf823e69	OTU_184	D_0__Eukaryota	D_1__Opisthokonta	D_2__Holozoa	D_3__Metazoa (Animalia)	D_4__Eumetazoa	D_5__Bilateria	D_6__Chordata	D_7__Vertebrata	D_8__Gnathostomata	D_9__Euteleostomi	D_10__Actinopterygii	D_11__Neopterygii	D_12__Teleostei			0.964615
9b4227ba37427faa685aa324577ac6f8	OTU_185	D_0__Eukaryota	D_1__Opisthokonta	D_2__Nucletmycea	D_3__Fungi	D_4__Dikarya	D_5__Basidiomycota	D_6__Agaricomycotina	D_7__Agaricomycetes	D_8__Agaricales							0.797908
1e8d8aacdb853eeb9597ea7671da97d9	OTU_186	D_0__Eukaryota	D_1__Haptophyta	D_2__Prymnesiophyceae	D_3__Prymnesiales	D_4__OLI16029	D_5__unidentified prymnesiophyte clone OLI16108	D_6__	D_7__	D_8__	D_9__	D_10__	D_11__	D_12__	D_13__	D_14__	0.999987
8d6ea2130b635720b7b5acabcb363c63	OTU_187	D_0__Eukaryota	D_1__SAR	D_2__Stramenopiles													1
bf6f45c7b294d3e81d3ff236aff3de19	OTU_188	D_0__Eukaryota															1
4ff83ffd50a9529c376fa50f93cc9d4f	OTU_189	D_0__Eukaryota	D_1__Opisthokonta	D_2__Holozoa	D_3__Metazoa (Animalia)	D_4__Eumetazoa	D_5__Cnidaria	D_6__Anthozoa	D_7__Hexacorallia	D_8__Scleractinia							0.999957
612212c787f27ed2467d0f772964c1f5	OTU_190	D_0__Eukaryota	D_1__SAR	D_2__Alveolata													0.999996
de720d3102e2c6a7f07b90a6f12ad6f4	OTU_191	D_0__Eukaryota	D_1__Cryptophyceae	D_2__Kathablepharidae	D_3__Leucocryptos	D_4__uncultured eukaryote	D_5__	D_6__	D_7__	D_8__	D_9__	D_10__	D_11__	D_12__	D_13__	D_14__	0.999952
63089b182f46dbd3eb26cae8d0f7fad0	OTU_192	D_0__Eukaryota	D_1__SAR	D_2__Alveolata	D_3__Dinoflagellata												0.732553
e1b1cc8501036b6977cc54919aca6561	OTU_193	D_0__Eukaryota	D_1__SAR	D_2__Stramenopiles	D_3__Ochrophyta	D_4__Eustigmatophyceae	D_5__Eustigmatales	D_6__uncultured	D_7__uncultured eukaryote	D_8__	D_9__	D_10__	D_11__	D_12__	D_13__	D_14__	0.992952
0587559f190404186b55b5ac53aedf9f	OTU_194	D_0__Eukaryota															1
16270d3267c8b27bddb83c000dc9a024	OTU_195	D_0__Eukaryota	D_1__SAR	D_2__Alveolata	D_3__Protalveolata	D_4__Syndiniales	D_5__uncultured Duboscquella	D_6__	D_7__	D_8__	D_9__	D_10__	D_11__	D_12__	D_13__	D_14__	0.99505
8df8c70153c8a93042f77f6f4f8463fa	OTU_196	D_0__Eukaryota	D_1__Opisthokonta	D_2__Holozoa	D_3__Metazoa (Animalia)	D_4__Eumetazoa	D_5__Bilateria	D_6__Arthropoda	D_7__Crustacea	D_8__Maxillopoda	D_9__Copepoda						0.980095
90d91b6e56869a6278bb8a7eb158ca99	OTU_197	D_0__Eukaryota	D_1__Haptophyta	D_2__Prymnesiophyceae	D_3__uncultured	D_4__unidentified prymnesiophyte clone OLI26047	D_5__	D_6__	D_7__	D_8__	D_9__	D_10__	D_11__	D_12__	D_13__	D_14__	0.999575
ecfd4b0e29c720a8c8186f5109eb1cb3	OTU_198	D_0__Eukaryota															1
5f9b54ea105d158b6384c3769867a895	OTU_199	D_0__Eukaryota	D_1__SAR	D_2__Stramenopiles	D_3__Ochrophyta	D_4__Diatomea	D_5__Bacillariophytina	D_6__Mediophyceae	D_7__Thalassiosira								0.933746
cce20ccfc82132be4e1bb1caea9bf081	OTU_200	D_0__Eukaryota	D_1__SAR	D_2__Alveolata	D_3__Dinoflagellata	D_4__Dinophyceae	D_5__Gymnodiniphycidae	D_6__Kareniaceae									0.829957
fc88b051e63b53998605701c74f07563	OTU_201	D_0__Eukaryota															1
345a52127059ae2b9bfab094ab31a2d1	OTU_202	D_0__Eukaryota															1
a9ee1596738966d4631c445a43a078d2	OTU_203	D_0__Eukaryota	D_1__Opisthokonta	D_2__Holozoa	D_3__Metazoa (Animalia)	D_4__Eumetazoa	D_5__Bilateria	D_6__Annelida	D_7__Polychaeta	D_8__Palpata							0.916078
4ed99c1b16ad9790231bdc77c28430d0	OTU_204	D_0__Eukaryota	D_1__Opisthokonta	D_2__Holozoa	D_3__Metazoa (Animalia)	D_4__Eumetazoa	D_5__Bilateria										0.984986
60f2b95a297b0f580fe669ceef82ff91	OTU_205	D_0__Eukaryota	D_1__SAR	D_2__Alveolata	D_3__Dinoflagellata	D_4__Dinophyceae											0.742044
dc8599c628d6ac13f1cb8388ddb18308	OTU_206	D_0__Eukaryota	D_1__SAR	D_2__Stramenopiles													0.981205
b4cbfe1715043fbeb3448d6312d3b5fe	OTU_207	D_0__Eukaryota															1
ed8bc7ac49898fccb4b8f5a56737ac6d	OTU_208	D_0__Eukaryota	D_1__Opisthokonta	D_2__Holozoa	D_3__Metazoa (Animalia)	D_4__Eumetazoa	D_5__Bilateria	D_6__Arthropoda	D_7__Crustacea	D_8__Maxillopoda	D_9__Copepoda						0.81965
5214ed4cdcbac75ab9c778cd37ef5f23	OTU_209	D_0__Eukaryota	D_1__SAR	D_2__Alveolata	D_3__Dinoflagellata	D_4__Dinophyceae											0.706755
f04499dcf2827b906b5ab8b8740df34b	OTU_210	D_0__Eukaryota															1
23d20d86a58ff25cf324316e3d61e9ba	OTU_211	D_0__Eukaryota	D_1__Excavata	D_2__Discoba	D_3__Discicristata	D_4__Euglenozoa	D_5__Kinetoplastea	D_6__Metakinetoplastina	D_7__Neobodonida	D_8__Neobodo							0.983941
ccc028af683da1de5cf0a747631a546f	OTU_212	D_0__Eukaryota	D_1__SAR	D_2__Alveolata	D_3__Apicomplexa	D_4__Conoidasida	D_5__Gregarinasina	D_6__Archigregarinorida	D_7__Selenidium								0.989014
f45c453fbe18d144d37f677d09080051	OTU_213	D_0__Eukaryota	D_1__Opisthokonta	D_2__Holozoa	D_3__Metazoa (Animalia)	D_4__Eumetazoa	D_5__Bilateria	D_6__Annelida	D_7__Polychaeta	D_8__Scolecida	D_9__Spionida						0.999206
edc662fdd86c10808685847a70e609a6	OTU_214	D_0__Eukaryota															1
af91269e21ce8353156342284a4f3ae8	OTU_215	D_0__Eukaryota	D_1__Opisthokonta	D_2__Holozoa	D_3__Metazoa (Animalia)	D_4__Eumetazoa	D_5__Bilateria	D_6__Gastrotricha	D_7__Chaetonotida	D_8__Halichaetonotus schromi	D_9__	D_10__	D_11__	D_12__	D_13__	D_14__	0.818371
8dd28efa6070a22dbbf83726c33b30df	OTU_216	D_0__Eukaryota															1
5b6220787e5f1b9e24716447d13d1276	OTU_217	D_0__Eukaryota	D_1__Opisthokonta	D_2__Holozoa	D_3__Metazoa (Animalia)	D_4__Eumetazoa	D_5__Bilateria	D_6__Hemichordata	D_7__Enteropneusta	D_8__Harrimaniidae							1
346507f63ae81bd6ec37c38fd9cdb633	OTU_218	D_0__Eukaryota	D_1__SAR	D_2__Stramenopiles													0.996922
3cf1ac2ac9d455726bd74c9234deab84	OTU_219	D_0__Eukaryota	D_1__SAR	D_2__Stramenopiles	D_3__Ochrophyta	D_4__Diatomea	D_5__Bacillariophytina										0.828379
deb817855ccf2aecee02af9fbbbc65e0	OTU_220	D_0__Eukaryota	D_1__Opisthokonta	D_2__Holozoa	D_3__Metazoa (Animalia)	D_4__Eumetazoa	D_5__Bilateria	D_6__Arthropoda	D_7__Crustacea	D_8__Maxillopoda	D_9__Copepoda	D_10__Calanoida	D_11__Centropages furcatus	D_12__	D_13__	D_14__	1
85cc4a13e2dc9f71b7f2178fe0450605	OTU_221	D_0__Eukaryota	D_1__SAR	D_2__Alveolata	D_3__Ciliophora	D_4__Intramacronucleata	D_5__Spirotrichea	D_6__Choreotrichia	D_7__Steenstrupiella	D_8__uncultured eukaryote	D_9__	D_10__	D_11__	D_12__	D_13__	D_14__	1
9c32d493fb534376cfe621fd95e2373a	OTU_222	D_0__Eukaryota	D_1__Opisthokonta	D_2__Nucletmycea	D_3__Fungi	D_4__Dikarya	D_5__Basidiomycota	D_6__Ustilaginomycotina	D_7__Malasseziomycetes	D_8__Malasseziales	D_9__Malasseziaceae	D_10__Malassezia	D_11__Malassezia pachydermatis	D_12__	D_13__	D_14__	0.885086
77e6a004a3327f28ee82c03b63a2f661	OTU_223	D_0__Eukaryota	D_1__Opisthokonta	D_2__Nucletmycea	D_3__Fungi	D_4__Dikarya	D_5__Basidiomycota	D_6__Agaricomycotina									0.739173
a94bcc231c31e5d8a5940ce32ff552e7	OTU_224	D_0__Eukaryota	D_1__SAR	D_2__Stramenopiles	D_3__Ochrophyta	D_4__Diatomea	D_5__Bacillariophytina	D_6__Bacillariophyceae									0.82083
90a75b782c5be3f9b739d8c69590eda4	OTU_225	D_0__Eukaryota															1
63b4f87fe3c23228eee8f784804feaca	OTU_226	D_0__Eukaryota															1
e24e39b22c8aa9227f9cb0b7d1af21b9	OTU_227	D_0__Eukaryota	D_1__SAR	D_2__Stramenopiles	D_3__Ochrophyta	D_4__Diatomea	D_5__Coscinodiscophytina	D_6__Actinocyclus	D_7__Actinocyclus curvatulus	D_8__	D_9__	D_10__	D_11__	D_12__	D_13__	D_14__	0.999998
a20a59c8946e31e62772c8a0a1475b8d	OTU_228	D_0__Eukaryota	D_1__SAR	D_2__Stramenopiles	D_3__Ochrophyta	D_4__Diatomea											0.99973
020645d3b0aa28447db962d09243df88	OTU_229	D_0__Eukaryota	D_1__Opisthokonta	D_2__Holozoa	D_3__Metazoa (Animalia)	D_4__Eumetazoa	D_5__Bilateria	D_6__Arthropoda	D_7__Crustacea	D_8__Malacostraca	D_9__Eumalacostraca	D_10__Peracarida					0.998541
52f24303535ac5c9c100b01552d018ac	OTU_230	D_0__Eukaryota															1
08282972630627e934a91345ca83d411	OTU_231	D_0__Eukaryota	D_1__Opisthokonta	D_2__Nucletmycea	D_3__Fungi	D_4__Dikarya	D_5__Ascomycota	D_6__Pezizomycotina	D_7__Dothideomycetes	D_8__Capnodiales	D_9__Teratosphaeriaceae	D_10__Hortaea	D_11__Hortaea werneckii	D_12__	D_13__	D_14__	0.999399
cb28a22af559e458cd6b5feedff1b260	OTU_232	D_0__Eukaryota	D_1__SAR	D_2__Stramenopiles	D_3__Ochrophyta	D_4__Diatomea											0.983169
2f6dcce5402f69f104b3d8f08e99dc11	OTU_233	D_0__Eukaryota	D_1__SAR	D_2__Stramenopiles	D_3__uncultured	D_4__uncultured stramenopile	D_5__	D_6__	D_7__	D_8__	D_9__	D_10__	D_11__	D_12__	D_13__	D_14__	1
7f17aa43ef38fcf5c96c93a7d2f69bcf	OTU_234	D_0__Eukaryota	D_1__SAR	D_2__Alveolata	D_3__Ciliophora	D_4__Intramacronucleata	D_5__Spirotrichea	D_6__Oligotrichia	D_7__Pseudotontonia	D_8__uncultured eukaryote	D_9__	D_10__	D_11__	D_12__	D_13__	D_14__	0.756702
aed5aa028a351e99690aafd367bae87f	OTU_235	D_0__Eukaryota	D_1__Opisthokonta	D_2__Holozoa	D_3__Metazoa (Animalia)												0.793431
ae2d0ece34e199855c057f5293157519	OTU_236	D_0__Eukaryota	D_1__Opisthokonta	D_2__Holozoa	D_3__Metazoa (Animalia)	D_4__Porifera	D_5__Demospongiae	D_6__Suberitida	D_7__Terpios aploos	D_8__	D_9__	D_10__	D_11__	D_12__	D_13__	D_14__	1
0af202fda12799fcf5782503997b1295	OTU_237	D_0__Eukaryota	D_1__Opisthokonta	D_2__Holozoa	D_3__Metazoa (Animalia)	D_4__Eumetazoa	D_5__Bilateria	D_6__Arthropoda									0.973396
a1c6f869ca67f215e543826fc6f8ace3	OTU_238	D_0__Eukaryota															1
84b318b5b170e7e7ab176e85f23c7ef8	OTU_239	D_0__Eukaryota	D_1__SAR	D_2__Alveolata	D_3__Protalveolata	D_4__Syndiniales	D_5__Syndiniales Group I	D_6__uncultured Duboscquella	D_7__	D_8__	D_9__	D_10__	D_11__	D_12__	D_13__	D_14__	0.999992
ee2bf1c995c18544f9e1802dbd635245	OTU_240	D_0__Eukaryota	D_1__Opisthokonta	D_2__Holozoa	D_3__Metazoa (Animalia)	D_4__Eumetazoa	D_5__Bilateria										0.999001
331ad55e0af513d147a2686e07606718	OTU_241	D_0__Eukaryota															1
fd91c32e6ed729722459e73c4898e682	OTU_242	D_0__Eukaryota	D_1__SAR	D_2__Rhizaria	D_3__Cercozoa	D_4__Chlorarachniophyta	D_5__uncultured	D_6__uncultured marine eukaryote	D_7__	D_8__	D_9__	D_10__	D_11__	D_12__	D_13__	D_14__	1
7da105fe2a374611c0f2739817afc7f7	OTU_243	D_0__Eukaryota	D_1__SAR	D_2__Stramenopiles	D_3__Ochrophyta	D_4__Chrysophyceae											0.961868
d09daa5ff7958fa05a6a1ffc0fa92a41	OTU_244	D_0__Eukaryota	D_1__SAR	D_2__Rhizaria	D_3__Cercozoa	D_4__Thecofilosea	D_5__Cryomonadida	D_6__Protaspidae	D_7__Protaspis	D_8__uncultured eukaryote	D_9__	D_10__	D_11__	D_12__	D_13__	D_14__	0.99997
340e7e986a205a64d2acaf45eab1d1a4	OTU_245	D_0__Eukaryota	D_1__SAR	D_2__Alveolata	D_3__Dinoflagellata	D_4__Dinophyceae											0.988559
e2afc87aa04e052989fd54210e3f8514	OTU_246	D_0__Eukaryota	D_1__SAR	D_2__Stramenopiles	D_3__Ochrophyta	D_4__Diatomea	D_5__Bacillariophytina	D_6__Bacillariophyceae									0.977916
2e85cf339192597c9f3278c6d9252632	OTU_247	D_0__Eukaryota	D_1__Opisthokonta	D_2__Holozoa	D_3__Metazoa (Animalia)	D_4__Eumetazoa	D_5__Bilateria	D_6__Arthropoda	D_7__Crustacea	D_8__Maxillopoda	D_9__Copepoda	D_10__Harpacticoida					0.78677
e34e5dcd60692e178fb799db5492ff15	OTU_248	D_0__Eukaryota															1
4ec99a5ceb6882c67b0d68ebff05c8a6	OTU_249	D_0__Eukaryota	D_1__Opisthokonta	D_2__Holozoa	D_3__Metazoa (Animalia)	D_4__Eumetazoa	D_5__Bilateria	D_6__Annelida	D_7__Polychaeta	D_8__Palpata	D_9__Phyllodocida	D_10__Kefersteinia cirrata	D_11__	D_12__	D_13__	D_14__	0.988878
1d37747c078b233da95d831146e00f1c	OTU_250	D_0__Eukaryota															1
32fa062f5a78ed0e5ae39abd1c36d6e9	OTU_251	D_0__Eukaryota	D_1__SAR	D_2__Alveolata	D_3__Ciliophora	D_4__Intramacronucleata	D_5__Conthreep	D_6__Oligohymenophorea	D_7__Hymenostomatia	D_8__Tetrahymena	D_9__Tetrahymenid sp. WF	D_10__	D_11__	D_12__	D_13__	D_14__	0.998728
89d76989aedd18c307c70ab4e947f5be	OTU_252	D_0__Eukaryota															1
3feffed3198d72ecb117c2f37448ee20	OTU_253	D_0__Eukaryota	D_1__Opisthokonta	D_2__Holozoa	D_3__Metazoa (Animalia)	D_4__Eumetazoa	D_5__Bilateria	D_6__Gastrotricha	D_7__Chaetonotida								0.990612
2c97e88ede91f7e37520c64b1bbd3be0	OTU_254	D_0__Eukaryota	D_1__Opisthokonta	D_2__Holozoa	D_3__Metazoa (Animalia)	D_4__Eumetazoa	D_5__Bilateria	D_6__Arthropoda	D_7__Crustacea	D_8__Maxillopoda	D_9__Copepoda	D_10__Siphonostomatoida	D_11__Orecturus sp. New Caledonia-RJH-2004	D_12__	D_13__	D_14__	0.795799
9c2f3c8c59179546306b27af8275c7b3	OTU_255	D_0__Eukaryota	D_1__SAR	D_2__Alveolata	D_3__Protalveolata	D_4__Syndiniales	D_5__Syndiniales Group I	D_6__uncultured Duboscquella	D_7__	D_8__	D_9__	D_10__	D_11__	D_12__	D_13__	D_14__	0.999932
a6d561fdb71209c5b46bb179926fa167	OTU_256	D_0__Eukaryota	D_1__SAR	D_2__Stramenopiles													0.99592
20a59c75bf3a5a7b690b06b1a1e02408	OTU_257	D_0__Eukaryota	D_1__Archaeplastida	D_2__Chloroplastida	D_3__Charophyta	D_4__Phragmoplastophyta	D_5__Streptophyta	D_6__Embryophyta	D_7__Tracheophyta	D_8__Spermatophyta	D_9__Magnoliophyta	D_10__Restionaceae environmental sample	D_11__	D_12__	D_13__	D_14__	0.998673
9e0facaf92a5c8634d905f6c9c79800e	OTU_258	D_0__Eukaryota	D_1__SAR	D_2__Rhizaria	D_3__Retaria	D_4__Foraminifera	D_5__Globothalamea	D_6__Rotaliida									1
8a6f5f8f1b852077c543352c91368705	OTU_259	D_0__Eukaryota	D_1__SAR	D_2__Rhizaria	D_3__Retaria	D_4__RAD A	D_5__uncultured marine Polycystinea	D_6__	D_7__	D_8__	D_9__	D_10__	D_11__	D_12__	D_13__	D_14__	0.765749
bda7dfb55afe2d8ea2b14200d689aa25	OTU_260	D_0__Eukaryota	D_1__Opisthokonta	D_2__Nucletmycea	D_3__Fungi	D_4__Dikarya	D_5__Ascomycota	D_6__Pezizomycotina	D_7__Eurotiomycetes	D_8__Eurotiales	D_9__Aspergillaceae	D_10__Aspergillus					0.998315
8c3af4cc2f6066a73f621ee881eb6ebb	OTU_261	D_0__Eukaryota	D_1__Opisthokonta	D_2__Holozoa	D_3__Metazoa (Animalia)	D_4__Eumetazoa	D_5__Bilateria	D_6__Arthropoda	D_7__Crustacea	D_8__Maxillopoda	D_9__Copepoda	D_10__Poecilostomatoida	D_11__uncultured eukaryote	D_12__	D_13__	D_14__	0.999595
508518958a31f08f4dea8b994ef6bdea	OTU_262	D_0__Eukaryota															1
1b1cd52bcda82509084e38b91768c744	OTU_263	D_0__Eukaryota	D_1__SAR	D_2__Alveolata	D_3__Dinoflagellata	D_4__Dinophyceae											0.901563
22d411c70f93b4ca38368709c56078b2	OTU_264	D_0__Eukaryota	D_1__Excavata	D_2__Discoba	D_3__Discicristata	D_4__Euglenozoa											0.751138
472373cde020a38f9186e3258c61f16f	OTU_265	D_0__Eukaryota	D_1__Opisthokonta	D_2__Holozoa	D_3__Metazoa (Animalia)	D_4__Eumetazoa	D_5__Bilateria	D_6__Arthropoda	D_7__Crustacea	D_8__Maxillopoda	D_9__Copepoda	D_10__Cyclopoida	D_11__Cyclopina gracilis	D_12__	D_13__	D_14__	0.783526
3074f0e872e3eb594204d541d53ab188	OTU_266	D_0__Eukaryota															1
296ec0118ac28c09c8747f6a4fdf7f8b	OTU_267	D_0__Eukaryota	D_1__Opisthokonta	D_2__Holozoa	D_3__Metazoa (Animalia)	D_4__Eumetazoa	D_5__Cnidaria	D_6__Anthozoa	D_7__Octocorallia	D_8__Telestacea	D_9__Pseudocladochonus hicksoni	D_10__	D_11__	D_12__	D_13__	D_14__	0.707251
aab68a513538ab22bdf45056e846a417	OTU_268	D_0__Eukaryota	D_1__Opisthokonta														0.942707
1d36cc675a1f136f43d6740159477b07	OTU_269	D_0__Eukaryota															1
08191b2608ccde169331af45966cc772	OTU_270	D_0__Eukaryota	D_1__Opisthokonta	D_2__Holozoa	D_3__Metazoa (Animalia)	D_4__Eumetazoa	D_5__Cnidaria	D_6__Anthozoa	D_7__Octocorallia	D_8__Telestacea	D_9__Pseudocladochonus hicksoni	D_10__	D_11__	D_12__	D_13__	D_14__	0.714023
54ac996bad6f317c4a158be1ca9b5e4e	OTU_271	D_0__Eukaryota	D_1__SAR	D_2__Alveolata	D_3__Protalveolata	D_4__Syndiniales											0.954491
9eedf4f6947d1a69459ee5c2a4d07861	OTU_272	D_0__Eukaryota															1
edeff794d8291b4b1b8b984e122a46e4	OTU_273	D_0__Eukaryota	D_1__Opisthokonta	D_2__Holozoa	D_3__Metazoa (Animalia)	D_4__Eumetazoa	D_5__Bilateria	D_6__Arthropoda	D_7__Crustacea	D_8__Maxillopoda	D_9__Copepoda	D_10__uncultured eukaryote	D_11__	D_12__	D_13__	D_14__	0.87185
dd3f88d8430c161ba28f5eb4111846b4	OTU_274	D_0__Eukaryota	D_1__SAR	D_2__Stramenopiles	D_3__MAST-3	D_4__MAST-3A	D_5__Rhizidiomyces apophysatus	D_6__	D_7__	D_8__	D_9__	D_10__	D_11__	D_12__	D_13__	D_14__	0.999998
c6eb1c4df9d15e42a863eda67a8c25e7	OTU_275	D_0__Eukaryota	D_1__SAR	D_2__Alveolata	D_3__Protalveolata	D_4__Syndiniales	D_5__Syndiniales Group II	D_6__uncultured alveolate	D_7__	D_8__	D_9__	D_10__	D_11__	D_12__	D_13__	D_14__	0.789183
82ba150d33e863b756faf113366cd07b	OTU_276	D_0__Eukaryota	D_1__Opisthokonta	D_2__Holozoa	D_3__Metazoa (Animalia)	D_4__Eumetazoa	D_5__Bilateria	D_6__Rotifera	D_7__Monogononta	D_8__Ploimida							0.753575
d74543915e71f8d0229ed2b9b27bfa8f	OTU_277	D_0__Eukaryota	D_1__Opisthokonta	D_2__Holozoa	D_3__Metazoa (Animalia)	D_4__Eumetazoa	D_5__Bilateria	D_6__Arthropoda	D_7__Crustacea	D_8__Maxillopoda	D_9__Copepoda	D_10__Harpacticoida					0.71791
1a90de8e5fb1c144c508fcc074887217	OTU_278	D_0__Eukaryota	D_1__Opisthokonta	D_2__Holozoa	D_3__Metazoa (Animalia)	D_4__Eumetazoa	D_5__Cnidaria	D_6__Anthozoa	D_7__Octocorallia	D_8__Alcyonacea	D_9__Dendronephthya putteri	D_10__	D_11__	D_12__	D_13__	D_14__	0.782323
99bd12d14a54007acfb616ea9e301bc7	OTU_279	D_0__Eukaryota	D_1__Opisthokonta	D_2__Holozoa	D_3__Metazoa (Animalia)	D_4__Porifera	D_5__Demospongiae	D_6__Verongiida	D_7__Aplysina cavernicola	D_8__	D_9__	D_10__	D_11__	D_12__	D_13__	D_14__	0.999963
41bb6f5b8891a620a0d84de9b853d1b1	OTU_280	D_0__Eukaryota	D_1__SAR	D_2__Stramenopiles	D_3__Ochrophyta	D_4__Diatomea											0.993321
679a8bdae4abe5b0adbfc5993388fa62	OTU_281	D_0__Eukaryota	D_1__SAR	D_2__Alveolata	D_3__Dinoflagellata	D_4__Dinophyceae	D_5__Gymnodiniphycidae	D_6__Gymnodinium clade	D_7__Erythropsidinium	D_8__uncultured eukaryote	D_9__	D_10__	D_11__	D_12__	D_13__	D_14__	0.865604
656b23d03693f124cd59ef45cd1858c3	OTU_282	D_0__Eukaryota	D_1__Archaeplastida	D_2__Chloroplastida	D_3__Chlorophyta	D_4__Chlorodendrophyceae	D_5__Chlorodendrales	D_6__Tetraselmis	D_7__Tetraselmis chuii	D_8__	D_9__	D_10__	D_11__	D_12__	D_13__	D_14__	0.778776
22fc4c88f032311d1602b9d9f57a7605	OTU_283	D_0__Eukaryota	D_1__Opisthokonta	D_2__Holozoa	D_3__Metazoa (Animalia)	D_4__Eumetazoa	D_5__Bilateria	D_6__Arthropoda	D_7__Crustacea	D_8__Maxillopoda	D_9__Copepoda	D_10__Harpacticoida	D_11__Paramphiascella fulvofasciata	D_12__	D_13__	D_14__	0.99827
8806b796e6d220a4dea7d66560d8fce1	OTU_284	D_0__Eukaryota															1
9c2ddcc69856ca59ea698a51203f7af0	OTU_285	D_0__Eukaryota	D_1__SAR	D_2__Stramenopiles	D_3__Ochrophyta												0.888508
a583ab06edd4f176752d7f8fa27f9e0f	OTU_286	D_0__Eukaryota	D_1__SAR	D_2__Alveolata	D_3__Dinoflagellata	D_4__Dinophyceae	D_5__Gymnodiniphycidae	D_6__Suessiaceae	D_7__Symbiodinium	D_8__Symbiodinium sp. 4-91	D_9__	D_10__	D_11__	D_12__	D_13__	D_14__	0.929779
a9e48d26e40ed89e79f713045ed80d28	OTU_287	D_0__Eukaryota	D_1__SAR	D_2__Rhizaria	D_3__Retaria	D_4__Polycystinea	D_5__Collodaria	D_6__Collosphaera	D_7__marine metagenome	D_8__	D_9__	D_10__	D_11__	D_12__	D_13__	D_14__	0.931394
f05ebb3cf4fc8dfa3d99be32a528af2f	OTU_288	D_0__Eukaryota	D_1__Opisthokonta	D_2__Nucletmycea	D_3__Fungi	D_4__Dikarya	D_5__Basidiomycota	D_6__Ustilaginomycotina	D_7__Malasseziomycetes	D_8__Malasseziales	D_9__Malasseziaceae	D_10__Malassezia	D_11__Malassezia japonica	D_12__	D_13__	D_14__	0.771708
f31c56e2ce0245b6cdc4ed178a0c7228	OTU_289	D_0__Eukaryota	D_1__Opisthokonta	D_2__Holozoa	D_3__Metazoa (Animalia)	D_4__Eumetazoa	D_5__Bilateria	D_6__Annelida	D_7__Polychaeta	D_8__Scolecida	D_9__Spionida	D_10__Prionospio cirrifera	D_11__	D_12__	D_13__	D_14__	0.97854
84f82338481d01fc50b4a7a5c62e1eef	OTU_290	D_0__Eukaryota	D_1__Opisthokonta	D_2__Holozoa	D_3__Metazoa (Animalia)	D_4__Eumetazoa	D_5__Bilateria	D_6__Annelida	D_7__Polychaeta	D_8__Palpata	D_9__Phyllodocida						0.998719
d16ee7f7f968b6f335733e636f3aed8b	OTU_291	D_0__Eukaryota															1
0f1aaa2a91281974fcef6e29eafcd130	OTU_292	D_0__Eukaryota															1
8934ba7222a3355123370e17066ac7e7	OTU_293	D_0__Eukaryota	D_1__Opisthokonta	D_2__Holozoa	D_3__Metazoa (Animalia)	D_4__Eumetazoa	D_5__Bilateria	D_6__Annelida	D_7__Clitellata	D_8__Hirudinida	D_9__Rhynchobdellida						0.703466
9ead14e7abd32c2e56eda68266808e63	OTU_294	D_0__Eukaryota	D_1__SAR	D_2__Alveolata	D_3__Apicomplexa	D_4__Novel Apicomplexa Class 2	D_5__Gregarinasina gen. sp. 1 KCW-2013	D_6__	D_7__	D_8__	D_9__	D_10__	D_11__	D_12__	D_13__	D_14__	0.898431
6d43a6741d90e18f0bb9d302de2bdf8f	OTU_295	D_0__Eukaryota	D_1__SAR	D_2__Alveolata	D_3__Protalveolata	D_4__Syndiniales	D_5__Syndiniales Group II	D_6__uncultured eukaryote	D_7__	D_8__	D_9__	D_10__	D_11__	D_12__	D_13__	D_14__	0.824548
1b6892fb9021ece7a76b464916aa233c	OTU_296	D_0__Eukaryota	D_1__SAR	D_2__Alveolata	D_3__Protalveolata	D_4__Syndiniales	D_5__Syndiniales Group II	D_6__uncultured Amoebophrya	D_7__	D_8__	D_9__	D_10__	D_11__	D_12__	D_13__	D_14__	0.994927
92e4008011db82d57ff0a904cdbc56fa	OTU_297	D_0__Eukaryota	D_1__Opisthokonta	D_2__Holozoa	D_3__Metazoa (Animalia)	D_4__Eumetazoa	D_5__Bilateria	D_6__Arthropoda	D_7__Crustacea	D_8__Maxillopoda	D_9__Copepoda	D_10__Cyclopoida	D_11__uncultured eukaryote	D_12__	D_13__	D_14__	0.999555
f219441c4f44885033e38204f98ceb14	OTU_298	D_0__Eukaryota	D_1__SAR	D_2__Alveolata	D_3__Apicomplexa	D_4__Conoidasida	D_5__Gregarinasina	D_6__Eugregarinorida	D_7__Gregarina	D_8__Heterocapsaceae environmental sample	D_9__	D_10__	D_11__	D_12__	D_13__	D_14__	0.992634
d6685963a72cca9313e79e4a8a3e8f5d	OTU_299	D_0__Eukaryota															1
a5d56b2ebff8160c0f0c0adeee65caa8	OTU_300	D_0__Eukaryota	D_1__Opisthokonta	D_2__Holozoa	D_3__Metazoa (Animalia)	D_4__Eumetazoa	D_5__Bilateria	D_6__Hemichordata	D_7__Enteropneusta	D_8__Harrimaniidae							0.999883
a814ee90997614e2b3ad13f83031ac01	OTU_301	D_0__Eukaryota	D_1__SAR	D_2__Alveolata	D_3__Protalveolata	D_4__Syndiniales											0.73435
81230beee1f89935dab00ffb478f97a1	OTU_302	D_0__Eukaryota	D_1__Opisthokonta														0.708091
a681f9622f47f82a1d4a468bb4376d14	OTU_303	D_0__Eukaryota	D_1__SAR	D_2__Alveolata	D_3__Ciliophora	D_4__Intramacronucleata	D_5__Spirotrichea	D_6__Oligotrichia									0.942554
c48b4e661dd5782d1bb67b4380ab582f	OTU_304	D_0__Eukaryota	D_1__SAR	D_2__Alveolata													0.999532
7ff6a16d0d223a99303386408ec44bed	OTU_305	D_0__Eukaryota	D_1__SAR	D_2__Stramenopiles	D_3__Ochrophyta	D_4__Diatomea	D_5__Bacillariophytina	D_6__Mediophyceae									0.965564
521ca7d358509c1ea6e024eb0bdb5332	OTU_306	D_0__Eukaryota	D_1__Opisthokonta	D_2__Holozoa	D_3__Metazoa (Animalia)	D_4__Eumetazoa	D_5__Bilateria	D_6__Arthropoda									0.755116
35f78ed705ebc4e9afff9502113f8277	OTU_307	D_0__Eukaryota	D_1__SAR	D_2__Stramenopiles	D_3__Ochrophyta	D_4__ANT37-16	D_5__eukaryote marine clone ANT37-16	D_6__	D_7__	D_8__	D_9__	D_10__	D_11__	D_12__	D_13__	D_14__	0.841219
7117a6a5bbec5b8ba8f893e8eeabc550	OTU_308	D_0__Eukaryota	D_1__Opisthokonta	D_2__Holozoa	D_3__Metazoa (Animalia)	D_4__Eumetazoa	D_5__Bilateria										0.923211
50b3fb31b9511b3a3eb15845ee8d2404	OTU_309	D_0__Eukaryota	D_1__SAR	D_2__Stramenopiles	D_3__Ochrophyta	D_4__Diatomea	D_5__Bacillariophytina	D_6__Mediophyceae	D_7__Thalassiosira								0.895806
e8575092bc0e5ccfe8ce6cdc4ac4b552	OTU_310	D_0__Eukaryota	D_1__SAR	D_2__Alveolata	D_3__Dinoflagellata	D_4__Dinophyceae	D_5__Gymnodiniphycidae	D_6__Gymnodinium clade	D_7__Erythropsidinium	D_8__uncultured eukaryote	D_9__	D_10__	D_11__	D_12__	D_13__	D_14__	0.885923
483a68690f34645fe8cb8362b619ca13	OTU_311	D_0__Eukaryota															1
444d7a63d98dd2c66768c52a5c983195	OTU_312	D_0__Eukaryota	D_1__Opisthokonta	D_2__Holozoa	D_3__Metazoa (Animalia)	D_4__Eumetazoa	D_5__Bilateria	D_6__Arthropoda	D_7__Crustacea	D_8__Maxillopoda	D_9__Copepoda	D_10__Harpacticoida	D_11__Diarthrodes sp. 1 New Caledonia-RJH-2007	D_12__	D_13__	D_14__	0.756834
d83ff4f32a1b5d2ec8456dea84600c59	OTU_313	D_0__Eukaryota	D_1__SAR	D_2__Stramenopiles	D_3__Ochrophyta	D_4__Diatomea	D_5__Coscinodiscophytina	D_6__Fragilariales									0.984447
47ede2dac0278ae4ff03824823c9fcea	OTU_314	D_0__Eukaryota	D_1__SAR	D_2__Alveolata	D_3__Dinoflagellata	D_4__Dinophyceae											0.77705
ff007eedbcfb5ceda0680f2666758f35	OTU_315	D_0__Eukaryota	D_1__Opisthokonta	D_2__Nucletmycea	D_3__Fungi	D_4__Dikarya	D_5__Basidiomycota	D_6__Agaricomycotina	D_7__Tremellomycetes	D_8__Tremellales	D_9__Bulleribasidiaceae						0.907519
497d465f8260650844d8dcece24f565b	OTU_316	D_0__Eukaryota	D_1__SAR	D_2__Stramenopiles	D_3__Ochrophyta	D_4__Diatomea											0.973158
ba056428dc894492ebed9d329fb719f7	OTU_317	D_0__Eukaryota	D_1__Opisthokonta	D_2__Holozoa	D_3__Metazoa (Animalia)	D_4__Eumetazoa	D_5__Bilateria	D_6__Arthropoda	D_7__Crustacea	D_8__Maxillopoda	D_9__Copepoda						0.966803
bdebf9f2f1b823d6f8b4f709241a412f	OTU_318	D_0__Eukaryota	D_1__Opisthokonta	D_2__Nucletmycea	D_3__Fungi	D_4__Dikarya	D_5__Ascomycota	D_6__Saccharomycotina	D_7__Saccharomycetes	D_8__Saccharomycetales	D_9__Debaryomycetaceae	D_10__Candida-Lodderomyces clade	D_11__Lodderomyces elongisporus NRRL YB-4239	D_12__	D_13__	D_14__	0.982854
7a53d44e65ca7149b85c130b1e79d44f	OTU_319	D_0__Eukaryota	D_1__Opisthokonta														0.996899
eae013f55e53036d4d29eebb7bf0c21c	OTU_320	D_0__Eukaryota	D_1__Opisthokonta	D_2__Holozoa	D_3__Metazoa (Animalia)	D_4__Eumetazoa	D_5__Bilateria	D_6__Gastrotricha	D_7__Chaetonotida	D_8__uncultured eukaryote	D_9__	D_10__	D_11__	D_12__	D_13__	D_14__	0.994176
27534364e2477d3ba82ded78dcc1c7ff	OTU_321	D_0__Eukaryota	D_1__Opisthokonta	D_2__Holozoa	D_3__Metazoa (Animalia)	D_4__Eumetazoa	D_5__Bilateria	D_6__Arthropoda	D_7__Crustacea	D_8__Maxillopoda	D_9__Copepoda	D_10__Calanoida	D_11__Sinocalanus sinensis	D_12__	D_13__	D_14__	0.996134
57a99e71adc0292a57c98dfe8e0a76e8	OTU_322	D_0__Eukaryota	D_1__SAR	D_2__Alveolata	D_3__Dinoflagellata	D_4__Dinophyceae	D_5__Gymnodiniphycidae										0.999911
5c20bec4c55a0c778a325d3631c9cd50	OTU_323	D_0__Eukaryota	D_1__Opisthokonta	D_2__Holozoa	D_3__Metazoa (Animalia)	D_4__Eumetazoa	D_5__Bilateria	D_6__Arthropoda									0.922141
5a0db39d3a17e8d29306d56c976822e7	OTU_324	D_0__Eukaryota	D_1__Archaeplastida	D_2__Chloroplastida	D_3__Chlorophyta	D_4__Mamiellophyceae	D_5__Mamiellales										0.748771
bca50662d5b32e0f35e5f6c25ca62523	OTU_325	D_0__Eukaryota															1
b3f01d98bfe79ed4a47371ba1033b6e1	OTU_326	D_0__Eukaryota	D_1__Opisthokonta	D_2__Holozoa	D_3__Metazoa (Animalia)	D_4__Eumetazoa	D_5__Bilateria	D_6__Xenacoelomorpha	D_7__Acoelomorpha	D_8__Acoela	D_9__Atriofronta polyvacuola	D_10__	D_11__	D_12__	D_13__	D_14__	1
90421b0c6a792b3d9b50e77daa00b685	OTU_327	D_0__Eukaryota	D_1__SAR	D_2__Alveolata	D_3__Dinoflagellata	D_4__Dinophyceae											0.900981
3380298ba2d4501d471acbe58c0c6bbe	OTU_328	D_0__Eukaryota	D_1__Archaeplastida	D_2__Rhodophyceae	D_3__Florideophycidae	D_4__Rhodymeniophycidae	D_5__Polsiphonia	D_6__Polysiphonia scopulorum	D_7__	D_8__	D_9__	D_10__	D_11__	D_12__	D_13__	D_14__	0.924133
b0bb017f0d3de169df5035ed922f0589	OTU_329	D_0__Eukaryota	D_1__Opisthokonta														0.996604
3a8ed4e87315f7bee34916be1ebc7c2b	OTU_330	D_0__Eukaryota	D_1__SAR	D_2__Stramenopiles	D_3__Ochrophyta	D_4__Raphidophyceae	D_5__uncultured stramenopile	D_6__	D_7__	D_8__	D_9__	D_10__	D_11__	D_12__	D_13__	D_14__	1
10d7307808c31c766e54ccb39b247d84	OTU_331	D_0__Eukaryota	D_1__Opisthokonta	D_2__Holozoa	D_3__Metazoa (Animalia)	D_4__Eumetazoa	D_5__Bilateria	D_6__Arthropoda	D_7__Crustacea	D_8__Maxillopoda	D_9__Copepoda	D_10__Cyclopoida	D_11__Archinotodelphys sp. New Caledonia-RJH-2001	D_12__	D_13__	D_14__	0.705648
83ffcbf8dd13039b8c1748feb5bfbc09	OTU_332	D_0__Eukaryota	D_1__SAR	D_2__Alveolata	D_3__Protalveolata	D_4__Syndiniales	D_5__Syndiniales Group II	D_6__uncultured eukaryote	D_7__	D_8__	D_9__	D_10__	D_11__	D_12__	D_13__	D_14__	0.887041
3be8cbad2dd9d67397cf476c592758b7	OTU_333	D_0__Eukaryota	D_1__SAR	D_2__Alveolata	D_3__Dinoflagellata	D_4__Dinophyceae	D_5__Peridiniphycidae	D_6__Peridiniales	D_7__Heterocapsa	D_8__uncultured eukaryote	D_9__	D_10__	D_11__	D_12__	D_13__	D_14__	0.96159
3fd01f584625fc3372d8594f6293b9f7	OTU_334	D_0__Eukaryota															1
eb666cf3da3ec0e897099df924736265	OTU_335	D_0__Eukaryota	D_1__SAR	D_2__Stramenopiles	D_3__Ochrophyta	D_4__Diatomea	D_5__Bacillariophytina	D_6__Bacillariophyceae									0.960806
4c4054cffa97d2fcc2d2aed2a20e72a3	OTU_336	D_0__Eukaryota															1
8b5b2217d1e61c6c5220f835fba644b7	OTU_337	D_0__Eukaryota	D_1__Opisthokonta	D_2__Holozoa	D_3__Metazoa (Animalia)	D_4__Eumetazoa	D_5__Bilateria										0.913273
83321a497e78760c697c5f084216ae8a	OTU_338	D_0__Eukaryota															1
b9f2496a61dd8fd3267141f38bb75d13	OTU_339	D_0__Eukaryota	D_1__Opisthokonta	D_2__Holozoa	D_3__Metazoa (Animalia)	D_4__Eumetazoa	D_5__Bilateria	D_6__Annelida	D_7__Polychaeta								0.822694
16337d8d7948563cae8e6892e1a983fe	OTU_340	D_0__Eukaryota	D_1__Opisthokonta	D_2__Nucletmycea	D_3__Fungi	D_4__Dikarya	D_5__Basidiomycota	D_6__Agaricomycotina	D_7__Agaricomycetes	D_8__Polyporales							0.702611
e7042e15412c48debe4f523a9b63fbfd	OTU_341	D_0__Eukaryota	D_1__Archaeplastida	D_2__Chloroplastida	D_3__Chlorophyta	D_4__Ulvophyceae	D_5__marine metagenome	D_6__	D_7__	D_8__	D_9__	D_10__	D_11__	D_12__	D_13__	D_14__	1
d91d77f055d705e76fe95df8e857c6bd	OTU_342	D_0__Eukaryota															1
25eebaca21790e9386fedaa7c10aff40	OTU_343	D_0__Eukaryota	D_1__Archaeplastida	D_2__Rhodophyceae	D_3__Florideophycidae	D_4__Rhodymeniophycidae	D_5__Peyssonnelia										0.913285
3b29c593a697e0b3f52a6cf3b4daa357	OTU_344	D_0__Eukaryota	D_1__SAR	D_2__Alveolata	D_3__Dinoflagellata	D_4__Dinophyceae	D_5__Peridiniphycidae	D_6__Gonyaulacales	D_7__Ostreopsis	D_8__Ostreopsis cf. ovata	D_9__	D_10__	D_11__	D_12__	D_13__	D_14__	0.999998
2d69be85542c18dd4cd8e956f06f7828	OTU_345	D_0__Eukaryota	D_1__SAR	D_2__Stramenopiles	D_3__Ochrophyta	D_4__Diatomea	D_5__Bacillariophytina	D_6__Mediophyceae	D_7__Skeletonema	D_8__Skeletonema dohrnii	D_9__	D_10__	D_11__	D_12__	D_13__	D_14__	0.934304
f8e62de979b7b0cf67c2f1be9d827be9	OTU_346	D_0__Eukaryota	D_1__SAR	D_2__Alveolata	D_3__Protalveolata	D_4__Syndiniales	D_5__Syndiniales Group II	D_6__uncultured eukaryote	D_7__	D_8__	D_9__	D_10__	D_11__	D_12__	D_13__	D_14__	0.843751
0cba65ed7e33ec29055b481596f4cbd9	OTU_347	D_0__Eukaryota	D_1__SAR	D_2__Alveolata	D_3__Dinoflagellata	D_4__Dinophyceae	D_5__Gymnodiniphycidae	D_6__uncultured	D_7__uncultured eukaryote	D_8__	D_9__	D_10__	D_11__	D_12__	D_13__	D_14__	0.990414
2dd9a4ff64a0d1fafb05f1052db0ee26	OTU_348	D_0__Eukaryota	D_1__SAR	D_2__Alveolata													0.979337
e9fe2720262b33ef3ca8261b8a620fa5	OTU_349	D_0__Eukaryota	D_1__SAR	D_2__Stramenopiles	D_3__Ochrophyta	D_4__Diatomea	D_5__Bacillariophytina	D_6__Mediophyceae	D_7__uncultured	D_8__uncultured eukaryote	D_9__	D_10__	D_11__	D_12__	D_13__	D_14__	0.778703
152a4c536b348a7b9920dea2a8fb9b1d	OTU_350	D_0__Eukaryota	D_1__Opisthokonta														0.963557
eb06f7d971f3f08e8bdcc67766590be0	OTU_351	D_0__Eukaryota															1
fb712bae4a0cbc7fd8c41bd68dd393cb	OTU_352	D_0__Eukaryota	D_1__SAR	D_2__Alveolata	D_3__Dinoflagellata	D_4__uncultured eukaryote	D_5__	D_6__	D_7__	D_8__	D_9__	D_10__	D_11__	D_12__	D_13__	D_14__	0.971109
abfb6b0215ea7b54ca92773e98d1feb6	OTU_353	D_0__Eukaryota															1
77e801ea937ecd8f248b9a06f99d9c2f	OTU_354	D_0__Eukaryota	D_1__SAR	D_2__Stramenopiles													0.967098
a58550baa187d2b4c7b45d746b5e06ae	OTU_355	D_0__Eukaryota	D_1__SAR	D_2__Alveolata	D_3__Protalveolata	D_4__Syndiniales	D_5__Syndiniales Group I	D_6__uncultured eukaryote	D_7__	D_8__	D_9__	D_10__	D_11__	D_12__	D_13__	D_14__	0.771245
18e16567a88a334be6f07acbdeb934c7	OTU_356	D_0__Eukaryota	D_1__Opisthokonta	D_2__Holozoa	D_3__Metazoa (Animalia)												0.849753
724a904e55f8ada9a9a5f5ada358dc2b	OTU_357	D_0__Eukaryota	D_1__SAR	D_2__Stramenopiles	D_3__Labyrinthulomycetes												0.782055
8d094b64ae0fc968413bd36df216cae2	OTU_358	D_0__Eukaryota	D_1__Opisthokonta	D_2__Holozoa	D_3__Metazoa (Animalia)	D_4__Eumetazoa	D_5__Bilateria	D_6__Arthropoda	D_7__Crustacea	D_8__Maxillopoda	D_9__Copepoda	D_10__Poecilostomatoida	D_11__uncultured eukaryote	D_12__	D_13__	D_14__	0.999999
2a250085bc4abc09de46d9f789bbf5dd	OTU_359	D_0__Eukaryota	D_1__SAR	D_2__Stramenopiles	D_3__Ochrophyta	D_4__Diatomea	D_5__Bacillariophytina	D_6__Bacillariophyceae									0.756286
2966856de446720734969e3fa96f76a7	OTU_360	D_0__Eukaryota	D_1__SAR	D_2__Stramenopiles	D_3__Ochrophyta	D_4__Diatomea											0.994407
0d4c7c0d9eccb31e7c4edba54e81d44f	OTU_361	D_0__Eukaryota	D_1__SAR	D_2__Stramenopiles	D_3__Ochrophyta	D_4__Diatomea	D_5__Bacillariophytina	D_6__Bacillariophyceae									0.999758
a26190e65dbccc7ad8ed26889653a005	OTU_362	D_0__Eukaryota	D_1__SAR	D_2__Stramenopiles	D_3__Ochrophyta	D_4__Diatomea	D_5__Bacillariophytina	D_6__Mediophyceae	D_7__Skeletonema	D_8__Skeletonema dohrnii	D_9__	D_10__	D_11__	D_12__	D_13__	D_14__	0.985545
6d94bb7888da6d3d8c016bf46189e341	OTU_363	D_0__Eukaryota	D_1__SAR	D_2__Alveolata	D_3__Dinoflagellata	D_4__Dinophyceae	D_5__Gymnodiniphycidae	D_6__Gymnodinium clade	D_7__Woloszynskia	D_8__uncultured eukaryote	D_9__	D_10__	D_11__	D_12__	D_13__	D_14__	0.999967
9b8cd79da28f287b82fb068f84863a24	OTU_364	D_0__Eukaryota	D_1__SAR	D_2__Alveolata	D_3__Protalveolata	D_4__Syndiniales	D_5__Syndiniales Group I	D_6__uncultured Duboscquella	D_7__	D_8__	D_9__	D_10__	D_11__	D_12__	D_13__	D_14__	0.755746
24c1489c87322b29c8bbd440cd74b82b	OTU_365	D_0__Eukaryota															1
3b8c03e34bed4bb9a4633e5c0beeffb9	OTU_366	D_0__Eukaryota	D_1__Opisthokonta	D_2__Holozoa	D_3__Metazoa (Animalia)	D_4__Eumetazoa											1
23f6a3528c7ac3ba69bc5dc52525a312	OTU_367	D_0__Eukaryota	D_1__Opisthokonta	D_2__Holozoa	D_3__Metazoa (Animalia)	D_4__Eumetazoa	D_5__Bilateria	D_6__Xenacoelomorpha	D_7__Acoelomorpha	D_8__Acoela	D_9__Atriofronta polyvacuola	D_10__	D_11__	D_12__	D_13__	D_14__	1
21c065ac418c4ba9af57fef919cb18db	OTU_368	D_0__Eukaryota	D_1__SAR	D_2__Alveolata	D_3__Protalveolata	D_4__Syndiniales	D_5__Syndiniales Group I	D_6__uncultured eukaryote	D_7__	D_8__	D_9__	D_10__	D_11__	D_12__	D_13__	D_14__	0.772718
71fe1869d9f25853c69abd13f090e686	OTU_369	D_0__Eukaryota	D_1__SAR	D_2__Alveolata													0.989646
a3c0b2e38af026e01ec1547a5b4213db	OTU_370	D_0__Eukaryota	D_1__SAR	D_2__Stramenopiles	D_3__MAST-3	D_4__MAST-3I	D_5__uncultured stramenopile	D_6__	D_7__	D_8__	D_9__	D_10__	D_11__	D_12__	D_13__	D_14__	0.86552
efabc76b8a920cc5ec4e0f1d41ae4ec8	OTU_371	D_0__Eukaryota															1
db5c9d3ba8e4fdd4f2d162be14dba41d	OTU_372	D_0__Eukaryota	D_1__SAR	D_2__Rhizaria	D_3__Retaria	D_4__Acantharia	D_5__Symphyacanthida	D_6__Amphibelone	D_7__Amphibelone cultellata	D_8__	D_9__	D_10__	D_11__	D_12__	D_13__	D_14__	0.983305
282d164190b832d0992a2f1687259ebe	OTU_373	D_0__Eukaryota															1
4f86242c485cd8e5e553a07f413507b6	OTU_374	D_0__Eukaryota	D_1__SAR	D_2__Stramenopiles	D_3__Ochrophyta	D_4__Diatomea	D_5__Bacillariophytina	D_6__Bacillariophyceae									0.979696
75befa481fd5e782fb120514671cc546	OTU_375	D_0__Eukaryota	D_1__SAR	D_2__Stramenopiles	D_3__Peronosporomycetes												0.996899
f7cc92d84c661975b6df2ec3c020bb3c	OTU_376	D_0__Eukaryota															1
abf2d4b24e184b9b5df8c4337bfc131f	OTU_377	D_0__Eukaryota	D_1__Opisthokonta	D_2__Holozoa	D_3__Metazoa (Animalia)	D_4__Eumetazoa	D_5__Bilateria	D_6__Xenacoelomorpha	D_7__Acoelomorpha	D_8__Acoela	D_9__Simplicomorpha gigantorhabditis	D_10__	D_11__	D_12__	D_13__	D_14__	0.999998
453aa46cc6d7c67cbe6bb120478d3ad7	OTU_378	D_0__Eukaryota	D_1__Opisthokonta	D_2__Nucletmycea	D_3__Fungi	D_4__Dikarya	D_5__Ascomycota	D_6__Saccharomycotina	D_7__Saccharomycetes	D_8__Saccharomycetales	D_9__Debaryomycetaceae						0.954953
35ac6cd3e6ea9ccb69d69b579c9ca477	OTU_379	D_0__Eukaryota	D_1__SAR	D_2__Alveolata	D_3__Dinoflagellata	D_4__Dinophyceae											0.998222
6cc353e1b7eedfc2ca99b5fc236d13b1	OTU_380	D_0__Eukaryota	D_1__Opisthokonta	D_2__Holozoa	D_3__Metazoa (Animalia)	D_4__Eumetazoa	D_5__Bilateria	D_6__Arthropoda	D_7__Crustacea	D_8__Maxillopoda	D_9__Copepoda						0.963418
ea9325dbb18259b8fe8f8b9d88a834ab	OTU_381	D_0__Eukaryota															1
7bd4dac474f1a04eaf41d5562eb53cdc	OTU_382	D_0__Eukaryota															1
6b49b809832f1c7e6c9a80ec0353675c	OTU_383	D_0__Eukaryota	D_1__Opisthokonta	D_2__Holozoa	D_3__Metazoa (Animalia)	D_4__Porifera	D_5__Demospongiae	D_6__Dictyoceratida	D_7__Hippospongia communis (horse sponge)	D_8__	D_9__	D_10__	D_11__	D_12__	D_13__	D_14__	0.999993
78b3202e73f134130c6b370998d16bf8	OTU_384	D_0__Eukaryota	D_1__Opisthokonta	D_2__Holozoa	D_3__Metazoa (Animalia)	D_4__Eumetazoa	D_5__Bilateria	D_6__Arthropoda	D_7__Crustacea	D_8__Maxillopoda	D_9__Copepoda	D_10__Harpacticoida					0.950803
2caeb20165863b318c0e6f83814b4f71	OTU_385	D_0__Eukaryota	D_1__Opisthokonta	D_2__Holozoa	D_3__Metazoa (Animalia)	D_4__Eumetazoa	D_5__Bilateria	D_6__Arthropoda	D_7__Crustacea	D_8__Maxillopoda	D_9__Copepoda	D_10__Poecilostomatoida	D_11__uncultured eukaryote	D_12__	D_13__	D_14__	0.95677
b82d3256df072373be55327ded2e1d90	OTU_386	D_0__Eukaryota															1
41127b24b40994646d061f893c73782b	OTU_387	D_0__Eukaryota	D_1__SAR	D_2__Alveolata	D_3__Dinoflagellata	D_4__Dinophyceae	D_5__Gymnodiniphycidae	D_6__Ptychodiscus	D_7__uncultured eukaryote	D_8__	D_9__	D_10__	D_11__	D_12__	D_13__	D_14__	0.994202
7e243b69dee7bd70f5244edf5ab9db0e	OTU_388	D_0__Eukaryota	D_1__SAR	D_2__Alveolata	D_3__Ciliophora	D_4__Intramacronucleata	D_5__Spirotrichea	D_6__Oligotrichia									0.977242
c19ee1dad5fc576688b69e8fa0510a2f	OTU_389	D_0__Eukaryota	D_1__SAR	D_2__Stramenopiles	D_3__Labyrinthulomycetes												0.848884
b7dce79321148e4ded9ef214eba8f696	OTU_390	D_0__Eukaryota	D_1__SAR	D_2__Alveolata	D_3__Protalveolata	D_4__Syndiniales	D_5__Syndiniales Group II	D_6__uncultured marine alveolate	D_7__	D_8__	D_9__	D_10__	D_11__	D_12__	D_13__	D_14__	0.974942
ee44cf37a4df88b7d0a306bf454b3934	OTU_391	D_0__Eukaryota	D_1__SAR	D_2__Stramenopiles	D_3__Ochrophyta												0.904926
cf2b74490136717adef5c7490afcf78c	OTU_392	D_0__Eukaryota															1
d21a472b35011e861a0556a8fe64cc31	OTU_393	D_0__Eukaryota	D_1__Haptophyta	D_2__Prymnesiophyceae	D_3__Prymnesiales												0.975083
fd5e8b32976564e7e4885ec33d3b4a1a	OTU_394	D_0__Eukaryota	D_1__SAR	D_2__Stramenopiles	D_3__MAST-4	D_4__uncultured stramenopile	D_5__	D_6__	D_7__	D_8__	D_9__	D_10__	D_11__	D_12__	D_13__	D_14__	0.885536
1de252fc39747b72d7e242f4fe8e075a	OTU_395	D_0__Eukaryota	D_1__SAR	D_2__Alveolata	D_3__Dinoflagellata	D_4__Dinophyceae	D_5__Prorocentrales	D_6__Prorocentrum	D_7__uncultured eukaryote	D_8__	D_9__	D_10__	D_11__	D_12__	D_13__	D_14__	0.99968
5d17e338885b1ec761b34b9d7ab0da20	OTU_396	D_0__Eukaryota															1
7782e36da2fda468eb1cf9c66ae412d3	OTU_397	D_0__Eukaryota															1
88e30224ad1fefd37deb97568d76d6e6	OTU_398	D_0__Eukaryota	D_1__SAR														0.801257
903bddb3b827f681ba5966ce52c5d27a	OTU_399	D_0__Eukaryota	D_1__SAR	D_2__Stramenopiles													0.997371
1f3b8dc4dba86cb87e5eeb392125f1c7	OTU_400	D_0__Eukaryota	D_1__SAR	D_2__Stramenopiles	D_3__Ochrophyta	D_4__Diatomea	D_5__Coscinodiscophytina	D_6__Rhizosolenids	D_7__Leptocylindrus	D_8__Leptocylindrus danicus	D_9__	D_10__	D_11__	D_12__	D_13__	D_14__	1
704443ae9b5c011b20b376bd7a6ef40b	OTU_401	D_0__Eukaryota	D_1__Opisthokonta	D_2__Holozoa	D_3__Metazoa (Animalia)	D_4__Eumetazoa	D_5__Bilateria	D_6__Xenacoelomorpha	D_7__Acoelomorpha	D_8__Acoela							0.790491
ae9958ebd18f34fe82b69a3a6cfe7e7e	OTU_402	D_0__Eukaryota	D_1__SAR	D_2__Rhizaria	D_3__Retaria	D_4__Foraminifera	D_5__Globothalamea	D_6__Rotaliida									1
7bf5f0bd406ff08e30e28381fcd69881	OTU_403	D_0__Eukaryota	D_1__Archaeplastida	D_2__Rhodophyceae	D_3__Florideophycidae	D_4__Rhodymeniophycidae	D_5__Laurencia	D_6__Laurencia filiformis	D_7__	D_8__	D_9__	D_10__	D_11__	D_12__	D_13__	D_14__	0.917356
b39e52d21f8edcd3cc891ff4376635ed	OTU_404	D_0__Eukaryota															1
f310f29b23cf75e1310dd3f47e156405	OTU_405	D_0__Eukaryota	D_1__SAR	D_2__Stramenopiles	D_3__Ochrophyta	D_4__Diatomea	D_5__Bacillariophytina	D_6__Bacillariophyceae	D_7__Navicula	D_8__uncultured marine eukaryote	D_9__	D_10__	D_11__	D_12__	D_13__	D_14__	0.873536
11a72b2ff6f7f82ad92069605e42c087	OTU_406	D_0__Eukaryota															1
1c86e897a5d6cbd54858315548e8852a	OTU_407	D_0__Eukaryota	D_1__SAR	D_2__Alveolata													0.808685
788ed63e8066a91fd3937147c653eeb8	OTU_408	D_0__Eukaryota	D_1__SAR	D_2__Alveolata	D_3__Dinoflagellata	D_4__Dinophyceae											0.895544
58ffdff026ed9eae9592250139da9eff	OTU_409	D_0__Eukaryota															1
8afac727665a13c973b58d22b941bb30	OTU_410	D_0__Eukaryota	D_1__Opisthokonta	D_2__Holozoa	D_3__Metazoa (Animalia)	D_4__Eumetazoa	D_5__Bilateria	D_6__Annelida	D_7__Polychaeta	D_8__Scolecida	D_9__Terebellida	D_10__Lanice conchilega	D_11__	D_12__	D_13__	D_14__	0.99654
a143e3dab35f899571ca9adf619e4a2d	OTU_411	D_0__Eukaryota	D_1__SAR	D_2__Alveolata	D_3__Ciliophora	D_4__Intramacronucleata	D_5__Conthreep	D_6__Oligohymenophorea	D_7__Scuticociliatia	D_8__uncultured	D_9__uncultured eukaryote	D_10__	D_11__	D_12__	D_13__	D_14__	0.850042
f5541c7346a3ff512d140df27122e23b	OTU_412	D_0__Eukaryota															1
4948e47015808c04c86e81532535d66d	OTU_413	D_0__Eukaryota	D_1__SAR	D_2__Rhizaria	D_3__Retaria	D_4__Polycystinea	D_5__Spumellaria	D_6__uncultured eukaryote	D_7__	D_8__	D_9__	D_10__	D_11__	D_12__	D_13__	D_14__	0.940579
ef2a9c618622d22cdc5e79084cc60768	OTU_414	D_0__Eukaryota	D_1__Amoebozoa	D_2__Discosea	D_3__Flabellinia	D_4__Dactylopodida	D_5__Paramoeba	D_6__Paramoeba branchiphila	D_7__	D_8__	D_9__	D_10__	D_11__	D_12__	D_13__	D_14__	1
da5ad85b9def27d8834d3dea1bd49fe6	OTU_415	D_0__Eukaryota															1
b986b20bcb9d2b18fe644ab73298d562	OTU_416	D_0__Eukaryota	D_1__Archaeplastida	D_2__Rhodophyceae	D_3__Florideophycidae	D_4__Rhodymeniophycidae	D_5__Peyssonnelia										0.839614
05d02c8736aeec6168b48045a505d7a7	OTU_417	D_0__Eukaryota	D_1__Opisthokonta	D_2__Holozoa	D_3__Metazoa (Animalia)	D_4__Eumetazoa	D_5__Bilateria	D_6__Chordata	D_7__Tunicata	D_8__Appendicularia	D_9__Copelata	D_10__Oikopleuridae	D_11__uncultured eukaryote	D_12__	D_13__	D_14__	1
ebf267983507653256580a6172c88b8b	OTU_418	D_0__Eukaryota															1
1a05bc4618a091ab18e706a02e61468a	OTU_419	D_0__Eukaryota															1
26e100bd5459ac48a191aed7eb95245d	OTU_420	D_0__Eukaryota	D_1__Cryptophyceae	D_2__Kathablepharidae	D_3__Leucocryptos	D_4__uncultured eukaryote	D_5__	D_6__	D_7__	D_8__	D_9__	D_10__	D_11__	D_12__	D_13__	D_14__	0.960592
6a73668e63c57a87986a9e5bf89d9589	OTU_421	D_0__Eukaryota															1
251d981c03642add19b10fdf18f2256c	OTU_422	D_0__Eukaryota	D_1__Opisthokonta	D_2__Holozoa	D_3__Metazoa (Animalia)	D_4__Eumetazoa											1
89edd96d860ab3bf1f2a6f4c44ab5844	OTU_423	D_0__Eukaryota	D_1__Opisthokonta	D_2__Holozoa	D_3__Metazoa (Animalia)	D_4__Eumetazoa	D_5__Bilateria										0.734787
18c22f445da1b09fee4963a5549ef0ee	OTU_424	D_0__Eukaryota	D_1__Opisthokonta	D_2__Nucletmycea	D_3__Fungi	D_4__Dikarya	D_5__Ascomycota	D_6__Pezizomycotina	D_7__Dothideomycetes	D_8__Venturiales	D_9__Sympoventuriaceae	D_10__Ochroconis	D_11__Ochroconis constricta UM 578	D_12__	D_13__	D_14__	0.999996
28370ffd20bf615c741f381f6c49eaf5	OTU_425	D_0__Eukaryota	D_1__Opisthokonta	D_2__Holozoa	D_3__Metazoa (Animalia)	D_4__Eumetazoa	D_5__Bilateria	D_6__Gastrotricha	D_7__Chaetonotida	D_8__uncultured eukaryote	D_9__	D_10__	D_11__	D_12__	D_13__	D_14__	0.923939
4313c9b4d81e20c02e242203708537aa	OTU_426	D_0__Eukaryota	D_1__Haptophyta	D_2__Prymnesiophyceae	D_3__Phaeocystis	D_4__Phaeocystis globosa	D_5__	D_6__	D_7__	D_8__	D_9__	D_10__	D_11__	D_12__	D_13__	D_14__	0.999998
6071f7cfbd3f9a2f4fbdefb1f520a39a	OTU_427	D_0__Eukaryota	D_1__Opisthokonta	D_2__Holozoa	D_3__Metazoa (Animalia)	D_4__Eumetazoa	D_5__Bilateria	D_6__Xenacoelomorpha	D_7__Acoelomorpha	D_8__Acoela	D_9__Atriofronta polyvacuola	D_10__	D_11__	D_12__	D_13__	D_14__	1
6f22822b0c4350377321296633b4be48	OTU_428	D_0__Eukaryota	D_1__Opisthokonta	D_2__Holozoa	D_3__Metazoa (Animalia)	D_4__Porifera	D_5__Demospongiae	D_6__Tetractinellida	D_7__Cinachyrella schulzei	D_8__	D_9__	D_10__	D_11__	D_12__	D_13__	D_14__	0.940969
e6dace5a2ed442afda0b2570eab5349c	OTU_429	D_0__Eukaryota															1
e832aa290d834135f4c12c944fcede40	OTU_430	D_0__Eukaryota															1
2d8fb4ad74615a0ba9fdee4b658d253f	OTU_431	D_0__Eukaryota	D_1__SAR	D_2__Stramenopiles	D_3__Ochrophyta	D_4__Diatomea	D_5__Bacillariophytina	D_6__Bacillariophyceae									0.926834
1130e05812afa616d3500f57907fb0bf	OTU_432	D_0__Eukaryota	D_1__SAR	D_2__Rhizaria	D_3__Retaria	D_4__RAD A	D_5__uncultured eukaryote	D_6__	D_7__	D_8__	D_9__	D_10__	D_11__	D_12__	D_13__	D_14__	0.98684
0db1c793a803e7141de0e973544e4eaa	OTU_433	D_0__Eukaryota	D_1__SAR	D_2__Alveolata	D_3__Dinoflagellata	D_4__Dinophyceae											0.792014
0e9b5d0de00dc5aab758b271712d7d16	OTU_434	D_0__Eukaryota															1
373ac5e4f066ef9c1b22e2e9c476b8fa	OTU_435	D_0__Eukaryota	D_1__Opisthokonta	D_2__Holozoa	D_3__Metazoa (Animalia)	D_4__Eumetazoa	D_5__Bilateria	D_6__Platyhelminthes	D_7__Rhabditophora	D_8__Polycladida	D_9__uncultured eukaryote	D_10__	D_11__	D_12__	D_13__	D_14__	0.957158
25adfa544afb12845dc7cf0c21b497b1	OTU_436	D_0__Eukaryota	D_1__Opisthokonta	D_2__Holozoa	D_3__Ichthyosporea	D_4__Dermocystida	D_5__Rhinosporideacae	D_6__uncultured eukaryote	D_7__	D_8__	D_9__	D_10__	D_11__	D_12__	D_13__	D_14__	0.999999
20103694dddd38c827049b6b2854b403	OTU_437	D_0__Eukaryota	D_1__SAR	D_2__Alveolata	D_3__Dinoflagellata	D_4__Dinophyceae											0.865096
15ba90e9baa8f7a9e95deb0a0eb9ed2d	OTU_438	D_0__Eukaryota	D_1__SAR	D_2__Alveolata	D_3__Apicomplexa	D_4__Conoidasida	D_5__Coccidia	D_6__Eimeriorina	D_7__Sarcocystis								0.85548
62975506e1e7afbc23ac752d7ed5fc10	OTU_439	D_0__Eukaryota	D_1__Opisthokonta	D_2__Holozoa	D_3__Metazoa (Animalia)	D_4__Eumetazoa	D_5__Cnidaria	D_6__Anthozoa	D_7__Octocorallia								0.99423
4457586c83ad6814dde5e02aefa88882	OTU_440	D_0__Eukaryota	D_1__SAR	D_2__Alveolata	D_3__Dinoflagellata	D_4__Dinophyceae	D_5__Gymnodiniphycidae	D_6__Suessiaceae	D_7__Biecheleria	D_8__uncultured eukaryote	D_9__	D_10__	D_11__	D_12__	D_13__	D_14__	0.971947
353a31a60bef81bf60ac3c1e58a384b2	OTU_441	D_0__Eukaryota	D_1__Opisthokonta	D_2__Holozoa	D_3__Metazoa (Animalia)	D_4__Porifera	D_5__Demospongiae	D_6__Suberitida	D_7__Terpios aploos	D_8__	D_9__	D_10__	D_11__	D_12__	D_13__	D_14__	0.997979
cee135407a9a8524903bfa89ef5a35f6	OTU_442	D_0__Eukaryota	D_1__SAR	D_2__Alveolata	D_3__Protalveolata	D_4__Syndiniales	D_5__Syndiniales Group II										0.71913
a101ddc431762d49b3f540addf4280e2	OTU_443	D_0__Eukaryota	D_1__SAR	D_2__Stramenopiles	D_3__Ochrophyta	D_4__Diatomea	D_5__Bacillariophytina	D_6__Bacillariophyceae									0.998328
71de6f8e10ffa77a63fed961aadbf6bf	OTU_444	D_0__Eukaryota	D_1__SAR	D_2__Alveolata	D_3__Protalveolata	D_4__Syndiniales	D_5__Syndiniales Group I	D_6__uncultured marine eukaryote	D_7__	D_8__	D_9__	D_10__	D_11__	D_12__	D_13__	D_14__	0.961292
933e5625ee798b9d53fafc51e53963e2	OTU_445	D_0__Eukaryota	D_1__SAR	D_2__Alveolata													0.9592
8eea0581d5171c7ff32517145c266b0a	OTU_446	D_0__Eukaryota	D_1__SAR	D_2__Alveolata	D_3__Ciliophora	D_4__Intramacronucleata	D_5__Conthreep	D_6__Oligohymenophorea	D_7__Scuticociliatia	D_8__uncultured	D_9__uncultured eukaryote	D_10__	D_11__	D_12__	D_13__	D_14__	1
3ef12eea1ce9d2e93f1b66eadcb138db	OTU_447	D_0__Eukaryota	D_1__SAR	D_2__Alveolata													0.977399
efd00acc2c58c51a24115b9363fa894f	OTU_448	D_0__Eukaryota	D_1__SAR	D_2__Alveolata	D_3__Dinoflagellata	D_4__Dinophyceae											0.867935
056cd98f1078f4639f08978045ede2fa	OTU_449	D_0__Eukaryota	D_1__SAR	D_2__Alveolata	D_3__Protalveolata	D_4__Syndiniales	D_5__Syndiniales Group I										0.996999
8bf05ea87306f8c3331b867e35704245	OTU_450	D_0__Eukaryota	D_1__Opisthokonta	D_2__Holozoa	D_3__Metazoa (Animalia)	D_4__Eumetazoa	D_5__Bilateria										0.747796
0e417f6e70e6e0d3c81d0db22bc3a8a7	OTU_451	D_0__Eukaryota	D_1__Opisthokonta	D_2__Holozoa	D_3__Metazoa (Animalia)	D_4__Eumetazoa	D_5__Bilateria	D_6__Arthropoda	D_7__Crustacea	D_8__Maxillopoda	D_9__Copepoda	D_10__Harpacticoida					0.748765
9cd178bfa6c8cb09bd657971a05c96af	OTU_452	D_0__Eukaryota	D_1__Incertae Sedis	D_2__Palpitomonas	D_3__uncultured eukaryote	D_4__	D_5__	D_6__	D_7__	D_8__	D_9__	D_10__	D_11__	D_12__	D_13__	D_14__	1
9ec4ee42380a8ade4a2dabb966b51405	OTU_453	D_0__Eukaryota	D_1__Opisthokonta	D_2__Holozoa	D_3__Metazoa (Animalia)	D_4__Eumetazoa	D_5__Cnidaria	D_6__Hydrozoa	D_7__Hydroidolina								0.767597
2392907179e85936303ce5f757ece9ed	OTU_454	D_0__Eukaryota	D_1__SAR	D_2__Stramenopiles	D_3__Ochrophyta	D_4__Diatomea											0.99378
ca29fd934cb5a3b446ac00fbb97cd4c9	OTU_455	D_0__Eukaryota	D_1__SAR	D_2__Stramenopiles	D_3__Ochrophyta	D_4__Diatomea	D_5__Bacillariophytina										0.948097
55df871a858a775fef31daa34ed566ec	OTU_456	D_0__Eukaryota															1
50cf82b45fe1aa24f29de8ab6395ea22	OTU_457	D_0__Eukaryota															1
337452e0b54a56b488f4956b209d32d4	OTU_458	D_0__Eukaryota	D_1__Haptophyta	D_2__Prymnesiophyceae													0.743906
ab9f2c2d3873f3a9667683030abe5a56	OTU_459	D_0__Eukaryota	D_1__SAR	D_2__Rhizaria	D_3__Retaria	D_4__Foraminifera	D_5__Globothalamea	D_6__Rotaliida									1
6ec67ae010192eac32d993354d805fab	OTU_460	D_0__Eukaryota															1
8c9f538ebccb538f7054109d684d9a27	OTU_461	D_0__Eukaryota	D_1__Opisthokonta	D_2__Holozoa	D_3__Metazoa (Animalia)	D_4__Eumetazoa	D_5__Bilateria	D_6__Annelida	D_7__Polychaeta	D_8__Palpata	D_9__Phyllodocida	D_10__Branchiosyllis exilis	D_11__	D_12__	D_13__	D_14__	0.997539
e913e3bc44c22ec05811303da5639f61	OTU_462	D_0__Eukaryota	D_1__SAR	D_2__Alveolata	D_3__Apicomplexa	D_4__Conoidasida	D_5__Gregarinasina	D_6__Eugregarinorida	D_7__Lankesteria	D_8__Lankesteria metandrocarpae	D_9__	D_10__	D_11__	D_12__	D_13__	D_14__	0.980447
8070fd4a70bdf6a06ab26d8c794d0d52	OTU_463	D_0__Eukaryota	D_1__Opisthokonta	D_2__Nucletmycea	D_3__Fungi	D_4__Dikarya	D_5__Basidiomycota	D_6__Ustilaginomycotina	D_7__Ustilaginomycetes	D_8__Ustilaginales	D_9__Ustilaginaceae	D_10__Melanopsichium					0.706443
a6372f94aacbdc54de850fa5d70ff78d	OTU_464	D_0__Eukaryota	D_1__SAR	D_2__Stramenopiles	D_3__Ochrophyta	D_4__Chrysophyceae											0.959664
d8e8f83ae7c117c7c6013458973fdc13	OTU_465	D_0__Eukaryota	D_1__Opisthokonta	D_2__Holozoa	D_3__Metazoa (Animalia)	D_4__Eumetazoa	D_5__Bilateria	D_6__Chordata	D_7__Vertebrata	D_8__Gnathostomata	D_9__Euteleostomi	D_10__Actinopterygii	D_11__Neopterygii	D_12__Teleostei			0.977831
06550c3a8ea8244facc00753238a083c	OTU_466	D_0__Eukaryota	D_1__SAR	D_2__Alveolata													0.993984
8c6f1dbcd52023ab0a63c1b455ff7cbe	OTU_467	D_0__Eukaryota															1
aaed0be63ee7be7fd72f81c7b893cadc	OTU_468	D_0__Eukaryota	D_1__SAR	D_2__Stramenopiles	D_3__Ochrophyta	D_4__Diatomea	D_5__Bacillariophytina	D_6__Bacillariophyceae									0.970568
77479a2613c966348205eed5d34da8d4	OTU_469	D_0__Eukaryota	D_1__Archaeplastida	D_2__Chloroplastida	D_3__Charophyta	D_4__Phragmoplastophyta	D_5__Streptophyta	D_6__Embryophyta	D_7__Tracheophyta	D_8__Spermatophyta	D_9__Magnoliophyta						0.887577
093b169f8e23ca943d9a371dcf5ee22d	OTU_470	D_0__Eukaryota	D_1__Opisthokonta	D_2__Holozoa	D_3__Metazoa (Animalia)	D_4__Eumetazoa	D_5__Bilateria	D_6__Gastrotricha	D_7__Chaetonotida	D_8__uncultured eukaryote	D_9__	D_10__	D_11__	D_12__	D_13__	D_14__	0.889484
5b1ea6fd745efcd5212914af4c051129	OTU_471	D_0__Eukaryota															1
3f3d7ae34280ded4e73ecd8958eec6d4	OTU_472	D_0__Eukaryota	D_1__SAR	D_2__Stramenopiles	D_3__MAST-4	D_4__MAST-4A	D_5__uncultured stramenopile	D_6__	D_7__	D_8__	D_9__	D_10__	D_11__	D_12__	D_13__	D_14__	0.900242
cc65e928c7b68f81f8beacbfdb2c15b4	OTU_473	D_0__Eukaryota	D_1__SAR	D_2__Stramenopiles	D_3__Ochrophyta	D_4__Diatomea	D_5__Bacillariophytina	D_6__Bacillariophyceae									0.842498
0275b1638d3e5fd6528524cfc1603335	OTU_474	D_0__Eukaryota															1
dc95536c12a7fc8d8c1e8797a0a2da04	OTU_475	D_0__Eukaryota															1
33fd2f0e4735e44c3b24cd5a2e8ce0e7	OTU_476	D_0__Eukaryota	D_1__Opisthokonta	D_2__Holozoa	D_3__Metazoa (Animalia)	D_4__Porifera	D_5__Demospongiae	D_6__Poecilosclerida	D_7__Clathria reinwardti	D_8__	D_9__	D_10__	D_11__	D_12__	D_13__	D_14__	0.994937
028a85c62a9d0b34dbbf2e0a80108844	OTU_477	D_0__Eukaryota															1
280c358f5d081fd982d1f0e2253481aa	OTU_478	D_0__Eukaryota															1
52119c451a7d3122b1362278baf89f86	OTU_479	D_0__Eukaryota	D_1__Opisthokonta	D_2__Holozoa	D_3__Metazoa (Animalia)												0.96304
632588e3bfa0004ae901ed8e6a6aacbc	OTU_480	D_0__Eukaryota	D_1__Opisthokonta	D_2__Nucletmycea	D_3__Fungi	D_4__Dikarya	D_5__Basidiomycota	D_6__Agaricomycotina	D_7__Agaricomycetes	D_8__Agaricales							0.803753
c18d51aa1c8205622e7f327c2d6f2641	OTU_481	D_0__Eukaryota	D_1__SAR	D_2__Alveolata	D_3__Dinoflagellata	D_4__Dinophyceae	D_5__uncultured	D_6__uncultured eukaryote	D_7__	D_8__	D_9__	D_10__	D_11__	D_12__	D_13__	D_14__	0.945141
dfd876a9c873ea639b78712eea2562c2	OTU_482	D_0__Eukaryota	D_1__Opisthokonta	D_2__Holozoa	D_3__Metazoa (Animalia)	D_4__Eumetazoa	D_5__Bilateria	D_6__Mollusca	D_7__Gastropoda	D_8__Caenogastropoda							0.999817
264596c895032eae59ebeb39cf440ec1	OTU_483	D_0__Eukaryota	D_1__SAR	D_2__Alveolata	D_3__Protalveolata	D_4__Syndiniales											0.889956
68d963374a3b8a6fa382c30c9dfaaa02	OTU_484	D_0__Eukaryota	D_1__Opisthokonta	D_2__Holozoa													0.77821
e385fcc703b158f63351b5bad3f875da	OTU_485	D_0__Eukaryota															1
07e3da119fea715a18c19acf56cf5517	OTU_486	D_0__Eukaryota	D_1__SAR	D_2__Stramenopiles	D_3__Ochrophyta	D_4__Chrysophyceae											0.787613
84e68d8f5d41970a0a1d647e576b74fb	OTU_487	D_0__Eukaryota	D_1__Opisthokonta	D_2__Holozoa	D_3__Metazoa (Animalia)	D_4__Eumetazoa	D_5__Bilateria	D_6__Annelida	D_7__Polychaeta	D_8__Palpata	D_9__Sabellida	D_10__Owenia fusiformis	D_11__	D_12__	D_13__	D_14__	0.759526
605afd28953dac8f1c3988464b7fd56a	OTU_488	D_0__Eukaryota	D_1__Opisthokonta	D_2__Holozoa	D_3__Metazoa (Animalia)	D_4__Eumetazoa	D_5__Bilateria	D_6__Annelida	D_7__Polychaeta	D_8__Scolecida							0.790832
5a40634c745a83082e87c60dca683a5e	OTU_489	D_0__Eukaryota	D_1__Opisthokonta	D_2__Holozoa	D_3__Metazoa (Animalia)	D_4__Eumetazoa	D_5__Bilateria	D_6__Arthropoda	D_7__Crustacea	D_8__Maxillopoda	D_9__Copepoda						0.966389
cd4471864dd26828bacf86cf4fd1cc9a	OTU_490	D_0__Eukaryota	D_1__Opisthokonta	D_2__Holozoa	D_3__Metazoa (Animalia)	D_4__Eumetazoa	D_5__Bilateria	D_6__Annelida	D_7__Polychaeta	D_8__Palpata	D_9__Palpata Incertae Sedis	D_10__Protodrilus purpureus	D_11__	D_12__	D_13__	D_14__	0.997424
0bc0f191bc2dd86e43c5e3a54e48a61e	OTU_491	D_0__Eukaryota	D_1__Opisthokonta	D_2__Holozoa	D_3__Metazoa (Animalia)	D_4__Eumetazoa	D_5__Bilateria	D_6__Annelida	D_7__uncultured metazoan	D_8__	D_9__	D_10__	D_11__	D_12__	D_13__	D_14__	1
1f1f0de10257f4f4615a479fdd0fae75	OTU_492	D_0__Eukaryota	D_1__SAR	D_2__Stramenopiles	D_3__Ochrophyta	D_4__Diatomea	D_5__Bacillariophytina	D_6__Mediophyceae	D_7__Papiliocellulus	D_8__Papiliocellulus elegans	D_9__	D_10__	D_11__	D_12__	D_13__	D_14__	0.971141
70d5f93699b71fcd91e2901654be0d26	OTU_493	D_0__Eukaryota	D_1__SAR	D_2__Stramenopiles	D_3__Ochrophyta	D_4__Diatomea											0.973386
373523f6d7595d659ca00945a6af5f5d	OTU_494	D_0__Eukaryota	D_1__SAR	D_2__Stramenopiles	D_3__Ochrophyta	D_4__Diatomea											0.995722
02aae24ad79909c37054fcde2fc4f7b6	OTU_495	D_0__Eukaryota															1
c6959cebd5d0a6e681faf5525f7fd8f9	OTU_496	D_0__Eukaryota	D_1__Excavata	D_2__Discoba	D_3__Discicristata	D_4__Euglenozoa	D_5__Kinetoplastea	D_6__Metakinetoplastina									0.980441
887e93f69ed5eb0a2f9c69f36360d860	OTU_497	D_0__Eukaryota															1
97068a1b0f7c41767ab96ee7d0469904	OTU_498	D_0__Eukaryota	D_1__Opisthokonta	D_2__Holozoa	D_3__Metazoa (Animalia)	D_4__Eumetazoa	D_5__Bilateria										0.997111
935cd83be778a83ac5a97e9f42d4d957	OTU_499	D_0__Eukaryota															1
7e74ac5ec8691bc0af9ae276d1decc47	OTU_500	D_0__Eukaryota	D_1__Opisthokonta	D_2__Holozoa	D_3__Metazoa (Animalia)	D_4__Eumetazoa	D_5__Bilateria	D_6__Annelida	D_7__Polychaeta	D_8__Palpata	D_9__Phyllodocida						0.935768
57816ccc20327058ffad5e061f4bf0d5	OTU_501	D_0__Eukaryota	D_1__SAR	D_2__Alveolata	D_3__Protalveolata	D_4__Syndiniales	D_5__Syndiniales Group II	D_6__uncultured eukaryote	D_7__	D_8__	D_9__	D_10__	D_11__	D_12__	D_13__	D_14__	0.926397
5f05b5484ae20b7c39bd73468e6f298e	OTU_502	D_0__Eukaryota	D_1__Opisthokonta	D_2__Holozoa	D_3__Metazoa (Animalia)	D_4__Eumetazoa	D_5__Cnidaria	D_6__Anthozoa	D_7__Octocorallia	D_8__Alcyonacea							0.985553
e95454d35fcafb40ec42b92c16961e71	OTU_503	D_0__Eukaryota	D_1__Opisthokonta	D_2__Holozoa	D_3__Metazoa (Animalia)	D_4__Eumetazoa	D_5__Bilateria	D_6__Gastrotricha	D_7__Chaetonotida	D_8__uncultured eukaryote	D_9__	D_10__	D_11__	D_12__	D_13__	D_14__	0.817821
4dbb15f996f39fae5a4590f6f104edb0	OTU_504	D_0__Eukaryota	D_1__Opisthokonta	D_2__Holozoa	D_3__Metazoa (Animalia)	D_4__Eumetazoa	D_5__Bilateria	D_6__Mollusca	D_7__Bivalvia	D_8__Pteriomorphia	D_9__Mytiloida						0.999663
4bc50edfdd4625e2a1e4e8e675755da9	OTU_505	D_0__Eukaryota															1
ae41958165cdc978d6203fedb886b743	OTU_506	D_0__Eukaryota	D_1__Opisthokonta	D_2__Holozoa	D_3__Metazoa (Animalia)	D_4__Eumetazoa	D_5__Bilateria	D_6__Annelida	D_7__Polychaeta	D_8__Scolecida	D_9__Terebellida						0.995424
69373b349999a8b1b3fa180cf4a2c53a	OTU_507	D_0__Eukaryota															1
58b97bc1b5443edf021a627b0059e07e	OTU_508	D_0__Eukaryota	D_1__SAR	D_2__Stramenopiles	D_3__Ochrophyta	D_4__Diatomea	D_5__Bacillariophytina	D_6__Bacillariophyceae	D_7__Navicula	D_8__uncultured stramenopile	D_9__	D_10__	D_11__	D_12__	D_13__	D_14__	0.933976
a0f06ff65c1f93a44c30b77e2275473e	OTU_509	D_0__Eukaryota	D_1__SAR	D_2__Rhizaria	D_3__Retaria	D_4__Acantharia	D_5__Arthracanthida	D_6__Hexaconus	D_7__Acanthometra sp. 3 813	D_8__	D_9__	D_10__	D_11__	D_12__	D_13__	D_14__	0.999999
2f1d4184ad1c65c2768e8a61a7c5710c	OTU_510	D_0__Eukaryota	D_1__Opisthokonta	D_2__Holozoa	D_3__Metazoa (Animalia)	D_4__Eumetazoa	D_5__Bilateria	D_6__Xenacoelomorpha	D_7__Acoelomorpha	D_8__Acoela	D_9__Atriofronta polyvacuola	D_10__	D_11__	D_12__	D_13__	D_14__	1
c1be9383b46b9d5ea142411eea789249	OTU_511	D_0__Eukaryota	D_1__SAR	D_2__Alveolata	D_3__Dinoflagellata	D_4__Dinophyceae											0.99197
6dc47603253b2dbc881b4a1294b0e0b9	OTU_512	D_0__Eukaryota	D_1__SAR	D_2__Alveolata	D_3__Ciliophora	D_4__Intramacronucleata	D_5__Conthreep										0.954353
d3e90c47e29fd49c4fee2dc4ca7fc213	OTU_513	D_0__Eukaryota	D_1__SAR	D_2__Stramenopiles													0.975819
4f99e7c7639b50ba607f654229b22809	OTU_514	D_0__Eukaryota	D_1__Opisthokonta	D_2__Holozoa	D_3__Metazoa (Animalia)	D_4__Eumetazoa	D_5__Bilateria										0.940465
001499ab694ad963e8b7651247132234	OTU_515	D_0__Eukaryota	D_1__Opisthokonta	D_2__Holozoa	D_3__Metazoa (Animalia)	D_4__Porifera	D_5__Demospongiae	D_6__Haplosclerida	D_7__Haliclona amboinensis	D_8__	D_9__	D_10__	D_11__	D_12__	D_13__	D_14__	0.999961
424bea77c0a5b34ab04b61feb0b7c7bd	OTU_516	D_0__Eukaryota	D_1__Opisthokonta	D_2__Holozoa	D_3__Metazoa (Animalia)	D_4__Eumetazoa	D_5__Bilateria	D_6__Arthropoda	D_7__Crustacea	D_8__Maxillopoda	D_9__Copepoda						0.997559
5706aeeb1a050913516be3d13df14e47	OTU_517	D_0__Eukaryota															1
a728bc5eefb2353e503c025dee0c5d32	OTU_518	D_0__Eukaryota	D_1__Opisthokonta	D_2__Holozoa	D_3__Metazoa (Animalia)	D_4__Eumetazoa	D_5__Cnidaria	D_6__Hydrozoa	D_7__Hydroidolina	D_8__Leptothecata	D_9__Melicertum octocostatum	D_10__	D_11__	D_12__	D_13__	D_14__	0.949131
283e95966ccf11544cdde996c3e2d79e	OTU_519	D_0__Eukaryota	D_1__Opisthokonta	D_2__Holozoa	D_3__Metazoa (Animalia)	D_4__Eumetazoa	D_5__Cnidaria	D_6__Hydrozoa	D_7__Hydroidolina	D_8__Leptothecata	D_9__Halopteris carinata	D_10__	D_11__	D_12__	D_13__	D_14__	0.999995
3a5c9aa119682e2d1f7af613e4b1ec4f	OTU_520	D_0__Eukaryota	D_1__SAR	D_2__Stramenopiles	D_3__Ochrophyta	D_4__Diatomea	D_5__Bacillariophytina	D_6__Bacillariophyceae									0.95046
e2a0a60c543f7b722057459637933424	OTU_521	D_0__Eukaryota															1
8cd9bff6916de92ca87dbed7b11e14b4	OTU_522	D_0__Eukaryota	D_1__SAR	D_2__Alveolata	D_3__Dinoflagellata	D_4__Dinophyceae	D_5__Peridiniphycidae	D_6__Gonyaulacales	D_7__Azadinium	D_8__uncultured eukaryote	D_9__	D_10__	D_11__	D_12__	D_13__	D_14__	0.963367
f5f619d018f584848ea270f05bd7ef75	OTU_523	D_0__Eukaryota	D_1__SAR	D_2__Stramenopiles	D_3__Ochrophyta	D_4__Diatomea	D_5__Bacillariophytina	D_6__Bacillariophyceae									0.987306
34cb7f142fb947d91237c68917071b53	OTU_524	D_0__Eukaryota	D_1__Opisthokonta	D_2__Holozoa	D_3__Metazoa (Animalia)	D_4__Eumetazoa	D_5__Bilateria	D_6__Platyhelminthes	D_7__Rhabditophora								0.810154
c770fca68d010bdcf75058d0c5d721ee	OTU_525	D_0__Eukaryota	D_1__Opisthokonta	D_2__Holozoa													0.706226
88ba81c50184213843c505d2c850c612	OTU_526	D_0__Eukaryota	D_1__SAR	D_2__Stramenopiles													0.996009
95c7615eba43a036a2869d4f885474d0	OTU_527	D_0__Eukaryota	D_1__SAR	D_2__Rhizaria	D_3__Cercozoa	D_4__Chlorarachniophyta	D_5__uncultured	D_6__uncultured eukaryote	D_7__	D_8__	D_9__	D_10__	D_11__	D_12__	D_13__	D_14__	0.999988
5c9726ec62f0ab60f8be439fe3dbeb11	OTU_528	D_0__Eukaryota	D_1__Excavata	D_2__Discoba	D_3__Discicristata	D_4__Euglenozoa	D_5__Kinetoplastea	D_6__Metakinetoplastina	D_7__Neobodonida	D_8__Neobodo							0.999977
95d27966899c19c82ed4da094dc17843	OTU_529	D_0__Eukaryota	D_1__Opisthokonta	D_2__Nucletmycea	D_3__Fungi	D_4__Dikarya	D_5__Ascomycota	D_6__Pezizomycotina	D_7__Dothideomycetes	D_8__Pleosporales							0.831798
a09693d5064e72cb65f2d9434b2abddb	OTU_530	D_0__Eukaryota															1
25b39660a107358bf89fbf3e8691d3f7	OTU_531	D_0__Eukaryota	D_1__Opisthokonta	D_2__Holozoa	D_3__Metazoa (Animalia)	D_4__Eumetazoa	D_5__Bilateria	D_6__Arthropoda	D_7__Crustacea	D_8__Maxillopoda	D_9__Copepoda	D_10__Calanoida	D_11__uncultured eukaryote	D_12__	D_13__	D_14__	0.882698
7e51f2340d0ba6d8057382c756206a6f	OTU_532	D_0__Eukaryota	D_1__Archaeplastida	D_2__Chloroplastida	D_3__Chlorophyta	D_4__Ulvophyceae	D_5__marine metagenome	D_6__	D_7__	D_8__	D_9__	D_10__	D_11__	D_12__	D_13__	D_14__	0.999999
839b7d8666745cba72a3c6554deaf34b	OTU_533	D_0__Eukaryota	D_1__Opisthokonta	D_2__Holozoa	D_3__Metazoa (Animalia)	D_4__Eumetazoa	D_5__Bilateria	D_6__Annelida	D_7__Polychaeta	D_8__Palpata	D_9__Phyllodocida	D_10__Exogone haswelli	D_11__	D_12__	D_13__	D_14__	0.993761
5bcd04e36d379f29f90eebbdb6ff422a	OTU_534	D_0__Eukaryota	D_1__SAR	D_2__Stramenopiles	D_3__MAST-1	D_4__MAST-1A	D_5__uncultured eukaryote	D_6__	D_7__	D_8__	D_9__	D_10__	D_11__	D_12__	D_13__	D_14__	0.999999
ed1b2f4787fb0cb2367ef13e093f9198	OTU_535	D_0__Eukaryota	D_1__SAR	D_2__Alveolata													0.984704
a11b83c6796ec23313b55e6453bb6e4b	OTU_536	D_0__Eukaryota	D_1__SAR	D_2__Stramenopiles	D_3__Ochrophyta	D_4__Diatomea	D_5__Bacillariophytina	D_6__Bacillariophyceae									0.995998
f9a007449cc798b43105cb372b2b2a6f	OTU_537	D_0__Eukaryota	D_1__SAR	D_2__Rhizaria	D_3__Retaria	D_4__Foraminifera	D_5__Globothalamea	D_6__Rotaliida									1
8172987f3965ed319a01369cd6e3a94f	OTU_538	D_0__Eukaryota															1
a746d101e707628e4867c322b65e3f96	OTU_539	D_0__Eukaryota	D_1__Opisthokonta														0.917162
abb1db335fab5c5a238c805c7c332e06	OTU_540	D_0__Eukaryota	D_1__SAR	D_2__Stramenopiles													0.98964
d02f85a0e377e8225d827aad7e03906e	OTU_541	D_0__Eukaryota	D_1__Incertae Sedis	D_2__Palpitomonas	D_3__uncultured eukaryote	D_4__	D_5__	D_6__	D_7__	D_8__	D_9__	D_10__	D_11__	D_12__	D_13__	D_14__	1
1aa43fd090eb330597f9f23d120e5ddb	OTU_542	D_0__Eukaryota															1
b71e04c0968f2cc8e6dce619953a8831	OTU_543	D_0__Eukaryota	D_1__Opisthokonta	D_2__Holozoa	D_3__Metazoa (Animalia)	D_4__Porifera	D_5__Demospongiae	D_6__Tethyida	D_7__Demospongiae sp. G4 AGC 1998	D_8__	D_9__	D_10__	D_11__	D_12__	D_13__	D_14__	0.999497
9dd94e233e962dfa2d0374ecd11db0d7	OTU_544	D_0__Eukaryota	D_1__SAR	D_2__Alveolata	D_3__Dinoflagellata												0.760581
bc20be18be1e75734896e83b30c7d9cf	OTU_545	D_0__Eukaryota	D_1__SAR	D_2__Alveolata													0.999938
fa02c441368cb40b9e2d593ee821d2c9	OTU_546	D_0__Eukaryota															1
26ccd5fdadcb7bf52e4375a4c2f169af	OTU_547	D_0__Eukaryota	D_1__Opisthokonta	D_2__Holozoa	D_3__Metazoa (Animalia)	D_4__Eumetazoa	D_5__Bilateria	D_6__Annelida	D_7__Polychaeta	D_8__Palpata							0.758966
8cb7dd0b7b2a149ee98739cf6cf24d5e	OTU_548	D_0__Eukaryota	D_1__SAR	D_2__Stramenopiles	D_3__MAST-3	D_4__MAST-3I	D_5__uncultured stramenopile	D_6__	D_7__	D_8__	D_9__	D_10__	D_11__	D_12__	D_13__	D_14__	0.994113
bb8a7ab16788270baa81429afb8d4671	OTU_549	D_0__Eukaryota	D_1__Opisthokonta	D_2__Holozoa	D_3__Metazoa (Animalia)	D_4__Eumetazoa	D_5__Bilateria	D_6__Arthropoda	D_7__Crustacea	D_8__Maxillopoda	D_9__Copepoda						0.995221
864ffa0b98f03a6e2c75a1f7a1ecb9f3	OTU_550	D_0__Eukaryota	D_1__SAR	D_2__Alveolata													0.9864
ee1af23a4cd4b0c82b11d288b80c12df	OTU_551	D_0__Eukaryota	D_1__Opisthokonta	D_2__Holozoa	D_3__Metazoa (Animalia)	D_4__Eumetazoa											0.889568
d88431af5a1eac2c88bcbaa57e8fa9ca	OTU_552	D_0__Eukaryota	D_1__Opisthokonta	D_2__Holozoa	D_3__Metazoa (Animalia)	D_4__Eumetazoa	D_5__Bilateria	D_6__Xenacoelomorpha	D_7__Acoelomorpha	D_8__Acoela	D_9__Atriofronta polyvacuola	D_10__	D_11__	D_12__	D_13__	D_14__	1
8171027641573b02e8b3c9d3ec0c47c8	OTU_553	D_0__Eukaryota	D_1__SAR	D_2__Alveolata	D_3__Dinoflagellata	D_4__Dinophyceae											0.813494
a93e81e6c54c4c082bbee8982c754e81	OTU_554	D_0__Eukaryota															1
532cf79f7d43819a10619f5b651d5d68	OTU_555	D_0__Eukaryota	D_1__Opisthokonta	D_2__Holozoa	D_3__Metazoa (Animalia)	D_4__Eumetazoa	D_5__Bilateria	D_6__Mollusca	D_7__Gastropoda	D_8__Caenogastropoda							0.999959
d87e1c02e01657ef25513948f0755e14	OTU_556	D_0__Eukaryota	D_1__SAR	D_2__Alveolata													0.819107
cbfe2622ad703cdb99554309a6e775b6	OTU_557	D_0__Eukaryota	D_1__Opisthokonta	D_2__Nucletmycea	D_3__Fungi	D_4__Dikarya	D_5__Basidiomycota	D_6__Agaricomycotina	D_7__Agaricomycetes								0.757948
d7c2f70adcb767449fdd79c0e1e66bad	OTU_558	D_0__Eukaryota															1
30e6332e27b50d361dc68d92c1ca97ec	OTU_559	D_0__Eukaryota	D_1__Opisthokonta	D_2__Nucletmycea	D_3__Fungi	D_4__Dikarya	D_5__Ascomycota	D_6__Pezizomycotina	D_7__Dothideomycetes	D_8__Capnodiales							0.986602
46813096eafce60c9ae52f1e765634d4	OTU_560	D_0__Eukaryota	D_1__Opisthokonta	D_2__Holozoa	D_3__Metazoa (Animalia)	D_4__Eumetazoa	D_5__Bilateria										0.855993
dd754b20ce1a517571f4c606ff869486	OTU_561	D_0__Eukaryota	D_1__Opisthokonta	D_2__Holozoa	D_3__Metazoa (Animalia)	D_4__Eumetazoa	D_5__Bilateria	D_6__Annelida	D_7__Polychaeta	D_8__Scolecida	D_9__Spionida	D_10__Chaetopterus cf. luteus KJO-2005	D_11__	D_12__	D_13__	D_14__	0.999544
f0facc759b1815c9a8f55def361932f0	OTU_562	D_0__Eukaryota															1
ad55abb18968ebd07a4ad5ae7d47788c	OTU_563	D_0__Eukaryota	D_1__Haptophyta	D_2__Prymnesiophyceae	D_3__Prymnesiales	D_4__Chrysochromulina	D_5__uncultured marine picoeukaryote	D_6__	D_7__	D_8__	D_9__	D_10__	D_11__	D_12__	D_13__	D_14__	0.999999
34d7b239f5bd48c5e60a44b9253538af	OTU_564	D_0__Eukaryota	D_1__Opisthokonta	D_2__Nucletmycea	D_3__Fungi	D_4__Dikarya	D_5__Basidiomycota	D_6__Agaricomycotina	D_7__Agaricomycetes	D_8__Polyporales	D_9__Coriolaceae	D_10__Rigidoporus	D_11__Rigidoporus microporus	D_12__	D_13__	D_14__	0.999785
2d6aa446c65d1d2bf30430247770ae91	OTU_565	D_0__Eukaryota	D_1__SAR	D_2__Alveolata	D_3__Protalveolata	D_4__Incertae Sedis	D_5__Ellobiopsidae	D_6__Ellobiopsis	D_7__Ellobiopsis chattonii	D_8__	D_9__	D_10__	D_11__	D_12__	D_13__	D_14__	0.902172
24e039ceed3aebcd30baaa94e7d273a6	OTU_566	D_0__Eukaryota	D_1__Opisthokonta	D_2__Holozoa	D_3__Metazoa (Animalia)	D_4__Eumetazoa	D_5__Bilateria	D_6__Annelida	D_7__Polychaeta	D_8__Scolecida	D_9__Spionida	D_10__Chaetopterus cf. luteus KJO-2005	D_11__	D_12__	D_13__	D_14__	0.998857
da50da58eb178fcfaab6816b4193bfe6	OTU_567	D_0__Eukaryota															1
4bf57ff2b67c4e55b8da185eff2c657b	OTU_568	D_0__Eukaryota															1
f9fe853e51aaab012095bf04f62b3186	OTU_569	D_0__Eukaryota	D_1__SAR	D_2__Alveolata	D_3__Dinoflagellata	D_4__Dinophyceae											0.828933
0a6197214ca9d8d51b74ba1c966ba31b	OTU_570	D_0__Eukaryota	D_1__Opisthokonta	D_2__Holozoa	D_3__Metazoa (Animalia)	D_4__Eumetazoa	D_5__Bilateria	D_6__Arthropoda	D_7__Crustacea	D_8__Maxillopoda	D_9__Copepoda	D_10__Cyclopoida	D_11__uncultured eukaryote	D_12__	D_13__	D_14__	0.996391
d00ae90b4143c4c03981436ce3736227	OTU_571	D_0__Eukaryota	D_1__SAR	D_2__Stramenopiles	D_3__Ochrophyta	D_4__Diatomea	D_5__Coscinodiscophytina	D_6__Fragilariales	D_7__Licmophora	D_8__Licmophora flabellata	D_9__	D_10__	D_11__	D_12__	D_13__	D_14__	0.94624
7098f446d4f5b2892f3a464b1c563298	OTU_572	D_0__Eukaryota															1
2d4c76ae4cc97ad763e4d68b71e07d63	OTU_573	D_0__Eukaryota	D_1__SAR	D_2__Stramenopiles	D_3__Ochrophyta	D_4__Diatomea	D_5__Bacillariophytina	D_6__Bacillariophyceae	D_7__Navicula	D_8__uncultured marine eukaryote	D_9__	D_10__	D_11__	D_12__	D_13__	D_14__	0.856113
df05fad662bfae186b0ac26aee6d0205	OTU_574	D_0__Eukaryota	D_1__SAR	D_2__Alveolata	D_3__Protalveolata	D_4__Syndiniales	D_5__Syndiniales Group II	D_6__uncultured marine eukaryote	D_7__	D_8__	D_9__	D_10__	D_11__	D_12__	D_13__	D_14__	0.786199
963dd589c1e576b21fcf7d71cd1ece6e	OTU_575	D_0__Eukaryota	D_1__SAR	D_2__Rhizaria	D_3__Cercozoa	D_4__Novel Clade 2	D_5__uncultured eukaryote	D_6__	D_7__	D_8__	D_9__	D_10__	D_11__	D_12__	D_13__	D_14__	0.881771
896d2960797e3ba4da7b7a146ca20f54	OTU_576	D_0__Eukaryota	D_1__Opisthokonta	D_2__Holozoa	D_3__Metazoa (Animalia)	D_4__Eumetazoa	D_5__Bilateria	D_6__Arthropoda	D_7__Crustacea	D_8__Maxillopoda	D_9__Copepoda						0.992361
4b99f0b73f42c11f1bdf3f4eef59e56b	OTU_577	D_0__Eukaryota															1
dea3a55fb127aa585359239e8bbe4627	OTU_578	D_0__Eukaryota	D_1__SAR	D_2__Alveolata													0.965984
bed46273f58938e596be6ad8e9508498	OTU_579	D_0__Eukaryota	D_1__SAR	D_2__Stramenopiles	D_3__Ochrophyta	D_4__Diatomea											0.986503
71a29403d95c0dea76232774df6c080b	OTU_580	D_0__Eukaryota	D_1__Opisthokonta	D_2__Holozoa	D_3__Metazoa (Animalia)	D_4__Eumetazoa	D_5__Bilateria	D_6__Annelida	D_7__Polychaeta	D_8__Palpata	D_9__Phyllodocida	D_10__Lepidonotus sublevis	D_11__	D_12__	D_13__	D_14__	0.703509
ac348093582dab652df753f69b79bce3	OTU_581	D_0__Eukaryota	D_1__Opisthokonta	D_2__Holozoa	D_3__Metazoa (Animalia)	D_4__Eumetazoa	D_5__Bilateria	D_6__Chordata	D_7__Vertebrata	D_8__Gnathostomata	D_9__Euteleostomi	D_10__Actinopterygii	D_11__Neopterygii	D_12__Teleostei			0.978476
dab0513e47a618142541d94ec51b3aad	OTU_582	D_0__Eukaryota	D_1__SAR	D_2__Rhizaria	D_3__Retaria	D_4__RAD B	D_5__uncultured eukaryote	D_6__	D_7__	D_8__	D_9__	D_10__	D_11__	D_12__	D_13__	D_14__	0.735742
808255e8c86aa027a8cf796aadb08278	OTU_583	D_0__Eukaryota	D_1__Opisthokonta	D_2__Holozoa	D_3__Metazoa (Animalia)	D_4__Eumetazoa	D_5__Bilateria	D_6__Arthropoda	D_7__Crustacea	D_8__Maxillopoda	D_9__Copepoda	D_10__Harpacticoida					0.77387
b68e59735b5c37c8f548599a3e7ec667	OTU_584	D_0__Eukaryota	D_1__SAR	D_2__Alveolata	D_3__Protalveolata	D_4__Syndiniales	D_5__Syndiniales Group I	D_6__uncultured eukaryote	D_7__	D_8__	D_9__	D_10__	D_11__	D_12__	D_13__	D_14__	0.988748
48524324aa0629eae0568f1a40250f10	OTU_585	D_0__Eukaryota	D_1__Opisthokonta	D_2__Holozoa	D_3__Metazoa (Animalia)	D_4__Eumetazoa	D_5__Bilateria	D_6__Arthropoda	D_7__Crustacea	D_8__Maxillopoda	D_9__Copepoda	D_10__Cyclopoida	D_11__Lichomolgus canui	D_12__	D_13__	D_14__	0.999829
0a2c9d4e07a012f9328939275c7f6137	OTU_586	D_0__Eukaryota	D_1__SAR	D_2__Alveolata	D_3__Ciliophora	D_4__Intramacronucleata	D_5__Conthreep	D_6__Phyllopharyngea	D_7__Cyrtophoria								0.976733
b8a77c6ed1011b28720e0ad6dc718ab5	OTU_587	D_0__Eukaryota	D_1__SAR	D_2__Stramenopiles	D_3__Ochrophyta	D_4__Diatomea	D_5__Bacillariophytina	D_6__Mediophyceae	D_7__Triceratium	D_8__Biddulphia sp. MACC 6	D_9__	D_10__	D_11__	D_12__	D_13__	D_14__	0.999929
2d617d1708f00a33a8b5dbf62ee9dbf3	OTU_588	D_0__Eukaryota	D_1__SAR	D_2__Alveolata	D_3__Dinoflagellata	D_4__Dinophyceae											0.861668
7d62eb7f2bf3db0d2d2bbae386a6cd4b	OTU_589	D_0__Eukaryota															1
68784014279d500fa3bf942844b83ebc	OTU_590	D_0__Eukaryota	D_1__SAR	D_2__Stramenopiles	D_3__MAST-1	D_4__MAST-1C	D_5__uncultured eukaryote	D_6__	D_7__	D_8__	D_9__	D_10__	D_11__	D_12__	D_13__	D_14__	0.995913
babb8e6dd90317c735d9231c32a3e985	OTU_591	D_0__Eukaryota	D_1__SAR	D_2__Rhizaria	D_3__Cercozoa	D_4__Thecofilosea	D_5__Cryomonadida	D_6__Protaspidae	D_7__Protaspis	D_8__Protaspis sp. CC-2009c	D_9__	D_10__	D_11__	D_12__	D_13__	D_14__	0.83547
3c98b5086616a529b91a561a646c7c0a	OTU_592	D_0__Eukaryota	D_1__SAR	D_2__Alveolata													0.991321
431cccda114f6f0389f091e1a7b7b997	OTU_593	D_0__Eukaryota															1
3340b0ed44becd19407a4934a90e2926	OTU_594	D_0__Eukaryota	D_1__SAR	D_2__Alveolata	D_3__uncultured	D_4__uncultured eukaryote	D_5__	D_6__	D_7__	D_8__	D_9__	D_10__	D_11__	D_12__	D_13__	D_14__	0.767754
b23e5326f5a186bebc5b8f2162084452	OTU_595	D_0__Eukaryota	D_1__SAR	D_2__Stramenopiles													0.975383
25eae04c09dbb701d350e55d3f4b6c76	OTU_596	D_0__Eukaryota	D_1__Opisthokonta	D_2__Holozoa	D_3__Metazoa (Animalia)	D_4__Eumetazoa											0.727602
2af4b562bb3d0254d5c746e746d2e249	OTU_597	D_0__Eukaryota	D_1__SAR	D_2__Alveolata	D_3__Dinoflagellata	D_4__Dinophyceae											0.972417
34dbd5f5bae2b78f3dd563a8dcc11b24	OTU_598	D_0__Eukaryota	D_1__Opisthokonta	D_2__Nucletmycea	D_3__Fungi	D_4__Dikarya	D_5__Basidiomycota	D_6__Ustilaginomycotina	D_7__Malasseziomycetes	D_8__Malasseziales	D_9__Malasseziaceae	D_10__Malassezia	D_11__Malassezia japonica	D_12__	D_13__	D_14__	0.897373
85da5389b2d9152ac3dfd90f3cbcb092	OTU_599	D_0__Eukaryota															1
08a1ccd1c0781806842af37e5277fd85	OTU_600	D_0__Eukaryota	D_1__SAR	D_2__Alveolata	D_3__Dinoflagellata	D_4__Dinophyceae											0.820572
978354eb646747ae332b91602799d174	OTU_601	D_0__Eukaryota															1
5651f66cd835ebc4e865b9f6fa437f72	OTU_602	D_0__Eukaryota	D_1__SAR	D_2__Alveolata	D_3__Dinoflagellata	D_4__uncultured eukaryote	D_5__	D_6__	D_7__	D_8__	D_9__	D_10__	D_11__	D_12__	D_13__	D_14__	0.999631
d180c47898a74428c49a963569da1209	OTU_603	D_0__Eukaryota	D_1__Opisthokonta	D_2__Holozoa	D_3__Metazoa (Animalia)	D_4__Eumetazoa	D_5__Bilateria	D_6__Gastrotricha	D_7__Chaetonotida								0.916732
1a4cd1e9355816f66e14402939155e46	OTU_604	D_0__Eukaryota	D_1__Opisthokonta	D_2__Holozoa	D_3__Metazoa (Animalia)	D_4__Porifera	D_5__Demospongiae	D_6__Haplosclerida	D_7__Haliclona sp. NBL-2014	D_8__	D_9__	D_10__	D_11__	D_12__	D_13__	D_14__	1
97f701d88be05151e37873cd5255fc38	OTU_605	D_0__Eukaryota	D_1__SAR	D_2__Alveolata	D_3__Ciliophora	D_4__Intramacronucleata	D_5__Spirotrichea	D_6__Choreotrichia									0.999996
054cbb6c05bd74589cc9631d902ddce9	OTU_606	D_0__Eukaryota	D_1__SAR	D_2__Alveolata	D_3__uncultured	D_4__uncultured eukaryote	D_5__	D_6__	D_7__	D_8__	D_9__	D_10__	D_11__	D_12__	D_13__	D_14__	0.777219
a8bc8ac5eea5d5a0cad157ae47d87d47	OTU_607	D_0__Eukaryota	D_1__Opisthokonta	D_2__Holozoa	D_3__Metazoa (Animalia)	D_4__Porifera	D_5__Demospongiae	D_6__Suberitida	D_7__Terpios aploos	D_8__	D_9__	D_10__	D_11__	D_12__	D_13__	D_14__	0.999105
6cfb7b2a4d53a270f0089fdcd5f5fd52	OTU_608	D_0__Eukaryota	D_1__SAR	D_2__Stramenopiles	D_3__MAST-7												0.998031
31fbd39f762958d1f72f956e78a2dd6c	OTU_609	D_0__Eukaryota	D_1__Opisthokonta	D_2__Nucletmycea	D_3__Fungi	D_4__Dikarya	D_5__Basidiomycota	D_6__Agaricomycotina	D_7__Agaricomycetes	D_8__Agaricales	D_9__Hygrophoraceae						0.755626
51bcc3ced9d3f1cfa2d8171a9d6c28ca	OTU_610	D_0__Eukaryota	D_1__SAR	D_2__Stramenopiles	D_3__Ochrophyta	D_4__Diatomea	D_5__Bacillariophytina	D_6__Mediophyceae	D_7__Lithodesmium	D_8__Lithodesmium undulatum	D_9__	D_10__	D_11__	D_12__	D_13__	D_14__	0.999928
778fed140bed0452193e83f12ee46ced	OTU_611	D_0__Eukaryota	D_1__SAR	D_2__Stramenopiles	D_3__MAST-3	D_4__MAST-3F	D_5__uncultured stramenopile	D_6__	D_7__	D_8__	D_9__	D_10__	D_11__	D_12__	D_13__	D_14__	0.908099
e21b13cd07b63673de140dedbd8735da	OTU_612	D_0__Eukaryota	D_1__Opisthokonta	D_2__Holozoa	D_3__Metazoa (Animalia)	D_4__Eumetazoa	D_5__Bilateria										0.992653
f86c4ffbe1241020f4274e7feb8f4b4e	OTU_613	D_0__Eukaryota	D_1__SAR	D_2__Stramenopiles	D_3__Ochrophyta	D_4__Diatomea	D_5__Bacillariophytina	D_6__Bacillariophyceae	D_7__Navicula								0.74399
5b834f21ad8a1af0a25bbe89445431b3	OTU_614	D_0__Eukaryota	D_1__SAR	D_2__Stramenopiles	D_3__Ochrophyta												0.88964
8b90759da3f7640e17d789f1ba1d39ee	OTU_615	D_0__Eukaryota															1
c2d30eb2014ebed012998def32f28faa	OTU_616	D_0__Eukaryota	D_1__SAR	D_2__Alveolata	D_3__Protalveolata	D_4__Syndiniales	D_5__Syndiniales Group I	D_6__uncultured eukaryote	D_7__	D_8__	D_9__	D_10__	D_11__	D_12__	D_13__	D_14__	0.756584
0ae2e6ff64fd166e878d77f30cc32ff2	OTU_617	D_0__Eukaryota	D_1__SAR	D_2__Alveolata													0.998857
2622dbf474dbe6430d0769555311160b	OTU_618	D_0__Eukaryota	D_1__SAR	D_2__Stramenopiles	D_3__Ochrophyta	D_4__Chrysophyceae											0.962514
d692de5c0adedcd572a682eade41c59e	OTU_619	D_0__Eukaryota	D_1__SAR	D_2__Stramenopiles	D_3__Ochrophyta	D_4__Diatomea	D_5__Bacillariophytina	D_6__Bacillariophyceae									0.992677
219519f60a3e658d986de6e45782b8da	OTU_620	D_0__Eukaryota	D_1__Opisthokonta	D_2__Holozoa	D_3__Metazoa (Animalia)	D_4__Eumetazoa	D_5__Bilateria	D_6__Chordata	D_7__Tunicata	D_8__Appendicularia	D_9__Copelata	D_10__Oikopleuridae					0.999997
dbb4da4e5e1378c90f852ce8fa15e07d	OTU_621	D_0__Eukaryota	D_1__Archaeplastida	D_2__Chloroplastida	D_3__Chlorophyta	D_4__Mamiellophyceae	D_5__Mamiellales	D_6__Bathycoccus	D_7__Bathycoccus prasinos	D_8__	D_9__	D_10__	D_11__	D_12__	D_13__	D_14__	0.8903
e86cbcd25df83bc6ed0f8ab816370504	OTU_622	D_0__Eukaryota															1
021202e85c97b1de24bf0e35e4abfd74	OTU_623	D_0__Eukaryota	D_1__Opisthokonta	D_2__Holozoa	D_3__Metazoa (Animalia)	D_4__Eumetazoa	D_5__Bilateria	D_6__Annelida	D_7__Polychaeta								0.734184
b205ac8083816585d2360662d0dcfcb9	OTU_624	D_0__Eukaryota	D_1__Opisthokonta	D_2__Holozoa	D_3__Metazoa (Animalia)	D_4__Eumetazoa	D_5__Bilateria	D_6__Arthropoda	D_7__Crustacea	D_8__Maxillopoda	D_9__Copepoda	D_10__Harpacticoida					0.826566
77c8b6f3ab9762241f7e56296bb6d403	OTU_625	D_0__Eukaryota	D_1__Opisthokonta	D_2__Holozoa	D_3__Metazoa (Animalia)												0.984247
e66a53e151f23c3b2755d58a18a61179	OTU_626	D_0__Eukaryota	D_1__SAR	D_2__Alveolata	D_3__Ciliophora	D_4__Intramacronucleata	D_5__Conthreep	D_6__Oligohymenophorea	D_7__Peritrichia	D_8__Zoothamnium	D_9__Zoothamnium alternans	D_10__	D_11__	D_12__	D_13__	D_14__	0.999966
7b3753d8605c1cb4605c3bc21ccacfe4	OTU_627	D_0__Eukaryota	D_1__Cryptophyceae	D_2__Cryptomonadales	D_3__uncultured marine eukaryote	D_4__	D_5__	D_6__	D_7__	D_8__	D_9__	D_10__	D_11__	D_12__	D_13__	D_14__	0.997442
bb7da28aae371c256885d5770f86244a	OTU_628	D_0__Eukaryota	D_1__Opisthokonta	D_2__Holozoa	D_3__Metazoa (Animalia)	D_4__Eumetazoa	D_5__Bilateria	D_6__Bryozoa	D_7__Gymnolaemata	D_8__Cheilostomatida							0.929853
4d340e805bdaa014df10130f6a5a8e24	OTU_629	D_0__Eukaryota															1
18a8c962daf8b34931f67360e323ae7b	OTU_630	D_0__Eukaryota	D_1__Opisthokonta	D_2__Nucletmycea	D_3__Fungi	D_4__Dikarya	D_5__Basidiomycota	D_6__Agaricomycotina	D_7__Agaricomycetes	D_8__Agaricales							0.807607
447680e003246db87f2281e784dcb42f	OTU_631	D_0__Eukaryota	D_1__Opisthokonta	D_2__Holozoa	D_3__Metazoa (Animalia)	D_4__Eumetazoa	D_5__Bilateria	D_6__Arthropoda	D_7__Crustacea	D_8__Maxillopoda	D_9__Copepoda						0.974936
d55c029d8d410f66f019b4cdcdeb1bea	OTU_632	D_0__Eukaryota	D_1__Opisthokonta	D_2__Holozoa	D_3__Metazoa (Animalia)	D_4__Eumetazoa	D_5__Bilateria	D_6__Nemertea	D_7__Anopla	D_8__Heteronemertea	D_9__Gorgonorhynchus albocinctus	D_10__	D_11__	D_12__	D_13__	D_14__	0.950868
e09262fa0bfb59a219261649583c98b5	OTU_633	D_0__Eukaryota	D_1__Opisthokonta	D_2__Holozoa													0.910594
8b012cdb204ae3661dc00941d76c30e8	OTU_634	D_0__Eukaryota	D_1__Centrohelida	D_2__uncultured eukaryote	D_3__	D_4__	D_5__	D_6__	D_7__	D_8__	D_9__	D_10__	D_11__	D_12__	D_13__	D_14__	0.966502
04bf9bd36b6ab918086f9b977e43de21	OTU_635	D_0__Eukaryota	D_1__Opisthokonta	D_2__Holozoa	D_3__Metazoa (Animalia)	D_4__Eumetazoa	D_5__Bilateria	D_6__Annelida	D_7__Polychaeta	D_8__Palpata	D_9__Palpata Incertae Sedis	D_10__Polygordius sp. SHP-2002	D_11__	D_12__	D_13__	D_14__	0.852032
5d2b0c8b046fc8cc304794bbf27e1895	OTU_636	D_0__Eukaryota															1
63831cbe9f51b1bd0c55e834d54d9eff	OTU_637	D_0__Eukaryota	D_1__SAR	D_2__Alveolata													0.988303
3171c332bad540a9e85c65cbe7e775fc	OTU_638	D_0__Eukaryota	D_1__SAR	D_2__Stramenopiles	D_3__Labyrinthulomycetes	D_4__Thraustochytriaceae	D_5__Aplanochytrium	D_6__uncultured marine eukaryote	D_7__	D_8__	D_9__	D_10__	D_11__	D_12__	D_13__	D_14__	0.7324
3b57d9de144e1b24f936f403205c70a3	OTU_639	D_0__Eukaryota	D_1__Haptophyta	D_2__Prymnesiophyceae													0.999999
1fb13f7990da2c3ed9dc097db00d0473	OTU_640	D_0__Eukaryota															1
c23853bd39ba7d2554a895516d4f0618	OTU_641	D_0__Eukaryota	D_1__Opisthokonta	D_2__Holozoa	D_3__Metazoa (Animalia)	D_4__Eumetazoa	D_5__Bilateria	D_6__Arthropoda	D_7__Crustacea	D_8__Maxillopoda	D_9__Copepoda	D_10__Harpacticoida					0.963329
6eaf5590b6e5ac78ed9d09b748cd6321	OTU_642	D_0__Eukaryota	D_1__Opisthokonta	D_2__Holozoa	D_3__Metazoa (Animalia)	D_4__Eumetazoa											0.700077
1a787fcbcd165d69f30413d92b8231c1	OTU_643	D_0__Eukaryota	D_1__Opisthokonta	D_2__Holozoa	D_3__Metazoa (Animalia)	D_4__Eumetazoa											0.793229
58a1eeaa236a5470041a619720e0fbad	OTU_644	D_0__Eukaryota	D_1__Opisthokonta	D_2__Holozoa	D_3__Metazoa (Animalia)	D_4__Eumetazoa	D_5__Bilateria										0.8616
345875b756df4612f27ef2d3823c684e	OTU_645	D_0__Eukaryota	D_1__Opisthokonta	D_2__Holozoa	D_3__Metazoa (Animalia)	D_4__Porifera	D_5__Demospongiae	D_6__Haplosclerida	D_7__Haliclona amboinensis	D_8__	D_9__	D_10__	D_11__	D_12__	D_13__	D_14__	0.999959
93bb32aa13f8682af95f33a09213086d	OTU_646	D_0__Eukaryota	D_1__SAR	D_2__Rhizaria	D_3__Retaria	D_4__Foraminifera	D_5__Globothalamea	D_6__Rotaliida									0.999096
d20e69e6aa1c492b63d56e46738a0e94	OTU_647	D_0__Eukaryota															1
752e03696c31f9877aee4712e5aa6dd6	OTU_648	D_0__Eukaryota	D_1__SAR	D_2__Alveolata													0.997485
7027d09f524146cb2616f3d7aa7df642	OTU_649	D_0__Eukaryota															1
35bbec2d77dfa45f82df01d39a148a90	OTU_650	D_0__Eukaryota	D_1__Opisthokonta	D_2__Holozoa	D_3__Metazoa (Animalia)	D_4__Eumetazoa	D_5__Bilateria	D_6__Xenacoelomorpha	D_7__Acoelomorpha	D_8__Acoela							0.881676
d82cb6ec41de3ac54a1e9ae8e91c553d	OTU_651	D_0__Eukaryota	D_1__Opisthokonta	D_2__Holozoa	D_3__Metazoa (Animalia)	D_4__Eumetazoa	D_5__Bilateria	D_6__Arthropoda	D_7__Crustacea	D_8__Ostracoda	D_9__Podocopa	D_10__Podocopida					0.997934
c1f0d6179a8106064ebcf4cffa5e61c4	OTU_652	D_0__Eukaryota	D_1__SAR	D_2__Alveolata	D_3__Ciliophora	D_4__Intramacronucleata	D_5__Conthreep	D_6__Nassophorea	D_7__uncultured	D_8__uncultured eukaryote	D_9__	D_10__	D_11__	D_12__	D_13__	D_14__	0.999987
a360e0bfd84fc4774eb7bd27f39b5e7e	OTU_653	D_0__Eukaryota	D_1__Opisthokonta	D_2__Holozoa	D_3__Metazoa (Animalia)	D_4__Eumetazoa	D_5__Bilateria	D_6__Annelida	D_7__Polychaeta	D_8__Palpata	D_9__Phyllodocida	D_10__Erinaceusyllis bidentata	D_11__	D_12__	D_13__	D_14__	0.87993
06cd0aa90fe95c1c19160e06205ad03b	OTU_654	D_0__Eukaryota	D_1__Opisthokonta	D_2__Nucletmycea	D_3__Fungi	D_4__Dikarya	D_5__Basidiomycota	D_6__Agaricomycotina	D_7__Agaricomycetes	D_8__Agaricales	D_9__Schizophyllaceae	D_10__Schizophyllum	D_11__Schizophyllum commune	D_12__	D_13__	D_14__	0.94989
ed0190d27de852723f5e75d4f2f12134	OTU_655	D_0__Eukaryota	D_1__Opisthokonta	D_2__Holozoa													0.961634
717b855b8707e2aa5965c0ded3704443	OTU_656	D_0__Eukaryota															1
2f5d32c68ea89c68049da2e690364552	OTU_657	D_0__Eukaryota	D_1__Opisthokonta	D_2__Holozoa	D_3__Metazoa (Animalia)	D_4__Porifera	D_5__Demospongiae	D_6__Tetractinellida	D_7__Candidatus Entotheonella sp. TSY1	D_8__	D_9__	D_10__	D_11__	D_12__	D_13__	D_14__	0.811744
be98899e1f598bb8eacd36bbb287d40c	OTU_658	D_0__Eukaryota															1
c38b7ef786f0ddf821fce5e1da599726	OTU_659	D_0__Eukaryota	D_1__Opisthokonta														0.927039
9db5fbd5f2a78bfad5063292d0085582	OTU_660	D_0__Eukaryota	D_1__SAR	D_2__Alveolata	D_3__Protalveolata	D_4__Syndiniales	D_5__Syndiniales Group II	D_6__uncultured syndiniales	D_7__	D_8__	D_9__	D_10__	D_11__	D_12__	D_13__	D_14__	0.998297
3d64b5024eb7ba7708f8150c8fffa821	OTU_661	D_0__Eukaryota	D_1__SAR	D_2__Alveolata													0.983487
069d07128ba05f19277747dab740bc3e	OTU_662	D_0__Eukaryota	D_1__Opisthokonta	D_2__Holozoa	D_3__Metazoa (Animalia)	D_4__Eumetazoa	D_5__Bilateria	D_6__Chordata	D_7__Tunicata	D_8__Ascidiacea	D_9__Stolidobranchia	D_10__Pyura gangelion	D_11__	D_12__	D_13__	D_14__	0.995693
5786a23ba12c706dbc2a90f824170054	OTU_663	D_0__Eukaryota	D_1__SAR	D_2__Alveolata	D_3__Dinoflagellata	D_4__Dinophyceae	D_5__Dinophysiales	D_6__Sinophysis	D_7__Sinophysis microcephalus	D_8__	D_9__	D_10__	D_11__	D_12__	D_13__	D_14__	0.855546
98784bbf954f2649d96eb1a75309c6ba	OTU_664	D_0__Eukaryota	D_1__Archaeplastida	D_2__Chloroplastida	D_3__Chlorophyta	D_4__Clade IX	D_5__uncultured eukaryote	D_6__	D_7__	D_8__	D_9__	D_10__	D_11__	D_12__	D_13__	D_14__	1
dcd6e299d3a189e22a3692b5f503eaa7	OTU_665	D_0__Eukaryota															1
a6f4b6a96009eee0230b26cc511ab915	OTU_666	D_0__Eukaryota	D_1__Opisthokonta	D_2__Holozoa	D_3__Metazoa (Animalia)	D_4__Porifera	D_5__Demospongiae	D_6__Dictyoceratida	D_7__Hippospongia communis (horse sponge)	D_8__	D_9__	D_10__	D_11__	D_12__	D_13__	D_14__	0.999958
874312288d2d7e4fbf53bb072b946785	OTU_667	D_0__Eukaryota	D_1__SAR	D_2__Stramenopiles	D_3__Ochrophyta	D_4__Diatomea	D_5__Bacillariophytina	D_6__Mediophyceae	D_7__Attheya	D_8__Attheya longicornis	D_9__	D_10__	D_11__	D_12__	D_13__	D_14__	0.712942
f30e35481d0e91d50a77e503e25bcd35	OTU_668	D_0__Eukaryota	D_1__Opisthokonta	D_2__Holozoa	D_3__Metazoa (Animalia)	D_4__Eumetazoa	D_5__Bilateria	D_6__Arthropoda	D_7__Crustacea	D_8__Maxillopoda	D_9__Copepoda	D_10__Harpacticoida					0.77801
ff5c3434edf768c0540b34155b8b1931	OTU_669	D_0__Eukaryota	D_1__Opisthokonta	D_2__Holozoa	D_3__Metazoa (Animalia)	D_4__Eumetazoa	D_5__Bilateria	D_6__Annelida	D_7__Polychaeta	D_8__Scolecida	D_9__Terebellida	D_10__Lysilla sp. THS-2012	D_11__	D_12__	D_13__	D_14__	0.80929
850e468dda733af1b09e4ea723311004	OTU_670	D_0__Eukaryota	D_1__Opisthokonta	D_2__Holozoa	D_3__Metazoa (Animalia)	D_4__Eumetazoa	D_5__Bilateria	D_6__Mollusca	D_7__Bivalvia	D_8__Pteriomorphia	D_9__Mytiloida						0.999886
7bce35856a393c7cf5981771c880f55e	OTU_671	D_0__Eukaryota	D_1__SAR	D_2__Alveolata	D_3__Ciliophora	D_4__Intramacronucleata	D_5__Spirotrichea	D_6__Oligotrichia	D_7__Spirotontonia	D_8__uncultured eukaryote	D_9__	D_10__	D_11__	D_12__	D_13__	D_14__	0.996879
08b7f1a7f752a892f8c89c91f0d5fc26	OTU_672	D_0__Eukaryota	D_1__SAR	D_2__Alveolata	D_3__Apicomplexa	D_4__Novel Apicomplexa Class 2	D_5__Gregarinasina gen. sp. 1 KCW-2013	D_6__	D_7__	D_8__	D_9__	D_10__	D_11__	D_12__	D_13__	D_14__	0.861233
464f5b6f02a6fcf726fa845861b5b922	OTU_673	D_0__Eukaryota	D_1__SAR	D_2__Alveolata	D_3__Dinoflagellata	D_4__Dinophyceae	D_5__uncultured	D_6__uncultured eukaryote	D_7__	D_8__	D_9__	D_10__	D_11__	D_12__	D_13__	D_14__	0.991651
878dbd574ceac69ebc55d7dac50fa8ed	OTU_674	D_0__Eukaryota	D_1__SAR	D_2__Stramenopiles	D_3__Peronosporomycetes												0.9581
13a038346d4637d8a49daee352c78998	OTU_675	D_0__Eukaryota	D_1__SAR	D_2__Alveolata													0.983038
df7703cb380c3b26cb37833fdab4f7fb	OTU_676	D_0__Eukaryota	D_1__Opisthokonta	D_2__Holozoa	D_3__Metazoa (Animalia)	D_4__Eumetazoa	D_5__Cnidaria	D_6__Anthozoa	D_7__Octocorallia	D_8__Alcyonacea	D_9__Dendronephthya putteri	D_10__	D_11__	D_12__	D_13__	D_14__	0.725031
b67c9c562a2fb184c15f836dc7f926f1	OTU_677	D_0__Eukaryota															1
094dc8411b8b0c699e71d1c897160808	OTU_678	D_0__Eukaryota	D_1__Opisthokonta														0.963598
453e16eb6af4a26e5af32db32f265b78	OTU_679	D_0__Eukaryota	D_1__Opisthokonta	D_2__Holozoa	D_3__Metazoa (Animalia)	D_4__Eumetazoa	D_5__Bilateria	D_6__Arthropoda	D_7__Hexapoda	D_8__Insecta	D_9__Pterygota	D_10__Neoptera	D_11__Hymenoptera				0.935901
5546a6d151c0e22c4bf20324936285a3	OTU_680	D_0__Eukaryota	D_1__SAR	D_2__Alveolata	D_3__Protalveolata	D_4__Syndiniales	D_5__Syndiniales Group I	D_6__uncultured marine eukaryote	D_7__	D_8__	D_9__	D_10__	D_11__	D_12__	D_13__	D_14__	0.999474
a11aaae3f0541c814de37731fbd1e80a	OTU_681	D_0__Eukaryota	D_1__SAR	D_2__Stramenopiles													0.964872
ae1df6275c489f1633c9ba39d998b4b5	OTU_682	D_0__Eukaryota	D_1__Opisthokonta	D_2__Holozoa	D_3__Metazoa (Animalia)	D_4__Eumetazoa	D_5__Bilateria	D_6__Arthropoda	D_7__Crustacea	D_8__Maxillopoda	D_9__Copepoda						0.93671
7209f7d12b376f135bd5cc4d4ebd2136	OTU_683	D_0__Eukaryota	D_1__SAR	D_2__Stramenopiles	D_3__Ochrophyta	D_4__Pelagophyceae	D_5__Pelagomonadales	D_6__Pelagomonas	D_7__Pelagomonas calceolata	D_8__	D_9__	D_10__	D_11__	D_12__	D_13__	D_14__	0.99952
042a673c4d3fb7d11f8af0749cd95818	OTU_684	D_0__Eukaryota	D_1__Opisthokonta	D_2__Holozoa	D_3__Metazoa (Animalia)	D_4__Eumetazoa	D_5__Bilateria	D_6__Annelida	D_7__Polychaeta	D_8__Palpata	D_9__Phyllodocida	D_10__Kefersteinia cirrata	D_11__	D_12__	D_13__	D_14__	0.957777
e1df423188398df4d146d81a5c1f789a	OTU_685	D_0__Eukaryota															1
962ac0b08d31b1dd8bef31c1f78395f5	OTU_686	D_0__Eukaryota															1
69c302f2a2fbb2013ff1e04b372a1280	OTU_687	D_0__Eukaryota	D_1__SAR	D_2__Alveolata	D_3__Protalveolata	D_4__Syndiniales	D_5__Syndiniales Group I	D_6__Takayama cf. pulchellum	D_7__	D_8__	D_9__	D_10__	D_11__	D_12__	D_13__	D_14__	0.755258
ab1c06121977e893b9f84a364356a1cf	OTU_688	D_0__Eukaryota	D_1__Opisthokonta	D_2__Holozoa	D_3__Metazoa (Animalia)	D_4__Eumetazoa	D_5__Bilateria	D_6__Arthropoda	D_7__Crustacea	D_8__Maxillopoda	D_9__Copepoda	D_10__Cyclopoida	D_11__Xarifia sp. New Caledonia-RJH-2004	D_12__	D_13__	D_14__	0.999264
b775eb24c1510909e4c7a49d129ac736	OTU_689	D_0__Eukaryota															1
c2153c88bdbb69fc11b105f482f24525	OTU_690	D_0__Eukaryota															1
021246f727f2e91d3af07fd317397f1a	OTU_691	D_0__Eukaryota	D_1__SAR	D_2__Stramenopiles	D_3__Peronosporomycetes												0.988692
c4c08ffd78f76a5a4fe85763ff88439e	OTU_692	D_0__Eukaryota	D_1__SAR	D_2__Alveolata	D_3__Apicomplexa	D_4__Novel Apicomplexa Class 2	D_5__Gregarinasina gen. sp. 1 KCW-2013	D_6__	D_7__	D_8__	D_9__	D_10__	D_11__	D_12__	D_13__	D_14__	0.826762
a84a7847d38aff4c6c9ea7c3517b360e	OTU_693	D_0__Eukaryota	D_1__Opisthokonta	D_2__Holozoa	D_3__Metazoa (Animalia)	D_4__Eumetazoa	D_5__Cnidaria	D_6__Hydrozoa	D_7__Trachylinae	D_8__Trachymedusae	D_9__uncultured metazoan	D_10__	D_11__	D_12__	D_13__	D_14__	0.980505
0489b9b73dbbc2c4813c007edefde822	OTU_694	D_0__Eukaryota	D_1__Opisthokonta	D_2__Holozoa	D_3__Metazoa (Animalia)	D_4__Eumetazoa	D_5__Bilateria										0.993592
45b70deba14b93424d2dd18ba810545f	OTU_695	D_0__Eukaryota	D_1__SAR	D_2__Stramenopiles	D_3__Ochrophyta	D_4__Diatomea	D_5__Bacillariophytina										0.72158
42569f10aaf4e61bc2c9e2dec599e847	OTU_696	D_0__Eukaryota	D_1__SAR	D_2__Alveolata													0.974131
d4128bea4959de725ec8a75ae1ff61e8	OTU_697	D_0__Eukaryota	D_1__Opisthokonta	D_2__Holozoa	D_3__Metazoa (Animalia)	D_4__Eumetazoa	D_5__Bilateria	D_6__Arthropoda	D_7__Crustacea	D_8__Maxillopoda	D_9__Copepoda	D_10__Calanoida	D_11__Candacia discaudata	D_12__	D_13__	D_14__	0.799725
08e35838ae97a7fa904e35f5576116fa	OTU_698	D_0__Eukaryota	D_1__SAR	D_2__Alveolata													0.987084
a8f0974acd811ff5069ea686d7f57dc0	OTU_699	D_0__Eukaryota	D_1__SAR	D_2__Alveolata													0.999238
f24e9cb874849251646246909752124c	OTU_700	D_0__Eukaryota	D_1__Opisthokonta														0.769108
e300a042c90714ceff84d7c5265e31f3	OTU_701	D_0__Eukaryota	D_1__Opisthokonta	D_2__Holozoa	D_3__Metazoa (Animalia)	D_4__Porifera	D_5__Demospongiae	D_6__Halichondria sp. HAS	D_7__	D_8__	D_9__	D_10__	D_11__	D_12__	D_13__	D_14__	0.908435
ba87ed2acfe836d724dc73654a16a33d	OTU_702	D_0__Eukaryota															1
2c97b2081f579cdc8b64ec246618b4d2	OTU_703	D_0__Eukaryota															1
a82bfbfa67981111199e30ba113afc3d	OTU_704	D_0__Eukaryota	D_1__Archaeplastida	D_2__Rhodophyceae	D_3__Florideophycidae	D_4__Rhodymeniophycidae											0.999999
1315758fa2cf496a28751fa116fae8ac	OTU_705	D_0__Eukaryota	D_1__SAR	D_2__Stramenopiles													0.993253
f3959299aba614d709694a1993211c91	OTU_706	D_0__Eukaryota															1
24822864978c9859615656a76f7bc481	OTU_707	D_0__Eukaryota	D_1__SAR	D_2__Alveolata													0.98953
93c011d74020b41e6c86450135a3bfdb	OTU_708	D_0__Eukaryota	D_1__Opisthokonta	D_2__Holozoa	D_3__Metazoa (Animalia)	D_4__Eumetazoa	D_5__Bilateria	D_6__Gastrotricha	D_7__Chaetonotida	D_8__uncultured eukaryote	D_9__	D_10__	D_11__	D_12__	D_13__	D_14__	0.832749
931f6a267e8e8f62250df4054904300e	OTU_709	D_0__Eukaryota	D_1__Opisthokonta	D_2__Holozoa	D_3__Metazoa (Animalia)	D_4__Eumetazoa	D_5__Bilateria	D_6__Arthropoda	D_7__Crustacea	D_8__Maxillopoda	D_9__Copepoda	D_10__Calanoida					0.725036
ef105ee21612c7757e35d33b85d061de	OTU_710	D_0__Eukaryota															1
a627aa93561d1164d107df1c3a7d6237	OTU_711	D_0__Eukaryota	D_1__SAR	D_2__Stramenopiles	D_3__Ochrophyta	D_4__Diatomea	D_5__Bacillariophytina	D_6__Bacillariophyceae									0.985381
10c7c3774c457183a3c193c82e612a62	OTU_712	D_0__Eukaryota	D_1__SAR	D_2__Rhizaria	D_3__Retaria	D_4__Foraminifera	D_5__Globothalamea	D_6__Rotaliida									0.999949
90c1fe3062cc00de9b78c5306e9d67be	OTU_713	D_0__Eukaryota	D_1__Opisthokonta														0.742171
85ce1a7493b7fbc9b4ba4cb4f09fdc69	OTU_714	D_0__Eukaryota	D_1__Cryptophyceae														0.879877
c5443a929f221e41cb8390cefdf1602d	OTU_715	D_0__Eukaryota	D_1__SAR	D_2__Stramenopiles	D_3__MAST-1	D_4__MAST-1C	D_5__uncultured eukaryote	D_6__	D_7__	D_8__	D_9__	D_10__	D_11__	D_12__	D_13__	D_14__	1
78fc9fc2dd026e090aa27fd1185b5d3b	OTU_716	D_0__Eukaryota	D_1__SAR	D_2__Stramenopiles	D_3__Ochrophyta	D_4__Chrysophyceae											0.938658
e7650b1587b0004715e8adb18a6f812b	OTU_717	D_0__Eukaryota	D_1__Opisthokonta														0.969088
d132d54c10ca45104bbbb3567e5b4f87	OTU_718	D_0__Eukaryota															1
84d89c93492a30a757fb23707a2d7212	OTU_719	D_0__Eukaryota	D_1__SAR	D_2__Stramenopiles	D_3__Labyrinthulomycetes												0.863866
ca3bfeb20526cd9659491470bc91b1f6	OTU_720	D_0__Eukaryota	D_1__Opisthokonta	D_2__Holozoa	D_3__Metazoa (Animalia)												0.817436
465b1b0c5643ac1c3daa80f917ec5d43	OTU_721	D_0__Eukaryota	D_1__SAR	D_2__Alveolata	D_3__Dinoflagellata												0.809468
18ac6b4fea58a6f67de1f12f9d4fbd56	OTU_722	D_0__Eukaryota	D_1__SAR	D_2__Stramenopiles	D_3__Ochrophyta	D_4__Diatomea	D_5__Bacillariophytina	D_6__Bacillariophyceae									0.929067
689b53a9f47ef82d2992e282f60c1320	OTU_723	D_0__Eukaryota	D_1__SAR	D_2__Alveolata	D_3__Protalveolata	D_4__Syndiniales	D_5__Syndiniales Group I	D_6__uncultured eukaryote	D_7__	D_8__	D_9__	D_10__	D_11__	D_12__	D_13__	D_14__	0.737001
73e3b135149a59d8f3552d967858c3db	OTU_724	D_0__Eukaryota	D_1__SAR	D_2__Stramenopiles	D_3__MAST-3	D_4__MAST-3I	D_5__uncultured eukaryote	D_6__	D_7__	D_8__	D_9__	D_10__	D_11__	D_12__	D_13__	D_14__	0.99596
e29dbbc02396dda7f1b3491115bd2878	OTU_725	D_0__Eukaryota	D_1__SAR	D_2__Stramenopiles	D_3__Ochrophyta	D_4__Diatomea	D_5__Bacillariophytina	D_6__Mediophyceae	D_7__Chaetoceros	D_8__seawater metagenome	D_9__	D_10__	D_11__	D_12__	D_13__	D_14__	0.999763
e5b14aa2c6a1fb8a9277fbba4713ba9e	OTU_726	D_0__Eukaryota	D_1__Opisthokonta	D_2__Holozoa	D_3__Metazoa (Animalia)	D_4__Eumetazoa	D_5__Bilateria	D_6__Arthropoda	D_7__Crustacea	D_8__Maxillopoda	D_9__Copepoda	D_10__Harpacticoida	D_11__Diarthrodes sp. 1 New Caledonia-RJH-2007	D_12__	D_13__	D_14__	0.987936
f207728bb8ebf43ae69f141bc9dccbf0	OTU_727	D_0__Eukaryota	D_1__Opisthokonta	D_2__Holozoa	D_3__Metazoa (Animalia)	D_4__Eumetazoa	D_5__Bilateria	D_6__Annelida	D_7__Polychaeta	D_8__Scolecida	D_9__Capitellida	D_10__Dasybranchus caducus	D_11__	D_12__	D_13__	D_14__	0.999965
2c61f86f199de7ce18a563f2bd890c8f	OTU_728	D_0__Eukaryota	D_1__SAR	D_2__Stramenopiles	D_3__Ochrophyta	D_4__Chrysophyceae											0.907863
b10fe5234a69a3c29e6cc6bc06682a12	OTU_729	D_0__Eukaryota	D_1__SAR	D_2__Alveolata	D_3__Dinoflagellata	D_4__Dinophyceae	D_5__Gymnodiniphycidae	D_6__uncultured	D_7__uncultured marine eukaryote	D_8__	D_9__	D_10__	D_11__	D_12__	D_13__	D_14__	0.821645
15092f8ca06ad77c070694cddd53cb3f	OTU_730	D_0__Eukaryota	D_1__Opisthokonta	D_2__Holozoa	D_3__Metazoa (Animalia)	D_4__Eumetazoa	D_5__Bilateria	D_6__Arthropoda	D_7__Crustacea	D_8__Maxillopoda	D_9__Copepoda	D_10__Harpacticoida					0.865035
0c5aaaaa4ccda238ce3f7cc3b4705852	OTU_731	D_0__Eukaryota	D_1__Opisthokonta	D_2__Holozoa	D_3__Metazoa (Animalia)	D_4__Eumetazoa	D_5__Bilateria	D_6__Arthropoda	D_7__Crustacea	D_8__Maxillopoda	D_9__Copepoda	D_10__Cyclopoida	D_11__uncultured eukaryote	D_12__	D_13__	D_14__	0.852041
8df88a6036aa2d2bbaffd117b69e3e91	OTU_732	D_0__Eukaryota	D_1__SAR	D_2__Stramenopiles	D_3__Ochrophyta	D_4__Chrysophyceae											0.98382
50e6527b7299217ba03b51b7e697563c	OTU_733	D_0__Eukaryota	D_1__Opisthokonta	D_2__Holozoa	D_3__Metazoa (Animalia)	D_4__Eumetazoa	D_5__Bilateria	D_6__Gastrotricha	D_7__Chaetonotida	D_8__Halichaetonotus schromi	D_9__	D_10__	D_11__	D_12__	D_13__	D_14__	0.715247
3551dfc097dc66eba95f86651bfcf05c	OTU_734	D_0__Eukaryota	D_1__SAR	D_2__Alveolata	D_3__Dinoflagellata	D_4__Dinophyceae											0.918228
5e8291f997b21b6b2f8a0588a1722294	OTU_735	D_0__Eukaryota	D_1__SAR	D_2__Alveolata	D_3__Ciliophora	D_4__Intramacronucleata	D_5__Spirotrichea	D_6__Choreotrichia									0.972021
b953f5f16606a0784582be7b7cc23739	OTU_736	D_0__Eukaryota	D_1__SAR	D_2__Alveolata	D_3__Dinoflagellata	D_4__Dinophyceae	D_5__uncultured	D_6__uncultured eukaryote	D_7__	D_8__	D_9__	D_10__	D_11__	D_12__	D_13__	D_14__	0.982101
e29c01ad2658fb1b298d93d4985911e9	OTU_737	D_0__Eukaryota	D_1__Haptophyta	D_2__Prymnesiophyceae	D_3__Prymnesiales												0.995212
23d01b7c9db0321fab279c8910715d03	OTU_738	D_0__Eukaryota															1
4896ca355e3833aa7c3b0cc4d657bc98	OTU_739	D_0__Eukaryota															1
c6c3c0eb0f7fb326dc4437aecf2476a2	OTU_740	D_0__Eukaryota	D_1__Opisthokonta	D_2__Holozoa													0.700155
003af8305fab3e330d1558a55a28f827	OTU_741	D_0__Eukaryota	D_1__SAR	D_2__Alveolata	D_3__Dinoflagellata	D_4__Dinophyceae											0.869531
e8b47f76bf7c7edbed7f21a5af45e1d1	OTU_742	D_0__Eukaryota	D_1__Opisthokonta	D_2__Holozoa	D_3__Metazoa (Animalia)	D_4__Eumetazoa	D_5__Bilateria	D_6__Xenacoelomorpha	D_7__Acoelomorpha	D_8__Acoela							0.821203
5ea5c8bc6c0c7662aad6d6bb83d56093	OTU_743	D_0__Eukaryota															1
f892cc72edf02588ad07e639967f40e8	OTU_744	D_0__Eukaryota															1
d23e5a9530cab37b5d743e657abfa990	OTU_745	D_0__Eukaryota	D_1__SAR	D_2__Alveolata	D_3__Protalveolata	D_4__Syndiniales	D_5__Duboscquella										0.748732
ac01edf9c25cdeb30ce4f74cb03ec9a0	OTU_746	D_0__Eukaryota	D_1__Opisthokonta	D_2__Holozoa	D_3__Metazoa (Animalia)	D_4__Porifera	D_5__Demospongiae	D_6__Suberitida	D_7__Terpios aploos	D_8__	D_9__	D_10__	D_11__	D_12__	D_13__	D_14__	0.996102
88165f29f4b5efa7571518facc078ff6	OTU_747	D_0__Eukaryota	D_1__SAR	D_2__Alveolata	D_3__Dinoflagellata	D_4__Dinophyceae	D_5__Peridiniphycidae	D_6__Peridiniales	D_7__Protoperidinium	D_8__uncultured marine eukaryote	D_9__	D_10__	D_11__	D_12__	D_13__	D_14__	0.999921
880201b70f83a58e256cfdee8d29ecb3	OTU_748	D_0__Eukaryota	D_1__Opisthokonta	D_2__Holozoa	D_3__Metazoa (Animalia)	D_4__Eumetazoa	D_5__Bilateria	D_6__Chordata	D_7__Vertebrata	D_8__Gnathostomata	D_9__Euteleostomi	D_10__Actinopterygii	D_11__Neopterygii				0.86609
ee0394ea5495adea64425c4e5882980a	OTU_749	D_0__Eukaryota															1
2f938c59f97ae941ffb211bf2b927fd9	OTU_750	D_0__Eukaryota															1
2dfdcc1e4749cda73d33da17bfa18938	OTU_751	D_0__Eukaryota	D_1__Opisthokonta	D_2__Holozoa	D_3__Metazoa (Animalia)	D_4__Eumetazoa	D_5__Bilateria	D_6__Annelida	D_7__Polychaeta	D_8__Palpata	D_9__Sabellida	D_10__Spirorbis spirorbis	D_11__	D_12__	D_13__	D_14__	1
0eb97917497b12a77c48048f6ec8bf99	OTU_752	D_0__Eukaryota															1
500a84e3e094b39afd0bc6f62dd4ebe8	OTU_753	D_0__Eukaryota															1
40de175dadac414ae37609ea4c0718e2	OTU_754	D_0__Eukaryota	D_1__SAR	D_2__Stramenopiles	D_3__Peronosporomycetes	D_4__Halodaphnea	D_5__Halodaphnea panulirata	D_6__	D_7__	D_8__	D_9__	D_10__	D_11__	D_12__	D_13__	D_14__	0.999892
c9fcda272085e366f499248c030882de	OTU_755	D_0__Eukaryota	D_1__SAR	D_2__Stramenopiles	D_3__Ochrophyta	D_4__Diatomea	D_5__Coscinodiscophytina	D_6__Rhizosolenids	D_7__Leptocylindrus	D_8__Leptocylindrus danicus	D_9__	D_10__	D_11__	D_12__	D_13__	D_14__	0.999983
c1a9a50a19a5120716bf7b419fbef15c	OTU_756	D_0__Eukaryota	D_1__Opisthokonta	D_2__Nucletmycea	D_3__Fungi	D_4__Dikarya	D_5__Basidiomycota	D_6__Agaricomycotina	D_7__Agaricomycetes	D_8__Cantharellales	D_9__Clavulinaceae	D_10__Clavulina	D_11__Clavulina cristata	D_12__	D_13__	D_14__	0.97599
e91f69897e9eb5a3b58a1761d7964007	OTU_757	D_0__Eukaryota	D_1__Opisthokonta	D_2__Holozoa	D_3__Metazoa (Animalia)	D_4__Eumetazoa	D_5__Bilateria	D_6__Annelida	D_7__Polychaeta	D_8__Scolecida	D_9__Terebellida						0.99048
e75248890460dbdc13dfc581f4cadba1	OTU_758	D_0__Eukaryota															1
9371c786951186f254e9c2456f02085a	OTU_759	D_0__Eukaryota	D_1__SAR	D_2__Stramenopiles	D_3__Ochrophyta	D_4__Diatomea	D_5__Bacillariophytina	D_6__Bacillariophyceae									0.997834
ebab886970f14b6113165e165bf5cd66	OTU_760	D_0__Eukaryota	D_1__Archaeplastida	D_2__Chloroplastida	D_3__Chlorophyta	D_4__Clade VII	D_5__Subclade A	D_6__uncultured eukaryote	D_7__	D_8__	D_9__	D_10__	D_11__	D_12__	D_13__	D_14__	0.973916
0b8755be8626c60f61a4e4e4349f4de0	OTU_761	D_0__Eukaryota	D_1__SAR	D_2__Alveolata	D_3__Dinoflagellata	D_4__Dinophyceae	D_5__Gymnodiniphycidae										0.816343
d8c30b7c0686545665973833effa306d	OTU_762	D_0__Eukaryota	D_1__Opisthokonta	D_2__Holozoa	D_3__Metazoa (Animalia)	D_4__Eumetazoa											0.738236
f98b0bf910f15b365fb01a50d12e20f3	OTU_763	D_0__Eukaryota	D_1__SAR	D_2__Alveolata	D_3__Protalveolata	D_4__Syndiniales	D_5__Syndiniales Group V	D_6__uncultured syndiniales	D_7__	D_8__	D_9__	D_10__	D_11__	D_12__	D_13__	D_14__	0.965706
16dd6ceb98ba0a456f9edd4148681d5d	OTU_764	D_0__Eukaryota															1
e0fb44ccb7dd6bcde2060254ded7753c	OTU_765	D_0__Eukaryota	D_1__SAR	D_2__Stramenopiles	D_3__MAST-6												0.884932
b65b5b9d77ac5d1d8c0b0e79688a6a43	OTU_766	D_0__Eukaryota															1
57040e370e218101285986eba58db735	OTU_767	D_0__Eukaryota	D_1__Opisthokonta	D_2__Holozoa	D_3__Metazoa (Animalia)	D_4__Eumetazoa	D_5__Bilateria	D_6__Chordata	D_7__Vertebrata	D_8__Gnathostomata	D_9__Euteleostomi	D_10__Actinopterygii	D_11__Neopterygii	D_12__Teleostei			0.969936
3694ceaf7873682900475b21c10c7a71	OTU_768	D_0__Eukaryota	D_1__Opisthokonta	D_2__Holozoa	D_3__Metazoa (Animalia)	D_4__Eumetazoa	D_5__Cnidaria	D_6__Hydrozoa	D_7__Hydroidolina								0.70782
d830059086f50d8a3ca3773bc8e5e57c	OTU_769	D_0__Eukaryota															1
875c5d64a3087ce5af37c7415e127154	OTU_770	D_0__Eukaryota	D_1__SAR	D_2__Alveolata	D_3__Protalveolata	D_4__Syndiniales	D_5__Syndiniales Group I	D_6__uncultured Duboscquella	D_7__	D_8__	D_9__	D_10__	D_11__	D_12__	D_13__	D_14__	0.999565
b557c8e1f5aacd0545819e9cbd5d83c6	OTU_771	D_0__Eukaryota															1
53a48049ebb55e25c15da6311f84da1c	OTU_772	D_0__Eukaryota	D_1__SAR	D_2__Alveolata	D_3__Dinoflagellata	D_4__Dinophyceae	D_5__Gymnodiniphycidae										0.995192
a9f35f679143382e64b5358eb933acca	OTU_773	D_0__Eukaryota															1
60a65b12b440aaf8e49aac902d70f550	OTU_774	D_0__Eukaryota	D_1__SAR	D_2__Stramenopiles	D_3__Ochrophyta	D_4__Diatomea	D_5__Bacillariophytina	D_6__Bacillariophyceae	D_7__Nitzschia	D_8__uncultured stramenopile	D_9__	D_10__	D_11__	D_12__	D_13__	D_14__	0.98634
d80ef3f744ffb64e542b2564a8f0f2e5	OTU_775	D_0__Eukaryota															1
243d2b94f8fc61894c8c82fe402fd904	OTU_776	D_0__Eukaryota	D_1__SAR	D_2__Stramenopiles	D_3__Ochrophyta	D_4__Diatomea	D_5__Bacillariophytina	D_6__Bacillariophyceae	D_7__Navicula	D_8__uncultured marine eukaryote	D_9__	D_10__	D_11__	D_12__	D_13__	D_14__	0.854388
3cfffb73639800f2d1431f29d129c515	OTU_777	D_0__Eukaryota	D_1__Opisthokonta	D_2__Nucletmycea	D_3__Fungi	D_4__Dikarya											0.774066
0c93c8e6117dac4ef98eefb2ef902b16	OTU_778	D_0__Eukaryota	D_1__Opisthokonta	D_2__Holozoa	D_3__Metazoa (Animalia)	D_4__Eumetazoa	D_5__Bilateria										0.805964
316c7752c9f436f40fc2c4c0ee867778	OTU_779	D_0__Eukaryota															1
e53e1b14e425bf08df941b3f87b491c7	OTU_780	D_0__Eukaryota	D_1__Excavata	D_2__Discoba	D_3__Discicristata	D_4__Euglenozoa											0.776702
bc20f540328210549837109051748723	OTU_781	D_0__Eukaryota															1
3d81cef9930fd4a301365a1d25ef2210	OTU_782	D_0__Eukaryota	D_1__Opisthokonta	D_2__Nucletmycea	D_3__Fungi	D_4__Dikarya	D_5__Basidiomycota	D_6__Ustilaginomycotina	D_7__Malasseziomycetes	D_8__Malasseziales	D_9__Malasseziaceae	D_10__Malassezia	D_11__Malassezia pachydermatis	D_12__	D_13__	D_14__	0.840254
2b75ed11a6b238130cc1b651eef5fa81	OTU_783	D_0__Eukaryota	D_1__SAR	D_2__Stramenopiles	D_3__Ochrophyta	D_4__Diatomea	D_5__Bacillariophytina	D_6__Bacillariophyceae									0.922253
48c733f6e3f3198bd48145c6947335a6	OTU_784	D_0__Eukaryota															1
8d4c9623c38a7bca6628a50bfed08834	OTU_785	D_0__Eukaryota	D_1__SAR	D_2__Alveolata	D_3__Ciliophora	D_4__Intramacronucleata	D_5__Spirotrichea	D_6__Hypotrichia	D_7__Apokeronopsis	D_8__Apokeronopsis sinica	D_9__	D_10__	D_11__	D_12__	D_13__	D_14__	0.997344
88f02197cd608a1df7af980633fa0145	OTU_786	D_0__Eukaryota	D_1__Opisthokonta	D_2__Holozoa	D_3__Metazoa (Animalia)	D_4__Eumetazoa	D_5__Bilateria	D_6__Gastrotricha	D_7__Chaetonotida	D_8__Chaetonotus neptuni	D_9__	D_10__	D_11__	D_12__	D_13__	D_14__	0.829236
d85da5cc56f6fe32d06e4570ce9ef49f	OTU_787	D_0__Eukaryota	D_1__Opisthokonta	D_2__Holozoa	D_3__Metazoa (Animalia)	D_4__Eumetazoa	D_5__Bilateria	D_6__Gastrotricha	D_7__Chaetonotida								0.965444
f16965c10de8570f9f351c78c385cfaa	OTU_788	D_0__Eukaryota	D_1__SAR	D_2__Alveolata	D_3__Dinoflagellata	D_4__Dinophyceae	D_5__Gymnodiniphycidae	D_6__Gymnodinium clade	D_7__Gymnodinium	D_8__uncultured eukaryote	D_9__	D_10__	D_11__	D_12__	D_13__	D_14__	0.958988
5e4b3dfdf57b030806f62bf1c12827dc	OTU_789	D_0__Eukaryota	D_1__SAR	D_2__Stramenopiles	D_3__Ochrophyta												0.950657
7f82d4d401abd46aa9c1d786a116efce	OTU_790	D_0__Eukaryota	D_1__SAR	D_2__Stramenopiles	D_3__Ochrophyta	D_4__Diatomea	D_5__Bacillariophytina										0.852147
7fa2e3fe1340f006e9fa5c4f13609a7b	OTU_791	D_0__Eukaryota															1
d7f82914f3f9c09de9d2e050291bdbcc	OTU_792	D_0__Eukaryota	D_1__SAR	D_2__Stramenopiles													0.803172
adf0dd6312623acac5cabe5be1cabcd2	OTU_793	D_0__Eukaryota	D_1__SAR	D_2__Stramenopiles													0.974147
ab0b18136356566c32f0077299c35ea2	OTU_794	D_0__Eukaryota															1
8ed59c6c8726d9bec7d2fcedcc7dd550	OTU_795	D_0__Eukaryota	D_1__SAR	D_2__Alveolata	D_3__Dinoflagellata	D_4__Dinophyceae											0.804619
b3c6e25e741cb8813b9ece46ebed7966	OTU_796	D_0__Eukaryota	D_1__SAR	D_2__Stramenopiles	D_3__MAST-9	D_4__MAST-9A	D_5__uncultured marine eukaryote	D_6__	D_7__	D_8__	D_9__	D_10__	D_11__	D_12__	D_13__	D_14__	1
685dec4051253cd1e3f528861989e482	OTU_797	D_0__Eukaryota	D_1__Opisthokonta	D_2__Holozoa	D_3__Metazoa (Animalia)	D_4__Eumetazoa	D_5__Bilateria	D_6__Annelida	D_7__Polychaeta	D_8__Scolecida							0.758873
78b203b33c54d14db0d09ec5b9c094bd	OTU_798	D_0__Eukaryota															1
05016fed723a5ca5913beb300c4761cd	OTU_799	D_0__Eukaryota	D_1__Opisthokonta	D_2__Holozoa	D_3__Metazoa (Animalia)	D_4__Eumetazoa	D_5__Bilateria	D_6__Arthropoda	D_7__Crustacea	D_8__Maxillopoda	D_9__Copepoda	D_10__Cyclopoida					0.777233
cff5cf86e2fa7947f5ea33553fc84f43	OTU_800	D_0__Eukaryota															1
761c501e9007da443324629fca1456d5	OTU_801	D_0__Eukaryota	D_1__SAR	D_2__Stramenopiles	D_3__Ochrophyta												0.988614
d76ea8f1a21ba8539c9cee747e141e7c	OTU_802	D_0__Eukaryota	D_1__Opisthokonta	D_2__Holozoa	D_3__Ichthyosporea	D_4__Dermocystida	D_5__Rhinosporideacae	D_6__uncultured eukaryote	D_7__	D_8__	D_9__	D_10__	D_11__	D_12__	D_13__	D_14__	0.999596
ba6e0684a4b2bdc89e7638533c482606	OTU_803	D_0__Eukaryota															1
15ed48223dacd7ad40cc6e06b348a915	OTU_804	D_0__Eukaryota	D_1__SAR	D_2__Alveolata													0.812181
eb368ac1ac65f13a8dcfd1dd63738989	OTU_805	D_0__Eukaryota	D_1__SAR	D_2__Stramenopiles	D_3__Ochrophyta	D_4__Diatomea	D_5__Bacillariophytina	D_6__Bacillariophyceae									0.994739
1e254e207ebde34801f0c59facee5c08	OTU_806	D_0__Eukaryota	D_1__Opisthokonta	D_2__Holozoa	D_3__Metazoa (Animalia)	D_4__Eumetazoa	D_5__Bilateria	D_6__Arthropoda	D_7__Crustacea	D_8__Malacostraca	D_9__Eumalacostraca	D_10__Eucarida					0.958704
557a1dee360f09ccd63a247e6c1886e5	OTU_807	D_0__Eukaryota	D_1__SAR	D_2__Alveolata	D_3__Dinoflagellata	D_4__Dinophyceae											0.975552
cd5d02a39bcdb032e2ae5a310c658893	OTU_808	D_0__Eukaryota															1
b75a92155ff65f5a05a31148dba22e9f	OTU_809	D_0__Eukaryota	D_1__SAR	D_2__Stramenopiles	D_3__Ochrophyta	D_4__Chrysophyceae											0.976152
fbc902524ff076d7b32421e2ccd00245	OTU_810	D_0__Eukaryota	D_1__Opisthokonta	D_2__Holozoa	D_3__Metazoa (Animalia)	D_4__Eumetazoa	D_5__Bilateria	D_6__Mollusca	D_7__Bivalvia	D_8__Pteriomorphia	D_9__Mytiloida						0.999932
9e437720ad48016315fb0f688cb8de53	OTU_811	D_0__Eukaryota	D_1__SAR	D_2__Rhizaria	D_3__Cercozoa	D_4__Thecofilosea											0.983247
51ed32e612f81675d9835478452e8790	OTU_812	D_0__Eukaryota	D_1__Archaeplastida	D_2__Rhodophyceae	D_3__Florideophycidae	D_4__Rhodymeniophycidae											0.999999
f1134664f6f410bb346e51d9f6f5b750	OTU_813	D_0__Eukaryota	D_1__SAR	D_2__Alveolata	D_3__Ciliophora	D_4__Intramacronucleata	D_5__Conthreep	D_6__Oligohymenophorea	D_7__Scuticociliatia	D_8__uncultured eukaryote	D_9__	D_10__	D_11__	D_12__	D_13__	D_14__	0.963437
a616748960e359a47004374e310a4821	OTU_814	D_0__Eukaryota	D_1__SAR	D_2__Alveolata	D_3__Dinoflagellata	D_4__Dinophyceae	D_5__Dinophysiales	D_6__uncultured eukaryote	D_7__	D_8__	D_9__	D_10__	D_11__	D_12__	D_13__	D_14__	0.980807
5ebbd4e3f4f719f71f2f9e7840070b07	OTU_815	D_0__Eukaryota	D_1__SAR	D_2__Rhizaria	D_3__Retaria	D_4__Foraminifera	D_5__Globothalamea	D_6__Rotaliida									1
79e5b4090ec2a07cb4751e79f6a08d70	OTU_816	D_0__Eukaryota	D_1__SAR	D_2__Alveolata	D_3__Protalveolata	D_4__Syndiniales	D_5__Syndiniales Group I	D_6__uncultured Duboscquella	D_7__	D_8__	D_9__	D_10__	D_11__	D_12__	D_13__	D_14__	0.999992
6eaf04e31ac72778b3bb5f74107d09c5	OTU_817	D_0__Eukaryota	D_1__SAR	D_2__Alveolata	D_3__Protalveolata	D_4__Syndiniales	D_5__Amoebophrya	D_6__uncultured marine eukaryote	D_7__	D_8__	D_9__	D_10__	D_11__	D_12__	D_13__	D_14__	0.820644
5699422a79ee45ef41e1b90faf2b723f	OTU_818	D_0__Eukaryota	D_1__Opisthokonta	D_2__Holozoa	D_3__Metazoa (Animalia)	D_4__Eumetazoa	D_5__Bilateria	D_6__Xenacoelomorpha	D_7__Acoelomorpha	D_8__Acoela							0.988463
da0b1b902abfc299d85e38f01ad56043	OTU_819	D_0__Eukaryota	D_1__SAR	D_2__Stramenopiles	D_3__MAST-6	D_4__eukaryote marine clone ME1-24	D_5__	D_6__	D_7__	D_8__	D_9__	D_10__	D_11__	D_12__	D_13__	D_14__	0.705908
5221387c18ed44b8c3726caa324bc254	OTU_820	D_0__Eukaryota	D_1__SAR	D_2__Stramenopiles	D_3__MAST-4	D_4__uncultured stramenopile	D_5__	D_6__	D_7__	D_8__	D_9__	D_10__	D_11__	D_12__	D_13__	D_14__	0.733511
2e1e5075d9c79b3696364c49faabcd00	OTU_821	D_0__Eukaryota	D_1__Opisthokonta	D_2__Holozoa	D_3__Metazoa (Animalia)	D_4__Eumetazoa	D_5__Bilateria										0.728761
4437e0d955d7b5aede75662605230772	OTU_822	D_0__Eukaryota															1
3feb2b6055e61176047e55ef242626c3	OTU_823	D_0__Eukaryota	D_1__SAR	D_2__Stramenopiles	D_3__Ochrophyta	D_4__Diatomea	D_5__Bacillariophytina										0.725712
01480e071ce73e8913e0cbb8e332753d	OTU_824	D_0__Eukaryota	D_1__Archaeplastida	D_2__Chloroplastida	D_3__Chlorophyta	D_4__Chlorodendrophyceae	D_5__Chlorodendrales	D_6__Tetraselmis									1
0ce2a504a63ad8093318f3ee6d70078b	OTU_825	D_0__Eukaryota	D_1__SAR	D_2__Alveolata	D_3__Protalveolata	D_4__Syndiniales	D_5__Syndiniales Group II	D_6__uncultured eukaryote	D_7__	D_8__	D_9__	D_10__	D_11__	D_12__	D_13__	D_14__	0.706061
11e14bb3d1772161ec2c5617695d9e37	OTU_826	D_0__Eukaryota															1
32610d1c7840a1e596ef90c4e0826506	OTU_827	D_0__Eukaryota	D_1__SAR	D_2__Stramenopiles	D_3__Ochrophyta	D_4__Chrysophyceae											0.970163
970f9159e2e7c71e7679bce25611a343	OTU_828	D_0__Eukaryota	D_1__Archaeplastida	D_2__Rhodophyceae	D_3__Florideophycidae	D_4__Corallinophycidae	D_5__Hydrolithon										0.744217
5c5d7f5f3192af94f0e6cd4f473fd943	OTU_829	D_0__Eukaryota	D_1__SAR	D_2__Stramenopiles	D_3__Ochrophyta	D_4__Diatomea	D_5__Bacillariophytina										0.713517
4fc9679ba774559363a5c1642d49650b	OTU_830	D_0__Eukaryota	D_1__SAR	D_2__Alveolata	D_3__Apicomplexa	D_4__Novel Apicomplexa Class 2	D_5__uncultured eukaryote	D_6__	D_7__	D_8__	D_9__	D_10__	D_11__	D_12__	D_13__	D_14__	0.7714
e99a532556b9bed3fedd9e750f07303c	OTU_831	D_0__Eukaryota															1
9194ddc42b4f0d92dcbb5a87324849f5	OTU_832	D_0__Eukaryota	D_1__Opisthokonta	D_2__Holozoa	D_3__Metazoa (Animalia)	D_4__Eumetazoa	D_5__Bilateria	D_6__Annelida	D_7__Polychaeta	D_8__Palpata	D_9__Phyllodocida						0.910843
d6745eb1db4d83710b0d7038f911b4a7	OTU_833	D_0__Eukaryota	D_1__Cryptophyceae	D_2__Kathablepharidae	D_3__Leucocryptos	D_4__uncultured eukaryote	D_5__	D_6__	D_7__	D_8__	D_9__	D_10__	D_11__	D_12__	D_13__	D_14__	0.885327
26a1985af6705c82f82e688dc929e12d	OTU_834	D_0__Eukaryota	D_1__Opisthokonta	D_2__Holozoa	D_3__Metazoa (Animalia)	D_4__Eumetazoa	D_5__Bilateria	D_6__Arthropoda	D_7__Crustacea	D_8__Maxillopoda	D_9__Copepoda						0.842295
f27bc20dc6b05100925208c25299877d	OTU_835	D_0__Eukaryota	D_1__Opisthokonta	D_2__Holozoa	D_3__Metazoa (Animalia)	D_4__Eumetazoa	D_5__Bilateria	D_6__Arthropoda									0.74884
4e387019795e69eba350474359a56a5e	OTU_836	D_0__Eukaryota	D_1__Excavata	D_2__Discoba	D_3__Discicristata	D_4__Euglenozoa	D_5__Kinetoplastea	D_6__Metakinetoplastina	D_7__Neobodonida	D_8__Neobodo	D_9__uncultured kinetoplastid	D_10__	D_11__	D_12__	D_13__	D_14__	0.954326
0c472178f9148f82ef2cf77b5286f86c	OTU_837	D_0__Eukaryota	D_1__Opisthokonta	D_2__Holozoa	D_3__Metazoa (Animalia)	D_4__Eumetazoa	D_5__Cnidaria	D_6__Hydrozoa	D_7__Hydroidolina								0.789679
9707327df997da3e822973c88e658733	OTU_838	D_0__Eukaryota															1
21c69d90daace173058741cc9c65424b	OTU_839	D_0__Eukaryota	D_1__Opisthokonta														0.956059
b99e5ccfe43eecf249c3344b79496bd4	OTU_840	D_0__Eukaryota															1
b1e85e3d2b948a137df086f7316d116e	OTU_841	D_0__Eukaryota	D_1__Excavata	D_2__Discoba	D_3__Discicristata	D_4__Euglenozoa	D_5__Kinetoplastea	D_6__Metakinetoplastina	D_7__Neobodonida	D_8__Neobodo	D_9__uncultured kinetoplastid	D_10__	D_11__	D_12__	D_13__	D_14__	0.71713
736156097ab93da6c62f816b4963b550	OTU_842	D_0__Eukaryota	D_1__SAR	D_2__Alveolata	D_3__Dinoflagellata	D_4__Dinophyceae	D_5__Peridiniphycidae	D_6__Peridiniales	D_7__Peridinium	D_8__uncultured eukaryote	D_9__	D_10__	D_11__	D_12__	D_13__	D_14__	0.793586
6ff1139263fd2685473555a2aa5c265f	OTU_843	D_0__Eukaryota	D_1__Opisthokonta	D_2__Nucletmycea	D_3__Fungi	D_4__Dikarya	D_5__Ascomycota	D_6__Pezizomycotina	D_7__Dothideomycetes	D_8__Pleosporales	D_9__Incertae Sedis	D_10__uncultured	D_11__uncultured marine picoeukaryote	D_12__	D_13__	D_14__	0.919753
d399b6ea0567b0721408bf3d4af80a5d	OTU_844	D_0__Eukaryota	D_1__SAR	D_2__Stramenopiles	D_3__Ochrophyta	D_4__Diatomea	D_5__Bacillariophytina	D_6__Bacillariophyceae									0.972543
8b99b60559beb02b351888ead9598519	OTU_845	D_0__Eukaryota	D_1__SAR	D_2__Stramenopiles	D_3__Ochrophyta	D_4__MOCH-2	D_5__uncultured eukaryote	D_6__	D_7__	D_8__	D_9__	D_10__	D_11__	D_12__	D_13__	D_14__	0.767654
095ebe4b265dabc34d87479243d29174	OTU_846	D_0__Eukaryota	D_1__SAR	D_2__Alveolata	D_3__Dinoflagellata	D_4__Dinophyceae	D_5__Gymnodiniphycidae	D_6__Ptychodiscus	D_7__uncultured eukaryote	D_8__	D_9__	D_10__	D_11__	D_12__	D_13__	D_14__	0.809284
d9f3566c966c06bbdf8dfbd3539ca7e4	OTU_847	D_0__Eukaryota	D_1__SAR	D_2__Alveolata	D_3__Dinoflagellata												0.703809
d283c92683dc4b23f2b5b420fffc3d2d	OTU_848	D_0__Eukaryota															1
98a5a74afc8c8f51f81c1f3cb381dc1e	OTU_849	D_0__Eukaryota															1
a3b8aabeafec30c3501d86cdb95c1a65	OTU_850	D_0__Eukaryota	D_1__SAR	D_2__Stramenopiles	D_3__MAST-3	D_4__MAST-3A	D_5__Rhizidiomyces apophysatus	D_6__	D_7__	D_8__	D_9__	D_10__	D_11__	D_12__	D_13__	D_14__	0.999875
b0eafb9192c3c7ccaf453de167c2f9a9	OTU_851	D_0__Eukaryota	D_1__Opisthokonta	D_2__Holozoa	D_3__Metazoa (Animalia)	D_4__Eumetazoa	D_5__Bilateria	D_6__Arthropoda	D_7__Crustacea	D_8__Maxillopoda	D_9__Copepoda	D_10__Harpacticoida	D_11__Diarthrodes sp. 1 New Caledonia-RJH-2007	D_12__	D_13__	D_14__	0.990102
96ba4c7ae236906870f016a7e6fe8612	OTU_852	D_0__Eukaryota	D_1__Haptophyta	D_2__Prymnesiophyceae	D_3__Prymnesiales	D_4__Chrysochromulina	D_5__uncultured eukaryote	D_6__	D_7__	D_8__	D_9__	D_10__	D_11__	D_12__	D_13__	D_14__	0.993711
ec5a36cc420c786b2ddcbe68665f2723	OTU_853	D_0__Eukaryota	D_1__SAR	D_2__Stramenopiles													0.996877
fa2e71331b3585ca81c55650a978999c	OTU_854	D_0__Eukaryota	D_1__Opisthokonta	D_2__Nucletmycea	D_3__Fungi	D_4__Dikarya	D_5__Basidiomycota	D_6__Agaricomycotina	D_7__Agaricomycetes	D_8__Corticiales	D_9__Corticiaceae	D_10__Hyphodontia	D_11__Hyphodontia arguta	D_12__	D_13__	D_14__	0.739877
07ffed3268d19f99f07cd21efe98b3a3	OTU_855	D_0__Eukaryota	D_1__Opisthokonta	D_2__Nucletmycea	D_3__Fungi												0.853752
d98483548bb5a04470e1760fd2c0be72	OTU_856	D_0__Eukaryota	D_1__SAR	D_2__Stramenopiles													0.999963
426d688bd731d8d77ef673b70ee74d1e	OTU_857	D_0__Eukaryota															1
73b2a4d6afeafe590a46a378e1635fbc	OTU_858	D_0__Eukaryota															1
4a955fcfb9dd9b42a3d11fd8425b41ef	OTU_859	D_0__Eukaryota	D_1__SAR	D_2__Alveolata	D_3__Protalveolata	D_4__Syndiniales	D_5__uncultured eukaryote	D_6__	D_7__	D_8__	D_9__	D_10__	D_11__	D_12__	D_13__	D_14__	0.96873
43e02a5595a1d08a55b8f007dc89affc	OTU_860	D_0__Eukaryota															1
a2f8a3bbee9452ebd5c7f95ce29c1734	OTU_861	D_0__Eukaryota	D_1__SAR	D_2__Alveolata													1
32aafbcc01ce350bfdda67036b32d716	OTU_862	D_0__Eukaryota	D_1__Opisthokonta	D_2__Holozoa	D_3__Metazoa (Animalia)	D_4__Eumetazoa	D_5__Bilateria	D_6__Arthropoda	D_7__Crustacea	D_8__Maxillopoda	D_9__Copepoda						0.982084
f3bbe09c395f7ec07c7983e6f3f23d8d	OTU_863	D_0__Eukaryota	D_1__SAR														0.999999
10a36a6e1a781de5ce71cee5086dc018	OTU_864	D_0__Eukaryota	D_1__Amoebozoa	D_2__Discosea	D_3__Flabellinia	D_4__Dactylopodida	D_5__Paramoeba	D_6__Paramoeba branchiphila	D_7__	D_8__	D_9__	D_10__	D_11__	D_12__	D_13__	D_14__	0.999999
c1b0166f82c3a9bafe5ffeea4f6b5668	OTU_865	D_0__Eukaryota	D_1__Archaeplastida	D_2__Rhodophyceae	D_3__Florideophycidae	D_4__Rhodymeniophycidae											0.999901
0f95f97141524b2c3f40a162a0af8b49	OTU_866	D_0__Eukaryota	D_1__Opisthokonta	D_2__Holozoa	D_3__Metazoa (Animalia)	D_4__Eumetazoa	D_5__Bilateria	D_6__Arthropoda	D_7__Crustacea	D_8__Maxillopoda	D_9__Copepoda	D_10__Harpacticoida					0.889413
83cb09c2fbe8b5ae2b237e6790bac0ed	OTU_867	D_0__Eukaryota	D_1__Opisthokonta	D_2__Nucletmycea	D_3__Fungi	D_4__Dikarya											0.775701
8b5708ed48130089b4a111399bca6fba	OTU_868	D_0__Eukaryota															1
28bfa004c5caddd77414e32bc2b9fe6b	OTU_869	D_0__Eukaryota															1
94fc78a056c96b27a259af9ef2b160b5	OTU_870	D_0__Eukaryota	D_1__Centrohelida														0.968468
c98bf5232ca52ecd42660fb9831f2fd2	OTU_871	D_0__Eukaryota	D_1__Archaeplastida	D_2__Chloroplastida	D_3__Chlorophyta	D_4__Prasinophytae	D_5__Pseudoscourfieldiales	D_6__Pycnococcus	D_7__Pycnococcus provasolii	D_8__	D_9__	D_10__	D_11__	D_12__	D_13__	D_14__	1
30c89e58a8eba35b0a5beb87ac515bfe	OTU_872	D_0__Eukaryota	D_1__SAR	D_2__Stramenopiles	D_3__MAST-1	D_4__MAST-1D	D_5__uncultured stramenopile	D_6__	D_7__	D_8__	D_9__	D_10__	D_11__	D_12__	D_13__	D_14__	0.94251
f420392d116e4ac5bec0be618dcc9435	OTU_873	D_0__Eukaryota	D_1__SAR	D_2__Alveolata													0.737646
1e9fce1400af091029190b289e1ed6aa	OTU_874	D_0__Eukaryota	D_1__SAR	D_2__Alveolata	D_3__Protalveolata	D_4__Syndiniales	D_5__Syndiniales Group II	D_6__uncultured eukaryote	D_7__	D_8__	D_9__	D_10__	D_11__	D_12__	D_13__	D_14__	0.884415
e089b54c7fb2dd91905bcae979e66238	OTU_875	D_0__Eukaryota	D_1__Opisthokonta	D_2__Holozoa	D_3__Metazoa (Animalia)	D_4__Eumetazoa	D_5__Bilateria	D_6__Platyhelminthes	D_7__Rhabditophora	D_8__Polycladida	D_9__uncultured eukaryote	D_10__	D_11__	D_12__	D_13__	D_14__	0.71913
98e765e38db35dac092816cac30f13c1	OTU_876	D_0__Eukaryota	D_1__Opisthokonta	D_2__Holozoa	D_3__Metazoa (Animalia)	D_4__Eumetazoa	D_5__Ctenophora	D_6__Tentaculata	D_7__Cydippida	D_8__Pleurobrachia bachei	D_9__	D_10__	D_11__	D_12__	D_13__	D_14__	0.999906
8769a367e74d9798cb04b99034daba6a	OTU_877	D_0__Eukaryota	D_1__SAR	D_2__Stramenopiles													0.882574
6fddc5d44d6c51bfe559571b3601241b	OTU_878	D_0__Eukaryota	D_1__SAR	D_2__Stramenopiles	D_3__Ochrophyta	D_4__Diatomea	D_5__Bacillariophytina	D_6__Bacillariophyceae									0.925757
09237267fed64ae7471fa7ed67305999	OTU_879	D_0__Eukaryota	D_1__Excavata	D_2__Discoba	D_3__Discicristata	D_4__Euglenozoa											0.896696
1a506c3a0748fe272226f2abaae3452a	OTU_880	D_0__Eukaryota	D_1__SAR	D_2__Stramenopiles													0.925722
6f212c0fb9f7c95aa5f95ff1c9f86c38	OTU_881	D_0__Eukaryota	D_1__SAR	D_2__Stramenopiles													0.997544
5624f73a241e8df8999f2f485478e8a0	OTU_882	D_0__Eukaryota															1
5a99cb0f42134f4d632ae60b0f8f3ffa	OTU_883	D_0__Eukaryota	D_1__SAR	D_2__Alveolata	D_3__Dinoflagellata	D_4__Dinophyceae	D_5__Gymnodiniphycidae	D_6__Gymnodinium clade									0.712431
006f6629c741b204679fd05fcbfb5746	OTU_884	D_0__Eukaryota	D_1__Archaeplastida	D_2__Rhodophyceae	D_3__Florideophycidae	D_4__Rhodymeniophycidae											0.999858
409d6eb1619474116a96c3cca3b94b46	OTU_885	D_0__Eukaryota															1
4bdd337dc496d45cfd1f62f0cd51b8d1	OTU_886	D_0__Eukaryota	D_1__SAR	D_2__Stramenopiles	D_3__Labyrinthulomycetes	D_4__Thraustochytriaceae	D_5__Aplanochytrium	D_6__uncultured marine eukaryote	D_7__	D_8__	D_9__	D_10__	D_11__	D_12__	D_13__	D_14__	0.993875
95a345caa20a7fa5085ae0ca5eb8b163	OTU_887	D_0__Eukaryota	D_1__SAR	D_2__Alveolata	D_3__Protalveolata	D_4__Syndiniales	D_5__Syndiniales Group II	D_6__uncultured eukaryote	D_7__	D_8__	D_9__	D_10__	D_11__	D_12__	D_13__	D_14__	0.990758
3020838afea8f18776a42dc9f6800a4b	OTU_888	D_0__Eukaryota	D_1__SAR	D_2__Alveolata	D_3__Dinoflagellata	D_4__Dinophyceae	D_5__Gymnodiniphycidae	D_6__Gymnodinium clade	D_7__Gymnodinium	D_8__uncultured eukaryote	D_9__	D_10__	D_11__	D_12__	D_13__	D_14__	0.733918
ef64a309415d41cf4c256cecafc66ab4	OTU_889	D_0__Eukaryota															1
5791d5123af2a9fd363e55ba5be3cbb2	OTU_890	D_0__Eukaryota	D_1__Opisthokonta	D_2__Holozoa	D_3__Metazoa (Animalia)	D_4__Eumetazoa											0.770027
42366fc5a023abc122aa44ef85188ff2	OTU_891	D_0__Eukaryota															1
90b8cc7b39e8bff01e24427a7c3b06fc	OTU_892	D_0__Eukaryota	D_1__SAR	D_2__Stramenopiles	D_3__Ochrophyta	D_4__Chrysophyceae	D_5__uncultured	D_6__uncultured eukaryote	D_7__	D_8__	D_9__	D_10__	D_11__	D_12__	D_13__	D_14__	0.996785
2234135d2f5e62ccd76354da66cf1d0f	OTU_893	D_0__Eukaryota	D_1__SAR	D_2__Rhizaria	D_3__Retaria	D_4__Polycystinea	D_5__Spumellaria										0.993431
99332cf57677172c3ce2c4f76563932d	OTU_894	D_0__Eukaryota	D_1__SAR	D_2__Stramenopiles	D_3__Ochrophyta	D_4__Chrysophyceae											0.785691
8166ff4cd4f1481127821b6a44437754	OTU_895	D_0__Eukaryota	D_1__SAR	D_2__Stramenopiles	D_3__MAST-8												1
67e015318911e2f6e7ea8dc39f2da215	OTU_896	D_0__Eukaryota	D_1__Opisthokonta	D_2__Holozoa	D_3__Metazoa (Animalia)	D_4__Eumetazoa	D_5__Bilateria	D_6__Annelida	D_7__Polychaeta	D_8__Scolecida	D_9__Terebellida						0.995434
f6814391613bce9ac1ffdc9565e4d114	OTU_897	D_0__Eukaryota															1
a77a933c5d8597b33a1bca55c122aa38	OTU_898	D_0__Eukaryota															1
e1a47bafe9102893889957caf62ce507	OTU_899	D_0__Eukaryota															1
a54271d278be87a7772be2c679c37247	OTU_900	D_0__Eukaryota	D_1__SAR	D_2__Alveolata	D_3__Protalveolata	D_4__Syndiniales	D_5__Syndiniales Group I	D_6__uncultured Duboscquella	D_7__	D_8__	D_9__	D_10__	D_11__	D_12__	D_13__	D_14__	0.999982
3e3d40149aa8c5f86461c3f12a53df02	OTU_901	D_0__Eukaryota	D_1__SAR	D_2__Alveolata													0.989361
deeeae7130dfb49a9e61ac68e9cc2930	OTU_902	D_0__Eukaryota	D_1__Opisthokonta	D_2__Holozoa	D_3__Metazoa (Animalia)	D_4__Eumetazoa	D_5__Bilateria	D_6__Xenacoelomorpha	D_7__Acoelomorpha	D_8__Acoela	D_9__Simplicomorpha gigantorhabditis	D_10__	D_11__	D_12__	D_13__	D_14__	1
b891a89c7735e55b19ade254fc9f1cf4	OTU_903	D_0__Eukaryota	D_1__Opisthokonta	D_2__Holozoa	D_3__Metazoa (Animalia)	D_4__Eumetazoa	D_5__Cnidaria	D_6__Hydrozoa	D_7__Hydroidolina	D_8__Leptothecata	D_9__Tiaropsidium kelseyi	D_10__	D_11__	D_12__	D_13__	D_14__	0.999305
d87418b490da0b34b0aa3734dac0b70f	OTU_904	D_0__Eukaryota	D_1__SAR	D_2__Alveolata	D_3__Dinoflagellata	D_4__Dinophyceae											0.733469
9ba2eff73ebea76bc2fe29bb1c8de67a	OTU_905	D_0__Eukaryota															1
32890957422ed9b117f56b2be94120bb	OTU_906	D_0__Eukaryota	D_1__SAR	D_2__Alveolata	D_3__Protalveolata	D_4__Syndiniales	D_5__Syndiniales Group II	D_6__uncultured syndiniales	D_7__	D_8__	D_9__	D_10__	D_11__	D_12__	D_13__	D_14__	0.994664
73e84ec8b2305d06c79bba0ffd475fd2	OTU_907	D_0__Eukaryota	D_1__SAR	D_2__Stramenopiles	D_3__Incertae Sedis	D_4__Pirsonia	D_5__Pirsonia verrucosa	D_6__	D_7__	D_8__	D_9__	D_10__	D_11__	D_12__	D_13__	D_14__	0.730621
d224c1e154669cd868146597f60e2380	OTU_908	D_0__Eukaryota															1
8fd7807f10d2b467e0d29ad56dc57255	OTU_909	D_0__Eukaryota	D_1__SAR	D_2__Stramenopiles	D_3__Ochrophyta	D_4__Diatomea	D_5__Bacillariophytina	D_6__Bacillariophyceae									0.971236
4f66e86449257a03b7fdc6ef6daa752e	OTU_910	D_0__Eukaryota	D_1__SAR	D_2__Alveolata	D_3__Ciliophora	D_4__Intramacronucleata	D_5__Spirotrichea	D_6__Oligotrichia									0.99615
ae570f38692580bac07044df6c6f1e34	OTU_911	D_0__Eukaryota															1
6b0798e191c33759131903a43b1dbc3e	OTU_912	D_0__Eukaryota															1
1389c301ff80037ebea52657d6bbee3d	OTU_913	D_0__Eukaryota	D_1__SAR	D_2__Alveolata	D_3__Apicomplexa	D_4__Conoidasida	D_5__Gregarinasina	D_6__Archigregarinorida	D_7__Selenidium								0.780834
35713afb877ab9767db811d5ba939944	OTU_914	D_0__Eukaryota	D_1__SAR	D_2__Rhizaria	D_3__Cercozoa	D_4__Chlorarachniophyta	D_5__NOR26	D_6__uncultured eukaryote	D_7__	D_8__	D_9__	D_10__	D_11__	D_12__	D_13__	D_14__	1
c4683ece2a5332287812190ba048a1bf	OTU_915	D_0__Eukaryota															1
f1362897a64a8f1918b98d0d9ca2bdce	OTU_916	D_0__Eukaryota	D_1__SAR	D_2__Stramenopiles													0.983054
00361504e62699ebbc7b8501205e94da	OTU_917	D_0__Eukaryota	D_1__SAR	D_2__Stramenopiles	D_3__Ochrophyta	D_4__Diatomea											0.976937
102f493c661139d66140c9d0e11f1f5f	OTU_918	D_0__Eukaryota	D_1__Opisthokonta	D_2__Holozoa	D_3__Metazoa (Animalia)	D_4__Eumetazoa	D_5__Bilateria	D_6__Arthropoda	D_7__Crustacea	D_8__Maxillopoda	D_9__Copepoda	D_10__Calanoida	D_11__uncultured eukaryote	D_12__	D_13__	D_14__	0.977047
cde1c8c66c7a5e95b6ab76eb99fd92dd	OTU_919	D_0__Eukaryota	D_1__SAR	D_2__Stramenopiles	D_3__Ochrophyta	D_4__Diatomea	D_5__Coscinodiscophytina	D_6__Actinocyclus	D_7__Actinocyclus curvatulus	D_8__	D_9__	D_10__	D_11__	D_12__	D_13__	D_14__	1
01ff0ecfc487c42fd4120a9235fa4069	OTU_920	D_0__Eukaryota	D_1__SAR	D_2__Stramenopiles													0.997981
305730c18c4c59804e95e746b21eca13	OTU_921	D_0__Eukaryota	D_1__SAR	D_2__Alveolata	D_3__Dinoflagellata	D_4__Dinophyceae	D_5__Prorocentrales	D_6__Prorocentrum	D_7__uncultured eukaryote	D_8__	D_9__	D_10__	D_11__	D_12__	D_13__	D_14__	0.920956
ee01e5e6a4dbc6e70757976b769a1087	OTU_922	D_0__Eukaryota	D_1__Opisthokonta	D_2__Nucletmycea	D_3__Fungi	D_4__Dikarya	D_5__Basidiomycota	D_6__Agaricomycotina	D_7__Agaricomycetes	D_8__Agaricales							0.753617
41f38f60972fb1805cf290b6b43000eb	OTU_923	D_0__Eukaryota	D_1__SAR	D_2__Alveolata	D_3__Dinoflagellata	D_4__Dinophyceae	D_5__Gymnodiniphycidae	D_6__Gymnodinium clade	D_7__Paragymnodinium	D_8__Paragymnodinium shiwhaense	D_9__	D_10__	D_11__	D_12__	D_13__	D_14__	0.777935
16fff64e55ab5311c7796e20a94e2eae	OTU_924	D_0__Eukaryota	D_1__Opisthokonta	D_2__Holozoa	D_3__Metazoa (Animalia)	D_4__Porifera	D_5__Demospongiae	D_6__Haplosclerida	D_7__Haliclona amboinensis	D_8__	D_9__	D_10__	D_11__	D_12__	D_13__	D_14__	0.999998
d3d330ad818731b570192fa3fe45196a	OTU_925	D_0__Eukaryota	D_1__SAR	D_2__Stramenopiles	D_3__Ochrophyta	D_4__Diatomea											0.98693
7781618880f9a2d384e8797c537c5455	OTU_926	D_0__Eukaryota	D_1__SAR	D_2__Alveolata	D_3__Dinoflagellata	D_4__Dinophyceae											0.808483
f362c30945d5dd313b5d4191a7aacb11	OTU_927	D_0__Eukaryota	D_1__SAR	D_2__Stramenopiles	D_3__Ochrophyta	D_4__Diatomea	D_5__Bacillariophytina										0.709109
b4eaaf01629f4934f53279885001f499	OTU_928	D_0__Eukaryota	D_1__Opisthokonta														0.765468
0790cfa8cf768dc876c5998a526ed899	OTU_929	D_0__Eukaryota	D_1__Opisthokonta	D_2__Holozoa	D_3__Metazoa (Animalia)	D_4__Eumetazoa	D_5__Bilateria	D_6__Arthropoda	D_7__Crustacea	D_8__Maxillopoda	D_9__Copepoda						0.912179
5e7241a13c2858cae50e80d35b2a6253	OTU_930	D_0__Eukaryota															1
8f3cc2cbfe2dafd73d84e899ecc0ccb7	OTU_931	D_0__Eukaryota	D_1__SAR	D_2__Alveolata	D_3__Ciliophora	D_4__Intramacronucleata	D_5__Conthreep	D_6__Phyllopharyngea	D_7__Cyrtophoria	D_8__Pithites	D_9__uncultured eukaryote	D_10__	D_11__	D_12__	D_13__	D_14__	1
336bb1f28f156fe8b7e1008d2876138e	OTU_932	D_0__Eukaryota	D_1__SAR	D_2__Stramenopiles	D_3__Ochrophyta	D_4__Diatomea	D_5__Bacillariophytina	D_6__Bacillariophyceae	D_7__Amphora								0.785946
355b3fd304cb8c3b4b6529bc25d38da0	OTU_933	D_0__Eukaryota	D_1__Opisthokonta	D_2__Holozoa	D_3__Metazoa (Animalia)	D_4__Eumetazoa	D_5__Bilateria										0.779845
29f0fa0e84f1519fd9ca6956a9b61b4c	OTU_934	D_0__Eukaryota															1
a4dea37a466bba65f24520a32ae23abb	OTU_935	D_0__Eukaryota	D_1__Opisthokonta	D_2__Holozoa	D_3__Metazoa (Animalia)	D_4__Eumetazoa	D_5__Bilateria	D_6__Annelida	D_7__Polychaeta	D_8__Palpata	D_9__Phyllodocida	D_10__Pelagomacellicephala iliffei	D_11__	D_12__	D_13__	D_14__	0.7993
f90a59f4f53941c662588f173b9d0d59	OTU_936	D_0__Eukaryota	D_1__Cryptophyceae	D_2__Cryptomonadales	D_3__uncultured eukaryote	D_4__	D_5__	D_6__	D_7__	D_8__	D_9__	D_10__	D_11__	D_12__	D_13__	D_14__	1
5961c273675af29bf626f039027d787c	OTU_937	D_0__Eukaryota	D_1__Opisthokonta	D_2__Nucletmycea	D_3__Fungi	D_4__Dikarya	D_5__Ascomycota	D_6__Pezizomycotina	D_7__Eurotiomycetes	D_8__Eurotiales	D_9__Aspergillaceae	D_10__Penicillium	D_11__Penicillium sp. MI 31	D_12__	D_13__	D_14__	0.998204
c57884896d327395d4b71f7e9c019609	OTU_938	D_0__Eukaryota	D_1__SAR	D_2__Alveolata													0.999341
2c19e96112c5f9ea656d2e4caea223f2	OTU_939	D_0__Eukaryota															1
d13c8e913d430c5f8fc90593131b9636	OTU_940	D_0__Eukaryota	D_1__Opisthokonta	D_2__Holozoa	D_3__Metazoa (Animalia)	D_4__Eumetazoa											0.812183
7e49dbbd1d2e2ddafb8e7b4259c73a89	OTU_941	D_0__Eukaryota	D_1__SAR	D_2__Alveolata													0.992939
cde486094531f822ac5732b9bfa71bd4	OTU_942	D_0__Eukaryota	D_1__SAR	D_2__Stramenopiles	D_3__Ochrophyta												0.914251
0eca93dbb2512f07c27aff0c53eb74be	OTU_943	D_0__Eukaryota	D_1__SAR	D_2__Alveolata													0.884454
4903d53cde5f2c86ee6144abecb0b23c	OTU_944	D_0__Eukaryota	D_1__Opisthokonta	D_2__Holozoa	D_3__Metazoa (Animalia)	D_4__Eumetazoa	D_5__Bilateria	D_6__Annelida	D_7__Polychaeta	D_8__Palpata	D_9__Phyllodocida	D_10__Kefersteinia cirrata	D_11__	D_12__	D_13__	D_14__	0.873977
333002c48bb8b96bc8321165a8da9a42	OTU_945	D_0__Eukaryota	D_1__SAR														0.777066
e7920eadb1b1f7f04e2e12f46e6ec77d	OTU_946	D_0__Eukaryota	D_1__SAR	D_2__Stramenopiles	D_3__Ochrophyta	D_4__Chrysophyceae	D_5__uncultured	D_6__uncultured eukaryote	D_7__	D_8__	D_9__	D_10__	D_11__	D_12__	D_13__	D_14__	0.867308
b929982d3334a24fd0880f4c8149e81f	OTU_947	D_0__Eukaryota	D_1__SAR	D_2__Stramenopiles	D_3__MAST-4	D_4__MAST-4A	D_5__uncultured stramenopile	D_6__	D_7__	D_8__	D_9__	D_10__	D_11__	D_12__	D_13__	D_14__	0.920542
fb0e6db20eb4113a4ed4825b2fa75d25	OTU_948	D_0__Eukaryota	D_1__SAR	D_2__Alveolata	D_3__Dinoflagellata												0.854975
017fe4dace06671290a918ca61ced4f4	OTU_949	D_0__Eukaryota															1
d792d4cea6b7a1f80d1cd7a0e1e674ab	OTU_950	D_0__Eukaryota	D_1__SAR	D_2__Stramenopiles	D_3__Ochrophyta	D_4__Diatomea	D_5__Bacillariophytina	D_6__Bacillariophyceae									0.944897
9b0bb9f552af1bc3ddaa3b9bcd5ca974	OTU_951	D_0__Eukaryota	D_1__SAR	D_2__Stramenopiles	D_3__Ochrophyta	D_4__Diatomea	D_5__Bacillariophytina										0.779708
46b855491ce929b9d18d9c2d55c3699d	OTU_952	D_0__Eukaryota	D_1__Opisthokonta	D_2__Holozoa	D_3__Metazoa (Animalia)	D_4__Eumetazoa	D_5__Cnidaria	D_6__Anthozoa	D_7__Octocorallia	D_8__Alcyonacea	D_9__Dendronephthya putteri	D_10__	D_11__	D_12__	D_13__	D_14__	0.961338
db9efc7682ef04461346a26f5a2a2ec2	OTU_953	D_0__Eukaryota	D_1__SAR	D_2__Rhizaria	D_3__Retaria	D_4__Acantharia											0.959484
6c9244c8218858d9d03859e79087ad8c	OTU_954	D_0__Eukaryota	D_1__SAR	D_2__Alveolata	D_3__Ciliophora	D_4__Intramacronucleata	D_5__Spirotrichea	D_6__Oligotrichia	D_7__Spirotontonia	D_8__uncultured marine eukaryote	D_9__	D_10__	D_11__	D_12__	D_13__	D_14__	0.809707
d0f92075ebaedee6c01d7421f2acc701	OTU_955	D_0__Eukaryota	D_1__SAR	D_2__Stramenopiles	D_3__Ochrophyta	D_4__Diatomea	D_5__Bacillariophytina	D_6__Mediophyceae									0.993035
026b5972bbff3c7daa1bbac761b9b9fd	OTU_956	D_0__Eukaryota	D_1__SAR	D_2__Rhizaria	D_3__Cercozoa	D_4__Vampyrellidae	D_5__uncultured	D_6__Thalassomyxa sp. MVa1x	D_7__	D_8__	D_9__	D_10__	D_11__	D_12__	D_13__	D_14__	0.992393
179fa595c591c51b7947253366275a41	OTU_957	D_0__Eukaryota	D_1__Opisthokonta														0.733009
4d3db3591974b71509500585bd052b1e	OTU_958	D_0__Eukaryota															1
28b9750cea370674267fef57a13dc6b9	OTU_959	D_0__Eukaryota	D_1__Archaeplastida	D_2__Chloroplastida	D_3__Chlorophyta	D_4__Ulvophyceae	D_5__marine metagenome	D_6__	D_7__	D_8__	D_9__	D_10__	D_11__	D_12__	D_13__	D_14__	0.999999
baebd009d03bc9be76888a3f10ab2ea7	OTU_960	D_0__Eukaryota	D_1__Opisthokonta	D_2__Holozoa	D_3__Metazoa (Animalia)	D_4__Eumetazoa	D_5__Cnidaria	D_6__Anthozoa	D_7__Hexacorallia								0.708619
591e91b8d320f48046b037f20b6d8942	OTU_961	D_0__Eukaryota	D_1__SAR	D_2__Alveolata	D_3__Protalveolata	D_4__Syndiniales	D_5__Syndiniales Group II	D_6__uncultured eukaryote	D_7__	D_8__	D_9__	D_10__	D_11__	D_12__	D_13__	D_14__	0.895221
8a161f1a9dd6fb3e6a1f8b2c3f99a0e0	OTU_962	D_0__Eukaryota															1
34ca0bdea7bde7da09d2aaa70ef4e59d	OTU_963	D_0__Eukaryota															1
559689796a17ca8dbc32ec152853f003	OTU_964	D_0__Eukaryota	D_1__Excavata	D_2__Discoba	D_3__Discicristata	D_4__Euglenozoa	D_5__Diplonemea	D_6__Diplonema	D_7__Diplonema sp. ATCC 50225	D_8__	D_9__	D_10__	D_11__	D_12__	D_13__	D_14__	0.76659
9d207f0e34156c052cabb06da80d8634	OTU_965	D_0__Eukaryota	D_1__Incertae Sedis	D_2__Telonema	D_3__uncultured eukaryote	D_4__	D_5__	D_6__	D_7__	D_8__	D_9__	D_10__	D_11__	D_12__	D_13__	D_14__	0.994625
a1040ce506e4b6a606c797cf69192f3f	OTU_966	D_0__Eukaryota	D_1__Opisthokonta	D_2__Holozoa	D_3__Metazoa (Animalia)	D_4__Eumetazoa	D_5__Bilateria	D_6__Hemichordata	D_7__Enteropneusta	D_8__Harrimaniidae							0.977292
a7d6081bcbb6acb45ad72c716cdd1520	OTU_967	D_0__Eukaryota															1
4f511571264e2d3889821e819a9b0468	OTU_968	D_0__Eukaryota	D_1__Opisthokonta	D_2__Holozoa	D_3__Metazoa (Animalia)	D_4__Eumetazoa	D_5__Bilateria										0.840045
7d172b06f4d318709372a17b726220c9	OTU_969	D_0__Eukaryota															1
6a68a31dc9020083dfdd92a176255aa3	OTU_970	D_0__Eukaryota															1
73a48f9000ba745fbd7a3ea7b570ddab	OTU_971	D_0__Eukaryota	D_1__SAR	D_2__Rhizaria	D_3__Cercozoa	D_4__Ascetosporea	D_5__Paradiniidae	D_6__Paradinium	D_7__uncultured marine eukaryote	D_8__	D_9__	D_10__	D_11__	D_12__	D_13__	D_14__	0.91288
8a94db53d854f9d9c26096e8d16b05d1	OTU_972	D_0__Eukaryota	D_1__SAR	D_2__Alveolata	D_3__Ciliophora	D_4__Intramacronucleata	D_5__Conthreep	D_6__Oligohymenophorea	D_7__Apostomatia	D_8__Cinetochilum	D_9__Cinetochilum ovale	D_10__	D_11__	D_12__	D_13__	D_14__	0.987573
afef5ecec1a5d1862b6b1f8a2b4f2c72	OTU_973	D_0__Eukaryota	D_1__SAR	D_2__Alveolata	D_3__Ciliophora	D_4__Intramacronucleata											0.992464
3e754e3da26a8b0e2a95d49710eb3546	OTU_974	D_0__Eukaryota															1
4703db483f5dba6091bdd88259700184	OTU_975	D_0__Eukaryota	D_1__Opisthokonta	D_2__Holozoa	D_3__Metazoa (Animalia)	D_4__Eumetazoa	D_5__Bilateria	D_6__Arthropoda	D_7__Crustacea	D_8__Maxillopoda	D_9__Copepoda						0.998928
72a73f3585a17dc1baf2416d45d66857	OTU_976	D_0__Eukaryota	D_1__SAR	D_2__Stramenopiles	D_3__MAST-8												0.76996
c260239cabebbc53e62f8b54b282cc34	OTU_977	D_0__Eukaryota															1
82ec8ffa4a62d3dda47208a3c2430b69	OTU_978	D_0__Eukaryota	D_1__Opisthokonta	D_2__Holozoa	D_3__Metazoa (Animalia)	D_4__Eumetazoa	D_5__Bilateria	D_6__Arthropoda	D_7__Crustacea	D_8__Maxillopoda	D_9__Copepoda	D_10__Poecilostomatoida	D_11__uncultured eukaryote	D_12__	D_13__	D_14__	0.995453
759a4e2e4f1703388a6827b5e7656cfa	OTU_979	D_0__Eukaryota	D_1__Haptophyta	D_2__Prymnesiophyceae													0.99956
77498d461e47ed9e231ed533122ee565	OTU_980	D_0__Eukaryota	D_1__Opisthokonta	D_2__Holozoa	D_3__Metazoa (Animalia)	D_4__Eumetazoa	D_5__Bilateria	D_6__Xenacoelomorpha	D_7__Acoelomorpha	D_8__Acoela							0.719082
45f97ca02bdd289864b6dc65e82202cd	OTU_981	D_0__Eukaryota	D_1__SAR	D_2__Alveolata	D_3__Protalveolata	D_4__Syndiniales	D_5__Syndiniales Group II	D_6__uncultured marine eukaryote	D_7__	D_8__	D_9__	D_10__	D_11__	D_12__	D_13__	D_14__	0.962672
eae9404e002f273afb975a3f00154f7c	OTU_982	D_0__Eukaryota	D_1__Opisthokonta	D_2__Holozoa	D_3__Metazoa (Animalia)	D_4__Eumetazoa	D_5__Bilateria	D_6__Gastrotricha	D_7__Chaetonotida	D_8__Chaetonotus neptuni	D_9__	D_10__	D_11__	D_12__	D_13__	D_14__	0.995391
049acb1cb8c8405de3ee2235d67df099	OTU_983	D_0__Eukaryota	D_1__Excavata	D_2__Discoba	D_3__Discicristata	D_4__Euglenozoa	D_5__Diplonemea	D_6__SCM38C39 marine group	D_7__uncultured eukaryote	D_8__	D_9__	D_10__	D_11__	D_12__	D_13__	D_14__	0.876165
35557e5855110c4ee58859feb6f8fdd7	OTU_984	D_0__Eukaryota	D_1__Opisthokonta	D_2__Holozoa	D_3__Metazoa (Animalia)	D_4__Eumetazoa	D_5__Bilateria	D_6__Arthropoda	D_7__Crustacea	D_8__Maxillopoda	D_9__Copepoda	D_10__Calanoida	D_11__uncultured eukaryote	D_12__	D_13__	D_14__	0.787725
9bf626defbf2953d535fad16b77e3d75	OTU_985	D_0__Eukaryota	D_1__Opisthokonta	D_2__Holozoa	D_3__Metazoa (Animalia)	D_4__Eumetazoa	D_5__Bilateria										0.97878
c742840c5a0ced5c9d2b47cfaf9affa4	OTU_986	D_0__Eukaryota															1
f0f0955dda09229701f0f9fcd6d949a7	OTU_987	D_0__Eukaryota	D_1__SAR	D_2__Alveolata	D_3__Protalveolata	D_4__Syndiniales	D_5__uncultured Duboscquella	D_6__	D_7__	D_8__	D_9__	D_10__	D_11__	D_12__	D_13__	D_14__	0.999936
a371091c3c05bd860c97db4caa15bfcf	OTU_988	D_0__Eukaryota															1
8875734de33cf2cc1f848fe9cdfef2f1	OTU_989	D_0__Eukaryota	D_1__SAR	D_2__Alveolata													0.999999
e911d344d831675d9d57e48ee02821f0	OTU_990	D_0__Eukaryota															1
3d1004d790000d20c7d78dec2d2f1ac7	OTU_991	D_0__Eukaryota	D_1__SAR	D_2__Alveolata	D_3__Dinoflagellata	D_4__Dinophyceae											0.952063
5343ac69bdc014d2c52b7f786498f2a5	OTU_992	D_0__Eukaryota	D_1__Opisthokonta														0.948831
0d59d323b38acb3bc8237e9434f2a0f1	OTU_993	D_0__Eukaryota	D_1__SAR	D_2__Stramenopiles	D_3__Ochrophyta	D_4__Diatomea	D_5__Bacillariophytina	D_6__Bacillariophyceae									0.905018
1ea0ff126316e4a53174f3ab9ef5b1a9	OTU_994	D_0__Eukaryota	D_1__SAR	D_2__Alveolata													0.999486
64684c8037ed345b5f102018c3e42ae7	OTU_995	D_0__Eukaryota	D_1__SAR	D_2__Alveolata													0.990154
4d14f84c30e222badafdac024025349d	OTU_996	D_0__Eukaryota	D_1__SAR	D_2__Stramenopiles	D_3__Labyrinthulomycetes	D_4__uncultured	D_5__Oblongichytrium sp. TN6	D_6__	D_7__	D_8__	D_9__	D_10__	D_11__	D_12__	D_13__	D_14__	0.999164
7ed16db1b64ae75bf9faca1ffd9128a9	OTU_997	D_0__Eukaryota															1
9abc452c69c745c80c745ae33e861751	OTU_998	D_0__Eukaryota	D_1__SAR	D_2__Alveolata													0.996409
99a9c0517959a49d6a1b7cfc05f030cd	OTU_999	D_0__Eukaryota															1
afe94f17f1ca60cc26d48f60f9981be7	OTU_1000	D_0__Eukaryota	D_1__Opisthokonta	D_2__Holozoa	D_3__Metazoa (Animalia)	D_4__Eumetazoa	D_5__Bilateria										0.999962
ac68e3a58e623d95997c4bf63bb5a025	OTU_1001	D_0__Eukaryota															1
6d716925108d6b4f0f9285e6c8faaaf7	OTU_1002	D_0__Eukaryota	D_1__Opisthokonta	D_2__Holozoa	D_3__Metazoa (Animalia)	D_4__Eumetazoa	D_5__Cnidaria	D_6__Anthozoa	D_7__Octocorallia	D_8__Alcyonacea	D_9__Dendronephthya putteri	D_10__	D_11__	D_12__	D_13__	D_14__	0.734781
44dbc2a8823efdf182d6266d5804c420	OTU_1003	D_0__Eukaryota	D_1__SAR	D_2__Alveolata	D_3__Dinoflagellata	D_4__Dinophyceae	D_5__Peridiniphycidae	D_6__Gonyaulacales	D_7__Neoceratium	D_8__uncultured eukaryote	D_9__	D_10__	D_11__	D_12__	D_13__	D_14__	0.998329
d37370e3548fa95f9c776b2ae91d822c	OTU_1004	D_0__Eukaryota	D_1__SAR	D_2__Stramenopiles	D_3__Peronosporomycetes												0.998313
cddfe11d0cee76700d1da01c3b8722ba	OTU_1005	D_0__Eukaryota	D_1__SAR	D_2__Alveolata	D_3__Dinoflagellata	D_4__Dinophyceae											0.946357
bcbffe8f41ab6bd611ab4d25fc14114b	OTU_1006	D_0__Eukaryota	D_1__SAR	D_2__Stramenopiles	D_3__Labyrinthulomycetes	D_4__Thraustochytriaceae	D_5__Aplanochytrium	D_6__uncultured eukaryote	D_7__	D_8__	D_9__	D_10__	D_11__	D_12__	D_13__	D_14__	0.981554
b4b5083016373f6b8b0cda76823fbe5a	OTU_1007	D_0__Eukaryota	D_1__SAR	D_2__Stramenopiles													0.998495
0287834c95035e535a0cb58018b0add9	OTU_1008	D_0__Eukaryota	D_1__Opisthokonta	D_2__Holozoa	D_3__Metazoa (Animalia)	D_4__Eumetazoa	D_5__Bilateria	D_6__Echinodermata	D_7__Ophiuroidea								0.946977
fbcaa930da0e6d294856e2e2bf564b49	OTU_1009	D_0__Eukaryota															1
75fd01f2a9a5c5b0d6b684530be43690	OTU_1010	D_0__Eukaryota	D_1__SAR	D_2__Alveolata	D_3__Dinoflagellata	D_4__Dinophyceae	D_5__Peridiniphycidae	D_6__Peridiniales	D_7__Protoperidinium	D_8__uncultured marine eukaryote	D_9__	D_10__	D_11__	D_12__	D_13__	D_14__	0.990819
30e4d62373219c78f9cbb3b99fecea90	OTU_1011	D_0__Eukaryota	D_1__Opisthokonta	D_2__Holozoa	D_3__Metazoa (Animalia)	D_4__Porifera	D_5__Calcarea	D_6__Calcinea	D_7__Clathrinida	D_8__Leucetta sp. Manuel H2	D_9__	D_10__	D_11__	D_12__	D_13__	D_14__	0.926867
ba425a153e215fbd503dd8475ad16da6	OTU_1012	D_0__Eukaryota															1
46339bdf98dce1104e12d98ad2961e89	OTU_1013	D_0__Eukaryota	D_1__Opisthokonta														0.964898
79a0fe70eef18be59e2fef4527eb4160	OTU_1014	D_0__Eukaryota	D_1__Opisthokonta														0.974701
741c2261997f3ac919f24133366c0b49	OTU_1015	D_0__Eukaryota	D_1__SAR	D_2__Rhizaria	D_3__Retaria	D_4__Polycystinea	D_5__Spumellaria										0.997037
ea2b3e3cde7fb93a20de5446311765bd	OTU_1016	D_0__Eukaryota															1
0739d96ec130a23079faaffda8e208f8	OTU_1017	D_0__Eukaryota	D_1__SAR	D_2__Alveolata	D_3__Dinoflagellata	D_4__Dinophyceae	D_5__Peridiniphycidae	D_6__Peridiniales	D_7__Peridinium	D_8__uncultured eukaryote	D_9__	D_10__	D_11__	D_12__	D_13__	D_14__	0.806728
9c5b45fcbc1e49f485a5a379865ada73	OTU_1018	D_0__Eukaryota	D_1__Opisthokonta	D_2__Holozoa	D_3__Metazoa (Animalia)	D_4__Eumetazoa	D_5__Bilateria										0.702555
0029dc7ef9a9d68873c07b38b4a1ef8f	OTU_1019	D_0__Eukaryota	D_1__Opisthokonta	D_2__Holozoa	D_3__Metazoa (Animalia)	D_4__Porifera	D_5__Calcarea	D_6__Calcinea	D_7__Clathrinida	D_8__Leucetta sp. Manuel H2	D_9__	D_10__	D_11__	D_12__	D_13__	D_14__	0.999295
4f22baea4f688506fa3d84bb6edf096e	OTU_1020	D_0__Eukaryota															1
e1c24be99d74008c969ed711eaa969e7	OTU_1021	D_0__Eukaryota	D_1__Opisthokonta	D_2__Nucletmycea	D_3__Fungi	D_4__Dikarya											0.79367
d71dda64c8f1e2c9255816f46e705ad9	OTU_1022	D_0__Eukaryota	D_1__Opisthokonta	D_2__Nucletmycea	D_3__Fungi	D_4__Dikarya	D_5__Ascomycota	D_6__Pezizomycotina	D_7__Eurotiomycetes	D_8__Eurotiales	D_9__Aspergillaceae	D_10__Aspergillus					0.999952
9c6c397dcb00b1443165914c7793ac27	OTU_1023	D_0__Eukaryota	D_1__SAR	D_2__Stramenopiles	D_3__Ochrophyta	D_4__Diatomea	D_5__Bacillariophytina	D_6__Mediophyceae	D_7__Chaetoceros								0.994951
a6883d66b8a826cf80ae003277d0d114	OTU_1024	D_0__Eukaryota	D_1__SAR	D_2__Stramenopiles													1
b086304112a3635dcbd9b81c031452cc	OTU_1025	D_0__Eukaryota	D_1__SAR	D_2__Stramenopiles	D_3__MAST-1	D_4__MAST-1C	D_5__uncultured eukaryote	D_6__	D_7__	D_8__	D_9__	D_10__	D_11__	D_12__	D_13__	D_14__	0.995913
3391fe9845ea7bbb2ba9de253b1379e2	OTU_1026	D_0__Eukaryota	D_1__SAR	D_2__Stramenopiles	D_3__MAST-7	D_4__MAST-7B	D_5__uncultured marine eukaryote	D_6__	D_7__	D_8__	D_9__	D_10__	D_11__	D_12__	D_13__	D_14__	0.817195
e4aab4a11eb48c7c6125d33c0625de9e	OTU_1027	D_0__Eukaryota	D_1__SAR	D_2__Alveolata	D_3__Protalveolata	D_4__Syndiniales	D_5__Syndiniales Group II	D_6__uncultured eukaryote	D_7__	D_8__	D_9__	D_10__	D_11__	D_12__	D_13__	D_14__	0.923241
a30b9248e6d825b19a00b9a1ab5abf81	OTU_1028	D_0__Eukaryota															1
2be463f547bb27f7b5ab6f61587b5604	OTU_1029	D_0__Eukaryota	D_1__Opisthokonta	D_2__Holozoa	D_3__Metazoa (Animalia)	D_4__Eumetazoa	D_5__Cnidaria										0.724413
1a2999671f3ce601396e819ff07de831	OTU_1030	D_0__Eukaryota															1
4007a3ac3762087054a25ba2152d468d	OTU_1031	D_0__Eukaryota	D_1__SAR	D_2__Stramenopiles	D_3__Ochrophyta												0.996798
e81da2d3e4f0a5a737f788e7efd40f8d	OTU_1032	D_0__Eukaryota	D_1__SAR	D_2__Stramenopiles	D_3__Ochrophyta	D_4__Diatomea	D_5__Bacillariophytina	D_6__Bacillariophyceae	D_7__Navicula	D_8__uncultured eukaryote	D_9__	D_10__	D_11__	D_12__	D_13__	D_14__	0.726278
1f4ed43f19e6e69d30c58844e3d8cb32	OTU_1033	D_0__Eukaryota															1
1e79dcb13b46d7067cdc1a9d6d6f6521	OTU_1034	D_0__Eukaryota	D_1__SAR	D_2__Stramenopiles	D_3__Ochrophyta	D_4__Chrysophyceae											0.979116
eaf3bd7d778741e9e69abd430eb7d692	OTU_1035	D_0__Eukaryota	D_1__SAR	D_2__Alveolata	D_3__Dinoflagellata	D_4__Dinophyceae											0.811199
c46c01eaa69c06866f66734fc2488b6b	OTU_1036	D_0__Eukaryota	D_1__Opisthokonta	D_2__Holozoa	D_3__Metazoa (Animalia)	D_4__Eumetazoa	D_5__Bilateria	D_6__Arthropoda	D_7__Crustacea	D_8__Maxillopoda	D_9__Copepoda	D_10__Calanoida	D_11__Sinocalanus sinensis	D_12__	D_13__	D_14__	0.981852
c2a9bdb7f54d2f563c76d81d3fc655ab	OTU_1037	D_0__Eukaryota	D_1__SAR	D_2__Stramenopiles	D_3__MAST-3	D_4__MAST-3E	D_5__uncultured stramenopile	D_6__	D_7__	D_8__	D_9__	D_10__	D_11__	D_12__	D_13__	D_14__	0.999253
da65a0d8511c032ba839a6c374a3a829	OTU_1038	D_0__Eukaryota	D_1__SAR	D_2__Stramenopiles	D_3__Ochrophyta	D_4__Diatomea	D_5__Bacillariophytina	D_6__Mediophyceae	D_7__Chaetoceros								0.705699
2ee9c164707d7e97593ef67e2b59cec1	OTU_1039	D_0__Eukaryota															1
d410456e2a09ad95b1cf92c05af3ab8f	OTU_1040	D_0__Eukaryota	D_1__Opisthokonta	D_2__Holozoa	D_3__Metazoa (Animalia)	D_4__Eumetazoa	D_5__Bilateria	D_6__Xenacoelomorpha	D_7__Acoelomorpha	D_8__Acoela							0.795043
dea494c82a21ec3d5739089c814d6de8	OTU_1041	D_0__Eukaryota	D_1__SAR	D_2__Alveolata	D_3__Protalveolata	D_4__Syndiniales											0.851431
36448c24cd12ad655d298357eac18472	OTU_1042	D_0__Eukaryota	D_1__SAR	D_2__Stramenopiles	D_3__Ochrophyta	D_4__Diatomea	D_5__Bacillariophytina	D_6__Mediophyceae									0.779234
b4791251652d0445da412f8413c5d974	OTU_1043	D_0__Eukaryota	D_1__SAR	D_2__Stramenopiles	D_3__Ochrophyta	D_4__Diatomea	D_5__Bacillariophytina	D_6__Bacillariophyceae									0.987852
aa376d9b4f918a4167914fe87a3af652	OTU_1044	D_0__Eukaryota	D_1__SAR	D_2__Stramenopiles	D_3__Ochrophyta	D_4__Diatomea	D_5__Bacillariophytina	D_6__Bacillariophyceae	D_7__Amphora	D_8__Amphora subtropica	D_9__	D_10__	D_11__	D_12__	D_13__	D_14__	0.991528
f4ae5c21d677e21e7a6aeeb17818c257	OTU_1045	D_0__Eukaryota	D_1__SAR	D_2__Alveolata	D_3__Ciliophora	D_4__Intramacronucleata	D_5__Spirotrichea	D_6__Oligotrichia	D_7__Spirotontonia	D_8__uncultured Tintinnida	D_9__	D_10__	D_11__	D_12__	D_13__	D_14__	0.921231
9bd795e2154bd7d652c1e10562f040f9	OTU_1046	D_0__Eukaryota	D_1__SAR	D_2__Alveolata	D_3__Dinoflagellata	D_4__Dinophyceae											0.889376
5c986e9f13f54f2b6daed45924d8e8d4	OTU_1047	D_0__Eukaryota															1
12047bb0de42e1d15ba48d1c1e2bc6d5	OTU_1048	D_0__Eukaryota	D_1__Opisthokonta	D_2__Holozoa	D_3__Metazoa (Animalia)	D_4__Eumetazoa	D_5__Bilateria	D_6__Annelida	D_7__Polychaeta	D_8__Scolecida	D_9__Terebellida	D_10__Lysilla sp. THS-2012	D_11__	D_12__	D_13__	D_14__	0.982789
6693e64644e1c865e05ae61546029e60	OTU_1049	D_0__Eukaryota															1
e009751183ee6978e49978bf95793b61	OTU_1050	D_0__Eukaryota	D_1__SAR	D_2__Alveolata	D_3__Protalveolata	D_4__Syndiniales	D_5__Duboscquella	D_6__uncultured eukaryote	D_7__	D_8__	D_9__	D_10__	D_11__	D_12__	D_13__	D_14__	0.986726
e33e08716073afa41df20f4fb6aa193b	OTU_1051	D_0__Eukaryota	D_1__SAR	D_2__Stramenopiles	D_3__Ochrophyta	D_4__Diatomea	D_5__Bacillariophytina	D_6__Bacillariophyceae									0.748553
65b80072dc1c82eaacffdd5bf12ac66d	OTU_1052	D_0__Eukaryota	D_1__SAR	D_2__Alveolata	D_3__Dinoflagellata	D_4__Dinophyceae											0.724435
96d7c2dcbe841c22367fbd8eae699e13	OTU_1053	D_0__Eukaryota															1
84d3717a55c961164daf5e6a948d42c9	OTU_1054	D_0__Eukaryota	D_1__SAR	D_2__Alveolata													0.985116
467d7c778a65fe8bfe9d2ce97c1bce6f	OTU_1055	D_0__Eukaryota	D_1__SAR	D_2__Stramenopiles	D_3__Ochrophyta	D_4__Diatomea	D_5__Bacillariophytina	D_6__Bacillariophyceae									0.960642
f87dcc78a0e6e82cea57e3dfaf7205cd	OTU_1056	D_0__Eukaryota	D_1__SAR	D_2__Rhizaria	D_3__Retaria	D_4__Foraminifera	D_5__Globothalamea	D_6__Rotaliida									1
7979531ebc62884481bbe5c9e6cfd02a	OTU_1057	D_0__Eukaryota	D_1__SAR	D_2__Alveolata	D_3__Ciliophora	D_4__Intramacronucleata	D_5__Conthreep										0.939664
428319cf30633c458dbcc8f4b237575f	OTU_1058	D_0__Eukaryota	D_1__SAR	D_2__Stramenopiles	D_3__Ochrophyta	D_4__Diatomea	D_5__Bacillariophytina	D_6__Bacillariophyceae	D_7__Fragilariopsis	D_8__uncultured eukaryote	D_9__	D_10__	D_11__	D_12__	D_13__	D_14__	0.802919
59e6a500d60807c1ac64b10f8b4efc9d	OTU_1059	D_0__Eukaryota															1
d18eea6cc747a3110862f10b30bbba84	OTU_1060	D_0__Eukaryota	D_1__SAR	D_2__Alveolata													0.993437
9d8ee9c7ee361073b0ced2079e2236a9	OTU_1061	D_0__Eukaryota	D_1__SAR	D_2__Alveolata	D_3__Protalveolata	D_4__Syndiniales	D_5__Syndiniales Group II	D_6__uncultured eukaryote	D_7__	D_8__	D_9__	D_10__	D_11__	D_12__	D_13__	D_14__	0.86359
d4aa9aae647e9f61e28e33fc19fbcb34	OTU_1062	D_0__Eukaryota	D_1__SAR	D_2__Alveolata	D_3__Protalveolata	D_4__Syndiniales	D_5__Syndiniales Group I	D_6__uncultured eukaryote	D_7__	D_8__	D_9__	D_10__	D_11__	D_12__	D_13__	D_14__	0.956309
eef33e7bfbc34bb0186251b4b37bde04	OTU_1063	D_0__Eukaryota	D_1__Opisthokonta														0.94305
9848abc773d83b309d682fc186e4a4ef	OTU_1064	D_0__Eukaryota															1
f7076d0e4cca41e26fe0f32ca66512d4	OTU_1065	D_0__Eukaryota															1
0ed86b0672f78ec9df3841690433b434	OTU_1066	D_0__Eukaryota	D_1__SAR	D_2__Stramenopiles	D_3__Ochrophyta	D_4__Chrysophyceae	D_5__uncultured	D_6__uncultured marine picoeukaryote	D_7__	D_8__	D_9__	D_10__	D_11__	D_12__	D_13__	D_14__	0.918068
450c49d4920ca0d459dfb0d7bb8879f6	OTU_1067	D_0__Eukaryota	D_1__Opisthokonta	D_2__Holozoa	D_3__Metazoa (Animalia)	D_4__Eumetazoa											0.809246
44c5d3236fe6da7bde2eb961709070ea	OTU_1068	D_0__Eukaryota															1
f854a57ffff4323b005bac99855c6fba	OTU_1069	D_0__Eukaryota	D_1__SAR	D_2__Stramenopiles	D_3__Labyrinthulomycetes	D_4__uncultured	D_5__Oblongichytrium sp. TN6	D_6__	D_7__	D_8__	D_9__	D_10__	D_11__	D_12__	D_13__	D_14__	0.843162
be1a847c5d0b775ce709a30525d8457f	OTU_1070	D_0__Eukaryota															1
2c77c7af23fd65b9677369c4c8e2b03a	OTU_1071	D_0__Eukaryota	D_1__SAR	D_2__Stramenopiles	D_3__Ochrophyta	D_4__Bolidomonas	D_5__Bolidomonas pacifica	D_6__	D_7__	D_8__	D_9__	D_10__	D_11__	D_12__	D_13__	D_14__	0.998353
211d90bd86a40f0923c4f09081dda732	OTU_1072	D_0__Eukaryota	D_1__SAR	D_2__Alveolata	D_3__Protalveolata	D_4__Syndiniales	D_5__Amoebophrya	D_6__Amoebophrya sp. ex Prorocentrum minimum	D_7__	D_8__	D_9__	D_10__	D_11__	D_12__	D_13__	D_14__	0.969885
d49582a444a473a9293736a0a2a22aa7	OTU_1073	D_0__Eukaryota	D_1__SAR	D_2__Alveolata	D_3__Dinoflagellata												0.836083
d376175c43664c9cdbe0b6d46a3e7601	OTU_1074	D_0__Eukaryota	D_1__SAR	D_2__Stramenopiles	D_3__Ochrophyta	D_4__Diatomea	D_5__Bacillariophytina										0.718302
8c4fdde9253a8e6b5798155c8f773afc	OTU_1075	D_0__Eukaryota	D_1__SAR	D_2__Stramenopiles	D_3__Ochrophyta	D_4__Diatomea	D_5__Bacillariophytina	D_6__Bacillariophyceae	D_7__Catenulaceae sp. 97	D_8__	D_9__	D_10__	D_11__	D_12__	D_13__	D_14__	0.904567
d7f71b8b984df01d765bbd1acf9cbf0d	OTU_1076	D_0__Eukaryota															1
f18ae287a85fa3c7381fa82b7f4f28dc	OTU_1077	D_0__Eukaryota															1
3d1fcf8406b55fea9963f6844be5a9df	OTU_1078	D_0__Eukaryota															1
a440a529c1c4d18a7abb0c9bf77fbb04	OTU_1079	D_0__Eukaryota	D_1__SAR	D_2__Alveolata	D_3__Dinoflagellata	D_4__Dinophyceae											0.71801
ae3a8558d7b23f54929a581626d46fab	OTU_1080	D_0__Eukaryota	D_1__Excavata	D_2__Discoba	D_3__Discicristata	D_4__Euglenozoa											0.843822
e93e4dccde3ab3c36a3f0ce0c935b950	OTU_1081	D_0__Eukaryota															1
1b73455746bacf2832dc3036de722aa2	OTU_1082	D_0__Eukaryota	D_1__Incertae Sedis	D_2__Telonema	D_3__uncultured eukaryote	D_4__	D_5__	D_6__	D_7__	D_8__	D_9__	D_10__	D_11__	D_12__	D_13__	D_14__	0.999823
ea30bc8658d8a4ae6e4cc13436213119	OTU_1083	D_0__Eukaryota	D_1__SAR	D_2__Stramenopiles	D_3__Bicosoecida	D_4__Pseudobodo	D_5__Pseudobodo tremulans	D_6__	D_7__	D_8__	D_9__	D_10__	D_11__	D_12__	D_13__	D_14__	0.929557
bacee42c67e25ce4c5feb5e9a08e7c8d	OTU_1084	D_0__Eukaryota	D_1__SAR	D_2__Stramenopiles	D_3__Ochrophyta	D_4__Chrysophyceae	D_5__Chromulinales	D_6__Poteriospumella	D_7__uncultured eukaryote	D_8__	D_9__	D_10__	D_11__	D_12__	D_13__	D_14__	0.997187
11d14eff7102fe26f0c11e5e4e131360	OTU_1085	D_0__Eukaryota	D_1__Haptophyta	D_2__Prymnesiophyceae	D_3__Prymnesiales												0.99778
79caf4b9599a9b76502dbcf6d3597f2e	OTU_1086	D_0__Eukaryota	D_1__Opisthokonta	D_2__Holozoa	D_3__Metazoa (Animalia)	D_4__Eumetazoa	D_5__Bilateria	D_6__Xenacoelomorpha	D_7__Acoelomorpha	D_8__Acoela	D_9__Atriofronta polyvacuola	D_10__	D_11__	D_12__	D_13__	D_14__	1
0d73b74cfd4aeea9fcebef15b51cae0f	OTU_1087	D_0__Eukaryota	D_1__Incertae Sedis	D_2__Telonema													1
9de3eb2279035e56577bceb3055bf4a5	OTU_1088	D_0__Eukaryota	D_1__SAR	D_2__Alveolata	D_3__Dinoflagellata	D_4__Dinophyceae											0.740867
06e8cca44e9c22987ceb2cb5578b3dc9	OTU_1089	D_0__Eukaryota	D_1__Opisthokonta	D_2__Nucletmycea	D_3__Fungi	D_4__Dikarya	D_5__Ascomycota	D_6__Saccharomycotina	D_7__Saccharomycetes	D_8__Saccharomycetales	D_9__Debaryomycetaceae						0.830462
91acd5c25377ab6b2a1f183d2feda24e	OTU_1090	D_0__Eukaryota	D_1__Opisthokonta	D_2__Holozoa	D_3__Metazoa (Animalia)	D_4__Porifera	D_5__Demospongiae	D_6__Dictyoceratida	D_7__Dysidea avara	D_8__	D_9__	D_10__	D_11__	D_12__	D_13__	D_14__	0.999998
831a64441179013e82f38c0cc819be58	OTU_1091	D_0__Eukaryota	D_1__SAR	D_2__Alveolata	D_3__Dinoflagellata	D_4__Dinophyceae	D_5__Peridiniphycidae	D_6__Peridiniales	D_7__Protoperidinium	D_8__uncultured marine eukaryote	D_9__	D_10__	D_11__	D_12__	D_13__	D_14__	0.996352
e9b4e56f5d2da0e848f85a4fcc76a3f2	OTU_1092	D_0__Eukaryota	D_1__Opisthokonta	D_2__Holozoa	D_3__Metazoa (Animalia)	D_4__Eumetazoa	D_5__Bilateria										0.943874
fb753bee3f16eb70f75ae61c899e2aef	OTU_1093	D_0__Eukaryota	D_1__SAR	D_2__Alveolata	D_3__Dinoflagellata	D_4__Dinophyceae	D_5__Peridiniphycidae	D_6__Peridiniales	D_7__Heterocapsa	D_8__uncultured eukaryote	D_9__	D_10__	D_11__	D_12__	D_13__	D_14__	0.947187
c94fc7ad595c17b67f8b0c4fd8e0689a	OTU_1094	D_0__Eukaryota	D_1__SAR	D_2__Stramenopiles	D_3__MAST-11	D_4__uncultured marine eukaryote	D_5__	D_6__	D_7__	D_8__	D_9__	D_10__	D_11__	D_12__	D_13__	D_14__	1
9d23798e19cd03003bb61ceedad137a7	OTU_1095	D_0__Eukaryota															1
25b324e67f4bb99d81c491baaa1ff112	OTU_1096	D_0__Eukaryota	D_1__Opisthokonta	D_2__Holozoa	D_3__Metazoa (Animalia)	D_4__Eumetazoa	D_5__Bilateria	D_6__Gastrotricha	D_7__Chaetonotida	D_8__Halichaetonotus schromi	D_9__	D_10__	D_11__	D_12__	D_13__	D_14__	0.999974
2bef9f5d75e21c1b39472d2c95a4af7c	OTU_1097	D_0__Eukaryota	D_1__SAR	D_2__Alveolata	D_3__Protalveolata	D_4__Syndiniales	D_5__uncultured Duboscquella	D_6__	D_7__	D_8__	D_9__	D_10__	D_11__	D_12__	D_13__	D_14__	0.994545
4d626f87662898692a303639fe648703	OTU_1098	D_0__Eukaryota	D_1__SAR	D_2__Stramenopiles	D_3__Ochrophyta	D_4__Diatomea	D_5__Coscinodiscophytina	D_6__Rhizosolenids	D_7__Rhizosolenia	D_8__Rhizosolenia similoides	D_9__	D_10__	D_11__	D_12__	D_13__	D_14__	0.999999
36ea7f1774de5a5f3f0b888250294454	OTU_1099	D_0__Eukaryota	D_1__SAR	D_2__Stramenopiles	D_3__Ochrophyta	D_4__Chrysophyceae											0.946511
07e07e234fc00859887b97c39c1047bd	OTU_1100	D_0__Eukaryota	D_1__Opisthokonta	D_2__Holozoa	D_3__Metazoa (Animalia)	D_4__Eumetazoa	D_5__Bilateria	D_6__Platyhelminthes	D_7__Rhabditophora	D_8__Seriata	D_9__Proseriata	D_10__Xenotoplana acus	D_11__	D_12__	D_13__	D_14__	0.999999
018666091db05d5d28e8882b65948338	OTU_1101	D_0__Eukaryota	D_1__SAR	D_2__Alveolata	D_3__Dinoflagellata	D_4__Dinophyceae											0.987298
409cb966a8c1ab5e334f715a9de5450f	OTU_1102	D_0__Eukaryota	D_1__SAR	D_2__Alveolata	D_3__Protalveolata	D_4__Syndiniales	D_5__Syndiniales Group II	D_6__uncultured eukaryote	D_7__	D_8__	D_9__	D_10__	D_11__	D_12__	D_13__	D_14__	0.944341
1f894c655cfe7f9efda04c88ffb8f8c1	OTU_1103	D_0__Eukaryota	D_1__SAR	D_2__Stramenopiles	D_3__MAST-7	D_4__MAST-7D	D_5__uncultured eukaryote	D_6__	D_7__	D_8__	D_9__	D_10__	D_11__	D_12__	D_13__	D_14__	0.998947
9766acb6c3480652c313bc6dce6378d9	OTU_1104	D_0__Eukaryota	D_1__Opisthokonta	D_2__Holozoa	D_3__Metazoa (Animalia)	D_4__Eumetazoa	D_5__Bilateria	D_6__Mollusca	D_7__Bivalvia	D_8__Pteriomorphia	D_9__Mytiloida						0.999878
ec1a8046801a284d67bfe963dab13cfa	OTU_1105	D_0__Eukaryota	D_1__Opisthokonta	D_2__Nucletmycea	D_3__Fungi	D_4__Dikarya	D_5__Basidiomycota	D_6__Agaricomycotina									0.995105
92170278ab4384bc4005f0b50a0912fd	OTU_1106	D_0__Eukaryota	D_1__Opisthokonta	D_2__Holozoa	D_3__Metazoa (Animalia)	D_4__Eumetazoa	D_5__Bilateria	D_6__Chordata	D_7__Tunicata	D_8__Ascidiacea	D_9__Enterogona	D_10__Ciona intestinalis	D_11__	D_12__	D_13__	D_14__	0.998303
e9631f20eef544ba497a32e3571ce157	OTU_1107	D_0__Eukaryota	D_1__Opisthokonta	D_2__Nucletmycea	D_3__Fungi	D_4__Dikarya	D_5__Basidiomycota	D_6__Agaricomycotina	D_7__Agaricomycetes								0.702454
663cafef91e56ab96bcc1c9a3a53af0f	OTU_1108	D_0__Eukaryota	D_1__Opisthokonta	D_2__Holozoa	D_3__Metazoa (Animalia)	D_4__Eumetazoa	D_5__Bilateria	D_6__Gastrotricha	D_7__Chaetonotida	D_8__Halichaetonotus schromi	D_9__	D_10__	D_11__	D_12__	D_13__	D_14__	0.819296
64dfc43860d602fcb3099085269e4b7d	OTU_1109	D_0__Eukaryota	D_1__SAR	D_2__Alveolata													0.953322
e2de91d4b99cac80c372a5623c374f77	OTU_1110	D_0__Eukaryota	D_1__SAR	D_2__Rhizaria	D_3__Retaria	D_4__Polycystinea	D_5__Nassellaria	D_6__Pseudocubus									0.999333
f5353b62d456608fe7d99445844bcfad	OTU_1111	D_0__Eukaryota															1
aa09b7d0a15b36ffa08f361853c6707c	OTU_1112	D_0__Eukaryota	D_1__SAR	D_2__Alveolata	D_3__Dinoflagellata	D_4__Dinophyceae	D_5__Gymnodiniphycidae										0.77538
025bf621825b8fc44c30c733fbb5988a	OTU_1113	D_0__Eukaryota	D_1__SAR	D_2__Rhizaria	D_3__Cercozoa	D_4__Vampyrellidae	D_5__uncultured	D_6__Thalassomyxa sp. MVa1x	D_7__	D_8__	D_9__	D_10__	D_11__	D_12__	D_13__	D_14__	0.997137
3196bbc8e911da9f1a2f62c2bcaff4da	OTU_1114	D_0__Eukaryota	D_1__SAR	D_2__Stramenopiles	D_3__Ochrophyta	D_4__Diatomea	D_5__Bacillariophytina	D_6__Bacillariophyceae									0.95401
3b066f9aeaaa4008a4541143b1d4a41f	OTU_1115	D_0__Eukaryota	D_1__Archaeplastida	D_2__Chloroplastida	D_3__Charophyta	D_4__Phragmoplastophyta	D_5__Streptophyta	D_6__Embryophyta	D_7__Tracheophyta	D_8__Spermatophyta	D_9__Magnoliophyta	D_10__Solanales	D_11__Nicotiana				0.965475
3fad2a74bc210c907d36f704687a6c59	OTU_1116	D_0__Eukaryota	D_1__SAR	D_2__Stramenopiles	D_3__Peronosporomycetes												0.932606
13bef8f048884da42be588276f45bfa2	OTU_1117	D_0__Eukaryota	D_1__SAR	D_2__Alveolata	D_3__Ciliophora	D_4__Intramacronucleata	D_5__Spirotrichea	D_6__Choreotrichia									0.971786
5206da664f4388564f95116d7ceeffd7	OTU_1118	D_0__Eukaryota	D_1__SAR	D_2__Alveolata	D_3__Dinoflagellata	D_4__Dinophyceae	D_5__Peridiniphycidae	D_6__Peridiniales	D_7__Protoperidinium	D_8__uncultured marine eukaryote	D_9__	D_10__	D_11__	D_12__	D_13__	D_14__	0.97434
8bd8d9df8cbb58379140140c6f3f7f1b	OTU_1119	D_0__Eukaryota	D_1__SAR	D_2__Stramenopiles													0.972218
1e4101a2cc5e813c830151e9c2c8810e	OTU_1120	D_0__Eukaryota															1
28b0d82f2c88a20bb8fd962444928c76	OTU_1121	D_0__Eukaryota	D_1__SAR	D_2__Stramenopiles													0.895237
5969968add1f9e800fc4848c3cd64dbd	OTU_1122	D_0__Eukaryota	D_1__Incertae Sedis	D_2__Telonema	D_3__uncultured eukaryote	D_4__	D_5__	D_6__	D_7__	D_8__	D_9__	D_10__	D_11__	D_12__	D_13__	D_14__	0.994908
65d4ce7aad4ebefde512cdd9a790c602	OTU_1123	D_0__Eukaryota	D_1__SAR	D_2__Stramenopiles	D_3__Ochrophyta	D_4__Diatomea	D_5__Bacillariophytina	D_6__Bacillariophyceae									0.767196
7adbb2f43e72b135db707b3515503c3c	OTU_1124	D_0__Eukaryota	D_1__Opisthokonta	D_2__Holozoa	D_3__Metazoa (Animalia)	D_4__Eumetazoa	D_5__Bilateria	D_6__Arthropoda	D_7__Crustacea	D_8__Maxillopoda	D_9__Copepoda	D_10__Harpacticoida					0.883529
cecab0d8cc3659a79a52c2854dec70aa	OTU_1125	D_0__Eukaryota															1
bec71617b2cadb02fb39a554bf03580d	OTU_1126	D_0__Eukaryota	D_1__SAR	D_2__Alveolata													0.950982
16932c249c53009650329c52a3a45627	OTU_1127	D_0__Eukaryota	D_1__SAR	D_2__Alveolata	D_3__Ciliophora	D_4__Intramacronucleata	D_5__Spirotrichea	D_6__Oxytrichidae	D_7__uncultured Eimeriidae	D_8__	D_9__	D_10__	D_11__	D_12__	D_13__	D_14__	0.895057
34e10c2f5029ba739003a5790eda42bc	OTU_1128	D_0__Eukaryota	D_1__Archaeplastida	D_2__Rhodophyceae	D_3__Florideophycidae	D_4__Corallinophycidae	D_5__Neogoniolithon	D_6__uncultured Corallinales	D_7__	D_8__	D_9__	D_10__	D_11__	D_12__	D_13__	D_14__	0.999977
b64a858ab13b09d03b0d33c06b071fa1	OTU_1129	D_0__Eukaryota	D_1__Opisthokonta	D_2__Holozoa	D_3__Metazoa (Animalia)	D_4__Eumetazoa	D_5__Bilateria	D_6__Arthropoda	D_7__Crustacea	D_8__Malacostraca	D_9__Eumalacostraca						0.999365
396fd4ad4efdb4dfedfc0c3e0ba4c528	OTU_1130	D_0__Eukaryota	D_1__SAR	D_2__Stramenopiles	D_3__Ochrophyta	D_4__Diatomea	D_5__Bacillariophytina										0.831894
49139fefa6dd8ff05c25f3c05248becf	OTU_1131	D_0__Eukaryota	D_1__Opisthokonta	D_2__Holozoa	D_3__Metazoa (Animalia)	D_4__Eumetazoa											0.889252
6cd7d0f29e06c9e5126cc44753238f0d	OTU_1132	D_0__Eukaryota															1
4844f07b57ee99fbcb2878a939db6999	OTU_1133	D_0__Eukaryota	D_1__SAR	D_2__Stramenopiles													0.966397
798a66797c8af7eb5185e74697b9b4d9	OTU_1134	D_0__Eukaryota	D_1__Opisthokonta	D_2__Holozoa	D_3__Metazoa (Animalia)	D_4__Eumetazoa	D_5__Bilateria	D_6__Arthropoda	D_7__Crustacea	D_8__Maxillopoda	D_9__Copepoda	D_10__Cyclopoida	D_11__Xarifia sp. New Caledonia-RJH-2004	D_12__	D_13__	D_14__	0.999953
2fbde2bcc8d4a5639bfd17505e44874e	OTU_1135	D_0__Eukaryota															1
6d9271fcb53713bfc89aca885d53ba69	OTU_1136	D_0__Eukaryota															1
f856c7808180ddfbc6a4069cd493a70e	OTU_1137	D_0__Eukaryota	D_1__SAR	D_2__Alveolata													0.946135
fb542a5d96b4f37d43dcf08c8cd3a26d	OTU_1138	D_0__Eukaryota	D_1__Opisthokonta														0.72353
07793941b668dbfe9c576296eb8458f3	OTU_1139	D_0__Eukaryota															1
b8d8ef502008971086fd9c07e75c1787	OTU_1140	D_0__Eukaryota	D_1__Archaeplastida	D_2__Chloroplastida	D_3__Charophyta	D_4__Phragmoplastophyta	D_5__Streptophyta	D_6__Embryophyta	D_7__Tracheophyta	D_8__Spermatophyta	D_9__Magnoliophyta	D_10__Liliopsida	D_11__Poales				0.957362
a00069149ed1c3ac7e5433875642b33c	OTU_1141	D_0__Eukaryota	D_1__Opisthokonta	D_2__Holozoa	D_3__Metazoa (Animalia)	D_4__Eumetazoa	D_5__Bilateria	D_6__Chordata	D_7__Tunicata	D_8__Appendicularia	D_9__Copelata	D_10__Oikopleuridae	D_11__uncultured eukaryote	D_12__	D_13__	D_14__	0.983798
4176e30ec0a1b69b5711d156778d337a	OTU_1142	D_0__Eukaryota	D_1__Opisthokonta	D_2__Holozoa	D_3__Metazoa (Animalia)	D_4__Eumetazoa	D_5__Bilateria	D_6__Xenacoelomorpha	D_7__Acoelomorpha	D_8__Acoela	D_9__Atriofronta polyvacuola	D_10__	D_11__	D_12__	D_13__	D_14__	1
7e3bc8f25cf68c7669435407af0c1c0c	OTU_1143	D_0__Eukaryota															1
d9876c0832ce7ec79de4f629d04169f7	OTU_1144	D_0__Eukaryota	D_1__Opisthokonta	D_2__Holozoa	D_3__Metazoa (Animalia)	D_4__Eumetazoa	D_5__Bilateria	D_6__Arthropoda	D_7__Crustacea	D_8__Maxillopoda	D_9__Copepoda	D_10__Cyclopoida					0.775253
ba78d9172c03d8970bb68dfe3a4d4bce	OTU_1145	D_0__Eukaryota	D_1__Opisthokonta														0.736395
33c2a5db319f3294e765725493385d25	OTU_1146	D_0__Eukaryota	D_1__Opisthokonta	D_2__Holozoa	D_3__Metazoa (Animalia)	D_4__Eumetazoa	D_5__Bilateria	D_6__Annelida	D_7__Polychaeta	D_8__Scolecida	D_9__Terebellida	D_10__Lanice conchilega	D_11__	D_12__	D_13__	D_14__	0.994656
e60cef71882df26cab03b68c422287cd	OTU_1147	D_0__Eukaryota	D_1__Opisthokonta	D_2__Holozoa	D_3__Metazoa (Animalia)	D_4__Eumetazoa	D_5__Bilateria	D_6__Mollusca	D_7__Bivalvia	D_8__Pteriomorphia	D_9__Mytiloida						0.999073
71c53ecdfd395a0bb6fffe790c109616	OTU_1148	D_0__Eukaryota	D_1__Cryptophyceae	D_2__uncultured	D_3__uncultured eukaryote	D_4__	D_5__	D_6__	D_7__	D_8__	D_9__	D_10__	D_11__	D_12__	D_13__	D_14__	0.999976
57b443088f10613a15a83d9cf1ec713d	OTU_1149	D_0__Eukaryota	D_1__Cryptophyceae	D_2__Kathablepharidae	D_3__Leucocryptos	D_4__uncultured eukaryote	D_5__	D_6__	D_7__	D_8__	D_9__	D_10__	D_11__	D_12__	D_13__	D_14__	0.909508
d2194c1a98918c2ccfa9b726f08d7ca5	OTU_1150	D_0__Eukaryota	D_1__Opisthokonta	D_2__Holozoa	D_3__Metazoa (Animalia)	D_4__Eumetazoa	D_5__Bilateria	D_6__Annelida	D_7__Polychaeta	D_8__Palpata	D_9__Phyllodocida	D_10__Eteone longa	D_11__	D_12__	D_13__	D_14__	0.845319
5b509ffcd93ba493b6ff5a65ec79cce6	OTU_1151	D_0__Eukaryota	D_1__SAR	D_2__Stramenopiles	D_3__Ochrophyta	D_4__Diatomea	D_5__Bacillariophytina										0.762702
b5d9c206dce876f3d656ee195aee331c	OTU_1152	D_0__Eukaryota	D_1__Archaeplastida	D_2__Chloroplastida	D_3__Chlorophyta	D_4__Mamiellophyceae											0.999994
d683176b35a2e74fdb3002654ee4e3ac	OTU_1153	D_0__Eukaryota															1
e20681013852270d56cf98f2d6f0f43e	OTU_1154	D_0__Eukaryota	D_1__SAR	D_2__Alveolata	D_3__Dinoflagellata												0.83261
59336beba508674ab5e0a4edaecc1e06	OTU_1155	D_0__Eukaryota															1
3db76a9f86e0d8741f82f7b3950e0907	OTU_1156	D_0__Eukaryota	D_1__Opisthokonta	D_2__Holozoa	D_3__Metazoa (Animalia)	D_4__Eumetazoa											0.822487
bbc8c32db6c00be76c5603118aa89163	OTU_1157	D_0__Eukaryota	D_1__Opisthokonta	D_2__Nucletmycea	D_3__Fungi	D_4__Dikarya	D_5__Basidiomycota	D_6__Agaricomycotina	D_7__Agaricomycetes								0.989249
30d5ebc827a3e03f7d4b88461d9aec87	OTU_1158	D_0__Eukaryota	D_1__SAR	D_2__Alveolata	D_3__Dinoflagellata	D_4__uncultured	D_5__uncultured eukaryote	D_6__	D_7__	D_8__	D_9__	D_10__	D_11__	D_12__	D_13__	D_14__	0.992871
42e3e2bb3b78b3cf4924a2b931011cdc	OTU_1159	D_0__Eukaryota	D_1__Opisthokonta	D_2__Holozoa	D_3__Metazoa (Animalia)	D_4__Eumetazoa											0.865142
e232e74c9aabadb2b7050011b9d55d30	OTU_1160	D_0__Eukaryota	D_1__Opisthokonta	D_2__Holozoa	D_3__Metazoa (Animalia)	D_4__Eumetazoa	D_5__Bilateria	D_6__Annelida	D_7__uncultured metazoan	D_8__	D_9__	D_10__	D_11__	D_12__	D_13__	D_14__	0.917204
b1056d2c1c0b09c2d9433de056e3a1fa	OTU_1161	D_0__Eukaryota	D_1__SAR	D_2__Stramenopiles	D_3__Ochrophyta	D_4__Diatomea											0.972934
ae80e749e03fdf8910b4c4f88e01b138	OTU_1162	D_0__Eukaryota	D_1__Opisthokonta	D_2__Holozoa	D_3__Metazoa (Animalia)	D_4__Eumetazoa	D_5__Cnidaria	D_6__Hydrozoa	D_7__Hydroidolina	D_8__Anthoathecata	D_9__Millepora alcicornis	D_10__	D_11__	D_12__	D_13__	D_14__	0.996515
f387704ad73d279fd5695550d4e2e5f1	OTU_1163	D_0__Eukaryota	D_1__Opisthokonta	D_2__Holozoa	D_3__Metazoa (Animalia)	D_4__Eumetazoa	D_5__Bilateria										0.936873
9284327c518ad8e09845b444b4225aa1	OTU_1164	D_0__Eukaryota	D_1__SAR	D_2__Alveolata													0.952323
76a65bdf49eeb543d9d2f6135c7039ce	OTU_1165	D_0__Eukaryota	D_1__SAR	D_2__Stramenopiles	D_3__Ochrophyta	D_4__Diatomea	D_5__Bacillariophytina	D_6__Mediophyceae									0.790564
1e3f8df29f949a07eec70ca0824b7d89	OTU_1166	D_0__Eukaryota															1
080dca07267e15a5c9e6da463d28141a	OTU_1167	D_0__Eukaryota	D_1__Opisthokonta	D_2__Holozoa	D_3__Metazoa (Animalia)	D_4__Eumetazoa	D_5__Bilateria	D_6__Xenacoelomorpha	D_7__Acoelomorpha	D_8__Acoela							0.977129
65e7fb206b27f6e234c1f2b736a40cde	OTU_1168	D_0__Eukaryota	D_1__SAR	D_2__Stramenopiles													0.978147
c9e044574708be262d893da5c5e73447	OTU_1169	D_0__Eukaryota	D_1__SAR	D_2__Alveolata													0.98596
576f88623a29d404805875faa2710ba3	OTU_1170	D_0__Eukaryota	D_1__Excavata	D_2__Discoba	D_3__Discicristata	D_4__Euglenozoa	D_5__Kinetoplastea	D_6__Metakinetoplastina	D_7__Neobodonida	D_8__Neobodo	D_9__uncultured eukaryote	D_10__	D_11__	D_12__	D_13__	D_14__	0.999515
3587520006e09bcea6487725aa74b726	OTU_1171	D_0__Eukaryota															1
5969a1090727a8a6b00a5b9ac1635958	OTU_1172	D_0__Eukaryota	D_1__SAR	D_2__Stramenopiles	D_3__Ochrophyta	D_4__Chrysophyceae											0.96569
a349b78dc1553d7ac3724a94eacbd2ea	OTU_1173	D_0__Eukaryota	D_1__Opisthokonta	D_2__Holozoa	D_3__Metazoa (Animalia)	D_4__Eumetazoa	D_5__Bilateria	D_6__Mollusca	D_7__Bivalvia	D_8__Heteroconchia	D_9__Veneroida	D_10__Spisula solidissima (Atlantic surf clam)	D_11__	D_12__	D_13__	D_14__	0.995712
fd0fc545829cab89340636abc435f54f	OTU_1174	D_0__Eukaryota	D_1__Opisthokonta	D_2__Nucletmycea	D_3__Fungi	D_4__Dikarya	D_5__Basidiomycota	D_6__Agaricomycotina	D_7__Agaricomycetes	D_8__Agaricales							0.83568
d2b1ed53039c18002d266e7685bb0c2a	OTU_1175	D_0__Eukaryota	D_1__SAR	D_2__Alveolata	D_3__Ciliophora	D_4__Intramacronucleata	D_5__Conthreep	D_6__Phyllopharyngea	D_7__Cyrtophoria	D_8__Paracyrtophoron	D_9__Paracyrtophoron tropicum	D_10__	D_11__	D_12__	D_13__	D_14__	0.99986
32aed221a6e9a05785cca83e10128312	OTU_1176	D_0__Eukaryota	D_1__Opisthokonta	D_2__Holozoa	D_3__Metazoa (Animalia)	D_4__Eumetazoa	D_5__Bilateria										0.71906
57b91ef6a8fab03b6ad59a04525dd7c8	OTU_1177	D_0__Eukaryota	D_1__SAR	D_2__Alveolata	D_3__Dinoflagellata	D_4__Dinophyceae	D_5__uncultured	D_6__uncultured eukaryote	D_7__	D_8__	D_9__	D_10__	D_11__	D_12__	D_13__	D_14__	0.753891
bd665de4e7ed292a9229763d05257c54	OTU_1178	D_0__Eukaryota	D_1__Excavata	D_2__Discoba	D_3__Discicristata	D_4__Euglenozoa											0.885596
de75eb3398c95d4528617f9e9a8b7c84	OTU_1179	D_0__Eukaryota	D_1__Opisthokonta	D_2__Holozoa	D_3__Metazoa (Animalia)	D_4__Eumetazoa	D_5__Bilateria	D_6__Annelida	D_7__Polychaeta	D_8__Palpata	D_9__Eunicida	D_10__Parougia bermudensis	D_11__	D_12__	D_13__	D_14__	0.873606
07309a15531c2f8b795fefa79b2eae71	OTU_1180	D_0__Eukaryota	D_1__Opisthokonta														0.725533
a01b8d0b98ac70e944d202b1bf278d98	OTU_1181	D_0__Eukaryota															1
8f94f8ef4a91cb9d123c7db58d6e0535	OTU_1182	D_0__Eukaryota	D_1__Opisthokonta	D_2__Holozoa	D_3__Metazoa (Animalia)	D_4__Porifera	D_5__Demospongiae	D_6__Suberitida	D_7__Terpios aploos	D_8__	D_9__	D_10__	D_11__	D_12__	D_13__	D_14__	0.981332
1d1ffdc18aa9fc15f225072f9582dd5f	OTU_1183	D_0__Eukaryota															1
632d7beacbcc6a117b86fa92463cd6f7	OTU_1184	D_0__Eukaryota	D_1__Excavata	D_2__Discoba	D_3__Discicristata	D_4__Euglenozoa	D_5__Kinetoplastea	D_6__Metakinetoplastina	D_7__Neobodonida	D_8__Rhynchobodo	D_9__uncultured eukaryote	D_10__	D_11__	D_12__	D_13__	D_14__	0.889358
ea3e6a18777fe496fd016b93b301463c	OTU_1185	D_0__Eukaryota	D_1__SAR	D_2__Alveolata	D_3__Ciliophora	D_4__Intramacronucleata	D_5__Spirotrichea	D_6__Oligotrichia	D_7__Pseudotontonia	D_8__uncultured eukaryote	D_9__	D_10__	D_11__	D_12__	D_13__	D_14__	0.721063
d501c6473e91d50912549edcaab0b98d	OTU_1186	D_0__Eukaryota	D_1__Opisthokonta	D_2__Holozoa	D_3__Metazoa (Animalia)	D_4__Eumetazoa	D_5__Bilateria										0.790828
e1b176fb479b4bc7e717f4ec7c8577d4	OTU_1187	D_0__Eukaryota															1
4be98159142bc34a286feb794b9b4b95	OTU_1188	D_0__Eukaryota	D_1__SAR	D_2__Alveolata	D_3__Dinoflagellata	D_4__Dinophyceae	D_5__Peridiniphycidae	D_6__Gonyaulacales	D_7__Gonyaulax	D_8__Gonyaulax polygramma	D_9__	D_10__	D_11__	D_12__	D_13__	D_14__	1
0d565f98ffd905e4d54c46044e5a692c	OTU_1189	D_0__Eukaryota	D_1__SAR	D_2__Stramenopiles	D_3__Ochrophyta	D_4__Chrysophyceae	D_5__uncultured	D_6__uncultured marine picoeukaryote	D_7__	D_8__	D_9__	D_10__	D_11__	D_12__	D_13__	D_14__	0.953922
08d486edfa0b0c49dae43b75468dd5d0	OTU_1190	D_0__Eukaryota	D_1__Haptophyta	D_2__Prymnesiophyceae	D_3__Prymnesiales												0.75563
609cde0132c1969c2f248d342245ba9d	OTU_1191	D_0__Eukaryota	D_1__Opisthokonta	D_2__Holozoa	D_3__Metazoa (Animalia)	D_4__Eumetazoa	D_5__Bilateria	D_6__Arthropoda									0.975264
f02aa20ca9cc6168645bebaa65e4fe95	OTU_1192	D_0__Eukaryota	D_1__SAR	D_2__Stramenopiles	D_3__Ochrophyta	D_4__Diatomea	D_5__Bacillariophytina										0.734202
40fd329384f6ffa37e366aa43ec052a5	OTU_1193	D_0__Eukaryota	D_1__SAR	D_2__Alveolata	D_3__Dinoflagellata	D_4__Dinophyceae											0.797701
f78325c8fccce7cafe2b7862ded42063	OTU_1194	D_0__Eukaryota	D_1__SAR	D_2__Rhizaria	D_3__Cercozoa	D_4__Novel Clade 2											0.851041
30c8835e74e9acc639246e4efad56517	OTU_1195	D_0__Eukaryota	D_1__SAR	D_2__Stramenopiles	D_3__Labyrinthulomycetes	D_4__Thraustochytriaceae	D_5__Thraustochytrium	D_6__Thraustochytrium sp. HK10	D_7__	D_8__	D_9__	D_10__	D_11__	D_12__	D_13__	D_14__	0.982812
02bb499b524a5b0bfcf742f176d50617	OTU_1196	D_0__Eukaryota	D_1__SAR	D_2__Stramenopiles	D_3__Ochrophyta	D_4__Diatomea	D_5__Bacillariophytina	D_6__Bacillariophyceae	D_7__Navicula	D_8__uncultured stramenopile	D_9__	D_10__	D_11__	D_12__	D_13__	D_14__	0.703216
5997d542e04521236e4370b529ca5e91	OTU_1197	D_0__Eukaryota	D_1__SAR	D_2__Stramenopiles	D_3__Ochrophyta	D_4__Diatomea	D_5__Bacillariophytina	D_6__Bacillariophyceae	D_7__uncultured marine eukaryote	D_8__	D_9__	D_10__	D_11__	D_12__	D_13__	D_14__	0.746659
402acc135f672cc85059070a28c4f0dd	OTU_1198	D_0__Eukaryota	D_1__SAR	D_2__Alveolata	D_3__Dinoflagellata	D_4__Dinophyceae	D_5__Gymnodiniphycidae	D_6__Gymnodinium clade	D_7__Paragymnodinium	D_8__Paragymnodinium shiwhaense	D_9__	D_10__	D_11__	D_12__	D_13__	D_14__	0.997055
2c574ff23779c0f5733cac4fabd77eee	OTU_1199	D_0__Eukaryota	D_1__SAR	D_2__Alveolata													0.97103
eac77e5324fb55ee6fdb5c0e50f0175f	OTU_1200	D_0__Eukaryota	D_1__SAR	D_2__Alveolata	D_3__Protalveolata	D_4__Syndiniales	D_5__Syndiniales Group I	D_6__uncultured Duboscquella	D_7__	D_8__	D_9__	D_10__	D_11__	D_12__	D_13__	D_14__	0.999941
00d89f19f27ca17b90712e538f610c8b	OTU_1201	D_0__Eukaryota															1
7e3841bf805e9e7b5aac0591cc67f52f	OTU_1202	D_0__Eukaryota	D_1__SAR	D_2__Stramenopiles	D_3__Ochrophyta	D_4__Diatomea	D_5__Bacillariophytina	D_6__Bacillariophyceae									0.790185
2df8002e4d26f8482a43894106da94bd	OTU_1203	D_0__Eukaryota															1
876def7df79d14d855eb3fc18ba7015c	OTU_1204	D_0__Eukaryota	D_1__SAR	D_2__Stramenopiles	D_3__Ochrophyta	D_4__Diatomea	D_5__Bacillariophytina	D_6__Bacillariophyceae									0.999614
6cbf9684e4dc8ffd7850a146165acbba	OTU_1205	D_0__Eukaryota	D_1__Opisthokonta	D_2__Holozoa	D_3__Metazoa (Animalia)	D_4__Eumetazoa	D_5__Bilateria										0.856426
3644aa5f93e3a20d8dff4ebc60a97080	OTU_1206	D_0__Eukaryota	D_1__SAR	D_2__Alveolata	D_3__Dinoflagellata	D_4__Dinophyceae	D_5__Gymnodiniphycidae	D_6__Gymnodinium clade	D_7__Paragymnodinium	D_8__uncultured eukaryote	D_9__	D_10__	D_11__	D_12__	D_13__	D_14__	0.999998
1997ffcbd6beb0f70596d35c83fc58fe	OTU_1207	D_0__Eukaryota															1
d4ae1886d3dcbb1babc3508931602476	OTU_1208	D_0__Eukaryota	D_1__SAR	D_2__Stramenopiles													0.963569
c6e1fd01617385f4805926d3ab90d60a	OTU_1209	D_0__Eukaryota	D_1__Opisthokonta	D_2__Holozoa	D_3__Metazoa (Animalia)	D_4__Porifera	D_5__Demospongiae	D_6__Poecilosclerida	D_7__Mycale fibrexilis	D_8__	D_9__	D_10__	D_11__	D_12__	D_13__	D_14__	0.999967
5ba6ba7ca176f1d7f681305daa37f620	OTU_1210	D_0__Eukaryota															1
85fbe5f2d92da3d79c89314d7e48f8fa	OTU_1211	D_0__Eukaryota															1
8faa0148d44dcdb51be721cb015a1937	OTU_1212	D_0__Eukaryota	D_1__Opisthokonta	D_2__Holozoa	D_3__Metazoa (Animalia)	D_4__Eumetazoa	D_5__Cnidaria	D_6__Hydrozoa	D_7__Trachylinae	D_8__Trachymedusae	D_9__uncultured metazoan	D_10__	D_11__	D_12__	D_13__	D_14__	0.966731
384e0dcd0059c4d5c1dad1d1e3f793bf	OTU_1213	D_0__Eukaryota	D_1__Opisthokonta	D_2__Holozoa	D_3__Metazoa (Animalia)	D_4__Eumetazoa	D_5__Bilateria										0.725101
83dd828a0f15e23e0702f8b583ea5148	OTU_1214	D_0__Eukaryota	D_1__Opisthokonta	D_2__Holozoa	D_3__Metazoa (Animalia)	D_4__Eumetazoa	D_5__Bilateria	D_6__Arthropoda									0.921677
97e2db163323698d66db6b768e7d94b7	OTU_1215	D_0__Eukaryota	D_1__Opisthokonta	D_2__Nucletmycea	D_3__Fungi	D_4__Dikarya	D_5__Ascomycota	D_6__Pezizomycotina	D_7__Eurotiomycetes	D_8__Eurotiales	D_9__Aspergillaceae	D_10__Aspergillus	D_11__Aspergillus penicillioides	D_12__	D_13__	D_14__	0.990979
309054d30fc8a017bc54815a26d25b01	OTU_1216	D_0__Eukaryota	D_1__SAR	D_2__Alveolata	D_3__Dinoflagellata	D_4__Dinophyceae	D_5__Peridiniphycidae	D_6__Peridiniales	D_7__uncultured	D_8__uncultured eukaryote	D_9__	D_10__	D_11__	D_12__	D_13__	D_14__	0.992188
b74cba4d83964e7a15dee9312a81ce23	OTU_1217	D_0__Eukaryota	D_1__SAR	D_2__Rhizaria	D_3__Retaria	D_4__Foraminifera	D_5__Globothalamea	D_6__Rotaliida									1
9979d6cccb404941fe1eacb3e3e2b37d	OTU_1218	D_0__Eukaryota	D_1__SAR	D_2__Rhizaria	D_3__Retaria	D_4__Acantharia											0.960861
64628fbcb85bf13730b53102d9c53513	OTU_1219	D_0__Eukaryota	D_1__Opisthokonta	D_2__Nucletmycea	D_3__Fungi	D_4__Dikarya	D_5__Basidiomycota	D_6__Agaricomycotina									0.988802
c4651a1c8c97cf2588d4baeca00d665b	OTU_1220	D_0__Eukaryota	D_1__SAR	D_2__Alveolata													0.933624
e52d53d782bb3c258fccaab7ee3a20db	OTU_1221	D_0__Eukaryota	D_1__SAR	D_2__Alveolata	D_3__Dinoflagellata	D_4__Dinophyceae	D_5__Gymnodiniphycidae	D_6__Gymnodinium clade	D_7__Erythropsidinium	D_8__Warnowia sp. BSL-2009a	D_9__	D_10__	D_11__	D_12__	D_13__	D_14__	0.967401
cb36f6d979e1b47cb8921c0cb4dd6389	OTU_1222	D_0__Eukaryota															1
d9b882ac8363deaea27ad15015b256b7	OTU_1223	D_0__Eukaryota	D_1__SAR	D_2__Alveolata													0.981815
90f53873ce927e87854e98e5520e299c	OTU_1224	D_0__Eukaryota															1
e6422dc65231deca49918615cdd0a1ac	OTU_1225	D_0__Eukaryota	D_1__Opisthokonta	D_2__Holozoa	D_3__Metazoa (Animalia)	D_4__Eumetazoa	D_5__Bilateria										0.99178
31b3589951f8cc236a218b053a655859	OTU_1226	D_0__Eukaryota	D_1__Opisthokonta														0.725178
5bb1f8c90c2556e7d638a33006a7c717	OTU_1227	D_0__Eukaryota	D_1__Opisthokonta	D_2__Nucletmycea	D_3__Fungi	D_4__Dikarya	D_5__Basidiomycota	D_6__Ustilaginomycotina	D_7__Ustilaginomycetes	D_8__Ustilaginales	D_9__Ustilaginaceae	D_10__Melanopsichium	D_11__uncultured eukaryote	D_12__	D_13__	D_14__	0.810679
9a8e2789fbdb15dfc76e68142cffee3d	OTU_1228	D_0__Eukaryota	D_1__Opisthokonta	D_2__Holozoa	D_3__Metazoa (Animalia)	D_4__Eumetazoa	D_5__Bilateria	D_6__Arthropoda	D_7__Crustacea	D_8__Maxillopoda	D_9__Copepoda						0.996291
75ff973ae4c8d57e4a55aa5346bd57eb	OTU_1229	D_0__Eukaryota	D_1__Opisthokonta	D_2__Holozoa	D_3__Metazoa (Animalia)	D_4__Eumetazoa	D_5__Bilateria										0.844633
548eeea4b79bb66fb6f521ab1a3824ee	OTU_1230	D_0__Eukaryota	D_1__SAR	D_2__Stramenopiles	D_3__Ochrophyta	D_4__Diatomea	D_5__Bacillariophytina	D_6__Mediophyceae									0.98848
79068bb146cd9c637a818c255bcd9b9b	OTU_1231	D_0__Eukaryota	D_1__SAR	D_2__Alveolata													0.996524
bd453af7c735aae02daff50c51bc4440	OTU_1232	D_0__Eukaryota															1
7beae1a4a6ae524d9020b290da512d50	OTU_1233	D_0__Eukaryota	D_1__SAR	D_2__Stramenopiles	D_3__Ochrophyta	D_4__Diatomea	D_5__Coscinodiscophytina	D_6__Fragilariales									0.710529
7ae9ea595c362741de4c7d78c46b7c54	OTU_1234	D_0__Eukaryota															1
75a4ac5a362a9f55757dbdbb86765506	OTU_1235	D_0__Eukaryota															1
15f392fc752a8c94bec6a3c86bf167e7	OTU_1236	D_0__Eukaryota	D_1__SAR	D_2__Alveolata	D_3__Protalveolata	D_4__Syndiniales	D_5__Duboscquella	D_6__uncultured eukaryote	D_7__	D_8__	D_9__	D_10__	D_11__	D_12__	D_13__	D_14__	0.99769
6f37a0506a3560601867ea4f41e156e7	OTU_1237	D_0__Eukaryota	D_1__Opisthokonta	D_2__Nucletmycea	D_3__Fungi	D_4__Dikarya	D_5__Basidiomycota	D_6__Ustilaginomycotina	D_7__Malasseziomycetes	D_8__Malasseziales	D_9__Malasseziaceae	D_10__Malassezia	D_11__Malassezia japonica	D_12__	D_13__	D_14__	0.999942
cc1985283e4c9b95afc21daa2e5c742f	OTU_1238	D_0__Eukaryota	D_1__SAR	D_2__Rhizaria	D_3__Retaria	D_4__RAD B	D_5__uncultured marine Polycystinea	D_6__	D_7__	D_8__	D_9__	D_10__	D_11__	D_12__	D_13__	D_14__	0.988204
61e61fa12b7145a3d6c783c172be9e7b	OTU_1239	D_0__Eukaryota	D_1__Opisthokonta	D_2__Holozoa	D_3__Metazoa (Animalia)	D_4__Eumetazoa	D_5__Bilateria										0.879911
ac6db29f2ac3cc2d2b3fedb59be5cbc6	OTU_1240	D_0__Eukaryota	D_1__SAR	D_2__Alveolata													0.97304
1b9c63bfd087a4c8c2d941c2e5535571	OTU_1241	D_0__Eukaryota	D_1__SAR	D_2__Stramenopiles	D_3__Ochrophyta	D_4__Chrysophyceae	D_5__Ochromonadales										0.721133
298c4b20f32285dc2f4fa9a3bb4e9557	OTU_1242	D_0__Eukaryota	D_1__SAR	D_2__Alveolata	D_3__Protalveolata	D_4__Syndiniales	D_5__Syndiniales Group II	D_6__uncultured alveolate	D_7__	D_8__	D_9__	D_10__	D_11__	D_12__	D_13__	D_14__	0.999981
4a9792142d99d1ce1a611a5c7d315913	OTU_1243	D_0__Eukaryota															1
2427d3db2466a58d10075fd459b8f418	OTU_1244	D_0__Eukaryota	D_1__Opisthokonta	D_2__Holozoa	D_3__Metazoa (Animalia)	D_4__Eumetazoa	D_5__Bilateria	D_6__Annelida	D_7__Polychaeta	D_8__Scolecida	D_9__Spionida	D_10__Chaetopterus cf. luteus KJO-2005	D_11__	D_12__	D_13__	D_14__	0.996799
76682dbcc3cd535d903cea1db857b9ce	OTU_1245	D_0__Eukaryota	D_1__SAR	D_2__Rhizaria	D_3__Retaria	D_4__Foraminifera	D_5__Globothalamea	D_6__Rotaliida									1
6e1b7af24d5062f982fa9b042c6000fa	OTU_1246	D_0__Eukaryota	D_1__Opisthokonta	D_2__Holozoa	D_3__Metazoa (Animalia)	D_4__Eumetazoa											0.822258
53507fe54ebc178c0b15fb0822c39e7c	OTU_1247	D_0__Eukaryota															1
ffce8cb4f2224fe0f243eccef72854a4	OTU_1248	D_0__Eukaryota															1
69bf1d2a073f382283d9ad5540fc08e1	OTU_1249	D_0__Eukaryota	D_1__Opisthokonta	D_2__Holozoa	D_3__Metazoa (Animalia)	D_4__Eumetazoa	D_5__Bilateria	D_6__Mollusca	D_7__Bivalvia	D_8__Pteriomorphia	D_9__Mytiloida						0.998776
3446a11b4cb7bdca463ec854c99be577	OTU_1250	D_0__Eukaryota	D_1__Opisthokonta	D_2__Holozoa	D_3__Metazoa (Animalia)	D_4__Eumetazoa	D_5__Bilateria	D_6__Arthropoda	D_7__Crustacea	D_8__Maxillopoda	D_9__Copepoda	D_10__Cyclopoida					0.764088
088aa3e558df4c1ac1d338ef1106eda1	OTU_1251	D_0__Eukaryota	D_1__SAR	D_2__Alveolata	D_3__Dinoflagellata	D_4__Dinophyceae											0.751967
aaf89a0d20bc3d5352068d015ebf4ee8	OTU_1252	D_0__Eukaryota	D_1__SAR	D_2__Alveolata													0.956368
f1ada5d4ca096be243c8007a702f7dcb	OTU_1253	D_0__Eukaryota	D_1__SAR	D_2__Alveolata	D_3__Ciliophora	D_4__Intramacronucleata	D_5__Litostomatea	D_6__Mesodiniidae	D_7__Myrionecta	D_8__uncultured eukaryote	D_9__	D_10__	D_11__	D_12__	D_13__	D_14__	0.998317
09f28622e430093ae72a36e869579de1	OTU_1254	D_0__Eukaryota	D_1__SAR	D_2__Alveolata	D_3__Apicomplexa												0.852141
e837be2a181c5653b5ed10b4fe254860	OTU_1255	D_0__Eukaryota	D_1__Opisthokonta	D_2__Holozoa	D_3__Metazoa (Animalia)	D_4__Eumetazoa	D_5__Bilateria										0.849027
5a7c312465c774f80a092cbd7a6b4f08	OTU_1256	D_0__Eukaryota	D_1__Opisthokonta														0.726415
0d575eb97dd59aee724a1ea73f3069d2	OTU_1257	D_0__Eukaryota															1
99c17d0a2d19a9bc95d5339da268eb5f	OTU_1258	D_0__Eukaryota	D_1__SAR	D_2__Alveolata	D_3__Dinoflagellata	D_4__Dinophyceae	D_5__Gymnodiniphycidae	D_6__Suessiaceae									0.999991
35c4c1192422a5f1efb695c553e8a6b1	OTU_1259	D_0__Eukaryota	D_1__SAR	D_2__Alveolata													0.98863
7662ea7b94047c01ab6aac9c31ad8bec	OTU_1260	D_0__Eukaryota	D_1__SAR	D_2__Rhizaria	D_3__Retaria	D_4__RAD A	D_5__uncultured eukaryote	D_6__	D_7__	D_8__	D_9__	D_10__	D_11__	D_12__	D_13__	D_14__	0.999976
6af684678223f63547a64653cc26ad43	OTU_1261	D_0__Eukaryota															1
2a2ddac3dbfeb90db79d65313e020e72	OTU_1262	D_0__Eukaryota															1
7d86884a2538406e90682f7a8c1080ae	OTU_1263	D_0__Eukaryota															1
ff443146eb36b9b8100f7af3cc9725f8	OTU_1264	D_0__Eukaryota															1
0b7b0d700ab9cdd4cf4b50a06ecdb034	OTU_1265	D_0__Eukaryota															1
0a5bd3d7a803a4d2ca1c5154f8eeb7d8	OTU_1266	D_0__Eukaryota	D_1__Archaeplastida	D_2__Chloroplastida	D_3__Chlorophyta	D_4__Clade VII	D_5__Subclade A	D_6__uncultured Chlorophyta	D_7__	D_8__	D_9__	D_10__	D_11__	D_12__	D_13__	D_14__	0.812495
38bb2aa433f92c5f3e80d60dcbfb48b6	OTU_1267	D_0__Eukaryota	D_1__SAR	D_2__Alveolata	D_3__Protalveolata	D_4__Syndiniales	D_5__Syndiniales Group II	D_6__uncultured eukaryote	D_7__	D_8__	D_9__	D_10__	D_11__	D_12__	D_13__	D_14__	0.863447
b7a4a6c13206d8af0a831569616f01d1	OTU_1268	D_0__Eukaryota	D_1__SAR	D_2__Stramenopiles	D_3__Ochrophyta	D_4__Diatomea	D_5__Bacillariophytina	D_6__Bacillariophyceae									0.736591
5b638ff3e2c72c9a92bef96fbf966667	OTU_1269	D_0__Eukaryota	D_1__Opisthokonta	D_2__Holozoa	D_3__Metazoa (Animalia)	D_4__Porifera	D_5__Demospongiae	D_6__Dictyoceratida	D_7__Dysidea avara	D_8__	D_9__	D_10__	D_11__	D_12__	D_13__	D_14__	0.998538
4cd26641b03bf325444f942bec46187e	OTU_1270	D_0__Eukaryota															1
a1f602978dbdfe577aea8e14b45d1da7	OTU_1271	D_0__Eukaryota	D_1__Opisthokonta	D_2__Nucletmycea	D_3__Fungi	D_4__Dikarya	D_5__Basidiomycota	D_6__Ustilaginomycotina	D_7__Malasseziomycetes	D_8__Malasseziales	D_9__Malasseziaceae	D_10__Malassezia	D_11__Malassezia pachydermatis	D_12__	D_13__	D_14__	0.82478
fbdbdd7a5ccf2e891817d68512a79944	OTU_1272	D_0__Eukaryota	D_1__SAR	D_2__Stramenopiles	D_3__Ochrophyta	D_4__Chrysophyceae	D_5__Chromulinales	D_6__Spumella									0.704725
9c3bf5887514551ba85f003549227d6d	OTU_1273	D_0__Eukaryota	D_1__SAR	D_2__Alveolata	D_3__Protalveolata	D_4__Syndiniales	D_5__Syndiniales Group II	D_6__uncultured eukaryote	D_7__	D_8__	D_9__	D_10__	D_11__	D_12__	D_13__	D_14__	0.920559
e740de2cbf36a84e92fe2ce0a959eea5	OTU_1274	D_0__Eukaryota	D_1__SAR	D_2__Alveolata	D_3__Ciliophora	D_4__Intramacronucleata	D_5__Spirotrichea	D_6__Oligotrichia	D_7__Strombidium	D_8__uncultured eukaryote	D_9__	D_10__	D_11__	D_12__	D_13__	D_14__	0.999692
1810b9684aba1ead49c81fe81618c309	OTU_1275	D_0__Eukaryota	D_1__Opisthokonta	D_2__Holozoa	D_3__Metazoa (Animalia)	D_4__Eumetazoa	D_5__Cnidaria	D_6__Hydrozoa	D_7__Hydroidolina								0.95068
bf840f4d30beb59d83ef63c5cf324f5a	OTU_1276	D_0__Eukaryota															1
7032f948324b40400716f4fc23e94f0e	OTU_1277	D_0__Eukaryota	D_1__SAR	D_2__Stramenopiles													0.990969
0b8fc7a47455a7ac49b03d792b040253	OTU_1278	D_0__Eukaryota	D_1__SAR	D_2__Alveolata	D_3__Dinoflagellata	D_4__Dinophyceae	D_5__Prorocentrales	D_6__Prorocentrum	D_7__uncultured eukaryote	D_8__	D_9__	D_10__	D_11__	D_12__	D_13__	D_14__	0.706498
eb18bb83312d9994d828e9a55f4f9bcc	OTU_1279	D_0__Eukaryota	D_1__SAR	D_2__Rhizaria	D_3__Retaria	D_4__Acantharia											0.860806
ac15c33b83fa56f2ab4085795f5ad6fd	OTU_1280	D_0__Eukaryota	D_1__SAR	D_2__Stramenopiles	D_3__MAST-7	D_4__MAST-7D	D_5__uncultured eukaryote	D_6__	D_7__	D_8__	D_9__	D_10__	D_11__	D_12__	D_13__	D_14__	0.988386
0604c4dbf4161b8eff5b2f9cc25e174d	OTU_1281	D_0__Eukaryota	D_1__Picozoa	D_2__Picomonadida	D_3__uncultured eukaryote	D_4__	D_5__	D_6__	D_7__	D_8__	D_9__	D_10__	D_11__	D_12__	D_13__	D_14__	0.919681
05fd9f279fb3a4ae449f30c2ba4542a9	OTU_1282	D_0__Eukaryota	D_1__SAR	D_2__Stramenopiles	D_3__Ochrophyta	D_4__Diatomea	D_5__Bacillariophytina	D_6__Bacillariophyceae									0.817579
689d3ac26c990ef7740adb531da6500e	OTU_1283	D_0__Eukaryota	D_1__SAR	D_2__Rhizaria	D_3__Cercozoa	D_4__Thecofilosea											0.985687
8b9d7edab86071c6fddd9d691771c3f4	OTU_1284	D_0__Eukaryota	D_1__SAR	D_2__Alveolata	D_3__Protalveolata	D_4__Syndiniales	D_5__Syndiniales Group I	D_6__uncultured marine eukaryote	D_7__	D_8__	D_9__	D_10__	D_11__	D_12__	D_13__	D_14__	0.999037
85ea138c35b9b06254d0c7b0538fd9db	OTU_1285	D_0__Eukaryota	D_1__Opisthokonta	D_2__Holozoa	D_3__Metazoa (Animalia)	D_4__Eumetazoa	D_5__Bilateria	D_6__Annelida	D_7__Polychaeta	D_8__Palpata	D_9__Eunicida	D_10__Parougia bermudensis	D_11__	D_12__	D_13__	D_14__	0.825952
634942b759c6f7408c751c8703c8c62d	OTU_1286	D_0__Eukaryota															1
236e63dd34c01f2e8989f866ed9cb184	OTU_1287	D_0__Eukaryota	D_1__SAR	D_2__Alveolata													0.991383
ef7be6014248f5088ac5262df40afb80	OTU_1288	D_0__Eukaryota	D_1__SAR	D_2__Stramenopiles	D_3__Peronosporomycetes	D_4__Halodaphnea	D_5__Halodaphnea panulirata	D_6__	D_7__	D_8__	D_9__	D_10__	D_11__	D_12__	D_13__	D_14__	0.999143
c0122e652a41a1e9ea055b935e645e57	OTU_1289	D_0__Eukaryota															1
512d3a3678c07c75609bfec6531fb27b	OTU_1290	D_0__Eukaryota															1
13a733568c72e6eb195fa169674b0b60	OTU_1291	D_0__Eukaryota	D_1__SAR	D_2__Stramenopiles	D_3__Ochrophyta	D_4__Diatomea	D_5__Bacillariophytina	D_6__Bacillariophyceae	D_7__Sellaphora	D_8__uncultured stramenopile	D_9__	D_10__	D_11__	D_12__	D_13__	D_14__	0.795385
f5b87601adf3ede6fbab0a117c5b417c	OTU_1292	D_0__Eukaryota	D_1__SAR	D_2__Alveolata													0.988153
7aae42869a7c57b093322a0f67fc4a4f	OTU_1293	D_0__Eukaryota															1
eb6d304775c631cdb57ccbaed5a2bfbd	OTU_1294	D_0__Eukaryota															1
0aa17160ea703b0a6be3345a0959d761	OTU_1295	D_0__Eukaryota	D_1__SAR	D_2__Alveolata	D_3__Apicomplexa	D_4__Novel Apicomplexa Class 2	D_5__Gregarinasina gen. sp. 1 KCW-2013	D_6__	D_7__	D_8__	D_9__	D_10__	D_11__	D_12__	D_13__	D_14__	0.826759
0411f3a79aae6f0a5952896073fa030a	OTU_1296	D_0__Eukaryota															1
b142fc6aa5cc894ac53f3c20baafa0e6	OTU_1297	D_0__Eukaryota	D_1__SAR	D_2__Alveolata	D_3__Dinoflagellata												0.988631
3b98fecdd7d183ea56de755faf52f019	OTU_1298	D_0__Eukaryota	D_1__Opisthokonta	D_2__Holozoa	D_3__Metazoa (Animalia)	D_4__Eumetazoa	D_5__Bilateria	D_6__Nematoda	D_7__Chromadorea	D_8__Chromadorida	D_9__uncultured eukaryote	D_10__	D_11__	D_12__	D_13__	D_14__	0.807298
035aec0a9cc9a614d279f1890323c938	OTU_1299	D_0__Eukaryota															1
dbbd278b8ebaf3a81e66f94a4cc0d7c0	OTU_1300	D_0__Eukaryota	D_1__SAR	D_2__Alveolata													0.874775
ba579c8a67d4debb90a9a66918dc04d2	OTU_1301	D_0__Eukaryota															1
351e6b4b148abfaafbac6dbd24312777	OTU_1302	D_0__Eukaryota															1
e89057be4b8647a0adcce4a1119821ef	OTU_1303	D_0__Eukaryota	D_1__Opisthokonta	D_2__Holozoa	D_3__Metazoa (Animalia)	D_4__Porifera	D_5__Demospongiae	D_6__Verongiida	D_7__Aplysina cavernicola	D_8__	D_9__	D_10__	D_11__	D_12__	D_13__	D_14__	0.999823
1ede951e2782ff5fbfa324fe9eb22cd8	OTU_1304	D_0__Eukaryota	D_1__SAR	D_2__Alveolata													0.99098
b6aa1205e662ab59e4c8340f75f54191	OTU_1305	D_0__Eukaryota	D_1__SAR	D_2__Alveolata	D_3__Dinoflagellata	D_4__Dinophyceae	D_5__Gymnodiniphycidae										0.752631
5e64c212de2026321844d6f526d739ff	OTU_1306	D_0__Eukaryota	D_1__Opisthokonta	D_2__Holozoa	D_3__Metazoa (Animalia)	D_4__Eumetazoa	D_5__Bilateria	D_6__Arthropoda	D_7__Crustacea	D_8__Maxillopoda	D_9__Copepoda	D_10__Calanoida	D_11__marine metagenome	D_12__	D_13__	D_14__	0.994778
f5fce54f730012c4595bb93838924357	OTU_1307	D_0__Eukaryota	D_1__SAR	D_2__Stramenopiles	D_3__Ochrophyta	D_4__Diatomea	D_5__Coscinodiscophytina	D_6__Fragilariales									0.991936
80e5cb3365d46f3946a6ac0cf74ebb04	OTU_1308	D_0__Eukaryota	D_1__Opisthokonta														0.731857
ff20b9c93f6c3b52e96171893f93afb9	OTU_1309	D_0__Eukaryota	D_1__SAR	D_2__Rhizaria	D_3__Retaria	D_4__Acantharia											0.918476
e2cd2294f8b43fccfa9711978bfb2f52	OTU_1310	D_0__Eukaryota	D_1__SAR	D_2__Alveolata	D_3__Dinoflagellata												0.703718
22e2b41eea2a593a276bc18ecfd94e9c	OTU_1311	D_0__Eukaryota															1
0588bc681030387e4348187160eee354	OTU_1312	D_0__Eukaryota	D_1__Opisthokonta	D_2__Holozoa	D_3__Metazoa (Animalia)	D_4__Eumetazoa	D_5__Bilateria	D_6__Arthropoda									0.942756
323c5e4dd4ec38b53579aea211b33c39	OTU_1313	D_0__Eukaryota	D_1__SAR	D_2__Alveolata	D_3__Protalveolata	D_4__Syndiniales	D_5__Syndiniales Group I	D_6__uncultured eukaryote	D_7__	D_8__	D_9__	D_10__	D_11__	D_12__	D_13__	D_14__	0.888449
b3494b06861a50608d8d2155c4734613	OTU_1314	D_0__Eukaryota	D_1__SAR	D_2__Alveolata													0.890955
18c478e3a2e36ffba8cabcd971f14149	OTU_1315	D_0__Eukaryota															1
07eac90220d59f1a95cc4f5350024724	OTU_1316	D_0__Eukaryota	D_1__SAR	D_2__Stramenopiles	D_3__Ochrophyta	D_4__Diatomea	D_5__Bacillariophytina	D_6__Mediophyceae	D_7__Talaroneis	D_8__Talaroneis posidoniae	D_9__	D_10__	D_11__	D_12__	D_13__	D_14__	0.843673
1fa18a3b718ae941e072c8aa98dc740e	OTU_1317	D_0__Eukaryota	D_1__Haptophyta	D_2__Prymnesiophyceae	D_3__Phaeocystis	D_4__uncultured haptophyte	D_5__	D_6__	D_7__	D_8__	D_9__	D_10__	D_11__	D_12__	D_13__	D_14__	0.99999
64daa88f592ba6207edce959666aca85	OTU_1318	D_0__Eukaryota	D_1__SAR	D_2__Alveolata	D_3__Dinoflagellata	D_4__Dinophyceae	D_5__Gymnodiniphycidae	D_6__uncultured	D_7__uncultured marine eukaryote	D_8__	D_9__	D_10__	D_11__	D_12__	D_13__	D_14__	0.967242
bb7d2e99771f6dc8768f4e4f824abf30	OTU_1319	D_0__Eukaryota	D_1__SAR	D_2__Rhizaria	D_3__Retaria	D_4__Acantharia											0.95404
903145687caf1718310d98227817a341	OTU_1320	D_0__Eukaryota	D_1__SAR	D_2__Stramenopiles	D_3__Ochrophyta	D_4__Diatomea	D_5__Coscinodiscophytina	D_6__Fragilariales	D_7__Synedra sp. p517	D_8__	D_9__	D_10__	D_11__	D_12__	D_13__	D_14__	0.946408
9a80c4ee49d87f01327b1f8c7be040fb	OTU_1321	D_0__Eukaryota	D_1__SAR	D_2__Alveolata	D_3__Dinoflagellata	D_4__Dinophyceae	D_5__Gymnodiniphycidae	D_6__Gymnodinium clade	D_7__Paragymnodinium	D_8__uncultured eukaryote	D_9__	D_10__	D_11__	D_12__	D_13__	D_14__	0.999971
a77d6a9490d6f34d741f84ae6bf6a005	OTU_1322	D_0__Eukaryota	D_1__Opisthokonta	D_2__Holozoa	D_3__Metazoa (Animalia)	D_4__Eumetazoa											0.717709
675324ab17b10b7ac11fa7698e490896	OTU_1323	D_0__Eukaryota	D_1__SAR	D_2__Stramenopiles	D_3__Labyrinthulomycetes	D_4__Thraustochytriaceae	D_5__Aplanochytrium										0.987557
fc0c842b913a0beec5549f7740ba2f35	OTU_1324	D_0__Eukaryota	D_1__SAR	D_2__Alveolata													0.998968
2808d5719f370193906cbd8d704c0a20	OTU_1325	D_0__Eukaryota	D_1__Opisthokonta	D_2__Holozoa	D_3__Metazoa (Animalia)	D_4__Eumetazoa	D_5__Bilateria										0.722493
8eb30b827521ebfbc3597e99fa4dd518	OTU_1326	D_0__Eukaryota	D_1__SAR	D_2__Alveolata	D_3__Dinoflagellata	D_4__Dinophyceae	D_5__Gymnodiniphycidae	D_6__Gymnodinium clade	D_7__Erythropsidinium								0.877617
511846f963dad9b82628ac9a42402044	OTU_1327	D_0__Eukaryota	D_1__SAR	D_2__Stramenopiles	D_3__Labyrinthulomycetes	D_4__Thraustochytriaceae	D_5__Aplanochytrium	D_6__uncultured marine eukaryote	D_7__	D_8__	D_9__	D_10__	D_11__	D_12__	D_13__	D_14__	0.824158
43581075f37ab44860842e9ce73de410	OTU_1328	D_0__Eukaryota	D_1__SAR	D_2__Alveolata													0.909938
7839d7e2d1c1262d5c64df6b91de9080	OTU_1329	D_0__Eukaryota	D_1__Opisthokonta														0.955673
52525ed487053b12ee81fc0c2a30014d	OTU_1330	D_0__Eukaryota	D_1__SAR	D_2__Stramenopiles	D_3__Ochrophyta	D_4__Chrysophyceae											0.969323
2c05a5426860195a480224b537bbf38f	OTU_1331	D_0__Eukaryota															1
ed590315c7e6fd82d340b9626a0e06aa	OTU_1332	D_0__Eukaryota	D_1__SAR	D_2__Stramenopiles													0.953088
11da5ddcd40370b6dfb0ab938c246cbd	OTU_1333	D_0__Eukaryota	D_1__Haptophyta	D_2__Prymnesiophyceae	D_3__Prymnesiales												0.783126
bd6ec654c13e3bb83de722a4e5ad4638	OTU_1334	D_0__Eukaryota															1
7d347e742628f10dc5e91e64abe06459	OTU_1335	D_0__Eukaryota	D_1__Excavata	D_2__Discoba	D_3__Discicristata	D_4__Euglenozoa											0.87859
505ecb793829443b5a476995b94aec93	OTU_1336	D_0__Eukaryota	D_1__SAR	D_2__Alveolata	D_3__Dinoflagellata	D_4__Dinophyceae											0.944074
db3e5d0a8489aa4b963e8fb75893f65a	OTU_1337	D_0__Eukaryota	D_1__SAR	D_2__Stramenopiles	D_3__MAST-3	D_4__MAST-3I											0.802906
598fd61de095e67e79d448c1f5d2b2a9	OTU_1338	D_0__Eukaryota	D_1__SAR	D_2__Rhizaria	D_3__Cercozoa	D_4__Ascetosporea	D_5__Paradiniidae	D_6__Paradinium	D_7__Paradinium poucheti	D_8__	D_9__	D_10__	D_11__	D_12__	D_13__	D_14__	0.993855
ee11c85b19bc43427a70e9022cd6b411	OTU_1339	D_0__Eukaryota	D_1__SAR	D_2__Stramenopiles	D_3__Ochrophyta	D_4__Eustigmatophyceae	D_5__Eustigmatales	D_6__uncultured	D_7__uncultured eukaryote	D_8__	D_9__	D_10__	D_11__	D_12__	D_13__	D_14__	1
8e8a5cfb54267a44e13152b2b90a9e8f	OTU_1340	D_0__Eukaryota															1
38e32dd95b1d34f35bcd15c830af1f90	OTU_1341	D_0__Eukaryota	D_1__SAR	D_2__Alveolata													0.983645
c47f0a889ae60acc4dc9245d171e43a6	OTU_1342	D_0__Eukaryota	D_1__SAR	D_2__Stramenopiles	D_3__Peronosporomycetes	D_4__Halodaphnea	D_5__Halodaphnea panulirata	D_6__	D_7__	D_8__	D_9__	D_10__	D_11__	D_12__	D_13__	D_14__	0.999989
fdf8e6a8bfc7b3fc1ff9e1ab87d2dd5e	OTU_1343	D_0__Eukaryota															1
10e97ceed38c1f4602537a5edd8dc441	OTU_1344	D_0__Eukaryota															1
bd01382cb852b2c5167e53716aa41db5	OTU_1345	D_0__Eukaryota	D_1__SAR	D_2__Alveolata	D_3__Dinoflagellata	D_4__Dinophyceae											0.747432
eddc26aa31ae418c86ab3fcd60c5bea2	OTU_1346	D_0__Eukaryota															1
278b6e8e498d1280c17bb9bb56396a23	OTU_1347	D_0__Eukaryota	D_1__SAR	D_2__Alveolata	D_3__Protalveolata	D_4__Syndiniales											0.867312
71129599d2f1ddc0f99a8d9c4d53808c	OTU_1348	D_0__Eukaryota	D_1__SAR	D_2__Alveolata	D_3__Protalveolata	D_4__Syndiniales	D_5__Amoebophrya	D_6__uncultured eukaryote	D_7__	D_8__	D_9__	D_10__	D_11__	D_12__	D_13__	D_14__	0.821312
5c263555371bb3e21a3feb256d9c5c9f	OTU_1349	D_0__Eukaryota	D_1__Opisthokonta	D_2__Holozoa	D_3__Metazoa (Animalia)	D_4__Eumetazoa	D_5__Bilateria	D_6__Arthropoda	D_7__Crustacea	D_8__Maxillopoda	D_9__Copepoda						0.973314
7529863b9b879cc93911ef96617bfd4a	OTU_1350	D_0__Eukaryota															1
4766b946ea4f3eaf0f058d8949b7c9af	OTU_1351	D_0__Eukaryota	D_1__SAR	D_2__Stramenopiles	D_3__Ochrophyta	D_4__Diatomea	D_5__Bacillariophytina	D_6__Bacillariophyceae	D_7__Campylodiscus	D_8__Campylodiscus thuretii	D_9__	D_10__	D_11__	D_12__	D_13__	D_14__	0.809982
800ee66d182cd8826e0624d69bb3233b	OTU_1352	D_0__Eukaryota	D_1__SAR	D_2__Alveolata													0.959801
1cee693796d97258dbb8cfeed2269c56	OTU_1353	D_0__Eukaryota	D_1__SAR	D_2__Stramenopiles	D_3__Ochrophyta												0.71321
ee886591ce5646adce0405b19b35647d	OTU_1354	D_0__Eukaryota															1
926a93f65423a4386b92570acb0d6ff7	OTU_1355	D_0__Eukaryota	D_1__SAR	D_2__Rhizaria	D_3__Cercozoa	D_4__Thecofilosea	D_5__Cryomonadida	D_6__Protaspidae	D_7__Protaspis	D_8__uncultured eukaryote	D_9__	D_10__	D_11__	D_12__	D_13__	D_14__	0.816069
b1e40e52be2d924bcc1c202e4b2cd0fa	OTU_1356	D_0__Eukaryota															1
61225bd680c6e4f3c50174b98914f224	OTU_1357	D_0__Eukaryota	D_1__Opisthokonta	D_2__Holozoa	D_3__Metazoa (Animalia)	D_4__Porifera	D_5__Demospongiae	D_6__Poecilosclerida	D_7__Clathria prolifera	D_8__	D_9__	D_10__	D_11__	D_12__	D_13__	D_14__	0.996094
45bbbede7b0b1b651774333d1b931d13	OTU_1358	D_0__Eukaryota															1
603dda33988b28aad5432b4546706d78	OTU_1359	D_0__Eukaryota	D_1__SAR	D_2__Alveolata	D_3__Dinoflagellata	D_4__Dinophyceae	D_5__Peridiniphycidae	D_6__Gonyaulacales	D_7__Azadinium	D_8__uncultured eukaryote	D_9__	D_10__	D_11__	D_12__	D_13__	D_14__	0.969848
c65bcc5c2bf51dfcfda0f1693e184e6a	OTU_1360	D_0__Eukaryota	D_1__SAR	D_2__Stramenopiles													0.995993
02601e78eb39fefa7a570cf5011862bd	OTU_1361	D_0__Eukaryota	D_1__SAR	D_2__Alveolata	D_3__Apicomplexa	D_4__Conoidasida	D_5__Gregarinasina	D_6__Archigregarinorida	D_7__Selenidium								0.987083
01023adef541528530d3627abaf6e91b	OTU_1362	D_0__Eukaryota	D_1__SAR	D_2__Stramenopiles	D_3__Ochrophyta	D_4__Diatomea	D_5__Bacillariophytina	D_6__Bacillariophyceae									0.920825
ec79c7100a7f6d2fef49521a50a3e3a0	OTU_1363	D_0__Eukaryota	D_1__SAR	D_2__Stramenopiles	D_3__Ochrophyta	D_4__Chrysophyceae											0.917427
e7d60457845730928e0dc41522a02768	OTU_1364	D_0__Eukaryota															1
5b41f30b95c7b468b0c6529b8031d963	OTU_1365	D_0__Eukaryota	D_1__SAR	D_2__Alveolata	D_3__Dinoflagellata	D_4__Dinophyceae	D_5__Gymnodiniphycidae	D_6__Suessiaceae	D_7__Symbiodinium	D_8__uncultured marine eukaryote	D_9__	D_10__	D_11__	D_12__	D_13__	D_14__	0.9426
0777c40b0866422c8dedbb88b0dc5ea5	OTU_1366	D_0__Eukaryota	D_1__Opisthokonta														0.957875
159d8a2536eb58ecf4d88b880e247e0a	OTU_1367	D_0__Eukaryota	D_1__Haptophyta	D_2__Haptophyceae sp. EE-2014	D_3__	D_4__	D_5__	D_6__	D_7__	D_8__	D_9__	D_10__	D_11__	D_12__	D_13__	D_14__	0.999999
b53fd3e6856ef5064cebe91f7aae5128	OTU_1368	D_0__Eukaryota	D_1__Opisthokonta	D_2__Holozoa	D_3__Metazoa (Animalia)	D_4__Eumetazoa	D_5__Bilateria	D_6__Arthropoda	D_7__Crustacea	D_8__Maxillopoda	D_9__Copepoda	D_10__Cyclopoida	D_11__uncultured eukaryote	D_12__	D_13__	D_14__	0.994148
7520d33343077f73fe41996dc563e2fd	OTU_1369	D_0__Eukaryota	D_1__Opisthokonta	D_2__Nucletmycea	D_3__Fungi												0.97426
2a1bedd1a36b5c644ccc3cfaa9d85ac1	OTU_1370	D_0__Eukaryota	D_1__SAR	D_2__Alveolata	D_3__Dinoflagellata	D_4__Dinophyceae	D_5__Peridiniphycidae	D_6__Gonyaulacales	D_7__Gonyaulax	D_8__Gonyaulax polygramma	D_9__	D_10__	D_11__	D_12__	D_13__	D_14__	1
1e2f6ead6d95001ddf5c047f4960c8c9	OTU_1371	D_0__Eukaryota	D_1__Opisthokonta	D_2__Holozoa	D_3__Metazoa (Animalia)	D_4__Eumetazoa	D_5__Cnidaria	D_6__Anthozoa	D_7__Hexacorallia	D_8__Corallimorpharia							0.762422
37c7e28501bc174d47cc815807aebb0d	OTU_1372	D_0__Eukaryota															1
7304a7011d8b7c790ef9df2086ebf0d5	OTU_1373	D_0__Eukaryota	D_1__Opisthokonta	D_2__Holozoa	D_3__Metazoa (Animalia)	D_4__Eumetazoa	D_5__Bilateria	D_6__Xenacoelomorpha	D_7__Acoelomorpha	D_8__Acoela	D_9__Simplicomorpha gigantorhabditis	D_10__	D_11__	D_12__	D_13__	D_14__	0.975455
20c4422eece1909866f69cf970cde925	OTU_1374	D_0__Eukaryota															1
88a243c997a25265a31e38271190777d	OTU_1375	D_0__Eukaryota															1
3c7f103872fb5d25f4cf8e11cc905413	OTU_1376	D_0__Eukaryota	D_1__Archaeplastida	D_2__Rhodophyceae	D_3__Florideophycidae	D_4__Rhodymeniophycidae	D_5__Herposiphonia	D_6__Herposiphonia parca	D_7__	D_8__	D_9__	D_10__	D_11__	D_12__	D_13__	D_14__	0.839716
6a85d4f56e01a369d211bd112d4bb410	OTU_1377	D_0__Eukaryota															1
5b29af25c98689ff871e3fdb738b38a3	OTU_1378	D_0__Eukaryota	D_1__Opisthokonta	D_2__Holozoa	D_3__Metazoa (Animalia)	D_4__Eumetazoa	D_5__Bilateria	D_6__Arthropoda									0.917316
1138cf88e8618891274b7ab0980a86ff	OTU_1379	D_0__Eukaryota															1
16deaa8aa6c2f9b32f589727b9d619c8	OTU_1380	D_0__Eukaryota															1
6fee4e33ccce2f9d8e58c6bf76880a59	OTU_1381	D_0__Eukaryota	D_1__Opisthokonta	D_2__Holozoa	D_3__Metazoa (Animalia)	D_4__Eumetazoa	D_5__Bilateria	D_6__Annelida	D_7__Polychaeta	D_8__Scolecida	D_9__Spionida						0.996732
fa0e18082c98236c9bc24249182b9e13	OTU_1382	D_0__Eukaryota	D_1__SAR	D_2__Stramenopiles	D_3__Peronosporomycetes	D_4__Halodaphnea	D_5__Halodaphnea panulirata	D_6__	D_7__	D_8__	D_9__	D_10__	D_11__	D_12__	D_13__	D_14__	0.999218
829ddbcf26c919c7b8ed2020337c774d	OTU_1383	D_0__Eukaryota	D_1__SAR	D_2__Stramenopiles	D_3__Labyrinthulomycetes	D_4__Thraustochytriaceae	D_5__Aplanochytrium	D_6__uncultured eukaryote	D_7__	D_8__	D_9__	D_10__	D_11__	D_12__	D_13__	D_14__	0.99652
9f01fc1a48574bf0914e7b6f2fd0af51	OTU_1384	D_0__Eukaryota	D_1__SAR	D_2__Stramenopiles	D_3__Ochrophyta	D_4__Diatomea	D_5__Bacillariophytina	D_6__Bacillariophyceae									0.999294
d4cfb42aa87716f0250fa946d2324c1a	OTU_1385	D_0__Eukaryota															1
209ba26169458a4209852f0f74b82398	OTU_1386	D_0__Eukaryota	D_1__SAR	D_2__Alveolata	D_3__Dinoflagellata	D_4__Dinophyceae	D_5__Gymnodiniphycidae	D_6__Suessiaceae	D_7__Pelagodinium	D_8__Protodinium simplex	D_9__	D_10__	D_11__	D_12__	D_13__	D_14__	0.855223
58a6134dba24c345f2468027a3d09e80	OTU_1387	D_0__Eukaryota	D_1__SAR	D_2__Alveolata	D_3__Protalveolata	D_4__Syndiniales	D_5__Syndiniales Group II	D_6__uncultured eukaryote	D_7__	D_8__	D_9__	D_10__	D_11__	D_12__	D_13__	D_14__	0.946059
e6049f0b73c9058c04b346c44d793494	OTU_1388	D_0__Eukaryota	D_1__Opisthokonta	D_2__Nucletmycea	D_3__Fungi	D_4__Chytridiomycota	D_5__Incertae Sedis	D_6__Chytridiomycetes									0.936277
f24b916067ada7abeb71ee272165ef27	OTU_1389	D_0__Eukaryota	D_1__Haptophyta	D_2__Prymnesiophyceae	D_3__Prymnesiales	D_4__Chrysochromulina	D_5__uncultured marine eukaryote	D_6__	D_7__	D_8__	D_9__	D_10__	D_11__	D_12__	D_13__	D_14__	0.999995
669bdfbc0ef9a1007f2a7e2e8ba3bc9a	OTU_1390	D_0__Eukaryota															1
76073c24f1c4f0b6746d7c6bf2a724ab	OTU_1391	D_0__Eukaryota	D_1__SAR	D_2__Stramenopiles	D_3__Ochrophyta	D_4__Diatomea											0.980443
2dd5bf4dc3ab7541458d456ebfa20435	OTU_1392	D_0__Eukaryota															1
8e2218ea33975ea356204923de9a00e5	OTU_1393	D_0__Eukaryota															1
ef6c8fbb5ac358f8070e3b5b69ded8ea	OTU_1394	D_0__Eukaryota	D_1__Opisthokonta	D_2__Holozoa	D_3__Metazoa (Animalia)	D_4__Eumetazoa	D_5__Bilateria	D_6__Annelida	D_7__Polychaeta	D_8__Palpata	D_9__Phyllodocida						0.999867
1f4118da4bd7ffed367d14631b16922e	OTU_1395	D_0__Eukaryota															1
cbc8f5e6c82c330a687ff1d23753177d	OTU_1396	D_0__Eukaryota	D_1__Cryptophyceae	D_2__Cryptomonadales	D_3__Teleaulax	D_4__metagenome	D_5__	D_6__	D_7__	D_8__	D_9__	D_10__	D_11__	D_12__	D_13__	D_14__	0.954436
b427e4b03fd136a9eab4d9c6e6c865ac	OTU_1397	D_0__Eukaryota	D_1__SAR	D_2__Stramenopiles													0.974292
3bd8cd2b488df7180b8b8edcfbe10496	OTU_1398	D_0__Eukaryota	D_1__SAR	D_2__Alveolata	D_3__Ciliophora	D_4__Intramacronucleata	D_5__Spirotrichea	D_6__Oligotrichia									0.89809
be4feba56df312678b2b53e6cbf79b63	OTU_1399	D_0__Eukaryota															1
0f954bc571dfe3e22e6d25d0665af78e	OTU_1400	D_0__Eukaryota	D_1__SAR	D_2__Alveolata	D_3__Ciliophora	D_4__Intramacronucleata	D_5__Spirotrichea	D_6__Choreotrichia	D_7__Rimostrombidium	D_8__uncultured eukaryote	D_9__	D_10__	D_11__	D_12__	D_13__	D_14__	0.907636
eedc4f80088599770679798a7d9951fb	OTU_1401	D_0__Eukaryota															1
132cc204ed9f288def888383d94ac7d8	OTU_1402	D_0__Eukaryota															1
02b23665580c7b035cf4044de115b3ae	OTU_1403	D_0__Eukaryota	D_1__Opisthokonta														0.954353
28a0eba48f048049dfb0c541868a6fec	OTU_1404	D_0__Eukaryota	D_1__SAR	D_2__Stramenopiles	D_3__Ochrophyta	D_4__Diatomea	D_5__Bacillariophytina	D_6__Bacillariophyceae									0.842199
37bb8345c4faf39af52b9de6817c4f0a	OTU_1405	D_0__Eukaryota	D_1__SAR	D_2__Stramenopiles	D_3__Ochrophyta	D_4__Diatomea	D_5__Bacillariophytina	D_6__Bacillariophyceae									0.973725
cadaf9be9b43cc97d975df107a74915e	OTU_1406	D_0__Eukaryota	D_1__Opisthokonta	D_2__Nucletmycea	D_3__Fungi	D_4__Dikarya	D_5__Ascomycota	D_6__Saccharomycotina	D_7__Saccharomycetes	D_8__Saccharomycetales	D_9__Incertae Sedis	D_10__Starmerella-Candida clade	D_11__[Candida] etchellsii	D_12__	D_13__	D_14__	0.988769
84c522bd1b94a9b90df8f2e4a9f4cedc	OTU_1407	D_0__Eukaryota	D_1__Opisthokonta	D_2__Holozoa	D_3__Metazoa (Animalia)	D_4__Eumetazoa	D_5__Bilateria	D_6__Gastrotricha	D_7__Chaetonotida	D_8__uncultured eukaryote	D_9__	D_10__	D_11__	D_12__	D_13__	D_14__	0.808745
efb7dd8ed72b3bcaa7b9ea9c4553e253	OTU_1408	D_0__Eukaryota															1
3a0a529e6e66250c857b9e4a85e5df93	OTU_1409	D_0__Eukaryota	D_1__Picozoa	D_2__Picomonadida	D_3__uncultured eukaryote	D_4__	D_5__	D_6__	D_7__	D_8__	D_9__	D_10__	D_11__	D_12__	D_13__	D_14__	0.999243
438d2f898d9796cee0cf6b3ab28ae9c3	OTU_1410	D_0__Eukaryota	D_1__Excavata	D_2__Discoba	D_3__Discicristata	D_4__Euglenozoa	D_5__Diplonemea	D_6__Diplonema	D_7__Diplonema sp. ATCC 50225	D_8__	D_9__	D_10__	D_11__	D_12__	D_13__	D_14__	0.737067
49ac4d990e4665029514be5cf7b88842	OTU_1411	D_0__Eukaryota	D_1__Opisthokonta	D_2__Holozoa	D_3__Metazoa (Animalia)	D_4__Eumetazoa	D_5__Bilateria										0.797305
5d485977bf39cd4ad29d641fd70d0879	OTU_1412	D_0__Eukaryota	D_1__SAR	D_2__Rhizaria	D_3__Retaria	D_4__Acantharia											0.893898
dcace6bc6e88b95059da16bc4128c662	OTU_1413	D_0__Eukaryota	D_1__SAR	D_2__Stramenopiles	D_3__Peronosporomycetes	D_4__Phytophthora											0.703172
dce2cf3212e43704f6289d01d813adcb	OTU_1414	D_0__Eukaryota	D_1__SAR	D_2__Stramenopiles	D_3__Ochrophyta	D_4__Diatomea	D_5__Bacillariophytina	D_6__Bacillariophyceae									0.800313
691e9b0a803ce585f4876cdad637c5b5	OTU_1415	D_0__Eukaryota	D_1__Archaeplastida	D_2__Rhodophyceae	D_3__Florideophycidae	D_4__Corallinophycidae	D_5__Neogoniolithon	D_6__uncultured Corallinales	D_7__	D_8__	D_9__	D_10__	D_11__	D_12__	D_13__	D_14__	0.998525
3325892f33007df51d55853685f4ecbf	OTU_1416	D_0__Eukaryota															1
dc0ee9abadd8cd814e69a6470dc33121	OTU_1417	D_0__Eukaryota															1
7a49bb73f94ef7a5a79a84640858c011	OTU_1418	D_0__Eukaryota	D_1__SAR	D_2__Stramenopiles	D_3__Labyrinthulomycetes	D_4__uncultured	D_5__Oblongichytrium sp. TN6	D_6__	D_7__	D_8__	D_9__	D_10__	D_11__	D_12__	D_13__	D_14__	0.898023
fd2eacd8651fef8a5e45a8aa8d272f68	OTU_1419	D_0__Eukaryota															1
c3f18a5ccb934658008f04dcd41dce1a	OTU_1420	D_0__Eukaryota															1
475e2d8219963a2cb22342b666b2f5cc	OTU_1421	D_0__Eukaryota	D_1__Opisthokonta	D_2__Holozoa	D_3__Metazoa (Animalia)	D_4__Eumetazoa	D_5__Bilateria	D_6__Arthropoda	D_7__Crustacea	D_8__Maxillopoda	D_9__Copepoda	D_10__Calanoida	D_11__uncultured eukaryote	D_12__	D_13__	D_14__	0.959773
39ca12149756e0b923dc45f8821ba5af	OTU_1422	D_0__Eukaryota	D_1__Opisthokonta	D_2__Holozoa	D_3__Metazoa (Animalia)	D_4__Eumetazoa	D_5__Cnidaria	D_6__Hydrozoa	D_7__Hydroidolina	D_8__Leptothecata	D_9__Clytia sp. AGC-2001	D_10__	D_11__	D_12__	D_13__	D_14__	0.986597
f253208d788fb1de2f804b34fb57154e	OTU_1423	D_0__Eukaryota	D_1__Opisthokonta	D_2__Holozoa	D_3__Metazoa (Animalia)	D_4__Eumetazoa	D_5__Bilateria	D_6__Annelida	D_7__Polychaeta	D_8__Scolecida	D_9__Capitellida						0.829649
845b7344235f53c0242da5b27794706b	OTU_1424	D_0__Eukaryota															1
753185ba639a173b580721784f05705e	OTU_1425	D_0__Eukaryota	D_1__Opisthokonta	D_2__Holozoa	D_3__Metazoa (Animalia)	D_4__Eumetazoa	D_5__Bilateria	D_6__uncultured	D_7__uncultured eukaryote	D_8__	D_9__	D_10__	D_11__	D_12__	D_13__	D_14__	0.939707
d1e3dccb65ff4529397b6698d13bb844	OTU_1426	D_0__Eukaryota	D_1__Opisthokonta	D_2__Holozoa	D_3__Metazoa (Animalia)	D_4__Eumetazoa	D_5__Bilateria	D_6__Arthropoda	D_7__Crustacea	D_8__Maxillopoda	D_9__Copepoda						0.994148
eda4062f99988a5c1186e929f4aa8a47	OTU_1427	D_0__Eukaryota	D_1__Archaeplastida	D_2__Chloroplastida	D_3__Charophyta	D_4__Phragmoplastophyta	D_5__Streptophyta	D_6__Embryophyta	D_7__Tracheophyta	D_8__Spermatophyta	D_9__Magnoliophyta						0.707724
31dacf7f753f8705c28c0f9f1777443f	OTU_1428	D_0__Eukaryota	D_1__Opisthokonta	D_2__Holozoa	D_3__Metazoa (Animalia)	D_4__Eumetazoa	D_5__Bilateria										0.977054
11f5de10fed35d299c9006b210d5dbeb	OTU_1429	D_0__Eukaryota	D_1__SAR	D_2__Alveolata	D_3__Ciliophora	D_4__Intramacronucleata	D_5__Spirotrichea	D_6__Oligotrichia									0.911099
d8a3b78f236841a927914f39881c59d7	OTU_1430	D_0__Eukaryota	D_1__SAR	D_2__Stramenopiles	D_3__Ochrophyta	D_4__Chrysophyceae	D_5__uncultured	D_6__uncultured marine picoeukaryote	D_7__	D_8__	D_9__	D_10__	D_11__	D_12__	D_13__	D_14__	0.978664
ec1b29a072cc1d867eba1be69ea208ff	OTU_1431	D_0__Eukaryota	D_1__Haptophyta	D_2__Prymnesiophyceae	D_3__Prymnesiales	D_4__Chrysochromulina											0.831757
c19d4e287e8bfd5b1e53cfc209dd3214	OTU_1432	D_0__Eukaryota															1
f74088947b2094a646ea6d9cab979979	OTU_1433	D_0__Eukaryota	D_1__SAR	D_2__Alveolata	D_3__Protalveolata	D_4__Syndiniales	D_5__Amoebophrya	D_6__uncultured eukaryote	D_7__	D_8__	D_9__	D_10__	D_11__	D_12__	D_13__	D_14__	0.930797
614b95a87579746151aa8dcacc953d22	OTU_1434	D_0__Eukaryota	D_1__Opisthokonta	D_2__Holozoa	D_3__Metazoa (Animalia)	D_4__Eumetazoa	D_5__Bilateria	D_6__Arthropoda									0.998728
1dee6815806f4a464816e1ccc1e4382b	OTU_1435	D_0__Eukaryota	D_1__Opisthokonta	D_2__Holozoa	D_3__Metazoa (Animalia)	D_4__Eumetazoa	D_5__Bilateria	D_6__Arthropoda	D_7__Crustacea	D_8__Maxillopoda	D_9__Copepoda	D_10__Cyclopoida	D_11__uncultured eukaryote	D_12__	D_13__	D_14__	0.999666
164a3fcff497fee6e82aa113b51f85e4	OTU_1436	D_0__Eukaryota	D_1__SAR	D_2__Alveolata	D_3__Dinoflagellata	D_4__Dinophyceae	D_5__Gymnodiniphycidae	D_6__Amphidinium									0.998316
6737130a5d2c9b33ea3f7666966bccd8	OTU_1437	D_0__Eukaryota	D_1__Opisthokonta	D_2__Holozoa	D_3__Metazoa (Animalia)	D_4__Eumetazoa	D_5__Bilateria	D_6__Arthropoda	D_7__Crustacea	D_8__Maxillopoda	D_9__Copepoda	D_10__uncultured eukaryote	D_11__	D_12__	D_13__	D_14__	0.961148
0554fa879ff247ebdb6efe279fb66640	OTU_1438	D_0__Eukaryota	D_1__SAR	D_2__Alveolata													0.973076
083972e05c22d99dce0a2ca26f47efb9	OTU_1439	D_0__Eukaryota															1
923815afc95ea2fbd9823d9d5bbcb7e7	OTU_1440	D_0__Eukaryota	D_1__Opisthokonta	D_2__Holozoa	D_3__Metazoa (Animalia)	D_4__Eumetazoa	D_5__Bilateria	D_6__Chordata	D_7__Tunicata	D_8__Ascidiacea	D_9__Enterogona						0.976536
f5c5db5b28b87003cc2a69281a8f0d19	OTU_1441	D_0__Eukaryota	D_1__Opisthokonta	D_2__Holozoa	D_3__Metazoa (Animalia)	D_4__Eumetazoa	D_5__Bilateria	D_6__Gastrotricha	D_7__Chaetonotida	D_8__Chaetonotus neptuni	D_9__	D_10__	D_11__	D_12__	D_13__	D_14__	0.905119
e2daed1e36022ae26f22ab525d3aadd3	OTU_1442	D_0__Eukaryota	D_1__Archaeplastida	D_2__Rhodophyceae	D_3__Florideophycidae	D_4__Rhodymeniophycidae											0.999894
c7c6aaaa22555d3a732700b6ddfe076c	OTU_1443	D_0__Eukaryota															1
c3838e4a166896f3bcd28788e2f61358	OTU_1444	D_0__Eukaryota	D_1__SAR	D_2__Stramenopiles													0.956264
1e9ca6bb74c58abe8e98c7e3c46745fb	OTU_1445	D_0__Eukaryota	D_1__Opisthokonta	D_2__Holozoa	D_3__Metazoa (Animalia)	D_4__Eumetazoa	D_5__Bilateria	D_6__Xenacoelomorpha	D_7__Acoelomorpha	D_8__Acoela							0.761701
ebf58ffc8faea90f7e1b1dafdbd69c62	OTU_1446	D_0__Eukaryota	D_1__Excavata	D_2__Discoba	D_3__Discicristata	D_4__Euglenozoa	D_5__Euglenida	D_6__Heteronematina	D_7__Petalomonas	D_8__uncultured eukaryote	D_9__	D_10__	D_11__	D_12__	D_13__	D_14__	0.999923
98ccbc453866bf14ebd1ca97255595ad	OTU_1447	D_0__Eukaryota															1
5a4f2bce9b3fa45e28e68bfe737fe64f	OTU_1448	D_0__Eukaryota	D_1__SAR	D_2__Alveolata	D_3__Ciliophora	D_4__Intramacronucleata	D_5__Spirotrichea	D_6__Oligotrichia	D_7__uncultured	D_8__uncultured eukaryote	D_9__	D_10__	D_11__	D_12__	D_13__	D_14__	0.882204
d420acb29338f254eb4269c3dbf859f1	OTU_1449	D_0__Eukaryota	D_1__Incertae Sedis	D_2__Telonema	D_3__uncultured Telonema	D_4__	D_5__	D_6__	D_7__	D_8__	D_9__	D_10__	D_11__	D_12__	D_13__	D_14__	0.865663
f415c6b5729a6e27b32d2dd11e0aabeb	OTU_1450	D_0__Eukaryota															1
5d00d0744f575c681621fdf2daaa251d	OTU_1451	D_0__Eukaryota	D_1__Opisthokonta	D_2__Holozoa	D_3__Metazoa (Animalia)	D_4__Eumetazoa	D_5__Bilateria	D_6__Annelida	D_7__Polychaeta	D_8__Scolecida	D_9__Spionida						0.999898
5d1088642547c1c162849955da6d5339	OTU_1452	D_0__Eukaryota	D_1__Opisthokonta	D_2__Holozoa	D_3__Metazoa (Animalia)	D_4__Eumetazoa	D_5__Ctenophora	D_6__Tentaculata	D_7__Cydippida	D_8__Pleurobrachia bachei	D_9__	D_10__	D_11__	D_12__	D_13__	D_14__	0.999994
65074c68e7bd9596a1d8a09a644907de	OTU_1453	D_0__Eukaryota															1
3809b7d406a2bfd596707c4601718a0c	OTU_1454	D_0__Eukaryota	D_1__SAR	D_2__Alveolata													0.935997
9415ac4de779f6c06de7f92606c9fa0c	OTU_1455	D_0__Eukaryota	D_1__Archaeplastida	D_2__Chloroplastida	D_3__Chlorophyta	D_4__Clade VII	D_5__Subclade A	D_6__uncultured eukaryote	D_7__	D_8__	D_9__	D_10__	D_11__	D_12__	D_13__	D_14__	0.999861
e8e6a0884f6a14e124f98f35b6a793de	OTU_1456	D_0__Eukaryota															1
ea807f39b02b2917a6c342350230fc86	OTU_1457	D_0__Eukaryota	D_1__SAR	D_2__Rhizaria	D_3__Retaria	D_4__RAD B	D_5__uncultured eukaryote	D_6__	D_7__	D_8__	D_9__	D_10__	D_11__	D_12__	D_13__	D_14__	0.999976
c21f127797865f6b443b2b6a2c3797db	OTU_1458	D_0__Eukaryota	D_1__Opisthokonta	D_2__Holozoa	D_3__Metazoa (Animalia)	D_4__Eumetazoa	D_5__Bilateria	D_6__Arthropoda	D_7__Crustacea	D_8__Maxillopoda	D_9__Copepoda	D_10__Harpacticoida					0.827572
fbd99d795a590cd735ab19234107c4db	OTU_1459	D_0__Eukaryota	D_1__Opisthokonta	D_2__Holozoa	D_3__Metazoa (Animalia)	D_4__Porifera	D_5__Demospongiae	D_6__Dictyoceratida	D_7__Hippospongia communis (horse sponge)	D_8__	D_9__	D_10__	D_11__	D_12__	D_13__	D_14__	0.999903
e467556d7e908d01a31d9327b1e9a9d3	OTU_1460	D_0__Eukaryota															1
5d3b28aca33b5d7b1a07f21c4ceb01aa	OTU_1461	D_0__Eukaryota	D_1__SAR	D_2__Alveolata	D_3__Ciliophora	D_4__Intramacronucleata	D_5__Spirotrichea	D_6__Oligotrichia									0.969408
f51c3d44a2078db80457551ecd4efbe9	OTU_1462	D_0__Eukaryota	D_1__Opisthokonta														0.93362
a24254ea3e8b125280f1d0f8c4d58b6d	OTU_1463	D_0__Eukaryota															1
27d35a4085d04d779f173848588fd11e	OTU_1464	D_0__Eukaryota	D_1__SAR														0.996596
f2f6a4d69ef1597a9dd7796b3758356e	OTU_1465	D_0__Eukaryota	D_1__SAR	D_2__Stramenopiles	D_3__Ochrophyta	D_4__Chrysophyceae	D_5__Ochromonadales	D_6__Paraphysomonas	D_7__uncultured stramenopile	D_8__	D_9__	D_10__	D_11__	D_12__	D_13__	D_14__	0.970171
8e262b072aadd96a53a3b7517f2ef8d0	OTU_1466	D_0__Eukaryota	D_1__SAR	D_2__Stramenopiles	D_3__Ochrophyta	D_4__Diatomea	D_5__Bacillariophytina	D_6__Bacillariophyceae									0.969834
44488dd98f095bf5dd51b4b22326b331	OTU_1467	D_0__Eukaryota	D_1__SAR	D_2__Alveolata	D_3__Dinoflagellata	D_4__Dinophyceae											0.731115
af37835a937093fe8c2d4b7cc62a22f0	OTU_1468	D_0__Eukaryota															1
99be4c2156728be8b978dce99e687206	OTU_1469	D_0__Eukaryota	D_1__SAR	D_2__Stramenopiles													0.966261
338d87afa3902cfb8ff0152bae40e9dd	OTU_1470	D_0__Eukaryota	D_1__Opisthokonta	D_2__Holozoa	D_3__Metazoa (Animalia)	D_4__Eumetazoa	D_5__Bilateria	D_6__Annelida	D_7__Polychaeta	D_8__Palpata	D_9__Phyllodocida	D_10__Typosyllis cf. lutea MTA-2011	D_11__	D_12__	D_13__	D_14__	0.999934
0ca1020ce72e889c8f1e5cbe79697de2	OTU_1471	D_0__Eukaryota	D_1__SAR	D_2__Stramenopiles	D_3__Ochrophyta	D_4__Diatomea	D_5__Bacillariophytina	D_6__Bacillariophyceae	D_7__Amphora	D_8__Amphora sp. 36	D_9__	D_10__	D_11__	D_12__	D_13__	D_14__	0.778032
31ca7515489ad9dac63ad7559ba216de	OTU_1472	D_0__Eukaryota	D_1__SAR	D_2__Alveolata	D_3__Dinoflagellata	D_4__Dinophyceae	D_5__Gymnodiniphycidae										0.795905
9fc177893f887b58f7031d27c503f36b	OTU_1473	D_0__Eukaryota	D_1__SAR	D_2__Alveolata	D_3__Ciliophora	D_4__Intramacronucleata	D_5__Spirotrichea	D_6__Hypotrichia									0.850013
4e027f9264d004e7958fab68e81cee2b	OTU_1474	D_0__Eukaryota	D_1__SAR	D_2__Stramenopiles	D_3__Ochrophyta	D_4__Diatomea	D_5__Bacillariophytina	D_6__Mediophyceae	D_7__Minutocellus	D_8__uncultured Minutocellus	D_9__	D_10__	D_11__	D_12__	D_13__	D_14__	0.998979
174efef91504b5cd85c34780c6c0c463	OTU_1475	D_0__Eukaryota	D_1__SAR	D_2__Stramenopiles	D_3__Ochrophyta	D_4__Diatomea	D_5__Bacillariophytina	D_6__Bacillariophyceae									0.731276
cb2f5a455a38f2eee7a53e1e9e278eb5	OTU_1476	D_0__Eukaryota	D_1__SAR	D_2__Alveolata	D_3__Ciliophora	D_4__Intramacronucleata	D_5__Conthreep	D_6__Colpodea									0.897363
01e81f9b15e35d94c578da02f79746a0	OTU_1477	D_0__Eukaryota	D_1__SAR	D_2__Stramenopiles	D_3__Ochrophyta	D_4__Diatomea	D_5__Bacillariophytina	D_6__Bacillariophyceae									0.882117
cb065c152552ec990a3724cef790ce8a	OTU_1478	D_0__Eukaryota															1
5d828509a91652657e3be3224fd55ae8	OTU_1479	D_0__Eukaryota	D_1__SAR	D_2__Alveolata	D_3__Dinoflagellata	D_4__Dinophyceae	D_5__Peridiniphycidae	D_6__Peridiniales	D_7__Heterocapsa	D_8__uncultured eukaryote	D_9__	D_10__	D_11__	D_12__	D_13__	D_14__	0.981666
d23b1d71781672fe1934f04ee8b4ea7e	OTU_1480	D_0__Eukaryota	D_1__SAR	D_2__Stramenopiles	D_3__Ochrophyta	D_4__Chrysophyceae	D_5__uncultured	D_6__uncultured eukaryote	D_7__	D_8__	D_9__	D_10__	D_11__	D_12__	D_13__	D_14__	0.999391
1d30b037cf3757b27a2be765283a7ee6	OTU_1481	D_0__Eukaryota	D_1__SAR	D_2__Alveolata	D_3__Protalveolata	D_4__Syndiniales	D_5__Amoebophrya	D_6__uncultured eukaryote	D_7__	D_8__	D_9__	D_10__	D_11__	D_12__	D_13__	D_14__	0.93926
d4b923dfd394ac43b1abb175fed11c7d	OTU_1482	D_0__Eukaryota	D_1__SAR	D_2__Alveolata	D_3__Ciliophora	D_4__Intramacronucleata	D_5__Spirotrichea	D_6__Hypotrichia									0.771039
e88a4c29d1fb7d97088421c87f9769b3	OTU_1483	D_0__Eukaryota	D_1__SAR	D_2__Alveolata													0.860401
a0d693e695b9b2d638ffd100e8d7682f	OTU_1484	D_0__Eukaryota	D_1__SAR	D_2__Stramenopiles	D_3__Ochrophyta	D_4__Diatomea											0.964899
36d6654dfc8cb02ec2af098873ddbcf5	OTU_1485	D_0__Eukaryota	D_1__Opisthokonta	D_2__Holozoa	D_3__Metazoa (Animalia)	D_4__Eumetazoa	D_5__Bilateria	D_6__Arthropoda	D_7__Crustacea	D_8__Maxillopoda	D_9__Copepoda						0.997247
f37fcaba06118ce1a21a7d5363a4086b	OTU_1486	D_0__Eukaryota															1
fb6a798d3b2b1c31303089c05f853ca6	OTU_1487	D_0__Eukaryota	D_1__SAR	D_2__Alveolata	D_3__Protalveolata	D_4__Syndiniales	D_5__Syndiniales Group I	D_6__uncultured eukaryote	D_7__	D_8__	D_9__	D_10__	D_11__	D_12__	D_13__	D_14__	0.919839
6103b25e44947fec9a29b180eb22222f	OTU_1488	D_0__Eukaryota	D_1__SAR	D_2__Stramenopiles	D_3__Ochrophyta	D_4__Diatomea											0.996954
e019d8b6a517962c52c66970f063fa5c	OTU_1489	D_0__Eukaryota	D_1__SAR	D_2__Stramenopiles	D_3__Ochrophyta	D_4__Chrysophyceae											0.90691
89aebbbb5ff70668546c7e4c2cf2781b	OTU_1490	D_0__Eukaryota															1
27533016101cd23d0aad9de1dddd4bd5	OTU_1491	D_0__Eukaryota	D_1__SAR	D_2__Rhizaria	D_3__Retaria	D_4__Foraminifera	D_5__Globothalamea	D_6__Rotaliida									1
9e8ce6243f070e5508fe8585b18ee7d2	OTU_1492	D_0__Eukaryota	D_1__Opisthokonta	D_2__Holozoa	D_3__Metazoa (Animalia)	D_4__Eumetazoa	D_5__Bilateria	D_6__Mollusca	D_7__Bivalvia	D_8__Heteroconchia	D_9__Veneroida	D_10__Phaxas pellucidus	D_11__	D_12__	D_13__	D_14__	0.999901
b96b70f3bd80cf5f6e60d9f755eb7015	OTU_1493	D_0__Eukaryota	D_1__Archaeplastida	D_2__Rhodophyceae	D_3__Florideophycidae	D_4__Rhodymeniophycidae											0.999917
369f70dab928ca37381a71be62b836f6	OTU_1494	D_0__Eukaryota	D_1__Opisthokonta	D_2__Holozoa	D_3__Metazoa (Animalia)	D_4__Eumetazoa	D_5__Bilateria	D_6__Chordata	D_7__Vertebrata	D_8__Gnathostomata	D_9__Euteleostomi	D_10__Actinopterygii	D_11__Neopterygii	D_12__Teleostei			0.960791
ce657b37ef888d12eacfd6991bcd0e47	OTU_1495	D_0__Eukaryota	D_1__SAR	D_2__Alveolata													0.958097
bb1867a32a24173c3d83ed49bfc17dd9	OTU_1496	D_0__Eukaryota	D_1__SAR	D_2__Stramenopiles	D_3__Ochrophyta	D_4__Diatomea	D_5__Bacillariophytina	D_6__Bacillariophyceae									0.879669
62ca7ceab8121fcbc31841bcf59317a0	OTU_1497	D_0__Eukaryota	D_1__Archaeplastida	D_2__Chloroplastida	D_3__Chlorophyta	D_4__Clade VII	D_5__Subclade A	D_6__uncultured Chlorophyta	D_7__	D_8__	D_9__	D_10__	D_11__	D_12__	D_13__	D_14__	1
51efb612b045f33a3beed1ceca359427	OTU_1498	D_0__Eukaryota	D_1__Opisthokonta	D_2__Holozoa	D_3__Choanoflagellida	D_4__Acanthoecida	D_5__Stephanoecidae	D_6__Marine Choanoflagellates 1	D_7__uncultured eukaryote	D_8__	D_9__	D_10__	D_11__	D_12__	D_13__	D_14__	0.731759
fbd09e48ac16b4b56ad499292c370ae4	OTU_1499	D_0__Eukaryota	D_1__SAR	D_2__Alveolata	D_3__Protalveolata	D_4__Syndiniales											0.805311
786163ec7d5f95f460e92bb9a0fdb00b	OTU_1500	D_0__Eukaryota															1
b342b65524c853057781973d45df2b9c	OTU_1501	D_0__Eukaryota	D_1__Excavata	D_2__Discoba	D_3__Discicristata	D_4__Euglenozoa	D_5__Euglenida	D_6__Euglenophyceae	D_7__Euglenea								0.844926
1a54e3453da49241cf8f5ff46ac8e05f	OTU_1502	D_0__Eukaryota	D_1__Opisthokonta	D_2__Holozoa	D_3__Metazoa (Animalia)	D_4__Eumetazoa	D_5__Bilateria	D_6__Arthropoda	D_7__Crustacea	D_8__Malacostraca	D_9__Eumalacostraca	D_10__Eucarida	D_11__Enoplometopus macrodontus	D_12__	D_13__	D_14__	0.999309
ceede3c878731c2a2cc84db13b7763d5	OTU_1503	D_0__Eukaryota															1
939d4231d589637b863a7f839e8fff87	OTU_1504	D_0__Eukaryota															1
b35f80e8f66ab2542e022ab35e9ff227	OTU_1505	D_0__Eukaryota	D_1__SAR	D_2__Alveolata	D_3__Ciliophora	D_4__Intramacronucleata	D_5__Conthreep	D_6__Oligohymenophorea	D_7__Scuticociliatia	D_8__Metanophrys	D_9__Metanophrys sinensis	D_10__	D_11__	D_12__	D_13__	D_14__	0.999922
4bbd74201eecb89e4ad1ea357da01d39	OTU_1506	D_0__Eukaryota	D_1__Opisthokonta														0.949956
b92432be5c8f158994bf377ff6efa6a6	OTU_1507	D_0__Eukaryota	D_1__Opisthokonta	D_2__Holozoa	D_3__Metazoa (Animalia)	D_4__Porifera	D_5__Demospongiae	D_6__Clionaida	D_7__Spirastrella sp. SPS.1	D_8__	D_9__	D_10__	D_11__	D_12__	D_13__	D_14__	0.999997
298dd8beb6c90806cce373401ec777c2	OTU_1508	D_0__Eukaryota	D_1__Opisthokonta	D_2__Nucletmycea	D_3__Fungi	D_4__Mucoromycota	D_5__Glomeromycotina	D_6__Glomeromycetes									0.723432
65df0063dd93faba38822607356ca0b8	OTU_1509	D_0__Eukaryota	D_1__Opisthokonta	D_2__Holozoa	D_3__Metazoa (Animalia)	D_4__Eumetazoa	D_5__Bilateria										0.95859
8fa42dfc5b82d3da0aed08330d76c41b	OTU_1510	D_0__Eukaryota	D_1__Opisthokonta	D_2__Holozoa	D_3__Metazoa (Animalia)	D_4__Eumetazoa	D_5__Bilateria										0.978657
096a1d49202b4f615af5a9b94383e45c	OTU_1511	D_0__Eukaryota	D_1__SAR	D_2__Stramenopiles													0.955392
a1b53bcd738ccb4880bbb76f5c0c5c63	OTU_1512	D_0__Eukaryota	D_1__Opisthokonta	D_2__Holozoa	D_3__Metazoa (Animalia)	D_4__Eumetazoa	D_5__Bilateria	D_6__Arthropoda	D_7__Crustacea	D_8__Maxillopoda	D_9__Copepoda	D_10__Harpacticoida					0.89723
eaad14f2789d5dc5178191915c1aa96d	OTU_1513	D_0__Eukaryota	D_1__Opisthokonta	D_2__Holozoa	D_3__Metazoa (Animalia)	D_4__Eumetazoa	D_5__Bilateria	D_6__Arthropoda	D_7__Crustacea	D_8__Maxillopoda	D_9__Copepoda	D_10__Harpacticoida					0.70828
82d3228dd88c3d28e14e967fda635744	OTU_1514	D_0__Eukaryota	D_1__SAR	D_2__Rhizaria	D_3__Retaria	D_4__Acantharia	D_5__Arthracanthida	D_6__Hexaconus	D_7__Hexaconus serratus	D_8__	D_9__	D_10__	D_11__	D_12__	D_13__	D_14__	0.999927
44994178bf0b22534e49efb7997dcaa4	OTU_1515	D_0__Eukaryota	D_1__Opisthokonta	D_2__Nucletmycea	D_3__Fungi	D_4__Dikarya	D_5__Basidiomycota	D_6__Agaricomycotina	D_7__Tremellomycetes	D_8__Tremellales	D_9__Tremellaceae	D_10__Tremella	D_11__Tremella indecorata	D_12__	D_13__	D_14__	0.732572
a587823f8048273f485b2c50c48e47fc	OTU_1516	D_0__Eukaryota	D_1__SAR	D_2__Alveolata	D_3__Protalveolata	D_4__Syndiniales	D_5__Syndiniales Group I	D_6__uncultured marine eukaryote	D_7__	D_8__	D_9__	D_10__	D_11__	D_12__	D_13__	D_14__	0.990456
89d5e60cb20d037e96dab243ba006262	OTU_1517	D_0__Eukaryota	D_1__SAR														0.730736
991e26e77465cd1ec30bb9c4770a310f	OTU_1518	D_0__Eukaryota															1
b5414d6dc93cea8d8aa899d0d9aa7f93	OTU_1519	D_0__Eukaryota	D_1__SAR	D_2__Alveolata	D_3__Dinoflagellata	D_4__Dinophyceae											0.939866
9fae18d06775b7c4b1d71c5eacfe5043	OTU_1520	D_0__Eukaryota															1
d90a2245ad85d98f7e65cedb26c08036	OTU_1521	D_0__Eukaryota															1
93c5b0cd91f5a9260e4f635870c77a71	OTU_1522	D_0__Eukaryota	D_1__Opisthokonta														0.7025
445ed0e7adce1f1688248a8e700d4374	OTU_1523	D_0__Eukaryota	D_1__SAR	D_2__Stramenopiles	D_3__Ochrophyta	D_4__Chrysophyceae	D_5__uncultured	D_6__uncultured stramenopile	D_7__	D_8__	D_9__	D_10__	D_11__	D_12__	D_13__	D_14__	0.999573
a639bc9228bbd0ebc1ac9b8bcf6b330f	OTU_1524	D_0__Eukaryota	D_1__Opisthokonta	D_2__Holozoa	D_3__Metazoa (Animalia)	D_4__Eumetazoa	D_5__Bilateria	D_6__Arthropoda	D_7__Crustacea	D_8__Maxillopoda	D_9__Copepoda						0.997681
afaa3705b5a4d86604b2721e5856cbdc	OTU_1525	D_0__Eukaryota	D_1__Opisthokonta	D_2__Nucletmycea	D_3__Fungi	D_4__Dikarya	D_5__Ascomycota	D_6__Pezizomycotina	D_7__Eurotiomycetes	D_8__Eurotiales	D_9__Aspergillaceae	D_10__Penicillium					0.999793
a5c657f6e46b3d3bd1289a3b9326114e	OTU_1526	D_0__Eukaryota	D_1__SAR	D_2__Alveolata	D_3__Dinoflagellata	D_4__Dinophyceae											0.917483
dd55d3f7528ef13bb0cb41cd5cd531be	OTU_1527	D_0__Eukaryota	D_1__Opisthokonta	D_2__Holozoa	D_3__Metazoa (Animalia)	D_4__Eumetazoa	D_5__Bilateria										0.924591
21d6edae3ed4794ebdc3e8b67da82fd6	OTU_1528	D_0__Eukaryota	D_1__SAR	D_2__Alveolata	D_3__Dinoflagellata												0.795997
e1b915db3744e8ad5acbf0ee043b5028	OTU_1529	D_0__Eukaryota	D_1__Opisthokonta	D_2__Holozoa	D_3__Metazoa (Animalia)	D_4__Eumetazoa	D_5__Bilateria	D_6__Arthropoda									0.994704
70eeb30e064bd8cfa228a7561a062fbe	OTU_1530	D_0__Eukaryota	D_1__SAR	D_2__Stramenopiles	D_3__Ochrophyta	D_4__Chrysophyceae	D_5__uncultured	D_6__uncultured marine eukaryote	D_7__	D_8__	D_9__	D_10__	D_11__	D_12__	D_13__	D_14__	0.78441
818bdae4dc392dfb8b566d05c4d84401	OTU_1531	D_0__Eukaryota															1
b3595f40be3123076d085e783ea870cc	OTU_1532	D_0__Eukaryota															1
d4deeb72b5775157a8a78a1188b5b8d3	OTU_1533	D_0__Eukaryota	D_1__SAR	D_2__Alveolata	D_3__Dinoflagellata	D_4__Dinophyceae											0.722445
4e429fc7d4d3ff05de1f40a91051e6b8	OTU_1534	D_0__Eukaryota															1
6e01baff38dc8d3ba5af75bc73e81f15	OTU_1535	D_0__Eukaryota	D_1__SAR														0.737367
0435cd46c0906b71229e88153dc0849f	OTU_1536	D_0__Eukaryota	D_1__Opisthokonta	D_2__Holozoa	D_3__Metazoa (Animalia)	D_4__Eumetazoa	D_5__Bilateria	D_6__Arthropoda	D_7__Crustacea	D_8__Maxillopoda	D_9__Copepoda						0.997502
44d9362ddc6cb1a6b31a1784a350f078	OTU_1537	D_0__Eukaryota	D_1__Excavata	D_2__Discoba	D_3__Discicristata	D_4__Euglenozoa	D_5__Euglenida	D_6__Heteronematina	D_7__Petalomonas	D_8__uncultured eukaryote	D_9__	D_10__	D_11__	D_12__	D_13__	D_14__	0.999782
6ab6143be8e70f75eef87a04f8f0e3c9	OTU_1538	D_0__Eukaryota	D_1__Haptophyta	D_2__Prymnesiophyceae	D_3__Prymnesiales	D_4__Chrysochromulina	D_5__Chrysochromulina campanulifera	D_6__	D_7__	D_8__	D_9__	D_10__	D_11__	D_12__	D_13__	D_14__	0.998214
ac4cc5d22d76a45be5d565b30d80a674	OTU_1539	D_0__Eukaryota	D_1__Centrohelida	D_2__uncultured eukaryote	D_3__	D_4__	D_5__	D_6__	D_7__	D_8__	D_9__	D_10__	D_11__	D_12__	D_13__	D_14__	0.963999
6b57f8c0c1c145103d85d62646a6916e	OTU_1540	D_0__Eukaryota															1
b551a3062917c1291f59cb2a20b45f43	OTU_1541	D_0__Eukaryota	D_1__Opisthokonta	D_2__Holozoa	D_3__Metazoa (Animalia)	D_4__Eumetazoa	D_5__Bilateria										0.956794
77193243196e68a5fbfc70958f35660d	OTU_1542	D_0__Eukaryota	D_1__SAR	D_2__Alveolata	D_3__Dinoflagellata	D_4__Dinophyceae											0.868086
43a1abc2d4ea121ed38363cbcc6bd2d6	OTU_1543	D_0__Eukaryota	D_1__SAR	D_2__Stramenopiles	D_3__Ochrophyta												0.715346
645443cfce9e86e46d049c4030c29894	OTU_1544	D_0__Eukaryota	D_1__Opisthokonta	D_2__Holozoa	D_3__Metazoa (Animalia)	D_4__Porifera	D_5__Demospongiae	D_6__Haplosclerida	D_7__Haliclona amboinensis	D_8__	D_9__	D_10__	D_11__	D_12__	D_13__	D_14__	1
42ad94632f7fb89d106fb4a088da393f	OTU_1545	D_0__Eukaryota	D_1__Opisthokonta	D_2__Holozoa	D_3__Metazoa (Animalia)	D_4__Eumetazoa	D_5__Bilateria	D_6__Xenacoelomorpha	D_7__Acoelomorpha	D_8__Acoela							0.94651
140a83a8515afaee34df9a57165c1b0b	OTU_1546	D_0__Eukaryota	D_1__SAR	D_2__Alveolata	D_3__Ciliophora	D_4__Intramacronucleata	D_5__Spirotrichea	D_6__Oligotrichia	D_7__Spirotontonia	D_8__uncultured eukaryote	D_9__	D_10__	D_11__	D_12__	D_13__	D_14__	0.985595
4b229456dc8025c8986f924fafd19465	OTU_1547	D_0__Eukaryota	D_1__SAR	D_2__Rhizaria	D_3__Retaria	D_4__uncultured											0.989473
9955f0af444b8b620fc2279d7ccf9c08	OTU_1548	D_0__Eukaryota	D_1__Excavata	D_2__Discoba	D_3__Discicristata	D_4__Euglenozoa											0.911719
33423a95e241c37c6fd1b114ce1fe204	OTU_1549	D_0__Eukaryota	D_1__Excavata	D_2__Discoba	D_3__Discicristata	D_4__Euglenozoa											0.851844
0e893327ab971f7e51f34bcc778ca13a	OTU_1550	D_0__Eukaryota	D_1__SAR	D_2__Rhizaria	D_3__Retaria	D_4__Foraminifera	D_5__Globothalamea	D_6__Rotaliida									1
d4ed3d4427a84294f4ee7bae52686a35	OTU_1551	D_0__Eukaryota	D_1__Opisthokonta	D_2__Holozoa	D_3__Metazoa (Animalia)	D_4__Eumetazoa	D_5__Bilateria	D_6__Annelida	D_7__Polychaeta	D_8__Palpata	D_9__Phyllodocida						0.997572
f3e7a81c3518830784e8de6186f1b427	OTU_1552	D_0__Eukaryota															1
663450051edd4568eb07e94f2fd0d96a	OTU_1553	D_0__Eukaryota	D_1__Opisthokonta	D_2__Holozoa	D_3__Metazoa (Animalia)	D_4__Eumetazoa	D_5__Bilateria	D_6__Annelida	D_7__Polychaeta	D_8__Scolecida	D_9__Terebellida						0.973657
5164568e72928e1aa0262b90e837f84e	OTU_1554	D_0__Eukaryota	D_1__SAR	D_2__Stramenopiles	D_3__Labyrinthulomycetes												0.827802
22b191ea6ffb0c516b98d8c25d9f0c97	OTU_1555	D_0__Eukaryota															1
f8473d8a7a91317e0ebb388bad6d6bfe	OTU_1556	D_0__Eukaryota															1
f495e3b50ba4c1fe5ceac71356c50856	OTU_1557	D_0__Eukaryota	D_1__Opisthokonta	D_2__Holozoa	D_3__Metazoa (Animalia)	D_4__Eumetazoa	D_5__Bilateria	D_6__Annelida	D_7__Polychaeta	D_8__Scolecida	D_9__Capitellida						0.792543
d195ff1e7dcde67b72d1f5069070cea0	OTU_1558	D_0__Eukaryota	D_1__Picozoa	D_2__Picomonadida	D_3__Picomonadidae	D_4__Picomonas	D_5__uncultured eukaryote	D_6__	D_7__	D_8__	D_9__	D_10__	D_11__	D_12__	D_13__	D_14__	0.838365
55bb5bc8b41bf6c0a8cf9b1dac1e8dfa	OTU_1559	D_0__Eukaryota	D_1__Opisthokonta	D_2__Holozoa	D_3__Metazoa (Animalia)	D_4__Eumetazoa	D_5__Bilateria	D_6__Arthropoda									0.998693
74832ca6149d286b9ccba65d60b40d4b	OTU_1560	D_0__Eukaryota	D_1__SAR	D_2__Alveolata													0.992493
2eaba8e4d376b735beaa45a535d29773	OTU_1561	D_0__Eukaryota															1
c7bde53081d1ded5c0a8f67867cb6c3e	OTU_1562	D_0__Eukaryota	D_1__SAR	D_2__Alveolata	D_3__Protalveolata	D_4__Syndiniales	D_5__Syndiniales Group III	D_6__uncultured eukaryote	D_7__	D_8__	D_9__	D_10__	D_11__	D_12__	D_13__	D_14__	0.831445
4fca5fa45750081eac9321d66218b0e2	OTU_1563	D_0__Eukaryota	D_1__SAR	D_2__Stramenopiles	D_3__Ochrophyta	D_4__Diatomea	D_5__Bacillariophytina	D_6__Mediophyceae									0.865894
71cf4c34f13d2a7e78a912e99d02ed82	OTU_1564	D_0__Eukaryota															1
4fa7e3c1341a8fe589b18f6305293003	OTU_1565	D_0__Eukaryota	D_1__Opisthokonta	D_2__Nucletmycea	D_3__Fungi	D_4__Dikarya	D_5__Ascomycota	D_6__Pezizomycotina	D_7__Eurotiomycetes	D_8__Chaetothyriales	D_9__Trichomeriaceae	D_10__Knufia	D_11__Herpotrichiellaceae sp. UM238	D_12__	D_13__	D_14__	0.994848
c5e9c639b8b74ebcf43cf0eb575ffa13	OTU_1566	D_0__Eukaryota															1
9ac35e77d71928383d5be7dece96bf7d	OTU_1567	D_0__Eukaryota	D_1__SAR	D_2__Stramenopiles	D_3__Ochrophyta	D_4__Diatomea	D_5__Bacillariophytina	D_6__Bacillariophyceae									0.965785
4df42d563ee0ad3b1e89bfeade0b6b1e	OTU_1568	D_0__Eukaryota															1
1be9d679cff958acbd28b22f2c975ee2	OTU_1569	D_0__Eukaryota															1
ce64fe733af92904d21e5c188ac4fbeb	OTU_1570	D_0__Eukaryota															1
dcb447a286f88dca9437107ef2d45f10	OTU_1571	D_0__Eukaryota															1
d08a5b862d1b9e492a91577fc3a51b71	OTU_1572	D_0__Eukaryota															1
e03ebf45742a2d0e38c5da44ee4f6bb4	OTU_1573	D_0__Eukaryota	D_1__SAR	D_2__Rhizaria	D_3__Cercozoa	D_4__uncultured	D_5__Uncultured Cercozoa	D_6__	D_7__	D_8__	D_9__	D_10__	D_11__	D_12__	D_13__	D_14__	0.998309
3d9180776db0d44d4701b79c42fb4e61	OTU_1574	D_0__Eukaryota	D_1__SAR	D_2__Stramenopiles	D_3__Ochrophyta	D_4__Diatomea	D_5__Bacillariophytina	D_6__Bacillariophyceae	D_7__Pleurosigma	D_8__uncultured marine eukaryote	D_9__	D_10__	D_11__	D_12__	D_13__	D_14__	0.911807
21ffa21e403ea4abe30d90ea467704e7	OTU_1575	D_0__Eukaryota															1
4d6c01c351646f0dd0c61f5fbfd93358	OTU_1576	D_0__Eukaryota	D_1__SAR	D_2__Alveolata	D_3__Protalveolata	D_4__Syndiniales	D_5__Syndiniales Group II	D_6__uncultured eukaryote	D_7__	D_8__	D_9__	D_10__	D_11__	D_12__	D_13__	D_14__	0.950265
99f8128dc473f13b5922fce79f6b1fbe	OTU_1577	D_0__Eukaryota	D_1__SAR	D_2__Stramenopiles	D_3__Ochrophyta	D_4__Diatomea	D_5__Bacillariophytina	D_6__Bacillariophyceae									0.968546
bc0b4f7831f9f1ca091f2abd5db7c98d	OTU_1578	D_0__Eukaryota	D_1__SAR	D_2__Alveolata	D_3__Protalveolata	D_4__Syndiniales	D_5__Amoebophrya										0.994712
6cc2ee646f02b72f3adde1ebf93499ce	OTU_1579	D_0__Eukaryota															1
bcc7b43c7ea1ac55bcbddbe33f603de6	OTU_1580	D_0__Eukaryota	D_1__Opisthokonta	D_2__Holozoa	D_3__Metazoa (Animalia)	D_4__Eumetazoa	D_5__Bilateria	D_6__Annelida	D_7__Polychaeta	D_8__Scolecida							0.74268
8333ef2b3186dc93c3deef092f7eecc7	OTU_1581	D_0__Eukaryota	D_1__Opisthokonta	D_2__Holozoa	D_3__Metazoa (Animalia)	D_4__Porifera	D_5__Demospongiae	D_6__Suberitida	D_7__Terpios aploos	D_8__	D_9__	D_10__	D_11__	D_12__	D_13__	D_14__	0.943522
67edf4c27ee6c5010536a150b4137607	OTU_1582	D_0__Eukaryota	D_1__SAR	D_2__Rhizaria	D_3__Retaria	D_4__Acantharia											0.997001
f095598ba6bc7b5463bbfb3a41da87ca	OTU_1583	D_0__Eukaryota															1
a7ce8bd259ec62e16e0431b8bbecb0cc	OTU_1584	D_0__Eukaryota	D_1__Cryptophyceae	D_2__Cryptomonadales	D_3__uncultured eukaryote	D_4__	D_5__	D_6__	D_7__	D_8__	D_9__	D_10__	D_11__	D_12__	D_13__	D_14__	1
03c0048e76c733ca5c265340daf100c5	OTU_1585	D_0__Eukaryota	D_1__Opisthokonta	D_2__Holozoa	D_3__Metazoa (Animalia)	D_4__Porifera	D_5__Demospongiae	D_6__Clionaida	D_7__Spirastrella sp. SPS.1	D_8__	D_9__	D_10__	D_11__	D_12__	D_13__	D_14__	0.999998
ca6ccc8767aad62bd011169a8e02f34f	OTU_1586	D_0__Eukaryota	D_1__SAR	D_2__Alveolata	D_3__Protalveolata	D_4__Syndiniales	D_5__Syndiniales Group I	D_6__uncultured eukaryote	D_7__	D_8__	D_9__	D_10__	D_11__	D_12__	D_13__	D_14__	0.907233
161adbce1227c7510ad340d25a34c2a0	OTU_1587	D_0__Eukaryota	D_1__SAR	D_2__Alveolata	D_3__Protalveolata	D_4__Syndiniales	D_5__Syndiniales Group I										0.970441
8084286691d6955c41fd8dad7fa8fe33	OTU_1588	D_0__Eukaryota	D_1__Excavata	D_2__Discoba	D_3__Discicristata	D_4__Euglenozoa	D_5__Kinetoplastea	D_6__Metakinetoplastina	D_7__Neobodonida	D_8__Neobodo	D_9__uncultured eukaryote	D_10__	D_11__	D_12__	D_13__	D_14__	0.705746
ac9cd0e787534bc0e6de65afedba887a	OTU_1589	D_0__Eukaryota	D_1__Opisthokonta	D_2__Holozoa	D_3__Metazoa (Animalia)	D_4__Porifera	D_5__Demospongiae	D_6__Suberitida	D_7__Terpios aploos	D_8__	D_9__	D_10__	D_11__	D_12__	D_13__	D_14__	0.979452
6f9fae6d05ba9d487c3de6342c9c26ca	OTU_1590	D_0__Eukaryota															1
1cc5621f1b6ee7313b82118ee2a6291d	OTU_1591	D_0__Eukaryota	D_1__Opisthokonta	D_2__Holozoa	D_3__Metazoa (Animalia)	D_4__Eumetazoa	D_5__Bilateria	D_6__Xenacoelomorpha	D_7__Acoelomorpha	D_8__Acoela							0.946505
e6a6faaabf720ae3ad2d2423110664e2	OTU_1592	D_0__Eukaryota	D_1__SAR	D_2__Alveolata	D_3__Dinoflagellata	D_4__Dinophyceae	D_5__uncultured	D_6__uncultured eukaryote	D_7__	D_8__	D_9__	D_10__	D_11__	D_12__	D_13__	D_14__	0.754541
a4d39399d51ed736395bab5510c8b9c2	OTU_1593	D_0__Eukaryota	D_1__SAR	D_2__Stramenopiles	D_3__MAST-3	D_4__MAST-3J	D_5__uncultured eukaryote	D_6__	D_7__	D_8__	D_9__	D_10__	D_11__	D_12__	D_13__	D_14__	0.922089
880aa5c4645660d2a4021d930601ec14	OTU_1594	D_0__Eukaryota	D_1__SAR	D_2__Stramenopiles	D_3__Ochrophyta	D_4__Diatomea	D_5__Bacillariophytina	D_6__Bacillariophyceae									0.99709
308bf7d947fffbbf1427ed37f53bc4b9	OTU_1595	D_0__Eukaryota	D_1__SAR	D_2__Alveolata	D_3__Protalveolata	D_4__Syndiniales	D_5__Syndiniales Group II	D_6__uncultured eukaryote	D_7__	D_8__	D_9__	D_10__	D_11__	D_12__	D_13__	D_14__	0.883844
d6c167c8a58dd66d23b880ad143aec07	OTU_1596	D_0__Eukaryota	D_1__Opisthokonta	D_2__Holozoa	D_3__Metazoa (Animalia)	D_4__Eumetazoa	D_5__Bilateria	D_6__Chordata	D_7__Tunicata	D_8__Ascidiacea	D_9__Stolidobranchia	D_10__Styela gibbsii	D_11__	D_12__	D_13__	D_14__	0.898464
bf037355f122eca4d796c05d711590eb	OTU_1597	D_0__Eukaryota	D_1__SAR	D_2__Stramenopiles	D_3__Ochrophyta	D_4__Diatomea	D_5__Bacillariophytina	D_6__Bacillariophyceae									0.895913
bfd9a7eecb9ce113e3e17e12d509ade9	OTU_1598	D_0__Eukaryota	D_1__SAR	D_2__Stramenopiles	D_3__Ochrophyta	D_4__Diatomea	D_5__Bacillariophytina	D_6__Mediophyceae	D_7__Chaetoceros	D_8__Chaetoceros sp.	D_9__	D_10__	D_11__	D_12__	D_13__	D_14__	0.884209
a0a95037bec04a80b60290e70aa343e6	OTU_1599	D_0__Eukaryota															1
af415e311ed047eb4fee5a08e4faaa15	OTU_1600	D_0__Eukaryota	D_1__SAR	D_2__Alveolata	D_3__Protalveolata	D_4__Syndiniales	D_5__Syndiniales Group II	D_6__uncultured eukaryote	D_7__	D_8__	D_9__	D_10__	D_11__	D_12__	D_13__	D_14__	0.876434
31970b0bbb7ebcc64db5413985f11efb	OTU_1601	D_0__Eukaryota	D_1__Opisthokonta	D_2__Holozoa	D_3__Metazoa (Animalia)	D_4__Porifera	D_5__Demospongiae	D_6__Suberitida	D_7__Terpios aploos	D_8__	D_9__	D_10__	D_11__	D_12__	D_13__	D_14__	0.999797
f04f15bddb145e7b13bfa5a98c92009f	OTU_1602	D_0__Eukaryota	D_1__Opisthokonta	D_2__Holozoa	D_3__Metazoa (Animalia)	D_4__Eumetazoa	D_5__Cnidaria	D_6__Anthozoa	D_7__Hexacorallia	D_8__Corallimorpharia	D_9__Corynactis viridis	D_10__	D_11__	D_12__	D_13__	D_14__	0.976092
d989aed48b909fe5f985d0e75e6ffbb8	OTU_1603	D_0__Eukaryota	D_1__Opisthokonta	D_2__Holozoa	D_3__Metazoa (Animalia)	D_4__Eumetazoa	D_5__Bilateria										0.715573
b744903ffc524b16398336e98ee989ce	OTU_1604	D_0__Eukaryota	D_1__SAR	D_2__Alveolata													0.997671
497c26748b2cb2260ac59ab9dc25b7bb	OTU_1605	D_0__Eukaryota	D_1__Opisthokonta	D_2__Holozoa	D_3__Metazoa (Animalia)	D_4__Porifera	D_5__Demospongiae	D_6__Haplosclerida	D_7__Haliclona fascigera	D_8__	D_9__	D_10__	D_11__	D_12__	D_13__	D_14__	0.968972
f0a29c976bac21594aa76c95c980bad9	OTU_1606	D_0__Eukaryota															1
89cb22d5f82256288b8882cd7cb40b28	OTU_1607	D_0__Eukaryota	D_1__SAR	D_2__Alveolata	D_3__Dinoflagellata	D_4__Dinophyceae	D_5__Gymnodiniphycidae	D_6__Incertae Sedis	D_7__Cochlodinium	D_8__uncultured eukaryote	D_9__	D_10__	D_11__	D_12__	D_13__	D_14__	0.987288
519c39b4755f4cd6685aafde8b4d652d	OTU_1608	D_0__Eukaryota															1
e07d42223d3499dde907a677c625df22	OTU_1609	D_0__Eukaryota															1
561e77cd34e378d93fa847bacf57b34a	OTU_1610	D_0__Eukaryota															1
4062a870ec66848dbaee5541e82b2b6d	OTU_1611	D_0__Eukaryota	D_1__Opisthokonta	D_2__Holozoa	D_3__Metazoa (Animalia)	D_4__Eumetazoa											0.711826
9e037e0d4bbd0b9b7b49195f80a79be3	OTU_1612	D_0__Eukaryota	D_1__Archaeplastida	D_2__Chloroplastida	D_3__Chlorophyta	D_4__Chlorodendrophyceae	D_5__Chlorodendrales	D_6__Tetraselmis	D_7__Tetraselmis chuii	D_8__	D_9__	D_10__	D_11__	D_12__	D_13__	D_14__	0.725051
d934a3cbef228dd45a868c7db7d43ba7	OTU_1613	D_0__Eukaryota	D_1__SAR	D_2__Stramenopiles	D_3__Ochrophyta	D_4__Bolidomonas	D_5__Bolidomonas pacifica	D_6__	D_7__	D_8__	D_9__	D_10__	D_11__	D_12__	D_13__	D_14__	1
119f43c89d0882ee361776859d4dd80f	OTU_1614	D_0__Eukaryota	D_1__SAR	D_2__Alveolata	D_3__Ciliophora	D_4__Intramacronucleata	D_5__Spirotrichea	D_6__Licnophoria	D_7__Licnophora	D_8__Licnophora lyngbycola	D_9__	D_10__	D_11__	D_12__	D_13__	D_14__	1
88bcd7ed478fb5878c5dd3d81bf7d9d4	OTU_1615	D_0__Eukaryota	D_1__SAR	D_2__Stramenopiles	D_3__Ochrophyta	D_4__Diatomea	D_5__Bacillariophytina	D_6__Bacillariophyceae									0.854405
8fa4cfdac6e494c18fada38fcf71251c	OTU_1616	D_0__Eukaryota	D_1__Opisthokonta	D_2__Holozoa	D_3__Metazoa (Animalia)	D_4__Eumetazoa	D_5__Bilateria	D_6__Xenacoelomorpha	D_7__Acoelomorpha	D_8__Acoela	D_9__Simplicomorpha gigantorhabditis	D_10__	D_11__	D_12__	D_13__	D_14__	1
b37fbf958aaf7c400dad3d9c46ddb08c	OTU_1617	D_0__Eukaryota	D_1__SAR	D_2__Stramenopiles	D_3__Ochrophyta	D_4__Diatomea	D_5__Bacillariophytina	D_6__Bacillariophyceae									0.982129
babe2ecd8d812765056a1e96623ccf32	OTU_1618	D_0__Eukaryota	D_1__SAR	D_2__Alveolata	D_3__Protalveolata	D_4__Syndiniales	D_5__Syndiniales Group II	D_6__uncultured eukaryote	D_7__	D_8__	D_9__	D_10__	D_11__	D_12__	D_13__	D_14__	0.97888
24afeaea4d55cf07cc1c7af384240ae7	OTU_1619	D_0__Eukaryota	D_1__Opisthokonta	D_2__Holozoa													0.702804
9bf33114bb9a5a3fff51165ccb482d2f	OTU_1620	D_0__Eukaryota	D_1__Opisthokonta	D_2__Holozoa	D_3__Metazoa (Animalia)	D_4__Eumetazoa	D_5__Bilateria	D_6__Platyhelminthes	D_7__Rhabditophora	D_8__Rhabdocoela	D_9__Neodalyellida						0.741319
42ac7253a9876424d39833c69116c222	OTU_1621	D_0__Eukaryota															1
79118ffdf528cc5e3ff9f8bb554d4112	OTU_1622	D_0__Eukaryota															1
3831234da201950b5d758bd5af2d6a89	OTU_1623	D_0__Eukaryota															1
e506c75546144387f5a7ee8e44ad885b	OTU_1624	D_0__Eukaryota	D_1__SAR	D_2__Rhizaria	D_3__Retaria	D_4__Foraminifera	D_5__Globothalamea	D_6__Rotaliida									0.805215
256efd6afb83c39e3adcf78eabad2c55	OTU_1625	D_0__Eukaryota	D_1__Opisthokonta	D_2__Nucletmycea	D_3__Fungi	D_4__Dikarya	D_5__Basidiomycota	D_6__Agaricomycotina	D_7__Tremellomycetes	D_8__Trichosporonales	D_9__Trichosporonaceae	D_10__Vanrija	D_11__Vanrija humicola	D_12__	D_13__	D_14__	0.989384
617c924202291af45bd30e7c6a4b0c1f	OTU_1626	D_0__Eukaryota	D_1__SAR	D_2__Stramenopiles	D_3__Ochrophyta	D_4__Diatomea											0.961278
6ab3075ff1d309ecd269ea5f2c1b84e0	OTU_1627	D_0__Eukaryota	D_1__SAR	D_2__Alveolata	D_3__Protalveolata	D_4__Colpodellida	D_5__Voromonas	D_6__Voromonas pontica	D_7__	D_8__	D_9__	D_10__	D_11__	D_12__	D_13__	D_14__	1
d79f1877709bf52d61693f5ee2a66604	OTU_1628	D_0__Eukaryota	D_1__SAR	D_2__Alveolata	D_3__Protalveolata	D_4__Syndiniales	D_5__Syndiniales Group III	D_6__uncultured eukaryote	D_7__	D_8__	D_9__	D_10__	D_11__	D_12__	D_13__	D_14__	0.85292
2c0d3d12eaf07ecc64f3a7505d62c5c8	OTU_1629	D_0__Eukaryota	D_1__SAR	D_2__Alveolata	D_3__Dinoflagellata	D_4__Dinophyceae											0.904323
c16ae534d6edbd16115e553338c04306	OTU_1630	D_0__Eukaryota	D_1__Excavata	D_2__Discoba	D_3__Discicristata	D_4__Euglenozoa	D_5__Euglenida	D_6__Euglenophyceae	D_7__Euglenea								0.711626
8531b4c99762d216145f707c21c1f4ac	OTU_1631	D_0__Eukaryota	D_1__SAR	D_2__Alveolata	D_3__Ciliophora	D_4__Intramacronucleata	D_5__Spirotrichea	D_6__Choreotrichia	D_7__uncultured	D_8__uncultured eukaryote	D_9__	D_10__	D_11__	D_12__	D_13__	D_14__	0.999082
6b83684ba4fcad3110e1b0412d3d6910	OTU_1632	D_0__Eukaryota															1
70a2f6ca5132c83dccf140cacc455e30	OTU_1633	D_0__Eukaryota	D_1__SAR	D_2__Alveolata	D_3__Protalveolata	D_4__Syndiniales	D_5__Syndiniales Group II	D_6__uncultured eukaryote	D_7__	D_8__	D_9__	D_10__	D_11__	D_12__	D_13__	D_14__	0.777905
903abaf10770e96985b50bfb43ed2f7e	OTU_1634	D_0__Eukaryota	D_1__SAR	D_2__Alveolata													0.99622
ffbd79a09001b2fa4290154d71cc1e82	OTU_1635	D_0__Eukaryota	D_1__SAR	D_2__Alveolata													0.87394
97bb5e8dfb7d6ee4bf13ba2160db692d	OTU_1636	D_0__Eukaryota	D_1__SAR	D_2__Stramenopiles	D_3__Ochrophyta	D_4__Eustigmatophyceae	D_5__Eustigmatales	D_6__uncultured	D_7__uncultured eukaryote	D_8__	D_9__	D_10__	D_11__	D_12__	D_13__	D_14__	1
d2b27540fce64d37a91a5a74e10560a5	OTU_1637	D_0__Eukaryota	D_1__SAR	D_2__Alveolata													0.944026
ffbdae6ec78c4d479a4c9e1ff004e325	OTU_1638	D_0__Eukaryota															1
82801ec287aa0cd4fdebf2805210fa40	OTU_1639	D_0__Eukaryota	D_1__Opisthokonta	D_2__Holozoa	D_3__Metazoa (Animalia)	D_4__Eumetazoa	D_5__Cnidaria	D_6__Hydrozoa	D_7__Hydroidolina	D_8__Siphonophorae	D_9__uncultured eukaryote	D_10__	D_11__	D_12__	D_13__	D_14__	0.998952
e56e4c521fa0926a5984d09d00667b7e	OTU_1640	D_0__Eukaryota															1
e64f11d033bb75fd1171c16dd7cc892d	OTU_1641	D_0__Eukaryota	D_1__Haptophyta	D_2__Prymnesiophyceae	D_3__Prymnesiales												0.741907
486783b4cbcfdb66ef8a5c4b550683b7	OTU_1642	D_0__Eukaryota	D_1__SAR	D_2__Stramenopiles	D_3__MAST-7	D_4__uncultured eukaryote	D_5__	D_6__	D_7__	D_8__	D_9__	D_10__	D_11__	D_12__	D_13__	D_14__	0.998913
90410cc6852fb2308da203f3f424638f	OTU_1643	D_0__Eukaryota	D_1__SAR	D_2__Stramenopiles	D_3__Ochrophyta	D_4__Diatomea	D_5__Bacillariophytina	D_6__Bacillariophyceae									0.777196
6a42cb4b25fca9dab093c28ad03164e1	OTU_1644	D_0__Eukaryota	D_1__Opisthokonta	D_2__Holozoa	D_3__Metazoa (Animalia)	D_4__Eumetazoa	D_5__Bilateria	D_6__Arthropoda	D_7__Crustacea	D_8__Maxillopoda	D_9__Copepoda	D_10__Cyclopoida	D_11__Archinotodelphys sp. New Caledonia-RJH-2001	D_12__	D_13__	D_14__	0.715165
b5b23c0c9bd68c5ab4d21484b7d5fdc7	OTU_1645	D_0__Eukaryota	D_1__SAR	D_2__Stramenopiles													0.996908
8ecb598fb18ca017eae7a2f7b3f642e2	OTU_1646	D_0__Eukaryota	D_1__Opisthokonta	D_2__Holozoa	D_3__Metazoa (Animalia)	D_4__Eumetazoa	D_5__Bilateria	D_6__Arthropoda	D_7__Hexapoda	D_8__Insecta	D_9__Pterygota	D_10__Neoptera	D_11__Hymenoptera				0.97669
fdd0c74d890836efe72c4eee5a6dac6d	OTU_1647	D_0__Eukaryota															1
91ccade4137b44947c9a18c9e3265d45	OTU_1648	D_0__Eukaryota	D_1__SAR	D_2__Stramenopiles	D_3__Ochrophyta	D_4__Diatomea	D_5__Bacillariophytina										0.704247
cdbad1547931282974ac8edfff9aa51f	OTU_1649	D_0__Eukaryota	D_1__SAR	D_2__Stramenopiles	D_3__Labyrinthulomycetes	D_4__Thraustochytriaceae	D_5__Aplanochytrium	D_6__uncultured marine eukaryote	D_7__	D_8__	D_9__	D_10__	D_11__	D_12__	D_13__	D_14__	0.969049
0ced56cbd74afde92c329c5ac6a3603d	OTU_1650	D_0__Eukaryota	D_1__Opisthokonta	D_2__Holozoa	D_3__Metazoa (Animalia)												0.886484
c15c0c136f9360f4fd6b295039f7e4ec	OTU_1651	D_0__Eukaryota	D_1__SAR	D_2__Alveolata	D_3__Protalveolata	D_4__Syndiniales											0.710961
fa79e70362dbca6be18aa29bde7369f8	OTU_1652	D_0__Eukaryota															1
5a98452ff7139e100d02ea3e0f21b49c	OTU_1653	D_0__Eukaryota															1
b3a14624db9a60464dff20fdad9d1ba9	OTU_1654	D_0__Eukaryota															1
ee0099358d26055b2c572ea2605cdc05	OTU_1655	D_0__Eukaryota	D_1__Opisthokonta	D_2__Holozoa	D_3__Choanoflagellida	D_4__Acanthoecida	D_5__Stephanoecidae	D_6__Stephanoeca	D_7__uncultured eukaryote	D_8__	D_9__	D_10__	D_11__	D_12__	D_13__	D_14__	0.835057
f4983cdfaeae14deaf13e9bebbb0b8b6	OTU_1656	D_0__Eukaryota	D_1__SAR	D_2__Alveolata													0.98949
8f95ff2a43b4258b5296705f31939c7c	OTU_1657	D_0__Eukaryota	D_1__Incertae Sedis	D_2__Telonema	D_3__Telonema subtile	D_4__	D_5__	D_6__	D_7__	D_8__	D_9__	D_10__	D_11__	D_12__	D_13__	D_14__	0.782751
dd42704ea2739492062aa95e7f626492	OTU_1658	D_0__Eukaryota	D_1__Opisthokonta	D_2__Holozoa	D_3__Metazoa (Animalia)												0.789949
8427d5b716bf78b1cc5062ebb3bdbcbd	OTU_1659	D_0__Eukaryota	D_1__SAR	D_2__Alveolata	D_3__Dinoflagellata	D_4__Dinophyceae	D_5__Gymnodiniphycidae	D_6__Suessiaceae									0.999592
1482b730f122252af447dea49de012c3	OTU_1660	D_0__Eukaryota	D_1__Excavata	D_2__Discoba	D_3__Discicristata	D_4__Euglenozoa	D_5__Euglenida	D_6__Heteronematina	D_7__Petalomonas	D_8__Petalomonas cantuscygni	D_9__	D_10__	D_11__	D_12__	D_13__	D_14__	0.969469
5e7cce946b8ecdca351ffb514eb21ba9	OTU_1661	D_0__Eukaryota	D_1__SAR	D_2__Alveolata													0.97711
74b4da0c42ef24d7f9dc5b57099cc0b8	OTU_1662	D_0__Eukaryota	D_1__SAR	D_2__Rhizaria	D_3__Retaria	D_4__RAD B	D_5__uncultured marine Polycystinea	D_6__	D_7__	D_8__	D_9__	D_10__	D_11__	D_12__	D_13__	D_14__	0.998901
4db1c3717169c700981cc04f3347da59	OTU_1663	D_0__Eukaryota	D_1__SAR	D_2__Stramenopiles	D_3__Ochrophyta	D_4__Diatomea											0.999421
2ad56c0d7324d270635ce2be9ba95060	OTU_1664	D_0__Eukaryota	D_1__SAR	D_2__Stramenopiles													0.966613
2cc3a5d08bfd5c9459a925485e7fbcf9	OTU_1665	D_0__Eukaryota															1
63c454e34c8f4608745373c44ea6a718	OTU_1666	D_0__Eukaryota	D_1__SAR	D_2__Alveolata	D_3__Dinoflagellata	D_4__Dinophyceae	D_5__Gymnodiniphycidae	D_6__Incertae Sedis	D_7__Cochlodinium	D_8__uncultured eukaryote	D_9__	D_10__	D_11__	D_12__	D_13__	D_14__	0.999927
5d38af757e68c3f6862b74d632ea29fa	OTU_1667	D_0__Eukaryota															1
71cd6476c10e25437d98c5f3c7f1a7c0	OTU_1668	D_0__Eukaryota	D_1__SAR	D_2__Rhizaria	D_3__Retaria	D_4__Polycystinea	D_5__Spumellaria										0.730719
82b8378343e0b29d3585ae5edc79634b	OTU_1669	D_0__Eukaryota	D_1__Picozoa	D_2__Picomonadida	D_3__uncultured eukaryote	D_4__	D_5__	D_6__	D_7__	D_8__	D_9__	D_10__	D_11__	D_12__	D_13__	D_14__	0.997806
8e7298c0b5ea010b0cfabe54abf5e199	OTU_1670	D_0__Eukaryota	D_1__SAR	D_2__Alveolata	D_3__Apicomplexa	D_4__Conoidasida	D_5__Gregarinasina	D_6__Eugregarinorida									0.999757
c3528950c2f3b4152df534b31eca86ed	OTU_1671	D_0__Eukaryota	D_1__Opisthokonta	D_2__Holozoa	D_3__Metazoa (Animalia)	D_4__Eumetazoa											0.849188
0ac97092050a52c2d1e40cfaa839c5f6	OTU_1672	D_0__Eukaryota	D_1__SAR	D_2__Alveolata	D_3__Dinoflagellata	D_4__Dinophyceae	D_5__Prorocentrales	D_6__Prorocentrum	D_7__uncultured eukaryote	D_8__	D_9__	D_10__	D_11__	D_12__	D_13__	D_14__	0.732278
51924935dbf195a052f51f205bee25b4	OTU_1673	D_0__Eukaryota	D_1__Archaeplastida	D_2__Rhodophyceae	D_3__Florideophycidae	D_4__Rhodymeniophycidae	D_5__uncultured eukaryote	D_6__	D_7__	D_8__	D_9__	D_10__	D_11__	D_12__	D_13__	D_14__	0.999772
2b7021282d658b244616db4ecfdbf97e	OTU_1674	D_0__Eukaryota	D_1__SAR	D_2__Alveolata	D_3__Ciliophora	D_4__Intramacronucleata	D_5__Spirotrichea	D_6__Oligotrichia									0.922895
d8e22fc3d9d59623541bf25a3748e8fc	OTU_1675	D_0__Eukaryota	D_1__SAR	D_2__Alveolata	D_3__Ciliophora	D_4__Intramacronucleata	D_5__Spirotrichea	D_6__Oligotrichia	D_7__Spirotontonia	D_8__uncultured eukaryote	D_9__	D_10__	D_11__	D_12__	D_13__	D_14__	0.882443
17cd84c0ec5aaa89d31e74ab0c803478	OTU_1676	D_0__Eukaryota															1
2139851645f1e7526e60c5fc6db686fd	OTU_1677	D_0__Eukaryota	D_1__SAR	D_2__Alveolata	D_3__Dinoflagellata												0.703621
0f0594fdd72523b5f5b78ac29a400d28	OTU_1678	D_0__Eukaryota															1
906b6430bef3afb9f00768188fbb2ce6	OTU_1679	D_0__Eukaryota	D_1__SAR	D_2__Stramenopiles	D_3__Labyrinthulomycetes	D_4__uncultured	D_5__uncultured marine eukaryote	D_6__	D_7__	D_8__	D_9__	D_10__	D_11__	D_12__	D_13__	D_14__	0.939694
a03ec4d8e5a8ca7258c9faa8a7ff9df3	OTU_1680	D_0__Eukaryota	D_1__SAR	D_2__Stramenopiles													0.987308
809670fa58c5f391bf426487af51bac5	OTU_1681	D_0__Eukaryota															1
9b63109e7aa0a80cc9031365bead1853	OTU_1682	D_0__Eukaryota	D_1__SAR	D_2__Alveolata	D_3__Ciliophora	D_4__Intramacronucleata	D_5__Spirotrichea	D_6__Oligotrichia	D_7__Spirotontonia	D_8__uncultured marine eukaryote	D_9__	D_10__	D_11__	D_12__	D_13__	D_14__	0.746891
e0bce003d0ec09fcc1cf328bbdd41e27	OTU_1683	D_0__Eukaryota	D_1__SAR	D_2__Alveolata	D_3__Protalveolata	D_4__Syndiniales	D_5__Syndiniales Group I										0.998499
6a0a9993dad80620c1883a4b2b120aa9	OTU_1684	D_0__Eukaryota	D_1__SAR	D_2__Alveolata	D_3__Dinoflagellata	D_4__Dinophyceae	D_5__Gymnodiniphycidae	D_6__uncultured	D_7__uncultured marine eukaryote	D_8__	D_9__	D_10__	D_11__	D_12__	D_13__	D_14__	0.991973
e2f53f0f40ffced9513de640ba7d7e48	OTU_1685	D_0__Eukaryota	D_1__SAR	D_2__Alveolata	D_3__Protalveolata	D_4__Syndiniales											0.951989
2eaf7db9023fc6b4038db00a6dba04e9	OTU_1686	D_0__Eukaryota	D_1__SAR	D_2__Alveolata													0.989486
66c00c219c7d84b8bfaa39e6001934a3	OTU_1687	D_0__Eukaryota	D_1__SAR	D_2__Alveolata	D_3__Ciliophora	D_4__Intramacronucleata	D_5__Spirotrichea	D_6__Oligotrichia									0.996864
589d1fefc0d79bb2bdf320001280c7eb	OTU_1688	D_0__Eukaryota	D_1__SAR	D_2__Stramenopiles	D_3__Ochrophyta	D_4__Chrysophyceae											0.915434
f34c50be9f9139ac4b628d4a4344eda0	OTU_1689	D_0__Eukaryota	D_1__SAR	D_2__Alveolata	D_3__Ciliophora	D_4__Intramacronucleata	D_5__Spirotrichea	D_6__Oligotrichia	D_7__Pseudotontonia	D_8__uncultured eukaryote	D_9__	D_10__	D_11__	D_12__	D_13__	D_14__	0.811339
362d48434324c6f6ad6966e3146ce9d1	OTU_1690	D_0__Eukaryota															1
9461f632f01cff42825b48628ceab309	OTU_1691	D_0__Eukaryota	D_1__SAR	D_2__Alveolata	D_3__Dinoflagellata	D_4__Dinophyceae											0.888772
3e12e493a2a8d7b6813e7aeb82b0872e	OTU_1692	D_0__Eukaryota	D_1__SAR	D_2__Stramenopiles	D_3__Ochrophyta	D_4__Diatomea	D_5__Coscinodiscophytina	D_6__Melosirids	D_7__Melosira								0.999786
c48ace17415527400526b292d9f698e9	OTU_1693	D_0__Eukaryota															1
93769e3f42e1f2ab0777c52abd15ee41	OTU_1694	D_0__Eukaryota	D_1__Excavata	D_2__Discoba	D_3__Discicristata	D_4__Euglenozoa	D_5__Diplonemea	D_6__SCM38C39 marine group	D_7__uncultured eukaryote	D_8__	D_9__	D_10__	D_11__	D_12__	D_13__	D_14__	0.999746
36a7434e45e7065bc925e74fee9c1865	OTU_1695	D_0__Eukaryota	D_1__SAR	D_2__Stramenopiles	D_3__Labyrinthulomycetes	D_4__uncultured	D_5__Oblongichytrium sp. TN6	D_6__	D_7__	D_8__	D_9__	D_10__	D_11__	D_12__	D_13__	D_14__	0.990049
b6ad54bbdee7217259569f76dc8804ab	OTU_1696	D_0__Eukaryota	D_1__SAR	D_2__Rhizaria	D_3__Retaria	D_4__Polycystinea	D_5__Collodaria	D_6__Collozoum	D_7__marine metagenome	D_8__	D_9__	D_10__	D_11__	D_12__	D_13__	D_14__	0.907091
f307a7a76fa5632dc3b15cde91637b8e	OTU_1697	D_0__Eukaryota	D_1__Opisthokonta	D_2__Holozoa	D_3__Metazoa (Animalia)	D_4__Porifera	D_5__Demospongiae	D_6__Halichondria sp. HAS	D_7__	D_8__	D_9__	D_10__	D_11__	D_12__	D_13__	D_14__	0.994267
9bc9511979a537f436fa981de9660263	OTU_1698	D_0__Eukaryota	D_1__Opisthokonta	D_2__Holozoa	D_3__Metazoa (Animalia)	D_4__Porifera	D_5__Demospongiae	D_6__Axinellida	D_7__Axinella corrugata	D_8__	D_9__	D_10__	D_11__	D_12__	D_13__	D_14__	0.999999
c9c6a2f47ed03cd84f1c017d4f1b818c	OTU_1699	D_0__Eukaryota	D_1__SAR	D_2__Stramenopiles													0.998098
737658a4e12c338de25b8fb2e896e30f	OTU_1700	D_0__Eukaryota	D_1__Excavata	D_2__Discoba	D_3__Discicristata	D_4__Euglenozoa	D_5__Diplonemea	D_6__Diplonema	D_7__Diplonema sp. ATCC 50225	D_8__	D_9__	D_10__	D_11__	D_12__	D_13__	D_14__	0.840476
387cf5a691cf0c5b74c66fd0ef51fa51	OTU_1701	D_0__Eukaryota	D_1__Amoebozoa	D_2__Discosea	D_3__Flabellinia	D_4__Dactylopodida	D_5__Paramoeba	D_6__Paramoeba branchiphila	D_7__	D_8__	D_9__	D_10__	D_11__	D_12__	D_13__	D_14__	1
9d59597029352e3da8402a28c9d9295d	OTU_1702	D_0__Eukaryota	D_1__SAR	D_2__Alveolata	D_3__Dinoflagellata	D_4__Dinophyceae	D_5__Gymnodiniphycidae										0.739176
5b94e2dac0c497b38efeb966b3a09afb	OTU_1703	D_0__Eukaryota	D_1__SAR	D_2__Alveolata													0.847631
444c06e6015ccc0cc81749e937c578ae	OTU_1704	D_0__Eukaryota	D_1__SAR	D_2__Alveolata													0.960935
237d6b00a8e82994ffe2e55b434c12ca	OTU_1705	D_0__Eukaryota	D_1__SAR	D_2__Alveolata	D_3__Ciliophora	D_4__Intramacronucleata	D_5__Spirotrichea	D_6__Choreotrichia	D_7__Eutintinnus	D_8__uncultured Tintinnida	D_9__	D_10__	D_11__	D_12__	D_13__	D_14__	0.737212
02b2aba67e6a22bf8368d54b3952c855	OTU_1706	D_0__Eukaryota	D_1__Archaeplastida	D_2__Chloroplastida	D_3__Charophyta	D_4__Phragmoplastophyta	D_5__Streptophyta	D_6__Embryophyta	D_7__uncultured	D_8__uncultured eukaryote	D_9__	D_10__	D_11__	D_12__	D_13__	D_14__	0.999991
dfe4d2bb45f2d8737932687c9d8e6085	OTU_1707	D_0__Eukaryota															1
f169e8c0ba78e91488d108726680f242	OTU_1708	D_0__Eukaryota	D_1__SAR	D_2__Alveolata	D_3__Dinoflagellata	D_4__Dinophyceae	D_5__Peridiniphycidae	D_6__Peridiniales	D_7__Peridinium	D_8__uncultured eukaryote	D_9__	D_10__	D_11__	D_12__	D_13__	D_14__	0.719175
65fa3cdcc2bc36abcc8b50aadd372ad0	OTU_1709	D_0__Eukaryota															1
87ce1469b391a9931510a24fa7157a51	OTU_1710	D_0__Eukaryota	D_1__SAR	D_2__Alveolata	D_3__Dinoflagellata	D_4__Dinophyceae	D_5__Gymnodiniphycidae	D_6__Gymnodinium clade									0.720244
5b27cd80cb6b8799d91ce90e9d369a41	OTU_1711	D_0__Eukaryota	D_1__SAR	D_2__Stramenopiles	D_3__Ochrophyta	D_4__Diatomea	D_5__Bacillariophytina	D_6__Bacillariophyceae									0.976268
d0e25383fa389cdf30142abb701d4d61	OTU_1712	D_0__Eukaryota	D_1__SAR	D_2__Stramenopiles	D_3__Ochrophyta	D_4__Chrysophyceae	D_5__Synurales	D_6__Mallomonas									0.970483
f3694d173edfac4e4d2f52349b91b76c	OTU_1713	D_0__Eukaryota															1
5c8ff7e27f633526d3ea5e0ceeb20e24	OTU_1714	D_0__Eukaryota															1
d01aa82cab49e3a56f0e042747044ad0	OTU_1715	D_0__Eukaryota	D_1__Haptophyta	D_2__Prymnesiophyceae	D_3__Prymnesiales	D_4__Chrysochromulina	D_5__uncultured marine picoeukaryote	D_6__	D_7__	D_8__	D_9__	D_10__	D_11__	D_12__	D_13__	D_14__	0.991029
079c174b9597dabff8e4bbf0dc29b9d9	OTU_1716	D_0__Eukaryota	D_1__SAR	D_2__Alveolata													0.813749
4b0d2f4a6e8b0a6fa9e6ae1e034c7b0a	OTU_1717	D_0__Eukaryota	D_1__SAR	D_2__Stramenopiles	D_3__Ochrophyta	D_4__Diatomea	D_5__Bacillariophytina	D_6__Bacillariophyceae									0.974097
444ab834e7001dc9d867dd00ceb862d9	OTU_1718	D_0__Eukaryota	D_1__SAR	D_2__Stramenopiles													0.991918
511d3a543d35cbd01a2655097bbe073a	OTU_1719	D_0__Eukaryota	D_1__Archaeplastida	D_2__Chloroplastida	D_3__Chlorophyta	D_4__Mamiellophyceae	D_5__Mamiellales	D_6__Ostreococcus	D_7__uncultured Chlorophyta	D_8__	D_9__	D_10__	D_11__	D_12__	D_13__	D_14__	0.999996
099766544f6816345ddb8b87386c316d	OTU_1720	D_0__Eukaryota	D_1__SAR	D_2__Stramenopiles	D_3__Labyrinthulomycetes	D_4__Thraustochytriaceae	D_5__Aplanochytrium	D_6__uncultured marine eukaryote	D_7__	D_8__	D_9__	D_10__	D_11__	D_12__	D_13__	D_14__	0.973038
438418cb909c8015df8bd5e927d955da	OTU_1721	D_0__Eukaryota	D_1__SAR	D_2__Stramenopiles	D_3__Ochrophyta	D_4__Diatomea	D_5__Bacillariophytina	D_6__Bacillariophyceae	D_7__Navicula								0.781045
e458b9d01c4eeda023008bc47e350ea5	OTU_1722	D_0__Eukaryota	D_1__SAR	D_2__Stramenopiles	D_3__Ochrophyta	D_4__Diatomea	D_5__Coscinodiscophytina	D_6__Fragilariales									0.918135
c1511b48628ac68a929a491de14783ee	OTU_1723	D_0__Eukaryota	D_1__SAR														0.731106
ae25cbecf505037db5e3edc3c6e74184	OTU_1724	D_0__Eukaryota	D_1__SAR	D_2__Stramenopiles	D_3__Ochrophyta	D_4__Diatomea	D_5__Bacillariophytina	D_6__Bacillariophyceae									0.969322
32ddae634b3d95c0ef7b28be0bb8de23	OTU_1725	D_0__Eukaryota	D_1__SAR	D_2__Stramenopiles	D_3__Ochrophyta	D_4__Diatomea	D_5__Bacillariophytina	D_6__Bacillariophyceae									0.711082
3341c58dddceec1ff52a645259e19b6d	OTU_1726	D_0__Eukaryota	D_1__SAR	D_2__Stramenopiles	D_3__MAST-8	D_4__uncultured marine eukaryote	D_5__	D_6__	D_7__	D_8__	D_9__	D_10__	D_11__	D_12__	D_13__	D_14__	0.999615
ed84df800de0db4ccce96ad264cc4219	OTU_1727	D_0__Eukaryota															1
e7fd6ea8570e93be52386fd22daf50f6	OTU_1728	D_0__Eukaryota															1
7ccb50d51a571d7ec7df847a2f842d58	OTU_1729	D_0__Eukaryota	D_1__Opisthokonta	D_2__Holozoa	D_3__Metazoa (Animalia)	D_4__Eumetazoa	D_5__Bilateria	D_6__Arthropoda	D_7__Crustacea	D_8__Maxillopoda	D_9__Copepoda	D_10__Calanoida	D_11__uncultured eukaryote	D_12__	D_13__	D_14__	0.99193
546c1faa0e26306f4a22658cd2ec5169	OTU_1730	D_0__Eukaryota	D_1__SAR	D_2__Alveolata	D_3__Ciliophora	D_4__Intramacronucleata	D_5__Spirotrichea	D_6__Oligotrichia	D_7__Strombidium								0.900502
12f85cbf92ac5cde5e08929301539a86	OTU_1731	D_0__Eukaryota	D_1__Opisthokonta	D_2__Nucletmycea	D_3__Fungi	D_4__Dikarya	D_5__Basidiomycota	D_6__Agaricomycotina	D_7__Agaricomycetes	D_8__Trechisporales	D_9__Hydnodontaceae	D_10__Trechispora	D_11__Trechispora sp. PBM418	D_12__	D_13__	D_14__	0.962793
377b4bc6dd5e67a45a01165e6740cbda	OTU_1732	D_0__Eukaryota	D_1__Opisthokonta	D_2__Holozoa	D_3__Metazoa (Animalia)	D_4__Eumetazoa	D_5__Bilateria	D_6__Nematoda	D_7__Chromadorea	D_8__Chromadorida	D_9__uncultured eukaryote	D_10__	D_11__	D_12__	D_13__	D_14__	1
9d1251efb80d44be1cd876affce0324c	OTU_1733	D_0__Eukaryota	D_1__SAR	D_2__Alveolata	D_3__Protalveolata	D_4__Syndiniales	D_5__uncultured Duboscquella	D_6__	D_7__	D_8__	D_9__	D_10__	D_11__	D_12__	D_13__	D_14__	0.982055
31b14cf3ebb137ffe33e610b510a02a8	OTU_1734	D_0__Eukaryota	D_1__SAR	D_2__Stramenopiles	D_3__Ochrophyta	D_4__Diatomea	D_5__Bacillariophytina	D_6__Bacillariophyceae									0.965048
ab92a7293f40bab62d16ecbe14fc51c1	OTU_1735	D_0__Eukaryota	D_1__Opisthokonta	D_2__Nucletmycea	D_3__Fungi	D_4__Dikarya											0.712557
d25ae85f733023f102f2781a70e50e00	OTU_1736	D_0__Eukaryota	D_1__SAR	D_2__Stramenopiles	D_3__Ochrophyta	D_4__MOCH-2	D_5__uncultured eukaryote	D_6__	D_7__	D_8__	D_9__	D_10__	D_11__	D_12__	D_13__	D_14__	1
5ea1a1cff80392e9197000aef7ccc276	OTU_1737	D_0__Eukaryota	D_1__SAR	D_2__Stramenopiles	D_3__Ochrophyta	D_4__Diatomea	D_5__Bacillariophytina	D_6__Bacillariophyceae									0.856497
93ce69f14f55e6076d9aba4585430e5c	OTU_1738	D_0__Eukaryota															1
653ac979351f7bc3cb109e3d5b0d24e9	OTU_1739	D_0__Eukaryota	D_1__Archaeplastida	D_2__Rhodophyceae	D_3__Florideophycidae	D_4__Rhodymeniophycidae											0.876933
18a629a5a0dc7f0ccc88f9da7dc26bca	OTU_1740	D_0__Eukaryota															1
c7baf68fbe90d90a296e8b0671b337a5	OTU_1741	D_0__Eukaryota															1
24f6b9ebe8ce1f4e704db482c9f2c6c9	OTU_1742	D_0__Eukaryota	D_1__SAR	D_2__Stramenopiles	D_3__MAST-3	D_4__MAST-3C	D_5__uncultured stramenopile	D_6__	D_7__	D_8__	D_9__	D_10__	D_11__	D_12__	D_13__	D_14__	0.963044
949737a08a870c9596dd3cccf214925e	OTU_1743	D_0__Eukaryota															1
0d39c51c4c6f70603cf054a9733d4d3e	OTU_1744	D_0__Eukaryota	D_1__SAR	D_2__Stramenopiles	D_3__Ochrophyta	D_4__Diatomea	D_5__Bacillariophytina	D_6__Mediophyceae	D_7__Chaetoceros	D_8__uncultured eukaryote	D_9__	D_10__	D_11__	D_12__	D_13__	D_14__	0.996079
becb41ca18ca7731ec96dbd4b0406477	OTU_1745	D_0__Eukaryota	D_1__SAR	D_2__Alveolata													0.991071
04c2222ca88aa8b37434eacec0ce08ac	OTU_1746	D_0__Eukaryota	D_1__Opisthokonta														0.921763
1155b427e6eeb10a90cf2d8a10a41052	OTU_1747	D_0__Eukaryota	D_1__Opisthokonta	D_2__Holozoa	D_3__Metazoa (Animalia)	D_4__Eumetazoa	D_5__Bilateria	D_6__Arthropoda	D_7__Crustacea	D_8__Maxillopoda	D_9__Copepoda	D_10__Harpacticoida					0.946199
53db5a8368a80646fab872191bf39d23	OTU_1748	D_0__Eukaryota	D_1__SAR	D_2__Rhizaria	D_3__Retaria	D_4__Polycystinea	D_5__Collodaria	D_6__Collozoum									0.979852
142ddfb3a10fde2b7ef293b507322132	OTU_1749	D_0__Eukaryota	D_1__SAR														0.780564
3d631419d11217488708841fc9e75881	OTU_1750	D_0__Eukaryota															1
2c68c50623c4d4163974b28283011255	OTU_1751	D_0__Eukaryota	D_1__SAR	D_2__Stramenopiles	D_3__Ochrophyta	D_4__Diatomea	D_5__Bacillariophytina	D_6__Mediophyceae	D_7__Chaetoceros	D_8__Chaetoceros sp.	D_9__	D_10__	D_11__	D_12__	D_13__	D_14__	0.908157
bf1d5366049380683590b48de74d92f8	OTU_1752	D_0__Eukaryota	D_1__SAR	D_2__Alveolata	D_3__Ciliophora	D_4__Intramacronucleata	D_5__Spirotrichea	D_6__Oligotrichia									1
7f608655ead89e1c26a0087baf1f3f3b	OTU_1753	D_0__Eukaryota															1
97591bbca00773107bf256d08bad5043	OTU_1754	D_0__Eukaryota	D_1__Excavata	D_2__Discoba	D_3__Discicristata	D_4__Euglenozoa	D_5__Diplonemea	D_6__Diplonema	D_7__Diplonema sp. ATCC 50225	D_8__	D_9__	D_10__	D_11__	D_12__	D_13__	D_14__	0.859776
eba958efd98b164d0997155eaa0d935b	OTU_1755	D_0__Eukaryota	D_1__Opisthokonta	D_2__Holozoa	D_3__Metazoa (Animalia)	D_4__Eumetazoa	D_5__Bilateria	D_6__Arthropoda	D_7__Crustacea	D_8__Maxillopoda	D_9__Copepoda	D_10__Harpacticoida					0.870395
bd8b784100244c8d4df0324ebf43deb8	OTU_1756	D_0__Eukaryota	D_1__Opisthokonta	D_2__Holozoa	D_3__Metazoa (Animalia)	D_4__Eumetazoa	D_5__Bilateria	D_6__Arthropoda	D_7__Crustacea	D_8__Maxillopoda	D_9__Copepoda	D_10__Calanoida	D_11__uncultured eukaryote	D_12__	D_13__	D_14__	0.961166
f232d57cd7b544c4d8a42daf9c890f83	OTU_1757	D_0__Eukaryota	D_1__SAR	D_2__Alveolata													0.935733
930b23a201342b90d1b0fe16333cf17a	OTU_1758	D_0__Eukaryota															1
9d9672abe5e6fa24b65799ddfa88ee39	OTU_1759	D_0__Eukaryota															1
b57df94f5faaaf5c68e72d71d6c4082b	OTU_1760	D_0__Eukaryota	D_1__SAR	D_2__Alveolata	D_3__Protalveolata	D_4__Syndiniales	D_5__Syndiniales Group I	D_6__uncultured eukaryote	D_7__	D_8__	D_9__	D_10__	D_11__	D_12__	D_13__	D_14__	0.874549
c7a3e6478ebf01fc28bf24ebfb31fe6e	OTU_1761	D_0__Eukaryota	D_1__SAR	D_2__Stramenopiles	D_3__Ochrophyta	D_4__Diatomea	D_5__Coscinodiscophytina	D_6__Fragilariales	D_7__Pseudohimantidium	D_8__Pseudohimantidium pacificum	D_9__	D_10__	D_11__	D_12__	D_13__	D_14__	0.904228
5e88fe329b19b2b6838ec535a56faf94	OTU_1762	D_0__Eukaryota	D_1__Opisthokonta	D_2__Holozoa	D_3__Metazoa (Animalia)	D_4__Eumetazoa	D_5__Bilateria	D_6__Annelida	D_7__Polychaeta	D_8__Palpata	D_9__Phyllodocida	D_10__Sphaerosyllis hirsuta	D_11__	D_12__	D_13__	D_14__	0.719741
b8c75632587c80534da3cfa29bde945f	OTU_1763	D_0__Eukaryota															1
faaf17d57fd29b818a0c3f783d6fe419	OTU_1764	D_0__Eukaryota															1
ae96fc88e3c81191eeaed974e38e0669	OTU_1765	D_0__Eukaryota	D_1__SAR														0.816358
d18020a43718923b25ae6449e5a572fd	OTU_1766	D_0__Eukaryota															1
ef5392f59ddfa5b5ecbd5309b8b40f48	OTU_1767	D_0__Eukaryota	D_1__SAR	D_2__Stramenopiles													0.973169
45892ef7c02e27f046e952cc5839faaf	OTU_1768	D_0__Eukaryota	D_1__Excavata	D_2__Discoba	D_3__Discicristata	D_4__Euglenozoa	D_5__Euglenida	D_6__Heteronematina	D_7__Petalomonas	D_8__Scytomonas saepesedens	D_9__	D_10__	D_11__	D_12__	D_13__	D_14__	0.885535
c798c70bb1772abab6249a7246e90293	OTU_1769	D_0__Eukaryota															1
a9975562183d2d979b01343e226a1c4b	OTU_1770	D_0__Eukaryota	D_1__Opisthokonta	D_2__Holozoa	D_3__Metazoa (Animalia)	D_4__Eumetazoa	D_5__Bilateria	D_6__Gastrotricha	D_7__Chaetonotida	D_8__Chaetonotus neptuni	D_9__	D_10__	D_11__	D_12__	D_13__	D_14__	0.966732
7741dcd56288151956438f43471b578a	OTU_1771	D_0__Eukaryota															1
db5ecf6df841bdb5a5f33d8f5db02cf3	OTU_1772	D_0__Eukaryota	D_1__Opisthokonta	D_2__Holozoa	D_3__Metazoa (Animalia)	D_4__Eumetazoa	D_5__Bilateria	D_6__Annelida	D_7__Polychaeta	D_8__Palpata	D_9__Phyllodocida	D_10__Haplosyllis sp. 1 MTA-2011	D_11__	D_12__	D_13__	D_14__	0.720253
6491756fe43b9d664da23ba617b0fc93	OTU_1773	D_0__Eukaryota	D_1__Opisthokonta	D_2__Holozoa	D_3__Metazoa (Animalia)	D_4__Eumetazoa	D_5__Bilateria	D_6__Xenacoelomorpha	D_7__Acoelomorpha	D_8__Acoela							0.839769
7559cf7bec5abf718bd869c432da7c5b	OTU_1774	D_0__Eukaryota															1
e9392c1e67ec55292a45c35d2c247149	OTU_1775	D_0__Eukaryota	D_1__SAR	D_2__Stramenopiles	D_3__MAST-7	D_4__uncultured eukaryote	D_5__	D_6__	D_7__	D_8__	D_9__	D_10__	D_11__	D_12__	D_13__	D_14__	0.989111
6eab5a3341678bd1241b1aa8444fed40	OTU_1776	D_0__Eukaryota	D_1__SAR	D_2__Alveolata	D_3__Protalveolata	D_4__Syndiniales											0.701009
3e46409dbaafbbf44b25fcbfaf1b75c7	OTU_1777	D_0__Eukaryota	D_1__SAR	D_2__Stramenopiles	D_3__Ochrophyta	D_4__Diatomea	D_5__Bacillariophytina										0.734862
b478523817133fde65204dd9221861ec	OTU_1778	D_0__Eukaryota															1
72f5eb79acf81621f955c6582ce2470a	OTU_1779	D_0__Eukaryota	D_1__Opisthokonta	D_2__Holozoa	D_3__Metazoa (Animalia)	D_4__Porifera	D_5__Demospongiae	D_6__Suberitida	D_7__Terpios aploos	D_8__	D_9__	D_10__	D_11__	D_12__	D_13__	D_14__	0.993588
c68ad7eca522e54c7695bcb836f0c9fd	OTU_1780	D_0__Eukaryota	D_1__SAR	D_2__Alveolata	D_3__Dinoflagellata	D_4__Dinophyceae	D_5__Gymnodiniphycidae	D_6__Katodinium	D_7__uncultured eukaryote	D_8__	D_9__	D_10__	D_11__	D_12__	D_13__	D_14__	0.99694
9d64f0bfbac5e486f32fb3d8382d1995	OTU_1781	D_0__Eukaryota	D_1__Opisthokonta	D_2__Holozoa													0.950033
00057383dd0d0c49d1a9aff9a5cd14e9	OTU_1782	D_0__Eukaryota															1
8fe27ecd0de192348a2d87d8924d17c3	OTU_1783	D_0__Eukaryota	D_1__SAR	D_2__Rhizaria	D_3__Retaria	D_4__Foraminifera	D_5__Globothalamea	D_6__Rotaliida									0.999997
b13ca862fd4ca9d9a9ea758e6178e9fa	OTU_1784	D_0__Eukaryota															1
f549d9b4cff384ec55bc009d6c0afbfa	OTU_1785	D_0__Eukaryota	D_1__Opisthokonta	D_2__Holozoa	D_3__Metazoa (Animalia)	D_4__Eumetazoa	D_5__Cnidaria	D_6__Anthozoa	D_7__Octocorallia								0.962899
e4e148926f9ecc66f578e3b16cdc327d	OTU_1786	D_0__Eukaryota															1
2fb3c0d2097aafd8c5e998c3fc4e0a5c	OTU_1787	D_0__Eukaryota	D_1__SAR	D_2__Stramenopiles	D_3__Peronosporomycetes												0.875741
9c98f354b6aeb7b0ef02da34bab03cf7	OTU_1788	D_0__Eukaryota															1
080965fc770deb2179b5f5f23555bde7	OTU_1789	D_0__Eukaryota	D_1__SAR	D_2__Alveolata													0.872831
8e1e8d2dc2383914871b99eb3625a22e	OTU_1790	D_0__Eukaryota															1
1c1bbb58c86d789d3c8b94609a78c9c9	OTU_1791	D_0__Eukaryota															1
3a65fbe48213487f57c315f4308ab956	OTU_1792	D_0__Eukaryota	D_1__SAR	D_2__Alveolata													0.980977
f61d769828beab4a68109230291dc9f9	OTU_1793	D_0__Eukaryota	D_1__Opisthokonta	D_2__Holozoa	D_3__Metazoa (Animalia)	D_4__Eumetazoa	D_5__Bilateria										0.979281
019a9d8d9d590e18af12f0e1d3556d77	OTU_1794	D_0__Eukaryota	D_1__SAR	D_2__Alveolata													0.864792
288073be407368fd46408b8cd502011c	OTU_1795	D_0__Eukaryota	D_1__Opisthokonta														0.945943
1cc0e5c3b18e6704f4e9cf1bdfca5b77	OTU_1796	D_0__Eukaryota	D_1__SAR	D_2__Stramenopiles	D_3__Ochrophyta	D_4__Diatomea	D_5__Bacillariophytina										0.826972
18aa15cb58cb0a3617c887ff3d5fb534	OTU_1797	D_0__Eukaryota	D_1__SAR	D_2__Alveolata	D_3__Protalveolata	D_4__Syndiniales	D_5__Syndiniales Group I	D_6__uncultured Duboscquella	D_7__	D_8__	D_9__	D_10__	D_11__	D_12__	D_13__	D_14__	0.75584
18be93e4ce4048dbde3186126dcfe6fe	OTU_1798	D_0__Eukaryota	D_1__SAR	D_2__Stramenopiles	D_3__Ochrophyta	D_4__Chrysophyceae	D_5__uncultured	D_6__uncultured eukaryote	D_7__	D_8__	D_9__	D_10__	D_11__	D_12__	D_13__	D_14__	0.991255
0864723017ec7dbf2598718eeedbdcbb	OTU_1799	D_0__Eukaryota															1
78e3e0a0395391e87252e1c5a25b13ca	OTU_1800	D_0__Eukaryota															1
9fd0b6c11efd91c0bf20fda47ba2af2e	OTU_1801	D_0__Eukaryota	D_1__SAR														0.70498
047c8953f333c6e2e965d412fa53e2bc	OTU_1802	D_0__Eukaryota	D_1__SAR	D_2__Alveolata													0.70625
8a124ae0567358ccee80fc87863f79d7	OTU_1803	D_0__Eukaryota															1
802bab68e872e036a72f191eedae1911	OTU_1804	D_0__Eukaryota	D_1__Opisthokonta	D_2__Holozoa	D_3__Metazoa (Animalia)	D_4__Eumetazoa	D_5__Bilateria										0.968316
10d102844a06fb6c9377fb7d9599c73f	OTU_1805	D_0__Eukaryota															1
785b640ee7fc50d1d0231e3209265f1b	OTU_1806	D_0__Eukaryota															1
160ac7b0085a25ba434015167bf0d375	OTU_1807	D_0__Eukaryota	D_1__SAR	D_2__Alveolata													0.980763
898d6f42e7430747a60dbea0ac8676db	OTU_1808	D_0__Eukaryota	D_1__Archaeplastida	D_2__Chloroplastida	D_3__Chlorophyta	D_4__Clade VII	D_5__Subclade A	D_6__uncultured Chlorophyta	D_7__	D_8__	D_9__	D_10__	D_11__	D_12__	D_13__	D_14__	0.840385
97d7930164141410e99b08975788b47e	OTU_1809	D_0__Eukaryota	D_1__Opisthokonta	D_2__Holozoa	D_3__Metazoa (Animalia)	D_4__Eumetazoa	D_5__Bilateria										0.709085
4995109007a3bd28a96d8361830fed81	OTU_1810	D_0__Eukaryota	D_1__SAR	D_2__Stramenopiles													0.893055
3c43c3aacc6fb353bab509f5c844ec40	OTU_1811	D_0__Eukaryota															1
fe2ca34584b6970e07645a6ae7c52951	OTU_1812	D_0__Eukaryota	D_1__Opisthokonta	D_2__Holozoa	D_3__Metazoa (Animalia)	D_4__Eumetazoa	D_5__Bilateria	D_6__Arthropoda	D_7__Crustacea	D_8__Maxillopoda	D_9__Copepoda						0.994873
98ed92b1b9292107bdef3e758ecdb63f	OTU_1813	D_0__Eukaryota	D_1__Opisthokonta	D_2__Holozoa	D_3__Metazoa (Animalia)	D_4__Eumetazoa	D_5__Bilateria	D_6__Arthropoda	D_7__Crustacea	D_8__Maxillopoda	D_9__Copepoda	D_10__Cyclopoida	D_11__Cyclopina gracilis	D_12__	D_13__	D_14__	0.822218
0aa4ac697b0e7c83f1f1dbfbb8c219d8	OTU_1814	D_0__Eukaryota															1
78d006c5d9f0e5649c72020fbeec0914	OTU_1815	D_0__Eukaryota															1
0a3e38fc5c6221a58761acaf387b8772	OTU_1816	D_0__Eukaryota															1
b61a7b36be9517d26828b362d8e147e1	OTU_1817	D_0__Eukaryota	D_1__SAR	D_2__Alveolata	D_3__Ciliophora	D_4__Intramacronucleata	D_5__Spirotrichea	D_6__Choreotrichia	D_7__Amphorellopsis	D_8__uncultured eukaryote	D_9__	D_10__	D_11__	D_12__	D_13__	D_14__	0.997476
04476eeaf10e479c05f88094b4a50794	OTU_1818	D_0__Eukaryota															1
1887ece80eadcbb63e55eebabb3873db	OTU_1819	D_0__Eukaryota															1
414c25e44c54d8db2f9e3d4a042fc827	OTU_1820	D_0__Eukaryota	D_1__SAR	D_2__Stramenopiles	D_3__Ochrophyta	D_4__Diatomea	D_5__Bacillariophytina	D_6__Bacillariophyceae									0.805052
72fda5ec3195063fbfdbac5468c95b96	OTU_1821	D_0__Eukaryota															1
85847a6bcdf60547452481195fd28e4a	OTU_1822	D_0__Eukaryota	D_1__Opisthokonta														0.960534
5f19a0c13e23b167c5c51df25a28ff4f	OTU_1823	D_0__Eukaryota	D_1__Opisthokonta	D_2__Holozoa	D_3__Metazoa (Animalia)	D_4__Eumetazoa	D_5__Bilateria										0.843883
1312636fc0b57898a30e90ec50f6d567	OTU_1824	D_0__Eukaryota	D_1__Haptophyta	D_2__Prymnesiophyceae													0.997769
ecc4ea76c7fd32a27bdb774becf7cfd4	OTU_1825	D_0__Eukaryota															1
292b65648e17dc4665ad0b936fb07963	OTU_1826	D_0__Eukaryota															1
4db7fae67275263bb8affd18a002d2d1	OTU_1827	D_0__Eukaryota	D_1__SAR	D_2__Stramenopiles	D_3__Ochrophyta	D_4__Phaeophyceae	D_5__Ectocarpales	D_6__uncultured eukaryote	D_7__	D_8__	D_9__	D_10__	D_11__	D_12__	D_13__	D_14__	0.875822
27995460e10bff76c46310cbcf816c77	OTU_1828	D_0__Eukaryota	D_1__SAR	D_2__Rhizaria	D_3__Retaria	D_4__Acantharia	D_5__Chaunocanthida	D_6__Amphiacon	D_7__Amphiacon denticulatus	D_8__	D_9__	D_10__	D_11__	D_12__	D_13__	D_14__	0.938546
080352daa4a154f0b23db99fed8c1802	OTU_1829	D_0__Eukaryota	D_1__SAR	D_2__Stramenopiles	D_3__MAST-3	D_4__MAST-3I	D_5__uncultured stramenopile	D_6__	D_7__	D_8__	D_9__	D_10__	D_11__	D_12__	D_13__	D_14__	0.891478
d25fe843c76f902971683e4b519b6c80	OTU_1830	D_0__Eukaryota															1
e6e4d47c5bf68e0ab2c1796c33d976ec	OTU_1831	D_0__Eukaryota	D_1__SAR	D_2__Stramenopiles	D_3__Peronosporomycetes												0.894315
327ee900a4375aadf8830c0ad8a341b6	OTU_1832	D_0__Eukaryota	D_1__SAR	D_2__Alveolata	D_3__Apicomplexa	D_4__Conoidasida	D_5__Gregarinasina	D_6__Eugregarinorida	D_7__Lankesteria								0.996825
7afb8f45e10c605c8020184efefa9b01	OTU_1833	D_0__Eukaryota															1
aeaa83906fca9924ea3ebef1ee5d2c57	OTU_1834	D_0__Eukaryota	D_1__Opisthokonta	D_2__Holozoa	D_3__Metazoa (Animalia)	D_4__Eumetazoa	D_5__Bilateria	D_6__Chordata	D_7__Tunicata	D_8__Appendicularia	D_9__Copelata	D_10__Oikopleuridae	D_11__uncultured eukaryote	D_12__	D_13__	D_14__	0.982779
6364ab57bd8eda2d0b77e1f8aaedea2d	OTU_1835	D_0__Eukaryota	D_1__Opisthokonta	D_2__Holozoa	D_3__Metazoa (Animalia)	D_4__Eumetazoa	D_5__Ctenophora	D_6__Tentaculata	D_7__Lobata	D_8__uncultured eukaryote	D_9__	D_10__	D_11__	D_12__	D_13__	D_14__	0.986299
36425db187e36d052a8a4a89f8f4ae5e	OTU_1836	D_0__Eukaryota	D_1__SAR	D_2__Stramenopiles	D_3__MAST-8												0.79683
9b94da47bc2e122ff1fad8e8cb00900c	OTU_1837	D_0__Eukaryota	D_1__SAR	D_2__Stramenopiles	D_3__Labyrinthulomycetes												0.750715
ddc4b38309e7c5bbe54f834fad1805e2	OTU_1838	D_0__Eukaryota	D_1__Opisthokonta	D_2__Holozoa	D_3__Metazoa (Animalia)	D_4__Eumetazoa	D_5__Cnidaria	D_6__Hydrozoa	D_7__Hydroidolina	D_8__Anthoathecata							0.848557
a7f81116140378f5c9f91bdc03906a55	OTU_1839	D_0__Eukaryota	D_1__Opisthokonta	D_2__Nucletmycea	D_3__Fungi	D_4__Dikarya	D_5__Basidiomycota	D_6__Pucciniomycotina	D_7__Agaricostilbomycetes	D_8__Agaricostilbales	D_9__Agaricostilbaceae	D_10__Sterigmatomyces	D_11__Sterigmatomyces halophilus	D_12__	D_13__	D_14__	0.999942
dd6b9fbcc249678118a6f84db6dc520d	OTU_1840	D_0__Eukaryota	D_1__Excavata	D_2__Discoba	D_3__Discicristata	D_4__Euglenozoa	D_5__Kinetoplastea	D_6__Metakinetoplastina	D_7__Neobodonida	D_8__Neobodo	D_9__uncultured kinetoplastid	D_10__	D_11__	D_12__	D_13__	D_14__	0.965288
a38c4aea498fa6e5386978f8987d2cf2	OTU_1841	D_0__Eukaryota															1
e9e887662c805b0b3b1296f7010fc604	OTU_1842	D_0__Eukaryota	D_1__SAR	D_2__Stramenopiles	D_3__Ochrophyta	D_4__Diatomea	D_5__Bacillariophytina										0.998086
6f52c200036bed4940637520c07b1827	OTU_1843	D_0__Eukaryota	D_1__SAR	D_2__Alveolata	D_3__Ciliophora	D_4__Intramacronucleata	D_5__Conthreep	D_6__Oligohymenophorea	D_7__Scuticociliatia	D_8__uncultured	D_9__uncultured eukaryote	D_10__	D_11__	D_12__	D_13__	D_14__	0.998176
86125b52a67bb157c36a266429744d69	OTU_1844	D_0__Eukaryota	D_1__Opisthokonta														0.744474
a53ed16046ff5eb50f05d783b14c4d8f	OTU_1845	D_0__Eukaryota	D_1__Opisthokonta	D_2__Holozoa	D_3__Metazoa (Animalia)	D_4__Eumetazoa	D_5__Bilateria	D_6__Chordata	D_7__Vertebrata	D_8__Gnathostomata	D_9__Euteleostomi	D_10__Actinopterygii	D_11__Neopterygii	D_12__Teleostei			0.939746
02d98de2e90a730671be190a846fb416	OTU_1846	D_0__Eukaryota	D_1__SAR	D_2__Alveolata	D_3__Protalveolata	D_4__Syndiniales	D_5__Syndiniales Group II	D_6__uncultured eukaryote	D_7__	D_8__	D_9__	D_10__	D_11__	D_12__	D_13__	D_14__	0.984519
c084c98a4791a3be57d8b06a3c0cb6b2	OTU_1847	D_0__Eukaryota	D_1__SAR	D_2__Alveolata													0.992886
d58c9bf64a909521f3366607007f4bf8	OTU_1848	D_0__Eukaryota	D_1__Opisthokonta	D_2__Holozoa	D_3__Metazoa (Animalia)	D_4__Eumetazoa	D_5__Bilateria	D_6__Arthropoda	D_7__Crustacea	D_8__Maxillopoda	D_9__Copepoda	D_10__Calanoida					0.999929
211bf98b854e2a4108ed192969fffd06	OTU_1849	D_0__Eukaryota	D_1__SAR	D_2__Alveolata	D_3__Protalveolata	D_4__Syndiniales											0.790808
f4171f1a8e917f50e4f830d860b07a7d	OTU_1850	D_0__Eukaryota															1
7cb69bca8705fc2aa58fd10dbe8d31fc	OTU_1851	D_0__Eukaryota															1
3f6842755c620d14883b8e916d4be9ea	OTU_1852	D_0__Eukaryota	D_1__Opisthokonta	D_2__Holozoa	D_3__Choanoflagellida	D_4__Acanthoecida	D_5__Acanthoecidae	D_6__Pleurasiga	D_7__uncultured eukaryote	D_8__	D_9__	D_10__	D_11__	D_12__	D_13__	D_14__	0.826492
a145734e16fb95481570319601c42f85	OTU_1853	D_0__Eukaryota															1
d112ee1b73964871bed3d7268356e592	OTU_1854	D_0__Eukaryota															1
75c7f691e12b177ecc88e0934e9c3d97	OTU_1855	D_0__Eukaryota	D_1__Amoebozoa	D_2__Discosea	D_3__Flabellinia	D_4__Dactylopodida	D_5__Paramoeba	D_6__Paramoeba branchiphila	D_7__	D_8__	D_9__	D_10__	D_11__	D_12__	D_13__	D_14__	1
cb1e036c7391094eca7fd3d109b3b02a	OTU_1856	D_0__Eukaryota	D_1__SAR	D_2__Stramenopiles	D_3__Ochrophyta	D_4__Diatomea	D_5__Bacillariophytina	D_6__Bacillariophyceae									0.886106
d7030acddc992dfffee46f5328c26b40	OTU_1857	D_0__Eukaryota															1
f2f2cadd95dd162852d8eb0262d319be	OTU_1858	D_0__Eukaryota															1
7c79f9206f27f397a01ec98bc71ac500	OTU_1859	D_0__Eukaryota	D_1__SAR	D_2__Alveolata	D_3__Dinoflagellata	D_4__Dinophyceae	D_5__Gymnodiniphycidae	D_6__Gymnodinium clade	D_7__Erythropsidinium	D_8__Warnowia sp. BSL-2009a	D_9__	D_10__	D_11__	D_12__	D_13__	D_14__	0.947744
e4c6715c2ecaabc054635fa9066605ad	OTU_1860	D_0__Eukaryota	D_1__SAR	D_2__Stramenopiles													0.972901
68d4d616794a0386445bbf12d45a5727	OTU_1861	D_0__Eukaryota	D_1__Opisthokonta	D_2__Holozoa	D_3__Choanoflagellida	D_4__Acanthoecida	D_5__Stephanoecidae	D_6__Bicosta	D_7__uncultured eukaryote	D_8__	D_9__	D_10__	D_11__	D_12__	D_13__	D_14__	0.995301
e49e6293c932a97a67e9b4a5a0e07715	OTU_1862	D_0__Eukaryota	D_1__Opisthokonta	D_2__Nucletmycea	D_3__Fungi												0.970975
88dc20a668cf737711135a00b72adcba	OTU_1863	D_0__Eukaryota															1
9cecc40865fe5390d1e0a2338846c521	OTU_1864	D_0__Eukaryota															1
39a50d27a52086f8459e3f1e63ce77df	OTU_1865	D_0__Eukaryota	D_1__SAR	D_2__Stramenopiles	D_3__Ochrophyta	D_4__Diatomea	D_5__Bacillariophytina	D_6__Mediophyceae	D_7__Thalassiosira	D_8__Thalassiosira mala	D_9__	D_10__	D_11__	D_12__	D_13__	D_14__	0.973697
0a385490295740aabf308909940f030f	OTU_1866	D_0__Eukaryota	D_1__SAR	D_2__Alveolata	D_3__Dinoflagellata	D_4__Dinophyceae											0.816354
804e0b118ecd0f77edf4a3a5ba5dec83	OTU_1867	D_0__Eukaryota	D_1__Opisthokonta	D_2__Holozoa	D_3__Metazoa (Animalia)	D_4__Eumetazoa	D_5__Bilateria	D_6__Annelida	D_7__Polychaeta	D_8__Scolecida	D_9__Spionida	D_10__Boccardiella ligerica	D_11__	D_12__	D_13__	D_14__	0.993125
6bb861260a673901fb6632c9d60be8f4	OTU_1868	D_0__Eukaryota															1
aa7efb844da1d9044ef5c6d9a1a0f763	OTU_1869	D_0__Eukaryota	D_1__SAR	D_2__Stramenopiles	D_3__Ochrophyta	D_4__Diatomea	D_5__Bacillariophytina										0.739369
663470cb7a3300ef04db71d019f9874c	OTU_1870	D_0__Eukaryota	D_1__SAR	D_2__Alveolata	D_3__Protalveolata	D_4__Syndiniales	D_5__Syndiniales Group I	D_6__uncultured marine eukaryote	D_7__	D_8__	D_9__	D_10__	D_11__	D_12__	D_13__	D_14__	0.702753
374931271c6ca5b55531921f8f544b21	OTU_1871	D_0__Eukaryota	D_1__SAR	D_2__Alveolata													0.999953
dac294617dfc85ef64b74dd3a32043aa	OTU_1872	D_0__Eukaryota															1
f57f49bf60a61f3430e49dc11f8bd4ab	OTU_1873	D_0__Eukaryota	D_1__Opisthokonta	D_2__Holozoa	D_3__Metazoa (Animalia)	D_4__Eumetazoa	D_5__Bilateria	D_6__Arthropoda	D_7__Hexapoda	D_8__Insecta	D_9__Pterygota	D_10__Neoptera	D_11__Diptera	D_12__Culex quinquefasciatus (southern house mosquito)	D_13__	D_14__	0.968942
870c714dcbd9304117d5d2be92540bff	OTU_1874	D_0__Eukaryota	D_1__SAR	D_2__Stramenopiles	D_3__Ochrophyta												0.744558
1312849dd387dfad50803ac22bb21254	OTU_1875	D_0__Eukaryota	D_1__SAR	D_2__Alveolata	D_3__Dinoflagellata	D_4__Dinophyceae	D_5__Gymnodiniphycidae	D_6__Suessiaceae	D_7__Symbiodinium								0.970476
6c395a58ffef4ee8a40efdc8a9e51740	OTU_1876	D_0__Eukaryota	D_1__Opisthokonta	D_2__Holozoa													0.963267
f25faef61e49d1d1f7d5937fc4fa0146	OTU_1877	D_0__Eukaryota	D_1__SAR	D_2__Stramenopiles	D_3__Labyrinthulomycetes	D_4__Thraustochytriaceae	D_5__Ulkenia										0.981402
c9a0e70572cc9537b1dd80e550f8aead	OTU_1878	D_0__Eukaryota	D_1__Opisthokonta	D_2__Holozoa	D_3__Metazoa (Animalia)	D_4__Eumetazoa	D_5__Bilateria	D_6__Chordata	D_7__Vertebrata	D_8__Gnathostomata	D_9__Euteleostomi	D_10__Actinopterygii	D_11__Neopterygii	D_12__Teleostei			0.950572
a8a09e4bd6a4d1568ea09c8271ff1060	OTU_1879	D_0__Eukaryota	D_1__SAR	D_2__Stramenopiles	D_3__Ochrophyta	D_4__Diatomea											0.994896
1c1c7c5a70fe18c7642f608572db47f8	OTU_1880	D_0__Eukaryota															1
0b4ca8807a73cb78086b7e9243ccb2f9	OTU_1881	D_0__Eukaryota	D_1__SAR	D_2__Alveolata	D_3__Apicomplexa												0.827456
eacb2242d799e20234be8b902cd84b3b	OTU_1882	D_0__Eukaryota	D_1__Opisthokonta	D_2__Holozoa	D_3__Metazoa (Animalia)	D_4__Eumetazoa	D_5__Bilateria	D_6__Gastrotricha	D_7__Macrodasyida	D_8__Mesodasys adenotubulatus	D_9__	D_10__	D_11__	D_12__	D_13__	D_14__	0.999999
fefb83ee8fa0d43fa60a7cd7de722d54	OTU_1883	D_0__Eukaryota	D_1__Opisthokonta	D_2__Holozoa	D_3__Metazoa (Animalia)	D_4__Porifera	D_5__Demospongiae	D_6__Dictyoceratida	D_7__Hippospongia communis (horse sponge)	D_8__	D_9__	D_10__	D_11__	D_12__	D_13__	D_14__	0.999966
876cd36ffd0799c2572e050060500eb1	OTU_1884	D_0__Eukaryota															1
e3e8367bae8284bf51bb720aed98deb4	OTU_1885	D_0__Eukaryota															1
8d3ba10758ee8bc4cd2516db338360a9	OTU_1886	D_0__Eukaryota	D_1__SAR	D_2__Stramenopiles	D_3__Ochrophyta	D_4__Chrysophyceae											0.998541
8f5ca9473659ae1fa5c0d15c3251bc11	OTU_1887	D_0__Eukaryota	D_1__SAR	D_2__Alveolata													0.785496
7ee72fd1e6d85db1a2f05ac455e9d0e3	OTU_1888	D_0__Eukaryota	D_1__Archaeplastida	D_2__Chloroplastida	D_3__Chlorophyta	D_4__Chlorodendrophyceae	D_5__Chlorodendrales	D_6__Tetraselmis	D_7__Tetraselmis chuii	D_8__	D_9__	D_10__	D_11__	D_12__	D_13__	D_14__	0.70454
681668e0444411c21559a6a6c26e4c6b	OTU_1889	D_0__Eukaryota	D_1__Opisthokonta	D_2__Nucletmycea	D_3__Fungi	D_4__Dikarya	D_5__Ascomycota	D_6__Pezizomycotina	D_7__Eurotiomycetes	D_8__Eurotiales	D_9__Aspergillaceae	D_10__Aspergillus					0.872805
4027aac823c60ca71da9ea7074e692a5	OTU_1890	D_0__Eukaryota	D_1__SAR	D_2__Stramenopiles	D_3__Ochrophyta	D_4__Diatomea											0.997726
fb4281b52c833d19062741dc2839ba38	OTU_1891	D_0__Eukaryota	D_1__SAR	D_2__Stramenopiles	D_3__Ochrophyta	D_4__Chrysophyceae											0.998639
ca5691b71f5616a1609d85d9aae07838	OTU_1892	D_0__Eukaryota	D_1__SAR	D_2__Stramenopiles	D_3__MAST-1	D_4__MAST-1D	D_5__uncultured stramenopile	D_6__	D_7__	D_8__	D_9__	D_10__	D_11__	D_12__	D_13__	D_14__	0.945368
f0bf04970a2b383b3bd88be6040aef75	OTU_1893	D_0__Eukaryota	D_1__SAR	D_2__Stramenopiles	D_3__Ochrophyta	D_4__Diatomea	D_5__Bacillariophytina	D_6__Bacillariophyceae									0.753401
569d864aa5b53baa5591ca5d2db3ba05	OTU_1894	D_0__Eukaryota	D_1__SAR	D_2__Alveolata	D_3__Dinoflagellata	D_4__Dinophyceae											0.863908
9fc90d1c999f3965903391f7e1aeae45	OTU_1895	D_0__Eukaryota															1
594f39c85989b59bd13ee63b7d9c8b9e	OTU_1896	D_0__Eukaryota	D_1__Opisthokonta	D_2__Holozoa	D_3__Metazoa (Animalia)	D_4__Eumetazoa	D_5__Bilateria										0.860837
2d1570eca17d56e3c8e7f0e47d899d7b	OTU_1897	D_0__Eukaryota	D_1__Opisthokonta	D_2__Holozoa	D_3__Metazoa (Animalia)	D_4__Eumetazoa	D_5__Bilateria	D_6__Xenacoelomorpha	D_7__Acoelomorpha	D_8__Acoela	D_9__Simplicomorpha gigantorhabditis	D_10__	D_11__	D_12__	D_13__	D_14__	0.999999
35dec9bb2f4047d3771aa49027c5ecd0	OTU_1898	D_0__Eukaryota															1
5f1f47dc4ae8a854f44a331ab0840dea	OTU_1899	D_0__Eukaryota	D_1__SAR	D_2__Stramenopiles	D_3__Ochrophyta	D_4__Chrysophyceae											0.788369
79567eea6d39da5f9a196ff461f90bea	OTU_1900	D_0__Eukaryota															1
e0aeaa822d7cb887913489869cece352	OTU_1901	D_0__Eukaryota	D_1__SAR	D_2__Stramenopiles	D_3__Ochrophyta	D_4__Diatomea	D_5__Bacillariophytina	D_6__Bacillariophyceae									0.857337
43a8c5dc06b7efe8271f20bd2accfec5	OTU_1902	D_0__Eukaryota	D_1__SAR	D_2__Stramenopiles													0.998215
a43a91a01098650bcb1bb380be21eed7	OTU_1903	D_0__Eukaryota	D_1__SAR	D_2__Alveolata	D_3__Protalveolata	D_4__Syndiniales	D_5__Syndiniales Group I	D_6__uncultured alveolate	D_7__	D_8__	D_9__	D_10__	D_11__	D_12__	D_13__	D_14__	0.989879
bc465dee8f7dfe884f32d32ff9c7f0ca	OTU_1904	D_0__Eukaryota															1
db5e357a7b56cfa4cd65109f7cd45550	OTU_1905	D_0__Eukaryota	D_1__Archaeplastida	D_2__Chloroplastida													0.760596
101ab2a674ca7b724bf438dfa747fb48	OTU_1906	D_0__Eukaryota	D_1__SAR	D_2__Alveolata	D_3__Dinoflagellata	D_4__Dinophyceae	D_5__Peridiniphycidae	D_6__Gonyaulacales	D_7__Neoceratium	D_8__uncultured eukaryote	D_9__	D_10__	D_11__	D_12__	D_13__	D_14__	0.986653
73c835ec917aab41a62eb338afd38b8c	OTU_1907	D_0__Eukaryota	D_1__SAR	D_2__Stramenopiles													0.996716
80f49b07aedd7706ab78719969f57429	OTU_1908	D_0__Eukaryota															1
b8aae7a106832bb211c554098a90ad86	OTU_1909	D_0__Eukaryota	D_1__SAR	D_2__Stramenopiles													0.977583
06555932c1127a9bffee8c48d89123a3	OTU_1910	D_0__Eukaryota	D_1__Opisthokonta	D_2__Holozoa	D_3__Metazoa (Animalia)	D_4__Eumetazoa	D_5__Bilateria	D_6__Chordata	D_7__Tunicata	D_8__Appendicularia	D_9__Copelata	D_10__Oikopleuridae	D_11__uncultured eukaryote	D_12__	D_13__	D_14__	0.985981
c354de9b0bae20f4939fa5d7975e36ea	OTU_1911	D_0__Eukaryota	D_1__Opisthokonta	D_2__Holozoa	D_3__Metazoa (Animalia)	D_4__Eumetazoa	D_5__Bilateria	D_6__Annelida	D_7__Polychaeta								0.747434
6619367355004415649f6bb347f9adff	OTU_1912	D_0__Eukaryota	D_1__SAR	D_2__Alveolata	D_3__Ciliophora	D_4__Intramacronucleata	D_5__Spirotrichea	D_6__Choreotrichia									0.999971
1c591cd502c29a295b305eb82374e013	OTU_1913	D_0__Eukaryota	D_1__SAR	D_2__Alveolata	D_3__Dinoflagellata	D_4__Dinophyceae											0.865723
c97fcaf411812dc7f6cc87a16447e85a	OTU_1914	D_0__Eukaryota	D_1__SAR	D_2__Alveolata	D_3__Protalveolata	D_4__Syndiniales	D_5__Syndiniales Group I										0.703992
1e4f53ea46d0f73e7058b98bc31ad78b	OTU_1915	D_0__Eukaryota															1
7752d52c3bff07d74d352447a1e90404	OTU_1916	D_0__Eukaryota	D_1__SAR	D_2__Alveolata	D_3__Apicomplexa	D_4__Conoidasida	D_5__Gregarinasina	D_6__Eugregarinorida	D_7__Apicomplexa sp. 1 KCW-2013	D_8__	D_9__	D_10__	D_11__	D_12__	D_13__	D_14__	0.854945
a892ba9b80067a070541014b2dd55dab	OTU_1917	D_0__Eukaryota	D_1__Opisthokonta	D_2__Holozoa	D_3__Metazoa (Animalia)	D_4__Eumetazoa	D_5__Bilateria										0.998515
1de8aa7fc0ff71c32a6aa9ee345ac2a7	OTU_1918	D_0__Eukaryota	D_1__Archaeplastida	D_2__Rhodophyceae	D_3__Florideophycidae	D_4__Rhodymeniophycidae	D_5__Wrangelia sp. DW	D_6__	D_7__	D_8__	D_9__	D_10__	D_11__	D_12__	D_13__	D_14__	0.999791
86307687d4ad3c35f7c08e43c2fea30c	OTU_1919	D_0__Eukaryota															1
32e02084ae47a10f0f0d3dd91c62a240	OTU_1920	D_0__Eukaryota	D_1__SAR	D_2__Stramenopiles	D_3__Ochrophyta	D_4__Diatomea	D_5__Bacillariophytina	D_6__Bacillariophyceae									0.951957
076f1b104fba1cf1e4acc58050529593	OTU_1921	D_0__Eukaryota	D_1__SAR	D_2__Alveolata	D_3__Dinoflagellata	D_4__Dinophyceae	D_5__Peridiniphycidae	D_6__Gonyaulacales	D_7__Coolia	D_8__Coolia canariensis	D_9__	D_10__	D_11__	D_12__	D_13__	D_14__	0.994538
e18131db2f2e61b7f70432281585e472	OTU_1922	D_0__Eukaryota	D_1__SAR	D_2__Stramenopiles	D_3__Ochrophyta	D_4__Chrysophyceae											0.906471
32e2026f2423c96764835bb38f390b10	OTU_1923	D_0__Eukaryota	D_1__SAR	D_2__Rhizaria	D_3__Retaria	D_4__RAD B	D_5__uncultured marine Polycystinea	D_6__	D_7__	D_8__	D_9__	D_10__	D_11__	D_12__	D_13__	D_14__	1
87689fc67fb4079e8e67d673f2103b8e	OTU_1924	D_0__Eukaryota	D_1__Opisthokonta	D_2__Holozoa	D_3__Metazoa (Animalia)	D_4__Eumetazoa	D_5__Bilateria	D_6__uncultured	D_7__uncultured eukaryote	D_8__	D_9__	D_10__	D_11__	D_12__	D_13__	D_14__	0.86428
d32b14f6a5d56a7bcd23ef6fee508667	OTU_1925	D_0__Eukaryota	D_1__SAR	D_2__Rhizaria	D_3__Retaria	D_4__uncultured	D_5__uncultured marine eukaryote	D_6__	D_7__	D_8__	D_9__	D_10__	D_11__	D_12__	D_13__	D_14__	0.799035
b5cde81eb99f4a7c5d46f6e3ec8070f7	OTU_1926	D_0__Eukaryota	D_1__SAR	D_2__Alveolata	D_3__Protalveolata	D_4__Syndiniales	D_5__Syndiniales Group I	D_6__Karlodinium veneficum	D_7__	D_8__	D_9__	D_10__	D_11__	D_12__	D_13__	D_14__	0.703269
ef0518032bf3fde739f21af6a1fdeab9	OTU_1927	D_0__Eukaryota	D_1__SAR	D_2__Alveolata													0.994642
95ca549229ae262f5f5f629007caed18	OTU_1928	D_0__Eukaryota	D_1__Opisthokonta	D_2__Holozoa	D_3__Metazoa (Animalia)	D_4__Porifera	D_5__Calcarea	D_6__Calcinea	D_7__Clathrinida	D_8__Leucetta sp. Manuel H2	D_9__	D_10__	D_11__	D_12__	D_13__	D_14__	0.995917
433504e2dfa09a856f2cd3c01022f014	OTU_1929	D_0__Eukaryota	D_1__SAR	D_2__Stramenopiles	D_3__MAST-6	D_4__eukaryote marine clone ME1-24	D_5__	D_6__	D_7__	D_8__	D_9__	D_10__	D_11__	D_12__	D_13__	D_14__	0.762956
20491ffb0fee2c704ec0cb62aea393af	OTU_1930	D_0__Eukaryota															1
3654ad47ca4cf9d26bbd1cfc26650c48	OTU_1931	D_0__Eukaryota	D_1__SAR	D_2__Alveolata	D_3__Ciliophora	D_4__Intramacronucleata	D_5__Conthreep	D_6__Nassophorea	D_7__uncultured	D_8__uncultured eukaryote	D_9__	D_10__	D_11__	D_12__	D_13__	D_14__	0.999991
43eb0408a240b0806a9ea1b28028f39f	OTU_1932	D_0__Eukaryota	D_1__SAR	D_2__Stramenopiles	D_3__MAST-3												0.999849
89e3f3cfa23e4b7304d198c907fb2d05	OTU_1933	D_0__Eukaryota	D_1__SAR	D_2__Alveolata	D_3__Dinoflagellata												0.842585
c9caa518640e2099d67e5d464265b36a	OTU_1934	D_0__Eukaryota	D_1__SAR	D_2__Alveolata													0.91092
519987126f6c8c67d01f3e0de94ee32b	OTU_1935	D_0__Eukaryota	D_1__SAR	D_2__Stramenopiles	D_3__Ochrophyta	D_4__Pelagophyceae	D_5__Pelagomonadales	D_6__Pelagomonas	D_7__Pelagomonas calceolata	D_8__	D_9__	D_10__	D_11__	D_12__	D_13__	D_14__	0.999518
de8a1d585d9c1406fb6e94c7ed294340	OTU_1936	D_0__Eukaryota	D_1__SAR	D_2__Alveolata	D_3__Dinoflagellata	D_4__Dinophyceae	D_5__Peridiniphycidae	D_6__Peridiniales	D_7__Protoperidinium	D_8__uncultured marine eukaryote	D_9__	D_10__	D_11__	D_12__	D_13__	D_14__	0.908593
a88222d267bc72bfce4f509834b114a8	OTU_1937	D_0__Eukaryota	D_1__Excavata	D_2__Discoba	D_3__Discicristata	D_4__Euglenozoa	D_5__Euglenida	D_6__Heteronematina	D_7__Petalomonas	D_8__uncultured eukaryote	D_9__	D_10__	D_11__	D_12__	D_13__	D_14__	0.999993
f04150474cfad13ce822523b2b1ec513	OTU_1938	D_0__Eukaryota															1
6e32f00e98637ef080a159fe4c63d8dd	OTU_1939	D_0__Eukaryota	D_1__SAR	D_2__Stramenopiles	D_3__Ochrophyta	D_4__Diatomea	D_5__Bacillariophytina	D_6__Bacillariophyceae									0.957795
d96bd94548dc114260bf0e6d6c80800d	OTU_1940	D_0__Eukaryota	D_1__Archaeplastida	D_2__Rhodophyceae	D_3__Florideophycidae	D_4__Corallinophycidae	D_5__Hydrolithon										0.825902
5b4e85b1791ca31e3755f99ef1ee8e9a	OTU_1941	D_0__Eukaryota															1
3d5802cf0cd9908fe69b33b064208547	OTU_1942	D_0__Eukaryota	D_1__Opisthokonta	D_2__Holozoa													0.705332
cadca595c7be358aca5c7e929e980d3c	OTU_1943	D_0__Eukaryota	D_1__SAR	D_2__Stramenopiles	D_3__Ochrophyta	D_4__Eustigmatophyceae	D_5__Eustigmatales										0.72297
eec38609da340c12e68b5f57b29bd5cb	OTU_1944	D_0__Eukaryota	D_1__SAR	D_2__Alveolata	D_3__Ciliophora	D_4__Intramacronucleata	D_5__Spirotrichea	D_6__Oligotrichia	D_7__Strombidium	D_8__Strombidium sp. JG-2011a	D_9__	D_10__	D_11__	D_12__	D_13__	D_14__	0.984533
2301e914ecdc46c6502b015cfbdeebe8	OTU_1945	D_0__Eukaryota	D_1__Excavata	D_2__Discoba	D_3__Discicristata	D_4__Euglenozoa	D_5__Euglenida	D_6__Heteronematina	D_7__Petalomonas	D_8__uncultured eukaryote	D_9__	D_10__	D_11__	D_12__	D_13__	D_14__	0.999491
410dd6a722d2c978c183466722a52a8e	OTU_1946	D_0__Eukaryota															1
53e3774df92349cebe1ce82541fca74e	OTU_1947	D_0__Eukaryota	D_1__SAR	D_2__Stramenopiles	D_3__Ochrophyta	D_4__Diatomea											0.993578
e6f5e4388048b8a2394b3ada4186ad7a	OTU_1948	D_0__Eukaryota															1
89e2114f37145dc4731b2a8bbc70a610	OTU_1949	D_0__Eukaryota	D_1__Opisthokonta														0.73199
d0c1566520c03edb51b2e997da7a024d	OTU_1950	D_0__Eukaryota															1
c9d94cf69f28336920dda54b2a5240ee	OTU_1951	D_0__Eukaryota	D_1__SAR	D_2__Alveolata	D_3__Ciliophora	D_4__Intramacronucleata	D_5__Conthreep	D_6__Oligohymenophorea	D_7__Apostomatia								0.999618
0a9da8ece94a9ae4ef8cbea1806e3595	OTU_1952	D_0__Eukaryota	D_1__SAR	D_2__Alveolata	D_3__Dinoflagellata	D_4__Dinophyceae											0.817726
e874f30ff10128da8db2a4ae2d23ab4b	OTU_1953	D_0__Eukaryota	D_1__Opisthokonta	D_2__Holozoa	D_3__Metazoa (Animalia)	D_4__Porifera	D_5__Demospongiae	D_6__Clionaida	D_7__Spirastrella sp. SPS.1	D_8__	D_9__	D_10__	D_11__	D_12__	D_13__	D_14__	0.999458
515537ea5eade6d2b33117741f029b7f	OTU_1954	D_0__Eukaryota															1
49e1fe57bd301a03d5cb497f093e0a66	OTU_1955	D_0__Eukaryota															1
26ebe53f391c29b881d2baee4389c6e8	OTU_1956	D_0__Eukaryota	D_1__Opisthokonta	D_2__Holozoa	D_3__Metazoa (Animalia)	D_4__Eumetazoa	D_5__Cnidaria	D_6__Hydrozoa	D_7__Trachylinae	D_8__Trachymedusae	D_9__uncultured metazoan	D_10__	D_11__	D_12__	D_13__	D_14__	0.992146
36594c501b819d0d8e5cafcdfd519b5f	OTU_1957	D_0__Eukaryota	D_1__SAR	D_2__Stramenopiles	D_3__Ochrophyta	D_4__Diatomea	D_5__Bacillariophytina	D_6__Bacillariophyceae	D_7__Amphora								0.78019
40c4d86e46594d1ce12bf132de39e180	OTU_1958	D_0__Eukaryota	D_1__Opisthokonta	D_2__Holozoa	D_3__Metazoa (Animalia)	D_4__Eumetazoa	D_5__Bilateria	D_6__Arthropoda	D_7__Crustacea	D_8__Maxillopoda	D_9__Copepoda	D_10__Cyclopoida	D_11__Xarifia sp. New Caledonia-RJH-2004	D_12__	D_13__	D_14__	0.997893
6672357769a00e1f086265d80c7202ac	OTU_1959	D_0__Eukaryota															1
a1461918d6af066b70e4a7f62e1ae7c3	OTU_1960	D_0__Eukaryota	D_1__Opisthokonta	D_2__Holozoa	D_3__Metazoa (Animalia)	D_4__Eumetazoa	D_5__Bilateria										0.939665
4ff9258f4079d0beaa4f51cd917eaa5c	OTU_1961	D_0__Eukaryota															1
196fdb2e6acb531e825afb33edc436ec	OTU_1962	D_0__Eukaryota	D_1__SAR	D_2__Alveolata	D_3__Ciliophora	D_4__Intramacronucleata	D_5__Spirotrichea										0.758062
392f9bea3b4d74713fabdaed6401c761	OTU_1963	D_0__Eukaryota	D_1__SAR														0.98366
95e4f57e2aae30a997be3e5894ebbe90	OTU_1964	D_0__Eukaryota	D_1__SAR	D_2__Stramenopiles	D_3__Ochrophyta	D_4__Diatomea	D_5__Bacillariophytina	D_6__Bacillariophyceae	D_7__Navicula								0.701419
21e8ba13410dd6092fa6bc292831cfe1	OTU_1965	D_0__Eukaryota	D_1__Opisthokonta	D_2__Holozoa													0.708482
db7b6f5e67ec91600ef4d5798ef2e37d	OTU_1966	D_0__Eukaryota															1
6bb3f36a39b8b4c492a89b8508efe958	OTU_1967	D_0__Eukaryota															1
363397c5ce17598c21d3cef84113640e	OTU_1968	D_0__Eukaryota															1
1ab57ef0e5522e56d1ba6fe70ef81243	OTU_1969	D_0__Eukaryota	D_1__SAR	D_2__Alveolata	D_3__Protalveolata	D_4__Syndiniales	D_5__Syndiniales Group I	D_6__Takayama cf. pulchellum	D_7__	D_8__	D_9__	D_10__	D_11__	D_12__	D_13__	D_14__	0.764102
1933e341d6094bd46966cd96502bb0dc	OTU_1970	D_0__Eukaryota															1
d075b1b1e9247fc0fc312659b1e514e8	OTU_1971	D_0__Eukaryota	D_1__Opisthokonta	D_2__Holozoa	D_3__Metazoa (Animalia)	D_4__Eumetazoa	D_5__Bilateria										0.944881
ba985b615cca7daeaa0bcea395cea9cf	OTU_1972	D_0__Eukaryota															1
c8e48fffea2d06786cfdfb7fdd209ea4	OTU_1973	D_0__Eukaryota															1
134425ce7ae3cba5eec353cc25fda6de	OTU_1974	D_0__Eukaryota	D_1__SAR	D_2__Stramenopiles													0.99086
77b3c24b5610c61298a178da4e4b12f5	OTU_1975	D_0__Eukaryota	D_1__SAR	D_2__Stramenopiles	D_3__Ochrophyta	D_4__Diatomea	D_5__Bacillariophytina	D_6__Bacillariophyceae	D_7__Pleurosigma	D_8__uncultured marine eukaryote	D_9__	D_10__	D_11__	D_12__	D_13__	D_14__	0.827874
462e7847d5e117bb77af56fdb017dc78	OTU_1976	D_0__Eukaryota	D_1__Opisthokonta	D_2__Holozoa	D_3__Metazoa (Animalia)	D_4__Eumetazoa	D_5__Bilateria	D_6__Gastrotricha	D_7__Chaetonotida								0.996075
fb993074a505f9f7664bcb5b053c3c45	OTU_1977	D_0__Eukaryota															1
73a546541a18bb4ebaef07cd75227cdb	OTU_1978	D_0__Eukaryota															1
c52160f3258aa1b8d5503526fc312742	OTU_1979	D_0__Eukaryota															1
51ffdb8f1dcee1e15856ae3dc87a5514	OTU_1980	D_0__Eukaryota	D_1__Opisthokonta	D_2__Holozoa	D_3__Metazoa (Animalia)	D_4__Eumetazoa	D_5__Bilateria	D_6__Xenacoelomorpha	D_7__Acoelomorpha	D_8__Acoela	D_9__Atriofronta polyvacuola	D_10__	D_11__	D_12__	D_13__	D_14__	1
7e975648de2885f353c21eadcfebce0a	OTU_1981	D_0__Eukaryota	D_1__SAR	D_2__Stramenopiles													0.90915
0bb02592db17f8ff804559c7f3477ca6	OTU_1982	D_0__Eukaryota	D_1__Opisthokonta	D_2__Holozoa	D_3__Metazoa (Animalia)	D_4__Eumetazoa	D_5__Cnidaria	D_6__Hydrozoa	D_7__Hydroidolina	D_8__Leptothecata	D_9__Melicertissa sp. AGC-2001	D_10__	D_11__	D_12__	D_13__	D_14__	0.999997
392b02911de2602c3c7e48b1bd1c0212	OTU_1983	D_0__Eukaryota	D_1__Opisthokonta	D_2__Holozoa	D_3__Metazoa (Animalia)	D_4__Eumetazoa	D_5__Bilateria	D_6__Gastrotricha	D_7__Chaetonotida	D_8__uncultured eukaryote	D_9__	D_10__	D_11__	D_12__	D_13__	D_14__	0.916231
1a85d14d85d32099944af65d032f2c26	OTU_1984	D_0__Eukaryota	D_1__Opisthokonta	D_2__Holozoa	D_3__Metazoa (Animalia)	D_4__Eumetazoa	D_5__Cnidaria	D_6__Anthozoa	D_7__Octocorallia								0.999376
9785c19760e4d6c66f11e16e52783eaf	OTU_1985	D_0__Eukaryota	D_1__SAR	D_2__Stramenopiles	D_3__Ochrophyta	D_4__Diatomea	D_5__Bacillariophytina	D_6__Bacillariophyceae									0.908442
7a5c4155ba1d4c1d73cab633e6c3ef83	OTU_1986	D_0__Eukaryota	D_1__SAR	D_2__Stramenopiles	D_3__Ochrophyta	D_4__Diatomea	D_5__Bacillariophytina	D_6__Bacillariophyceae									0.882851
7a7b1de1acb62e9ed2c27e9e4def7290	OTU_1987	D_0__Eukaryota	D_1__Opisthokonta	D_2__Holozoa	D_3__Metazoa (Animalia)	D_4__Eumetazoa	D_5__Bilateria	D_6__Arthropoda	D_7__Crustacea	D_8__Maxillopoda	D_9__Copepoda	D_10__uncultured eukaryote	D_11__	D_12__	D_13__	D_14__	0.997126
9ccba60a12df2c428eccc6ec2b690164	OTU_1988	D_0__Eukaryota															1
5dcb63fc1d1467c115d44b0f5f3d869a	OTU_1989	D_0__Eukaryota															1
61c9a347dfb16b1839d47689c2b2e148	OTU_1990	D_0__Eukaryota	D_1__Haptophyta	D_2__Prymnesiophyceae	D_3__Prymnesiales	D_4__Chrysochromulina	D_5__uncultured eukaryote	D_6__	D_7__	D_8__	D_9__	D_10__	D_11__	D_12__	D_13__	D_14__	0.936316
5f3daaf33809a4dc86d90569cb500a5e	OTU_1991	D_0__Eukaryota															1
ea87251b339ffc6a5712336309d6ed18	OTU_1992	D_0__Eukaryota	D_1__SAR	D_2__Stramenopiles	D_3__Ochrophyta	D_4__Diatomea	D_5__Bacillariophytina	D_6__Bacillariophyceae									0.905388
f763244f6372047041b7199cd743fb45	OTU_1993	D_0__Eukaryota															1
d3823eed02c81e4a8a8e6745f7db3d0f	OTU_1994	D_0__Eukaryota	D_1__Opisthokonta	D_2__Holozoa	D_3__Metazoa (Animalia)	D_4__Eumetazoa	D_5__Cnidaria	D_6__Anthozoa	D_7__Octocorallia	D_8__Alcyonacea							0.79837
ead341868c68770cf680b2e7e57bc2f7	OTU_1995	D_0__Eukaryota	D_1__SAR	D_2__Stramenopiles	D_3__Peronosporomycetes	D_4__uncultured	D_5__uncultured stramenopile	D_6__	D_7__	D_8__	D_9__	D_10__	D_11__	D_12__	D_13__	D_14__	0.807257
dea08000adfda7df4ffe88024e5e4498	OTU_1996	D_0__Eukaryota	D_1__SAR	D_2__Stramenopiles	D_3__Ochrophyta												0.967814
3835bfbb6a9b2b609824b8d7c4cbca76	OTU_1997	D_0__Eukaryota	D_1__SAR	D_2__Stramenopiles	D_3__MAST-1	D_4__MAST-1D	D_5__uncultured stramenopile	D_6__	D_7__	D_8__	D_9__	D_10__	D_11__	D_12__	D_13__	D_14__	0.943771
84c8c8e2ffa86a1c638488231ac2ceec	OTU_1998	D_0__Eukaryota	D_1__SAR	D_2__Alveolata	D_3__Protalveolata	D_4__Syndiniales	D_5__Syndiniales Group II	D_6__uncultured eukaryote	D_7__	D_8__	D_9__	D_10__	D_11__	D_12__	D_13__	D_14__	0.895602
4f8e39d1cd5e8756dd9716233c31291c	OTU_1999	D_0__Eukaryota	D_1__SAR	D_2__Alveolata	D_3__Protalveolata	D_4__Syndiniales	D_5__uncultured	D_6__uncultured eukaryote	D_7__	D_8__	D_9__	D_10__	D_11__	D_12__	D_13__	D_14__	0.915062
[truncated: 18,487 more rows]

## Sheet: Eukaryote taxon 99%
Feature_id	OTU_id	Taxon_L_1	Taxon_L_2	Taxon_L_3	Taxon_L_4	Taxon_L_5	Taxon_L_6	Taxon_L_7	Taxon_L_8	Taxon_L_9	Taxon_L_10	Taxon_L_11	Taxon_L_12	Taxon_L_13	Taxon_L_14	Taxon_L_15	Confidence
c3ee8526de03da01ad3d737711cd9f56	OTU_1	D_0__Eukaryota	D1_Unindentified_Eukaryota														1
b991eb96bb7b322b992e1ce0910107f9	OTU_2	D_0__Eukaryota	D_1__Opisthokonta	D_2__Holozoa	D_3__Metazoa (Animalia)	D_4__Eumetazoa	D_5__Bilateria	D_6__Arthropoda	D_7__Crustacea	D_8__Maxillopoda	D_9__Copepoda	D_10__Cyclopoida	D_11__uncultured eukaryote	D_12__	D_13__	D_14__	0.957379
89cb70361e0b2c5493eac0a716288636	OTU_3	D_0__Eukaryota	D_1__Opisthokonta	D_2__Holozoa	D_3__Metazoa (Animalia)	D_4__Eumetazoa	D_5__Bilateria	D_6__Chordata	D_7__Vertebrata	D_8__Gnathostomata	D_9__Euteleostomi	D_10__Actinopterygii	D_11__Neopterygii	D_12__Teleostei			0.989869
e02863b01de58e6339992ffb0dfaad61	OTU_4	D_0__Eukaryota	D_1__Opisthokonta	D_2__Holozoa	D_3__Metazoa (Animalia)	D_4__Eumetazoa	D_5__Cnidaria	D_6__Hydrozoa	D_7__Hydroidolina	D_8__Siphonophorae	D_9__uncultured eukaryote	D_10__	D_11__	D_12__	D_13__	D_14__	0.967649
37983599da34156f5fd64e2c604a268d	OTU_5	D_0__Eukaryota	D_1__Opisthokonta	D_2__Holozoa	D_3__Metazoa (Animalia)	D_4__Eumetazoa	D_5__Bilateria	D_6__Arthropoda	D_7__Crustacea	D_8__Maxillopoda	D_9__Copepoda	D_10__Calanoida	D_11__uncultured eukaryote	D_12__	D_13__	D_14__	0.998677
590f64a44facc52cd027c3f6c1ef9af9	OTU_6	D_0__Eukaryota	D1_Unindentified_Eukaryota														1
6d4981b585ad288f43358bf76b4d5dcf	OTU_7	D_0__Eukaryota	D_1__Opisthokonta	D_2__Holozoa	D_3__Metazoa (Animalia)	D_4__Eumetazoa	D_5__Cnidaria	D_6__Hydrozoa	D_7__Trachylinae	D_8__Trachymedusae	D_9__uncultured metazoan	D_10__	D_11__	D_12__	D_13__	D_14__	0.827655
6bb6d5805cf87f433356a873aab61fb4	OTU_8	D_0__Eukaryota	D1_Unindentified_Eukaryota														1
1da16759bbe92942257345d8104fd234	OTU_9	D_0__Eukaryota	D_1__Opisthokonta	D_2__Holozoa	D_3__Metazoa (Animalia)	D_4__Eumetazoa	D_5__Bilateria	D_6__Annelida	D_7__Polychaeta	D_8__Palpata	D_9__Phyllodocida	D_10__Typosyllis cf. lutea MTA-2011	D_11__	D_12__	D_13__	D_14__	0.999994
178ed3007e4de9db92330fde5facf76a	OTU_10	D_0__Eukaryota	D_1__SAR	D_2__Stramenopiles	D_3__Ochrophyta	D_4__Diatomea	D_5__Bacillariophytina	D_6__Mediophyceae	D_7__Chaetoceros	D_8__Chaetoceros sp.	D_9__	D_10__	D_11__	D_12__	D_13__	D_14__	0.938712
6d6628fa112c7c53d1438e00d56fdcef	OTU_11	D_0__Eukaryota	D_1__Opisthokonta	D_2__Nucletmycea	D_3__Fungi	D_4__Dikarya	D_5__Basidiomycota	D_6__Agaricomycotina	D_7__Agaricomycetes	D_8__Agaricales	D_9__Schizophyllaceae	D_10__Schizophyllum	D_11__Schizophyllum commune	D_12__	D_13__	D_14__	0.944406
4dcf8aab2b1c0393b34c6aa6a1a1d00b	OTU_12	D_0__Eukaryota	D_1__Opisthokonta	D_2__Holozoa	D_3__Metazoa (Animalia)	D_4__Eumetazoa	D_5__Bilateria	D_6__Arthropoda	D_7__Crustacea	D_8__Maxillopoda	D_9__Copepoda	D_10__Cyclopoida	D_11__Oithona sp. 2 New Caledonia-RJH-2004	D_12__	D_13__	D_14__	0.989902
1b6f334a42ac152be697497779d06361	OTU_13	D_0__Eukaryota	D_1__SAR	D_2__Alveolata	D_3__Dinoflagellata	D_4__Dinophyceae	D_5__Gymnodiniphycidae	D_6__Gymnodinium clade	D_7__Erythropsidinium	D_8__Warnowia sp. BSL-2009a	D_9__	D_10__	D_11__	D_12__	D_13__	D_14__	0.904042
f0be5531624c827e14746ca2f610f7ba	OTU_14	D_0__Eukaryota	D_1__SAR	D_2__Alveolata	D_3__Protalveolata	D_4__Syndiniales	D_5__Syndiniales Group I	D_6__uncultured eukaryote	D_7__	D_8__	D_9__	D_10__	D_11__	D_12__	D_13__	D_14__	0.829453
da6b3cc72a29241d16fdcf32e96cc16f	OTU_15	D_0__Eukaryota	D_1__SAR	D_2__Stramenopiles	D_3__Ochrophyta	D_4__Diatomea	D_5__Bacillariophytina	D_6__Bacillariophyceae									0.999799
fd7043e394422ff07bfa836285c67214	OTU_16	D_0__Eukaryota	D_1__SAR	D_2__Alveolata	D_3__Dinoflagellata	D_4__Dinophyceae	D_5__Gymnodiniphycidae	D_6__Gymnodinium clade									0.862365
a8ec7b66a794239027e3d955cdfec2e6	OTU_17	D_0__Eukaryota	D_1__SAR	D_2__Stramenopiles	D_3__Ochrophyta	D_4__Diatomea	D_5__Bacillariophytina	D_6__Mediophyceae	D_7__Skeletonema	D_8__uncultured marine eukaryote	D_9__	D_10__	D_11__	D_12__	D_13__	D_14__	0.898914
41f13b64037fb4bb8948926434896022	OTU_18	D_0__Eukaryota	D1_Unindentified_Eukaryota														1
e886e8ce4c5a0232dd489a73db52102e	OTU_19	D_0__Eukaryota	D_1__SAR	D_2__Alveolata	D_3__Dinoflagellata	D_4__Dinophyceae											0.852541
e265c9b4be9a96618f4496ce4a44adbe	OTU_20	D_0__Eukaryota	D_1__Opisthokonta	D_2__Holozoa	D_3__Metazoa (Animalia)	D_4__Eumetazoa	D_5__Bilateria	D_6__Arthropoda	D_7__Crustacea	D_8__Maxillopoda	D_9__Copepoda	D_10__Cyclopoida	D_11__uncultured eukaryote	D_12__	D_13__	D_14__	0.999887
effde0d180994ef85936f3af4b1ae8eb	OTU_21	D_0__Eukaryota	D_1__Opisthokonta	D_2__Holozoa	D_3__Metazoa (Animalia)	D_4__Eumetazoa	D_5__Bilateria	D_6__Arthropoda	D_7__Crustacea	D_8__Maxillopoda	D_9__Copepoda	D_10__Cyclopoida					0.999243
3bd0fe508639bcbab507dc9a0a0d8e83	OTU_22	D_0__Eukaryota	D_1__SAR	D_2__Alveolata	D_3__Dinoflagellata	D_4__Dinophyceae											0.916809
631e1d8e37d60275478192c6de71c752	OTU_23	D_0__Eukaryota	D_1__SAR	D_2__Stramenopiles	D_3__Ochrophyta	D_4__Pelagophyceae	D_5__Pelagomonadales	D_6__Pelagomonas	D_7__Pelagomonas calceolata	D_8__	D_9__	D_10__	D_11__	D_12__	D_13__	D_14__	0.999851
db7b95761f05f0fc74d112944af253af	OTU_24	D_0__Eukaryota	D_1__Opisthokonta	D_2__Holozoa	D_3__Metazoa (Animalia)	D_4__Eumetazoa	D_5__Bilateria										0.903463
fbf44a9dfc990fce8011d4be5fca0c9e	OTU_25	D_0__Eukaryota	D1_Unindentified_Eukaryota														1
6922aeb779befedeae9033f98d1519b0	OTU_26	D_0__Eukaryota	D_1__SAR	D_2__Stramenopiles	D_3__Ochrophyta	D_4__Diatomea	D_5__Bacillariophytina	D_6__Mediophyceae	D_7__Minutocellus	D_8__uncultured Minutocellus	D_9__	D_10__	D_11__	D_12__	D_13__	D_14__	0.951372
e98db571f5d98b2f5087fcebc48efd49	OTU_27	D_0__Eukaryota	D_1__Opisthokonta	D_2__Holozoa	D_3__Metazoa (Animalia)	D_4__Eumetazoa	D_5__Bilateria	D_6__Annelida	D_7__Polychaeta	D_8__Palpata	D_9__Phyllodocida	D_10__Kefersteinia cirrata	D_11__	D_12__	D_13__	D_14__	0.981521
3f1d9f1800bf5975058d82326a885d1a	OTU_28	D_0__Eukaryota	D1_Unindentified_Eukaryota														1
f48a7a2d81dbfb9ee5c08c255d07e60e	OTU_29	D_0__Eukaryota	D_1__Opisthokonta	D_2__Holozoa	D_3__Metazoa (Animalia)	D_4__Eumetazoa	D_5__Bilateria										1
3a0c19f5355c37dac277fa383b30118b	OTU_30	D_0__Eukaryota	D_1__Opisthokonta	D_2__Holozoa	D_3__Metazoa (Animalia)	D_4__Eumetazoa	D_5__Bilateria	D_6__Chordata	D_7__Tunicata	D_8__Appendicularia	D_9__Copelata	D_10__Oikopleuridae	D_11__uncultured eukaryote	D_12__	D_13__	D_14__	0.89868
b23f2a4002debf6ab3a24130c176f8de	OTU_31	D_0__Eukaryota	D_1__Opisthokonta	D_2__Holozoa	D_3__Metazoa (Animalia)	D_4__Eumetazoa	D_5__Bilateria	D_6__Chordata	D_7__Tunicata	D_8__Appendicularia	D_9__Copelata	D_10__Oikopleuridae	D_11__uncultured eukaryote	D_12__	D_13__	D_14__	0.999245
d5b3cf7b11b289d32b83da4125116934	OTU_32	D_0__Eukaryota	D_1__Opisthokonta	D_2__Holozoa	D_3__Metazoa (Animalia)	D_4__Eumetazoa	D_5__Bilateria	D_6__Arthropoda	D_7__Crustacea	D_8__Maxillopoda	D_9__Copepoda						0.976766
8f98c1c13d38d3d080a758f908222968	OTU_33	D_0__Eukaryota	D_1__SAR	D_2__Stramenopiles	D_3__Ochrophyta	D_4__Diatomea	D_5__Bacillariophytina	D_6__Bacillariophyceae									0.981063
81fd34670ab5bced282f49c7ac35e59c	OTU_34	D_0__Eukaryota	D_1__Opisthokonta	D_2__Holozoa	D_3__Metazoa (Animalia)	D_4__Eumetazoa	D_5__Bilateria	D_6__Arthropoda	D_7__Crustacea	D_8__Maxillopoda	D_9__Copepoda	D_10__Cyclopoida	D_11__Oithona sp. 2 New Caledonia-RJH-2004	D_12__	D_13__	D_14__	0.766349
8f3598ec31b4e219c8a9623f8da9c2ae	OTU_35	D_0__Eukaryota	D_1__Opisthokonta	D_2__Holozoa	D_3__Metazoa (Animalia)	D_4__Eumetazoa	D_5__Bilateria	D_6__Annelida	D_7__Polychaeta								0.788759
d749cc7dc24627de9b19d5d2806b95cb	OTU_36	D_0__Eukaryota	D_1__SAR	D_2__Alveolata	D_3__Protalveolata	D_4__Syndiniales	D_5__Syndiniales Group I	D_6__uncultured Duboscquella	D_7__	D_8__	D_9__	D_10__	D_11__	D_12__	D_13__	D_14__	0.999973
d06066c557ac3be9a25b76362c4ae8b4	OTU_37	D_0__Eukaryota	D_1__Opisthokonta	D_2__Holozoa	D_3__Metazoa (Animalia)	D_4__Eumetazoa	D_5__Bilateria	D_6__uncultured	D_7__uncultured eukaryote	D_8__	D_9__	D_10__	D_11__	D_12__	D_13__	D_14__	0.924722
af2d20002e8ea63f5f6dad79ad68eeb8	OTU_38	D_0__Eukaryota	D1_Unindentified_Eukaryota														1
f4880d48cee8834f1e5bfbf63293ac6f	OTU_39	D_0__Eukaryota	D1_Unindentified_Eukaryota														1
de04b52c713c2e40e13c359131035391	OTU_40	D_0__Eukaryota	D_1__SAR	D_2__Alveolata	D_3__Dinoflagellata	D_4__Dinophyceae											0.888479
61956237849d076acba6b493a91fd577	OTU_41	D_0__Eukaryota	D_1__SAR	D_2__Alveolata	D_3__Dinoflagellata	D_4__Dinophyceae	D_5__Gymnodiniphycidae	D_6__Gymnodinium clade									0.711879
a70614eb21a37ad068e97c71f3dcce2b	OTU_42	D_0__Eukaryota	D_1__Opisthokonta	D_2__Holozoa	D_3__Metazoa (Animalia)	D_4__Eumetazoa	D_5__Bilateria	D_6__Arthropoda	D_7__Crustacea	D_8__Maxillopoda	D_9__Copepoda						0.978786
b970d8460f2c424eb93c7c4f9b2f0275	OTU_43	D_0__Eukaryota	D_1__SAR	D_2__Alveolata													0.993221
8e579b42f3f7a2183c7e089fba273061	OTU_44	D_0__Eukaryota	D1_Unindentified_Eukaryota														1
027eb3b2396f93c16e40b6dd9e4ed8e2	OTU_45	D_0__Eukaryota	D_1__Opisthokonta	D_2__Holozoa	D_3__Metazoa (Animalia)	D_4__Eumetazoa	D_5__Bilateria	D_6__Chordata	D_7__Vertebrata	D_8__Gnathostomata	D_9__Euteleostomi	D_10__Tetrapoda	D_11__Mammalia				0.996345
96a2bd7f8ed8a07838609e6da51dc319	OTU_46	D_0__Eukaryota	D_1__SAR	D_2__Alveolata	D_3__Apicomplexa	D_4__Novel Apicomplexa Class 2	D_5__Gregarinasina gen. sp. 1 KCW-2013	D_6__	D_7__	D_8__	D_9__	D_10__	D_11__	D_12__	D_13__	D_14__	0.79002
f8b337276172a5bc3b2a06f154963ab8	OTU_47	D_0__Eukaryota	D_1__Opisthokonta	D_2__Holozoa	D_3__Metazoa (Animalia)	D_4__Eumetazoa	D_5__Bilateria	D_6__Arthropoda	D_7__Crustacea	D_8__Maxillopoda	D_9__Copepoda	D_10__Calanoida	D_11__uncultured eukaryote	D_12__	D_13__	D_14__	0.997522
722b10075df446996fe9776183fe4d88	OTU_48	D_0__Eukaryota	D_1__Archaeplastida	D_2__Chloroplastida	D_3__Chlorophyta	D_4__Mamiellophyceae	D_5__Mamiellales	D_6__Micromonas	D_7__uncultured Chlorophyta	D_8__	D_9__	D_10__	D_11__	D_12__	D_13__	D_14__	0.88274
b36087bd0c97945325c750e8e3497fab	OTU_49	D_0__Eukaryota	D_1__SAR	D_2__Stramenopiles	D_3__MAST-3	D_4__MAST-3C											1
1d634dc438e390a4d653fc97f3bdc5df	OTU_50	D_0__Eukaryota	D_1__SAR	D_2__Alveolata	D_3__Dinoflagellata	D_4__Dinophyceae	D_5__Gymnodiniphycidae	D_6__Gymnodinium clade									0.84032
2aac586f2e70d1ebda1d41570f7e4bf3	OTU_51	D_0__Eukaryota	D_1__Opisthokonta	D_2__Nucletmycea	D_3__Fungi	D_4__Dikarya	D_5__Basidiomycota	D_6__Ustilaginomycotina	D_7__Malasseziomycetes	D_8__Malasseziales	D_9__Malasseziaceae	D_10__Malassezia	D_11__Malassezia globosa CBS 7966	D_12__	D_13__	D_14__	0.912415
0722d37fec05a8c9d1c4901355578af3	OTU_52	D_0__Eukaryota	D_1__Opisthokonta	D_2__Holozoa	D_3__Metazoa (Animalia)	D_4__Eumetazoa	D_5__Bilateria	D_6__Xenacoelomorpha	D_7__Acoelomorpha	D_8__Acoela	D_9__Atriofronta polyvacuola	D_10__	D_11__	D_12__	D_13__	D_14__	1
6f46e3962aa6e3b51b95055185adb035	OTU_53	D_0__Eukaryota	D1_Unindentified_Eukaryota														1
4c024e9ef2d56737a7ab7f250942d2f7	OTU_54	D_0__Eukaryota	D_1__Opisthokonta	D_2__Holozoa	D_3__Metazoa (Animalia)	D_4__Eumetazoa	D_5__Bilateria	D_6__Arthropoda	D_7__Crustacea	D_8__Maxillopoda	D_9__Copepoda	D_10__Poecilostomatoida	D_11__uncultured eukaryote	D_12__	D_13__	D_14__	1
99f1032f27456dac95912cdfd2625a86	OTU_55	D_0__Eukaryota	D_1__Opisthokonta														0.963509
06419d18f26d2c3970d1f9bf018d56c9	OTU_56	D_0__Eukaryota	D_1__Opisthokonta	D_2__Holozoa	D_3__Metazoa (Animalia)	D_4__Eumetazoa	D_5__Bilateria	D_6__Chordata	D_7__Tunicata	D_8__Appendicularia	D_9__Copelata	D_10__Oikopleuridae	D_11__uncultured eukaryote	D_12__	D_13__	D_14__	0.901347
cc2f8e391cc24cd809d97b13a14ab217	OTU_57	D_0__Eukaryota	D_1__Opisthokonta	D_2__Holozoa	D_3__Metazoa (Animalia)	D_4__Porifera	D_5__Demospongiae	D_6__Suberitida	D_7__Terpios aploos	D_8__	D_9__	D_10__	D_11__	D_12__	D_13__	D_14__	0.999995
e9995cd9fb0061c7d97c6199992f300e	OTU_58	D_0__Eukaryota	D1_Unindentified_Eukaryota														1
12e5a74df6de34e711070c0caba6767e	OTU_59	D_0__Eukaryota	D_1__Opisthokonta	D_2__Holozoa	D_3__Metazoa (Animalia)	D_4__Eumetazoa	D_5__Bilateria	D_6__Xenacoelomorpha	D_7__Acoelomorpha	D_8__Acoela	D_9__Atriofronta polyvacuola	D_10__	D_11__	D_12__	D_13__	D_14__	1
a0c5b7585dca5ccbeb6312f232a3dfb0	OTU_60	D_0__Eukaryota	D1_Unindentified_Eukaryota														1
08ce68de5ceeab53c2aaf5d74c58be6a	OTU_61	D_0__Eukaryota	D_1__Opisthokonta	D_2__Holozoa	D_3__Metazoa (Animalia)	D_4__Eumetazoa	D_5__Bilateria	D_6__Echinodermata	D_7__Echinoidea								0.997412
0258f4bbe8e25b2de93192231c834efa	OTU_62	D_0__Eukaryota	D_1__Opisthokonta	D_2__Holozoa	D_3__Metazoa (Animalia)	D_4__Eumetazoa	D_5__Bilateria	D_6__Chordata	D_7__Tunicata	D_8__Appendicularia	D_9__Copelata	D_10__Oikopleuridae	D_11__uncultured metazoan	D_12__	D_13__	D_14__	0.965277
c4eccbcc8c278410e5e9e6267ee2a8aa	OTU_63	D_0__Eukaryota	D1_Unindentified_Eukaryota														1
7aa074d0f654ce07badbfd4d080fec5d	OTU_64	D_0__Eukaryota	D_1__Opisthokonta	D_2__Holozoa	D_3__Metazoa (Animalia)	D_4__Eumetazoa	D_5__Bilateria	D_6__Chordata	D_7__Tunicata	D_8__Appendicularia	D_9__Copelata	D_10__Oikopleuridae	D_11__uncultured metazoan	D_12__	D_13__	D_14__	0.999874
5f81202c6ed959e186db6a4185b15056	OTU_65	D_0__Eukaryota	D1_Unindentified_Eukaryota														1
cda0f94b11019ebbc5ede4ef26a53d56	OTU_66	D_0__Eukaryota	D_1__Opisthokonta	D_2__Holozoa	D_3__Metazoa (Animalia)	D_4__Eumetazoa	D_5__Bilateria	D_6__Arthropoda	D_7__Crustacea	D_8__Maxillopoda	D_9__Copepoda	D_10__Cyclopoida	D_11__Daphnia pulex (common water flea)	D_12__	D_13__	D_14__	0.798611
fe64b7fa29f623efc2073187fcf1e319	OTU_67	D_0__Eukaryota	D_1__Opisthokonta	D_2__Holozoa	D_3__Metazoa (Animalia)	D_4__Porifera	D_5__Demospongiae	D_6__Haplosclerida	D_7__Haliclona amboinensis	D_8__	D_9__	D_10__	D_11__	D_12__	D_13__	D_14__	0.999956
9ad3dd885d56ce61fe1794cfde5cf292	OTU_68	D_0__Eukaryota	D_1__SAR	D_2__Alveolata	D_3__Dinoflagellata	D_4__Dinophyceae											0.717371
126fa166c58279418ea9b4921cdd5835	OTU_69	D_0__Eukaryota	D_1__Opisthokonta														0.974848
8ace966310db9b90c612744400e81d69	OTU_70	D_0__Eukaryota	D_1__Opisthokonta	D_2__Holozoa	D_3__Metazoa (Animalia)	D_4__Eumetazoa	D_5__Cnidaria	D_6__Anthozoa	D_7__Hexacorallia	D_8__Scleractinia	D_9__Porites astreoides	D_10__	D_11__	D_12__	D_13__	D_14__	0.976385
b239f5ced91c39e5013ce858350082f0	OTU_71	D_0__Eukaryota	D_1__Archaeplastida	D_2__Chloroplastida	D_3__Chlorophyta	D_4__Clade VII	D_5__Subclade A	D_6__uncultured eukaryote	D_7__	D_8__	D_9__	D_10__	D_11__	D_12__	D_13__	D_14__	0.998847
e10d38a413cd75db3c9484bf78a79534	OTU_72	D_0__Eukaryota	D_1__Opisthokonta	D_2__Holozoa	D_3__Metazoa (Animalia)	D_4__Eumetazoa	D_5__Bilateria	D_6__Arthropoda	D_7__Crustacea	D_8__Maxillopoda	D_9__Copepoda	D_10__Harpacticoida	D_11__Tisbe sp. JSL-2009	D_12__	D_13__	D_14__	0.990025
f32cade589b4ae456d9f35c33ed9e250	OTU_73	D_0__Eukaryota	D_1__Opisthokonta	D_2__Holozoa	D_3__Metazoa (Animalia)	D_4__Eumetazoa	D_5__Bilateria	D_6__Mollusca	D_7__Bivalvia	D_8__Pteriomorphia	D_9__Mytiloida						0.99985
334bda51241d993f8ff8874ecd5d5926	OTU_74	D_0__Eukaryota	D_1__Opisthokonta	D_2__Holozoa	D_3__Metazoa (Animalia)	D_4__Eumetazoa	D_5__Bilateria	D_6__Arthropoda	D_7__Crustacea	D_8__Maxillopoda	D_9__Copepoda	D_10__uncultured eukaryote	D_11__	D_12__	D_13__	D_14__	0.978513
ded39488628e7ee625a76ea239c652b4	OTU_75	D_0__Eukaryota	D_1__Opisthokonta	D_2__Nucletmycea	D_3__Fungi	D_4__Dikarya	D_5__Basidiomycota	D_6__Agaricomycotina	D_7__Agaricomycetes	D_8__Agaricales							0.954938
8a69ef7d1961345c8c832383f3683a77	OTU_76	D_0__Eukaryota	D_1__Opisthokonta	D_2__Holozoa	D_3__Metazoa (Animalia)	D_4__Eumetazoa	D_5__Bilateria	D_6__Arthropoda	D_7__Crustacea	D_8__Maxillopoda	D_9__Copepoda	D_10__Calanoida	D_11__uncultured eukaryote	D_12__	D_13__	D_14__	0.999165
d7e915be97685c2ea24fbf30bc61e057	OTU_77	D_0__Eukaryota	D_1__SAR	D_2__Stramenopiles	D_3__Ochrophyta	D_4__Diatomea											0.976465
4ff6e37214fcb3404c13f9d35b7486fe	OTU_78	D_0__Eukaryota	D1_Unindentified_Eukaryota														1
d6ca3688968012739af14979fc5d8314	OTU_79	D_0__Eukaryota	D1_Unindentified_Eukaryota														1
70f2355e0e8fa768a2d5ac68669b8cd9	OTU_80	D_0__Eukaryota	D_1__Opisthokonta	D_2__Holozoa	D_3__Metazoa (Animalia)	D_4__Eumetazoa	D_5__Bilateria	D_6__Arthropoda	D_7__Crustacea	D_8__Maxillopoda	D_9__Copepoda	D_10__Calanoida	D_11__uncultured eukaryote	D_12__	D_13__	D_14__	0.805916
53cc82a0813174d496331428af8882f6	OTU_81	D_0__Eukaryota	D_1__Opisthokonta	D_2__Holozoa	D_3__Metazoa (Animalia)	D_4__Eumetazoa	D_5__Bilateria										0.999982
6e29fd15eba350136138dccd5f04513f	OTU_82	D_0__Eukaryota	D_1__SAR	D_2__Stramenopiles	D_3__MAST-4	D_4__uncultured stramenopile	D_5__	D_6__	D_7__	D_8__	D_9__	D_10__	D_11__	D_12__	D_13__	D_14__	0.999197
1354f7ca448c23e77aa35bce708fb1ba	OTU_83	D_0__Eukaryota	D_1__Opisthokonta	D_2__Holozoa	D_3__Metazoa (Animalia)	D_4__Porifera	D_5__Demospongiae	D_6__Suberitida	D_7__Terpios aploos	D_8__	D_9__	D_10__	D_11__	D_12__	D_13__	D_14__	0.996358
6fa1d8b948fcf59e7c2fb7662eaaaba3	OTU_84	D_0__Eukaryota	D_1__Opisthokonta	D_2__Holozoa	D_3__Metazoa (Animalia)	D_4__Eumetazoa	D_5__Bilateria	D_6__Chordata	D_7__Vertebrata	D_8__Gnathostomata	D_9__Euteleostomi	D_10__Actinopterygii	D_11__Neopterygii	D_12__Teleostei			0.793028
4be1f8ce16dc8a30c45e24ceadc20de0	OTU_85	D_0__Eukaryota	D_1__Opisthokonta	D_2__Holozoa	D_3__Metazoa (Animalia)	D_4__Eumetazoa											0.839432
277d1435a903794a72037a03e949aeda	OTU_86	D_0__Eukaryota	D1_Unindentified_Eukaryota														1
4f76f8ce021691736331ed22e88b9e7b	OTU_87	D_0__Eukaryota	D_1__SAR	D_2__Rhizaria	D_3__Retaria												1
855e43af267ab6a6817f6ea8b557b9d1	OTU_88	D_0__Eukaryota	D_1__Opisthokonta	D_2__Holozoa	D_3__Metazoa (Animalia)	D_4__Eumetazoa	D_5__Bilateria	D_6__Arthropoda	D_7__Crustacea	D_8__Maxillopoda	D_9__Copepoda	D_10__Cyclopoida					0.919197
cac8c82974e586b857b10888cb83c508	OTU_89	D_0__Eukaryota	D1_Unindentified_Eukaryota														1
e65efaabd97257a5e003f8cde25c102e	OTU_90	D_0__Eukaryota	D1_Unindentified_Eukaryota														1
d46b45039a84d480081c9d12f0e64926	OTU_91	D_0__Eukaryota	D_1__Opisthokonta	D_2__Holozoa	D_3__Metazoa (Animalia)	D_4__Eumetazoa	D_5__Bilateria	D_6__Arthropoda	D_7__Crustacea	D_8__Maxillopoda	D_9__Copepoda	D_10__Cyclopoida	D_11__uncultured eukaryote	D_12__	D_13__	D_14__	0.999716
45cbaccedd9c89ef578572ac045ff071	OTU_92	D_0__Eukaryota	D_1__Opisthokonta	D_2__Holozoa	D_3__Metazoa (Animalia)	D_4__Porifera	D_5__Demospongiae	D_6__Suberitida	D_7__Terpios aploos	D_8__	D_9__	D_10__	D_11__	D_12__	D_13__	D_14__	0.948213
80b7af71ab83a18c672415b0759b21e0	OTU_93	D_0__Eukaryota	D_1__Incertae Sedis	D_2__Telonema													0.995486
af2cb8cf5cc50980d3c53fd51e3693d8	OTU_94	D_0__Eukaryota	D_1__SAR	D_2__Stramenopiles	D_3__Ochrophyta	D_4__Diatomea	D_5__Bacillariophytina	D_6__Bacillariophyceae	D_7__Navicula								0.711387
093d26cb65f77bb02650e11561bea626	OTU_95	D_0__Eukaryota	D_1__Opisthokonta	D_2__Holozoa	D_3__Metazoa (Animalia)	D_4__Eumetazoa	D_5__Bilateria	D_6__Chordata	D_7__Vertebrata	D_8__Gnathostomata	D_9__Euteleostomi	D_10__Actinopterygii	D_11__Neopterygii	D_12__Teleostei			0.980209
78f63e3c7d82712a7d7cb2f07e08ead8	OTU_96	D_0__Eukaryota	D_1__SAR	D_2__Stramenopiles	D_3__Ochrophyta	D_4__Diatomea	D_5__Bacillariophytina	D_6__Bacillariophyceae									0.997986
b703d1273db5cd0b02d66cfa2cf48d22	OTU_97	D_0__Eukaryota	D_1__SAR	D_2__Alveolata	D_3__Dinoflagellata	D_4__Dinophyceae	D_5__Gymnodiniphycidae	D_6__Gyrodinium	D_7__uncultured eukaryote	D_8__	D_9__	D_10__	D_11__	D_12__	D_13__	D_14__	0.830519
74473fa7fd3ae6c234dddac22a0a693d	OTU_98	D_0__Eukaryota	D_1__Opisthokonta	D_2__Nucletmycea	D_3__Fungi	D_4__Dikarya	D_5__Basidiomycota	D_6__Agaricomycotina	D_7__Agaricomycetes	D_8__Agaricales	D_9__Schizophyllaceae	D_10__Schizophyllum	D_11__Schizophyllum commune	D_12__	D_13__	D_14__	0.944496
b058f7652aa090ef670983f3d93d2823	OTU_99	D_0__Eukaryota	D_1__SAR	D_2__Stramenopiles	D_3__Ochrophyta	D_4__Diatomea	D_5__Bacillariophytina	D_6__Bacillariophyceae									0.998581
eb70985d865a28cbd73218abf48d4f14	OTU_100	D_0__Eukaryota	D_1__Opisthokonta	D_2__Holozoa	D_3__Metazoa (Animalia)	D_4__Eumetazoa	D_5__Bilateria	D_6__Gastrotricha	D_7__Chaetonotida								0.83354
f256dddbbbecf213bc2346218bbef0e1	OTU_101	D_0__Eukaryota	D_1__Opisthokonta	D_2__Holozoa	D_3__Metazoa (Animalia)	D_4__Eumetazoa	D_5__Bilateria	D_6__Xenacoelomorpha	D_7__Acoelomorpha	D_8__Acoela	D_9__Atriofronta polyvacuola	D_10__	D_11__	D_12__	D_13__	D_14__	1
194615fb44d953870ef0fb08b199e5f6	OTU_102	D_0__Eukaryota	D_1__Opisthokonta	D_2__Holozoa	D_3__Metazoa (Animalia)	D_4__Eumetazoa	D_5__Bilateria	D_6__Arthropoda	D_7__Crustacea	D_8__Maxillopoda	D_9__Copepoda	D_10__Harpacticoida					0.995408
6f99be91593a9df314f0f5b303a3cc67	OTU_103	D_0__Eukaryota	D_1__SAR	D_2__Alveolata	D_3__Dinoflagellata	D_4__Dinophyceae											0.745462
d41afd7606a86b7606788f74759fcb1e	OTU_104	D_0__Eukaryota	D_1__Haptophyta	D_2__Prymnesiophyceae	D_3__Prymnesiales	D_4__Chrysochromulina	D_5__uncultured marine picoeukaryote	D_6__	D_7__	D_8__	D_9__	D_10__	D_11__	D_12__	D_13__	D_14__	0.999948
91e68bde561d9844545b2b0ef25c3ef9	OTU_105	D_0__Eukaryota	D1_Unindentified_Eukaryota														1
a7a0b7fb9a5c38a8ae7d50ad12f3c7fb	OTU_106	D_0__Eukaryota	D_1__SAR	D_2__Alveolata	D_3__Protalveolata	D_4__Syndiniales	D_5__uncultured Duboscquella	D_6__	D_7__	D_8__	D_9__	D_10__	D_11__	D_12__	D_13__	D_14__	0.996583
9a47ab2dce0b365df0e15b4ad7b0ca56	OTU_107	D_0__Eukaryota	D1_Unindentified_Eukaryota														1
9ff4b91286cd5682d2b602ce82182ab5	OTU_108	D_0__Eukaryota	D_1__SAR	D_2__Alveolata	D_3__Protalveolata	D_4__Syndiniales	D_5__Syndiniales Group I	D_6__Karlodinium veneficum	D_7__	D_8__	D_9__	D_10__	D_11__	D_12__	D_13__	D_14__	0.87542
b5046c77ee755988f85bb24a2b2faaf3	OTU_109	D_0__Eukaryota	D1_Unindentified_Eukaryota														1
16f3a0c5927e9c96ddb73e15c9d5ccf5	OTU_110	D_0__Eukaryota	D_1__SAR	D_2__Rhizaria	D_3__Retaria	D_4__Foraminifera	D_5__Globothalamea	D_6__Rotaliida									0.999972
33ec6f53f099e8bb825f461f29a42aa8	OTU_111	D_0__Eukaryota	D_1__SAR	D_2__Rhizaria	D_3__Retaria	D_4__RAD B	D_5__uncultured Polycystinea	D_6__	D_7__	D_8__	D_9__	D_10__	D_11__	D_12__	D_13__	D_14__	0.999981
3282f38b567b98353607d60a96fa6368	OTU_112	D_0__Eukaryota	D_1__Opisthokonta	D_2__Holozoa	D_3__Metazoa (Animalia)	D_4__Eumetazoa	D_5__Bilateria	D_6__Arthropoda	D_7__Crustacea	D_8__Maxillopoda	D_9__Copepoda	D_10__Cyclopoida	D_11__Oithona sp. 2 New Caledonia-RJH-2004	D_12__	D_13__	D_14__	0.991391
b9931d30b68f8ef239180ae566e49905	OTU_113	D_0__Eukaryota	D_1__Opisthokonta	D_2__Holozoa	D_3__Metazoa (Animalia)	D_4__Eumetazoa	D_5__Bilateria	D_6__Annelida	D_7__uncultured metazoan	D_8__	D_9__	D_10__	D_11__	D_12__	D_13__	D_14__	0.999052
f214cd63f64bf7e2f0675272b5859eed	OTU_114	D_0__Eukaryota	D_1__Opisthokonta	D_2__Nucletmycea	D_3__Fungi	D_4__Dikarya	D_5__Ascomycota	D_6__Pezizomycotina	D_7__Dothideomycetes	D_8__Capnodiales	D_9__Cladosporiaceae	D_10__Cladosporium					0.738447
e0978f0d21eed94eeb18ad2be230e054	OTU_115	D_0__Eukaryota	D_1__Opisthokonta	D_2__Holozoa	D_3__Metazoa (Animalia)	D_4__Eumetazoa	D_5__Bilateria	D_6__Xenacoelomorpha	D_7__Acoelomorpha	D_8__Acoela							0.936481
25c6a1557ad98f6bdf85566c5bd3e72c	OTU_116	D_0__Eukaryota	D_1__SAR	D_2__Alveolata	D_3__Dinoflagellata	D_4__Dinophyceae	D_5__Gymnodiniphycidae	D_6__Gymnodinium clade	D_7__Gymnodinium	D_8__Lepidodinium viride	D_9__	D_10__	D_11__	D_12__	D_13__	D_14__	0.723729
292a02925111a65e53fa10d1dc4d52a5	OTU_117	D_0__Eukaryota	D1_Unindentified_Eukaryota														1
c37bd9469e106d81a589b4a2fdc30778	OTU_118	D_0__Eukaryota	D_1__Opisthokonta	D_2__Holozoa	D_3__Metazoa (Animalia)	D_4__Eumetazoa	D_5__Bilateria	D_6__Platyhelminthes	D_7__Rhabditophora	D_8__Mediofusata	D_9__Urastomidae	D_10__Urastoma cyprinae	D_11__	D_12__	D_13__	D_14__	0.991856
afa8ebb854c6f59e664ce31adb09f32b	OTU_119	D_0__Eukaryota	D_1__Opisthokonta	D_2__Nucletmycea	D_3__Fungi	D_4__Dikarya	D_5__Ascomycota	D_6__Pezizomycotina	D_7__Eurotiomycetes	D_8__Eurotiales	D_9__Aspergillaceae	D_10__Aspergillus	D_11__Aspergillus penicillioides	D_12__	D_13__	D_14__	0.978845
cf237ec393f28a0f1a8781ee2002361e	OTU_120	D_0__Eukaryota	D1_Unindentified_Eukaryota														1
aa8fa2fcf0ce38ddaae09be11a263876	OTU_121	D_0__Eukaryota	D1_Unindentified_Eukaryota														1
f96b8508558e997b77d4c1193d2cd70b	OTU_122	D_0__Eukaryota	D_1__Opisthokonta	D_2__Holozoa	D_3__Metazoa (Animalia)												0.989707
3570a2dd74c3ea68669ab2763fdac53f	OTU_123	D_0__Eukaryota	D_1__Opisthokonta	D_2__Holozoa	D_3__Metazoa (Animalia)	D_4__Eumetazoa	D_5__Bilateria	D_6__Annelida	D_7__Polychaeta	D_8__Scolecida	D_9__Spionida	D_10__Boccardiella ligerica	D_11__	D_12__	D_13__	D_14__	0.999627
1684f41a1a265b7bda977ed36be276df	OTU_124	D_0__Eukaryota	D_1__Archaeplastida	D_2__Chloroplastida	D_3__Chlorophyta	D_4__Chlorodendrophyceae	D_5__Chlorodendrales	D_6__Tetraselmis	D_7__Tetraselmis chuii	D_8__	D_9__	D_10__	D_11__	D_12__	D_13__	D_14__	0.87622
a7dda8552dbfa2bb82f5243834d90f6e	OTU_125	D_0__Eukaryota	D_1__SAR	D_2__Stramenopiles	D_3__Ochrophyta	D_4__Diatomea	D_5__Bacillariophytina	D_6__Bacillariophyceae	D_7__Fragilariopsis	D_8__uncultured eukaryote	D_9__	D_10__	D_11__	D_12__	D_13__	D_14__	0.721055
a57d6ec08d34af420203d45a99b15d7b	OTU_126	D_0__Eukaryota	D_1__Opisthokonta	D_2__Holozoa	D_3__Metazoa (Animalia)	D_4__Eumetazoa	D_5__Bilateria	D_6__Chordata	D_7__Tunicata	D_8__Ascidiacea	D_9__Stolidobranchia	D_10__Pyura gangelion	D_11__	D_12__	D_13__	D_14__	0.976675
4c8f952b0a8849de02bad30f37bec7bf	OTU_127	D_0__Eukaryota	D_1__SAR	D_2__Alveolata	D_3__Dinoflagellata	D_4__Dinophyceae	D_5__Prorocentrales	D_6__Prorocentrum									0.999747
777fcd3e67121b1e8c11f1f3faf14bcf	OTU_128	D_0__Eukaryota	D_1__Opisthokonta	D_2__Nucletmycea	D_3__Fungi	D_4__Dikarya	D_5__Basidiomycota	D_6__Agaricomycotina	D_7__Agaricomycetes	D_8__Boletales	D_9__Serpulaceae	D_10__Serpula	D_11__Serpula similis	D_12__	D_13__	D_14__	0.918652
841ee0bd11e913f3b3a71dc2239bd5fa	OTU_129	D_0__Eukaryota	D1_Unindentified_Eukaryota														1
9c745abb61c01676fc8bc4d8dd5bf060	OTU_130	D_0__Eukaryota	D_1__Archaeplastida	D_2__Chloroplastida	D_3__Chlorophyta	D_4__Mamiellophyceae	D_5__Mamiellales	D_6__Bathycoccus	D_7__Bathycoccus prasinos	D_8__	D_9__	D_10__	D_11__	D_12__	D_13__	D_14__	0.906501
cf07ae5d599b7121784e7baff04b621b	OTU_131	D_0__Eukaryota	D_1__Opisthokonta	D_2__Holozoa	D_3__Metazoa (Animalia)	D_4__Eumetazoa	D_5__Bilateria	D_6__Annelida	D_7__Polychaeta	D_8__Scolecida	D_9__Opheliidae	D_10__Ophelina acuminata	D_11__	D_12__	D_13__	D_14__	0.937998
046a2e6c1cbac607a55e0293f7fdcc38	OTU_132	D_0__Eukaryota	D1_Unindentified_Eukaryota														1
2e45c41bffe08b45bc59f22f369ec6ad	OTU_133	D_0__Eukaryota	D_1__Opisthokonta	D_2__Holozoa	D_3__Metazoa (Animalia)	D_4__Eumetazoa	D_5__Bilateria	D_6__Arthropoda	D_7__Crustacea	D_8__Maxillopoda	D_9__Copepoda	D_10__Calanoida	D_11__uncultured eukaryote	D_12__	D_13__	D_14__	0.999097
637073e653713f7f1f1eb5bb6f98b9b9	OTU_134	D_0__Eukaryota	D_1__SAR	D_2__Stramenopiles	D_3__Ochrophyta	D_4__Diatomea	D_5__Coscinodiscophytina	D_6__Rhizosolenids	D_7__Leptocylindrus	D_8__Leptocylindrus danicus	D_9__	D_10__	D_11__	D_12__	D_13__	D_14__	0.999999
1aa9e2ef771627ba62260bc52cf67a05	OTU_135	D_0__Eukaryota	D_1__Opisthokonta	D_2__Holozoa	D_3__Metazoa (Animalia)	D_4__Eumetazoa	D_5__Bilateria	D_6__Annelida	D_7__Polychaeta	D_8__Palpata	D_9__Phyllodocida	D_10__Kefersteinia cirrata	D_11__	D_12__	D_13__	D_14__	0.842511
131aed55d563361c22730eb1ffc9f3ff	OTU_136	D_0__Eukaryota	D_1__SAR	D_2__Alveolata	D_3__Protalveolata	D_4__Syndiniales	D_5__Syndiniales Group I	D_6__Karlodinium veneficum	D_7__	D_8__	D_9__	D_10__	D_11__	D_12__	D_13__	D_14__	0.933575
599acc362ec14e2ff9750d9a63ee9297	OTU_137	D_0__Eukaryota	D_1__Opisthokonta	D_2__Holozoa	D_3__Metazoa (Animalia)	D_4__Eumetazoa	D_5__Bilateria	D_6__Chordata	D_7__Tunicata	D_8__Ascidiacea	D_9__Stolidobranchia						0.999819
e3f6187b3d8bc92789e002c4d4631567	OTU_138	D_0__Eukaryota	D_1__SAR	D_2__Alveolata	D_3__Dinoflagellata	D_4__Dinophyceae	D_5__Gymnodiniphycidae	D_6__Gymnodinium clade	D_7__Erythropsidinium	D_8__uncultured eukaryote	D_9__	D_10__	D_11__	D_12__	D_13__	D_14__	0.795834
72e5c2936daf8a249271790e32ec5116	OTU_139	D_0__Eukaryota	D_1__SAR	D_2__Alveolata	D_3__Protalveolata	D_4__Syndiniales	D_5__Syndiniales Group I										0.999148
70336b93e428d2326affe50c1bd1b559	OTU_140	D_0__Eukaryota	D_1__SAR	D_2__Alveolata	D_3__Dinoflagellata	D_4__Dinophyceae	D_5__Peridiniphycidae	D_6__Thoracosphaeraceae	D_7__Scrippsiella								0.75803
7bf3395a832cfcc18138874a7851b30c	OTU_141	D_0__Eukaryota	D_1__SAR	D_2__Rhizaria	D_3__Retaria	D_4__RAD A	D_5__uncultured eukaryote	D_6__	D_7__	D_8__	D_9__	D_10__	D_11__	D_12__	D_13__	D_14__	0.944646
b66c546b58a24b04ba2669a9a1149234	OTU_142	D_0__Eukaryota	D1_Unindentified_Eukaryota														1
cd0fddf8559170ad4baa0baa46f4db4a	OTU_143	D_0__Eukaryota	D_1__Opisthokonta	D_2__Holozoa	D_3__Metazoa (Animalia)	D_4__Eumetazoa	D_5__Bilateria	D_6__Annelida	D_7__Polychaeta	D_8__Palpata	D_9__Phyllodocida	D_10__Sphaerosyllis hirsuta	D_11__	D_12__	D_13__	D_14__	0.772754
0f9cca677bf9f05d500338e4344356af	OTU_144	D_0__Eukaryota	D_1__SAR	D_2__Alveolata	D_3__Dinoflagellata	D_4__Incertae Sedis	D_5__Haplozoon	D_6__uncultured eukaryote	D_7__	D_8__	D_9__	D_10__	D_11__	D_12__	D_13__	D_14__	0.963181
a4660a2e5301c2acd9ec3568445a1aa4	OTU_145	D_0__Eukaryota	D_1__Opisthokonta	D_2__Holozoa	D_3__Metazoa (Animalia)	D_4__Eumetazoa	D_5__Bilateria	D_6__Annelida	D_7__Polychaeta	D_8__Scolecida	D_9__Spionida						0.999998
3ed3600989372665b604e5c9545c73e8	OTU_146	D_0__Eukaryota	D_1__Opisthokonta	D_2__Holozoa	D_3__Metazoa (Animalia)	D_4__Eumetazoa	D_5__Bilateria										1
e3292d6eb99a56d273ec275dc9ca7671	OTU_147	D_0__Eukaryota	D_1__SAR	D_2__Alveolata	D_3__Protalveolata	D_4__Syndiniales	D_5__Duboscquella	D_6__uncultured eukaryote	D_7__	D_8__	D_9__	D_10__	D_11__	D_12__	D_13__	D_14__	0.999979
480e11709b2728e65572ffe4601cb70b	OTU_148	D_0__Eukaryota	D_1__SAR	D_2__Alveolata													0.919608
b4516dbe0130f4ff53180fe7f7e1c4dd	OTU_149	D_0__Eukaryota	D_1__SAR	D_2__Alveolata	D_3__Dinoflagellata	D_4__Dinophyceae	D_5__Gymnodiniphycidae										0.98192
9914d1d30791373678ba36618327d74f	OTU_150	D_0__Eukaryota	D1_Unindentified_Eukaryota														1
1e5ce0ed51e3d827258d456f9a1d9445	OTU_151	D_0__Eukaryota	D_1__SAR	D_2__Alveolata	D_3__Dinoflagellata												0.997711
363727d815f898929e21efc0f4c3a704	OTU_152	D_0__Eukaryota	D_1__Incertae Sedis	D_2__Telonema	D_3__uncultured eukaryote	D_4__	D_5__	D_6__	D_7__	D_8__	D_9__	D_10__	D_11__	D_12__	D_13__	D_14__	0.983289
ff93b0d03d4e3063bb9cc1dcc6ff8a5e	OTU_153	D_0__Eukaryota	D_1__Opisthokonta	D_2__Holozoa	D_3__Metazoa (Animalia)	D_4__Eumetazoa	D_5__Bilateria	D_6__Arthropoda	D_7__Crustacea	D_8__Maxillopoda	D_9__Copepoda	D_10__Cyclopoida	D_11__Cyclopina gracilis	D_12__	D_13__	D_14__	0.752394
353ae7bd38c1a57cfdf82f01a4adf76f	OTU_154	D_0__Eukaryota	D_1__SAR	D_2__Stramenopiles	D_3__Ochrophyta	D_4__Pelagophyceae	D_5__uncultured eukaryote	D_6__	D_7__	D_8__	D_9__	D_10__	D_11__	D_12__	D_13__	D_14__	0.998252
22a6432bbb6e7c253dc68ed6000602e6	OTU_155	D_0__Eukaryota	D_1__SAR	D_2__Alveolata													0.833104
1b6fc72ec7cdd5234f31dc073191e8bb	OTU_156	D_0__Eukaryota	D_1__Opisthokonta	D_2__Holozoa	D_3__Metazoa (Animalia)	D_4__Eumetazoa	D_5__Bilateria	D_6__Annelida	D_7__Polychaeta	D_8__Palpata	D_9__Phyllodocida	D_10__Kefersteinia cirrata	D_11__	D_12__	D_13__	D_14__	0.728268
1df7c7230b01e01365fe8c22c50e9323	OTU_157	D_0__Eukaryota	D_1__Picozoa	D_2__Picomonadida	D_3__Picomonadidae	D_4__Picomonas											0.960857
fe732fec8b5b4d346453d34feeb0be0c	OTU_158	D_0__Eukaryota	D_1__Opisthokonta	D_2__Holozoa	D_3__Metazoa (Animalia)	D_4__Eumetazoa	D_5__Bilateria	D_6__Arthropoda	D_7__Crustacea	D_8__Maxillopoda	D_9__Copepoda	D_10__Harpacticoida					0.767547
645c96442f37330bc32a2963aec3d86b	OTU_159	D_0__Eukaryota	D_1__Opisthokonta														0.952438
8681aff09ad4cf09b32cd0acd2864f0b	OTU_160	D_0__Eukaryota	D_1__SAR	D_2__Rhizaria	D_3__Retaria	D_4__uncultured	D_5__uncultured marine eukaryote	D_6__	D_7__	D_8__	D_9__	D_10__	D_11__	D_12__	D_13__	D_14__	0.704768
af21d97d96cd65af26bc355b72107fd9	OTU_161	D_0__Eukaryota	D_1__SAR	D_2__Stramenopiles	D_3__MAST-1	D_4__MAST-1D	D_5__uncultured stramenopile	D_6__	D_7__	D_8__	D_9__	D_10__	D_11__	D_12__	D_13__	D_14__	0.99968
573e766a026a45abcee13bffb13819e5	OTU_162	D_0__Eukaryota	D1_Unindentified_Eukaryota														1
46a7445d5c84381832d5e4c623e3605a	OTU_163	D_0__Eukaryota	D_1__SAR	D_2__Stramenopiles													0.998017
0c21acac4063e4cfe181590bc8eb11fe	OTU_164	D_0__Eukaryota	D_1__SAR	D_2__Alveolata	D_3__Dinoflagellata	D_4__Dinophyceae	D_5__Gymnodiniphycidae	D_6__Kareniaceae									0.703689
ff5e9218c35a7ab7f7c3e2934f5bdffa	OTU_165	D_0__Eukaryota	D_1__SAR	D_2__Stramenopiles	D_3__Ochrophyta	D_4__Diatomea	D_5__Bacillariophytina	D_6__Bacillariophyceae	D_7__Catenulaceae sp. 97	D_8__	D_9__	D_10__	D_11__	D_12__	D_13__	D_14__	0.872114
5f7e2658e7ab9413de2bf08a815f8c47	OTU_166	D_0__Eukaryota	D_1__SAR	D_2__Alveolata	D_3__Protalveolata	D_4__Syndiniales	D_5__Syndiniales Group I	D_6__uncultured eukaryote	D_7__	D_8__	D_9__	D_10__	D_11__	D_12__	D_13__	D_14__	0.963914
3a78dd323a6cb3328636f6b777791d52	OTU_167	D_0__Eukaryota	D_1__SAR	D_2__Stramenopiles	D_3__MAST-7	D_4__MAST-7B	D_5__uncultured stramenopile	D_6__	D_7__	D_8__	D_9__	D_10__	D_11__	D_12__	D_13__	D_14__	0.9212
f842cb47d68db70d167d3580c11023a5	OTU_168	D_0__Eukaryota	D_1__Opisthokonta	D_2__Holozoa	D_3__Metazoa (Animalia)	D_4__Eumetazoa	D_5__Bilateria	D_6__Annelida	D_7__Polychaeta	D_8__Scolecida	D_9__Terebellida						0.956849
1f8d0dcf432a407186dcb8b3a76fab99	OTU_169	D_0__Eukaryota	D_1__SAR	D_2__Alveolata	D_3__Protalveolata	D_4__Syndiniales	D_5__Syndiniales Group I	D_6__uncultured Duboscquella	D_7__	D_8__	D_9__	D_10__	D_11__	D_12__	D_13__	D_14__	1
c9f6341bea6e5cb314de37dc7506701d	OTU_170	D_0__Eukaryota	D1_Unindentified_Eukaryota														1
5c54c6f4578c5940a61be766caed3105	OTU_171	D_0__Eukaryota	D1_Unindentified_Eukaryota														1
389ba1c56b6afdccc3f624a36f2552fa	OTU_172	D_0__Eukaryota	D_1__SAR	D_2__Stramenopiles	D_3__MAST-4	D_4__uncultured stramenopile	D_5__	D_6__	D_7__	D_8__	D_9__	D_10__	D_11__	D_12__	D_13__	D_14__	0.999995
14a018aed44dbed07b29335b17143298	OTU_173	D_0__Eukaryota	D_1__SAR	D_2__Alveolata	D_3__Protalveolata	D_4__Syndiniales	D_5__Syndiniales Group I	D_6__uncultured eukaryote	D_7__	D_8__	D_9__	D_10__	D_11__	D_12__	D_13__	D_14__	0.810855
d5374d4685f394b5980ba7c1164f2ad2	OTU_174	D_0__Eukaryota	D_1__SAR	D_2__Rhizaria	D_3__Retaria	D_4__RAD B											0.999996
c26f02ce7bfe66ee9493593a9dce124c	OTU_175	D_0__Eukaryota	D_1__SAR	D_2__Rhizaria	D_3__Retaria	D_4__Acantharia											0.854033
608b6c9ec8b8a758ad1caa95b95ddc8e	OTU_176	D_0__Eukaryota	D_1__Opisthokonta	D_2__Holozoa	D_3__Metazoa (Animalia)	D_4__Eumetazoa	D_5__Bilateria	D_6__Arthropoda	D_7__Crustacea	D_8__Ostracoda	D_9__Podocopa	D_10__Podocopida	D_11__Xestoleberis hanaii	D_12__	D_13__	D_14__	0.979268
f154607f18e0c2eecbc008e7fc450317	OTU_177	D_0__Eukaryota	D_1__Opisthokonta	D_2__Holozoa	D_3__Metazoa (Animalia)	D_4__Eumetazoa	D_5__Bilateria	D_6__Annelida	D_7__Polychaeta	D_8__Palpata	D_9__Phyllodocida	D_10__Sphaerosyllis hirsuta	D_11__	D_12__	D_13__	D_14__	0.918873
58dfb6b38c1233f224f61aa3075a6652	OTU_178	D_0__Eukaryota	D_1__Opisthokonta														0.952847
40f04b1c0eee8d09e056ecdc31d9e2fe	OTU_179	D_0__Eukaryota	D_1__SAR	D_2__Stramenopiles	D_3__Ochrophyta	D_4__Diatomea	D_5__Bacillariophytina	D_6__Bacillariophyceae									0.985943
0cf87b496de8585dc8dec8de8f1fc76e	OTU_180	D_0__Eukaryota	D_1__SAR	D_2__Alveolata	D_3__Dinoflagellata												0.700205
0970fbc5e12183ed74e46732244711a2	OTU_181	D_0__Eukaryota	D1_Unindentified_Eukaryota														1
4f98963b63fdf02be5ee37e5e20b0630	OTU_182	D_0__Eukaryota	D_1__Opisthokonta	D_2__Holozoa	D_3__Metazoa (Animalia)	D_4__Porifera	D_5__Demospongiae	D_6__Suberitida	D_7__Terpios aploos	D_8__	D_9__	D_10__	D_11__	D_12__	D_13__	D_14__	0.996378
f4315a7a15b0530cc7223f6882a3510d	OTU_183	D_0__Eukaryota	D_1__Cryptophyceae	D_2__Cryptomonadales	D_3__Geminigera	D_4__Geminigera cryophila	D_5__	D_6__	D_7__	D_8__	D_9__	D_10__	D_11__	D_12__	D_13__	D_14__	0.928122
cccb4667f9bd6ba7ac19cc8ecf823e69	OTU_184	D_0__Eukaryota	D_1__Opisthokonta	D_2__Holozoa	D_3__Metazoa (Animalia)	D_4__Eumetazoa	D_5__Bilateria	D_6__Chordata	D_7__Vertebrata	D_8__Gnathostomata	D_9__Euteleostomi	D_10__Actinopterygii	D_11__Neopterygii	D_12__Teleostei			0.982431
9b4227ba37427faa685aa324577ac6f8	OTU_185	D_0__Eukaryota	D_1__Opisthokonta	D_2__Nucletmycea	D_3__Fungi	D_4__Dikarya	D_5__Basidiomycota	D_6__Agaricomycotina	D_7__Agaricomycetes	D_8__Agaricales							0.948825
1e8d8aacdb853eeb9597ea7671da97d9	OTU_186	D_0__Eukaryota	D_1__Haptophyta	D_2__Prymnesiophyceae	D_3__Prymnesiales	D_4__OLI16029	D_5__uncultured marine eukaryote	D_6__	D_7__	D_8__	D_9__	D_10__	D_11__	D_12__	D_13__	D_14__	0.995874
8d6ea2130b635720b7b5acabcb363c63	OTU_187	D_0__Eukaryota	D_1__SAR	D_2__Stramenopiles	D_3__MAST-4	D_4__uncultured stramenopile	D_5__	D_6__	D_7__	D_8__	D_9__	D_10__	D_11__	D_12__	D_13__	D_14__	0.981749
bf6f45c7b294d3e81d3ff236aff3de19	OTU_188	D_0__Eukaryota	D1_Unindentified_Eukaryota														1
4ff83ffd50a9529c376fa50f93cc9d4f	OTU_189	D_0__Eukaryota	D_1__Opisthokonta	D_2__Holozoa	D_3__Metazoa (Animalia)	D_4__Eumetazoa	D_5__Cnidaria	D_6__Anthozoa	D_7__Hexacorallia	D_8__Scleractinia							0.999946
612212c787f27ed2467d0f772964c1f5	OTU_190	D_0__Eukaryota	D_1__SAR	D_2__Alveolata													0.999998
de720d3102e2c6a7f07b90a6f12ad6f4	OTU_191	D_0__Eukaryota	D_1__Cryptophyceae	D_2__Kathablepharidae	D_3__Leucocryptos	D_4__uncultured eukaryote	D_5__	D_6__	D_7__	D_8__	D_9__	D_10__	D_11__	D_12__	D_13__	D_14__	0.999969
63089b182f46dbd3eb26cae8d0f7fad0	OTU_192	D_0__Eukaryota	D_1__SAR	D_2__Alveolata	D_3__Dinoflagellata	D_4__Dinophyceae	D_5__Gymnodiniphycidae	D_6__Gymnodinium clade	D_7__Chytriodinium	D_8__uncultured eukaryote	D_9__	D_10__	D_11__	D_12__	D_13__	D_14__	0.991404
e1b1cc8501036b6977cc54919aca6561	OTU_193	D_0__Eukaryota	D_1__SAR	D_2__Stramenopiles	D_3__Ochrophyta	D_4__Eustigmatophyceae	D_5__Eustigmatales	D_6__uncultured	D_7__uncultured eukaryote	D_8__	D_9__	D_10__	D_11__	D_12__	D_13__	D_14__	0.999992
0587559f190404186b55b5ac53aedf9f	OTU_194	D_0__Eukaryota	D1_Unindentified_Eukaryota														1
16270d3267c8b27bddb83c000dc9a024	OTU_195	D_0__Eukaryota	D_1__SAR	D_2__Alveolata	D_3__Protalveolata	D_4__Syndiniales	D_5__uncultured Duboscquella	D_6__	D_7__	D_8__	D_9__	D_10__	D_11__	D_12__	D_13__	D_14__	0.996517
8df8c70153c8a93042f77f6f4f8463fa	OTU_196	D_0__Eukaryota	D_1__Opisthokonta	D_2__Holozoa	D_3__Metazoa (Animalia)	D_4__Eumetazoa	D_5__Bilateria	D_6__Arthropoda	D_7__Crustacea	D_8__Maxillopoda	D_9__Copepoda	D_10__Siphonostomatoida					0.79926
90d91b6e56869a6278bb8a7eb158ca99	OTU_197	D_0__Eukaryota	D_1__Haptophyta	D_2__Prymnesiophyceae	D_3__uncultured	D_4__uncultured marine eukaryote	D_5__	D_6__	D_7__	D_8__	D_9__	D_10__	D_11__	D_12__	D_13__	D_14__	0.918283
ecfd4b0e29c720a8c8186f5109eb1cb3	OTU_198	D_0__Eukaryota	D1_Unindentified_Eukaryota														1
5f9b54ea105d158b6384c3769867a895	OTU_199	D_0__Eukaryota	D_1__SAR	D_2__Stramenopiles	D_3__Ochrophyta	D_4__Diatomea	D_5__Bacillariophytina	D_6__Mediophyceae									0.999998
cce20ccfc82132be4e1bb1caea9bf081	OTU_200	D_0__Eukaryota	D_1__SAR	D_2__Alveolata	D_3__Dinoflagellata	D_4__Dinophyceae	D_5__Gymnodiniphycidae	D_6__Kareniaceae	D_7__Karlodinium	D_8__Karlodinium veneficum	D_9__	D_10__	D_11__	D_12__	D_13__	D_14__	0.962884
fc88b051e63b53998605701c74f07563	OTU_201	D_0__Eukaryota	D_1__Archaeplastida	D_2__Chloroplastida	D_3__Chlorophyta	D_4__Mamiellophyceae	D_5__Mamiellales	D_6__Micromonas	D_7__uncultured Chlorophyta	D_8__	D_9__	D_10__	D_11__	D_12__	D_13__	D_14__	0.932417
345a52127059ae2b9bfab094ab31a2d1	OTU_202	D_0__Eukaryota	D_1__Opisthokonta														0.709225
a9ee1596738966d4631c445a43a078d2	OTU_203	D_0__Eukaryota	D_1__Opisthokonta	D_2__Holozoa	D_3__Metazoa (Animalia)	D_4__Eumetazoa	D_5__Bilateria	D_6__Annelida	D_7__Polychaeta	D_8__Palpata							0.928036
4ed99c1b16ad9790231bdc77c28430d0	OTU_204	D_0__Eukaryota	D_1__Opisthokonta	D_2__Holozoa	D_3__Metazoa (Animalia)	D_4__Eumetazoa	D_5__Bilateria										0.978636
60f2b95a297b0f580fe669ceef82ff91	OTU_205	D_0__Eukaryota	D_1__SAR	D_2__Alveolata	D_3__Dinoflagellata	D_4__Dinophyceae	D_5__Peridiniphycidae										0.705909
dc8599c628d6ac13f1cb8388ddb18308	OTU_206	D_0__Eukaryota	D_1__SAR	D_2__Stramenopiles													0.977475
b4cbfe1715043fbeb3448d6312d3b5fe	OTU_207	D_0__Eukaryota	D1_Unindentified_Eukaryota														1
ed8bc7ac49898fccb4b8f5a56737ac6d	OTU_208	D_0__Eukaryota	D_1__Opisthokonta	D_2__Holozoa	D_3__Metazoa (Animalia)	D_4__Eumetazoa	D_5__Bilateria	D_6__Arthropoda	D_7__Crustacea	D_8__Maxillopoda	D_9__Copepoda						0.824713
5214ed4cdcbac75ab9c778cd37ef5f23	OTU_209	D_0__Eukaryota	D_1__SAR	D_2__Alveolata	D_3__Dinoflagellata	D_4__Dinophyceae	D_5__Gymnodiniphycidae	D_6__Kareniaceae									0.706622
f04499dcf2827b906b5ab8b8740df34b	OTU_210	D_0__Eukaryota	D1_Unindentified_Eukaryota														1
23d20d86a58ff25cf324316e3d61e9ba	OTU_211	D_0__Eukaryota	D_1__Excavata	D_2__Discoba	D_3__Discicristata	D_4__Euglenozoa	D_5__Kinetoplastea	D_6__Metakinetoplastina	D_7__Neobodonida	D_8__Neobodo	D_9__uncultured kinetoplastid	D_10__	D_11__	D_12__	D_13__	D_14__	0.787321
ccc028af683da1de5cf0a747631a546f	OTU_212	D_0__Eukaryota	D_1__SAR	D_2__Alveolata	D_3__Apicomplexa	D_4__Conoidasida	D_5__Gregarinasina	D_6__Archigregarinorida	D_7__Selenidium								0.982326
f45c453fbe18d144d37f677d09080051	OTU_213	D_0__Eukaryota	D_1__Opisthokonta	D_2__Holozoa	D_3__Metazoa (Animalia)	D_4__Eumetazoa	D_5__Bilateria	D_6__Annelida	D_7__Polychaeta	D_8__Scolecida	D_9__Spionida						0.998872
edc662fdd86c10808685847a70e609a6	OTU_214	D_0__Eukaryota	D1_Unindentified_Eukaryota														1
af91269e21ce8353156342284a4f3ae8	OTU_215	D_0__Eukaryota	D_1__Opisthokonta	D_2__Holozoa	D_3__Metazoa (Animalia)	D_4__Eumetazoa	D_5__Bilateria	D_6__Gastrotricha	D_7__Chaetonotida								0.825059
8dd28efa6070a22dbbf83726c33b30df	OTU_216	D_0__Eukaryota	D1_Unindentified_Eukaryota														1
5b6220787e5f1b9e24716447d13d1276	OTU_217	D_0__Eukaryota	D_1__Opisthokonta	D_2__Holozoa	D_3__Metazoa (Animalia)	D_4__Eumetazoa	D_5__Bilateria	D_6__Hemichordata	D_7__Enteropneusta	D_8__Harrimaniidae							0.999999
346507f63ae81bd6ec37c38fd9cdb633	OTU_218	D_0__Eukaryota	D_1__SAR	D_2__Stramenopiles													0.998115
3cf1ac2ac9d455726bd74c9234deab84	OTU_219	D_0__Eukaryota	D_1__SAR	D_2__Stramenopiles	D_3__Ochrophyta	D_4__Diatomea	D_5__Bacillariophytina										0.786234
deb817855ccf2aecee02af9fbbbc65e0	OTU_220	D_0__Eukaryota	D_1__Opisthokonta	D_2__Holozoa	D_3__Metazoa (Animalia)	D_4__Eumetazoa	D_5__Bilateria	D_6__Arthropoda	D_7__Crustacea	D_8__Maxillopoda	D_9__Copepoda	D_10__Calanoida	D_11__Centropages furcatus	D_12__	D_13__	D_14__	1
85cc4a13e2dc9f71b7f2178fe0450605	OTU_221	D_0__Eukaryota	D_1__SAR	D_2__Alveolata	D_3__Ciliophora	D_4__Intramacronucleata	D_5__Spirotrichea	D_6__Choreotrichia	D_7__Steenstrupiella								1
9c32d493fb534376cfe621fd95e2373a	OTU_222	D_0__Eukaryota	D_1__Opisthokonta	D_2__Nucletmycea	D_3__Fungi	D_4__Dikarya	D_5__Basidiomycota	D_6__Ustilaginomycotina	D_7__Malasseziomycetes	D_8__Malasseziales	D_9__Malasseziaceae	D_10__Malassezia	D_11__Malassezia pachydermatis	D_12__	D_13__	D_14__	0.842556
77e6a004a3327f28ee82c03b63a2f661	OTU_223	D_0__Eukaryota	D_1__Opisthokonta	D_2__Nucletmycea	D_3__Fungi	D_4__Dikarya	D_5__Basidiomycota	D_6__Agaricomycotina	D_7__Agaricomycetes								0.728888
a94bcc231c31e5d8a5940ce32ff552e7	OTU_224	D_0__Eukaryota	D_1__SAR	D_2__Stramenopiles	D_3__Ochrophyta	D_4__Diatomea	D_5__Bacillariophytina	D_6__Bacillariophyceae									0.847411
90a75b782c5be3f9b739d8c69590eda4	OTU_225	D_0__Eukaryota	D1_Unindentified_Eukaryota														1
63b4f87fe3c23228eee8f784804feaca	OTU_226	D_0__Eukaryota	D1_Unindentified_Eukaryota														1
e24e39b22c8aa9227f9cb0b7d1af21b9	OTU_227	D_0__Eukaryota	D_1__SAR	D_2__Stramenopiles	D_3__Ochrophyta	D_4__Diatomea	D_5__Coscinodiscophytina	D_6__Actinocyclus	D_7__uncultured eukaryote	D_8__	D_9__	D_10__	D_11__	D_12__	D_13__	D_14__	0.945961
a20a59c8946e31e62772c8a0a1475b8d	OTU_228	D_0__Eukaryota	D_1__SAR	D_2__Stramenopiles	D_3__Ochrophyta	D_4__Diatomea	D_5__Bacillariophytina	D_6__Bacillariophyceae									0.701221
020645d3b0aa28447db962d09243df88	OTU_229	D_0__Eukaryota	D_1__Opisthokonta	D_2__Holozoa	D_3__Metazoa (Animalia)	D_4__Eumetazoa	D_5__Bilateria	D_6__Arthropoda	D_7__Crustacea	D_8__Malacostraca	D_9__Eumalacostraca	D_10__Peracarida					0.99756
52f24303535ac5c9c100b01552d018ac	OTU_230	D_0__Eukaryota	D1_Unindentified_Eukaryota														1
08282972630627e934a91345ca83d411	OTU_231	D_0__Eukaryota	D_1__Opisthokonta	D_2__Nucletmycea	D_3__Fungi	D_4__Dikarya	D_5__Ascomycota	D_6__Pezizomycotina	D_7__Dothideomycetes	D_8__Capnodiales	D_9__Teratosphaeriaceae	D_10__Hortaea					0.998842
cb28a22af559e458cd6b5feedff1b260	OTU_232	D_0__Eukaryota	D_1__SAR	D_2__Stramenopiles	D_3__Ochrophyta	D_4__Diatomea	D_5__Bacillariophytina										0.86023
2f6dcce5402f69f104b3d8f08e99dc11	OTU_233	D_0__Eukaryota	D_1__SAR	D_2__Stramenopiles	D_3__uncultured	D_4__uncultured stramenopile	D_5__	D_6__	D_7__	D_8__	D_9__	D_10__	D_11__	D_12__	D_13__	D_14__	1
7f17aa43ef38fcf5c96c93a7d2f69bcf	OTU_234	D_0__Eukaryota	D_1__SAR	D_2__Alveolata	D_3__Ciliophora	D_4__Intramacronucleata	D_5__Spirotrichea	D_6__Oligotrichia	D_7__Pseudotontonia	D_8__uncultured eukaryote	D_9__	D_10__	D_11__	D_12__	D_13__	D_14__	0.792545
aed5aa028a351e99690aafd367bae87f	OTU_235	D_0__Eukaryota	D_1__Opisthokonta	D_2__Holozoa	D_3__Metazoa (Animalia)												0.795746
ae2d0ece34e199855c057f5293157519	OTU_236	D_0__Eukaryota	D_1__Opisthokonta	D_2__Holozoa	D_3__Metazoa (Animalia)	D_4__Porifera	D_5__Demospongiae	D_6__Suberitida	D_7__Terpios aploos	D_8__	D_9__	D_10__	D_11__	D_12__	D_13__	D_14__	1
0af202fda12799fcf5782503997b1295	OTU_237	D_0__Eukaryota	D_1__Opisthokonta	D_2__Holozoa	D_3__Metazoa (Animalia)	D_4__Eumetazoa	D_5__Bilateria	D_6__Arthropoda									0.970838
a1c6f869ca67f215e543826fc6f8ace3	OTU_238	D_0__Eukaryota	D1_Unindentified_Eukaryota														1
84b318b5b170e7e7ab176e85f23c7ef8	OTU_239	D_0__Eukaryota	D_1__SAR	D_2__Alveolata	D_3__Protalveolata	D_4__Syndiniales	D_5__Syndiniales Group I	D_6__uncultured Duboscquella	D_7__	D_8__	D_9__	D_10__	D_11__	D_12__	D_13__	D_14__	1
ee2bf1c995c18544f9e1802dbd635245	OTU_240	D_0__Eukaryota	D_1__Opisthokonta	D_2__Holozoa	D_3__Metazoa (Animalia)	D_4__Eumetazoa	D_5__Bilateria	D_6__Arthropoda	D_7__Crustacea	D_8__Maxillopoda	D_9__Copepoda	D_10__Calanoida					0.732404
331ad55e0af513d147a2686e07606718	OTU_241	D_0__Eukaryota	D1_Unindentified_Eukaryota														1
fd91c32e6ed729722459e73c4898e682	OTU_242	D_0__Eukaryota	D_1__SAR	D_2__Rhizaria	D_3__Cercozoa	D_4__Chlorarachniophyta	D_5__uncultured	D_6__uncultured marine eukaryote	D_7__	D_8__	D_9__	D_10__	D_11__	D_12__	D_13__	D_14__	1
7da105fe2a374611c0f2739817afc7f7	OTU_243	D_0__Eukaryota	D_1__SAR	D_2__Stramenopiles	D_3__Ochrophyta	D_4__Chrysophyceae											0.752973
d09daa5ff7958fa05a6a1ffc0fa92a41	OTU_244	D_0__Eukaryota	D_1__SAR	D_2__Rhizaria	D_3__Cercozoa	D_4__Thecofilosea	D_5__Cryomonadida	D_6__Protaspidae	D_7__Protaspis	D_8__uncultured eukaryote	D_9__	D_10__	D_11__	D_12__	D_13__	D_14__	0.999692
340e7e986a205a64d2acaf45eab1d1a4	OTU_245	D_0__Eukaryota	D_1__SAR	D_2__Alveolata	D_3__Dinoflagellata	D_4__Dinophyceae											0.970842
e2afc87aa04e052989fd54210e3f8514	OTU_246	D_0__Eukaryota	D_1__SAR	D_2__Stramenopiles	D_3__Ochrophyta	D_4__Diatomea	D_5__Bacillariophytina	D_6__Bacillariophyceae									0.974994
2e85cf339192597c9f3278c6d9252632	OTU_247	D_0__Eukaryota	D_1__Opisthokonta	D_2__Holozoa	D_3__Metazoa (Animalia)	D_4__Eumetazoa	D_5__Bilateria	D_6__Arthropoda	D_7__Crustacea	D_8__Maxillopoda	D_9__Copepoda	D_10__Harpacticoida					0.844862
e34e5dcd60692e178fb799db5492ff15	OTU_248	D_0__Eukaryota	D1_Unindentified_Eukaryota														1
4ec99a5ceb6882c67b0d68ebff05c8a6	OTU_249	D_0__Eukaryota	D_1__Opisthokonta	D_2__Holozoa	D_3__Metazoa (Animalia)	D_4__Eumetazoa	D_5__Bilateria	D_6__Annelida	D_7__Polychaeta	D_8__Palpata	D_9__Phyllodocida	D_10__Kefersteinia cirrata	D_11__	D_12__	D_13__	D_14__	0.97314
1d37747c078b233da95d831146e00f1c	OTU_250	D_0__Eukaryota	D1_Unindentified_Eukaryota														1
32fa062f5a78ed0e5ae39abd1c36d6e9	OTU_251	D_0__Eukaryota	D_1__SAR	D_2__Alveolata	D_3__Ciliophora	D_4__Intramacronucleata	D_5__Conthreep	D_6__Oligohymenophorea	D_7__Hymenostomatia	D_8__Tetrahymena	D_9__Tetrahymena corlissi	D_10__	D_11__	D_12__	D_13__	D_14__	0.976485
89d76989aedd18c307c70ab4e947f5be	OTU_252	D_0__Eukaryota	D1_Unindentified_Eukaryota														1
3feffed3198d72ecb117c2f37448ee20	OTU_253	D_0__Eukaryota	D_1__Opisthokonta	D_2__Holozoa	D_3__Metazoa (Animalia)	D_4__Eumetazoa	D_5__Bilateria	D_6__Gastrotricha	D_7__Chaetonotida	D_8__uncultured eukaryote	D_9__	D_10__	D_11__	D_12__	D_13__	D_14__	0.993797
2c97e88ede91f7e37520c64b1bbd3be0	OTU_254	D_0__Eukaryota	D_1__Opisthokonta	D_2__Holozoa	D_3__Metazoa (Animalia)	D_4__Eumetazoa	D_5__Bilateria	D_6__Arthropoda	D_7__Crustacea	D_8__Maxillopoda	D_9__Copepoda						0.999886
9c2f3c8c59179546306b27af8275c7b3	OTU_255	D_0__Eukaryota	D_1__SAR	D_2__Alveolata	D_3__Protalveolata	D_4__Syndiniales	D_5__Syndiniales Group I	D_6__uncultured Duboscquella	D_7__	D_8__	D_9__	D_10__	D_11__	D_12__	D_13__	D_14__	0.819069
a6d561fdb71209c5b46bb179926fa167	OTU_256	D_0__Eukaryota	D_1__SAR	D_2__Stramenopiles													0.997516
20a59c75bf3a5a7b690b06b1a1e02408	OTU_257	D_0__Eukaryota	D1_Unindentified_Eukaryota														1
9e0facaf92a5c8634d905f6c9c79800e	OTU_258	D_0__Eukaryota	D_1__SAR	D_2__Rhizaria	D_3__Retaria	D_4__Foraminifera	D_5__Globothalamea	D_6__Rotaliida									0.999999
8a6f5f8f1b852077c543352c91368705	OTU_259	D_0__Eukaryota	D_1__SAR	D_2__Rhizaria	D_3__Retaria	D_4__RAD A	D_5__uncultured marine Polycystinea	D_6__	D_7__	D_8__	D_9__	D_10__	D_11__	D_12__	D_13__	D_14__	0.765748
bda7dfb55afe2d8ea2b14200d689aa25	OTU_260	D_0__Eukaryota	D_1__Opisthokonta	D_2__Nucletmycea	D_3__Fungi	D_4__Dikarya	D_5__Ascomycota	D_6__Pezizomycotina	D_7__Eurotiomycetes	D_8__Eurotiales	D_9__Aspergillaceae	D_10__Aspergillus					0.996518
8c3af4cc2f6066a73f621ee881eb6ebb	OTU_261	D_0__Eukaryota	D_1__Opisthokonta	D_2__Holozoa	D_3__Metazoa (Animalia)	D_4__Eumetazoa	D_5__Bilateria	D_6__Arthropoda	D_7__Crustacea	D_8__Maxillopoda	D_9__Copepoda	D_10__Poecilostomatoida	D_11__uncultured eukaryote	D_12__	D_13__	D_14__	0.999811
508518958a31f08f4dea8b994ef6bdea	OTU_262	D_0__Eukaryota	D1_Unindentified_Eukaryota														1
1b1cd52bcda82509084e38b91768c744	OTU_263	D_0__Eukaryota	D_1__SAR	D_2__Alveolata	D_3__Dinoflagellata	D_4__Dinophyceae											0.938463
22d411c70f93b4ca38368709c56078b2	OTU_264	D_0__Eukaryota	D1_Unindentified_Eukaryota														1
472373cde020a38f9186e3258c61f16f	OTU_265	D_0__Eukaryota	D_1__Opisthokonta	D_2__Holozoa	D_3__Metazoa (Animalia)	D_4__Eumetazoa	D_5__Bilateria	D_6__Arthropoda	D_7__Crustacea	D_8__Maxillopoda	D_9__Copepoda	D_10__Cyclopoida					0.96012
3074f0e872e3eb594204d541d53ab188	OTU_266	D_0__Eukaryota	D1_Unindentified_Eukaryota														1
296ec0118ac28c09c8747f6a4fdf7f8b	OTU_267	D_0__Eukaryota	D_1__Opisthokonta	D_2__Holozoa	D_3__Metazoa (Animalia)	D_4__Eumetazoa	D_5__Cnidaria	D_6__Anthozoa	D_7__Octocorallia								0.99999
aab68a513538ab22bdf45056e846a417	OTU_268	D_0__Eukaryota	D_1__Opisthokonta														0.955154
1d36cc675a1f136f43d6740159477b07	OTU_269	D_0__Eukaryota	D1_Unindentified_Eukaryota														1
08191b2608ccde169331af45966cc772	OTU_270	D_0__Eukaryota	D_1__Opisthokonta	D_2__Holozoa	D_3__Metazoa (Animalia)	D_4__Eumetazoa	D_5__Cnidaria	D_6__Anthozoa	D_7__Octocorallia								0.999993
54ac996bad6f317c4a158be1ca9b5e4e	OTU_271	D_0__Eukaryota	D_1__SAR	D_2__Alveolata	D_3__Protalveolata	D_4__Syndiniales											0.806583
9eedf4f6947d1a69459ee5c2a4d07861	OTU_272	D_0__Eukaryota	D1_Unindentified_Eukaryota														1
edeff794d8291b4b1b8b984e122a46e4	OTU_273	D_0__Eukaryota	D_1__Opisthokonta	D_2__Holozoa	D_3__Metazoa (Animalia)	D_4__Eumetazoa	D_5__Bilateria	D_6__Arthropoda	D_7__Crustacea	D_8__Maxillopoda	D_9__Copepoda	D_10__Cyclopoida	D_11__Oithona sp. 2 New Caledonia-RJH-2004	D_12__	D_13__	D_14__	0.808945
dd3f88d8430c161ba28f5eb4111846b4	OTU_274	D_0__Eukaryota	D_1__SAR	D_2__Stramenopiles	D_3__MAST-3	D_4__MAST-3A	D_5__Rhizidiomyces apophysatus	D_6__	D_7__	D_8__	D_9__	D_10__	D_11__	D_12__	D_13__	D_14__	0.999998
c6eb1c4df9d15e42a863eda67a8c25e7	OTU_275	D_0__Eukaryota	D_1__SAR	D_2__Alveolata	D_3__Protalveolata	D_4__Syndiniales	D_5__Syndiniales Group II	D_6__uncultured alveolate	D_7__	D_8__	D_9__	D_10__	D_11__	D_12__	D_13__	D_14__	0.947096
82ba150d33e863b756faf113366cd07b	OTU_276	D_0__Eukaryota	D_1__Opisthokonta	D_2__Holozoa	D_3__Metazoa (Animalia)	D_4__Eumetazoa	D_5__Bilateria	D_6__Rotifera	D_7__Monogononta	D_8__Ploimida							0.734714
d74543915e71f8d0229ed2b9b27bfa8f	OTU_277	D_0__Eukaryota	D_1__Opisthokonta	D_2__Holozoa	D_3__Metazoa (Animalia)	D_4__Eumetazoa	D_5__Bilateria	D_6__Arthropoda	D_7__Crustacea	D_8__Maxillopoda	D_9__Copepoda	D_10__Harpacticoida					0.726071
1a90de8e5fb1c144c508fcc074887217	OTU_278	D_0__Eukaryota	D_1__Opisthokonta	D_2__Holozoa	D_3__Metazoa (Animalia)	D_4__Eumetazoa	D_5__Cnidaria	D_6__Anthozoa	D_7__Octocorallia								1
99bd12d14a54007acfb616ea9e301bc7	OTU_279	D_0__Eukaryota	D_1__Opisthokonta	D_2__Holozoa	D_3__Metazoa (Animalia)	D_4__Porifera	D_5__Demospongiae	D_6__Verongiida	D_7__Smenospongia aurea	D_8__	D_9__	D_10__	D_11__	D_12__	D_13__	D_14__	0.92261
41bb6f5b8891a620a0d84de9b853d1b1	OTU_280	D_0__Eukaryota	D_1__SAR	D_2__Stramenopiles	D_3__Ochrophyta	D_4__Diatomea											0.994486
679a8bdae4abe5b0adbfc5993388fa62	OTU_281	D_0__Eukaryota	D_1__SAR	D_2__Alveolata	D_3__Dinoflagellata	D_4__Dinophyceae	D_5__Gymnodiniphycidae	D_6__Gymnodinium clade	D_7__Erythropsidinium	D_8__uncultured eukaryote	D_9__	D_10__	D_11__	D_12__	D_13__	D_14__	0.911324
656b23d03693f124cd59ef45cd1858c3	OTU_282	D_0__Eukaryota	D_1__Archaeplastida	D_2__Chloroplastida	D_3__Chlorophyta	D_4__Chlorodendrophyceae	D_5__Chlorodendrales	D_6__Tetraselmis	D_7__Tetraselmis chuii	D_8__	D_9__	D_10__	D_11__	D_12__	D_13__	D_14__	0.948193
22fc4c88f032311d1602b9d9f57a7605	OTU_283	D_0__Eukaryota	D_1__Opisthokonta	D_2__Holozoa	D_3__Metazoa (Animalia)	D_4__Eumetazoa	D_5__Bilateria	D_6__Arthropoda	D_7__Crustacea	D_8__Maxillopoda	D_9__Copepoda	D_10__Harpacticoida	D_11__Paramphiascella fulvofasciata	D_12__	D_13__	D_14__	0.998076
8806b796e6d220a4dea7d66560d8fce1	OTU_284	D_0__Eukaryota	D1_Unindentified_Eukaryota														1
9c2ddcc69856ca59ea698a51203f7af0	OTU_285	D_0__Eukaryota	D_1__SAR	D_2__Stramenopiles	D_3__Ochrophyta												0.945321
a583ab06edd4f176752d7f8fa27f9e0f	OTU_286	D_0__Eukaryota	D_1__SAR	D_2__Alveolata	D_3__Dinoflagellata	D_4__Dinophyceae	D_5__Gymnodiniphycidae	D_6__Suessiaceae	D_7__Symbiodinium								0.99941
a9e48d26e40ed89e79f713045ed80d28	OTU_287	D_0__Eukaryota	D_1__SAR	D_2__Rhizaria	D_3__Retaria	D_4__Polycystinea	D_5__Collodaria	D_6__Collosphaera	D_7__marine metagenome	D_8__	D_9__	D_10__	D_11__	D_12__	D_13__	D_14__	0.931394
f05ebb3cf4fc8dfa3d99be32a528af2f	OTU_288	D_0__Eukaryota	D_1__Opisthokonta	D_2__Nucletmycea	D_3__Fungi	D_4__Dikarya	D_5__Basidiomycota	D_6__Ustilaginomycotina	D_7__Malasseziomycetes	D_8__Malasseziales	D_9__Malasseziaceae	D_10__Malassezia	D_11__Malassezia japonica	D_12__	D_13__	D_14__	0.734245
f31c56e2ce0245b6cdc4ed178a0c7228	OTU_289	D_0__Eukaryota	D_1__Opisthokonta	D_2__Holozoa	D_3__Metazoa (Animalia)	D_4__Eumetazoa	D_5__Bilateria	D_6__Annelida	D_7__Polychaeta	D_8__Scolecida	D_9__Spionida	D_10__Prionospio cirrifera	D_11__	D_12__	D_13__	D_14__	0.957899
84f82338481d01fc50b4a7a5c62e1eef	OTU_290	D_0__Eukaryota	D_1__Opisthokonta	D_2__Holozoa	D_3__Metazoa (Animalia)	D_4__Eumetazoa	D_5__Bilateria	D_6__Annelida	D_7__Polychaeta	D_8__Palpata	D_9__Phyllodocida						0.997247
d16ee7f7f968b6f335733e636f3aed8b	OTU_291	D_0__Eukaryota	D1_Unindentified_Eukaryota														1
0f1aaa2a91281974fcef6e29eafcd130	OTU_292	D_0__Eukaryota	D1_Unindentified_Eukaryota														1
8934ba7222a3355123370e17066ac7e7	OTU_293	D_0__Eukaryota	D_1__Opisthokonta	D_2__Holozoa	D_3__Metazoa (Animalia)	D_4__Eumetazoa	D_5__Bilateria	D_6__Annelida	D_7__Clitellata	D_8__Hirudinida	D_9__Rhynchobdellida						0.704631
9ead14e7abd32c2e56eda68266808e63	OTU_294	D_0__Eukaryota	D_1__Opisthokonta	D_2__Nucletmycea	D_3__Fungi	D_4__Dikarya	D_5__Basidiomycota	D_6__Ustilaginomycotina	D_7__Malasseziomycetes	D_8__Malasseziales	D_9__Malasseziaceae	D_10__Malassezia					0.775751
6d43a6741d90e18f0bb9d302de2bdf8f	OTU_295	D_0__Eukaryota	D_1__SAR	D_2__Alveolata	D_3__Protalveolata	D_4__Syndiniales	D_5__Syndiniales Group II	D_6__uncultured eukaryote	D_7__	D_8__	D_9__	D_10__	D_11__	D_12__	D_13__	D_14__	0.84255
1b6892fb9021ece7a76b464916aa233c	OTU_296	D_0__Eukaryota	D_1__SAR	D_2__Alveolata	D_3__Protalveolata	D_4__Syndiniales	D_5__Syndiniales Group II	D_6__uncultured Amoebophrya	D_7__	D_8__	D_9__	D_10__	D_11__	D_12__	D_13__	D_14__	0.934228
92e4008011db82d57ff0a904cdbc56fa	OTU_297	D_0__Eukaryota	D_1__Opisthokonta	D_2__Holozoa	D_3__Metazoa (Animalia)	D_4__Eumetazoa	D_5__Bilateria	D_6__Arthropoda	D_7__Crustacea	D_8__Maxillopoda	D_9__Copepoda	D_10__Cyclopoida	D_11__uncultured eukaryote	D_12__	D_13__	D_14__	0.998531
f219441c4f44885033e38204f98ceb14	OTU_298	D_0__Eukaryota	D_1__SAR	D_2__Alveolata	D_3__Apicomplexa	D_4__Conoidasida	D_5__Gregarinasina	D_6__Eugregarinorida	D_7__Gregarina	D_8__Heterocapsaceae environmental sample	D_9__	D_10__	D_11__	D_12__	D_13__	D_14__	0.99248
d6685963a72cca9313e79e4a8a3e8f5d	OTU_299	D_0__Eukaryota	D1_Unindentified_Eukaryota														1
a5d56b2ebff8160c0f0c0adeee65caa8	OTU_300	D_0__Eukaryota	D_1__Opisthokonta	D_2__Holozoa	D_3__Metazoa (Animalia)	D_4__Eumetazoa	D_5__Bilateria	D_6__Hemichordata	D_7__Enteropneusta	D_8__Harrimaniidae							0.999771
a814ee90997614e2b3ad13f83031ac01	OTU_301	D_0__Eukaryota	D_1__SAR	D_2__Alveolata	D_3__Protalveolata	D_4__Syndiniales	D_5__Syndiniales Group III	D_6__uncultured eukaryote	D_7__	D_8__	D_9__	D_10__	D_11__	D_12__	D_13__	D_14__	0.999718
81230beee1f89935dab00ffb478f97a1	OTU_302	D_0__Eukaryota	D_1__Opisthokonta														0.72143
a681f9622f47f82a1d4a468bb4376d14	OTU_303	D_0__Eukaryota	D_1__SAR	D_2__Alveolata	D_3__Ciliophora	D_4__Intramacronucleata	D_5__Spirotrichea	D_6__Oligotrichia									0.9795
c48b4e661dd5782d1bb67b4380ab582f	OTU_304	D_0__Eukaryota	D_1__SAR	D_2__Alveolata													0.99972
7ff6a16d0d223a99303386408ec44bed	OTU_305	D_0__Eukaryota	D_1__SAR	D_2__Stramenopiles	D_3__Ochrophyta	D_4__Diatomea	D_5__Bacillariophytina	D_6__Mediophyceae	D_7__Thalassiosira	D_8__uncultured stramenopile	D_9__	D_10__	D_11__	D_12__	D_13__	D_14__	0.945905
521ca7d358509c1ea6e024eb0bdb5332	OTU_306	D_0__Eukaryota	D_1__Opisthokonta	D_2__Holozoa	D_3__Metazoa (Animalia)	D_4__Eumetazoa	D_5__Bilateria	D_6__Arthropoda									0.745046
35f78ed705ebc4e9afff9502113f8277	OTU_307	D_0__Eukaryota	D_1__SAR	D_2__Stramenopiles	D_3__Ochrophyta												0.985378
7117a6a5bbec5b8ba8f893e8eeabc550	OTU_308	D_0__Eukaryota	D_1__Opisthokonta	D_2__Holozoa	D_3__Metazoa (Animalia)	D_4__Eumetazoa	D_5__Bilateria										0.918632
50b3fb31b9511b3a3eb15845ee8d2404	OTU_309	D_0__Eukaryota	D_1__SAR	D_2__Stramenopiles	D_3__Ochrophyta	D_4__Diatomea	D_5__Bacillariophytina	D_6__Mediophyceae	D_7__Thalassiosira								0.995188
e8575092bc0e5ccfe8ce6cdc4ac4b552	OTU_310	D_0__Eukaryota	D_1__SAR	D_2__Alveolata													0.999509
483a68690f34645fe8cb8362b619ca13	OTU_311	D_0__Eukaryota	D1_Unindentified_Eukaryota														1
444d7a63d98dd2c66768c52a5c983195	OTU_312	D_0__Eukaryota	D_1__Opisthokonta	D_2__Holozoa	D_3__Metazoa (Animalia)	D_4__Eumetazoa	D_5__Bilateria	D_6__Arthropoda	D_7__Crustacea	D_8__Maxillopoda	D_9__Copepoda	D_10__Harpacticoida					0.945329
d83ff4f32a1b5d2ec8456dea84600c59	OTU_313	D_0__Eukaryota	D_1__SAR	D_2__Stramenopiles	D_3__Ochrophyta	D_4__Diatomea	D_5__Coscinodiscophytina	D_6__Fragilariales									0.984185
47ede2dac0278ae4ff03824823c9fcea	OTU_314	D_0__Eukaryota	D_1__SAR	D_2__Alveolata	D_3__Dinoflagellata	D_4__Dinophyceae											0.806905
ff007eedbcfb5ceda0680f2666758f35	OTU_315	D_0__Eukaryota	D_1__Opisthokonta	D_2__Nucletmycea	D_3__Fungi	D_4__Dikarya	D_5__Basidiomycota	D_6__Agaricomycotina	D_7__Tremellomycetes	D_8__Tremellales	D_9__Bulleribasidiaceae	D_10__Dioszegia	D_11__Dioszegia fristingensis	D_12__	D_13__	D_14__	0.99094
497d465f8260650844d8dcece24f565b	OTU_316	D_0__Eukaryota	D_1__SAR	D_2__Stramenopiles	D_3__Ochrophyta	D_4__Diatomea											0.985118
ba056428dc894492ebed9d329fb719f7	OTU_317	D_0__Eukaryota	D_1__Opisthokonta	D_2__Holozoa	D_3__Metazoa (Animalia)	D_4__Eumetazoa	D_5__Bilateria	D_6__Arthropoda	D_7__Crustacea	D_8__Maxillopoda	D_9__Copepoda						0.991967
bdebf9f2f1b823d6f8b4f709241a412f	OTU_318	D_0__Eukaryota	D_1__Opisthokonta	D_2__Nucletmycea	D_3__Fungi	D_4__Dikarya	D_5__Ascomycota	D_6__Saccharomycotina	D_7__Saccharomycetes	D_8__Saccharomycetales	D_9__Debaryomycetaceae	D_10__Candida-Lodderomyces clade					0.978715
7a53d44e65ca7149b85c130b1e79d44f	OTU_319	D_0__Eukaryota	D_1__Opisthokonta														0.996708
eae013f55e53036d4d29eebb7bf0c21c	OTU_320	D_0__Eukaryota	D_1__Opisthokonta	D_2__Holozoa	D_3__Metazoa (Animalia)	D_4__Eumetazoa	D_5__Bilateria	D_6__Gastrotricha	D_7__Chaetonotida	D_8__uncultured eukaryote	D_9__	D_10__	D_11__	D_12__	D_13__	D_14__	0.995604
27534364e2477d3ba82ded78dcc1c7ff	OTU_321	D_0__Eukaryota	D_1__Opisthokonta	D_2__Holozoa	D_3__Metazoa (Animalia)	D_4__Eumetazoa	D_5__Bilateria	D_6__Arthropoda	D_7__Crustacea	D_8__Maxillopoda	D_9__Copepoda	D_10__Calanoida	D_11__Sinocalanus sinensis	D_12__	D_13__	D_14__	0.977781
57a99e71adc0292a57c98dfe8e0a76e8	OTU_322	D_0__Eukaryota	D_1__SAR	D_2__Alveolata	D_3__Dinoflagellata	D_4__Dinophyceae	D_5__Gymnodiniphycidae	D_6__Kareniaceae	D_7__Karlodinium	D_8__uncultured marine eukaryote	D_9__	D_10__	D_11__	D_12__	D_13__	D_14__	0.751288
5c20bec4c55a0c778a325d3631c9cd50	OTU_323	D_0__Eukaryota	D_1__Opisthokonta	D_2__Holozoa	D_3__Metazoa (Animalia)	D_4__Eumetazoa	D_5__Bilateria	D_6__Arthropoda									0.914348
5a0db39d3a17e8d29306d56c976822e7	OTU_324	D_0__Eukaryota	D_1__Archaeplastida	D_2__Chloroplastida	D_3__Chlorophyta	D_4__Mamiellophyceae											0.999999
bca50662d5b32e0f35e5f6c25ca62523	OTU_325	D_0__Eukaryota	D1_Unindentified_Eukaryota														1
b3f01d98bfe79ed4a47371ba1033b6e1	OTU_326	D_0__Eukaryota	D_1__Opisthokonta	D_2__Holozoa	D_3__Metazoa (Animalia)	D_4__Eumetazoa	D_5__Bilateria	D_6__Xenacoelomorpha	D_7__Acoelomorpha	D_8__Acoela	D_9__Atriofronta polyvacuola	D_10__	D_11__	D_12__	D_13__	D_14__	1
[truncated: 20,160 more rows]

## Sheet: Symbiodiniaceae_sequences
Putative Symbiodiniaceae sequence data
Sequence_id	OTU_id	OTU.sym_id	Sequence
[truncated: 22 more rows]
