# Supplementary material for: Diversity and distribution of Symbiodiniaceae detected on coral reefs of Lombok, Indonesia using environmental DNA metabarcoding
Source: PeerJ. 2022 Oct 24;10:e14006. doi: 10.7717/peerj.14006 (PMC9610659; doi:10.7717/peerj.14006)
Supplement: File S3 [file peerj-10-14006-s004.xlsx]

## Sheet: BLAST_Result
BLAST result over OTUs of 22 putative Symbiodiniaceae
OTU_id	OTU.sym_id	Classifier (SILVA 97% & 99%)	Confident Rate	Accession Number	BLAST	Max score	Total score	% Query cover	E value	% Indentity	Reference
	OTU.sym1	D_7_Symbiodinium	0.99941	KC816641.1	Cladocopium sp. clade C	237	237	1	8e-59	1	Slapeta and Linares, 2013
	OTU.sym1	D_7_Symbiodinium	0.99941	AF238258.1	Symbiodinium sp. type C	237	237	1	8e-59	1	Toller et al., 2001
	OTU.sym1	D_7_Symbiodinium	0.99941	AB016595.1	Symbiodinium sp.	237	237	1	8e-59	1	Carlos et al., 1999
	OTU.sym1	D_7_Symbiodinium	0.99941	AB016595	SymbiodiniumCladeC	237	237	1	8e-59	1	Decelle et al., 2018
	OTU.sym1	D_7_Symbiodinium	0.99941	HM067613.1	Symbiodinium sp. 2-131	235	235	0.99	3e-58	1	Yang et al., 2012
	OTU.sym1	D_7_Symbiodinium	0.99941	HM067613	SymbiodiniumCladeC	235	235	0.99	3e-58	1	Decelle et al., 2018
	OTU.sym1	D_7_Symbiodinium	0.99941	EF036539.1	Symbiodinium goreaui	233	233	1	3e-57	0.9924	Zhang et al., 2007
	OTU.sym1	D_7_Symbiodinium	0.99941	MH702354.1	Symbiodinium sp. clade F4	231	231	0.99	1e-56	0.9923	Decelle et al., 2018
	OTU.sym1	D_7_Symbiodinium	0.99941	MH702343.1	Symbiodinium sp. clade H	228	228	1	4e-56	0.9847	Decelle et al., 2018
	OTU.sym2	D_7_Symbiodinium	0.82338	MH702341.1	Durusdunium trenchii	237	237	1	7e-59	1	Decelle et al., 2018
	OTU.sym2	D_7_Symbiodinium	0.82338	AY165766.1	Symbiodinium sp. ex Phyllodesmium briareum	237	237	1	7e-59	1	Waegele et al., 2003
	OTU.sym2	D_7_Symbiodinium	0.82338	AF238261.1	Symbiodinium sp. clade E	237	237	1	7e-59	1	Toller et al., 2001
	OTU.sym3	D_7_Symbiodinium	0.890746	EF526860.1	uncultured marine eukaryote	233	233	1	3e-57	0.9924	Behnke et al., 2010
	OTU.sym3	D_7_Symbiodinium	0.890746	KP404862.1	uncultured eukaryote	210	210	1	1e-50	0.9542	Wu et al., 2015
	OTU.sym3	D_7_Symbiodinium	0.890746	KF129808.1	uncultured eukaryote	210	210	1	1e-50	0.9542	Wu et al., 2015
	OTU.sym4	D_7_Symbiodinium	0.782736	MH702350.1	Symbiodinium sp. clade F3	231	231	0.99	1e-56	0.9923	Decelle et al., 2018
	OTU.sym4	D_7_Symbiodinium	0.782736	MH702349.1	Symbiodinium sp. clade F3	224	224	0.96	2e-54	0.9921	Decelle et al., 2018
	OTU.sym4	D_7_Symbiodinium	0.782736	MH702353.1	Symbiodinium sp. clade F4	228	228	1	4e-56	0.9847	Decelle et al., 2018
	OTU.sym4	D_7_Symbiodinium	0.782736	MH702351.1	Symbiodinium sp. clade F4	228	228	1	4e-56	0.9847	Decelle et al., 2018
	OTU.sym4	D_7_Symbiodinium	0.782736	MH702348.1	Symbiodinium sp. clade F2	228	228	1	4e-56	0.9847	Decelle et al., 2018
	OTU.sym5	D_7_Symbiodinium	0.768965	MH702354.1	Symbiodinium sp. clade F4	222	222	0.99	6e-54	0.9769	Decelle et al., 2018
	OTU.sym5	D_7_Symbiodinium	0.768965	MH702343.1	Symbiodinium sp. clade H	219	219	1	2e-53	0.9695	Decelle et al., 2018
	OTU.sym5	D_7_Symbiodinium	0.768965	KC816641.1	Cladocopium sp. clade C	219	219	1	2e-53	0.9695	Slapeta and Linares, 2013
	OTU.sym6	D_7_Symbiodinium	0.993577	MH702341.1	Durusdunium trenchii	233	233	1	3e-57	0.9924	Decelle et al., 2018
	OTU.sym6	D_7_Symbiodinium	0.993577	AY165766.1	Symbiodinium sp. ex Phyllodesmium briareum	233	233	1	3e-57	0.9924	Waegele et al., 2003
	OTU.sym6	D_7_Symbiodinium	0.993577	AF238261.1	Symbiodinium sp. clade E	233	233	1	3e-57	0.9924	Toller et al., 2001
	OTU.sym6	D_7_Symbiodinium	0.993577	KR476823.1	Effrenium voratum	228	228	1	4e-56	0.9847	Anu Baburaj et al. (Unpublish)
	OTU.sym7	D_7_Symbiodinium	0.995165	KC816641.1	Cladocopium sp. clade C	233	233	1	3e-57	0.9924	Slapeta and Linares, 2013
	OTU.sym7	D_7_Symbiodinium	0.995165	HM067611.1	Symbiodinium sp. 4-91	231	231	0.99	1e-56	0.9923	Lee et al., 2012
	OTU.sym7	D_7_Symbiodinium	0.995165	MH702341.1	Durusdunium trenchii	228	228	1	4e-56	0.9847	Decelle et al., 2018
	OTU.sym8	D_7_Symbiodinium	0.999189	KC816640.1	Cladocopium sp. clade C	233	233	1	3e-57	0.9924	Slapeta and Linares, 2013
	OTU.sym8	D_7_Symbiodinium	0.999189	AF238258.1	Symbiodinium sp. type C	233	233	1	3e-57	0.9924	Toller et al., 2001
	OTU.sym8	D_7_Symbiodinium	0.999189	AB016595.1	Symbiodinium sp.	233	233	1	3e-57	0.9924	Carlos et al., 1999
	OTU.sym9	D_7_Symbiodinium	0.827709	LC485280.1	Dactylodinium arachnoides	150	150	1	3e-32	0.876	Lum et al., 2019
	OTU.sym10	D_7_Symbiodinium	0.925078	MH702354.1	Symbiodinium sp. clade F4	235	235	0.99	3e-58	1	Decelle et al., 2018
	OTU.sym10	D_7_Symbiodinium	0.925078	KC816641.1	Cladocopium sp. clade C	233	233	1	3e-57	0.9924	Slapeta and Linares, 2013
	OTU.sym11	D_7_Symbiodinium (Polarella)	0.998953	LN898222.1	Yihiella yeosuensis	237	237	0.96	8e-59	1	Jeong et al., 2017
	OTU.sym11	D_7_Symbiodinium (Polarella)	0.998953	LC068840.1	Leiocephalium pseudosanguineum	219	219	0.96	2e-53	0.9695	Takahashi et al., 2015
	OTU.sym12	D_7_Symbiodinium	0.991678	MH702343.1	Symbiodinium sp. clade H	224	224	1	2e-54	0.9771	Decelle et al., 2018
	OTU.sym12	D_7_Symbiodinium	0.991678	KC816641.1	Cladocopium sp. clade C	224	224	1	2e-54	0.9771	Slapeta and Linares, 2013
	OTU.sym12	D_7_Symbiodinium	0.991678	AB016595.1	Symbiodinium sp.	224	224	1	2e-54	0.9771	Carlos et al., 1999
	OTU.sym13	D_7_Symbiodinium (Polarella)	0.942759	LN898222.1	Yihiella yeosuensis	233	233	0.96	3e-57	0.9924	Jeong et al., 2017
	OTU.sym13	D_7_Symbiodinium (Polarella)	0.942759	LC068840.1	Leiocephalium pseudosanguineum	224	224	0.96	2e-54	0.9771	Takahashi et al., 2015
	OTU.sym14	D_7_Symbiodinium	0.89099	KJ761400.1	uncultured eukaryote	214	214	0.96	9e-52	0.9618	Lie et al., 2014
	OTU.sym15	D_7_Symbiodinium	0.999046	KC816642.1	Cladocopium sp. clade C	233	233	0.96	3e-57	0.9924	Slapeta and Linares, 2013
	OTU.sym15	D_7_Symbiodinium	0.999046	AF238258.1	Symbiodinium sp. type C	233	233	0.96	3e-57	0.9924	Toller et al., 2001
	OTU.sym15	D_7_Symbiodinium	0.999046	AB016595.1	Symbiodinium sp.	233	233	0.96	3e-57	0.9924	Carlos et al., 1999
	OTU.sym15	D_7_Symbiodinium	0.999046	EF036539.1	Symbiodinium goreaui	228	228	0.96	4e-56	0.9847	Zhang et al., 2007
	OTU.sym16	D_7_Symbiodinium	0.999527	HM067613.1	Symbiodinium sp. 2-131	233	233	0.96	3e-57	0.9924	Yang et al., 2012
	OTU.sym16	D_7_Symbiodinium	0.999527	HM067612.1	Symbiodinium sp. 2-125	233	233	0.96	3e-57	0.9924	Lee et al., 2012
	OTU.sym16	D_7_Symbiodinium	0.999527	KC816641.1	Cladocopium sp. clade C	231	231	0.95	1e-56	0.9923	Slapeta and Linares, 2013
	OTU.sym16	D_7_Symbiodinium	0.999527	L13718.1	Symbiodinium meandrinae	224	224	0.96	2e-54	0.9771	McNally et al., 1994
	OTU.sym16	D_7_Symbiodinium	0.987979	KC816641.1	Cladocopium sp. clade C	228	228	0.96	4e-56	0.9847	Slapeta and Linares, 2013
	OTU.sym16	D_7_Symbiodinium	0.987979	HM067611.1	Symbiodinium sp. 4-91	226	226	0.95	1e-55	0.9846	Lee et al., 2012
	OTU.sym16	D_7_Symbiodinium	0.987979	MH702354.1	Symbiodinium sp. clade F4	222	222	0.95	6e-54	0.9769	Decelle et al., 2018
	OTU.sym16	D_7_Symbiodinium	0.987979	MH702343.1	Symbiodinium sp. clade H	219	219	0.96	2e-53	0.9695	Decelle et al., 2018
	OTU.sym18	D_7_Symbiodinium	0.997998	LK934671.1	Breviolum psygmophilum	233	233	1	3e-57	0.9924	Lee et al. 2017 (Unpublish thesis)
	OTU.sym18	D_7_Symbiodinium	0.997998	LK934670.1	Breviolum minutum	233	233	1	3e-57	0.9924	Lee et al. 2017 (Unpublish thesis)
	OTU.sym18	D_7_Symbiodinium	0.997998	AB016722.2	Symbiodinium sp. JCUCS-1/CladeB	233	233	1	3e-57	0.9924	Carlos et al., 1999
	OTU.sym18	D_7_Symbiodinium	0.997998	AY443023.1	Symbiodinium sp. ex Aiptasia pallida	228	228	1	4e-56	0.9847	Saldarriaga et al., 2004
	OTU.sym18	D_7_Symbiodinium	0.997998	AF238257.1	Symbiodinium sp. type B	228	228	1	4e-56	0.9847	Toller et al., 2001
	OTU.sym19	D_7_Symbiodinium	0.994028	MH702341.1	Durusdunium trenchii	233	233	1	3e-57	0.9924	Decelle et al., 2018
	OTU.sym19	D_7_Symbiodinium	0.994028	AY165766.1	Symbiodinium sp. ex Phyllodesmium briareum	233	233	1	3e-57	0.9924	Waegele et al., 2003
	OTU.sym19	D_7_Symbiodinium	0.994028	AF238261.1	Symbiodinium sp. clade E	233	233	1	3e-57	0.9924	Toller et al., 2001
	OTU.sym19	D_7_Symbiodinium	0.994028	KR476823.1	Effrenium voratum	228	228	1	4e-56	0.9847	Anu Baburaj et al. (Unpublish)
	OTU.sym20	D_7_Symbiodinium	0.742593	LC361448.1	Ansanella natalensis	228	228	1	4e-56	0.9847	Dawut et al., 2018
	OTU.sym20	D_7_Symbiodinium	0.742593	HG792066.1	Ansanella granifera	228	228	1	4e-56	0.9847	Jeong et al., 2014
	OTU.sym20	D_7_Symbiodinium	0.742593	GQ375263.1	Polarella glacialis	224	224	1	2e-54	0.9771	Potvin and Lovejoy, 2009
	OTU.sym21	D_7_Symbiodinium	0.978735	LK934674.1	Symbiodinium sp. CCMP2456	237	237	1	8e-59	1	Lee et al. 2017 (Unpublish thesis)
	OTU.sym21	D_7_Symbiodinium	0.978735	LK934672.1	Symbiodinium sp. CCMP828	237	237	1	8e-59	1	Lee et al. 2017 (Unpublish thesis)
	OTU.sym21	D_7_Symbiodinium	0.978735	LK934669.1	Symbiodinium microadriaticum	237	237	1	8e-59	1	Lee et al. 2017 (Unpublish thesis)
	OTU.sym21	D_7_Symbiodinium	0.978735	X62650.1	Symbiodinium pilosum	237	237	1	8e-59	1	Medlin et al., 1988
	OTU.sym21	D_7_Symbiodinium	0.978735	L13717.1	Symbiodinium corculorum	237	237	1	8e-59	1	McNally et al., 1994
	OTU.sym21	D_7_Symbiodinium	0.978735	KR817720.1	Symbiodinium sp. clade A	233	233	0.98	9e-58	1	Mordret et al., 2016
	OTU.sym22	D_7_Symbiodinium	0.977772	MH702341.1	Durusdunium trenchii	260	260	0.9	9e-66	1	Decelle et al., 2018
	OTU.sym22	D_7_Symbiodinium	0.977772	AY165766.1	Symbiodinium sp. ex Phyllodesmium briareum	260	260	0.9	9e-66	1	Waegele et al., 2003
	OTU.sym22	D_7_Symbiodinium	0.977772	AF238261.1	Symbiodinium sp. clade E	260	260	0.9	9e-66	1	Toller et al., 2001
	OTU.sym22	D_7_Symbiodinium	0.977772	KR476823.1	Effrenium voratum	251	251	0.9	4e-63	0.9861	Anu Baburaj et al. (Unpublish)
	OTU.sym22	D_7_Symbiodinium	0.977772	LK934675.1	Effrenium voratum	251	251	0.9	4e-63	0.9861	Lee et al. 2017 (Unpublish thesis)
	OTU.sym22	D_7_Symbiodinium	0.977772	LK934672.1	Symbiodinium sp. CCMP828	251	251	0.9	4e-63	0.9861	Lee et al. 2017 (Unpublish thesis)
