# Supplementary material for: Diversity and distribution of Symbiodiniaceae detected on coral reefs of Lombok, Indonesia using environmental DNA metabarcoding
Source: PeerJ. 2022 Oct 24;10:e14006. doi: 10.7717/peerj.14006 (PMC9610659; doi:10.7717/peerj.14006)
Supplement: File S4 [file peerj-10-14006-s005.xlsx]

## Sheet: Sequences_reference
Reference_id	Accession	Empire	Kingdom	Subkingdom	Superphylum	Phylum	Superclass	Class	Order	Family	Genus/ clade	Species/ subclade	BLAST	Database Reference	Sequence
SymV9_1	AF099183.1	Eukaryota	Chromista	Harosa (Supergroup SAR)	Alveolata	Miozoa	Dinoflagellata	Dinophyceae	Suessiales	Suessiaceae	Polarella	Polarella sp.	Yes	NCBI	Please using accession number to look at blast.ncbi
SymV9_2	AF238257.1	Eukaryota	Chromista	Harosa (Supergroup SAR)	Alveolata	Miozoa	Dinoflagellata	Dinophyceae	Suessiales	Symbiodiniaceae	Breviolum/ clade B	Breviolum sp.	Yes	NCBI	Please using accession number to look at blast.ncbi
SymV9_3	AF238258.1	Eukaryota	Chromista	Harosa (Supergroup SAR)	Alveolata	Miozoa	Dinoflagellata	Dinophyceae	Suessiales	Symbiodiniaceae	Cladocopium/ clade C	Cladocopium sp.	Yes	NCBI	Please using accession number to look at blast.ncbi
SymV9_4	AF238261.1	Eukaryota	Chromista	Harosa (Supergroup SAR)	Alveolata	Miozoa	Dinoflagellata	Dinophyceae	Suessiales	Symbiodiniaceae	Durusdinium/ clade D1	Durusdinium sp./ clade D1	Yes	NCBI	Please using accession number to look at blast.ncbi
SymV9_5	AF396631.1	Eukaryota	Chromista	Harosa (Supergroup SAR)	Alveolata	Miozoa	Dinoflagellata	Dinophyceae	Suessiales	Symbiodiniaceae	Durusdinium/ clade D1	Durusdinium sp./ clade D1a	Yes	NCBI	Please using accession number to look at blast.ncbi
SymV9_6	AY443023.1	Eukaryota	Chromista	Harosa (Supergroup SAR)	Alveolata	Miozoa	Dinoflagellata	Dinophyceae	Suessiales	Symbiodiniaceae	Breviolum/ clade B	Breviolum sp.	Yes	NCBI	Please using accession number to look at blast.ncbi
SymV9_7	EF016922.1	Eukaryota	Chromista	Harosa (Supergroup SAR)	Alveolata	Miozoa	Dinoflagellata	Dinophyceae	Suessiales	Suessiaceae	Piscinoodinium	Piscinoodinium sp.	Yes	NCBI	Please using accession number to look at blast.ncbi
SymV9_8	EF016923.1	Eukaryota	Chromista	Harosa (Supergroup SAR)	Alveolata	Miozoa	Dinoflagellata	Dinophyceae	Suessiales	Suessiaceae	Piscinoodinium	Piscinoodinium sp.	Yes	NCBI	Please using accession number to look at blast.ncbi
SymV9_9	EF036539.1	Eukaryota	Chromista	Harosa (Supergroup SAR)	Alveolata	Miozoa	Dinoflagellata	Dinophyceae	Suessiales	Symbiodiniaceae	Cladocopium/ clade C	Cladocopium sp.	Yes	NCBI	Please using accession number to look at blast.ncbi
SymV9_10	EF526860.1	Eukaryota	Chromista	Harosa (Supergroup SAR)	Alveolata	Miozoa	Dinoflagellata	Dinophyceae	Suessiales	Suessiaceae	Unclassified	Unclassified	Yes	NCBI	Please using accession number to look at blast.ncbi
SymV9_11	EU074906.1	Eukaryota	Chromista	Harosa (Supergroup SAR)	Alveolata	Miozoa	Dinoflagellata	Dinophyceae	Suessiales	Symbiodiniaceae	Durusdinium/ clade D1	Durusdinium sp./ clade D1	Yes	NCBI	Please using accession number to look at blast.ncbi
SymV9_12	GQ375263.1	Eukaryota	Chromista	Harosa (Supergroup SAR)	Alveolata	Miozoa	Dinoflagellata	Dinophyceae	Suessiales	Suessiaceae	Polarella	Polarella sp.	Yes	NCBI	Please using accession number to look at blast.ncbi
SymV9_13	HE653238.1	Eukaryota	Chromista	Harosa (Supergroup SAR)	Alveolata	Miozoa	Dinoflagellata	Dinophyceae	Suessiales	Symbiodiniaceae	Effrenium/ clade E	Effrenium sp.	Yes	NCBI	Please using accession number to look at blast.ncbi
SymV9_14	HG792066.1	Eukaryota	Chromista	Harosa (Supergroup SAR)	Alveolata	Miozoa	Dinoflagellata	Dinophyceae	Suessiales	Suessiaceae	Ansanella	Ansanella sp.	Yes	NCBI	Please using accession number to look at blast.ncbi
SymV9_15	HM067611.1	Eukaryota	Chromista	Harosa (Supergroup SAR)	Alveolata	Miozoa	Dinoflagellata	Dinophyceae	Suessiales	Symbiodiniaceae	Cladocopium/ clade C	Cladocopium sp.	Yes	NCBI	Please using accession number to look at blast.ncbi
SymV9_16	HM067612.1	Eukaryota	Chromista	Harosa (Supergroup SAR)	Alveolata	Miozoa	Dinoflagellata	Dinophyceae	Suessiales	Symbiodiniaceae	Cladocopium/ clade C	Cladocopium sp.	Yes	NCBI	Please using accession number to look at blast.ncbi
SymV9_17	HM067613.1	Eukaryota	Chromista	Harosa (Supergroup SAR)	Alveolata	Miozoa	Dinoflagellata	Dinophyceae	Suessiales	Symbiodiniaceae	Cladocopium/ clade C	Cladocopium sp.	Yes	NCBI	Please using accession number to look at blast.ncbi
SymV9_18	JQ516162.1	Eukaryota	Chromista	Harosa (Supergroup SAR)	Alveolata	Miozoa	Dinoflagellata	Dinophyceae	Suessiales	Symbiodiniaceae	Gerakladium/ clade G1	Gerakladium sp./ clade G2	Yes	NCBI	Please using accession number to look at blast.ncbi
SymV9_19	KC816640.1	Eukaryota	Chromista	Harosa (Supergroup SAR)	Alveolata	Miozoa	Dinoflagellata	Dinophyceae	Suessiales	Symbiodiniaceae	Cladocopium/ clade C	Cladocopium sp.	Yes	NCBI	Please using accession number to look at blast.ncbi
SymV9_20	KC816641.1	Eukaryota	Chromista	Harosa (Supergroup SAR)	Alveolata	Miozoa	Dinoflagellata	Dinophyceae	Suessiales	Symbiodiniaceae	Cladocopium/ clade C	Cladocopium sp.	Yes	NCBI	Please using accession number to look at blast.ncbi
SymV9_21	KC816642.1	Eukaryota	Chromista	Harosa (Supergroup SAR)	Alveolata	Miozoa	Dinoflagellata	Dinophyceae	Suessiales	Symbiodiniaceae	Cladocopium/ clade C	Cladocopium sp.	Yes	NCBI	Please using accession number to look at blast.ncbi
SymV9_22	KF129808.1	Eukaryota	Chromista	Harosa (Supergroup SAR)	Alveolata	Miozoa	Dinoflagellata	Dinophyceae	Suessiales	Suessiaceae	Unclassified	Unclassified	Yes	NCBI	Please using accession number to look at blast.ncbi
SymV9_23	KF446617.1	Eukaryota	Chromista	Harosa (Supergroup SAR)	Alveolata	Miozoa	Dinoflagellata	Dinophyceae	Suessiales	Borghiellaceae	Borghiella	Borghiella sp.	Yes	NCBI	Please using accession number to look at blast.ncbi
SymV9_24	KP404862.1	Eukaryota	Chromista	Harosa (Supergroup SAR)	Alveolata	Miozoa	Dinoflagellata	Dinophyceae	Suessiales	Suessiaceae	Unclassified	Unclassified	Yes	NCBI	Please using accession number to look at blast.ncbi
SymV9_25	KR476823.1	Eukaryota	Chromista	Harosa (Supergroup SAR)	Alveolata	Miozoa	Dinoflagellata	Dinophyceae	Suessiales	Symbiodiniaceae	Durusdinium/ clade D1	Durusdinium sp./ clade D1	Yes	NCBI	Please using accession number to look at blast.ncbi
SymV9_26	KR817720.1	Eukaryota	Chromista	Harosa (Supergroup SAR)	Alveolata	Miozoa	Dinoflagellata	Dinophyceae	Suessiales	Symbiodiniaceae	Symbiodinium/ clade A	Symbiodinium sp.	Yes	NCBI	Please using accession number to look at blast.ncbi
SymV9_27	KY980102.1	Eukaryota	Chromista	Harosa (Supergroup SAR)	Alveolata	Miozoa	Dinoflagellata	Dinophyceae	Suessiales	Suessiaceae	Protodinium	Protodinium sp.	Yes	NCBI	Please using accession number to look at blast.ncbi
SymV9_28	L13717.1	Eukaryota	Chromista	Harosa (Supergroup SAR)	Alveolata	Miozoa	Dinoflagellata	Dinophyceae	Suessiales	Symbiodiniaceae	Symbiodinium/ clade A	Symbiodinium sp.	Yes	NCBI	Please using accession number to look at blast.ncbi
SymV9_29	L13718.1	Eukaryota	Chromista	Harosa (Supergroup SAR)	Alveolata	Miozoa	Dinoflagellata	Dinophyceae	Suessiales	Symbiodiniaceae	Symbiodinium/ clade A	Symbiodinium sp.	Yes	NCBI	Please using accession number to look at blast.ncbi
SymV9_30	LC068836.1	Eukaryota	Chromista	Harosa (Supergroup SAR)	Alveolata	Miozoa	Dinoflagellata	Dinophyceae	Suessiales	Suessiaceae	Asulcocephalium	Asulcocephalium sp.	Yes	NCBI	Please using accession number to look at blast.ncbi
SymV9_31	LC068838.1	Eukaryota	Chromista	Harosa (Supergroup SAR)	Alveolata	Miozoa	Dinoflagellata	Dinophyceae	Suessiales	Suessiaceae	Asulcocephalium	Asulcocephalium sp.	Yes	NCBI	Please using accession number to look at blast.ncbi
SymV9_32	LC068840.1	Eukaryota	Chromista	Harosa (Supergroup SAR)	Alveolata	Miozoa	Dinoflagellata	Dinophyceae	Suessiales	Suessiaceae	Leiocephalium	Leiocephalium sp.	Yes	NCBI	Please using accession number to look at blast.ncbi
SymV9_33	LC272997.1	Eukaryota	Chromista	Harosa (Supergroup SAR)	Alveolata	Miozoa	Dinoflagellata	Dinophyceae	Suessiales	Borghiellaceae	Dactylodinium	Dactylodinium sp.	Yes	NCBI	Please using accession number to look at blast.ncbi
SymV9_34	LC361448.1	Eukaryota	Chromista	Harosa (Supergroup SAR)	Alveolata	Miozoa	Dinoflagellata	Dinophyceae	Suessiales	Suessiaceae	Ansanella	Ansanella sp.	Yes	NCBI	Please using accession number to look at blast.ncbi
SymV9_35	LC485280.1	Eukaryota	Chromista	Harosa (Supergroup SAR)	Alveolata	Miozoa	Dinoflagellata	Dinophyceae	Suessiales	Borghiellaceae	Dactylodinium	Dactylodinium sp.	Yes	NCBI	Please using accession number to look at blast.ncbi
SymV9_36	LK934669.1	Eukaryota	Chromista	Harosa (Supergroup SAR)	Alveolata	Miozoa	Dinoflagellata	Dinophyceae	Suessiales	Symbiodiniaceae	Symbiodinium/ clade A	Symbiodinium sp.	Yes	NCBI	Please using accession number to look at blast.ncbi
SymV9_37	LK934670.1	Eukaryota	Chromista	Harosa (Supergroup SAR)	Alveolata	Miozoa	Dinoflagellata	Dinophyceae	Suessiales	Symbiodiniaceae	Breviolum/ clade B	Breviolum sp.	Yes	NCBI	Please using accession number to look at blast.ncbi
SymV9_38	LK934671.1	Eukaryota	Chromista	Harosa (Supergroup SAR)	Alveolata	Miozoa	Dinoflagellata	Dinophyceae	Suessiales	Symbiodiniaceae	Breviolum/ clade B	Breviolum sp.	Yes	NCBI	Please using accession number to look at blast.ncbi
SymV9_39	LK934672.1	Eukaryota	Chromista	Harosa (Supergroup SAR)	Alveolata	Miozoa	Dinoflagellata	Dinophyceae	Suessiales	Symbiodiniaceae	Symbiodinium/ clade A	Symbiodinium sp.	Yes	NCBI	Please using accession number to look at blast.ncbi
SymV9_40	LK934674.1	Eukaryota	Chromista	Harosa (Supergroup SAR)	Alveolata	Miozoa	Dinoflagellata	Dinophyceae	Suessiales	Symbiodiniaceae	Symbiodinium/ clade A	Symbiodinium sp.	Yes	NCBI	Please using accession number to look at blast.ncbi
SymV9_41	LK934675.1	Eukaryota	Chromista	Harosa (Supergroup SAR)	Alveolata	Miozoa	Dinoflagellata	Dinophyceae	Suessiales	Symbiodiniaceae	Effrenium/ clade E	Effrenium sp.	Yes	NCBI	Please using accession number to look at blast.ncbi
SymV9_42	LN898222.1	Eukaryota	Chromista	Harosa (Supergroup SAR)	Alveolata	Miozoa	Dinoflagellata	Dinophyceae	Suessiales	Suessiaceae	Yihiella	Yihiella sp.	Yes	NCBI	Please using accession number to look at blast.ncbi
SymV9_43	MH702341.1	Eukaryota	Chromista	Harosa (Supergroup SAR)	Alveolata	Miozoa	Dinoflagellata	Dinophyceae	Suessiales	Symbiodiniaceae	Durusdinium/ clade D1	Durusdinium sp./ clade D1	Yes	NCBI	Please using accession number to look at blast.ncbi
SymV9_44	MH702342.1	Eukaryota	Chromista	Harosa (Supergroup SAR)	Alveolata	Miozoa	Dinoflagellata	Dinophyceae	Suessiales	Symbiodiniaceae	Halluxium/ clade H	Halluxium sp.	Yes	NCBI	Please using accession number to look at blast.ncbi
SymV9_45	MH702343.1	Eukaryota	Chromista	Harosa (Supergroup SAR)	Alveolata	Miozoa	Dinoflagellata	Dinophyceae	Suessiales	Symbiodiniaceae	Halluxium/ clade H	Halluxium sp.	Yes	NCBI	Please using accession number to look at blast.ncbi
SymV9_46	MH702348.1	Eukaryota	Chromista	Harosa (Supergroup SAR)	Alveolata	Miozoa	Dinoflagellata	Dinophyceae	Suessiales	Symbiodiniaceae	Clade Fr2	Clade Fr2	Yes	NCBI	Please using accession number to look at blast.ncbi
SymV9_47	MH702350.1	Eukaryota	Chromista	Harosa (Supergroup SAR)	Alveolata	Miozoa	Dinoflagellata	Dinophyceae	Suessiales	Symbiodiniaceae	Freudhentalidium/ clade F3	Freudhentalidium sp.	Yes	NCBI	Please using accession number to look at blast.ncbi
SymV9_48	MH702353.1	Eukaryota	Chromista	Harosa (Supergroup SAR)	Alveolata	Miozoa	Dinoflagellata	Dinophyceae	Suessiales	Symbiodiniaceae	Clade Fr4	Clade Fr4	Yes	NCBI	Please using accession number to look at blast.ncbi
SymV9_49	MH702354.1	Eukaryota	Chromista	Harosa (Supergroup SAR)	Alveolata	Miozoa	Dinoflagellata	Dinophyceae	Suessiales	Symbiodiniaceae	Clade Fr4	Clade Fr4	Yes	NCBI	Please using accession number to look at blast.ncbi
SymV9_50	MN891785.1	Eukaryota	Chromista	Harosa (Supergroup SAR)	Alveolata	Miozoa	Dinoflagellata	Dinophyceae	Suessiales	Symbiodiniaceae	Durusdinium/ clade D1	Durusdinium sp./ clade D1	Yes	NCBI	Please using accession number to look at blast.ncbi
SymV9_51	MN891786.1	Eukaryota	Chromista	Harosa (Supergroup SAR)	Alveolata	Miozoa	Dinoflagellata	Dinophyceae	Suessiales	Symbiodiniaceae	Durusdinium/ clade D1	Durusdinium sp./ clade D1	Yes	NCBI	Please using accession number to look at blast.ncbi
SymV9_52	U37406.1	Eukaryota	Chromista	Harosa (Supergroup SAR)	Alveolata	Miozoa	Dinoflagellata	Dinophyceae	Suessiales	Suessiaceae	Pelagodinium	Pelagodinium sp.	Yes	NCBI	Please using accession number to look at blast.ncbi
SymV9_53	X62650.1	Eukaryota	Chromista	Harosa (Supergroup SAR)	Alveolata	Miozoa	Dinoflagellata	Dinophyceae	Suessiales	Symbiodiniaceae	Symbiodinium/ clade A	Symbiodinium sp.	Yes	NCBI	Please using accession number to look at blast.ncbi
SymV9_54	AB016581	Eukaryota	Chromista	Harosa (Supergroup SAR)	Alveolata	Miozoa	Dinoflagellata	Dinophyceae	Suessiales	Symbiodiniaceae	Symbiodinium/ clade A	Symbiodinium sp.	No	Decelle et al. 2018	gtcgctcctaccgattgagtgatccggtgaattattcggactgacgcagtgctcagcttctggacgttgcgttggaaagtttcatgaaccttatcacttagaggaaggagaantcgtaacaaggtttcc
SymV9_55	AB016595	Eukaryota	Chromista	Harosa (Supergroup SAR)	Alveolata	Miozoa	Dinoflagellata	Dinophyceae	Suessiales	Symbiodiniaceae	Cladocopium/ clade C	Cladocopium sp.	No	Decelle et al. 2018	gtcgctcctaccgattgagtgatccggtgaataattcggactgacgcagtgctcagcttctggacgttgcgtcggaaagtttcatgaaccttatcacttagaggaaggagaagtcgtaacaaggtttcc
SymV9_56	AB016722	Eukaryota	Chromista	Harosa (Supergroup SAR)	Alveolata	Miozoa	Dinoflagellata	Dinophyceae	Suessiales	Symbiodiniaceae	Breviolum/ clade B	Breviolum sp.	No	Decelle et al. 2018	gtcgctcctaccgattgagtgatccggtgaataattcggactgacgcagtgctcagcttctggacgttgtgttggaaagtttcatgaaccttatcacttagaggaaggagaagtcgtaacaaggtttcc
SymV9_57	AB085914	Eukaryota	Chromista	Harosa (Supergroup SAR)	Alveolata	Miozoa	Dinoflagellata	Dinophyceae	Suessiales	Symbiodiniaceae	Durusdinium/ clade D1	Durusdinium sp./ clade DX	No	Decelle et al. 2018	gtcgctcctaccgattgagtgatccggtgaataactcggactgacgcagtgttcagcttctggacgttgcgttggaaagtttcatgaaccttatcacttagaggaaggagaagtcgtaacaa
SymV9_58	AF225965	Eukaryota	Chromista	Harosa (Supergroup SAR)	Alveolata	Miozoa	Dinoflagellata	Dinophyceae	Suessiales	Symbiodiniaceae	Effrenium/ clade E	Effrenium sp.	No	Decelle et al. 2018	gtcgctcctaccgattgagtgatccggtgaataattcggactgacgcagtgctcagcttctggacgttgcgttggaaagcttcatgaaccttatcacttagaggaaggagaagtcgtaacaaggtttcc
SymV9_59	AF274279	Eukaryota	Chromista	Harosa (Supergroup SAR)	Alveolata	Miozoa	Dinoflagellata	Dinophyceae	Suessiales	Symbiodiniaceae	Effrenium/ clade E	Effrenium sp.	No	Decelle et al. 2018	gtcgctcctaccgattgagtgatccggtgaataattcggactgacgcagtgctcagcttctggacgttgcgttggaaagcttcatgaaccttatcacttagaggaaggagaagtcgtaacaaggtttcc
SymV9_60	AY165766	Eukaryota	Chromista	Harosa (Supergroup SAR)	Alveolata	Miozoa	Dinoflagellata	Dinophyceae	Suessiales	Symbiodiniaceae	Durusdinium/ clade D1	Durusdinium sp./ clade D1	No	Decelle et al. 2018	gtcgctcctaccgattgagtgatccggtgaataactcggactgacgcagtgctcagcttctggacgttgcgttggaaagtttcatgaaccttatcacttagaggaaggagaagtcgtaacaaggtttcc
SymV9_61	AB016573	Eukaryota	Chromista	Harosa (Supergroup SAR)	Alveolata	Miozoa	Dinoflagellata	Dinophyceae	Suessiales	Symbiodiniaceae	Symbiodinium/ clade A	Symbiodinium sp.	No	Decelle et al. 2018	gtcgctcctaccgattgagtgatccggtgaattattcggactgacgcagtgctcagcttctggacgttgcgttggaaagtttcatgaaccttatcacttagaggaaggagaagtcgtaacaaggtttcc
SymV9_62	HF568830	Eukaryota	Chromista	Harosa (Supergroup SAR)	Alveolata	Miozoa	Dinoflagellata	Dinophyceae	Suessiales	Symbiodiniaceae	Effrenium/ clade E	Effrenium sp.	No	Decelle et al. 2018	gtcgctcctaccgattgagtgatccggtgaataattcggactgacgcagtgctcagcttctggacgttgcgttggaaagcttcatgaaccttatcacttagaggaaggagaagtcgtaacaaggtttcc
SymV9_63	HF568834	Eukaryota	Chromista	Harosa (Supergroup SAR)	Alveolata	Miozoa	Dinoflagellata	Dinophyceae	Suessiales	Symbiodiniaceae	Effrenium/ clade E	Effrenium sp.	No	Decelle et al. 2018	gtcgctcctaccgattgagtgatccggtgaataattcggactgacgcagtgctcagcttctggacgttgcgttggaaagcttcatgaaccttatcacttagaggaaggagaagtcgtaacaaggtttcc
SymV9_64	HM067608	Eukaryota	Chromista	Harosa (Supergroup SAR)	Alveolata	Miozoa	Dinoflagellata	Dinophyceae	Suessiales	Symbiodiniaceae	Cladocopium/ clade C	Cladocopium sp.	No	Decelle et al. 2018	gtcgctcctaccgattgagtgatccggtgaataattcggactgacgcagtgctcagcttctggaggttgcgtcggaaagtttcatgaaccttatcacttagaggaaggagaagtcgtaacaaggtttct
SymV9_65	M88509	Eukaryota	Chromista	Harosa (Supergroup SAR)	Alveolata	Miozoa	Dinoflagellata	Dinophyceae	Suessiales	Symbiodiniaceae	Breviolum/ clade B	Breviolum sp.	No	Decelle et al. 2018	gtcgctcctaccgattgagtgatccggtgaataattcggactgacgcagtgctcagcttctggacgttgtgttggaaagtttcatgaaccttatcacttagaggaaggagaagtcgtaacaaggtttcc
SymV9_66	M88521	Eukaryota	Chromista	Harosa (Supergroup SAR)	Alveolata	Miozoa	Dinoflagellata	Dinophyceae	Suessiales	Symbiodiniaceae	Symbiodinium/ clade A	Symbiodinium microadriticum	No	Decelle et al. 2018	gtcgctcctaccgattgagtgatccggtgaattattcggactgacgcagtgctcagcttctggacgttgcgttggaaagtttcatgaaccttatcacttagaggaaggagaagtcgtaacaaggtttcc
SymV9_67	MMETSP1371_CAMNT_0047737719	Eukaryota	Chromista	Harosa (Supergroup SAR)	Alveolata	Miozoa	Dinoflagellata	Dinophyceae	Suessiales	Symbiodiniaceae	Cladocopium/ clade C	Cladocopium sp./ clade C15	No	Decelle et al. 2018	gtcgctcctaccgattgagtgatccggtgaataattcggactgacgcagtgctcagcttctggacgttgcgtcggaaagtttcatgaaccttatcacttagaggaaggagaagtcgtaacaaggtttcc
SymV9_68	CladeE_V9_CCMP421	Eukaryota	Chromista	Harosa (Supergroup SAR)	Alveolata	Miozoa	Dinoflagellata	Dinophyceae	Suessiales	Symbiodiniaceae	Effrenium/ clade E	Effrenium sp.	No	Decelle et al. 2018	gtcgctcctaccgattgagtgatccggtgaataattcggactgacgcagtgctcagcttctggacgttgcgttggaaagcttcatgaaccttatcacttagaggaaggagaagtcgtaacaaggtttcc
SymV9_69	MH702344_CladeF2_V9_206J	Eukaryota	Chromista	Harosa (Supergroup SAR)	Alveolata	Miozoa	Dinoflagellata	Dinophyceae	Suessiales	Symbiodiniaceae	Clade Fr2	Clade Fr2	No	Decelle et al. 2018	gtcgctcctaccgattgagtgatccggtgaatcattcggactgacgcagtgctcagcttctggacgttgcgttggaaagtttcatgaaccttatcacttagaggaaggagaagtcgtaacaaggtttcc
SymV9_70	MH702349_CladeF3_V9_5243X	Eukaryota	Chromista	Harosa (Supergroup SAR)	Alveolata	Miozoa	Dinoflagellata	Dinophyceae	Suessiales	Symbiodiniaceae	Freudhentalidium/ clade F3	Freudhentalidium sp.	No	Decelle et al. 2018	gtcgctcctaccgattgagtgatccggtgaatcattcggactgatgcagtgctcagcttctggacgttgcgttggaaagtttcatgaaccttatcacttagaggaaggagaagtcgtaacaaggtttcc
SymV9_71	MH702351_CladeF4_V9_1350X	Eukaryota	Chromista	Harosa (Supergroup SAR)	Alveolata	Miozoa	Dinoflagellata	Dinophyceae	Suessiales	Symbiodiniaceae	Clade Fr4	Clade Fr4	No	Decelle et al. 2018	gtcgctcctaccgattgagtgatccggtgaataattcggactgatgcagtgctcagcttctggacgttgcgttggaaagtttcatgaaccttatcacttagaggaaggagaagtcgtaacaaggtttcc
SymV9_72	MH702366_CladeG2_V9_7221	Eukaryota	Chromista	Harosa (Supergroup SAR)	Alveolata	Miozoa	Dinoflagellata	Dinophyceae	Suessiales	Symbiodiniaceae	Gerakladium/ clade G2	Gerakladium sp./ clade G2	No	Decelle et al. 2018	gtcgctcctaccgattgagtgatccggtgaatcattcggactgatgcagtgctcagcttctgggcgttgcgttggaaagtttcatgaaccttatcacttagaggaaggagaagtcgtaacaaggtttcc
SymV9_73	AB085911.1	Eukaryota	Chromista	Harosa (Supergroup SAR)	Alveolata	Miozoa	Dinoflagellata	Dinophyceae	Suessiales	Symbiodiniaceae	Symbiodinium/ clade A	Symbiodinium sp.	No	NCBI/Loh et al. 2006	Please using accession number to look at blast.ncbi
SymV9_74	AB085912.1	Eukaryota	Chromista	Harosa (Supergroup SAR)	Alveolata	Miozoa	Dinoflagellata	Dinophyceae	Suessiales	Symbiodiniaceae	Cladocopium/ clade C	Cladocopium sp.	No	NCBI/Loh et al. 2006	Please using accession number to look at blast.ncbi
SymV9_75	AB085913.1	Eukaryota	Chromista	Harosa (Supergroup SAR)	Alveolata	Miozoa	Dinoflagellata	Dinophyceae	Suessiales	Symbiodiniaceae	Symbiodinium/ clade A	Symbiodinium sp.	No	NCBI/Loh et al. 2006	Please using accession number to look at blast.ncbi
SymV9_76	AY903340.1	Eukaryota	Chromista	Harosa (Supergroup SAR)	Alveolata	Miozoa	Dinoflagellata	Dinophyceae	Suessiales	Symbiodiniaceae	Durusdinium/ clade D1	Durusdinium sp./ clade D1	No	NCBI/Loh et al. 2006	Please using accession number to look at blast.ncbi
SymV9_77	AY903341.1	Eukaryota	Chromista	Harosa (Supergroup SAR)	Alveolata	Miozoa	Dinoflagellata	Dinophyceae	Suessiales	Symbiodiniaceae	Cladocopium/ clade C	Cladocopium sp.	No	NCBI/Loh et al. 2006	Please using accession number to look at blast.ncbi
SymV9_78	AY903343.1	Eukaryota	Chromista	Harosa (Supergroup SAR)	Alveolata	Miozoa	Dinoflagellata	Dinophyceae	Suessiales	Symbiodiniaceae	Durusdinium/ clade D1	Durusdinium sp./ clade D1	No	NCBI/Loh et al. 2006	Please using accession number to look at blast.ncbi
SymV9_79	AY903344.1	Eukaryota	Chromista	Harosa (Supergroup SAR)	Alveolata	Miozoa	Dinoflagellata	Dinophyceae	Suessiales	Symbiodiniaceae	Breviolum/ clade B	Brevolium sp.	No	NCBI/Loh et al. 2006	Please using accession number to look at blast.ncbi
SymV9_80	AY903345.1	Eukaryota	Chromista	Harosa (Supergroup SAR)	Alveolata	Miozoa	Dinoflagellata	Dinophyceae	Suessiales	Symbiodiniaceae	Breviolum/ clade B	Brevolium sp.	No	NCBI/Loh et al. 2006	Please using accession number to look at blast.ncbi
SymV9_81	AY903346.1	Eukaryota	Chromista	Harosa (Supergroup SAR)	Alveolata	Miozoa	Dinoflagellata	Dinophyceae	Suessiales	Symbiodiniaceae	Cladocopium/ clade C	Cladocopium sp.	No	NCBI/Loh et al. 2006	Please using accession number to look at blast.ncbi
SymV9_82	DQ227700.1	Eukaryota	Chromista	Harosa (Supergroup SAR)	Alveolata	Miozoa	Dinoflagellata	Dinophyceae	Suessiales	Symbiodiniaceae	Cladocopium/ clade C	Cladocopium sp.	No	NCBI/Loh et al. 2006	Please using accession number to look at blast.ncbi
