# Supplementary material for: Diversity and distribution of Symbiodiniaceae detected on coral reefs of Lombok, Indonesia using environmental DNA metabarcoding
Source: PeerJ. 2022 Oct 24;10:e14006. doi: 10.7717/peerj.14006 (PMC9610659; doi:10.7717/peerj.14006)
Supplement: File S5 [file peerj-10-14006-s006.xlsx]

## Sheet: Symbiodiniceae_abundance_data
Putative Symbiodiniaceae abundance data in 41 samples
Sample code	Location	Station	Media	Fraction	Sym1	Sym2	Sym3	Sym4	Sym5	Sym6	Sym7	Sym8	Sym9	Sym10	Sym11	Sym12	Sym13	Sym14	Sym15	Sym16	Sym17	Sym18	Sym19	Sym20	Sym21	Sym22
EB356	east_lombok	gili_sulat_1	seawater	>12µm	0	0	0	0	0	0	0	0	0	0	0	0	0	0	0	0	0	0	0	0	0	0
EB357	east_lombok	gili_sulat_1	sediment	0.4-12µm	185	0	0	0	0	0	0	0	0	0	0	0	0	0	0	0	0	0	0	0	0	0
EB358	east_lombok	gili_sulat_1	sediment	>12µm	0	15	6	0	0	0	0	0	0	0	0	0	0	0	0	0	0	0	0	0	0	0
EB359	east_lombok	gili_sulat_2	seawater	0.4-12µm	0	0	19	0	0	0	0	0	0	0	0	0	0	0	0	0	0	0	0	0	0	0
EB360	east_lombok	gili_sulat_2	seawater	>12µm	0	0	0	0	0	0	0	0	0	0	0	0	0	0	0	0	0	0	0	0	0	0
EB361	east_lombok	gili_sulat_2	sediment	0.4-12µm	0	0	0	0	0	0	0	0	0	0	0	0	0	23	0	0	0	0	0	14	0	0
EB362	east_lombok	gili_sulat_2	sediment	>12µm	9	0	0	0	0	0	0	0	0	0	0	0	0	0	0	0	0	0	0	0	0	0
EB363	east_lombok	gili_sulat_3	seawater	0.4-12µm	0	0	16	0	0	0	0	0	0	0	0	0	0	0	0	0	0	0	0	0	0	0
EB364	east_lombok	gili_sulat_3	seawater	>12µm	0	162	0	24	0	124	0	0	0	0	0	0	0	0	0	0	0	0	0	0	0	0
EB365	east_lombok	gili_sulat_3	sediment	0.4-12µm	92	0	0	0	0	0	94	0	0	0	0	0	0	0	0	0	0	0	0	0	0	0
EB366	east_lombok	gili_sulat_3	sediment	>12µm	0	47	0	0	0	0	0	0	15	0	0	0	0	0	0	0	0	0	0	0	0	0
EB367	east_lombok	gili_lawang	seawater	0.4-12µm	0	0	22	0	0	0	0	0	0	0	0	0	0	0	0	17	0	0	0	0	0	0
EB368	east_lombok	gili_lawang	seawater	>12µm	0	0	0	0	0	0	0	0	0	0	0	0	0	0	0	0	0	0	0	0	0	0
EB369	east_lombok	gili_lawang	sediment	0.4-12µm	0	0	0	112	0	0	0	0	0	32	0	0	0	0	0	0	0	0	0	0	0	0
EB370	east_lombok	gili_lawang	sediment	>12µm	0	0	14	0	0	0	0	0	0	0	0	0	0	0	0	0	0	0	0	0	0	0
EB371	east_lombok	gili_petagan	seawater	0.4-12µm	0	0	0	0	0	0	0	0	0	0	0	0	0	0	0	0	0	0	0	0	0	0
EB372	east_lombok	gili_petagan	sediment	0.4-12µm	0	0	0	0	0	0	0	0	0	0	0	0	0	0	0	0	15	0	0	0	0	0
EB373	east_lombok	gili_petagan	sediment	>12µm	0	0	0	0	0	0	0	52	0	0	0	0	0	0	0	0	0	0	0	0	0	0
EB374	east_lombok	gili_kondo	seawater	0.4-12µm	67	0	36	0	0	0	0	0	0	0	0	0	0	0	0	0	0	0	0	0	0	0
EB375	east_lombok	gili_kondo	sediment	0.4-12µm	457	0	0	24	0	0	0	0	0	0	0	0	0	0	0	0	0	0	0	0	0	0
EB376	east_lombok	gili_kondo	sediment	>12µm	121	0	0	0	0	0	0	0	0	0	0	0	0	0	0	0	0	0	0	0	0	0
EB377	west_lombok	gili_nanggu	sediment	0.4-12µm	0	0	0	0	0	0	0	0	0	0	0	0	0	0	0	0	0	0	0	0	11	0
EB378	west_lombok	bunutan_1	sediment	0.4-12µm	146	0	0	0	0	0	0	0	0	0	0	0	0	0	0	0	0	0	0	0	0	0
EB379	west_lombok	gili_rengit	sediment	0.4-12µm	0	0	0	0	167	0	0	0	0	0	0	0	0	0	0	0	0	0	0	0	0	0
EB380	west_lombok	gili_golek	sediment	0.4-12µm	0	0	0	0	0	0	0	0	0	0	0	0	0	0	0	0	0	0	0	0	0	0
EB381	west_lombok	gili_golek	sediment	>12µm	0	0	0	0	0	0	0	0	0	0	0	0	0	0	0	0	0	0	0	0	0	0
EB382	west_lombok	gili_gede	seawater	0.4-12µm	0	0	33	0	0	0	0	0	0	0	0	0	24	0	0	0	0	0	0	0	0	0
EB383	west_lombok	gili_gede	sediment	0.4-12µm	0	0	0	0	0	0	0	0	0	0	0	0	0	0	0	0	0	0	0	0	0	0
EB384	north_lombok	gili_trawangan_1	seawater	0.4-12µm	0	0	40	0	0	0	0	0	0	0	0	0	0	0	0	0	0	0	0	0	0	0
EB385	north_lombok	gili_trawangan_1	seawater	>12µm	0	0	0	0	0	0	0	0	0	0	0	0	0	0	0	0	0	0	0	0	0	0
EB386	north_lombok	gili_trawangan_1	sediment	0.4-12µm	0	43	0	0	0	0	0	0	0	0	0	0	0	0	19	0	0	0	0	0	0	2
EB387	north_lombok	gili_trawangan_1	sediment	>12µm	0	0	0	0	0	0	0	0	0	0	0	0	0	0	0	0	0	0	0	0	0	0
EB388	north_lombok	gili_trawangan_2	seawater	0.4-12µm	51	0	13	0	0	0	0	0	0	0	0	0	0	0	0	0	0	0	0	0	0	0
EB389	north_lombok	gili_trawangan_2	seawater	>12µm	0	0	0	0	0	0	0	0	0	0	0	28	0	0	0	0	0	0	0	0	0	0
EB390	north_lombok	gili_trawangan_2	sediment	0.4-12µm	71	0	0	0	0	0	0	0	0	0	0	0	0	0	0	0	0	15	0	0	0	0
EB391	north_lombok	gili_trawangan_2	sediment	>12µm	0	0	0	0	0	0	0	0	0	0	0	0	0	0	0	0	0	0	0	0	0	0
EB392	north_lombok	gili_meno	seawater	0.4-12µm	0	13	27	0	0	0	0	0	0	0	30	0	0	0	0	0	0	0	0	0	0	0
EB393	north_lombok	gili_meno	seawater	>12µm	0	0	0	0	0	0	0	0	0	0	0	0	0	0	0	0	0	0	0	0	0	0
EB394	north_lombok	gili_meno	sediment	0.4-12µm	0	0	0	34	0	0	0	0	30	0	0	0	0	0	0	0	0	0	0	0	0	0
EB395	north_lombok	gili_meno	sediment	>12µm	49	0	0	0	0	0	0	0	0	0	0	0	0	0	0	0	0	0	0	0	0	0
EB396	north_lombok	gili_air	seawater	0.4-12µm	0	0	28	0	0	0	0	0	0	0	0	0	0	0	0	0	0	0	15	0	0	0
