# Supplementary material for: Diversity and distribution of Symbiodiniaceae detected on coral reefs of Lombok, Indonesia using environmental DNA metabarcoding
Source: PeerJ. 2022 Oct 24;10:e14006. doi: 10.7717/peerj.14006 (PMC9610659; doi:10.7717/peerj.14006)
Supplement: File S8 [file peerj-10-14006-s009.xlsx]

## Sheet: Symb. Alpha Diversity Data
Alpha diversity of Symbiodiniaceae data in 41 samples
Sample code	Location	Station	Media	Fraction	n	Feature_Observed	Shannon_Enthropy
EB356	east_lombok	gili_sulat_1	seawater	>12µm	0	0	0
EB357	east_lombok	gili_sulat_1	sediment	0.4-12µm	185	1	0
EB358	east_lombok	gili_sulat_1	sediment	>12µm	21	1	0
EB359	east_lombok	gili_sulat_2	seawater	0.4-12µm	0	0	0
EB360	east_lombok	gili_sulat_2	seawater	>12µm	0	0	0
EB361	east_lombok	gili_sulat_2	sediment	0.4-12µm	0	0	0
EB362	east_lombok	gili_sulat_2	sediment	>12µm	9	1	0
EB363	east_lombok	gili_sulat_3	seawater	0.4-12µm	0	0	0
EB364	east_lombok	gili_sulat_3	seawater	>12µm	310	3	1.38306
EB365	east_lombok	gili_sulat_3	sediment	0.4-12µm	186	2	0.996317
EB366	east_lombok	gili_sulat_3	sediment	>12µm	62	1	0
EB367	east_lombok	gili_lawang	seawater	0.4-12µm	39	1	0
EB368	east_lombok	gili_lawang	seawater	>12µm	0	0	0
EB369	east_lombok	gili_lawang	sediment	0.4-12µm	144	2	0.985228
EB370	east_lombok	gili_lawang	sediment	>12µm	0	0	0
EB371	east_lombok	gili_petagan	seawater	0.4-12µm	0	0	0
EB372	east_lombok	gili_petagan	sediment	0.4-12µm	15	1	0
EB373	east_lombok	gili_petagan	sediment	>12µm	52	1	0
EB374	east_lombok	gili_kondo	seawater	0.4-12µm	103	1	0
EB375	east_lombok	gili_kondo	sediment	0.4-12µm	481	2	0.222285
EB376	east_lombok	gili_kondo	sediment	>12µm	121	1	0
EB377	west_lombok	gili_nanggu	sediment	0.4-12µm	11	1	0
EB378	west_lombok	bunutan_1	sediment	0.4-12µm	146	1	0
EB379	west_lombok	gili_rengit	sediment	0.4-12µm	167	1	0
EB380	west_lombok	gili_golek	sediment	0.4-12µm	0	0	0
EB381	west_lombok	gili_golek	sediment	>12µm	0	0	0
EB382	west_lombok	gili_gede	seawater	0.4-12µm	0	0	0
EB383	west_lombok	gili_gede	sediment	0.4-12µm	0	0	0
EB384	north_lombok	gili_trawangan_1	seawater	0.4-12µm	0	0	0
EB385	north_lombok	gili_trawangan_1	seawater	>12µm	0	0	0
EB386	north_lombok	gili_trawangan_1	sediment	0.4-12µm	64	2	0.905928
EB387	north_lombok	gili_trawangan_1	sediment	>12µm	0	0	0
EB388	north_lombok	gili_trawangan_2	seawater	0.4-12µm	64	1	0
EB389	north_lombok	gili_trawangan_2	seawater	>12µm	28	1	0
EB390	north_lombok	gili_trawangan_2	sediment	0.4-12µm	86	2	0.591673
EB391	north_lombok	gili_trawangan_2	sediment	>12µm	0	0	0
EB392	north_lombok	gili_meno	seawater	0.4-12µm	70	1	0
EB393	north_lombok	gili_meno	seawater	>12µm	0	0	0
EB394	north_lombok	gili_meno	sediment	0.4-12µm	64	1	0
EB395	north_lombok	gili_meno	sediment	>12µm	49	1	0
EB396	north_lombok	gili_air	seawater	0.4-12µm	43	1	0

## Sheet: Symb. Beta Diversity Site
Data of Bray-Curtis dissimiliarity (BC) of Symbiodiniaceae within and between site groups in 24 samples
SubjectID1	SubjectID2	Group1	Group2	BC Dissimiliarity
EB358	EB357	east_lombok	east_lombok	1
EB362	EB357	east_lombok	east_lombok	0
EB362	EB358	east_lombok	east_lombok	1
EB364	EB357	east_lombok	east_lombok	1
EB364	EB358	east_lombok	east_lombok	0.535714
EB364	EB362	east_lombok	east_lombok	1
EB365	EB357	east_lombok	east_lombok	0.464286
EB365	EB358	east_lombok	east_lombok	1
EB365	EB362	east_lombok	east_lombok	0.464286
EB365	EB364	east_lombok	east_lombok	1
EB366	EB357	east_lombok	east_lombok	1
EB366	EB358	east_lombok	east_lombok	0
EB366	EB362	east_lombok	east_lombok	1
EB366	EB364	east_lombok	east_lombok	0.535714
EB366	EB365	east_lombok	east_lombok	1
EB367	EB357	east_lombok	east_lombok	1
EB367	EB358	east_lombok	east_lombok	1
EB367	EB362	east_lombok	east_lombok	1
EB367	EB364	east_lombok	east_lombok	1
EB367	EB365	east_lombok	east_lombok	1
EB367	EB366	east_lombok	east_lombok	1
EB369	EB357	east_lombok	east_lombok	1
EB369	EB358	east_lombok	east_lombok	1
EB369	EB362	east_lombok	east_lombok	1
EB369	EB364	east_lombok	east_lombok	0.892857
EB369	EB365	east_lombok	east_lombok	1
EB369	EB366	east_lombok	east_lombok	1
EB369	EB367	east_lombok	east_lombok	1
EB372	EB357	east_lombok	east_lombok	1
EB372	EB358	east_lombok	east_lombok	1
EB372	EB362	east_lombok	east_lombok	1
EB372	EB364	east_lombok	east_lombok	1
EB372	EB365	east_lombok	east_lombok	1
EB372	EB366	east_lombok	east_lombok	1
EB372	EB367	east_lombok	east_lombok	1
EB372	EB369	east_lombok	east_lombok	1
EB373	EB357	east_lombok	east_lombok	1
EB373	EB358	east_lombok	east_lombok	1
EB373	EB362	east_lombok	east_lombok	1
EB373	EB364	east_lombok	east_lombok	1
EB373	EB365	east_lombok	east_lombok	1
EB373	EB366	east_lombok	east_lombok	1
EB373	EB367	east_lombok	east_lombok	1
EB373	EB369	east_lombok	east_lombok	1
EB373	EB372	east_lombok	east_lombok	1
EB374	EB357	east_lombok	east_lombok	0
EB374	EB358	east_lombok	east_lombok	1
EB374	EB362	east_lombok	east_lombok	0
EB374	EB364	east_lombok	east_lombok	1
EB374	EB365	east_lombok	east_lombok	0.464286
EB374	EB366	east_lombok	east_lombok	1
EB374	EB367	east_lombok	east_lombok	1
EB374	EB369	east_lombok	east_lombok	1
EB374	EB372	east_lombok	east_lombok	1
EB374	EB373	east_lombok	east_lombok	1
EB375	EB357	east_lombok	east_lombok	0.0357143
EB375	EB358	east_lombok	east_lombok	1
EB375	EB362	east_lombok	east_lombok	0.0357143
EB375	EB364	east_lombok	east_lombok	0.964286
EB375	EB365	east_lombok	east_lombok	0.464286
EB375	EB366	east_lombok	east_lombok	1
EB375	EB367	east_lombok	east_lombok	1
EB375	EB369	east_lombok	east_lombok	0.964286
EB375	EB372	east_lombok	east_lombok	1
EB375	EB373	east_lombok	east_lombok	1
EB375	EB374	east_lombok	east_lombok	0.0357143
EB376	EB357	east_lombok	east_lombok	0
EB376	EB358	east_lombok	east_lombok	1
EB376	EB362	east_lombok	east_lombok	0
EB376	EB364	east_lombok	east_lombok	1
EB376	EB365	east_lombok	east_lombok	0.464286
EB376	EB366	east_lombok	east_lombok	1
EB376	EB367	east_lombok	east_lombok	1
EB376	EB369	east_lombok	east_lombok	1
EB376	EB372	east_lombok	east_lombok	1
EB376	EB373	east_lombok	east_lombok	1
EB376	EB374	east_lombok	east_lombok	0
EB376	EB375	east_lombok	east_lombok	0.0357143
EB357	EB386	east_lombok	north_lombok	1
EB357	EB388	east_lombok	north_lombok	0
EB357	EB389	east_lombok	north_lombok	1
EB357	EB390	east_lombok	north_lombok	0.142857
EB357	EB392	east_lombok	north_lombok	1
EB357	EB394	east_lombok	north_lombok	1
EB357	EB395	east_lombok	north_lombok	0
EB357	EB396	east_lombok	north_lombok	1
EB358	EB386	east_lombok	north_lombok	0.321429
EB358	EB388	east_lombok	north_lombok	1
EB358	EB389	east_lombok	north_lombok	1
EB358	EB390	east_lombok	north_lombok	1
EB358	EB392	east_lombok	north_lombok	0
EB358	EB394	east_lombok	north_lombok	1
EB358	EB395	east_lombok	north_lombok	1
EB358	EB396	east_lombok	north_lombok	1
EB362	EB386	east_lombok	north_lombok	1
EB362	EB388	east_lombok	north_lombok	0
EB362	EB389	east_lombok	north_lombok	1
EB362	EB390	east_lombok	north_lombok	0.142857
EB362	EB392	east_lombok	north_lombok	1
EB362	EB394	east_lombok	north_lombok	1
EB362	EB395	east_lombok	north_lombok	0
EB362	EB396	east_lombok	north_lombok	1
EB364	EB386	east_lombok	north_lombok	0.535714
EB364	EB388	east_lombok	north_lombok	1
EB364	EB389	east_lombok	north_lombok	1
EB364	EB390	east_lombok	north_lombok	1
EB364	EB392	east_lombok	north_lombok	0.535714
EB364	EB394	east_lombok	north_lombok	0.892857
EB364	EB395	east_lombok	north_lombok	1
EB364	EB396	east_lombok	north_lombok	1
EB365	EB386	east_lombok	north_lombok	1
EB365	EB388	east_lombok	north_lombok	0.464286
EB365	EB389	east_lombok	north_lombok	1
EB365	EB390	east_lombok	north_lombok	0.464286
EB365	EB392	east_lombok	north_lombok	1
EB365	EB394	east_lombok	north_lombok	1
EB365	EB395	east_lombok	north_lombok	0.464286
EB365	EB396	east_lombok	north_lombok	1
EB366	EB386	east_lombok	north_lombok	0.321429
EB366	EB388	east_lombok	north_lombok	1
EB366	EB389	east_lombok	north_lombok	1
EB366	EB390	east_lombok	north_lombok	1
EB366	EB392	east_lombok	north_lombok	0
EB366	EB394	east_lombok	north_lombok	1
EB366	EB395	east_lombok	north_lombok	1
EB366	EB396	east_lombok	north_lombok	1
EB367	EB386	east_lombok	north_lombok	1
EB367	EB388	east_lombok	north_lombok	1
EB367	EB389	east_lombok	north_lombok	1
EB367	EB390	east_lombok	north_lombok	1
EB367	EB392	east_lombok	north_lombok	1
EB367	EB394	east_lombok	north_lombok	1
EB367	EB395	east_lombok	north_lombok	1
EB367	EB396	east_lombok	north_lombok	1
EB369	EB386	east_lombok	north_lombok	1
EB369	EB388	east_lombok	north_lombok	1
EB369	EB389	east_lombok	north_lombok	1
EB369	EB390	east_lombok	north_lombok	1
EB369	EB392	east_lombok	north_lombok	1
EB369	EB394	east_lombok	north_lombok	0.428571
EB369	EB395	east_lombok	north_lombok	1
EB369	EB396	east_lombok	north_lombok	1
EB372	EB386	east_lombok	north_lombok	1
EB372	EB388	east_lombok	north_lombok	1
EB372	EB389	east_lombok	north_lombok	1
EB372	EB390	east_lombok	north_lombok	1
EB372	EB392	east_lombok	north_lombok	1
EB372	EB394	east_lombok	north_lombok	1
EB372	EB395	east_lombok	north_lombok	1
EB372	EB396	east_lombok	north_lombok	1
EB373	EB386	east_lombok	north_lombok	1
EB373	EB388	east_lombok	north_lombok	1
EB373	EB389	east_lombok	north_lombok	1
EB373	EB390	east_lombok	north_lombok	1
EB373	EB392	east_lombok	north_lombok	1
EB373	EB394	east_lombok	north_lombok	1
EB373	EB395	east_lombok	north_lombok	1
EB373	EB396	east_lombok	north_lombok	1
EB374	EB386	east_lombok	north_lombok	1
EB374	EB388	east_lombok	north_lombok	0
EB374	EB389	east_lombok	north_lombok	1
EB374	EB390	east_lombok	north_lombok	0.142857
EB374	EB392	east_lombok	north_lombok	1
EB374	EB394	east_lombok	north_lombok	1
EB374	EB395	east_lombok	north_lombok	0
EB374	EB396	east_lombok	north_lombok	1
EB375	EB386	east_lombok	north_lombok	1
EB375	EB388	east_lombok	north_lombok	0.0357143
EB375	EB389	east_lombok	north_lombok	1
EB375	EB390	east_lombok	north_lombok	0.142857
EB375	EB392	east_lombok	north_lombok	1
EB375	EB394	east_lombok	north_lombok	0.964286
EB375	EB395	east_lombok	north_lombok	0.0357143
EB375	EB396	east_lombok	north_lombok	1
EB376	EB386	east_lombok	north_lombok	1
EB376	EB388	east_lombok	north_lombok	0
EB376	EB389	east_lombok	north_lombok	1
EB376	EB390	east_lombok	north_lombok	0.142857
EB376	EB392	east_lombok	north_lombok	1
EB376	EB394	east_lombok	north_lombok	1
EB376	EB395	east_lombok	north_lombok	0
EB376	EB396	east_lombok	north_lombok	1
EB357	EB377	east_lombok	west_lombok	1
EB357	EB378	east_lombok	west_lombok	0
EB357	EB379	east_lombok	west_lombok	1
EB358	EB377	east_lombok	west_lombok	1
EB358	EB378	east_lombok	west_lombok	1
EB358	EB379	east_lombok	west_lombok	1
EB362	EB377	east_lombok	west_lombok	1
EB362	EB378	east_lombok	west_lombok	0
EB362	EB379	east_lombok	west_lombok	1
EB364	EB377	east_lombok	west_lombok	1
EB364	EB378	east_lombok	west_lombok	1
EB364	EB379	east_lombok	west_lombok	1
EB365	EB377	east_lombok	west_lombok	1
EB365	EB378	east_lombok	west_lombok	0.464286
EB365	EB379	east_lombok	west_lombok	1
EB366	EB377	east_lombok	west_lombok	1
EB366	EB378	east_lombok	west_lombok	1
EB366	EB379	east_lombok	west_lombok	1
EB367	EB377	east_lombok	west_lombok	1
EB367	EB378	east_lombok	west_lombok	1
EB367	EB379	east_lombok	west_lombok	1
EB369	EB377	east_lombok	west_lombok	1
EB369	EB378	east_lombok	west_lombok	1
EB369	EB379	east_lombok	west_lombok	1
EB372	EB377	east_lombok	west_lombok	1
EB372	EB378	east_lombok	west_lombok	1
EB372	EB379	east_lombok	west_lombok	1
EB373	EB377	east_lombok	west_lombok	1
EB373	EB378	east_lombok	west_lombok	1
EB373	EB379	east_lombok	west_lombok	1
EB374	EB377	east_lombok	west_lombok	1
EB374	EB378	east_lombok	west_lombok	0
EB374	EB379	east_lombok	west_lombok	1
EB375	EB377	east_lombok	west_lombok	1
EB375	EB378	east_lombok	west_lombok	0.0357143
EB375	EB379	east_lombok	west_lombok	1
EB376	EB377	east_lombok	west_lombok	1
EB376	EB378	east_lombok	west_lombok	0
EB376	EB379	east_lombok	west_lombok	1
EB388	EB386	north_lombok	north_lombok	1
EB389	EB386	north_lombok	north_lombok	1
EB389	EB388	north_lombok	north_lombok	1
EB390	EB386	north_lombok	north_lombok	1
EB390	EB388	north_lombok	north_lombok	0.142857
EB390	EB389	north_lombok	north_lombok	1
EB392	EB386	north_lombok	north_lombok	0.321429
EB392	EB388	north_lombok	north_lombok	1
EB392	EB389	north_lombok	north_lombok	1
EB392	EB390	north_lombok	north_lombok	1
EB394	EB386	north_lombok	north_lombok	1
EB394	EB388	north_lombok	north_lombok	1
EB394	EB389	north_lombok	north_lombok	1
EB394	EB390	north_lombok	north_lombok	1
EB394	EB392	north_lombok	north_lombok	1
EB395	EB386	north_lombok	north_lombok	1
EB395	EB388	north_lombok	north_lombok	0
EB395	EB389	north_lombok	north_lombok	1
EB395	EB390	north_lombok	north_lombok	0.142857
EB395	EB392	north_lombok	north_lombok	1
EB395	EB394	north_lombok	north_lombok	1
EB396	EB386	north_lombok	north_lombok	1
EB396	EB388	north_lombok	north_lombok	1
EB396	EB389	north_lombok	north_lombok	1
EB396	EB390	north_lombok	north_lombok	1
EB396	EB392	north_lombok	north_lombok	1
EB396	EB394	north_lombok	north_lombok	1
EB396	EB395	north_lombok	north_lombok	1
EB386	EB357	north_lombok	east_lombok	1
EB386	EB358	north_lombok	east_lombok	0.321429
EB386	EB362	north_lombok	east_lombok	1
EB386	EB364	north_lombok	east_lombok	0.535714
EB386	EB365	north_lombok	east_lombok	1
EB386	EB366	north_lombok	east_lombok	0.321429
EB386	EB367	north_lombok	east_lombok	1
EB386	EB369	north_lombok	east_lombok	1
EB386	EB372	north_lombok	east_lombok	1
EB386	EB373	north_lombok	east_lombok	1
EB386	EB374	north_lombok	east_lombok	1
EB386	EB375	north_lombok	east_lombok	1
EB386	EB376	north_lombok	east_lombok	1
EB388	EB357	north_lombok	east_lombok	0
EB388	EB358	north_lombok	east_lombok	1
EB388	EB362	north_lombok	east_lombok	0
EB388	EB364	north_lombok	east_lombok	1
EB388	EB365	north_lombok	east_lombok	0.464286
EB388	EB366	north_lombok	east_lombok	1
EB388	EB367	north_lombok	east_lombok	1
EB388	EB369	north_lombok	east_lombok	1
EB388	EB372	north_lombok	east_lombok	1
EB388	EB373	north_lombok	east_lombok	1
EB388	EB374	north_lombok	east_lombok	0
EB388	EB375	north_lombok	east_lombok	0.0357143
EB388	EB376	north_lombok	east_lombok	0
EB389	EB357	north_lombok	east_lombok	1
EB389	EB358	north_lombok	east_lombok	1
EB389	EB362	north_lombok	east_lombok	1
EB389	EB364	north_lombok	east_lombok	1
EB389	EB365	north_lombok	east_lombok	1
EB389	EB366	north_lombok	east_lombok	1
EB389	EB367	north_lombok	east_lombok	1
EB389	EB369	north_lombok	east_lombok	1
EB389	EB372	north_lombok	east_lombok	1
EB389	EB373	north_lombok	east_lombok	1
EB389	EB374	north_lombok	east_lombok	1
EB389	EB375	north_lombok	east_lombok	1
EB389	EB376	north_lombok	east_lombok	1
EB390	EB357	north_lombok	east_lombok	0.142857
EB390	EB358	north_lombok	east_lombok	1
EB390	EB362	north_lombok	east_lombok	0.142857
EB390	EB364	north_lombok	east_lombok	1
EB390	EB365	north_lombok	east_lombok	0.464286
EB390	EB366	north_lombok	east_lombok	1
EB390	EB367	north_lombok	east_lombok	1
EB390	EB369	north_lombok	east_lombok	1
EB390	EB372	north_lombok	east_lombok	1
EB390	EB373	north_lombok	east_lombok	1
EB390	EB374	north_lombok	east_lombok	0.142857
EB390	EB375	north_lombok	east_lombok	0.142857
EB390	EB376	north_lombok	east_lombok	0.142857
EB392	EB357	north_lombok	east_lombok	1
EB392	EB358	north_lombok	east_lombok	0
EB392	EB362	north_lombok	east_lombok	1
EB392	EB364	north_lombok	east_lombok	0.535714
EB392	EB365	north_lombok	east_lombok	1
EB392	EB366	north_lombok	east_lombok	0
EB392	EB367	north_lombok	east_lombok	1
EB392	EB369	north_lombok	east_lombok	1
EB392	EB372	north_lombok	east_lombok	1
EB392	EB373	north_lombok	east_lombok	1
EB392	EB374	north_lombok	east_lombok	1
EB392	EB375	north_lombok	east_lombok	1
EB392	EB376	north_lombok	east_lombok	1
EB394	EB357	north_lombok	east_lombok	1
EB394	EB358	north_lombok	east_lombok	1
EB394	EB362	north_lombok	east_lombok	1
EB394	EB364	north_lombok	east_lombok	0.892857
EB394	EB365	north_lombok	east_lombok	1
EB394	EB366	north_lombok	east_lombok	1
EB394	EB367	north_lombok	east_lombok	1
EB394	EB369	north_lombok	east_lombok	0.428571
EB394	EB372	north_lombok	east_lombok	1
EB394	EB373	north_lombok	east_lombok	1
EB394	EB374	north_lombok	east_lombok	1
EB394	EB375	north_lombok	east_lombok	0.964286
EB394	EB376	north_lombok	east_lombok	1
EB395	EB357	north_lombok	east_lombok	0
EB395	EB358	north_lombok	east_lombok	1
EB395	EB362	north_lombok	east_lombok	0
EB395	EB364	north_lombok	east_lombok	1
EB395	EB365	north_lombok	east_lombok	0.464286
EB395	EB366	north_lombok	east_lombok	1
EB395	EB367	north_lombok	east_lombok	1
EB395	EB369	north_lombok	east_lombok	1
EB395	EB372	north_lombok	east_lombok	1
EB395	EB373	north_lombok	east_lombok	1
EB395	EB374	north_lombok	east_lombok	0
EB395	EB375	north_lombok	east_lombok	0.0357143
EB395	EB376	north_lombok	east_lombok	0
EB396	EB357	north_lombok	east_lombok	1
EB396	EB358	north_lombok	east_lombok	1
EB396	EB362	north_lombok	east_lombok	1
EB396	EB364	north_lombok	east_lombok	1
EB396	EB365	north_lombok	east_lombok	1
EB396	EB366	north_lombok	east_lombok	1
EB396	EB367	north_lombok	east_lombok	1
EB396	EB369	north_lombok	east_lombok	1
EB396	EB372	north_lombok	east_lombok	1
EB396	EB373	north_lombok	east_lombok	1
EB396	EB374	north_lombok	east_lombok	1
EB396	EB375	north_lombok	east_lombok	1
EB396	EB376	north_lombok	east_lombok	1
EB386	EB377	north_lombok	west_lombok	1
EB386	EB378	north_lombok	west_lombok	1
EB386	EB379	north_lombok	west_lombok	1
EB388	EB377	north_lombok	west_lombok	1
EB388	EB378	north_lombok	west_lombok	0
EB388	EB379	north_lombok	west_lombok	1
EB389	EB377	north_lombok	west_lombok	1
EB389	EB378	north_lombok	west_lombok	1
EB389	EB379	north_lombok	west_lombok	1
EB390	EB377	north_lombok	west_lombok	1
EB390	EB378	north_lombok	west_lombok	0.142857
EB390	EB379	north_lombok	west_lombok	1
EB392	EB377	north_lombok	west_lombok	1
EB392	EB378	north_lombok	west_lombok	1
EB392	EB379	north_lombok	west_lombok	1
EB394	EB377	north_lombok	west_lombok	1
EB394	EB378	north_lombok	west_lombok	1
EB394	EB379	north_lombok	west_lombok	1
EB395	EB377	north_lombok	west_lombok	1
EB395	EB378	north_lombok	west_lombok	0
EB395	EB379	north_lombok	west_lombok	1
EB396	EB377	north_lombok	west_lombok	1
EB396	EB378	north_lombok	west_lombok	1
EB396	EB379	north_lombok	west_lombok	1
EB378	EB377	west_lombok	west_lombok	1
EB379	EB377	west_lombok	west_lombok	1
EB379	EB378	west_lombok	west_lombok	1
EB377	EB357	west_lombok	east_lombok	1
EB377	EB358	west_lombok	east_lombok	1
EB377	EB362	west_lombok	east_lombok	1
EB377	EB364	west_lombok	east_lombok	1
EB377	EB365	west_lombok	east_lombok	1
EB377	EB366	west_lombok	east_lombok	1
EB377	EB367	west_lombok	east_lombok	1
EB377	EB369	west_lombok	east_lombok	1
EB377	EB372	west_lombok	east_lombok	1
EB377	EB373	west_lombok	east_lombok	1
EB377	EB374	west_lombok	east_lombok	1
EB377	EB375	west_lombok	east_lombok	1
EB377	EB376	west_lombok	east_lombok	1
EB378	EB357	west_lombok	east_lombok	0
EB378	EB358	west_lombok	east_lombok	1
EB378	EB362	west_lombok	east_lombok	0
EB378	EB364	west_lombok	east_lombok	1
EB378	EB365	west_lombok	east_lombok	0.464286
EB378	EB366	west_lombok	east_lombok	1
EB378	EB367	west_lombok	east_lombok	1
EB378	EB369	west_lombok	east_lombok	1
EB378	EB372	west_lombok	east_lombok	1
EB378	EB373	west_lombok	east_lombok	1
EB378	EB374	west_lombok	east_lombok	0
EB378	EB375	west_lombok	east_lombok	0.0357143
EB378	EB376	west_lombok	east_lombok	0
EB379	EB357	west_lombok	east_lombok	1
EB379	EB358	west_lombok	east_lombok	1
EB379	EB362	west_lombok	east_lombok	1
EB379	EB364	west_lombok	east_lombok	1
EB379	EB365	west_lombok	east_lombok	1
EB379	EB366	west_lombok	east_lombok	1
EB379	EB367	west_lombok	east_lombok	1
EB379	EB369	west_lombok	east_lombok	1
EB379	EB372	west_lombok	east_lombok	1
EB379	EB373	west_lombok	east_lombok	1
EB379	EB374	west_lombok	east_lombok	1
EB379	EB375	west_lombok	east_lombok	1
EB379	EB376	west_lombok	east_lombok	1
EB377	EB386	west_lombok	north_lombok	1
EB377	EB388	west_lombok	north_lombok	1
EB377	EB389	west_lombok	north_lombok	1
EB377	EB390	west_lombok	north_lombok	1
EB377	EB392	west_lombok	north_lombok	1
EB377	EB394	west_lombok	north_lombok	1
EB377	EB395	west_lombok	north_lombok	1
EB377	EB396	west_lombok	north_lombok	1
EB378	EB386	west_lombok	north_lombok	1
EB378	EB388	west_lombok	north_lombok	0
EB378	EB389	west_lombok	north_lombok	1
EB378	EB390	west_lombok	north_lombok	0.142857
EB378	EB392	west_lombok	north_lombok	1
EB378	EB394	west_lombok	north_lombok	1
EB378	EB395	west_lombok	north_lombok	0
EB378	EB396	west_lombok	north_lombok	1
EB379	EB386	west_lombok	north_lombok	1
EB379	EB388	west_lombok	north_lombok	1
EB379	EB389	west_lombok	north_lombok	1
EB379	EB390	west_lombok	north_lombok	1
EB379	EB392	west_lombok	north_lombok	1
EB379	EB394	west_lombok	north_lombok	1
EB379	EB395	west_lombok	north_lombok	1
EB379	EB396	west_lombok	north_lombok	1

## Sheet: Symb. Beta Diversity Medium
Data of Bray-Curtis dissimiliarity (BC) of Symbiodiniaceae within and between medium groups in 24 samples
SubjectID1	SubjectID2	Group1	Group2	Distance
EB367	EB364	seawater	seawater	1
EB374	EB364	seawater	seawater	1
EB374	EB367	seawater	seawater	1
EB388	EB364	seawater	seawater	1
EB388	EB367	seawater	seawater	1
EB388	EB374	seawater	seawater	0
EB389	EB364	seawater	seawater	1
EB389	EB367	seawater	seawater	1
EB389	EB374	seawater	seawater	1
EB389	EB388	seawater	seawater	1
EB392	EB364	seawater	seawater	0.535714
EB392	EB367	seawater	seawater	1
EB392	EB374	seawater	seawater	1
EB392	EB388	seawater	seawater	1
EB392	EB389	seawater	seawater	1
EB396	EB364	seawater	seawater	1
EB396	EB367	seawater	seawater	1
EB396	EB374	seawater	seawater	1
EB396	EB388	seawater	seawater	1
EB396	EB389	seawater	seawater	1
EB396	EB392	seawater	seawater	1
EB364	EB357	seawater	sediment	1
EB364	EB358	seawater	sediment	0.535714
EB364	EB362	seawater	sediment	1
EB364	EB365	seawater	sediment	1
EB364	EB366	seawater	sediment	0.535714
EB364	EB369	seawater	sediment	0.892857
EB364	EB372	seawater	sediment	1
EB364	EB373	seawater	sediment	1
EB364	EB375	seawater	sediment	0.964286
EB364	EB376	seawater	sediment	1
EB364	EB377	seawater	sediment	1
EB364	EB378	seawater	sediment	1
EB364	EB379	seawater	sediment	1
EB364	EB386	seawater	sediment	0.535714
EB364	EB390	seawater	sediment	1
EB364	EB394	seawater	sediment	0.892857
EB364	EB395	seawater	sediment	1
EB367	EB357	seawater	sediment	1
EB367	EB358	seawater	sediment	1
EB367	EB362	seawater	sediment	1
EB367	EB365	seawater	sediment	1
EB367	EB366	seawater	sediment	1
EB367	EB369	seawater	sediment	1
EB367	EB372	seawater	sediment	1
EB367	EB373	seawater	sediment	1
EB367	EB375	seawater	sediment	1
EB367	EB376	seawater	sediment	1
EB367	EB377	seawater	sediment	1
EB367	EB378	seawater	sediment	1
EB367	EB379	seawater	sediment	1
EB367	EB386	seawater	sediment	1
EB367	EB390	seawater	sediment	1
EB367	EB394	seawater	sediment	1
EB367	EB395	seawater	sediment	1
EB374	EB357	seawater	sediment	0
EB374	EB358	seawater	sediment	1
EB374	EB362	seawater	sediment	0
EB374	EB365	seawater	sediment	0.464286
EB374	EB366	seawater	sediment	1
EB374	EB369	seawater	sediment	1
EB374	EB372	seawater	sediment	1
EB374	EB373	seawater	sediment	1
EB374	EB375	seawater	sediment	0.0357143
EB374	EB376	seawater	sediment	0
EB374	EB377	seawater	sediment	1
EB374	EB378	seawater	sediment	0
EB374	EB379	seawater	sediment	1
EB374	EB386	seawater	sediment	1
EB374	EB390	seawater	sediment	0.142857
EB374	EB394	seawater	sediment	1
EB374	EB395	seawater	sediment	0
EB388	EB357	seawater	sediment	0
EB388	EB358	seawater	sediment	1
EB388	EB362	seawater	sediment	0
EB388	EB365	seawater	sediment	0.464286
EB388	EB366	seawater	sediment	1
EB388	EB369	seawater	sediment	1
EB388	EB372	seawater	sediment	1
EB388	EB373	seawater	sediment	1
EB388	EB375	seawater	sediment	0.0357143
EB388	EB376	seawater	sediment	0
EB388	EB377	seawater	sediment	1
EB388	EB378	seawater	sediment	0
EB388	EB379	seawater	sediment	1
EB388	EB386	seawater	sediment	1
EB388	EB390	seawater	sediment	0.142857
EB388	EB394	seawater	sediment	1
EB388	EB395	seawater	sediment	0
EB389	EB357	seawater	sediment	1
EB389	EB358	seawater	sediment	1
EB389	EB362	seawater	sediment	1
EB389	EB365	seawater	sediment	1
EB389	EB366	seawater	sediment	1
EB389	EB369	seawater	sediment	1
EB389	EB372	seawater	sediment	1
EB389	EB373	seawater	sediment	1
EB389	EB375	seawater	sediment	1
EB389	EB376	seawater	sediment	1
EB389	EB377	seawater	sediment	1
EB389	EB378	seawater	sediment	1
EB389	EB379	seawater	sediment	1
EB389	EB386	seawater	sediment	1
EB389	EB390	seawater	sediment	1
EB389	EB394	seawater	sediment	1
EB389	EB395	seawater	sediment	1
EB392	EB357	seawater	sediment	1
EB392	EB358	seawater	sediment	0
EB392	EB362	seawater	sediment	1
EB392	EB365	seawater	sediment	1
EB392	EB366	seawater	sediment	0
EB392	EB369	seawater	sediment	1
EB392	EB372	seawater	sediment	1
EB392	EB373	seawater	sediment	1
EB392	EB375	seawater	sediment	1
EB392	EB376	seawater	sediment	1
EB392	EB377	seawater	sediment	1
EB392	EB378	seawater	sediment	1
EB392	EB379	seawater	sediment	1
EB392	EB386	seawater	sediment	0.321429
EB392	EB390	seawater	sediment	1
EB392	EB394	seawater	sediment	1
EB392	EB395	seawater	sediment	1
EB396	EB357	seawater	sediment	1
EB396	EB358	seawater	sediment	1
EB396	EB362	seawater	sediment	1
EB396	EB365	seawater	sediment	1
EB396	EB366	seawater	sediment	1
EB396	EB369	seawater	sediment	1
EB396	EB372	seawater	sediment	1
EB396	EB373	seawater	sediment	1
EB396	EB375	seawater	sediment	1
EB396	EB376	seawater	sediment	1
EB396	EB377	seawater	sediment	1
EB396	EB378	seawater	sediment	1
EB396	EB379	seawater	sediment	1
EB396	EB386	seawater	sediment	1
EB396	EB390	seawater	sediment	1
EB396	EB394	seawater	sediment	1
EB396	EB395	seawater	sediment	1
EB358	EB357	sediment	sediment	1
EB362	EB357	sediment	sediment	0
EB362	EB358	sediment	sediment	1
EB365	EB357	sediment	sediment	0.464286
EB365	EB358	sediment	sediment	1
EB365	EB362	sediment	sediment	0.464286
EB366	EB357	sediment	sediment	1
EB366	EB358	sediment	sediment	0
EB366	EB362	sediment	sediment	1
EB366	EB365	sediment	sediment	1
EB369	EB357	sediment	sediment	1
EB369	EB358	sediment	sediment	1
EB369	EB362	sediment	sediment	1
EB369	EB365	sediment	sediment	1
EB369	EB366	sediment	sediment	1
EB372	EB357	sediment	sediment	1
EB372	EB358	sediment	sediment	1
EB372	EB362	sediment	sediment	1
EB372	EB365	sediment	sediment	1
EB372	EB366	sediment	sediment	1
EB372	EB369	sediment	sediment	1
EB373	EB357	sediment	sediment	1
EB373	EB358	sediment	sediment	1
EB373	EB362	sediment	sediment	1
EB373	EB365	sediment	sediment	1
EB373	EB366	sediment	sediment	1
EB373	EB369	sediment	sediment	1
EB373	EB372	sediment	sediment	1
EB375	EB357	sediment	sediment	0.0357143
EB375	EB358	sediment	sediment	1
EB375	EB362	sediment	sediment	0.0357143
EB375	EB365	sediment	sediment	0.464286
EB375	EB366	sediment	sediment	1
EB375	EB369	sediment	sediment	0.964286
EB375	EB372	sediment	sediment	1
EB375	EB373	sediment	sediment	1
EB376	EB357	sediment	sediment	0
EB376	EB358	sediment	sediment	1
EB376	EB362	sediment	sediment	0
EB376	EB365	sediment	sediment	0.464286
EB376	EB366	sediment	sediment	1
EB376	EB369	sediment	sediment	1
EB376	EB372	sediment	sediment	1
EB376	EB373	sediment	sediment	1
EB376	EB375	sediment	sediment	0.0357143
EB377	EB357	sediment	sediment	1
EB377	EB358	sediment	sediment	1
EB377	EB362	sediment	sediment	1
EB377	EB365	sediment	sediment	1
EB377	EB366	sediment	sediment	1
EB377	EB369	sediment	sediment	1
EB377	EB372	sediment	sediment	1
EB377	EB373	sediment	sediment	1
EB377	EB375	sediment	sediment	1
EB377	EB376	sediment	sediment	1
EB378	EB357	sediment	sediment	0
EB378	EB358	sediment	sediment	1
EB378	EB362	sediment	sediment	0
EB378	EB365	sediment	sediment	0.464286
EB378	EB366	sediment	sediment	1
EB378	EB369	sediment	sediment	1
EB378	EB372	sediment	sediment	1
EB378	EB373	sediment	sediment	1
EB378	EB375	sediment	sediment	0.0357143
EB378	EB376	sediment	sediment	0
EB378	EB377	sediment	sediment	1
EB379	EB357	sediment	sediment	1
EB379	EB358	sediment	sediment	1
EB379	EB362	sediment	sediment	1
EB379	EB365	sediment	sediment	1
EB379	EB366	sediment	sediment	1
EB379	EB369	sediment	sediment	1
EB379	EB372	sediment	sediment	1
EB379	EB373	sediment	sediment	1
EB379	EB375	sediment	sediment	1
EB379	EB376	sediment	sediment	1
EB379	EB377	sediment	sediment	1
EB379	EB378	sediment	sediment	1
EB386	EB357	sediment	sediment	1
EB386	EB358	sediment	sediment	0.321429
EB386	EB362	sediment	sediment	1
EB386	EB365	sediment	sediment	1
EB386	EB366	sediment	sediment	0.321429
EB386	EB369	sediment	sediment	1
EB386	EB372	sediment	sediment	1
EB386	EB373	sediment	sediment	1
EB386	EB375	sediment	sediment	1
EB386	EB376	sediment	sediment	1
EB386	EB377	sediment	sediment	1
EB386	EB378	sediment	sediment	1
EB386	EB379	sediment	sediment	1
EB390	EB357	sediment	sediment	0.142857
EB390	EB358	sediment	sediment	1
EB390	EB362	sediment	sediment	0.142857
EB390	EB365	sediment	sediment	0.464286
EB390	EB366	sediment	sediment	1
EB390	EB369	sediment	sediment	1
EB390	EB372	sediment	sediment	1
EB390	EB373	sediment	sediment	1
EB390	EB375	sediment	sediment	0.142857
EB390	EB376	sediment	sediment	0.142857
EB390	EB377	sediment	sediment	1
EB390	EB378	sediment	sediment	0.142857
EB390	EB379	sediment	sediment	1
EB390	EB386	sediment	sediment	1
EB394	EB357	sediment	sediment	1
EB394	EB358	sediment	sediment	1
EB394	EB362	sediment	sediment	1
EB394	EB365	sediment	sediment	1
EB394	EB366	sediment	sediment	1
EB394	EB369	sediment	sediment	0.428571
EB394	EB372	sediment	sediment	1
EB394	EB373	sediment	sediment	1
EB394	EB375	sediment	sediment	0.964286
EB394	EB376	sediment	sediment	1
EB394	EB377	sediment	sediment	1
EB394	EB378	sediment	sediment	1
EB394	EB379	sediment	sediment	1
EB394	EB386	sediment	sediment	1
EB394	EB390	sediment	sediment	1
EB395	EB357	sediment	sediment	0
EB395	EB358	sediment	sediment	1
EB395	EB362	sediment	sediment	0
EB395	EB365	sediment	sediment	0.464286
EB395	EB366	sediment	sediment	1
EB395	EB369	sediment	sediment	1
EB395	EB372	sediment	sediment	1
EB395	EB373	sediment	sediment	1
EB395	EB375	sediment	sediment	0.0357143
EB395	EB376	sediment	sediment	0
EB395	EB377	sediment	sediment	1
EB395	EB378	sediment	sediment	0
EB395	EB379	sediment	sediment	1
EB395	EB386	sediment	sediment	1
EB395	EB390	sediment	sediment	0.142857
EB395	EB394	sediment	sediment	1
EB357	EB364	sediment	seawater	1
EB357	EB367	sediment	seawater	1
EB357	EB374	sediment	seawater	0
EB357	EB388	sediment	seawater	0
EB357	EB389	sediment	seawater	1
EB357	EB392	sediment	seawater	1
EB357	EB396	sediment	seawater	1
EB358	EB364	sediment	seawater	0.535714
EB358	EB367	sediment	seawater	1
EB358	EB374	sediment	seawater	1
EB358	EB388	sediment	seawater	1
EB358	EB389	sediment	seawater	1
EB358	EB392	sediment	seawater	0
EB358	EB396	sediment	seawater	1
EB362	EB364	sediment	seawater	1
EB362	EB367	sediment	seawater	1
EB362	EB374	sediment	seawater	0
EB362	EB388	sediment	seawater	0
EB362	EB389	sediment	seawater	1
EB362	EB392	sediment	seawater	1
EB362	EB396	sediment	seawater	1
EB365	EB364	sediment	seawater	1
EB365	EB367	sediment	seawater	1
EB365	EB374	sediment	seawater	0.464286
EB365	EB388	sediment	seawater	0.464286
EB365	EB389	sediment	seawater	1
EB365	EB392	sediment	seawater	1
EB365	EB396	sediment	seawater	1
EB366	EB364	sediment	seawater	0.535714
EB366	EB367	sediment	seawater	1
EB366	EB374	sediment	seawater	1
EB366	EB388	sediment	seawater	1
EB366	EB389	sediment	seawater	1
EB366	EB392	sediment	seawater	0
EB366	EB396	sediment	seawater	1
EB369	EB364	sediment	seawater	0.892857
EB369	EB367	sediment	seawater	1
EB369	EB374	sediment	seawater	1
EB369	EB388	sediment	seawater	1
EB369	EB389	sediment	seawater	1
EB369	EB392	sediment	seawater	1
EB369	EB396	sediment	seawater	1
EB372	EB364	sediment	seawater	1
EB372	EB367	sediment	seawater	1
EB372	EB374	sediment	seawater	1
EB372	EB388	sediment	seawater	1
EB372	EB389	sediment	seawater	1
EB372	EB392	sediment	seawater	1
EB372	EB396	sediment	seawater	1
EB373	EB364	sediment	seawater	1
EB373	EB367	sediment	seawater	1
EB373	EB374	sediment	seawater	1
EB373	EB388	sediment	seawater	1
EB373	EB389	sediment	seawater	1
EB373	EB392	sediment	seawater	1
EB373	EB396	sediment	seawater	1
EB375	EB364	sediment	seawater	0.964286
EB375	EB367	sediment	seawater	1
EB375	EB374	sediment	seawater	0.0357143
EB375	EB388	sediment	seawater	0.0357143
EB375	EB389	sediment	seawater	1
EB375	EB392	sediment	seawater	1
EB375	EB396	sediment	seawater	1
EB376	EB364	sediment	seawater	1
EB376	EB367	sediment	seawater	1
EB376	EB374	sediment	seawater	0
EB376	EB388	sediment	seawater	0
EB376	EB389	sediment	seawater	1
EB376	EB392	sediment	seawater	1
EB376	EB396	sediment	seawater	1
EB377	EB364	sediment	seawater	1
EB377	EB367	sediment	seawater	1
EB377	EB374	sediment	seawater	1
EB377	EB388	sediment	seawater	1
EB377	EB389	sediment	seawater	1
EB377	EB392	sediment	seawater	1
EB377	EB396	sediment	seawater	1
EB378	EB364	sediment	seawater	1
EB378	EB367	sediment	seawater	1
EB378	EB374	sediment	seawater	0
EB378	EB388	sediment	seawater	0
EB378	EB389	sediment	seawater	1
EB378	EB392	sediment	seawater	1
EB378	EB396	sediment	seawater	1
EB379	EB364	sediment	seawater	1
EB379	EB367	sediment	seawater	1
EB379	EB374	sediment	seawater	1
EB379	EB388	sediment	seawater	1
EB379	EB389	sediment	seawater	1
EB379	EB392	sediment	seawater	1
EB379	EB396	sediment	seawater	1
EB386	EB364	sediment	seawater	0.535714
EB386	EB367	sediment	seawater	1
EB386	EB374	sediment	seawater	1
EB386	EB388	sediment	seawater	1
EB386	EB389	sediment	seawater	1
EB386	EB392	sediment	seawater	0.321429
EB386	EB396	sediment	seawater	1
EB390	EB364	sediment	seawater	1
EB390	EB367	sediment	seawater	1
EB390	EB374	sediment	seawater	0.142857
EB390	EB388	sediment	seawater	0.142857
EB390	EB389	sediment	seawater	1
EB390	EB392	sediment	seawater	1
EB390	EB396	sediment	seawater	1
EB394	EB364	sediment	seawater	0.892857
EB394	EB367	sediment	seawater	1
EB394	EB374	sediment	seawater	1
EB394	EB388	sediment	seawater	1
EB394	EB389	sediment	seawater	1
EB394	EB392	sediment	seawater	1
EB394	EB396	sediment	seawater	1
EB395	EB364	sediment	seawater	1
EB395	EB367	sediment	seawater	1
EB395	EB374	sediment	seawater	0
EB395	EB388	sediment	seawater	0
EB395	EB389	sediment	seawater	1
EB395	EB392	sediment	seawater	1
EB395	EB396	sediment	seawater	1

## Sheet: Symb. Beta Diversity Fraction
Data of Bray-Curtis dissimiliarity (BC) of Symbiodiniaceae within and between pore-size fraction groups in 24 samples
SubjectID1	SubjectID2	Group1	Group2	Distance
EB365	EB357	0.4-12µm	0.4-12µm	0.464286
EB367	EB357	0.4-12µm	0.4-12µm	1
EB367	EB365	0.4-12µm	0.4-12µm	1
EB369	EB357	0.4-12µm	0.4-12µm	1
EB369	EB365	0.4-12µm	0.4-12µm	1
EB369	EB367	0.4-12µm	0.4-12µm	1
EB372	EB357	0.4-12µm	0.4-12µm	1
EB372	EB365	0.4-12µm	0.4-12µm	1
EB372	EB367	0.4-12µm	0.4-12µm	1
EB372	EB369	0.4-12µm	0.4-12µm	1
EB374	EB357	0.4-12µm	0.4-12µm	0
EB374	EB365	0.4-12µm	0.4-12µm	0.464286
EB374	EB367	0.4-12µm	0.4-12µm	1
EB374	EB369	0.4-12µm	0.4-12µm	1
EB374	EB372	0.4-12µm	0.4-12µm	1
EB375	EB357	0.4-12µm	0.4-12µm	0.0357143
EB375	EB365	0.4-12µm	0.4-12µm	0.464286
EB375	EB367	0.4-12µm	0.4-12µm	1
EB375	EB369	0.4-12µm	0.4-12µm	0.964286
EB375	EB372	0.4-12µm	0.4-12µm	1
EB375	EB374	0.4-12µm	0.4-12µm	0.0357143
EB377	EB357	0.4-12µm	0.4-12µm	1
EB377	EB365	0.4-12µm	0.4-12µm	1
EB377	EB367	0.4-12µm	0.4-12µm	1
EB377	EB369	0.4-12µm	0.4-12µm	1
EB377	EB372	0.4-12µm	0.4-12µm	1
EB377	EB374	0.4-12µm	0.4-12µm	1
EB377	EB375	0.4-12µm	0.4-12µm	1
EB378	EB357	0.4-12µm	0.4-12µm	0
EB378	EB365	0.4-12µm	0.4-12µm	0.464286
EB378	EB367	0.4-12µm	0.4-12µm	1
EB378	EB369	0.4-12µm	0.4-12µm	1
EB378	EB372	0.4-12µm	0.4-12µm	1
EB378	EB374	0.4-12µm	0.4-12µm	0
EB378	EB375	0.4-12µm	0.4-12µm	0.0357143
EB378	EB377	0.4-12µm	0.4-12µm	1
EB379	EB357	0.4-12µm	0.4-12µm	1
EB379	EB365	0.4-12µm	0.4-12µm	1
EB379	EB367	0.4-12µm	0.4-12µm	1
EB379	EB369	0.4-12µm	0.4-12µm	1
EB379	EB372	0.4-12µm	0.4-12µm	1
EB379	EB374	0.4-12µm	0.4-12µm	1
EB379	EB375	0.4-12µm	0.4-12µm	1
EB379	EB377	0.4-12µm	0.4-12µm	1
EB379	EB378	0.4-12µm	0.4-12µm	1
EB386	EB357	0.4-12µm	0.4-12µm	1
EB386	EB365	0.4-12µm	0.4-12µm	1
EB386	EB367	0.4-12µm	0.4-12µm	1
EB386	EB369	0.4-12µm	0.4-12µm	1
EB386	EB372	0.4-12µm	0.4-12µm	1
EB386	EB374	0.4-12µm	0.4-12µm	1
EB386	EB375	0.4-12µm	0.4-12µm	1
EB386	EB377	0.4-12µm	0.4-12µm	1
EB386	EB378	0.4-12µm	0.4-12µm	1
EB386	EB379	0.4-12µm	0.4-12µm	1
EB388	EB357	0.4-12µm	0.4-12µm	0
EB388	EB365	0.4-12µm	0.4-12µm	0.464286
EB388	EB367	0.4-12µm	0.4-12µm	1
EB388	EB369	0.4-12µm	0.4-12µm	1
EB388	EB372	0.4-12µm	0.4-12µm	1
EB388	EB374	0.4-12µm	0.4-12µm	0
EB388	EB375	0.4-12µm	0.4-12µm	0.0357143
EB388	EB377	0.4-12µm	0.4-12µm	1
EB388	EB378	0.4-12µm	0.4-12µm	0
EB388	EB379	0.4-12µm	0.4-12µm	1
EB388	EB386	0.4-12µm	0.4-12µm	1
EB390	EB357	0.4-12µm	0.4-12µm	0.142857
EB390	EB365	0.4-12µm	0.4-12µm	0.464286
EB390	EB367	0.4-12µm	0.4-12µm	1
EB390	EB369	0.4-12µm	0.4-12µm	1
EB390	EB372	0.4-12µm	0.4-12µm	1
EB390	EB374	0.4-12µm	0.4-12µm	0.142857
EB390	EB375	0.4-12µm	0.4-12µm	0.142857
EB390	EB377	0.4-12µm	0.4-12µm	1
EB390	EB378	0.4-12µm	0.4-12µm	0.142857
EB390	EB379	0.4-12µm	0.4-12µm	1
EB390	EB386	0.4-12µm	0.4-12µm	1
EB390	EB388	0.4-12µm	0.4-12µm	0.142857
EB392	EB357	0.4-12µm	0.4-12µm	1
EB392	EB365	0.4-12µm	0.4-12µm	1
EB392	EB367	0.4-12µm	0.4-12µm	1
EB392	EB369	0.4-12µm	0.4-12µm	1
EB392	EB372	0.4-12µm	0.4-12µm	1
EB392	EB374	0.4-12µm	0.4-12µm	1
EB392	EB375	0.4-12µm	0.4-12µm	1
EB392	EB377	0.4-12µm	0.4-12µm	1
EB392	EB378	0.4-12µm	0.4-12µm	1
EB392	EB379	0.4-12µm	0.4-12µm	1
EB392	EB386	0.4-12µm	0.4-12µm	0.321429
EB392	EB388	0.4-12µm	0.4-12µm	1
EB392	EB390	0.4-12µm	0.4-12µm	1
EB394	EB357	0.4-12µm	0.4-12µm	1
EB394	EB365	0.4-12µm	0.4-12µm	1
EB394	EB367	0.4-12µm	0.4-12µm	1
EB394	EB369	0.4-12µm	0.4-12µm	0.428571
EB394	EB372	0.4-12µm	0.4-12µm	1
EB394	EB374	0.4-12µm	0.4-12µm	1
EB394	EB375	0.4-12µm	0.4-12µm	0.964286
EB394	EB377	0.4-12µm	0.4-12µm	1
EB394	EB378	0.4-12µm	0.4-12µm	1
EB394	EB379	0.4-12µm	0.4-12µm	1
EB394	EB386	0.4-12µm	0.4-12µm	1
EB394	EB388	0.4-12µm	0.4-12µm	1
EB394	EB390	0.4-12µm	0.4-12µm	1
EB394	EB392	0.4-12µm	0.4-12µm	1
EB396	EB357	0.4-12µm	0.4-12µm	1
EB396	EB365	0.4-12µm	0.4-12µm	1
EB396	EB367	0.4-12µm	0.4-12µm	1
EB396	EB369	0.4-12µm	0.4-12µm	1
EB396	EB372	0.4-12µm	0.4-12µm	1
EB396	EB374	0.4-12µm	0.4-12µm	1
EB396	EB375	0.4-12µm	0.4-12µm	1
EB396	EB377	0.4-12µm	0.4-12µm	1
EB396	EB378	0.4-12µm	0.4-12µm	1
EB396	EB379	0.4-12µm	0.4-12µm	1
EB396	EB386	0.4-12µm	0.4-12µm	1
EB396	EB388	0.4-12µm	0.4-12µm	1
EB396	EB390	0.4-12µm	0.4-12µm	1
EB396	EB392	0.4-12µm	0.4-12µm	1
EB396	EB394	0.4-12µm	0.4-12µm	1
EB357	EB358	0.4-12µm	>12µm	1
EB357	EB362	0.4-12µm	>12µm	0
EB357	EB364	0.4-12µm	>12µm	1
EB357	EB366	0.4-12µm	>12µm	1
EB357	EB373	0.4-12µm	>12µm	1
EB357	EB376	0.4-12µm	>12µm	0
EB357	EB389	0.4-12µm	>12µm	1
EB357	EB395	0.4-12µm	>12µm	0
EB365	EB358	0.4-12µm	>12µm	1
EB365	EB362	0.4-12µm	>12µm	0.464286
EB365	EB364	0.4-12µm	>12µm	1
EB365	EB366	0.4-12µm	>12µm	1
EB365	EB373	0.4-12µm	>12µm	1
EB365	EB376	0.4-12µm	>12µm	0.464286
EB365	EB389	0.4-12µm	>12µm	1
EB365	EB395	0.4-12µm	>12µm	0.464286
EB367	EB358	0.4-12µm	>12µm	1
EB367	EB362	0.4-12µm	>12µm	1
EB367	EB364	0.4-12µm	>12µm	1
EB367	EB366	0.4-12µm	>12µm	1
EB367	EB373	0.4-12µm	>12µm	1
EB367	EB376	0.4-12µm	>12µm	1
EB367	EB389	0.4-12µm	>12µm	1
EB367	EB395	0.4-12µm	>12µm	1
EB369	EB358	0.4-12µm	>12µm	1
EB369	EB362	0.4-12µm	>12µm	1
EB369	EB364	0.4-12µm	>12µm	0.892857
EB369	EB366	0.4-12µm	>12µm	1
EB369	EB373	0.4-12µm	>12µm	1
EB369	EB376	0.4-12µm	>12µm	1
EB369	EB389	0.4-12µm	>12µm	1
EB369	EB395	0.4-12µm	>12µm	1
EB372	EB358	0.4-12µm	>12µm	1
EB372	EB362	0.4-12µm	>12µm	1
EB372	EB364	0.4-12µm	>12µm	1
EB372	EB366	0.4-12µm	>12µm	1
EB372	EB373	0.4-12µm	>12µm	1
EB372	EB376	0.4-12µm	>12µm	1
EB372	EB389	0.4-12µm	>12µm	1
EB372	EB395	0.4-12µm	>12µm	1
EB374	EB358	0.4-12µm	>12µm	1
EB374	EB362	0.4-12µm	>12µm	0
EB374	EB364	0.4-12µm	>12µm	1
EB374	EB366	0.4-12µm	>12µm	1
EB374	EB373	0.4-12µm	>12µm	1
EB374	EB376	0.4-12µm	>12µm	0
EB374	EB389	0.4-12µm	>12µm	1
EB374	EB395	0.4-12µm	>12µm	0
EB375	EB358	0.4-12µm	>12µm	1
EB375	EB362	0.4-12µm	>12µm	0.0357143
EB375	EB364	0.4-12µm	>12µm	0.964286
EB375	EB366	0.4-12µm	>12µm	1
EB375	EB373	0.4-12µm	>12µm	1
EB375	EB376	0.4-12µm	>12µm	0.0357143
EB375	EB389	0.4-12µm	>12µm	1
EB375	EB395	0.4-12µm	>12µm	0.0357143
EB377	EB358	0.4-12µm	>12µm	1
EB377	EB362	0.4-12µm	>12µm	1
EB377	EB364	0.4-12µm	>12µm	1
EB377	EB366	0.4-12µm	>12µm	1
EB377	EB373	0.4-12µm	>12µm	1
EB377	EB376	0.4-12µm	>12µm	1
EB377	EB389	0.4-12µm	>12µm	1
EB377	EB395	0.4-12µm	>12µm	1
EB378	EB358	0.4-12µm	>12µm	1
EB378	EB362	0.4-12µm	>12µm	0
EB378	EB364	0.4-12µm	>12µm	1
EB378	EB366	0.4-12µm	>12µm	1
EB378	EB373	0.4-12µm	>12µm	1
EB378	EB376	0.4-12µm	>12µm	0
EB378	EB389	0.4-12µm	>12µm	1
EB378	EB395	0.4-12µm	>12µm	0
EB379	EB358	0.4-12µm	>12µm	1
EB379	EB362	0.4-12µm	>12µm	1
EB379	EB364	0.4-12µm	>12µm	1
EB379	EB366	0.4-12µm	>12µm	1
EB379	EB373	0.4-12µm	>12µm	1
EB379	EB376	0.4-12µm	>12µm	1
EB379	EB389	0.4-12µm	>12µm	1
EB379	EB395	0.4-12µm	>12µm	1
EB386	EB358	0.4-12µm	>12µm	0.321429
EB386	EB362	0.4-12µm	>12µm	1
EB386	EB364	0.4-12µm	>12µm	0.535714
EB386	EB366	0.4-12µm	>12µm	0.321429
EB386	EB373	0.4-12µm	>12µm	1
EB386	EB376	0.4-12µm	>12µm	1
EB386	EB389	0.4-12µm	>12µm	1
EB386	EB395	0.4-12µm	>12µm	1
EB388	EB358	0.4-12µm	>12µm	1
EB388	EB362	0.4-12µm	>12µm	0
EB388	EB364	0.4-12µm	>12µm	1
EB388	EB366	0.4-12µm	>12µm	1
EB388	EB373	0.4-12µm	>12µm	1
EB388	EB376	0.4-12µm	>12µm	0
EB388	EB389	0.4-12µm	>12µm	1
EB388	EB395	0.4-12µm	>12µm	0
EB390	EB358	0.4-12µm	>12µm	1
EB390	EB362	0.4-12µm	>12µm	0.142857
EB390	EB364	0.4-12µm	>12µm	1
EB390	EB366	0.4-12µm	>12µm	1
EB390	EB373	0.4-12µm	>12µm	1
EB390	EB376	0.4-12µm	>12µm	0.142857
EB390	EB389	0.4-12µm	>12µm	1
EB390	EB395	0.4-12µm	>12µm	0.142857
EB392	EB358	0.4-12µm	>12µm	0
EB392	EB362	0.4-12µm	>12µm	1
EB392	EB364	0.4-12µm	>12µm	0.535714
EB392	EB366	0.4-12µm	>12µm	0
EB392	EB373	0.4-12µm	>12µm	1
EB392	EB376	0.4-12µm	>12µm	1
EB392	EB389	0.4-12µm	>12µm	1
EB392	EB395	0.4-12µm	>12µm	1
EB394	EB358	0.4-12µm	>12µm	1
EB394	EB362	0.4-12µm	>12µm	1
EB394	EB364	0.4-12µm	>12µm	0.892857
EB394	EB366	0.4-12µm	>12µm	1
EB394	EB373	0.4-12µm	>12µm	1
EB394	EB376	0.4-12µm	>12µm	1
EB394	EB389	0.4-12µm	>12µm	1
EB394	EB395	0.4-12µm	>12µm	1
EB396	EB358	0.4-12µm	>12µm	1
EB396	EB362	0.4-12µm	>12µm	1
EB396	EB364	0.4-12µm	>12µm	1
EB396	EB366	0.4-12µm	>12µm	1
EB396	EB373	0.4-12µm	>12µm	1
EB396	EB376	0.4-12µm	>12µm	1
EB396	EB389	0.4-12µm	>12µm	1
EB396	EB395	0.4-12µm	>12µm	1
EB362	EB358	>12µm	>12µm	1
EB364	EB358	>12µm	>12µm	0.535714
EB364	EB362	>12µm	>12µm	1
EB366	EB358	>12µm	>12µm	0
EB366	EB362	>12µm	>12µm	1
EB366	EB364	>12µm	>12µm	0.535714
EB373	EB358	>12µm	>12µm	1
EB373	EB362	>12µm	>12µm	1
EB373	EB364	>12µm	>12µm	1
EB373	EB366	>12µm	>12µm	1
EB376	EB358	>12µm	>12µm	1
EB376	EB362	>12µm	>12µm	0
EB376	EB364	>12µm	>12µm	1
EB376	EB366	>12µm	>12µm	1
EB376	EB373	>12µm	>12µm	1
EB389	EB358	>12µm	>12µm	1
EB389	EB362	>12µm	>12µm	1
EB389	EB364	>12µm	>12µm	1
EB389	EB366	>12µm	>12µm	1
EB389	EB373	>12µm	>12µm	1
EB389	EB376	>12µm	>12µm	1
EB395	EB358	>12µm	>12µm	1
EB395	EB362	>12µm	>12µm	0
EB395	EB364	>12µm	>12µm	1
EB395	EB366	>12µm	>12µm	1
EB395	EB373	>12µm	>12µm	1
EB395	EB376	>12µm	>12µm	0
EB395	EB389	>12µm	>12µm	1
EB358	EB357	>12µm	0.4-12µm	1
EB358	EB365	>12µm	0.4-12µm	1
EB358	EB367	>12µm	0.4-12µm	1
EB358	EB369	>12µm	0.4-12µm	1
EB358	EB372	>12µm	0.4-12µm	1
EB358	EB374	>12µm	0.4-12µm	1
EB358	EB375	>12µm	0.4-12µm	1
EB358	EB377	>12µm	0.4-12µm	1
EB358	EB378	>12µm	0.4-12µm	1
EB358	EB379	>12µm	0.4-12µm	1
EB358	EB386	>12µm	0.4-12µm	0.321429
EB358	EB388	>12µm	0.4-12µm	1
EB358	EB390	>12µm	0.4-12µm	1
EB358	EB392	>12µm	0.4-12µm	0
EB358	EB394	>12µm	0.4-12µm	1
EB358	EB396	>12µm	0.4-12µm	1
EB362	EB357	>12µm	0.4-12µm	0
EB362	EB365	>12µm	0.4-12µm	0.464286
EB362	EB367	>12µm	0.4-12µm	1
EB362	EB369	>12µm	0.4-12µm	1
EB362	EB372	>12µm	0.4-12µm	1
EB362	EB374	>12µm	0.4-12µm	0
EB362	EB375	>12µm	0.4-12µm	0.0357143
EB362	EB377	>12µm	0.4-12µm	1
EB362	EB378	>12µm	0.4-12µm	0
EB362	EB379	>12µm	0.4-12µm	1
EB362	EB386	>12µm	0.4-12µm	1
EB362	EB388	>12µm	0.4-12µm	0
EB362	EB390	>12µm	0.4-12µm	0.142857
EB362	EB392	>12µm	0.4-12µm	1
EB362	EB394	>12µm	0.4-12µm	1
EB362	EB396	>12µm	0.4-12µm	1
EB364	EB357	>12µm	0.4-12µm	1
EB364	EB365	>12µm	0.4-12µm	1
EB364	EB367	>12µm	0.4-12µm	1
EB364	EB369	>12µm	0.4-12µm	0.892857
EB364	EB372	>12µm	0.4-12µm	1
EB364	EB374	>12µm	0.4-12µm	1
EB364	EB375	>12µm	0.4-12µm	0.964286
EB364	EB377	>12µm	0.4-12µm	1
EB364	EB378	>12µm	0.4-12µm	1
EB364	EB379	>12µm	0.4-12µm	1
EB364	EB386	>12µm	0.4-12µm	0.535714
EB364	EB388	>12µm	0.4-12µm	1
EB364	EB390	>12µm	0.4-12µm	1
EB364	EB392	>12µm	0.4-12µm	0.535714
EB364	EB394	>12µm	0.4-12µm	0.892857
EB364	EB396	>12µm	0.4-12µm	1
EB366	EB357	>12µm	0.4-12µm	1
EB366	EB365	>12µm	0.4-12µm	1
EB366	EB367	>12µm	0.4-12µm	1
EB366	EB369	>12µm	0.4-12µm	1
EB366	EB372	>12µm	0.4-12µm	1
EB366	EB374	>12µm	0.4-12µm	1
EB366	EB375	>12µm	0.4-12µm	1
EB366	EB377	>12µm	0.4-12µm	1
EB366	EB378	>12µm	0.4-12µm	1
EB366	EB379	>12µm	0.4-12µm	1
EB366	EB386	>12µm	0.4-12µm	0.321429
EB366	EB388	>12µm	0.4-12µm	1
EB366	EB390	>12µm	0.4-12µm	1
EB366	EB392	>12µm	0.4-12µm	0
EB366	EB394	>12µm	0.4-12µm	1
EB366	EB396	>12µm	0.4-12µm	1
EB373	EB357	>12µm	0.4-12µm	1
EB373	EB365	>12µm	0.4-12µm	1
EB373	EB367	>12µm	0.4-12µm	1
EB373	EB369	>12µm	0.4-12µm	1
EB373	EB372	>12µm	0.4-12µm	1
EB373	EB374	>12µm	0.4-12µm	1
EB373	EB375	>12µm	0.4-12µm	1
EB373	EB377	>12µm	0.4-12µm	1
EB373	EB378	>12µm	0.4-12µm	1
EB373	EB379	>12µm	0.4-12µm	1
EB373	EB386	>12µm	0.4-12µm	1
EB373	EB388	>12µm	0.4-12µm	1
EB373	EB390	>12µm	0.4-12µm	1
EB373	EB392	>12µm	0.4-12µm	1
EB373	EB394	>12µm	0.4-12µm	1
EB373	EB396	>12µm	0.4-12µm	1
EB376	EB357	>12µm	0.4-12µm	0
EB376	EB365	>12µm	0.4-12µm	0.464286
EB376	EB367	>12µm	0.4-12µm	1
EB376	EB369	>12µm	0.4-12µm	1
EB376	EB372	>12µm	0.4-12µm	1
EB376	EB374	>12µm	0.4-12µm	0
EB376	EB375	>12µm	0.4-12µm	0.0357143
EB376	EB377	>12µm	0.4-12µm	1
EB376	EB378	>12µm	0.4-12µm	0
EB376	EB379	>12µm	0.4-12µm	1
EB376	EB386	>12µm	0.4-12µm	1
EB376	EB388	>12µm	0.4-12µm	0
EB376	EB390	>12µm	0.4-12µm	0.142857
EB376	EB392	>12µm	0.4-12µm	1
EB376	EB394	>12µm	0.4-12µm	1
EB376	EB396	>12µm	0.4-12µm	1
EB389	EB357	>12µm	0.4-12µm	1
EB389	EB365	>12µm	0.4-12µm	1
EB389	EB367	>12µm	0.4-12µm	1
EB389	EB369	>12µm	0.4-12µm	1
EB389	EB372	>12µm	0.4-12µm	1
EB389	EB374	>12µm	0.4-12µm	1
EB389	EB375	>12µm	0.4-12µm	1
EB389	EB377	>12µm	0.4-12µm	1
EB389	EB378	>12µm	0.4-12µm	1
EB389	EB379	>12µm	0.4-12µm	1
EB389	EB386	>12µm	0.4-12µm	1
EB389	EB388	>12µm	0.4-12µm	1
EB389	EB390	>12µm	0.4-12µm	1
EB389	EB392	>12µm	0.4-12µm	1
EB389	EB394	>12µm	0.4-12µm	1
EB389	EB396	>12µm	0.4-12µm	1
EB395	EB357	>12µm	0.4-12µm	0
EB395	EB365	>12µm	0.4-12µm	0.464286
EB395	EB367	>12µm	0.4-12µm	1
EB395	EB369	>12µm	0.4-12µm	1
EB395	EB372	>12µm	0.4-12µm	1
EB395	EB374	>12µm	0.4-12µm	0
EB395	EB375	>12µm	0.4-12µm	0.0357143
EB395	EB377	>12µm	0.4-12µm	1
EB395	EB378	>12µm	0.4-12µm	0
EB395	EB379	>12µm	0.4-12µm	1
EB395	EB386	>12µm	0.4-12µm	1
EB395	EB388	>12µm	0.4-12µm	0
EB395	EB390	>12µm	0.4-12µm	0.142857
EB395	EB392	>12µm	0.4-12µm	1
EB395	EB394	>12µm	0.4-12µm	1
EB395	EB396	>12µm	0.4-12µm	1

## Sheet: Comp. Abundance
Comparison analyses of Symbiodinaiceae abundance with Kruskal-Wallis rank sum test
Comparison	chi-squared	df	p-value
All site groups	21.1705	21	0.4486
seawater vs. sediment	19.9076	22	0.5271
0.4-12µm vs. > 2µm	20.125	22	0.5134

## Sheet: Comp. Alpha Div.
Comparison analyses of Symbiodiniaceae feature-observed with Kruskal-Wallis rank sum test
Comparisons	Group	H Statistic	p-value	q-value
All site groups		0.857308	0.651385
seawater vs. sediment		0.0988235	0.753246	0.753246
0.4-12µm vs. > 2µm		0.27	0.603332	0.603332
Symbiodiniaceae Shannon-Enthrophy with Kruskal-Wallis rank sum test
Comparisons	Group	H Statistic	p-value	q-value
All site groups	3	1.27209	0.529382	-
seawater vs. sediment	2	0.29449	0.587357	0.587357
0.4-12µm vs. > 2µm	2	0.584828	0.444426	0.444426

## Sheet: Comp. Beta Div.
Comparison analyses of Bray-Curtis dissimiliarity (BC) of Symbiodiniaceae with Permanova in 9999 permutations
Comparisons	Groups	Samples	pseudo-F	p-value	q-value
All site groups	3	24	0.676737	0.8003	-
seawater vs. sediment	2	24	0.767531	0.571	0.571
0.4-12µm vs. > 2µm	2	24	0.775209	0.5491	0.5491
